# Supplementary material for: A Genomic Comparative Analysis of Bacillus Coagulans Unravels the Genetic Potential of MA-13 Strain for Biotechnological Applications
Source: Preprints.org preprint supplement (doi:10.20944/preprints202112.0372.v1), 2021-12-22
Supplement: Supplementary file 1 [file supplementary]

## Sheet: Singleton
Tab S2. Singletons, core and non-core lists of the orthologous genes
Feature Id	Aliases	Genome	Type	Function
I001_RS0113595	GI:651962459, I001_RS0113595, WP_026684553.1	Bacillus_coagulans_CSIL1.RAST (77415/19/1)	gene	1,3-propanediol dehydrogenase (EC 1.1.1.202)
P421_RS10255	GI:737204725, P421_10260, P421_RS10255, WP_035189714.1	Bacillus_coagulans_P38.RAST (77415/23/1)	gene	2-dehydro-3-deoxygluconokinase (EC 2.7.1.45)
P421_RS13565	1.1.1.60, GI:737205447, P421_13565, P421_RS13565, WP_035190375.1, garR	Bacillus_coagulans_P38.RAST (77415/23/1)	gene	2-hydroxy-3-oxopropionate reductase (EC 1.1.1.60)
I001_RS0111200	GI:651962149, I001_RS0111200, WP_026684257.1	Bacillus_coagulans_CSIL1.RAST (77415/19/1)	gene	2-polyprenyl-6-methoxyphenol hydroxylase and related FAD-dependent oxidoreductases
I001_RS0107335	GI:651961367, I001_RS0107335, WP_026683858.1	Bacillus_coagulans_CSIL1.RAST (77415/19/1)	gene	3-dehydroquinate dehydratase I (EC 4.2.1.10)
P421_RS15820	GI:737206101, P421_15815, P421_RS15820, WP_035190998.1	Bacillus_coagulans_P38.RAST (77415/23/1)	gene	3-ketoacyl-CoA thiolase (EC 2.3.1.16) @ Acetyl-CoA acetyltransferase (EC 2.3.1.9)
D420_RS0119300	D420_RS0119300, GI:516121735, WP_017552315.1	Bacillus_coagulans_XZL9.RAST (77415/20/1)	gene	3D-(3,5/4)-trihydroxycyclohexane-1,2-dione hydrolase (EC 3.7.1.22)
P421_RS10250	GI:737204723, P421_10255, P421_RS10250, WP_035189713.1	Bacillus_coagulans_P38.RAST (77415/23/1)	gene	4-hydroxy-2-oxoglutarate aldolase (EC 4.1.3.16) @ 2-dehydro-3-deoxyphosphogluconate aldolase (EC 4.1.2.14)
P421_RS13555	GI:737205442, P421_13555, P421_RS13555, WP_035190370.1	Bacillus_coagulans_P38.RAST (77415/23/1)	gene	4-hydroxy-tetrahydrodipicolinate synthase (EC 4.3.3.7)
BCOA_RS26180	BCOA_RS26180, Bcoa_1744, GI:503863035, GeneID:11172029, WP_014097029.1	Bacillus_coagulans_36D1.RAST (77415/16/1)	gene	4-hydroxythreonine-4-phosphate dehydrogenase (EC 1.1.1.262)
D420_RS0119290	D420_RS0119290, GI:648412935, WP_026104686.1	Bacillus_coagulans_XZL9.RAST (77415/20/1)	gene	5-deoxy-glucuronate isomerase (EC 5.3.1.30)
C893_RS0117180	C893_RS0117180, GI:516124298, WP_017554878.1	Bacillus_coagulans_H-1.RAST (77415/22/1)	gene	5-hydroxyisourate hydrolase (EC 3.5.2.17)
D420_RS0119295	D420_RS0119295, GI:516121734, WP_017552314.1	Bacillus_coagulans_XZL9.RAST (77415/20/1)	gene	5-keto-2-deoxygluconokinase (EC 2.7.1.92)
IOE_RS0101350	GI:518550065, IOE_RS0101350, WP_019720272.1	Bacillus_coagulans_XZL4.RAST (77415/18/1)	gene	5-methylcytosine-specific restriction related enzyme
E2E33_006550	E2E33_006550, MBF8417998.1, rpmG	MA-13_genebank.gb_genome (77415/14/1)	gene	50S ribosomal protein L33
E2E33_013320	E2E33_013320, MBF8419234.1, rpmG	MA-13_genebank.gb_genome (77415/14/1)	gene	50S ribosomal protein L33
E2E33_004575	E2E33_004575, MBF8417632.1, rpmH	MA-13_genebank.gb_genome (77415/14/1)	gene	50S ribosomal protein L34
E2E33_006355	E2E33_006355, MBF8417959.1, rpmJ	MA-13_genebank.gb_genome (77415/14/1)	gene	50S ribosomal protein L36
I001_RS20210	GI:651962871, I001_RS20210, WP_026684927.1	Bacillus_coagulans_CSIL1.RAST (77415/19/1)	gene	6 kDa early secretory antigenic target ESAT-6 (EsxA)
E2E33_011725	E2E33_011725, MBF8418925.1	MA-13_genebank.gb_genome (77415/14/1)	gene	AAA family ATPase
E2E33_002410	E2E33_002410, MBF8417227.1	MA-13_genebank.gb_genome (77415/14/1)	gene	ABC transporter permease
C893_RS0105765	C893_RS0105765, GI:516122638, WP_017553218.1	Bacillus_coagulans_H-1.RAST (77415/22/1)	gene	ABC transporter, ATP-binding protein (cluster 3, basic aa/glutamine/opines)
D420_RS0110030	D420_RS0110030, GI:516120594, WP_017551174.1	Bacillus_coagulans_XZL9.RAST (77415/20/1)	gene	ABC transporter, ATP-binding protein (cluster 3, basic aa/glutamine/opines)
C893_RS0105760	C893_RS0105760, GI:516122637, WP_017553217.1	Bacillus_coagulans_H-1.RAST (77415/22/1)	gene	ABC transporter, permease protein (cluster 3, basic aa/glutamine/opines)
BCOA_RS30320	BCOA_RS30320, Bcoa_2531, GI:754206196, GeneID:11172805, WP_041818339.1	Bacillus_coagulans_36D1.RAST (77415/16/1)	gene	ABC transporter, permease protein 1 (cluster 5, nickel/peptides/opines)
BCOA_RS30325	BCOA_RS30325, Bcoa_2532, GI:754206198, GeneID:11172806, WP_041818340.1	Bacillus_coagulans_36D1.RAST (77415/16/1)	gene	ABC transporter, permease protein 2 (cluster 5, nickel/peptides/opines)
C893_RS0105755	C893_RS0105755, GI:516122636, WP_017553216.1	Bacillus_coagulans_H-1.RAST (77415/22/1)	gene	ABC transporter, substrate-binding protein (cluster 3, basic aa/glutamine/opines)
C893_RS0105785	C893_RS0105785, GI:516122642, WP_017553222.1	Bacillus_coagulans_H-1.RAST (77415/22/1)	gene	ABC transporter, substrate-binding protein (cluster 3, basic aa/glutamine/opines)
BCOA_RS30315	BCOA_RS30315, Bcoa_2530, GI:503863767, GeneID:11172804, WP_014097761.1	Bacillus_coagulans_36D1.RAST (77415/16/1)	gene	ABC transporter, substrate-binding protein (cluster 5, nickel/peptides/opines)
E2E33_006045	E2E33_006045, MBF8417900.1	MA-13_genebank.gb_genome (77415/14/1)	gene	AbrB/MazE/SpoVT family DNA-binding domain-containing protein
C893_RS0106445	C893_RS0106445, GI:516122741, WP_017553321.1	Bacillus_coagulans_H-1.RAST (77415/22/1)	gene	Acetaldehyde dehydrogenase (EC 1.2.1.10) @ Acetaldehyde dehydrogenase (EC 1.2.1.10), ethanolamine utilization cluster
C893_RS0106715	C893_RS0106715, GI:516122781, WP_017553361.1	Bacillus_coagulans_H-1.RAST (77415/22/1)	gene	Acetate kinase (EC 2.7.2.1)
C893_RS0105270	C893_RS0105270, GI:516122560, WP_017553140.1	Bacillus_coagulans_H-1.RAST (77415/22/1)	gene	Acetoacetyl-CoA synthetase (EC 6.2.1.16)
C893_RS0114925	C893_RS0114925, GI:516123952, WP_017554532.1	Bacillus_coagulans_H-1.RAST (77415/22/1)	gene	Acetyl-CoA acetyltransferase (EC 2.3.1.9)
E2E33_007990	E2E33_007990, MBF8418268.1	MA-13_genebank.gb_genome (77415/14/1)	gene	acid-soluble spore protein N
BCOA_RS19975	BCOA_RS19975, Bcoa_0547, GI:503861926, GeneID:11173478, WP_014095920.1	Bacillus_coagulans_36D1.RAST (77415/16/1)	gene	Acyl-CoA dehydrogenase
D420_RS0113770	D420_RS0113770, GI:503861926, WP_014095920.1	Bacillus_coagulans_XZL9.RAST (77415/20/1)	gene	Acyl-CoA dehydrogenase
I001_RS0112180	GI:503861926, I001_RS0112180, WP_014095920.1	Bacillus_coagulans_CSIL1.RAST (77415/19/1)	gene	Acyl-CoA dehydrogenase
P421_RS04255	GI:503861926, P421_04255, P421_RS04255, WP_014095920.1	Bacillus_coagulans_P38.RAST (77415/23/1)	gene	Acyl-CoA dehydrogenase
P421_RS08195	GI:917516893, P421_RS08195, WP_052123310.1	Bacillus_coagulans_P38.RAST (77415/23/1)	gene	Adenosylmethionine-8-amino-7-oxononanoate aminotransferase (EC 2.6.1.62)
I001_RS0107325	GI:737215230, I001_RS0107325, WP_035199935.1	Bacillus_coagulans_CSIL1.RAST (77415/19/1)	gene	Alcohol dehydrogenase (EC 1.1.1.1),Acetaldehyde dehydrogenase (EC 1.2.1.10)
I001_RS0102165	GI:651960352, I001_RS0102165, WP_026683431.1	Bacillus_coagulans_CSIL1.RAST (77415/19/1)	gene	Aldehyde dehydrogenase (EC 1.2.1.3)
C893_RS0102645	C893_RS0102645, GI:516122165, WP_017552745.1	Bacillus_coagulans_H-1.RAST (77415/22/1)	gene	Aldehyde dehydrogenase A (EC 1.2.1.22) @ Glycolaldehyde dehydrogenase (EC 1.2.1.21)
C893_RS0112095	C893_RS0112095, GI:516123554, WP_017554134.1, ssuB	Bacillus_coagulans_H-1.RAST (77415/22/1)	gene	Alkanesulfonates ABC transporter ATP-binding protein / Sulfonate ABC transporter, ATP-binding subunit SsuB
P421_RS16760	GI:737206503, P421_16745, P421_RS16760, WP_035191354.1	Bacillus_coagulans_P38.RAST (77415/23/1)	gene	Alkanesulfonates ABC transporter ATP-binding protein / Sulfonate ABC transporter, ATP-binding subunit SsuB
BCOA_RS21540	BCOA_RS21540, Bcoa_0868, GI:503862234, GeneID:11174452, WP_014096228.1	Bacillus_coagulans_36D1.RAST (77415/16/1)	gene	Allophanate hydrolase (EC 3.5.1.54)
I001_RS0114770	GI:916750521, I001_RS0114770, WP_051357577.1	Bacillus_coagulans_CSIL1.RAST (77415/19/1)	gene	alpha-galactosidase (EC 3.2.1.22)
E2E33_005845	3.5.1.4, E2E33_005845, MBF8417863.1	MA-13_genebank.gb_genome (77415/14/1)	gene	amidase
BCO26_RS12905	BCO26_2502, BCO26_RS12905, GI:503626368, WP_013860444.1	Bacillus_coagulans_2-6.RAST (77415/17/1)	gene	Aminopeptidase YpdF (MP-, MA-, MS-, AP-, NP- specific)
IOE_RS0100810	GI:518549990, IOE_RS0100810, WP_019720197.1	Bacillus_coagulans_XZL4.RAST (77415/18/1)	gene	Arabinan endo-1,5-alpha-L-arabinosidase A
C893_RS0111660	C893_RS0111660, GI:757633236, WP_042873043.1	Bacillus_coagulans_H-1.RAST (77415/22/1)	gene	Arginine utilization regulatory protein RocR
I001_RS0111525	GI:651962198, I001_RS0111525, WP_026684304.1	Bacillus_coagulans_CSIL1.RAST (77415/19/1)	gene	Argininosuccinate lyase-like protein
BF29_RS02395	BF29_RS02395, GI:755163584, WP_042512387.1	Bacillus_coagulans_DSM_1___ATCC_7050_1.RAST (77415/21/1)	gene	Arsenite/antimonite pump-driving ATPase ArsA (EC 3.6.3.16)
E2E33_009645	E2E33_009645, MBF8418561.1	MA-13_genebank.gb_genome (77415/14/1)	gene	aspartate/glutamate racemase family protein
D420_RS0110235	D420_RS0110235, GI:516120624, WP_017551204.1	Bacillus_coagulans_XZL9.RAST (77415/20/1)	gene	ATP-dependent DNA helicase UvrD/PcrA
E2E33_011705	E2E33_011705, MBF8418921.1	MA-13_genebank.gb_genome (77415/14/1)	gene	ATP-dependent helicase
BCOA_RS26165	BCOA_RS26165, Bcoa_1741, GI:503863032, GeneID:11172026, WP_014097026.1	Bacillus_coagulans_36D1.RAST (77415/16/1)	gene	ATP-utilizing enzyme of the PP-loop superfamily
P421_RS13760	GI:737205516, P421_13755, P421_RS13760, WP_035190443.1	Bacillus_coagulans_P38.RAST (77415/23/1)	gene	ATPase involved in DNA repair
P421_RS00050	GI:737202627, P421_00050, P421_RS00050, WP_035187834.1	Bacillus_coagulans_P38.RAST (77415/23/1)	gene	ATPase involved in DNA repair, phage associated
D420_RS0110035	D420_RS0110035, GI:516120595, WP_017551175.1	Bacillus_coagulans_XZL9.RAST (77415/20/1)	gene	Bacterial luciferase family protein YtmO, in cluster with L-cystine ABC transporter
D420_RS0100075	D420_RS0100075, GI:516119514, WP_017550094.1	Bacillus_coagulans_XZL9.RAST (77415/20/1)	gene	BcmA (hydroxymethyltransferase)
D420_RS0100080	D420_RS0100080, GI:516119515, WP_017550095.1	Bacillus_coagulans_XZL9.RAST (77415/20/1)	gene	BcmB (nucleosidase)
D420_RS0115850	D420_RS0115850, GI:516121286, WP_017551866.1	Bacillus_coagulans_XZL9.RAST (77415/20/1)	gene	BcmC (methyltransferase)
BF29_RS14190	BF29_2927, BF29_RS14190, GI:656146982, WP_029142375.1	Bacillus_coagulans_DSM_1___ATCC_7050_1.RAST (77415/21/1)	gene	benzoate MFS transporter BenK
C893_RS18555	C893_RS18555, GI:648412970, WP_026104721.1	Bacillus_coagulans_H-1.RAST (77415/22/1)	gene	benzoate MFS transporter BenK
I001_RS0114210	GI:651962540, I001_RS0114210, WP_026684629.1	Bacillus_coagulans_CSIL1.RAST (77415/19/1)	gene	benzoate MFS transporter BenK
IOE_RS0100815	GI:518549991, IOE_RS0100815, WP_019720198.1	Bacillus_coagulans_XZL4.RAST (77415/18/1)	gene	beta-galactosidase (EC 3.2.1.23)
P421_RS09205	GI:917516908, P421_RS09205, WP_052123325.1	Bacillus_coagulans_P38.RAST (77415/23/1)	gene	beta-galactosidase (EC 3.2.1.23)
P421_RS11225	GI:917516939, P421_RS11225, WP_052123356.1	Bacillus_coagulans_P38.RAST (77415/23/1)	gene	beta-N-acetylglucosaminidase (EC 3.2.1.52)
I001_RS20490	GI:916750513, I001_RS20490, WP_051357569.1	Bacillus_coagulans_CSIL1.RAST (77415/19/1)	gene	Biotin carboxyl carrier protein of acetyl-CoA carboxylase
I001_RS0114185	6.4.1.2, GI:651962537, I001_RS0114185, WP_026684626.1	Bacillus_coagulans_CSIL1.RAST (77415/19/1)	gene	Biotin carboxylase of acetyl-CoA carboxylase (EC 6.3.4.14)
P421_RS01825	GI:737203008, P421_01825, P421_RS01825, WP_035188202.1	Bacillus_coagulans_P38.RAST (77415/23/1)	gene	Branched-chain alpha-keto acid dehydrogenase, E1 component, alpha subunit (EC 1.2.4.4)
P421_RS01830	GI:737203246, P421_01830, P421_RS01830, WP_035188431.1	Bacillus_coagulans_P38.RAST (77415/23/1)	gene	Branched-chain alpha-keto acid dehydrogenase, E1 component, beta subunit (EC 1.2.4.4)
P421_RS01820	GI:737203006, P421_01820, P421_RS01820, WP_035188200.1	Bacillus_coagulans_P38.RAST (77415/23/1)	gene	Branched-chain amino acid dehydrogenase [deaminating] (EC 1.4.1.9)(EC 1.4.1.23)
E2E33_009145	E2E33_009145, MBF8418485.1	MA-13_genebank.gb_genome (77415/14/1)	gene	C40 family peptidase
P421_RS08205	GI:917516897, P421_RS08205, WP_052123314.1	Bacillus_coagulans_P38.RAST (77415/23/1)	gene	Carbon-nitrogen hydrolase
C893_RS0111540	C893_RS0111540, GI:516123461, WP_017554041.1	Bacillus_coagulans_H-1.RAST (77415/22/1)	gene	Catalase (EC 1.11.1.6)
IOE_RS0101120	GI:518550039, IOE_RS0101120, WP_019720246.1	Bacillus_coagulans_XZL4.RAST (77415/18/1)	gene	Cell wall-binding protein YocH
I001_RS0104310	GI:651960800, I001_RS0104310, WP_026683617.1	Bacillus_coagulans_CSIL1.RAST (77415/19/1)	gene	Chromate reductase (EC 1.6.5.2)
BCOA_RS26140	BCOA_RS26140, Bcoa_1735, GI:503863026, GeneID:11172020, WP_014097020.1	Bacillus_coagulans_36D1.RAST (77415/16/1)	gene	Circadian phase modifier
I001_RS0111190	GI:651962147, I001_RS0111190, WP_026684255.1	Bacillus_coagulans_CSIL1.RAST (77415/19/1)	gene	Coenzyme A ligase
I001_RS19955	GI:916750515, I001_RS19955, WP_051357571.1	Bacillus_coagulans_CSIL1.RAST (77415/19/1)	gene	Coenzyme A ligase
IOE_RS0116010	GI:518551986, IOE_RS0116010, WP_019722193.1	Bacillus_coagulans_XZL4.RAST (77415/18/1)	gene	COG0488: ATPase components of ABC transporters with duplicated ATPase domains
BF29_RS12440	BF29_2562, BF29_RS12440, GI:656149097, WP_029143085.1	Bacillus_coagulans_DSM_1___ATCC_7050_1.RAST (77415/21/1)	gene	ComEC like protein FIG012334
BF29_RS12780	BF29_2638, BF29_RS12780, GI:656149097, WP_029143085.1	Bacillus_coagulans_DSM_1___ATCC_7050_1.RAST (77415/21/1)	gene	ComEC like protein FIG012334
P421_RS16580	GI:737206393, P421_16570, P421_RS16580, WP_035191262.1	Bacillus_coagulans_P38.RAST (77415/23/1)	gene	conserved hypothetical protein
E2E33_013505	E2E33_013505, MBF8419263.1, cmpA	MA-13_genebank.gb_genome (77415/14/1)	gene	cortex morphogenetic protein CmpA
C893_RS18595	C893_RS18595, GI:916299651, WP_051034697.1	Bacillus_coagulans_H-1.RAST (77415/22/1)	gene	CRISPR-associated helicase Cas3
BCOA_RS27110	BCOA_RS27110, Bcoa_1935, GI:503863207, GeneID:11172216, WP_014097201.1	Bacillus_coagulans_36D1.RAST (77415/16/1)	gene	CRISPR-associated protein Cas1
BCO26_RS02145	BCO26_0393, BCO26_RS02145, GI:503624275, WP_013858351.1	Bacillus_coagulans_2-6.RAST (77415/17/1)	gene	CRISPR-associated protein, Csd2/Csh2 family
BCOA_RS21245	BCOA_RS21245, Bcoa_0803, GI:503624275, GeneID:11174387, WP_013858351.1	Bacillus_coagulans_36D1.RAST (77415/16/1)	gene	CRISPR-associated protein, Csd2/Csh2 family
D420_RS0111770	D420_RS0111770, GI:503624275, WP_013858351.1	Bacillus_coagulans_XZL9.RAST (77415/20/1)	gene	CRISPR-associated protein, Csd2/Csh2 family
C893_RS0102640	C893_RS0102640, GI:516122164, WP_017552744.1	Bacillus_coagulans_H-1.RAST (77415/22/1)	gene	Cys-tRNA(Pro) deacylase YbaK
I001_RS0107480	GI:651961413, I001_RS0107480, WP_026683881.1	Bacillus_coagulans_CSIL1.RAST (77415/19/1)	gene	Cystathionine beta-lyase (EC 4.4.1.8)
I001_RS0111250	GI:651962158, I001_RS0111250, WP_026684265.1	Bacillus_coagulans_CSIL1.RAST (77415/19/1)	gene	Cystathionine beta-lyase (EC 4.4.1.8)
D420_RS0109990	D420_RS0109990, GI:516120586, WP_017551166.1	Bacillus_coagulans_XZL9.RAST (77415/20/1)	gene	Cysteine synthase (EC 2.5.1.47)
I001_RS20075	GI:916750525, I001_RS20075, WP_051357581.1	Bacillus_coagulans_CSIL1.RAST (77415/19/1)	gene	Cytochrome c oxidase caa3-type assembly factor CtaG_BS (unrelated to Cox11-CtaG family)
BF29_RS04380	BF29_878, BF29_RS04380, GI:656148638, WP_029142923.1	Bacillus_coagulans_DSM_1___ATCC_7050_1.RAST (77415/21/1)	gene	Cytochrome c-type biogenesis protein CcdA (DsbD analog)
I001_RS0104270	3.5.4.1, GI:651960794, I001_RS0104270, WP_026683614.1	Bacillus_coagulans_CSIL1.RAST (77415/19/1)	gene	Cytosine deaminase (EC 3.5.4.1)
I001_RS0104275	GI:651960796, I001_RS0104275, WP_026683615.1	Bacillus_coagulans_CSIL1.RAST (77415/19/1)	gene	Cytosine/purine/uracil/thiamine/allantoin permease family protein
C893_RS0112085	C893_RS0112085, GI:648413093, WP_026104844.1	Bacillus_coagulans_H-1.RAST (77415/22/1)	gene	D-3-phosphoglycerate dehydrogenase (EC 1.1.1.95)
BF29_RS12235	BF29_2517, BF29_RS12235, GI:656148035, WP_029142723.1	Bacillus_coagulans_DSM_1___ATCC_7050_1.RAST (77415/21/1)	gene	D-alanyl-D-alanine carboxypeptidase (EC 3.4.16.4)
BF29_RS12565	BF29_2593, BF29_RS12565, GI:656148035, WP_029142723.1	Bacillus_coagulans_DSM_1___ATCC_7050_1.RAST (77415/21/1)	gene	D-alanyl-D-alanine carboxypeptidase (EC 3.4.16.4)
C893_RS0102930	C893_RS0102930, GI:516122205, WP_017552785.1	Bacillus_coagulans_H-1.RAST (77415/22/1)	gene	D-amino acid dehydrogenase (EC 1.4.99.6)
P421_RS13545	4.2.1.42, GI:737205437, P421_13545, P421_RS13545, WP_035190365.1, garD	Bacillus_coagulans_P38.RAST (77415/23/1)	gene	D-galactarate dehydratase (EC 4.2.1.42)
IOE_RS0100820	GI:518549992, IOE_RS0100820, WP_019720199.1	Bacillus_coagulans_XZL4.RAST (77415/18/1)	gene	D-mannonate oxidoreductase (EC 1.1.1.57)
I001_RS0117345	GI:651962911, I001_RS0117345, WP_026684959.1	Bacillus_coagulans_CSIL1.RAST (77415/19/1)	gene	Deoxyribose-phosphate aldolase (EC 4.1.2.4)
C893_RS0116490	C893_RS0116490, GI:516124186, WP_017554766.1	Bacillus_coagulans_H-1.RAST (77415/22/1)	gene	diguanylate cyclase/phosphodiesterase (GGDEF & EAL domains) with PAS/PAC sensor(s)
P421_RS01835	GI:737203011, P421_01835, P421_RS01835, WP_035188205.1	Bacillus_coagulans_P38.RAST (77415/23/1)	gene	Dihydrolipoamide acyltransferase component of branched-chain alpha-keto acid dehydrogenase complex (EC 2.3.1.168)
BF29_RS12210	BF29_2509, BF29_RS12210, GI:656148026, WP_029142719.1	Bacillus_coagulans_DSM_1___ATCC_7050_1.RAST (77415/21/1)	gene	Dimeric dUTPase (EC 3.6.1.23)
BF29_RS12540	BF29_2585, BF29_RS12540, GI:656148026, WP_029142719.1	Bacillus_coagulans_DSM_1___ATCC_7050_1.RAST (77415/21/1)	gene	Dimeric dUTPase (EC 3.6.1.23)
D420_RS0114640	D420_RS0114640, GI:648412894, WP_026104645.1	Bacillus_coagulans_XZL9.RAST (77415/20/1)	gene	DNA-binding response regulator KdpE
BCO26_RS14580	BCO26_2828, BCO26_RS14580, GI:754207673, WP_041819532.1	Bacillus_coagulans_2-6.RAST (77415/17/1)	gene	DNA-directed RNA polymerase delta subunit (EC 2.7.7.6)
I001_RS0107905	GI:651961531, I001_RS0107905, WP_026683936.1	Bacillus_coagulans_CSIL1.RAST (77415/19/1)	gene	DNA-directed RNA polymerase delta subunit (EC 2.7.7.6)
E2E33_011775	E2E33_011775, MBF8418935.1	MA-13_genebank.gb_genome (77415/14/1)	gene	DUF1492 domain-containing protein
E2E33_009355	E2E33_009355, MBF8418504.1	MA-13_genebank.gb_genome (77415/14/1)	gene	DUF1540 domain-containing protein
E2E33_013295	E2E33_013295, MBF8419229.1	MA-13_genebank.gb_genome (77415/14/1)	gene	DUF2759 domain-containing protein
E2E33_001215	E2E33_001215, MBF8417006.1	MA-13_genebank.gb_genome (77415/14/1)	gene	DUF3986 family protein
E2E33_009365	E2E33_009365, MBF8418506.1	MA-13_genebank.gb_genome (77415/14/1)	gene	DUF4021 domain-containing protein
E2E33_008060	E2E33_008060, MBF8418280.1	MA-13_genebank.gb_genome (77415/14/1)	gene	DUF4023 domain-containing protein
E2E33_011890	E2E33_011890, MBF8418958.1	MA-13_genebank.gb_genome (77415/14/1)	gene	DUF4190 domain-containing protein
E2E33_006080	E2E33_006080, MBF8417907.1	MA-13_genebank.gb_genome (77415/14/1)	gene	DUF5626 family protein
E2E33_011735	E2E33_011735, MBF8418927.1	MA-13_genebank.gb_genome (77415/14/1)	gene	DUF669 domain-containing protein
BF29_RS09345	BF29_1907, BF29_RS09345, GI:656148745, WP_029142965.1	Bacillus_coagulans_DSM_1___ATCC_7050_1.RAST (77415/21/1)	gene	Effector protein precursor peptide YydF
P421_RS15735	GI:656148745, P421_15730, P421_RS15735, WP_029142965.1	Bacillus_coagulans_P38.RAST (77415/23/1)	gene	Effector protein precursor peptide YydF
I001_RS0106110	GI:651961175, I001_RS0106110, WP_026683773.1	Bacillus_coagulans_CSIL1.RAST (77415/19/1)	gene	Efflux ABC transporter, ATP-binding protein
BCOA_RS21565	BCOA_RS21565, Bcoa_0873, GI:918008936, GeneID:11174457, WP_052301522.1	Bacillus_coagulans_36D1.RAST (77415/16/1)	gene	Endo-1,4-beta-xylanase (EC 3.2.1.8)
E2E33_013190	E2E33_013190, MBF8419208.1	MA-13_genebank.gb_genome (77415/14/1)	gene	FAD-dependent oxidoreductase
E2E33_007985	E2E33_007985, MBF8418267.1	MA-13_genebank.gb_genome (77415/14/1)	gene	FbpB family small basic protein
I001_RS0104305	GI:651960798, I001_RS0104305, WP_026683616.1	Bacillus_coagulans_CSIL1.RAST (77415/19/1)	gene	Ferredoxin
BF29_RS10400	BF29_2126, BF29_RS10400, GI:656149198, WP_029143113.1	Bacillus_coagulans_DSM_1___ATCC_7050_1.RAST (77415/21/1)	gene	FIG00672663: hypothetical protein
C893_RS0102935	C893_RS0102935, GI:516122206, WP_017552786.1	Bacillus_coagulans_H-1.RAST (77415/22/1)	gene	FIG00672749: hypothetical protein
I001_RS0111530	GI:651962199, I001_RS0111530, WP_026684305.1	Bacillus_coagulans_CSIL1.RAST (77415/19/1)	gene	FIG00673147: hypothetical protein
BCO26_RS11750	BCO26_2291, BCO26_RS11750, GI:503626163, WP_013860239.1	Bacillus_coagulans_2-6.RAST (77415/17/1)	gene	FIG00673598: hypothetical protein
BCO26_RS01960	BCO26_0358, BCO26_RS01960, GI:503624240, WP_013858316.1	Bacillus_coagulans_2-6.RAST (77415/17/1)	gene	FIG00986557: hypothetical protein
C893_RS17775	C893_RS17775, GI:516122774, WP_017553354.1	Bacillus_coagulans_H-1.RAST (77415/22/1)	gene	FIG01164982: hypothetical protein
BCOA_RS26145	BCOA_RS26145, Bcoa_1736, GI:503863027, GeneID:11172021, WP_014097021.1	Bacillus_coagulans_36D1.RAST (77415/16/1)	gene	FIG01165809: hypothetical protein
BCOA_RS21555	BCOA_RS21555, Bcoa_0871, GI:503862237, GeneID:11174455, WP_014096231.1	Bacillus_coagulans_36D1.RAST (77415/16/1)	gene	FIG01202011: hypothetical protein
I001_RS0118450	GI:651963069, I001_RS0118450, WP_026685093.1	Bacillus_coagulans_CSIL1.RAST (77415/19/1)	gene	FIG01225907: hypothetical protein
BCO26_RS04420	BCO26_RS04420, GI:754206880, WP_041818861.1	Bacillus_coagulans_2-6.RAST (77415/17/1)	gene	FIG01226944: hypothetical protein
BCOA_RS18880	BCOA_RS18880, Bcoa_0340, GI:503861730, GeneID:11173271, WP_014095724.1	Bacillus_coagulans_36D1.RAST (77415/16/1)	gene	FIG01226944: hypothetical protein
BF29_RS16410	BF29_3370, BF29_RS16410, GI:516123381, WP_017553961.1	Bacillus_coagulans_DSM_1___ATCC_7050_1.RAST (77415/21/1)	gene	FIG01226944: hypothetical protein
C893_RS0110760	C893_RS0110760, GI:516123381, WP_017553961.1	Bacillus_coagulans_H-1.RAST (77415/22/1)	gene	FIG01226944: hypothetical protein
D420_RS0115900	D420_RS0115900, GI:503861730, WP_014095724.1	Bacillus_coagulans_XZL9.RAST (77415/20/1)	gene	FIG01226944: hypothetical protein
I001_RS0109160	GI:503861730, I001_RS0109160, WP_014095724.1	Bacillus_coagulans_CSIL1.RAST (77415/19/1)	gene	FIG01226944: hypothetical protein
IOE_RS0113030	GI:518551624, IOE_RS0113030, WP_019721831.1	Bacillus_coagulans_XZL4.RAST (77415/18/1)	gene	FIG01226944: hypothetical protein
P421_RS10425	GI:516123381, P421_10430, P421_RS10425, WP_017553961.1	Bacillus_coagulans_P38.RAST (77415/23/1)	gene	FIG01226944: hypothetical protein
P421_RS16515	GI:737206363, P421_16505, P421_RS16515, WP_035191235.1	Bacillus_coagulans_P38.RAST (77415/23/1)	gene	FIG01230249: hypothetical protein
P421_RS00020	GI:737197437, P421_00020, P421_RS00020, WP_035182898.1	Bacillus_coagulans_P38.RAST (77415/23/1)	gene	FIG01234691: hypothetical protein
D420_RS0119310	D420_RS0119310, GI:916304120, WP_051039166.1	Bacillus_coagulans_XZL9.RAST (77415/20/1)	gene	FIG01246210: hypothetical protein
D420_RS19770	D420_RS19770, GI:516120062, WP_017550642.1	Bacillus_coagulans_XZL9.RAST (77415/20/1)	gene	FIG131328: Predicted ATP-dependent endonuclease of the OLD family
BF29_RS15425	BF29_RS15425, GI:518551480, WP_019721687.1	Bacillus_coagulans_DSM_1___ATCC_7050_1.RAST (77415/21/1)	gene	Flagellin protein FlaA
C893_RS0108850	C893_RS0108850, GI:518551480, WP_019721687.1	Bacillus_coagulans_H-1.RAST (77415/22/1)	gene	Flagellin protein FlaA
IOE_RS0112085	GI:518551480, IOE_RS0112085, WP_019721687.1	Bacillus_coagulans_XZL4.RAST (77415/18/1)	gene	Flagellin protein FlaA
D420_RS0119305	4.1.2.13, D420_RS0119305, GI:516121736, WP_017552316.1	Bacillus_coagulans_XZL9.RAST (77415/20/1)	gene	Fructose-bisphosphate aldolase class II (EC 4.1.2.13)
I001_RS0114605	GI:651962596, I001_RS0114605, WP_026684682.1	Bacillus_coagulans_CSIL1.RAST (77415/19/1)	gene	Galactofuranose transferase
P421_RS10245	GI:737204721, P421_10250, P421_RS10245, WP_035189711.1	Bacillus_coagulans_P38.RAST (77415/23/1)	gene	Galactonate dehydratase (EC 4.2.1.6)
P421_RS10265	GI:737204729, P421_10270, P421_RS10265, WP_035189718.1	Bacillus_coagulans_P38.RAST (77415/23/1)	gene	Galactonate dehydratase (EC 4.2.1.6)
BCO26_RS01885	BCO26_0344, BCO26_RS01885, GI:503624226, WP_013858302.1	Bacillus_coagulans_2-6.RAST (77415/17/1)	gene	Galacturonosyl transferase
E2E33_004990	E2E33_004990, MBF8417710.1	MA-13_genebank.gb_genome (77415/14/1)	gene	GapA-binding peptide SR1P
BCOA_RS25325	BCOA_RS25325, Bcoa_1572, GI:503862875, GeneID:11171862, WP_014096869.1	Bacillus_coagulans_36D1.RAST (77415/16/1)	gene	Gentisate 1,2-dioxygenase (EC 1.13.11.4)
P421_RS13570	4.2.1.40, GI:737205449, P421_13570, P421_RS13570, WP_035190377.1, gudD	Bacillus_coagulans_P38.RAST (77415/23/1)	gene	Glucarate dehydratase (EC 4.2.1.40)
I001_RS0111295	GI:651962167, I001_RS0111295, WP_026684274.1	Bacillus_coagulans_CSIL1.RAST (77415/19/1)	gene	Glucosamine--fructose-6-phosphate aminotransferase [isomerizing] (EC 2.6.1.16)
C893_RS0107925	C893_RS0107925, GI:516122952, WP_017553532.1	Bacillus_coagulans_H-1.RAST (77415/22/1)	gene	Glutamine-dependent 2-keto-4-methylthiobutyrate transaminase
D420_RS0110040	D420_RS0110040, GI:516120596, WP_017551176.1	Bacillus_coagulans_XZL9.RAST (77415/20/1)	gene	glutaredoxin family protein
D420_RS0119355	D420_RS0119355, GI:516121745, WP_017552325.1	Bacillus_coagulans_XZL9.RAST (77415/20/1)	gene	Glyceraldehyde-3-phosphate ketol-isomerase (EC 5.3.1.1)
P421_RS13575	GI:737205452, P421_13575, P421_RS13575, WP_035190380.1	Bacillus_coagulans_P38.RAST (77415/23/1)	gene	Glycerate kinase (EC 2.7.1.31)
I001_RS0113575	1.1.1.6, GI:651962455, I001_RS0113575, WP_026684549.1, gldA	Bacillus_coagulans_CSIL1.RAST (77415/19/1)	gene	Glycerol dehydrogenase (EC 1.1.1.6)
I001_RS0117705	GI:651962966, I001_RS0117705, WP_026684999.1	Bacillus_coagulans_CSIL1.RAST (77415/19/1)	gene	Glycerol-3-phosphate transporter
C893_RS0116700	C893_RS0116700, GI:516124219, WP_017554799.1	Bacillus_coagulans_H-1.RAST (77415/22/1)	gene	Glycosyltransferase
E2E33_000405	E2E33_000405, MBF8416863.1	MA-13_genebank.gb_genome (77415/14/1)	gene	glycosyltransferase family 2 protein
E2E33_003615	E2E33_003615, MBF8417452.1	MA-13_genebank.gb_genome (77415/14/1)	gene	glycosyltransferase family 39 protein
C893_RS0113160	C893_RS0113160, GI:516123698, WP_017554278.1	Bacillus_coagulans_H-1.RAST (77415/22/1)	gene	GTP pyrophosphokinase (EC 2.7.6.5)
BF29_RS11040	BF29_RS11040, GI:755163639, WP_042512442.1	Bacillus_coagulans_DSM_1___ATCC_7050_1.RAST (77415/21/1)	gene	GTPase and tRNA-U34 5-formylation enzyme TrmE
E2E33_000085	E2E33_000085, MBF8416808.1	MA-13_genebank.gb_genome (77415/14/1)	gene	helix-turn-helix domain-containing protein
E2E33_000640	E2E33_000640, MBF8416906.1	MA-13_genebank.gb_genome (77415/14/1)	gene	helix-turn-helix domain-containing protein
E2E33_011150	E2E33_011150, MBF8418817.1	MA-13_genebank.gb_genome (77415/14/1)	gene	helix-turn-helix domain-containing protein
E2E33_001340	E2E33_001340, MBF8417031.1	MA-13_genebank.gb_genome (77415/14/1)	gene	histidine kinase
E2E33_011810	E2E33_011810, MBF8418942.1	MA-13_genebank.gb_genome (77415/14/1)	gene	HK97 family phage prohead protease
E2E33_011835	E2E33_011835, MBF8418947.1	MA-13_genebank.gb_genome (77415/14/1)	gene	HK97 gp10 family phage protein
E2E33_011755	E2E33_011755, MBF8418931.1	MA-13_genebank.gb_genome (77415/14/1)	gene	HNH endonuclease
E2E33_011785	E2E33_011785, MBF8418937.1	MA-13_genebank.gb_genome (77415/14/1)	gene	HNH endonuclease
BF29_RS12370	BF29_2548, BF29_RS12370, GI:656148381, WP_029142828.1	Bacillus_coagulans_DSM_1___ATCC_7050_1.RAST (77415/21/1)	gene	HNH homing endonuclease
BF29_RS12710	BF29_2624, BF29_RS12710, GI:656148381, WP_029142828.1	Bacillus_coagulans_DSM_1___ATCC_7050_1.RAST (77415/21/1)	gene	HNH homing endonuclease
BCO26_RS12895	BCO26_2500, BCO26_RS12895, GI:503626366, WP_013860442.1	Bacillus_coagulans_2-6.RAST (77415/17/1)	gene	hypothetical cytosolic protein
BCO26_RS05515	BCO26_RS05515, GI:754206964, WP_041818931.1	Bacillus_coagulans_2-6.RAST (77415/17/1)	gene	hypothetical protein
BCO26_RS05795	BCO26_RS05795, GI:754206993, WP_041818955.1	Bacillus_coagulans_2-6.RAST (77415/17/1)	gene	hypothetical protein
BCO26_RS00635	BCO26_RS00635, GI:754206525, WP_041818580.1	Bacillus_coagulans_2-6.RAST (77415/17/1)	gene	hypothetical protein
BCO26_RS06335	BCO26_1233, BCO26_RS06335, GI:503625112, WP_013859188.1	Bacillus_coagulans_2-6.RAST (77415/17/1)	gene	hypothetical protein
BCO26_RS06540	BCO26_RS06540, GI:754207078, WP_041819025.1	Bacillus_coagulans_2-6.RAST (77415/17/1)	gene	hypothetical protein
BCO26_RS06835	BCO26_RS06835, GI:754207093, WP_041819037.1	Bacillus_coagulans_2-6.RAST (77415/17/1)	gene	hypothetical protein
BCO26_RS06900	BCO26_RS06900, GI:908639514, WP_049783535.1	Bacillus_coagulans_2-6.RAST (77415/17/1)	gene	hypothetical protein
BCO26_RS06995	BCO26_RS06995, GI:656144938, WP_029141592.1	Bacillus_coagulans_2-6.RAST (77415/17/1)	gene	hypothetical protein
BCO26_RS07110	BCO26_RS07110, GI:908639515, WP_049783536.1	Bacillus_coagulans_2-6.RAST (77415/17/1)	gene	hypothetical protein
BCO26_RS07310	BCO26_RS07310, GI:754207124, WP_041819063.1	Bacillus_coagulans_2-6.RAST (77415/17/1)	gene	hypothetical protein
BCO26_RS07320	BCO26_RS07320, GI:754207125, WP_041819064.1	Bacillus_coagulans_2-6.RAST (77415/17/1)	gene	hypothetical protein
BCO26_RS08010	BCO26_RS08010, GI:754207180, WP_041819109.1	Bacillus_coagulans_2-6.RAST (77415/17/1)	gene	hypothetical protein
BCO26_RS08290	BCO26_1617, BCO26_RS08290, GI:503625493, WP_013859569.1	Bacillus_coagulans_2-6.RAST (77415/17/1)	gene	hypothetical protein
BCO26_RS09605	BCO26_RS09605, GI:754207282, WP_041819206.1	Bacillus_coagulans_2-6.RAST (77415/17/1)	gene	hypothetical protein
BCO26_RS09645	BCO26_RS09645, GI:754207286, WP_041819209.1	Bacillus_coagulans_2-6.RAST (77415/17/1)	gene	hypothetical protein
BCO26_RS10555	BCO26_RS10555, GI:754207374, WP_041819284.1	Bacillus_coagulans_2-6.RAST (77415/17/1)	gene	hypothetical protein
BCO26_RS11275	BCO26_RS11275, GI:516124271, WP_017554851.1	Bacillus_coagulans_2-6.RAST (77415/17/1)	gene	hypothetical protein
BCO26_RS11415	BCO26_2228, BCO26_RS11415, GI:754207446, WP_041819345.1	Bacillus_coagulans_2-6.RAST (77415/17/1)	gene	hypothetical protein
BCO26_RS11605	BCO26_RS11605, GI:754207460, WP_041819357.1	Bacillus_coagulans_2-6.RAST (77415/17/1)	gene	hypothetical protein
BCO26_RS01270	BCO26_RS01270, GI:754206589, WP_041818628.1	Bacillus_coagulans_2-6.RAST (77415/17/1)	gene	hypothetical protein
BCO26_RS11760	BCO26_2293, BCO26_RS11760, GI:503626165, WP_013860241.1	Bacillus_coagulans_2-6.RAST (77415/17/1)	gene	hypothetical protein
BCO26_RS12375	BCO26_RS12375, GI:754207523, WP_041819409.1	Bacillus_coagulans_2-6.RAST (77415/17/1)	gene	hypothetical protein
BCO26_RS12410	BCO26_RS12410, GI:447208880, WP_001286136.1	Bacillus_coagulans_2-6.RAST (77415/17/1)	gene	hypothetical protein
BCO26_RS12775	BCO26_RS12775, GI:754207556, WP_041819436.1	Bacillus_coagulans_2-6.RAST (77415/17/1)	gene	hypothetical protein
BCO26_RS12865	BCO26_RS12865, GI:754207564, WP_041819443.1	Bacillus_coagulans_2-6.RAST (77415/17/1)	gene	hypothetical protein
BCO26_RS12970	BCO26_RS12970, GI:754207578, WP_041819455.1	Bacillus_coagulans_2-6.RAST (77415/17/1)	gene	hypothetical protein
BCO26_RS13000	BCO26_RS13000, GI:503863133, WP_014097127.1	Bacillus_coagulans_2-6.RAST (77415/17/1)	gene	hypothetical protein
BCO26_RS13080	BCO26_2540, BCO26_RS13080, GI:503626406, WP_013860482.1	Bacillus_coagulans_2-6.RAST (77415/17/1)	gene	hypothetical protein
BCO26_RS13405	BCO26_RS13405, GI:754207605, WP_041819476.1	Bacillus_coagulans_2-6.RAST (77415/17/1)	gene	hypothetical protein
BCO26_RS13560	BCO26_RS13560, GI:754207609, WP_041819479.1	Bacillus_coagulans_2-6.RAST (77415/17/1)	gene	hypothetical protein
BCO26_RS14055	BCO26_RS14055, GI:754207643, WP_041819508.1	Bacillus_coagulans_2-6.RAST (77415/17/1)	gene	hypothetical protein
BCO26_RS01495	BCO26_0265, BCO26_RS01495, GI:754206634, WP_041818665.1	Bacillus_coagulans_2-6.RAST (77415/17/1)	gene	hypothetical protein
BCO26_RS14485	BCO26_RS14485, GI:754207667, WP_041819527.1	Bacillus_coagulans_2-6.RAST (77415/17/1)	gene	hypothetical protein
BCO26_RS14540	BCO26_RS14540, GI:754207669, WP_041819529.1	Bacillus_coagulans_2-6.RAST (77415/17/1)	gene	hypothetical protein
BCO26_RS14675	BCO26_RS14675, GI:754207679, WP_041819537.1	Bacillus_coagulans_2-6.RAST (77415/17/1)	gene	hypothetical protein
BCO26_RS14885	BCO26_RS14885, GI:754207706, WP_041819561.1	Bacillus_coagulans_2-6.RAST (77415/17/1)	gene	hypothetical protein
BCO26_RS15130	BCO26_RS15130, GI:754207721, WP_041819573.1	Bacillus_coagulans_2-6.RAST (77415/17/1)	gene	hypothetical protein
BCO26_RS00205	BCO26_RS00205, GI:754206495, WP_041818554.1	Bacillus_coagulans_2-6.RAST (77415/17/1)	gene	hypothetical protein
BCO26_RS01890	BCO26_0345, BCO26_RS01890, GI:503624227, WP_013858303.1	Bacillus_coagulans_2-6.RAST (77415/17/1)	gene	hypothetical protein
BCO26_RS01895	BCO26_0346, BCO26_RS01895, GI:503624228, WP_013858304.1	Bacillus_coagulans_2-6.RAST (77415/17/1)	gene	hypothetical protein
BCO26_RS01965	BCO26_RS01965, GI:754206665, WP_041818690.1	Bacillus_coagulans_2-6.RAST (77415/17/1)	gene	hypothetical protein
BCO26_RS01970	BCO26_0359, BCO26_RS01970, GI:503624241, WP_013858317.1	Bacillus_coagulans_2-6.RAST (77415/17/1)	gene	hypothetical protein
BCO26_RS01980	BCO26_RS01980, GI:754206669, WP_041818694.1	Bacillus_coagulans_2-6.RAST (77415/17/1)	gene	hypothetical protein
BCO26_RS01985	BCO26_0361, BCO26_RS01985, GI:503624243, WP_013858319.1	Bacillus_coagulans_2-6.RAST (77415/17/1)	gene	hypothetical protein
BCO26_RS15365	BCO26_RS15365, GI:908639508, WP_049783529.1	Bacillus_coagulans_2-6.RAST (77415/17/1)	gene	hypothetical protein
BCO26_RS02175	BCO26_0400, BCO26_RS02175, GI:503624282, WP_013858358.1	Bacillus_coagulans_2-6.RAST (77415/17/1)	gene	hypothetical protein
BCO26_RS02240	BCO26_0414, BCO26_RS02240, GI:754206690, WP_041818710.1	Bacillus_coagulans_2-6.RAST (77415/17/1)	gene	hypothetical protein
BCO26_RS02265	BCO26_RS02265, GI:754206694, WP_041818713.1	Bacillus_coagulans_2-6.RAST (77415/17/1)	gene	hypothetical protein
BCO26_RS02575	BCO26_RS02575, GI:754206729, WP_041818741.1	Bacillus_coagulans_2-6.RAST (77415/17/1)	gene	hypothetical protein
BCO26_RS00280	BCO26_RS00280, GI:754206502, WP_041818561.1	Bacillus_coagulans_2-6.RAST (77415/17/1)	gene	hypothetical protein
BCO26_RS02580	BCO26_0481, BCO26_RS02580, GI:503624362, WP_013858438.1	Bacillus_coagulans_2-6.RAST (77415/17/1)	gene	hypothetical protein
BCO26_RS03055	BCO26_RS03055, GI:754206776, WP_041818778.1	Bacillus_coagulans_2-6.RAST (77415/17/1)	gene	hypothetical protein
BCO26_RS03270	BCO26_RS03270, GI:754206782, WP_041818783.1	Bacillus_coagulans_2-6.RAST (77415/17/1)	gene	hypothetical protein
BCO26_RS03330	BCO26_RS03330, GI:754206790, WP_041818789.1	Bacillus_coagulans_2-6.RAST (77415/17/1)	gene	hypothetical protein
BCO26_RS15370	BCO26_RS15370, GI:516121085, WP_017551665.1	Bacillus_coagulans_2-6.RAST (77415/17/1)	gene	hypothetical protein
BCO26_RS03625	BCO26_0689, BCO26_RS03625, GI:754206816, WP_041818810.1	Bacillus_coagulans_2-6.RAST (77415/17/1)	gene	hypothetical protein
BCO26_RS03925	BCO26_RS03925, GI:754206833, WP_041818824.1	Bacillus_coagulans_2-6.RAST (77415/17/1)	gene	hypothetical protein
BCO26_RS04010	BCO26_RS04010, GI:516119648, WP_017550228.1	Bacillus_coagulans_2-6.RAST (77415/17/1)	gene	hypothetical protein
BCO26_RS04080	BCO26_RS04080, GI:754206842, WP_041818831.1	Bacillus_coagulans_2-6.RAST (77415/17/1)	gene	hypothetical protein
BCO26_RS04290	BCO26_RS04290, GI:754206868, WP_041818852.1	Bacillus_coagulans_2-6.RAST (77415/17/1)	gene	hypothetical protein
BCO26_RS04515	BCO26_RS04515, GI:754206885, WP_041818865.1	Bacillus_coagulans_2-6.RAST (77415/17/1)	gene	hypothetical protein
BCO26_RS04720	BCO26_0903, BCO26_RS04720, GI:503624784, WP_013858860.1	Bacillus_coagulans_2-6.RAST (77415/17/1)	gene	hypothetical protein
BCO26_RS04730	BCO26_0905, BCO26_RS04730, GI:503624786, WP_013858862.1	Bacillus_coagulans_2-6.RAST (77415/17/1)	gene	hypothetical protein
BCO26_RS04740	BCO26_RS04740, GI:754206907, WP_041818884.1	Bacillus_coagulans_2-6.RAST (77415/17/1)	gene	hypothetical protein
BCO26_RS04750	BCO26_0907, BCO26_RS04750, GI:503624788, WP_013858864.1	Bacillus_coagulans_2-6.RAST (77415/17/1)	gene	hypothetical protein
BCO26_RS04915	BCO26_RS04915, GI:754206921, WP_041818896.1	Bacillus_coagulans_2-6.RAST (77415/17/1)	gene	hypothetical protein
BCOA_RS34350	BCOA_RS34350, GI:917435379, GeneID:25395563, WP_052042091.1	Bacillus_coagulans_36D1.RAST (77415/16/1)	gene	hypothetical protein
BCOA_RS23980	BCOA_RS23980, Bcoa_1319, GI:503862641, GeneID:11174901, WP_014096635.1	Bacillus_coagulans_36D1.RAST (77415/16/1)	gene	hypothetical protein
BCOA_RS23985	BCOA_RS23985, Bcoa_1320, GI:503862642, GeneID:11174902, WP_014096636.1	Bacillus_coagulans_36D1.RAST (77415/16/1)	gene	hypothetical protein
BCOA_RS23990	BCOA_RS23990, Bcoa_1321, GI:503862643, GeneID:11174903, WP_014096637.1	Bacillus_coagulans_36D1.RAST (77415/16/1)	gene	hypothetical protein
BCOA_RS24000	BCOA_RS24000, Bcoa_1323, GI:503862645, GeneID:11174905, WP_014096639.1	Bacillus_coagulans_36D1.RAST (77415/16/1)	gene	hypothetical protein
BCOA_RS24040	BCOA_RS24040, GI:737197659, GeneID:23676457, WP_035183113.1	Bacillus_coagulans_36D1.RAST (77415/16/1)	gene	hypothetical protein
BCOA_RS24170	BCOA_RS24170, Bcoa_1354, GI:503862675, GeneID:11174936, WP_014096669.1	Bacillus_coagulans_36D1.RAST (77415/16/1)	gene	hypothetical protein
BCOA_RS25330	BCOA_RS25330, Bcoa_1573, GI:503862876, GeneID:11171863, WP_014096870.1	Bacillus_coagulans_36D1.RAST (77415/16/1)	gene	hypothetical protein
BCOA_RS25335	BCOA_RS25335, Bcoa_1574, GI:503862877, GeneID:11171864, WP_014096871.1	Bacillus_coagulans_36D1.RAST (77415/16/1)	gene	hypothetical protein
BCOA_RS25995	BCOA_RS25995, Bcoa_1707, GI:503862998, GeneID:11171992, WP_014096992.1	Bacillus_coagulans_36D1.RAST (77415/16/1)	gene	hypothetical protein
BCOA_RS26005	BCOA_RS26005, Bcoa_1709, GI:503863000, GeneID:11171994, WP_014096994.1	Bacillus_coagulans_36D1.RAST (77415/16/1)	gene	hypothetical protein
BCOA_RS26060	BCOA_RS26060, Bcoa_1721, GI:503863012, GeneID:11172006, WP_014097006.1	Bacillus_coagulans_36D1.RAST (77415/16/1)	gene	hypothetical protein
BCOA_RS26125	BCOA_RS26125, GI:754205847, GeneID:23676485, WP_041818027.1	Bacillus_coagulans_36D1.RAST (77415/16/1)	gene	hypothetical protein
BCOA_RS26150	BCOA_RS26150, Bcoa_1737, GI:503863028, GeneID:11172022, WP_014097022.1	Bacillus_coagulans_36D1.RAST (77415/16/1)	gene	hypothetical protein
BCOA_RS26175	BCOA_RS26175, Bcoa_1743, GI:503863034, GeneID:11172028, WP_014097028.1	Bacillus_coagulans_36D1.RAST (77415/16/1)	gene	hypothetical protein
BCOA_RS26710	BCOA_RS26710, Bcoa_1856, GI:503863133, GeneID:11172137, WP_014097127.1	Bacillus_coagulans_36D1.RAST (77415/16/1)	gene	hypothetical protein
BCOA_RS26730	BCOA_RS26730, GI:754205859, GeneID:23676498, WP_041818038.1	Bacillus_coagulans_36D1.RAST (77415/16/1)	gene	hypothetical protein
BCOA_RS26745	BCOA_RS26745, Bcoa_1862, GI:503863139, GeneID:11172143, WP_014097133.1	Bacillus_coagulans_36D1.RAST (77415/16/1)	gene	hypothetical protein
BCOA_RS26770	BCOA_RS26770, GI:754205862, GeneID:23676499, WP_041818040.1	Bacillus_coagulans_36D1.RAST (77415/16/1)	gene	hypothetical protein
BCOA_RS26810	BCOA_RS26810, GI:754205864, GeneID:23676500, WP_041818042.1	Bacillus_coagulans_36D1.RAST (77415/16/1)	gene	hypothetical protein
BCOA_RS27435	BCOA_RS27435, GI:503863269, GeneID:23676505, WP_014097263.1	Bacillus_coagulans_36D1.RAST (77415/16/1)	gene	hypothetical protein
BCOA_RS27605	BCOA_RS27605, Bcoa_2039, GI:503863304, GeneID:11172318, WP_014097298.1	Bacillus_coagulans_36D1.RAST (77415/16/1)	gene	hypothetical protein
BCOA_RS27665	BCOA_RS27665, GI:754205891, GeneID:23676511, WP_041818069.1	Bacillus_coagulans_36D1.RAST (77415/16/1)	gene	hypothetical protein
BCOA_RS27910	BCOA_RS27910, GI:754205900, GeneID:23676516, WP_041818077.1	Bacillus_coagulans_36D1.RAST (77415/16/1)	gene	hypothetical protein
BCOA_RS28190	BCOA_RS28190, Bcoa_2141, GI:503863402, GeneID:11174304, WP_014097396.1	Bacillus_coagulans_36D1.RAST (77415/16/1)	gene	hypothetical protein
BCOA_RS28735	BCOA_RS28735, GI:737198708, GeneID:23676527, WP_035184110.1	Bacillus_coagulans_36D1.RAST (77415/16/1)	gene	hypothetical protein
BCOA_RS28805	BCOA_RS28805, GI:754205915, GeneID:23676531, WP_041818092.1	Bacillus_coagulans_36D1.RAST (77415/16/1)	gene	hypothetical protein
BCOA_RS29070	BCOA_RS29070, GI:763172294, GeneID:23676537, WP_044051945.1	Bacillus_coagulans_36D1.RAST (77415/16/1)	gene	hypothetical protein
BCOA_RS29075	BCOA_RS29075, Bcoa_2311, GI:503863564, GeneID:11172587, WP_014097558.1	Bacillus_coagulans_36D1.RAST (77415/16/1)	gene	hypothetical protein
BCOA_RS29085	BCOA_RS29085, Bcoa_2312, GI:503863565, GeneID:11172588, WP_014097559.1	Bacillus_coagulans_36D1.RAST (77415/16/1)	gene	hypothetical protein
BCOA_RS29095	BCOA_RS29095, Bcoa_2314, GI:503863567, GeneID:11172590, WP_014097561.1	Bacillus_coagulans_36D1.RAST (77415/16/1)	gene	hypothetical protein
BCOA_RS29105	BCOA_RS29105, Bcoa_2316, GI:754205922, GeneID:11172592, WP_041818099.1	Bacillus_coagulans_36D1.RAST (77415/16/1)	gene	hypothetical protein
BCOA_RS29445	BCOA_RS29445, GI:754205935, GeneID:23676542, WP_041818111.1	Bacillus_coagulans_36D1.RAST (77415/16/1)	gene	hypothetical protein
BCOA_RS30300	BCOA_RS30300, GI:754205950, GeneID:23676551, WP_041818125.1	Bacillus_coagulans_36D1.RAST (77415/16/1)	gene	hypothetical protein
BCOA_RS30305	BCOA_RS30305, Bcoa_2528, GI:754205952, GeneID:11172802, WP_041818127.1	Bacillus_coagulans_36D1.RAST (77415/16/1)	gene	hypothetical protein
BCOA_RS31150	BCOA_RS31150, Bcoa_2697, GI:503863921, GeneID:11172970, WP_014097915.1	Bacillus_coagulans_36D1.RAST (77415/16/1)	gene	hypothetical protein
BCOA_RS31260	BCOA_RS31260, GI:754205974, GeneID:23676559, WP_041818147.1	Bacillus_coagulans_36D1.RAST (77415/16/1)	gene	hypothetical protein
BCOA_RS18565	BCOA_RS18565, Bcoa_0277, GI:503861667, GeneID:11173208, WP_014095661.1	Bacillus_coagulans_36D1.RAST (77415/16/1)	gene	hypothetical protein
BCOA_RS18610	BCOA_RS18610, GI:754205617, GeneID:23676369, WP_041817835.1	Bacillus_coagulans_36D1.RAST (77415/16/1)	gene	hypothetical protein
BCOA_RS32115	BCOA_RS32115, Bcoa_2896, GI:503864106, GeneID:11173825, WP_014098100.1	Bacillus_coagulans_36D1.RAST (77415/16/1)	gene	hypothetical protein
BCOA_RS32580	BCOA_RS32580, GI:918008941, GeneID:23676564, WP_052301527.1	Bacillus_coagulans_36D1.RAST (77415/16/1)	gene	hypothetical protein
BCOA_RS32595	BCOA_RS32595, GI:918008942, GeneID:23676565, WP_052301528.1	Bacillus_coagulans_36D1.RAST (77415/16/1)	gene	hypothetical protein
BCOA_RS18725	BCOA_RS18725, Bcoa_0310, GI:503861700, GeneID:11173241, WP_014095694.1	Bacillus_coagulans_36D1.RAST (77415/16/1)	gene	hypothetical protein
BCOA_RS18735	BCOA_RS18735, Bcoa_0312, GI:503861702, GeneID:11173243, WP_014095696.1	Bacillus_coagulans_36D1.RAST (77415/16/1)	gene	hypothetical protein
BCOA_RS33300	BCOA_RS33300, GI:754206007, GeneID:23676569, WP_041818176.1	Bacillus_coagulans_36D1.RAST (77415/16/1)	gene	hypothetical protein
BCOA_RS33380	BCOA_RS33380, GI:648412854, GeneID:23676571, WP_026104605.1	Bacillus_coagulans_36D1.RAST (77415/16/1)	gene	hypothetical protein
BCOA_RS33420	BCOA_RS33420, Bcoa_3159, GI:503864350, GeneID:11174085, WP_014098344.1	Bacillus_coagulans_36D1.RAST (77415/16/1)	gene	hypothetical protein
BCOA_RS34105	BCOA_RS34105, Bcoa_3299, GI:503625112, GeneID:11174225, WP_013859188.1	Bacillus_coagulans_36D1.RAST (77415/16/1)	gene	hypothetical protein
BCOA_RS19295	BCOA_RS19295, GI:516119648, GeneID:23676389, WP_017550228.1	Bacillus_coagulans_36D1.RAST (77415/16/1)	gene	hypothetical protein
BCOA_RS19705	BCOA_RS19705, GI:516121085, GeneID:23676392, WP_017551665.1	Bacillus_coagulans_36D1.RAST (77415/16/1)	gene	hypothetical protein
BCOA_RS19860	BCOA_RS19860, GI:737196759, GeneID:23676396, WP_035182258.1	Bacillus_coagulans_36D1.RAST (77415/16/1)	gene	hypothetical protein
BCOA_RS20010	BCOA_RS20010, GI:754205685, GeneID:23676400, WP_041817891.1	Bacillus_coagulans_36D1.RAST (77415/16/1)	gene	hypothetical protein
BCOA_RS20745	BCOA_RS20745, Bcoa_0698, GI:503624362, GeneID:11173627, WP_013858438.1	Bacillus_coagulans_36D1.RAST (77415/16/1)	gene	hypothetical protein
BCOA_RS20765	BCOA_RS20765, GI:754205703, GeneID:23676410, WP_041817906.1	Bacillus_coagulans_36D1.RAST (77415/16/1)	gene	hypothetical protein
BCOA_RS20800	BCOA_RS20800, Bcoa_0709, GI:503862081, GeneID:11173638, WP_014096075.1	Bacillus_coagulans_36D1.RAST (77415/16/1)	gene	hypothetical protein
BCOA_RS20875	BCOA_RS20875, Bcoa_0724, GI:503862096, GeneID:11173653, WP_014096090.1	Bacillus_coagulans_36D1.RAST (77415/16/1)	gene	hypothetical protein
BCOA_RS21210	BCOA_RS21210, Bcoa_0794, GI:503862163, GeneID:11174378, WP_014096157.1	Bacillus_coagulans_36D1.RAST (77415/16/1)	gene	hypothetical protein
BCOA_RS21325	BCOA_RS21325, Bcoa_0820, GI:503862187, GeneID:11174404, WP_014096181.1	Bacillus_coagulans_36D1.RAST (77415/16/1)	gene	hypothetical protein
BCOA_RS17605	BCOA_RS17605, GI:754205587, GeneID:23676357, WP_041817811.1	Bacillus_coagulans_36D1.RAST (77415/16/1)	gene	hypothetical protein
BCOA_RS21510	BCOA_RS21510, Bcoa_0861, GI:503862227, GeneID:11174445, WP_014096221.1	Bacillus_coagulans_36D1.RAST (77415/16/1)	gene	hypothetical protein
BCOA_RS21515	BCOA_RS21515, Bcoa_0863, GI:503862229, GeneID:11174447, WP_014096223.1	Bacillus_coagulans_36D1.RAST (77415/16/1)	gene	hypothetical protein
BCOA_RS21550	BCOA_RS21550, Bcoa_0870, GI:503862236, GeneID:11174454, WP_014096230.1	Bacillus_coagulans_36D1.RAST (77415/16/1)	gene	hypothetical protein
BCOA_RS21570	BCOA_RS21570, Bcoa_0874, GI:503862240, GeneID:11174458, WP_014096234.1	Bacillus_coagulans_36D1.RAST (77415/16/1)	gene	hypothetical protein
BCOA_RS21575	BCOA_RS21575, Bcoa_0875, GI:503862241, GeneID:11174459, WP_014096235.1	Bacillus_coagulans_36D1.RAST (77415/16/1)	gene	hypothetical protein
BCOA_RS21580	BCOA_RS21580, Bcoa_0876, GI:503862242, GeneID:11174460, WP_014096236.1	Bacillus_coagulans_36D1.RAST (77415/16/1)	gene	hypothetical protein
BCOA_RS21585	BCOA_RS21585, Bcoa_0877, GI:503862243, GeneID:11174461, WP_014096237.1	Bacillus_coagulans_36D1.RAST (77415/16/1)	gene	hypothetical protein
BCOA_RS21590	BCOA_RS21590, Bcoa_0878, GI:503862244, GeneID:11174462, WP_014096238.1	Bacillus_coagulans_36D1.RAST (77415/16/1)	gene	hypothetical protein
BCOA_RS21850	BCOA_RS21850, Bcoa_0927, GI:503862291, GeneID:11174511, WP_014096285.1	Bacillus_coagulans_36D1.RAST (77415/16/1)	gene	hypothetical protein
BF29_RS06135	BF29_1229, BF29_RS06135, GI:737194928, WP_035180547.1	Bacillus_coagulans_DSM_1___ATCC_7050_1.RAST (77415/21/1)	gene	hypothetical protein
BF29_RS06290	BF29_RS06290, GI:737190702, WP_035176350.1	Bacillus_coagulans_DSM_1___ATCC_7050_1.RAST (77415/21/1)	gene	hypothetical protein
BF29_RS06310	BF29_1261, BF29_RS06310, GI:656147274, WP_029142475.1	Bacillus_coagulans_DSM_1___ATCC_7050_1.RAST (77415/21/1)	gene	hypothetical protein
BF29_RS06375	BF29_1273, BF29_RS06375, GI:656147260, WP_029142466.1	Bacillus_coagulans_DSM_1___ATCC_7050_1.RAST (77415/21/1)	gene	hypothetical protein
BF29_RS06710	BF29_1342, BF29_RS06710, GI:916261474, WP_050996520.1	Bacillus_coagulans_DSM_1___ATCC_7050_1.RAST (77415/21/1)	gene	hypothetical protein
BF29_RS06725	BF29_1345, BF29_RS06725, GI:737195483, WP_035181085.1	Bacillus_coagulans_DSM_1___ATCC_7050_1.RAST (77415/21/1)	gene	hypothetical protein
BF29_RS06745	BF29_1349, BF29_RS06745, GI:755163607, WP_042512410.1	Bacillus_coagulans_DSM_1___ATCC_7050_1.RAST (77415/21/1)	gene	hypothetical protein
BF29_RS06755	BF29_1351, BF29_RS06755, GI:737194773, WP_035180395.1	Bacillus_coagulans_DSM_1___ATCC_7050_1.RAST (77415/21/1)	gene	hypothetical protein
BF29_RS06770	BF29_1354, BF29_RS06770, GI:755163609, WP_042512412.1	Bacillus_coagulans_DSM_1___ATCC_7050_1.RAST (77415/21/1)	gene	hypothetical protein
BF29_RS07400	BF29_RS07400, GI:755163611, WP_042512414.1	Bacillus_coagulans_DSM_1___ATCC_7050_1.RAST (77415/21/1)	gene	hypothetical protein
BF29_RS08085	BF29_1638, BF29_RS08085, GI:656145553, WP_029141830.1	Bacillus_coagulans_DSM_1___ATCC_7050_1.RAST (77415/21/1)	gene	hypothetical protein
BF29_RS08190	BF29_RS08190, GI:737195124, WP_035180738.1	Bacillus_coagulans_DSM_1___ATCC_7050_1.RAST (77415/21/1)	gene	hypothetical protein
BF29_RS08220	BF29_RS08220, GI:656149220, WP_029143119.1	Bacillus_coagulans_DSM_1___ATCC_7050_1.RAST (77415/21/1)	gene	hypothetical protein
BF29_RS08285	BF29_RS08285, GI:755163618, WP_042512421.1	Bacillus_coagulans_DSM_1___ATCC_7050_1.RAST (77415/21/1)	gene	hypothetical protein
BF29_RS08305	BF29_1683, BF29_RS08305, GI:503863133, WP_014097127.1	Bacillus_coagulans_DSM_1___ATCC_7050_1.RAST (77415/21/1)	gene	hypothetical protein
BF29_RS08445	BF29_1716, BF29_RS08445, GI:755163620, WP_042512423.1	Bacillus_coagulans_DSM_1___ATCC_7050_1.RAST (77415/21/1)	gene	hypothetical protein
BF29_RS08580	BF29_1746, BF29_RS08580, GI:656145598, WP_029141847.1	Bacillus_coagulans_DSM_1___ATCC_7050_1.RAST (77415/21/1)	gene	hypothetical protein
BF29_RS08840	BF29_1798, BF29_RS08840, GI:737195264, WP_035180873.1	Bacillus_coagulans_DSM_1___ATCC_7050_1.RAST (77415/21/1)	gene	hypothetical protein
BF29_RS08850	BF29_1800, BF29_RS08850, GI:737194773, WP_035180395.1	Bacillus_coagulans_DSM_1___ATCC_7050_1.RAST (77415/21/1)	gene	hypothetical protein
BF29_RS08865	BF29_1804, BF29_RS08865, GI:656149307, WP_029143135.1	Bacillus_coagulans_DSM_1___ATCC_7050_1.RAST (77415/21/1)	gene	hypothetical protein
BF29_RS08870	BF29_1805, BF29_RS08870, GI:737195199, WP_035180810.1	Bacillus_coagulans_DSM_1___ATCC_7050_1.RAST (77415/21/1)	gene	hypothetical protein
BF29_RS08875	BF29_RS08875, GI:737195201, WP_035180812.1	Bacillus_coagulans_DSM_1___ATCC_7050_1.RAST (77415/21/1)	gene	hypothetical protein
BF29_RS08930	BF29_1820, BF29_RS08930, GI:656149409, WP_029143153.1	Bacillus_coagulans_DSM_1___ATCC_7050_1.RAST (77415/21/1)	gene	hypothetical protein
BF29_RS08935	BF29_1821, BF29_RS08935, GI:656149412, WP_029143154.1	Bacillus_coagulans_DSM_1___ATCC_7050_1.RAST (77415/21/1)	gene	hypothetical protein
BF29_RS08940	BF29_RS08940, GI:656149415, WP_029143155.1	Bacillus_coagulans_DSM_1___ATCC_7050_1.RAST (77415/21/1)	gene	hypothetical protein
BF29_RS08945	BF29_1822, BF29_RS08945, GI:656149417, WP_029143156.1	Bacillus_coagulans_DSM_1___ATCC_7050_1.RAST (77415/21/1)	gene	hypothetical protein
BF29_RS08970	BF29_1828, BF29_RS08970, GI:656149402, WP_029143151.1	Bacillus_coagulans_DSM_1___ATCC_7050_1.RAST (77415/21/1)	gene	hypothetical protein
BF29_RS08980	BF29_RS08980, GI:755163627, WP_042512430.1	Bacillus_coagulans_DSM_1___ATCC_7050_1.RAST (77415/21/1)	gene	hypothetical protein
BF29_RS09260	BF29_RS09260, GI:737195434, WP_035181038.1	Bacillus_coagulans_DSM_1___ATCC_7050_1.RAST (77415/21/1)	gene	hypothetical protein
BF29_RS09295	BF29_RS09295, GI:656148731, WP_029142958.1	Bacillus_coagulans_DSM_1___ATCC_7050_1.RAST (77415/21/1)	gene	hypothetical protein
BF29_RS16990	BF29_RS16990, GI:656148790, WP_029142981.1	Bacillus_coagulans_DSM_1___ATCC_7050_1.RAST (77415/21/1)	gene	hypothetical protein
BF29_RS09595	BF29_RS09595, GI:755163631, WP_042512434.1	Bacillus_coagulans_DSM_1___ATCC_7050_1.RAST (77415/21/1)	gene	hypothetical protein
BF29_RS10075	BF29_2058, BF29_RS10075, GI:656149457, WP_029143164.1	Bacillus_coagulans_DSM_1___ATCC_7050_1.RAST (77415/21/1)	gene	hypothetical protein
BF29_RS10090	BF29_2062, BF29_RS10090, GI:656149457, WP_029143164.1	Bacillus_coagulans_DSM_1___ATCC_7050_1.RAST (77415/21/1)	gene	hypothetical protein
BF29_RS10390	BF29_2124, BF29_RS10390, GI:656149202, WP_029143115.1	Bacillus_coagulans_DSM_1___ATCC_7050_1.RAST (77415/21/1)	gene	hypothetical protein
BF29_RS10410	BF29_2128, BF29_RS10410, GI:658518840, WP_029713854.1	Bacillus_coagulans_DSM_1___ATCC_7050_1.RAST (77415/21/1)	gene	hypothetical protein
BF29_RS10555	BF29_RS10555, GI:755163637, WP_042512440.1	Bacillus_coagulans_DSM_1___ATCC_7050_1.RAST (77415/21/1)	gene	hypothetical protein
BF29_RS10630	BF29_2176, BF29_RS10630, GI:656147243, WP_029142460.1	Bacillus_coagulans_DSM_1___ATCC_7050_1.RAST (77415/21/1)	gene	hypothetical protein
BF29_RS10850	BF29_2226, BF29_RS10850, GI:737195264, WP_035180873.1	Bacillus_coagulans_DSM_1___ATCC_7050_1.RAST (77415/21/1)	gene	hypothetical protein
BF29_RS10860	BF29_2228, BF29_RS10860, GI:737194773, WP_035180395.1	Bacillus_coagulans_DSM_1___ATCC_7050_1.RAST (77415/21/1)	gene	hypothetical protein
BF29_RS10865	BF29_2229, BF29_RS10865, GI:737195288, WP_035180896.1	Bacillus_coagulans_DSM_1___ATCC_7050_1.RAST (77415/21/1)	gene	hypothetical protein
BF29_RS11280	BF29_RS11280, GI:656145686, WP_029141887.1	Bacillus_coagulans_DSM_1___ATCC_7050_1.RAST (77415/21/1)	gene	hypothetical protein
BF29_RS17005	BF29_2489, BF29_RS17005, GI:918421069, WP_052472245.1	Bacillus_coagulans_DSM_1___ATCC_7050_1.RAST (77415/21/1)	gene	hypothetical protein
BF29_RS12130	BF29_2490, BF29_RS12130, GI:656147991, WP_029142704.1	Bacillus_coagulans_DSM_1___ATCC_7050_1.RAST (77415/21/1)	gene	hypothetical protein
BF29_RS17010	BF29_2491, BF29_RS17010, GI:916261525, WP_050996571.1	Bacillus_coagulans_DSM_1___ATCC_7050_1.RAST (77415/21/1)	gene	hypothetical protein
BF29_RS12140	BF29_2492, BF29_RS12140, GI:656147996, WP_029142706.1	Bacillus_coagulans_DSM_1___ATCC_7050_1.RAST (77415/21/1)	gene	hypothetical protein
BF29_RS12150	BF29_2494, BF29_RS12150, GI:737190847, WP_035176495.1	Bacillus_coagulans_DSM_1___ATCC_7050_1.RAST (77415/21/1)	gene	hypothetical protein
BF29_RS12165	BF29_2498, BF29_RS12165, GI:656148006, WP_029142710.1	Bacillus_coagulans_DSM_1___ATCC_7050_1.RAST (77415/21/1)	gene	hypothetical protein
BF29_RS12170	BF29_2499, BF29_RS12170, GI:656148008, WP_029142711.1	Bacillus_coagulans_DSM_1___ATCC_7050_1.RAST (77415/21/1)	gene	hypothetical protein
BF29_RS12175	BF29_2500, BF29_RS12175, GI:658518852, WP_029713866.1	Bacillus_coagulans_DSM_1___ATCC_7050_1.RAST (77415/21/1)	gene	hypothetical protein
BF29_RS12200	BF29_2506, BF29_RS12200, GI:656148021, WP_029142717.1	Bacillus_coagulans_DSM_1___ATCC_7050_1.RAST (77415/21/1)	gene	hypothetical protein
BF29_RS12205	BF29_2508, BF29_RS12205, GI:656148023, WP_029142718.1	Bacillus_coagulans_DSM_1___ATCC_7050_1.RAST (77415/21/1)	gene	hypothetical protein
BF29_RS12215	BF29_2510, BF29_RS12215, GI:656148028, WP_029142720.1	Bacillus_coagulans_DSM_1___ATCC_7050_1.RAST (77415/21/1)	gene	hypothetical protein
BF29_RS12220	BF29_2511, BF29_RS12220, GI:656148030, WP_029142721.1	Bacillus_coagulans_DSM_1___ATCC_7050_1.RAST (77415/21/1)	gene	hypothetical protein
BF29_RS12225	BF29_2512, BF29_RS12225, GI:658518856, WP_029713870.1	Bacillus_coagulans_DSM_1___ATCC_7050_1.RAST (77415/21/1)	gene	hypothetical protein
BF29_RS12230	BF29_2516, BF29_RS12230, GI:656148033, WP_029142722.1	Bacillus_coagulans_DSM_1___ATCC_7050_1.RAST (77415/21/1)	gene	hypothetical protein
BF29_RS12245	BF29_2519, BF29_RS12245, GI:656148460, WP_029142864.1	Bacillus_coagulans_DSM_1___ATCC_7050_1.RAST (77415/21/1)	gene	hypothetical protein
BF29_RS12250	BF29_2520, BF29_RS12250, GI:656148458, WP_029142863.1	Bacillus_coagulans_DSM_1___ATCC_7050_1.RAST (77415/21/1)	gene	hypothetical protein
BF29_RS12255	BF29_2521, BF29_RS12255, GI:656148456, WP_029142862.1	Bacillus_coagulans_DSM_1___ATCC_7050_1.RAST (77415/21/1)	gene	hypothetical protein
BF29_RS12260	BF29_2522, BF29_RS12260, GI:656148453, WP_029142861.1	Bacillus_coagulans_DSM_1___ATCC_7050_1.RAST (77415/21/1)	gene	hypothetical protein
BF29_RS12275	BF29_2525, BF29_RS12275, GI:656148449, WP_029142859.1	Bacillus_coagulans_DSM_1___ATCC_7050_1.RAST (77415/21/1)	gene	hypothetical protein
BF29_RS12280	BF29_2526, BF29_RS12280, GI:656148446, WP_029142858.1	Bacillus_coagulans_DSM_1___ATCC_7050_1.RAST (77415/21/1)	gene	hypothetical protein
BF29_RS12295	BF29_2529, BF29_RS12295, GI:656148439, WP_029142855.1	Bacillus_coagulans_DSM_1___ATCC_7050_1.RAST (77415/21/1)	gene	hypothetical protein
BF29_RS12305	BF29_2534, BF29_RS12305, GI:916261488, WP_050996534.1	Bacillus_coagulans_DSM_1___ATCC_7050_1.RAST (77415/21/1)	gene	hypothetical protein
BF29_RS12315	BF29_2536, BF29_RS12315, GI:656148433, WP_029142851.1	Bacillus_coagulans_DSM_1___ATCC_7050_1.RAST (77415/21/1)	gene	hypothetical protein
BF29_RS17025	BF29_2537, BF29_RS17025, GI:656148431, WP_029142850.1	Bacillus_coagulans_DSM_1___ATCC_7050_1.RAST (77415/21/1)	gene	hypothetical protein
BF29_RS12325	BF29_2538, BF29_RS12325, GI:737190999, WP_035176647.1	Bacillus_coagulans_DSM_1___ATCC_7050_1.RAST (77415/21/1)	gene	hypothetical protein
BF29_RS12330	BF29_2539, BF29_RS12330, GI:656148428, WP_029142848.1	Bacillus_coagulans_DSM_1___ATCC_7050_1.RAST (77415/21/1)	gene	hypothetical protein
BF29_RS12335	BF29_2540, BF29_RS12335, GI:656148426, WP_029142847.1	Bacillus_coagulans_DSM_1___ATCC_7050_1.RAST (77415/21/1)	gene	hypothetical protein
BF29_RS12340	BF29_2541, BF29_RS12340, GI:916261486, WP_050996532.1	Bacillus_coagulans_DSM_1___ATCC_7050_1.RAST (77415/21/1)	gene	hypothetical protein
BF29_RS12350	BF29_2544, BF29_RS12350, GI:656148370, WP_029142824.1	Bacillus_coagulans_DSM_1___ATCC_7050_1.RAST (77415/21/1)	gene	hypothetical protein
BF29_RS12365	BF29_2547, BF29_RS12365, GI:656148379, WP_029142827.1	Bacillus_coagulans_DSM_1___ATCC_7050_1.RAST (77415/21/1)	gene	hypothetical protein
BF29_RS12375	BF29_2549, BF29_RS12375, GI:656148384, WP_029142829.1	Bacillus_coagulans_DSM_1___ATCC_7050_1.RAST (77415/21/1)	gene	hypothetical protein
BF29_RS12385	BF29_2551, BF29_RS12385, GI:656148388, WP_029142831.1	Bacillus_coagulans_DSM_1___ATCC_7050_1.RAST (77415/21/1)	gene	hypothetical protein
BF29_RS12390	BF29_2552, BF29_RS12390, GI:656148389, WP_029142832.1	Bacillus_coagulans_DSM_1___ATCC_7050_1.RAST (77415/21/1)	gene	hypothetical protein
BF29_RS12400	BF29_2554, BF29_RS12400, GI:755163642, WP_042512445.1	Bacillus_coagulans_DSM_1___ATCC_7050_1.RAST (77415/21/1)	gene	hypothetical protein
BF29_RS12405	BF29_2555, BF29_RS12405, GI:656149380, WP_029143147.1	Bacillus_coagulans_DSM_1___ATCC_7050_1.RAST (77415/21/1)	gene	hypothetical protein
BF29_RS12420	BF29_2558, BF29_RS12420, GI:755163643, WP_042512446.1	Bacillus_coagulans_DSM_1___ATCC_7050_1.RAST (77415/21/1)	gene	hypothetical protein
BF29_RS12425	BF29_2559, BF29_RS12425, GI:656149120, WP_029143088.1	Bacillus_coagulans_DSM_1___ATCC_7050_1.RAST (77415/21/1)	gene	hypothetical protein
BF29_RS12430	BF29_2560, BF29_RS12430, GI:656149110, WP_029143087.1	Bacillus_coagulans_DSM_1___ATCC_7050_1.RAST (77415/21/1)	gene	hypothetical protein
BF29_RS12435	BF29_2561, BF29_RS12435, GI:656149100, WP_029143086.1	Bacillus_coagulans_DSM_1___ATCC_7050_1.RAST (77415/21/1)	gene	hypothetical protein
BF29_RS17030	BF29_2565, BF29_RS17030, GI:918421069, WP_052472245.1	Bacillus_coagulans_DSM_1___ATCC_7050_1.RAST (77415/21/1)	gene	hypothetical protein
BF29_RS12460	BF29_2566, BF29_RS12460, GI:656147991, WP_029142704.1	Bacillus_coagulans_DSM_1___ATCC_7050_1.RAST (77415/21/1)	gene	hypothetical protein
BF29_RS17035	BF29_2567, BF29_RS17035, GI:916261525, WP_050996571.1	Bacillus_coagulans_DSM_1___ATCC_7050_1.RAST (77415/21/1)	gene	hypothetical protein
BF29_RS12470	BF29_2568, BF29_RS12470, GI:656147996, WP_029142706.1	Bacillus_coagulans_DSM_1___ATCC_7050_1.RAST (77415/21/1)	gene	hypothetical protein
BF29_RS12480	BF29_2570, BF29_RS12480, GI:737190847, WP_035176495.1	Bacillus_coagulans_DSM_1___ATCC_7050_1.RAST (77415/21/1)	gene	hypothetical protein
BF29_RS12495	BF29_2574, BF29_RS12495, GI:656148006, WP_029142710.1	Bacillus_coagulans_DSM_1___ATCC_7050_1.RAST (77415/21/1)	gene	hypothetical protein
BF29_RS12500	BF29_2575, BF29_RS12500, GI:656148008, WP_029142711.1	Bacillus_coagulans_DSM_1___ATCC_7050_1.RAST (77415/21/1)	gene	hypothetical protein
BF29_RS12505	BF29_2576, BF29_RS12505, GI:658518852, WP_029713866.1	Bacillus_coagulans_DSM_1___ATCC_7050_1.RAST (77415/21/1)	gene	hypothetical protein
BF29_RS12530	BF29_2582, BF29_RS12530, GI:656148021, WP_029142717.1	Bacillus_coagulans_DSM_1___ATCC_7050_1.RAST (77415/21/1)	gene	hypothetical protein
BF29_RS12535	BF29_2584, BF29_RS12535, GI:656148023, WP_029142718.1	Bacillus_coagulans_DSM_1___ATCC_7050_1.RAST (77415/21/1)	gene	hypothetical protein
BF29_RS12545	BF29_2586, BF29_RS12545, GI:656148028, WP_029142720.1	Bacillus_coagulans_DSM_1___ATCC_7050_1.RAST (77415/21/1)	gene	hypothetical protein
BF29_RS12550	BF29_2587, BF29_RS12550, GI:656148030, WP_029142721.1	Bacillus_coagulans_DSM_1___ATCC_7050_1.RAST (77415/21/1)	gene	hypothetical protein
BF29_RS12555	BF29_2588, BF29_RS12555, GI:658518856, WP_029713870.1	Bacillus_coagulans_DSM_1___ATCC_7050_1.RAST (77415/21/1)	gene	hypothetical protein
BF29_RS12560	BF29_2592, BF29_RS12560, GI:656148033, WP_029142722.1	Bacillus_coagulans_DSM_1___ATCC_7050_1.RAST (77415/21/1)	gene	hypothetical protein
BF29_RS12575	BF29_2596, BF29_RS12575, GI:755163644, WP_042512447.1	Bacillus_coagulans_DSM_1___ATCC_7050_1.RAST (77415/21/1)	gene	hypothetical protein
BF29_RS12580	BF29_2597, BF29_RS12580, GI:755163645, WP_042512448.1	Bacillus_coagulans_DSM_1___ATCC_7050_1.RAST (77415/21/1)	gene	hypothetical protein
BF29_RS12585	BF29_RS12585, GI:755163646, WP_042512449.1	Bacillus_coagulans_DSM_1___ATCC_7050_1.RAST (77415/21/1)	gene	hypothetical protein
BF29_RS12590	BF29_2598, BF29_RS12590, GI:656148456, WP_029142862.1	Bacillus_coagulans_DSM_1___ATCC_7050_1.RAST (77415/21/1)	gene	hypothetical protein
BF29_RS12595	BF29_2599, BF29_RS12595, GI:656148453, WP_029142861.1	Bacillus_coagulans_DSM_1___ATCC_7050_1.RAST (77415/21/1)	gene	hypothetical protein
BF29_RS12610	BF29_2602, BF29_RS12610, GI:656148449, WP_029142859.1	Bacillus_coagulans_DSM_1___ATCC_7050_1.RAST (77415/21/1)	gene	hypothetical protein
BF29_RS12615	BF29_2603, BF29_RS12615, GI:656148446, WP_029142858.1	Bacillus_coagulans_DSM_1___ATCC_7050_1.RAST (77415/21/1)	gene	hypothetical protein
BF29_RS12630	BF29_2606, BF29_RS12630, GI:656148439, WP_029142855.1	Bacillus_coagulans_DSM_1___ATCC_7050_1.RAST (77415/21/1)	gene	hypothetical protein
BF29_RS12645	BF29_2611, BF29_RS12645, GI:916261488, WP_050996534.1	Bacillus_coagulans_DSM_1___ATCC_7050_1.RAST (77415/21/1)	gene	hypothetical protein
BF29_RS12655	BF29_2613, BF29_RS12655, GI:656148433, WP_029142851.1	Bacillus_coagulans_DSM_1___ATCC_7050_1.RAST (77415/21/1)	gene	hypothetical protein
BF29_RS17045	BF29_2614, BF29_RS17045, GI:656148431, WP_029142850.1	Bacillus_coagulans_DSM_1___ATCC_7050_1.RAST (77415/21/1)	gene	hypothetical protein
BF29_RS12665	BF29_2615, BF29_RS12665, GI:737190999, WP_035176647.1	Bacillus_coagulans_DSM_1___ATCC_7050_1.RAST (77415/21/1)	gene	hypothetical protein
BF29_RS12670	BF29_2616, BF29_RS12670, GI:656148428, WP_029142848.1	Bacillus_coagulans_DSM_1___ATCC_7050_1.RAST (77415/21/1)	gene	hypothetical protein
BF29_RS12675	BF29_2617, BF29_RS12675, GI:656148426, WP_029142847.1	Bacillus_coagulans_DSM_1___ATCC_7050_1.RAST (77415/21/1)	gene	hypothetical protein
BF29_RS12680	BF29_2618, BF29_RS12680, GI:916261486, WP_050996532.1	Bacillus_coagulans_DSM_1___ATCC_7050_1.RAST (77415/21/1)	gene	hypothetical protein
BF29_RS12690	BF29_2620, BF29_RS12690, GI:656148370, WP_029142824.1	Bacillus_coagulans_DSM_1___ATCC_7050_1.RAST (77415/21/1)	gene	hypothetical protein
BF29_RS12705	BF29_2623, BF29_RS12705, GI:656148379, WP_029142827.1	Bacillus_coagulans_DSM_1___ATCC_7050_1.RAST (77415/21/1)	gene	hypothetical protein
BF29_RS12715	BF29_2625, BF29_RS12715, GI:656148384, WP_029142829.1	Bacillus_coagulans_DSM_1___ATCC_7050_1.RAST (77415/21/1)	gene	hypothetical protein
BF29_RS12725	BF29_2627, BF29_RS12725, GI:656148388, WP_029142831.1	Bacillus_coagulans_DSM_1___ATCC_7050_1.RAST (77415/21/1)	gene	hypothetical protein
BF29_RS12730	BF29_2628, BF29_RS12730, GI:656148389, WP_029142832.1	Bacillus_coagulans_DSM_1___ATCC_7050_1.RAST (77415/21/1)	gene	hypothetical protein
BF29_RS12740	BF29_2630, BF29_RS12740, GI:755163642, WP_042512445.1	Bacillus_coagulans_DSM_1___ATCC_7050_1.RAST (77415/21/1)	gene	hypothetical protein
BF29_RS12745	BF29_2631, BF29_RS12745, GI:656149380, WP_029143147.1	Bacillus_coagulans_DSM_1___ATCC_7050_1.RAST (77415/21/1)	gene	hypothetical protein
BF29_RS12760	BF29_2634, BF29_RS12760, GI:755163643, WP_042512446.1	Bacillus_coagulans_DSM_1___ATCC_7050_1.RAST (77415/21/1)	gene	hypothetical protein
BF29_RS12765	BF29_2635, BF29_RS12765, GI:656149120, WP_029143088.1	Bacillus_coagulans_DSM_1___ATCC_7050_1.RAST (77415/21/1)	gene	hypothetical protein
BF29_RS12770	BF29_2636, BF29_RS12770, GI:656149110, WP_029143087.1	Bacillus_coagulans_DSM_1___ATCC_7050_1.RAST (77415/21/1)	gene	hypothetical protein
BF29_RS12775	BF29_2637, BF29_RS12775, GI:656149100, WP_029143086.1	Bacillus_coagulans_DSM_1___ATCC_7050_1.RAST (77415/21/1)	gene	hypothetical protein
BF29_RS13025	BF29_RS13025, GI:755163647, WP_042512450.1	Bacillus_coagulans_DSM_1___ATCC_7050_1.RAST (77415/21/1)	gene	hypothetical protein
BF29_RS13145	BF29_2715, BF29_RS13145, GI:755163648, WP_042512451.1	Bacillus_coagulans_DSM_1___ATCC_7050_1.RAST (77415/21/1)	gene	hypothetical protein
BF29_RS13150	BF29_2717, BF29_RS13150, GI:737195264, WP_035180873.1	Bacillus_coagulans_DSM_1___ATCC_7050_1.RAST (77415/21/1)	gene	hypothetical protein
BF29_RS13160	BF29_2720, BF29_RS13160, GI:737194773, WP_035180395.1	Bacillus_coagulans_DSM_1___ATCC_7050_1.RAST (77415/21/1)	gene	hypothetical protein
BF29_RS13315	BF29_RS13315, GI:737190976, WP_035176624.1	Bacillus_coagulans_DSM_1___ATCC_7050_1.RAST (77415/21/1)	gene	hypothetical protein
BF29_RS13330	BF29_RS13330, GI:656148322, WP_029142806.1	Bacillus_coagulans_DSM_1___ATCC_7050_1.RAST (77415/21/1)	gene	hypothetical protein
BF29_RS13465	BF29_RS13465, GI:656146491, WP_029142181.1	Bacillus_coagulans_DSM_1___ATCC_7050_1.RAST (77415/21/1)	gene	hypothetical protein
BF29_RS13510	BF29_RS13510, GI:755163652, WP_042512455.1	Bacillus_coagulans_DSM_1___ATCC_7050_1.RAST (77415/21/1)	gene	hypothetical protein
BF29_RS13565	BF29_RS13565, GI:656146464, WP_029142170.1	Bacillus_coagulans_DSM_1___ATCC_7050_1.RAST (77415/21/1)	gene	hypothetical protein
BF29_RS13725	BF29_RS13725, GI:656148595, WP_029142907.1	Bacillus_coagulans_DSM_1___ATCC_7050_1.RAST (77415/21/1)	gene	hypothetical protein
BF29_RS13770	BF29_RS13770, GI:656148584, WP_029142901.1	Bacillus_coagulans_DSM_1___ATCC_7050_1.RAST (77415/21/1)	gene	hypothetical protein
BF29_RS17070	BF29_2852, BF29_RS17070, GI:656147367, WP_029142501.1	Bacillus_coagulans_DSM_1___ATCC_7050_1.RAST (77415/21/1)	gene	hypothetical protein
BF29_RS13870	BF29_2853, BF29_RS13870, GI:656147369, WP_029142502.1	Bacillus_coagulans_DSM_1___ATCC_7050_1.RAST (77415/21/1)	gene	hypothetical protein
BF29_RS13885	BF29_2856, BF29_RS13885, GI:656147376, WP_029142505.1	Bacillus_coagulans_DSM_1___ATCC_7050_1.RAST (77415/21/1)	gene	hypothetical protein
BF29_RS14015	BF29_2889, BF29_RS14015, GI:755163656, WP_042512459.1	Bacillus_coagulans_DSM_1___ATCC_7050_1.RAST (77415/21/1)	gene	hypothetical protein
BF29_RS14075	BF29_2901, BF29_RS14075, GI:755163658, WP_042512461.1	Bacillus_coagulans_DSM_1___ATCC_7050_1.RAST (77415/21/1)	gene	hypothetical protein
BF29_RS14080	BF29_2902, BF29_RS14080, GI:656149039, WP_029143065.1	Bacillus_coagulans_DSM_1___ATCC_7050_1.RAST (77415/21/1)	gene	hypothetical protein
BF29_RS14105	BF29_2907, BF29_RS14105, GI:656149213, WP_029143117.1	Bacillus_coagulans_DSM_1___ATCC_7050_1.RAST (77415/21/1)	gene	hypothetical protein
BF29_RS14125	BF29_2911, BF29_RS14125, GI:755163660, WP_042512463.1	Bacillus_coagulans_DSM_1___ATCC_7050_1.RAST (77415/21/1)	gene	hypothetical protein
BF29_RS01325	BF29_RS01325, GI:656146765, WP_029142283.1	Bacillus_coagulans_DSM_1___ATCC_7050_1.RAST (77415/21/1)	gene	hypothetical protein
BF29_RS14170	BF29_RS14170, GI:658518897, WP_029713911.1	Bacillus_coagulans_DSM_1___ATCC_7050_1.RAST (77415/21/1)	gene	hypothetical protein
BF29_RS14210	BF29_2931, BF29_RS14210, GI:656146992, WP_029142379.1	Bacillus_coagulans_DSM_1___ATCC_7050_1.RAST (77415/21/1)	gene	hypothetical protein
BF29_RS01335	BF29_259, BF29_RS01335, GI:656146762, WP_029142282.1	Bacillus_coagulans_DSM_1___ATCC_7050_1.RAST (77415/21/1)	gene	hypothetical protein
BF29_RS14335	BF29_2957, BF29_RS14335, GI:656149364, WP_029143144.1	Bacillus_coagulans_DSM_1___ATCC_7050_1.RAST (77415/21/1)	gene	hypothetical protein
BF29_RS14340	BF29_2958, BF29_RS14340, GI:656149366, WP_029143145.1	Bacillus_coagulans_DSM_1___ATCC_7050_1.RAST (77415/21/1)	gene	hypothetical protein
BF29_RS14380	BF29_RS14380, GI:658518857, WP_029713871.1	Bacillus_coagulans_DSM_1___ATCC_7050_1.RAST (77415/21/1)	gene	hypothetical protein
BF29_RS14430	BF29_2977, BF29_RS14430, GI:737195264, WP_035180873.1	Bacillus_coagulans_DSM_1___ATCC_7050_1.RAST (77415/21/1)	gene	hypothetical protein
BF29_RS14440	BF29_2979, BF29_RS14440, GI:737194773, WP_035180395.1	Bacillus_coagulans_DSM_1___ATCC_7050_1.RAST (77415/21/1)	gene	hypothetical protein
BF29_RS14475	BF29_2986, BF29_RS14475, GI:503862081, WP_014096075.1	Bacillus_coagulans_DSM_1___ATCC_7050_1.RAST (77415/21/1)	gene	hypothetical protein
BF29_RS14520	BF29_2995, BF29_RS14520, GI:503624362, WP_013858438.1	Bacillus_coagulans_DSM_1___ATCC_7050_1.RAST (77415/21/1)	gene	hypothetical protein
BF29_RS15070	BF29_3105, BF29_RS15070, GI:656147915, WP_029142687.1	Bacillus_coagulans_DSM_1___ATCC_7050_1.RAST (77415/21/1)	gene	hypothetical protein
BF29_RS15325	BF29_RS15325, GI:656148069, WP_029142733.1	Bacillus_coagulans_DSM_1___ATCC_7050_1.RAST (77415/21/1)	gene	hypothetical protein
BF29_RS15475	BF29_3188, BF29_RS15475, GI:737195264, WP_035180873.1	Bacillus_coagulans_DSM_1___ATCC_7050_1.RAST (77415/21/1)	gene	hypothetical protein
BF29_RS15485	BF29_3190, BF29_RS15485, GI:737194773, WP_035180395.1	Bacillus_coagulans_DSM_1___ATCC_7050_1.RAST (77415/21/1)	gene	hypothetical protein
BF29_RS15760	BF29_3249, BF29_RS15760, GI:755163670, WP_042512473.1	Bacillus_coagulans_DSM_1___ATCC_7050_1.RAST (77415/21/1)	gene	hypothetical protein
BF29_RS15830	BF29_RS15830, GI:755163671, WP_042512474.1	Bacillus_coagulans_DSM_1___ATCC_7050_1.RAST (77415/21/1)	gene	hypothetical protein
BF29_RS16000	BF29_3295, BF29_RS16000, GI:516119648, WP_017550228.1	Bacillus_coagulans_DSM_1___ATCC_7050_1.RAST (77415/21/1)	gene	hypothetical protein
BF29_RS16050	BF29_RS16050, GI:656145352, WP_029141743.1	Bacillus_coagulans_DSM_1___ATCC_7050_1.RAST (77415/21/1)	gene	hypothetical protein
BF29_RS16565	BF29_RS16565, GI:656145448, WP_029141785.1	Bacillus_coagulans_DSM_1___ATCC_7050_1.RAST (77415/21/1)	gene	hypothetical protein
BF29_RS16690	BF29_RS16690, GI:755163675, WP_042512478.1	Bacillus_coagulans_DSM_1___ATCC_7050_1.RAST (77415/21/1)	gene	hypothetical protein
BF29_RS01950	BF29_383, BF29_RS01950, GI:656144938, WP_029141592.1	Bacillus_coagulans_DSM_1___ATCC_7050_1.RAST (77415/21/1)	gene	hypothetical protein
BF29_RS01970	BF29_RS01970, GI:656144930, WP_029141589.1	Bacillus_coagulans_DSM_1___ATCC_7050_1.RAST (77415/21/1)	gene	hypothetical protein
BF29_RS02090	BF29_410, BF29_RS02090, GI:656148141, WP_029142757.1	Bacillus_coagulans_DSM_1___ATCC_7050_1.RAST (77415/21/1)	gene	hypothetical protein
BF29_RS02285	BF29_449, BF29_RS02285, GI:656148985, WP_029143046.1	Bacillus_coagulans_DSM_1___ATCC_7050_1.RAST (77415/21/1)	gene	hypothetical protein
BF29_RS02380	BF29_472, BF29_RS02380, GI:737195264, WP_035180873.1	Bacillus_coagulans_DSM_1___ATCC_7050_1.RAST (77415/21/1)	gene	hypothetical protein
BF29_RS02390	BF29_474, BF29_RS02390, GI:737194773, WP_035180395.1	Bacillus_coagulans_DSM_1___ATCC_7050_1.RAST (77415/21/1)	gene	hypothetical protein
BF29_RS03365	BF29_671, BF29_RS03365, GI:503625493, WP_013859569.1	Bacillus_coagulans_DSM_1___ATCC_7050_1.RAST (77415/21/1)	gene	hypothetical protein
BF29_RS16955	BF29_RS16955, GI:918421063, WP_052472239.1	Bacillus_coagulans_DSM_1___ATCC_7050_1.RAST (77415/21/1)	gene	hypothetical protein
BF29_RS16960	BF29_865, BF29_RS16960, GI:656148608, WP_029142909.1	Bacillus_coagulans_DSM_1___ATCC_7050_1.RAST (77415/21/1)	gene	hypothetical protein
BF29_RS16965	BF29_RS16965, GI:656148611, WP_029142910.1	Bacillus_coagulans_DSM_1___ATCC_7050_1.RAST (77415/21/1)	gene	hypothetical protein
BF29_RS04355	BF29_873, BF29_RS04355, GI:656148626, WP_029142918.1	Bacillus_coagulans_DSM_1___ATCC_7050_1.RAST (77415/21/1)	gene	hypothetical protein
BF29_RS04365	BF29_875, BF29_RS04365, GI:656148631, WP_029142920.1	Bacillus_coagulans_DSM_1___ATCC_7050_1.RAST (77415/21/1)	gene	hypothetical protein
BF29_RS16970	BF29_876, BF29_RS16970, GI:656148634, WP_029142921.1	Bacillus_coagulans_DSM_1___ATCC_7050_1.RAST (77415/21/1)	gene	hypothetical protein
BF29_RS04410	BF29_884, BF29_RS04410, GI:916261469, WP_050996515.1	Bacillus_coagulans_DSM_1___ATCC_7050_1.RAST (77415/21/1)	gene	hypothetical protein
BF29_RS00505	BF29_RS00505, GI:656146779, WP_029142287.1	Bacillus_coagulans_DSM_1___ATCC_7050_1.RAST (77415/21/1)	gene	hypothetical protein
C893_RS0100110	C893_RS0100110, GI:516121775, WP_017552355.1	Bacillus_coagulans_H-1.RAST (77415/22/1)	gene	hypothetical protein
C893_RS0100370	C893_RS0100370, GI:516121807, WP_017552387.1	Bacillus_coagulans_H-1.RAST (77415/22/1)	gene	hypothetical protein
C893_RS0101150	C893_RS0101150, GI:648412958, WP_026104709.1	Bacillus_coagulans_H-1.RAST (77415/22/1)	gene	hypothetical protein
C893_RS0101425	C893_RS0101425, GI:516121969, WP_017552549.1	Bacillus_coagulans_H-1.RAST (77415/22/1)	gene	hypothetical protein
C893_RS0101430	C893_RS0101430, GI:516121970, WP_017552550.1	Bacillus_coagulans_H-1.RAST (77415/22/1)	gene	hypothetical protein
C893_RS17415	C893_RS17415, GI:916299629, WP_051034675.1	Bacillus_coagulans_H-1.RAST (77415/22/1)	gene	hypothetical protein
C893_RS0102675	C893_RS0102675, GI:516122169, WP_017552749.1	Bacillus_coagulans_H-1.RAST (77415/22/1)	gene	hypothetical protein
C893_RS0102765	C893_RS0102765, GI:516119648, WP_017550228.1	Bacillus_coagulans_H-1.RAST (77415/22/1)	gene	hypothetical protein
C893_RS0102855	C893_RS0102855, GI:757631955, WP_042871771.1	Bacillus_coagulans_H-1.RAST (77415/22/1)	gene	hypothetical protein
C893_RS0102965	C893_RS0102965, GI:516122210, WP_017552790.1	Bacillus_coagulans_H-1.RAST (77415/22/1)	gene	hypothetical protein
C893_RS0103380	C893_RS0103380, GI:516122279, WP_017552859.1	Bacillus_coagulans_H-1.RAST (77415/22/1)	gene	hypothetical protein
C893_RS17505	C893_RS17505, GI:516122339, WP_017552919.1	Bacillus_coagulans_H-1.RAST (77415/22/1)	gene	hypothetical protein
C893_RS0104055	C893_RS0104055, GI:516122386, WP_017552966.1	Bacillus_coagulans_H-1.RAST (77415/22/1)	gene	hypothetical protein
C893_RS17580	C893_RS17580, GI:757632228, WP_042872040.1	Bacillus_coagulans_H-1.RAST (77415/22/1)	gene	hypothetical protein
C893_RS0105150	C893_RS0105150, GI:516122538, WP_017553118.1	Bacillus_coagulans_H-1.RAST (77415/22/1)	gene	hypothetical protein
C893_RS0105175	C893_RS0105175, GI:516122543, WP_017553123.1	Bacillus_coagulans_H-1.RAST (77415/22/1)	gene	hypothetical protein
C893_RS0105205	C893_RS0105205, GI:516122549, WP_017553129.1	Bacillus_coagulans_H-1.RAST (77415/22/1)	gene	hypothetical protein
C893_RS17620	C893_RS17620, GI:916299639, WP_051034685.1	Bacillus_coagulans_H-1.RAST (77415/22/1)	gene	hypothetical protein
C893_RS17625	C893_RS17625, GI:757632304, WP_042872116.1	Bacillus_coagulans_H-1.RAST (77415/22/1)	gene	hypothetical protein
C893_RS0105250	C893_RS0105250, GI:516122557, WP_017553137.1	Bacillus_coagulans_H-1.RAST (77415/22/1)	gene	hypothetical protein
C893_RS0105415	C893_RS0105415, GI:516122579, WP_017553159.1	Bacillus_coagulans_H-1.RAST (77415/22/1)	gene	hypothetical protein
C893_RS18575	C893_RS18575, GI:516122723, WP_017553303.1	Bacillus_coagulans_H-1.RAST (77415/22/1)	gene	hypothetical protein
C893_RS0107685	C893_RS0107685, GI:516122920, WP_017553500.1	Bacillus_coagulans_H-1.RAST (77415/22/1)	gene	hypothetical protein
C893_RS0107740	C893_RS0107740, GI:516122925, WP_017553505.1	Bacillus_coagulans_H-1.RAST (77415/22/1)	gene	hypothetical protein
C893_RS0107745	C893_RS0107745, GI:516122926, WP_017553506.1	Bacillus_coagulans_H-1.RAST (77415/22/1)	gene	hypothetical protein
C893_RS0107750	C893_RS0107750, GI:516122927, WP_017553507.1	Bacillus_coagulans_H-1.RAST (77415/22/1)	gene	hypothetical protein
C893_RS0107755	C893_RS0107755, GI:516122928, WP_017553508.1	Bacillus_coagulans_H-1.RAST (77415/22/1)	gene	hypothetical protein
C893_RS0107835	C893_RS0107835, GI:648413045, WP_026104796.1	Bacillus_coagulans_H-1.RAST (77415/22/1)	gene	hypothetical protein
C893_RS0108245	C893_RS0108245, GI:516122989, WP_017553569.1	Bacillus_coagulans_H-1.RAST (77415/22/1)	gene	hypothetical protein
C893_RS17900	C893_RS17900, GI:516122991, WP_017553571.1	Bacillus_coagulans_H-1.RAST (77415/22/1)	gene	hypothetical protein
C893_RS0108280	C893_RS0108280, GI:516122995, WP_017553575.1	Bacillus_coagulans_H-1.RAST (77415/22/1)	gene	hypothetical protein
C893_RS0108295	C893_RS0108295, GI:516122998, WP_017553578.1	Bacillus_coagulans_H-1.RAST (77415/22/1)	gene	hypothetical protein
C893_RS0108300	C893_RS0108300, GI:516122999, WP_017553579.1	Bacillus_coagulans_H-1.RAST (77415/22/1)	gene	hypothetical protein
C893_RS0108305	C893_RS0108305, GI:516123000, WP_017553580.1	Bacillus_coagulans_H-1.RAST (77415/22/1)	gene	hypothetical protein
C893_RS0108325	C893_RS0108325, GI:516123003, WP_017553583.1	Bacillus_coagulans_H-1.RAST (77415/22/1)	gene	hypothetical protein
C893_RS0108335	C893_RS0108335, GI:516123005, WP_017553585.1	Bacillus_coagulans_H-1.RAST (77415/22/1)	gene	hypothetical protein
C893_RS0108340	C893_RS0108340, GI:516123006, WP_017553586.1	Bacillus_coagulans_H-1.RAST (77415/22/1)	gene	hypothetical protein
C893_RS0108630	C893_RS0108630, GI:503625493, WP_013859569.1	Bacillus_coagulans_H-1.RAST (77415/22/1)	gene	hypothetical protein
C893_RS0108830	C893_RS0108830, GI:516123078, WP_017553658.1	Bacillus_coagulans_H-1.RAST (77415/22/1)	gene	hypothetical protein
C893_RS0108860	C893_RS0108860, GI:516123083, WP_017553663.1	Bacillus_coagulans_H-1.RAST (77415/22/1)	gene	hypothetical protein
C893_RS0109235	C893_RS0109235, GI:516123137, WP_017553717.1	Bacillus_coagulans_H-1.RAST (77415/22/1)	gene	hypothetical protein
C893_RS17980	C893_RS17980, GI:516123193, WP_017553773.1	Bacillus_coagulans_H-1.RAST (77415/22/1)	gene	hypothetical protein
C893_RS0110185	C893_RS0110185, GI:516123283, WP_017553863.1	Bacillus_coagulans_H-1.RAST (77415/22/1)	gene	hypothetical protein
C893_RS0110195	C893_RS0110195, GI:648413067, WP_026104818.1	Bacillus_coagulans_H-1.RAST (77415/22/1)	gene	hypothetical protein
C893_RS0110430	C893_RS0110430, GI:516123323, WP_017553903.1	Bacillus_coagulans_H-1.RAST (77415/22/1)	gene	hypothetical protein
C893_RS0110570	C893_RS0110570, GI:516123349, WP_017553929.1	Bacillus_coagulans_H-1.RAST (77415/22/1)	gene	hypothetical protein
C893_RS0110630	C893_RS0110630, GI:648413077, WP_026104828.1	Bacillus_coagulans_H-1.RAST (77415/22/1)	gene	hypothetical protein
C893_RS0111510	C893_RS0111510, GI:516123458, WP_017554038.1	Bacillus_coagulans_H-1.RAST (77415/22/1)	gene	hypothetical protein
C893_RS0111570	C893_RS0111570, GI:516123467, WP_017554047.1	Bacillus_coagulans_H-1.RAST (77415/22/1)	gene	hypothetical protein
C893_RS0111610	C893_RS0111610, GI:516123473, WP_017554053.1	Bacillus_coagulans_H-1.RAST (77415/22/1)	gene	hypothetical protein
C893_RS0111865	C893_RS0111865, GI:516123512, WP_017554092.1	Bacillus_coagulans_H-1.RAST (77415/22/1)	gene	hypothetical protein
C893_RS0112075	C893_RS0112075, GI:516123550, WP_017554130.1	Bacillus_coagulans_H-1.RAST (77415/22/1)	gene	hypothetical protein
C893_RS0112080	C893_RS0112080, GI:516123551, WP_017554131.1	Bacillus_coagulans_H-1.RAST (77415/22/1)	gene	hypothetical protein
C893_RS0112235	C893_RS0112235, GI:516123573, WP_017554153.1	Bacillus_coagulans_H-1.RAST (77415/22/1)	gene	hypothetical protein
C893_RS0112295	C893_RS0112295, GI:516123581, WP_017554161.1	Bacillus_coagulans_H-1.RAST (77415/22/1)	gene	hypothetical protein
C893_RS0113115	C893_RS0113115, GI:516123692, WP_017554272.1	Bacillus_coagulans_H-1.RAST (77415/22/1)	gene	hypothetical protein
C893_RS0113140	C893_RS0113140, GI:648413101, WP_026104852.1	Bacillus_coagulans_H-1.RAST (77415/22/1)	gene	hypothetical protein
C893_RS0113240	C893_RS0113240, GI:648413103, WP_026104854.1	Bacillus_coagulans_H-1.RAST (77415/22/1)	gene	hypothetical protein
C893_RS0113440	C893_RS0113440, GI:648413106, WP_026104857.1	Bacillus_coagulans_H-1.RAST (77415/22/1)	gene	hypothetical protein
C893_RS0113545	C893_RS0113545, GI:516123748, WP_017554328.1	Bacillus_coagulans_H-1.RAST (77415/22/1)	gene	hypothetical protein
C893_RS0113640	C893_RS0113640, GI:516123763, WP_017554343.1	Bacillus_coagulans_H-1.RAST (77415/22/1)	gene	hypothetical protein
C893_RS0113720	C893_RS0113720, GI:516123777, WP_017554357.1	Bacillus_coagulans_H-1.RAST (77415/22/1)	gene	hypothetical protein
C893_RS0113885	C893_RS0113885, GI:516123802, WP_017554382.1	Bacillus_coagulans_H-1.RAST (77415/22/1)	gene	hypothetical protein
C893_RS0114265	C893_RS0114265, GI:516123855, WP_017554435.1	Bacillus_coagulans_H-1.RAST (77415/22/1)	gene	hypothetical protein
C893_RS0115055	C893_RS0115055, GI:503624362, WP_013858438.1	Bacillus_coagulans_H-1.RAST (77415/22/1)	gene	hypothetical protein
C893_RS18360	C893_RS18360, GI:516123968, WP_017554548.1	Bacillus_coagulans_H-1.RAST (77415/22/1)	gene	hypothetical protein
C893_RS0115735	C893_RS0115735, GI:516124064, WP_017554644.1	Bacillus_coagulans_H-1.RAST (77415/22/1)	gene	hypothetical protein
C893_RS0115910	C893_RS0115910, GI:516124092, WP_017554672.1	Bacillus_coagulans_H-1.RAST (77415/22/1)	gene	hypothetical protein
C893_RS0115955	C893_RS0115955, GI:516124100, WP_017554680.1	Bacillus_coagulans_H-1.RAST (77415/22/1)	gene	hypothetical protein
C893_RS18615	C893_RS18615, GI:516124185, WP_017554765.1	Bacillus_coagulans_H-1.RAST (77415/22/1)	gene	hypothetical protein
C893_RS0116590	C893_RS0116590, GI:516124204, WP_017554784.1	Bacillus_coagulans_H-1.RAST (77415/22/1)	gene	hypothetical protein
C893_RS0116985	C893_RS0116985, GI:516124264, WP_017554844.1	Bacillus_coagulans_H-1.RAST (77415/22/1)	gene	hypothetical protein
C893_RS0117130	C893_RS0117130, GI:516124288, WP_017554868.1	Bacillus_coagulans_H-1.RAST (77415/22/1)	gene	hypothetical protein
C893_RS0117155	C893_RS0117155, GI:516124293, WP_017554873.1	Bacillus_coagulans_H-1.RAST (77415/22/1)	gene	hypothetical protein
C893_RS0117190	C893_RS0117190, GI:516124300, WP_017554880.1	Bacillus_coagulans_H-1.RAST (77415/22/1)	gene	hypothetical protein
D420_RS0100155	D420_RS0100155, GI:516119524, WP_017550104.1	Bacillus_coagulans_XZL9.RAST (77415/20/1)	gene	hypothetical protein
D420_RS0100165	D420_RS0100165, GI:516119526, WP_017550106.1	Bacillus_coagulans_XZL9.RAST (77415/20/1)	gene	hypothetical protein
D420_RS0101155	D420_RS0101155, GI:516119648, WP_017550228.1	Bacillus_coagulans_XZL9.RAST (77415/20/1)	gene	hypothetical protein
D420_RS0101295	D420_RS0101295, GI:516119661, WP_017550241.1	Bacillus_coagulans_XZL9.RAST (77415/20/1)	gene	hypothetical protein
D420_RS0102610	D420_RS0102610, GI:516119778, WP_017550358.1	Bacillus_coagulans_XZL9.RAST (77415/20/1)	gene	hypothetical protein
D420_RS19715	D420_RS19715, GI:516119824, WP_017550404.1	Bacillus_coagulans_XZL9.RAST (77415/20/1)	gene	hypothetical protein
D420_RS0103920	D420_RS0103920, GI:503864106, WP_014098100.1	Bacillus_coagulans_XZL9.RAST (77415/20/1)	gene	hypothetical protein
D420_RS0105010	D420_RS0105010, GI:503863921, WP_014097915.1	Bacillus_coagulans_XZL9.RAST (77415/20/1)	gene	hypothetical protein
D420_RS0105200	D420_RS0105200, GI:516120032, WP_017550612.1	Bacillus_coagulans_XZL9.RAST (77415/20/1)	gene	hypothetical protein
D420_RS0105280	D420_RS0105280, GI:516120045, WP_017550625.1	Bacillus_coagulans_XZL9.RAST (77415/20/1)	gene	hypothetical protein
D420_RS0105655	D420_RS0105655, GI:516120094, WP_017550674.1	Bacillus_coagulans_XZL9.RAST (77415/20/1)	gene	hypothetical protein
D420_RS0106380	D420_RS0106380, GI:516120180, WP_017550760.1	Bacillus_coagulans_XZL9.RAST (77415/20/1)	gene	hypothetical protein
D420_RS0106500	D420_RS0106500, GI:503625112, WP_013859188.1	Bacillus_coagulans_XZL9.RAST (77415/20/1)	gene	hypothetical protein
D420_RS0107245	D420_RS0107245, GI:503864350, WP_014098344.1	Bacillus_coagulans_XZL9.RAST (77415/20/1)	gene	hypothetical protein
D420_RS0107720	D420_RS0107720, GI:516120319, WP_017550899.1	Bacillus_coagulans_XZL9.RAST (77415/20/1)	gene	hypothetical protein
D420_RS0107885	D420_RS0107885, GI:516120337, WP_017550917.1	Bacillus_coagulans_XZL9.RAST (77415/20/1)	gene	hypothetical protein
D420_RS0107905	D420_RS0107905, GI:648412813, WP_026104564.1	Bacillus_coagulans_XZL9.RAST (77415/20/1)	gene	hypothetical protein
D420_RS0107950	D420_RS0107950, GI:516120347, WP_017550927.1	Bacillus_coagulans_XZL9.RAST (77415/20/1)	gene	hypothetical protein
D420_RS0108030	D420_RS0108030, GI:516120360, WP_017550940.1	Bacillus_coagulans_XZL9.RAST (77415/20/1)	gene	hypothetical protein
D420_RS0108035	D420_RS0108035, GI:516120361, WP_017550941.1	Bacillus_coagulans_XZL9.RAST (77415/20/1)	gene	hypothetical protein
D420_RS0108040	D420_RS0108040, GI:516120362, WP_017550942.1	Bacillus_coagulans_XZL9.RAST (77415/20/1)	gene	hypothetical protein
D420_RS0108055	D420_RS0108055, GI:516120365, WP_017550945.1	Bacillus_coagulans_XZL9.RAST (77415/20/1)	gene	hypothetical protein
D420_RS0108095	D420_RS0108095, GI:516120369, WP_017550949.1	Bacillus_coagulans_XZL9.RAST (77415/20/1)	gene	hypothetical protein
D420_RS0108820	D420_RS0108820, GI:516120457, WP_017551037.1	Bacillus_coagulans_XZL9.RAST (77415/20/1)	gene	hypothetical protein
D420_RS0108830	D420_RS0108830, GI:516120459, WP_017551039.1	Bacillus_coagulans_XZL9.RAST (77415/20/1)	gene	hypothetical protein
D420_RS0108835	D420_RS0108835, GI:648412832, WP_026104583.1	Bacillus_coagulans_XZL9.RAST (77415/20/1)	gene	hypothetical protein
D420_RS0108850	D420_RS0108850, GI:516120462, WP_017551042.1	Bacillus_coagulans_XZL9.RAST (77415/20/1)	gene	hypothetical protein
D420_RS20010	D420_RS20010, GI:516120463, WP_017551043.1	Bacillus_coagulans_XZL9.RAST (77415/20/1)	gene	hypothetical protein
D420_RS20020	D420_RS20020, GI:516120509, WP_017551089.1	Bacillus_coagulans_XZL9.RAST (77415/20/1)	gene	hypothetical protein
D420_RS0109965	D420_RS0109965, GI:648412838, WP_026104589.1	Bacillus_coagulans_XZL9.RAST (77415/20/1)	gene	hypothetical protein
D420_RS0109975	D420_RS0109975, GI:516120583, WP_017551163.1	Bacillus_coagulans_XZL9.RAST (77415/20/1)	gene	hypothetical protein
D420_RS20075	D420_RS20075, GI:516120625, WP_017551205.1	Bacillus_coagulans_XZL9.RAST (77415/20/1)	gene	hypothetical protein
D420_RS20655	D420_RS20655, GI:648412848, WP_026104599.1	Bacillus_coagulans_XZL9.RAST (77415/20/1)	gene	hypothetical protein
D420_RS20125	D420_RS20125, GI:516120665, WP_017551245.1	Bacillus_coagulans_XZL9.RAST (77415/20/1)	gene	hypothetical protein
D420_RS0111790	D420_RS0111790, GI:737198782, WP_035184182.1	Bacillus_coagulans_XZL9.RAST (77415/20/1)	gene	hypothetical protein
D420_RS0113600	D420_RS0113600, GI:516121000, WP_017551580.1	Bacillus_coagulans_XZL9.RAST (77415/20/1)	gene	hypothetical protein
D420_RS0113605	D420_RS0113605, GI:648412881, WP_026104632.1	Bacillus_coagulans_XZL9.RAST (77415/20/1)	gene	hypothetical protein
D420_RS0113745	D420_RS0113745, GI:648412885, WP_026104636.1	Bacillus_coagulans_XZL9.RAST (77415/20/1)	gene	hypothetical protein
D420_RS20670	D420_RS20670, GI:516121085, WP_017551665.1	Bacillus_coagulans_XZL9.RAST (77415/20/1)	gene	hypothetical protein
D420_RS20290	D420_RS20290, GI:516121104, WP_017551684.1	Bacillus_coagulans_XZL9.RAST (77415/20/1)	gene	hypothetical protein
D420_RS0114505	D420_RS0114505, GI:516121137, WP_017551717.1	Bacillus_coagulans_XZL9.RAST (77415/20/1)	gene	hypothetical protein
D420_RS0114575	D420_RS0114575, GI:516121142, WP_017551722.1	Bacillus_coagulans_XZL9.RAST (77415/20/1)	gene	hypothetical protein
D420_RS0114590	D420_RS0114590, GI:516121145, WP_017551725.1	Bacillus_coagulans_XZL9.RAST (77415/20/1)	gene	hypothetical protein
D420_RS0114630	D420_RS0114630, GI:516121152, WP_017551732.1	Bacillus_coagulans_XZL9.RAST (77415/20/1)	gene	hypothetical protein
D420_RS0114755	D420_RS0114755, GI:516121165, WP_017551745.1	Bacillus_coagulans_XZL9.RAST (77415/20/1)	gene	hypothetical protein
D420_RS0115140	D420_RS0115140, GI:516121222, WP_017551802.1	Bacillus_coagulans_XZL9.RAST (77415/20/1)	gene	hypothetical protein
D420_RS20380	D420_RS20380, GI:737334678, WP_035316989.1	Bacillus_coagulans_XZL9.RAST (77415/20/1)	gene	hypothetical protein
D420_RS20390	D420_RS20390, GI:516121308, WP_017551888.1	Bacillus_coagulans_XZL9.RAST (77415/20/1)	gene	hypothetical protein
D420_RS0116025	D420_RS0116025, GI:516121311, WP_017551891.1	Bacillus_coagulans_XZL9.RAST (77415/20/1)	gene	hypothetical protein
D420_RS0116280	D420_RS0116280, GI:516121346, WP_017551926.1	Bacillus_coagulans_XZL9.RAST (77415/20/1)	gene	hypothetical protein
D420_RS0116420	D420_RS0116420, GI:503862081, WP_014096075.1	Bacillus_coagulans_XZL9.RAST (77415/20/1)	gene	hypothetical protein
D420_RS0116485	D420_RS0116485, GI:503624362, WP_013858438.1	Bacillus_coagulans_XZL9.RAST (77415/20/1)	gene	hypothetical protein
D420_RS20420	D420_RS20420, GI:737334688, WP_035316999.1	Bacillus_coagulans_XZL9.RAST (77415/20/1)	gene	hypothetical protein
D420_RS0117290	D420_RS0117290, GI:648412920, WP_026104671.1	Bacillus_coagulans_XZL9.RAST (77415/20/1)	gene	hypothetical protein
D420_RS0117375	D420_RS0117375, GI:516121468, WP_017552048.1	Bacillus_coagulans_XZL9.RAST (77415/20/1)	gene	hypothetical protein
D420_RS0117430	D420_RS0117430, GI:516121478, WP_017552058.1	Bacillus_coagulans_XZL9.RAST (77415/20/1)	gene	hypothetical protein
D420_RS0117560	D420_RS0117560, GI:516121499, WP_017552079.1	Bacillus_coagulans_XZL9.RAST (77415/20/1)	gene	hypothetical protein
D420_RS0117565	D420_RS0117565, GI:516121500, WP_017552080.1	Bacillus_coagulans_XZL9.RAST (77415/20/1)	gene	hypothetical protein
D420_RS0117570	D420_RS0117570, GI:516121501, WP_017552081.1	Bacillus_coagulans_XZL9.RAST (77415/20/1)	gene	hypothetical protein
D420_RS0117595	D420_RS0117595, GI:516121505, WP_017552085.1	Bacillus_coagulans_XZL9.RAST (77415/20/1)	gene	hypothetical protein
D420_RS20505	D420_RS20505, GI:737334748, WP_035317059.1	Bacillus_coagulans_XZL9.RAST (77415/20/1)	gene	hypothetical protein
D420_RS0117800	D420_RS0117800, GI:516121537, WP_017552117.1	Bacillus_coagulans_XZL9.RAST (77415/20/1)	gene	hypothetical protein
D420_RS0117815	D420_RS0117815, GI:516121539, WP_017552119.1	Bacillus_coagulans_XZL9.RAST (77415/20/1)	gene	hypothetical protein
D420_RS0118960	D420_RS0118960, GI:648412934, WP_026104685.1	Bacillus_coagulans_XZL9.RAST (77415/20/1)	gene	hypothetical protein
D420_RS0118975	D420_RS0118975, GI:516121684, WP_017552264.1	Bacillus_coagulans_XZL9.RAST (77415/20/1)	gene	hypothetical protein
D420_RS0118985	D420_RS0118985, GI:516121686, WP_017552266.1	Bacillus_coagulans_XZL9.RAST (77415/20/1)	gene	hypothetical protein
D420_RS20575	D420_RS20575, GI:516121765, WP_017552345.1	Bacillus_coagulans_XZL9.RAST (77415/20/1)	gene	hypothetical protein
E2E33_000145	E2E33_000145, MBF8416817.1	MA-13_genebank.gb_genome (77415/14/1)	gene	hypothetical protein
E2E33_000150	E2E33_000150, MBF8416818.1	MA-13_genebank.gb_genome (77415/14/1)	gene	hypothetical protein
E2E33_001210	E2E33_001210, MBF8417005.1	MA-13_genebank.gb_genome (77415/14/1)	gene	hypothetical protein
E2E33_001695	E2E33_001695, MBF8417101.1	MA-13_genebank.gb_genome (77415/14/1)	gene	hypothetical protein
E2E33_001805	E2E33_001805, MBF8417119.1	MA-13_genebank.gb_genome (77415/14/1)	gene	hypothetical protein
E2E33_002400	E2E33_002400, MBF8417225.1	MA-13_genebank.gb_genome (77415/14/1)	gene	hypothetical protein
E2E33_002575	E2E33_002575, MBF8417254.1	MA-13_genebank.gb_genome (77415/14/1)	gene	hypothetical protein
E2E33_002580	E2E33_002580, MBF8417255.1	MA-13_genebank.gb_genome (77415/14/1)	gene	hypothetical protein
E2E33_003045	E2E33_003045, MBF8417342.1	MA-13_genebank.gb_genome (77415/14/1)	gene	hypothetical protein
E2E33_004165	E2E33_004165, MBF8417554.1	MA-13_genebank.gb_genome (77415/14/1)	gene	hypothetical protein
E2E33_004535	E2E33_004535, MBF8417624.1	MA-13_genebank.gb_genome (77415/14/1)	gene	hypothetical protein
E2E33_004740	E2E33_004740, MBF8417663.1	MA-13_genebank.gb_genome (77415/14/1)	gene	hypothetical protein
E2E33_004885	E2E33_004885, MBF8417690.1	MA-13_genebank.gb_genome (77415/14/1)	gene	hypothetical protein
E2E33_004895	E2E33_004895, MBF8417692.1	MA-13_genebank.gb_genome (77415/14/1)	gene	hypothetical protein
E2E33_004930	E2E33_004930, MBF8417698.1	MA-13_genebank.gb_genome (77415/14/1)	gene	hypothetical protein
E2E33_004980	E2E33_004980, MBF8417708.1	MA-13_genebank.gb_genome (77415/14/1)	gene	hypothetical protein
E2E33_005360	E2E33_005360, MBF8417775.1	MA-13_genebank.gb_genome (77415/14/1)	gene	hypothetical protein
E2E33_005780	E2E33_005780, MBF8417850.1	MA-13_genebank.gb_genome (77415/14/1)	gene	hypothetical protein
E2E33_006090	E2E33_006090, MBF8417908.1	MA-13_genebank.gb_genome (77415/14/1)	gene	hypothetical protein
E2E33_007310	E2E33_007310, MBF8418134.1	MA-13_genebank.gb_genome (77415/14/1)	gene	hypothetical protein
E2E33_007335	E2E33_007335, MBF8418139.1	MA-13_genebank.gb_genome (77415/14/1)	gene	hypothetical protein
E2E33_007890	E2E33_007890, MBF8418248.1	MA-13_genebank.gb_genome (77415/14/1)	gene	hypothetical protein
E2E33_008065	E2E33_008065, MBF8418281.1	MA-13_genebank.gb_genome (77415/14/1)	gene	hypothetical protein
E2E33_008880	E2E33_008880, MBF8418439.1	MA-13_genebank.gb_genome (77415/14/1)	gene	hypothetical protein
E2E33_008885	E2E33_008885, MBF8418440.1	MA-13_genebank.gb_genome (77415/14/1)	gene	hypothetical protein
E2E33_009020	E2E33_009020, MBF8418463.1	MA-13_genebank.gb_genome (77415/14/1)	gene	hypothetical protein
E2E33_009165	E2E33_009165, MBF8418487.1	MA-13_genebank.gb_genome (77415/14/1)	gene	hypothetical protein
E2E33_009475	E2E33_009475, MBF8418528.1	MA-13_genebank.gb_genome (77415/14/1)	gene	hypothetical protein
E2E33_009505	E2E33_009505, MBF8418534.1	MA-13_genebank.gb_genome (77415/14/1)	gene	hypothetical protein
E2E33_010640	E2E33_010640, MBF8418747.1	MA-13_genebank.gb_genome (77415/14/1)	gene	hypothetical protein
E2E33_010780	E2E33_010780, MBF8418767.1	MA-13_genebank.gb_genome (77415/14/1)	gene	hypothetical protein
E2E33_010840	E2E33_010840, MBF8418779.1	MA-13_genebank.gb_genome (77415/14/1)	gene	hypothetical protein
E2E33_010900	E2E33_010900, MBF8418789.1	MA-13_genebank.gb_genome (77415/14/1)	gene	hypothetical protein
E2E33_011155	E2E33_011155, MBF8418818.1	MA-13_genebank.gb_genome (77415/14/1)	gene	hypothetical protein
E2E33_011200	E2E33_011200, MBF8418826.1	MA-13_genebank.gb_genome (77415/14/1)	gene	hypothetical protein
E2E33_011315	E2E33_011315, MBF8418848.1	MA-13_genebank.gb_genome (77415/14/1)	gene	hypothetical protein
E2E33_011470	E2E33_011470, MBF8418878.1	MA-13_genebank.gb_genome (77415/14/1)	gene	hypothetical protein
E2E33_011685	E2E33_011685, MBF8418917.1	MA-13_genebank.gb_genome (77415/14/1)	gene	hypothetical protein
E2E33_011690	E2E33_011690, MBF8418918.1	MA-13_genebank.gb_genome (77415/14/1)	gene	hypothetical protein
E2E33_011695	E2E33_011695, MBF8418919.1	MA-13_genebank.gb_genome (77415/14/1)	gene	hypothetical protein
E2E33_011700	E2E33_011700, MBF8418920.1	MA-13_genebank.gb_genome (77415/14/1)	gene	hypothetical protein
E2E33_011710	E2E33_011710, MBF8418922.1	MA-13_genebank.gb_genome (77415/14/1)	gene	hypothetical protein
E2E33_011715	E2E33_011715, MBF8418923.1	MA-13_genebank.gb_genome (77415/14/1)	gene	hypothetical protein
E2E33_011730	E2E33_011730, MBF8418926.1	MA-13_genebank.gb_genome (77415/14/1)	gene	hypothetical protein
E2E33_011740	E2E33_011740, MBF8418928.1	MA-13_genebank.gb_genome (77415/14/1)	gene	hypothetical protein
E2E33_011745	E2E33_011745, MBF8418929.1	MA-13_genebank.gb_genome (77415/14/1)	gene	hypothetical protein
E2E33_011750	E2E33_011750, MBF8418930.1	MA-13_genebank.gb_genome (77415/14/1)	gene	hypothetical protein
E2E33_011760	E2E33_011760, MBF8418932.1	MA-13_genebank.gb_genome (77415/14/1)	gene	hypothetical protein
E2E33_011765	E2E33_011765, MBF8418933.1	MA-13_genebank.gb_genome (77415/14/1)	gene	hypothetical protein
E2E33_011780	E2E33_011780, MBF8418936.1	MA-13_genebank.gb_genome (77415/14/1)	gene	hypothetical protein
E2E33_011800	E2E33_011800, MBF8418940.1	MA-13_genebank.gb_genome (77415/14/1)	gene	hypothetical protein
E2E33_011825	E2E33_011825, MBF8418945.1	MA-13_genebank.gb_genome (77415/14/1)	gene	hypothetical protein
E2E33_011830	E2E33_011830, MBF8418946.1	MA-13_genebank.gb_genome (77415/14/1)	gene	hypothetical protein
E2E33_011845	E2E33_011845, MBF8418949.1	MA-13_genebank.gb_genome (77415/14/1)	gene	hypothetical protein
E2E33_011865	E2E33_011865, MBF8418953.1	MA-13_genebank.gb_genome (77415/14/1)	gene	hypothetical protein
E2E33_011870	E2E33_011870, MBF8418954.1	MA-13_genebank.gb_genome (77415/14/1)	gene	hypothetical protein
E2E33_011875	E2E33_011875, MBF8418955.1	MA-13_genebank.gb_genome (77415/14/1)	gene	hypothetical protein
E2E33_012540	E2E33_012540, MBF8419085.1	MA-13_genebank.gb_genome (77415/14/1)	gene	hypothetical protein
E2E33_012640	E2E33_012640, MBF8419104.1	MA-13_genebank.gb_genome (77415/14/1)	gene	hypothetical protein
E2E33_012650	E2E33_012650, MBF8419106.1	MA-13_genebank.gb_genome (77415/14/1)	gene	hypothetical protein
E2E33_012870	E2E33_012870, MBF8419148.1	MA-13_genebank.gb_genome (77415/14/1)	gene	hypothetical protein
E2E33_013675	E2E33_013675, MBF8419297.1	MA-13_genebank.gb_genome (77415/14/1)	gene	hypothetical protein
E2E33_013705	E2E33_013705, MBF8419302.1	MA-13_genebank.gb_genome (77415/14/1)	gene	hypothetical protein
E2E33_013845	E2E33_013845, MBF8419328.1	MA-13_genebank.gb_genome (77415/14/1)	gene	hypothetical protein
E2E33_013850	E2E33_013850, MBF8419329.1	MA-13_genebank.gb_genome (77415/14/1)	gene	hypothetical protein
E2E33_013870	E2E33_013870, MBF8419333.1	MA-13_genebank.gb_genome (77415/14/1)	gene	hypothetical protein
I001_RS0100690	GI:651960023, I001_RS0100690, WP_026683275.1	Bacillus_coagulans_CSIL1.RAST (77415/19/1)	gene	hypothetical protein
I001_RS0100940	GI:503864106, I001_RS0100940, WP_014098100.1	Bacillus_coagulans_CSIL1.RAST (77415/19/1)	gene	hypothetical protein
I001_RS0101595	GI:651960218, I001_RS0101595, WP_026683367.1	Bacillus_coagulans_CSIL1.RAST (77415/19/1)	gene	hypothetical protein
I001_RS0101965	GI:651960301, I001_RS0101965, WP_026683409.1	Bacillus_coagulans_CSIL1.RAST (77415/19/1)	gene	hypothetical protein
I001_RS0102340	GI:503864350, I001_RS0102340, WP_014098344.1	Bacillus_coagulans_CSIL1.RAST (77415/19/1)	gene	hypothetical protein
I001_RS19425	GI:737215053, I001_RS19425, WP_035199758.1	Bacillus_coagulans_CSIL1.RAST (77415/19/1)	gene	hypothetical protein
I001_RS0103390	GI:651960647, I001_RS0103390, WP_026683546.1	Bacillus_coagulans_CSIL1.RAST (77415/19/1)	gene	hypothetical protein
I001_RS0103395	GI:651960649, I001_RS0103395, WP_026683547.1	Bacillus_coagulans_CSIL1.RAST (77415/19/1)	gene	hypothetical protein
I001_RS0103400	GI:651960651, I001_RS0103400, WP_026683548.1	Bacillus_coagulans_CSIL1.RAST (77415/19/1)	gene	hypothetical protein
I001_RS0103405	GI:651960653, I001_RS0103405, WP_026683549.1	Bacillus_coagulans_CSIL1.RAST (77415/19/1)	gene	hypothetical protein
I001_RS0103410	GI:651960655, I001_RS0103410, WP_026683550.1	Bacillus_coagulans_CSIL1.RAST (77415/19/1)	gene	hypothetical protein
I001_RS0103435	GI:651960659, I001_RS0103435, WP_026683552.1	Bacillus_coagulans_CSIL1.RAST (77415/19/1)	gene	hypothetical protein
I001_RS0103530	GI:651960688, I001_RS0103530, WP_026683568.1	Bacillus_coagulans_CSIL1.RAST (77415/19/1)	gene	hypothetical protein
I001_RS0103545	GI:651960689, I001_RS0103545, WP_026683569.1	Bacillus_coagulans_CSIL1.RAST (77415/19/1)	gene	hypothetical protein
I001_RS20430	GI:916750474, I001_RS20430, WP_051357530.1	Bacillus_coagulans_CSIL1.RAST (77415/19/1)	gene	hypothetical protein
I001_RS0103555	GI:651960690, I001_RS0103555, WP_026683570.1	Bacillus_coagulans_CSIL1.RAST (77415/19/1)	gene	hypothetical protein
I001_RS19470	GI:916750476, I001_RS19470, WP_051357532.1	Bacillus_coagulans_CSIL1.RAST (77415/19/1)	gene	hypothetical protein
I001_RS0103820	GI:503863921, I001_RS0103820, WP_014097915.1	Bacillus_coagulans_CSIL1.RAST (77415/19/1)	gene	hypothetical protein
I001_RS19505	GI:916750478, I001_RS19505, WP_051357534.1	Bacillus_coagulans_CSIL1.RAST (77415/19/1)	gene	hypothetical protein
I001_RS19510	GI:916750479, I001_RS19510, WP_051357535.1	Bacillus_coagulans_CSIL1.RAST (77415/19/1)	gene	hypothetical protein
I001_RS0104425	GI:651960827, I001_RS0104425, WP_026683629.1	Bacillus_coagulans_CSIL1.RAST (77415/19/1)	gene	hypothetical protein
I001_RS0105095	GI:503625112, I001_RS0105095, WP_013859188.1	Bacillus_coagulans_CSIL1.RAST (77415/19/1)	gene	hypothetical protein
I001_RS0105645	GI:516119648, I001_RS0105645, WP_017550228.1	Bacillus_coagulans_CSIL1.RAST (77415/19/1)	gene	hypothetical protein
I001_RS0106105	GI:651961173, I001_RS0106105, WP_026683772.1	Bacillus_coagulans_CSIL1.RAST (77415/19/1)	gene	hypothetical protein
I001_RS0106115	GI:651961177, I001_RS0106115, WP_026683774.1	Bacillus_coagulans_CSIL1.RAST (77415/19/1)	gene	hypothetical protein
I001_RS0106120	GI:651961179, I001_RS0106120, WP_026683775.1	Bacillus_coagulans_CSIL1.RAST (77415/19/1)	gene	hypothetical protein
I001_RS0106135	GI:651961183, I001_RS0106135, WP_026683777.1	Bacillus_coagulans_CSIL1.RAST (77415/19/1)	gene	hypothetical protein
I001_RS0107470	GI:651961409, I001_RS0107470, WP_026683879.1	Bacillus_coagulans_CSIL1.RAST (77415/19/1)	gene	hypothetical protein
I001_RS0107475	GI:651961411, I001_RS0107475, WP_026683880.1	Bacillus_coagulans_CSIL1.RAST (77415/19/1)	gene	hypothetical protein
I001_RS0107590	GI:651961457, I001_RS0107590, WP_026683900.1	Bacillus_coagulans_CSIL1.RAST (77415/19/1)	gene	hypothetical protein
I001_RS19670	GI:737215247, I001_RS19670, WP_035199952.1	Bacillus_coagulans_CSIL1.RAST (77415/19/1)	gene	hypothetical protein
I001_RS0108745	GI:651961731, I001_RS0108745, WP_026684024.1	Bacillus_coagulans_CSIL1.RAST (77415/19/1)	gene	hypothetical protein
I001_RS0109605	GI:651961887, I001_RS0109605, WP_026684089.1	Bacillus_coagulans_CSIL1.RAST (77415/19/1)	gene	hypothetical protein
I001_RS0109615	GI:651961891, I001_RS0109615, WP_026684091.1	Bacillus_coagulans_CSIL1.RAST (77415/19/1)	gene	hypothetical protein
I001_RS0109685	GI:651961915, I001_RS0109685, WP_026684102.1	Bacillus_coagulans_CSIL1.RAST (77415/19/1)	gene	hypothetical protein
I001_RS0109735	GI:651961932, I001_RS0109735, WP_026684110.1	Bacillus_coagulans_CSIL1.RAST (77415/19/1)	gene	hypothetical protein
I001_RS0110230	GI:651962018, I001_RS0110230, WP_026684145.1	Bacillus_coagulans_CSIL1.RAST (77415/19/1)	gene	hypothetical protein
I001_RS20455	GI:516121085, I001_RS20455, WP_017551665.1	Bacillus_coagulans_CSIL1.RAST (77415/19/1)	gene	hypothetical protein
I001_RS0110530	GI:651962059, I001_RS0110530, WP_026684171.1	Bacillus_coagulans_CSIL1.RAST (77415/19/1)	gene	hypothetical protein
I001_RS0111035	GI:651962126, I001_RS0111035, WP_026684235.1	Bacillus_coagulans_CSIL1.RAST (77415/19/1)	gene	hypothetical protein
I001_RS20470	GI:916750497, I001_RS20470, WP_051357553.1	Bacillus_coagulans_CSIL1.RAST (77415/19/1)	gene	hypothetical protein
I001_RS0111235	GI:737215383, I001_RS0111235, WP_035200088.1	Bacillus_coagulans_CSIL1.RAST (77415/19/1)	gene	hypothetical protein
I001_RS0111265	GI:737215392, I001_RS0111265, WP_035200097.1	Bacillus_coagulans_CSIL1.RAST (77415/19/1)	gene	hypothetical protein
I001_RS0111300	GI:651962168, I001_RS0111300, WP_026684275.1	Bacillus_coagulans_CSIL1.RAST (77415/19/1)	gene	hypothetical protein
I001_RS0111305	GI:651962169, I001_RS0111305, WP_026684276.1	Bacillus_coagulans_CSIL1.RAST (77415/19/1)	gene	hypothetical protein
I001_RS0111330	GI:651962174, I001_RS0111330, WP_026684281.1	Bacillus_coagulans_CSIL1.RAST (77415/19/1)	gene	hypothetical protein
I001_RS0111335	GI:651962175, I001_RS0111335, WP_026684282.1	Bacillus_coagulans_CSIL1.RAST (77415/19/1)	gene	hypothetical protein
I001_RS0111490	GI:651962191, I001_RS0111490, WP_026684297.1	Bacillus_coagulans_CSIL1.RAST (77415/19/1)	gene	hypothetical protein
I001_RS0111515	GI:651962196, I001_RS0111515, WP_026684302.1	Bacillus_coagulans_CSIL1.RAST (77415/19/1)	gene	hypothetical protein
I001_RS0111520	GI:651962197, I001_RS0111520, WP_026684303.1	Bacillus_coagulans_CSIL1.RAST (77415/19/1)	gene	hypothetical protein
I001_RS0111595	GI:651962210, I001_RS0111595, WP_026684316.1	Bacillus_coagulans_CSIL1.RAST (77415/19/1)	gene	hypothetical protein
I001_RS0111675	GI:651962224, I001_RS0111675, WP_026684329.1	Bacillus_coagulans_CSIL1.RAST (77415/19/1)	gene	hypothetical protein
I001_RS0112435	GI:651962305, I001_RS0112435, WP_026684406.1	Bacillus_coagulans_CSIL1.RAST (77415/19/1)	gene	hypothetical protein
I001_RS0112440	GI:651962306, I001_RS0112440, WP_026684407.1	Bacillus_coagulans_CSIL1.RAST (77415/19/1)	gene	hypothetical protein
I001_RS0112475	GI:651962311, I001_RS0112475, WP_026684412.1	Bacillus_coagulans_CSIL1.RAST (77415/19/1)	gene	hypothetical protein
I001_RS0112515	GI:651962317, I001_RS0112515, WP_026684417.1	Bacillus_coagulans_CSIL1.RAST (77415/19/1)	gene	hypothetical protein
I001_RS0112545	GI:651962321, I001_RS0112545, WP_026684421.1	Bacillus_coagulans_CSIL1.RAST (77415/19/1)	gene	hypothetical protein
I001_RS0112555	GI:651962323, I001_RS0112555, WP_026684423.1	Bacillus_coagulans_CSIL1.RAST (77415/19/1)	gene	hypothetical protein
I001_RS0112565	GI:651962324, I001_RS0112565, WP_026684424.1	Bacillus_coagulans_CSIL1.RAST (77415/19/1)	gene	hypothetical protein
I001_RS0112825	GI:651962356, I001_RS0112825, WP_026684454.1	Bacillus_coagulans_CSIL1.RAST (77415/19/1)	gene	hypothetical protein
I001_RS19875	GI:737215492, I001_RS19875, WP_035200197.1	Bacillus_coagulans_CSIL1.RAST (77415/19/1)	gene	hypothetical protein
I001_RS0112975	GI:651962373, I001_RS0112975, WP_026684470.1	Bacillus_coagulans_CSIL1.RAST (77415/19/1)	gene	hypothetical protein
I001_RS19890	GI:916750509, I001_RS19890, WP_051357565.1	Bacillus_coagulans_CSIL1.RAST (77415/19/1)	gene	hypothetical protein
I001_RS0112990	GI:651962375, I001_RS0112990, WP_026684472.1	Bacillus_coagulans_CSIL1.RAST (77415/19/1)	gene	hypothetical protein
I001_RS0113145	GI:651962398, I001_RS0113145, WP_026684495.1	Bacillus_coagulans_CSIL1.RAST (77415/19/1)	gene	hypothetical protein
I001_RS0113315	GI:651962373, I001_RS0113315, WP_026684470.1	Bacillus_coagulans_CSIL1.RAST (77415/19/1)	gene	hypothetical protein
I001_RS0113370	GI:651962427, I001_RS0113370, WP_026684522.1	Bacillus_coagulans_CSIL1.RAST (77415/19/1)	gene	hypothetical protein
I001_RS0113385	GI:651962430, I001_RS0113385, WP_026684525.1	Bacillus_coagulans_CSIL1.RAST (77415/19/1)	gene	hypothetical protein
I001_RS0113435	GI:651962437, I001_RS0113435, WP_026684532.1	Bacillus_coagulans_CSIL1.RAST (77415/19/1)	gene	hypothetical protein
I001_RS19920	GI:916750510, I001_RS19920, WP_051357566.1	Bacillus_coagulans_CSIL1.RAST (77415/19/1)	gene	hypothetical protein
I001_RS0113970	GI:651962519, I001_RS0113970, WP_026684610.1	Bacillus_coagulans_CSIL1.RAST (77415/19/1)	gene	hypothetical protein
I001_RS0114195	GI:651962538, I001_RS0114195, WP_026684627.1	Bacillus_coagulans_CSIL1.RAST (77415/19/1)	gene	hypothetical protein
I001_RS0114405	GI:651962567, I001_RS0114405, WP_026684655.1	Bacillus_coagulans_CSIL1.RAST (77415/19/1)	gene	hypothetical protein
I001_RS0114490	GI:651962583, I001_RS0114490, WP_026684670.1	Bacillus_coagulans_CSIL1.RAST (77415/19/1)	gene	hypothetical protein
I001_RS0114720	GI:651962611, I001_RS0114720, WP_026684696.1	Bacillus_coagulans_CSIL1.RAST (77415/19/1)	gene	hypothetical protein
I001_RS0114765	GI:651962616, I001_RS0114765, WP_026684700.1	Bacillus_coagulans_CSIL1.RAST (77415/19/1)	gene	hypothetical protein
I001_RS0114775	GI:651962618, I001_RS0114775, WP_026684702.1	Bacillus_coagulans_CSIL1.RAST (77415/19/1)	gene	hypothetical protein
I001_RS0114790	GI:651962621, I001_RS0114790, WP_026684705.1	Bacillus_coagulans_CSIL1.RAST (77415/19/1)	gene	hypothetical protein
I001_RS0114895	GI:651962638, I001_RS0114895, WP_026684721.1	Bacillus_coagulans_CSIL1.RAST (77415/19/1)	gene	hypothetical protein
I001_RS0114920	GI:651962640, I001_RS0114920, WP_026684723.1	Bacillus_coagulans_CSIL1.RAST (77415/19/1)	gene	hypothetical protein
I001_RS0115075	GI:651962662, I001_RS0115075, WP_026684743.1	Bacillus_coagulans_CSIL1.RAST (77415/19/1)	gene	hypothetical protein
I001_RS0115145	GI:651962675, I001_RS0115145, WP_026684756.1	Bacillus_coagulans_CSIL1.RAST (77415/19/1)	gene	hypothetical protein
I001_RS0115600	GI:651962720, I001_RS0115600, WP_026684796.1	Bacillus_coagulans_CSIL1.RAST (77415/19/1)	gene	hypothetical protein
I001_RS0115605	GI:651962721, I001_RS0115605, WP_026684797.1	Bacillus_coagulans_CSIL1.RAST (77415/19/1)	gene	hypothetical protein
I001_RS0115725	GI:651962731, I001_RS0115725, WP_026684806.1	Bacillus_coagulans_CSIL1.RAST (77415/19/1)	gene	hypothetical protein
I001_RS0115760	GI:651962737, I001_RS0115760, WP_026684812.1	Bacillus_coagulans_CSIL1.RAST (77415/19/1)	gene	hypothetical protein
I001_RS0115780	GI:651962740, I001_RS0115780, WP_026684814.1	Bacillus_coagulans_CSIL1.RAST (77415/19/1)	gene	hypothetical protein
I001_RS0115905	GI:651962749, I001_RS0115905, WP_026684822.1	Bacillus_coagulans_CSIL1.RAST (77415/19/1)	gene	hypothetical protein
I001_RS0115945	GI:916750526, I001_RS0115945, WP_051357582.1	Bacillus_coagulans_CSIL1.RAST (77415/19/1)	gene	hypothetical protein
I001_RS0115960	GI:651962759, I001_RS0115960, WP_026684831.1	Bacillus_coagulans_CSIL1.RAST (77415/19/1)	gene	hypothetical protein
I001_RS0116000	GI:651962766, I001_RS0116000, WP_026684838.1	Bacillus_coagulans_CSIL1.RAST (77415/19/1)	gene	hypothetical protein
I001_RS20105	GI:737215755, I001_RS20105, WP_035200460.1	Bacillus_coagulans_CSIL1.RAST (77415/19/1)	gene	hypothetical protein
I001_RS20495	GI:916750528, I001_RS20495, WP_051357584.1	Bacillus_coagulans_CSIL1.RAST (77415/19/1)	gene	hypothetical protein
I001_RS0116405	GI:737215785, I001_RS0116405, WP_035200490.1	Bacillus_coagulans_CSIL1.RAST (77415/19/1)	gene	hypothetical protein
I001_RS0116410	GI:651962817, I001_RS0116410, WP_026684882.1	Bacillus_coagulans_CSIL1.RAST (77415/19/1)	gene	hypothetical protein
I001_RS20135	GI:737215787, I001_RS20135, WP_035200492.1	Bacillus_coagulans_CSIL1.RAST (77415/19/1)	gene	hypothetical protein
I001_RS0116425	GI:651962819, I001_RS0116425, WP_026684884.1	Bacillus_coagulans_CSIL1.RAST (77415/19/1)	gene	hypothetical protein
I001_RS20500	GI:916750529, I001_RS20500, WP_051357585.1	Bacillus_coagulans_CSIL1.RAST (77415/19/1)	gene	hypothetical protein
I001_RS20505	GI:916750530, I001_RS20505, WP_051357586.1	Bacillus_coagulans_CSIL1.RAST (77415/19/1)	gene	hypothetical protein
I001_RS20165	GI:737215800, I001_RS20165, WP_035200505.1	Bacillus_coagulans_CSIL1.RAST (77415/19/1)	gene	hypothetical protein
I001_RS20170	GI:737215802, I001_RS20170, WP_035200507.1	Bacillus_coagulans_CSIL1.RAST (77415/19/1)	gene	hypothetical protein
I001_RS20195	GI:737215820, I001_RS20195, WP_035200525.1	Bacillus_coagulans_CSIL1.RAST (77415/19/1)	gene	hypothetical protein
I001_RS0117015	GI:651962870, I001_RS0117015, WP_026684926.1	Bacillus_coagulans_CSIL1.RAST (77415/19/1)	gene	hypothetical protein
I001_RS0117090	GI:651962880, I001_RS0117090, WP_026684934.1	Bacillus_coagulans_CSIL1.RAST (77415/19/1)	gene	hypothetical protein
I001_RS20225	GI:737215846, I001_RS20225, WP_035200551.1	Bacillus_coagulans_CSIL1.RAST (77415/19/1)	gene	hypothetical protein
I001_RS0117335	GI:517494829, I001_RS0117335, WP_018665406.1	Bacillus_coagulans_CSIL1.RAST (77415/19/1)	gene	hypothetical protein
I001_RS0117350	GI:651962912, I001_RS0117350, WP_026684960.1	Bacillus_coagulans_CSIL1.RAST (77415/19/1)	gene	hypothetical protein
I001_RS0117360	GI:651962914, I001_RS0117360, WP_026684962.1	Bacillus_coagulans_CSIL1.RAST (77415/19/1)	gene	hypothetical protein
I001_RS0117365	GI:651962915, I001_RS0117365, WP_026684963.1	Bacillus_coagulans_CSIL1.RAST (77415/19/1)	gene	hypothetical protein
I001_RS0117455	GI:651962926, I001_RS0117455, WP_026684971.1	Bacillus_coagulans_CSIL1.RAST (77415/19/1)	gene	hypothetical protein
I001_RS20280	GI:916750533, I001_RS20280, WP_051357589.1	Bacillus_coagulans_CSIL1.RAST (77415/19/1)	gene	hypothetical protein
I001_RS0117515	GI:651962934, I001_RS0117515, WP_026684977.1	Bacillus_coagulans_CSIL1.RAST (77415/19/1)	gene	hypothetical protein
I001_RS0117630	GI:651962952, I001_RS0117630, WP_026684990.1	Bacillus_coagulans_CSIL1.RAST (77415/19/1)	gene	hypothetical protein
I001_RS0117730	GI:651962970, I001_RS0117730, WP_026685000.1	Bacillus_coagulans_CSIL1.RAST (77415/19/1)	gene	hypothetical protein
I001_RS0117760	GI:651962975, I001_RS0117760, WP_026685002.1	Bacillus_coagulans_CSIL1.RAST (77415/19/1)	gene	hypothetical protein
I001_RS0117800	GI:503862081, I001_RS0117800, WP_014096075.1	Bacillus_coagulans_CSIL1.RAST (77415/19/1)	gene	hypothetical protein
I001_RS0117870	GI:503624362, I001_RS0117870, WP_013858438.1	Bacillus_coagulans_CSIL1.RAST (77415/19/1)	gene	hypothetical protein
I001_RS0117980	GI:651962999, I001_RS0117980, WP_026685023.1	Bacillus_coagulans_CSIL1.RAST (77415/19/1)	gene	hypothetical protein
I001_RS0117995	GI:651963001, I001_RS0117995, WP_026685025.1	Bacillus_coagulans_CSIL1.RAST (77415/19/1)	gene	hypothetical protein
I001_RS0118000	GI:651963002, I001_RS0118000, WP_026685026.1	Bacillus_coagulans_CSIL1.RAST (77415/19/1)	gene	hypothetical protein
I001_RS0118180	GI:651963026, I001_RS0118180, WP_026685050.1	Bacillus_coagulans_CSIL1.RAST (77415/19/1)	gene	hypothetical protein
I001_RS0118525	GI:651963082, I001_RS0118525, WP_026685105.1	Bacillus_coagulans_CSIL1.RAST (77415/19/1)	gene	hypothetical protein
I001_RS0118725	GI:651963111, I001_RS0118725, WP_026685133.1	Bacillus_coagulans_CSIL1.RAST (77415/19/1)	gene	hypothetical protein
I001_RS0119200	GI:651963155, I001_RS0119200, WP_026685175.1	Bacillus_coagulans_CSIL1.RAST (77415/19/1)	gene	hypothetical protein
I001_RS0119295	GI:737216065, I001_RS0119295, WP_035200770.1	Bacillus_coagulans_CSIL1.RAST (77415/19/1)	gene	hypothetical protein
IOE_RS0100025	GI:518549879, IOE_RS0100025, WP_019720086.1	Bacillus_coagulans_XZL4.RAST (77415/18/1)	gene	hypothetical protein
IOE_RS0100170	GI:518549899, IOE_RS0100170, WP_019720106.1	Bacillus_coagulans_XZL4.RAST (77415/18/1)	gene	hypothetical protein
IOE_RS0100230	GI:518549906, IOE_RS0100230, WP_019720113.1	Bacillus_coagulans_XZL4.RAST (77415/18/1)	gene	hypothetical protein
IOE_RS0100390	GI:518549931, IOE_RS0100390, WP_019720138.1	Bacillus_coagulans_XZL4.RAST (77415/18/1)	gene	hypothetical protein
IOE_RS0100455	GI:503863133, IOE_RS0100455, WP_014097127.1	Bacillus_coagulans_XZL4.RAST (77415/18/1)	gene	hypothetical protein
IOE_RS16655	GI:737335323, IOE_RS16655, WP_035317634.1	Bacillus_coagulans_XZL4.RAST (77415/18/1)	gene	hypothetical protein
IOE_RS0100745	GI:518549981, IOE_RS0100745, WP_019720188.1	Bacillus_coagulans_XZL4.RAST (77415/18/1)	gene	hypothetical protein
IOE_RS17805	GI:518550001, IOE_RS17805, WP_019720208.1	Bacillus_coagulans_XZL4.RAST (77415/18/1)	gene	hypothetical protein
IOE_RS0100995	GI:518550014, IOE_RS0100995, WP_019720221.1	Bacillus_coagulans_XZL4.RAST (77415/18/1)	gene	hypothetical protein
IOE_RS0101040	GI:518550023, IOE_RS0101040, WP_019720230.1	Bacillus_coagulans_XZL4.RAST (77415/18/1)	gene	hypothetical protein
IOE_RS0101045	GI:518550024, IOE_RS0101045, WP_019720231.1	Bacillus_coagulans_XZL4.RAST (77415/18/1)	gene	hypothetical protein
IOE_RS0101050	GI:518550025, IOE_RS0101050, WP_019720232.1	Bacillus_coagulans_XZL4.RAST (77415/18/1)	gene	hypothetical protein
IOE_RS0101060	GI:518550027, IOE_RS0101060, WP_019720234.1	Bacillus_coagulans_XZL4.RAST (77415/18/1)	gene	hypothetical protein
IOE_RS0101065	GI:518550028, IOE_RS0101065, WP_019720235.1	Bacillus_coagulans_XZL4.RAST (77415/18/1)	gene	hypothetical protein
IOE_RS0101070	GI:518550029, IOE_RS0101070, WP_019720236.1	Bacillus_coagulans_XZL4.RAST (77415/18/1)	gene	hypothetical protein
IOE_RS0101075	GI:518550030, IOE_RS0101075, WP_019720237.1	Bacillus_coagulans_XZL4.RAST (77415/18/1)	gene	hypothetical protein
IOE_RS0101080	GI:518550031, IOE_RS0101080, WP_019720238.1	Bacillus_coagulans_XZL4.RAST (77415/18/1)	gene	hypothetical protein
IOE_RS0101085	GI:518550032, IOE_RS0101085, WP_019720239.1	Bacillus_coagulans_XZL4.RAST (77415/18/1)	gene	hypothetical protein
IOE_RS0101100	GI:518550035, IOE_RS0101100, WP_019720242.1	Bacillus_coagulans_XZL4.RAST (77415/18/1)	gene	hypothetical protein
IOE_RS0101110	GI:518550037, IOE_RS0101110, WP_019720244.1	Bacillus_coagulans_XZL4.RAST (77415/18/1)	gene	hypothetical protein
IOE_RS0101115	GI:518550038, IOE_RS0101115, WP_019720245.1	Bacillus_coagulans_XZL4.RAST (77415/18/1)	gene	hypothetical protein
IOE_RS16695	GI:737335358, IOE_RS16695, WP_035317669.1	Bacillus_coagulans_XZL4.RAST (77415/18/1)	gene	hypothetical protein
IOE_RS0101385	GI:518550070, IOE_RS0101385, WP_019720277.1	Bacillus_coagulans_XZL4.RAST (77415/18/1)	gene	hypothetical protein
IOE_RS16710	GI:737335366, IOE_RS16710, WP_035317677.1	Bacillus_coagulans_XZL4.RAST (77415/18/1)	gene	hypothetical protein
IOE_RS0101765	GI:518550114, IOE_RS0101765, WP_019720321.1	Bacillus_coagulans_XZL4.RAST (77415/18/1)	gene	hypothetical protein
IOE_RS0101775	GI:518550116, IOE_RS0101775, WP_019720323.1	Bacillus_coagulans_XZL4.RAST (77415/18/1)	gene	hypothetical protein
IOE_RS0101800	GI:518550120, IOE_RS0101800, WP_019720327.1	Bacillus_coagulans_XZL4.RAST (77415/18/1)	gene	hypothetical protein
IOE_RS0101935	GI:518550144, IOE_RS0101935, WP_019720351.1	Bacillus_coagulans_XZL4.RAST (77415/18/1)	gene	hypothetical protein
IOE_RS0101940	GI:518550145, IOE_RS0101940, WP_019720352.1	Bacillus_coagulans_XZL4.RAST (77415/18/1)	gene	hypothetical protein
IOE_RS0102050	GI:518550161, IOE_RS0102050, WP_019720368.1	Bacillus_coagulans_XZL4.RAST (77415/18/1)	gene	hypothetical protein
IOE_RS0102380	GI:518550201, IOE_RS0102380, WP_019720408.1	Bacillus_coagulans_XZL4.RAST (77415/18/1)	gene	hypothetical protein
IOE_RS0102680	GI:518550246, IOE_RS0102680, WP_019720453.1	Bacillus_coagulans_XZL4.RAST (77415/18/1)	gene	hypothetical protein
IOE_RS16840	GI:737335431, IOE_RS16840, WP_035317742.1	Bacillus_coagulans_XZL4.RAST (77415/18/1)	gene	hypothetical protein
IOE_RS0102755	GI:518550257, IOE_RS0102755, WP_019720464.1	Bacillus_coagulans_XZL4.RAST (77415/18/1)	gene	hypothetical protein
IOE_RS0103075	GI:518550291, IOE_RS0103075, WP_019720498.1	Bacillus_coagulans_XZL4.RAST (77415/18/1)	gene	hypothetical protein
IOE_RS0103090	GI:518550294, IOE_RS0103090, WP_019720501.1	Bacillus_coagulans_XZL4.RAST (77415/18/1)	gene	hypothetical protein
IOE_RS0103140	GI:518550301, IOE_RS0103140, WP_019720508.1	Bacillus_coagulans_XZL4.RAST (77415/18/1)	gene	hypothetical protein
IOE_RS0103160	GI:656143908, IOE_RS0103160, WP_029141280.1	Bacillus_coagulans_XZL4.RAST (77415/18/1)	gene	hypothetical protein
IOE_RS0103280	GI:518550323, IOE_RS0103280, WP_019720530.1	Bacillus_coagulans_XZL4.RAST (77415/18/1)	gene	hypothetical protein
IOE_RS0103310	GI:518550328, IOE_RS0103310, WP_019720535.1	Bacillus_coagulans_XZL4.RAST (77415/18/1)	gene	hypothetical protein
IOE_RS16930	GI:518550460, IOE_RS16930, WP_019720667.1	Bacillus_coagulans_XZL4.RAST (77415/18/1)	gene	hypothetical protein
IOE_RS0106855	GI:518550776, IOE_RS0106855, WP_019720983.1	Bacillus_coagulans_XZL4.RAST (77415/18/1)	gene	hypothetical protein
IOE_RS0107490	GI:518550861, IOE_RS0107490, WP_019721068.1	Bacillus_coagulans_XZL4.RAST (77415/18/1)	gene	hypothetical protein
IOE_RS0108840	GI:518551017, IOE_RS0108840, WP_019721224.1	Bacillus_coagulans_XZL4.RAST (77415/18/1)	gene	hypothetical protein
IOE_RS0108155	GI:503625112, IOE_RS0108155, WP_013859188.1	Bacillus_coagulans_XZL4.RAST (77415/18/1)	gene	hypothetical protein
IOE_RS0109295	GI:518551078, IOE_RS0109295, WP_019721285.1	Bacillus_coagulans_XZL4.RAST (77415/18/1)	gene	hypothetical protein
IOE_RS17380	GI:737335853, IOE_RS17380, WP_035318164.1	Bacillus_coagulans_XZL4.RAST (77415/18/1)	gene	hypothetical protein
IOE_RS0110540	GI:518551245, IOE_RS0110540, WP_019721452.1	Bacillus_coagulans_XZL4.RAST (77415/18/1)	gene	hypothetical protein
IOE_RS0111785	GI:516121468, IOE_RS0111785, WP_017552048.1	Bacillus_coagulans_XZL4.RAST (77415/18/1)	gene	hypothetical protein
IOE_RS0112325	GI:518551519, IOE_RS0112325, WP_019721726.1	Bacillus_coagulans_XZL4.RAST (77415/18/1)	gene	hypothetical protein
IOE_RS0112520	GI:518551546, IOE_RS0112520, WP_019721753.1	Bacillus_coagulans_XZL4.RAST (77415/18/1)	gene	hypothetical protein
IOE_RS0112585	GI:516119648, IOE_RS0112585, WP_017550228.1	Bacillus_coagulans_XZL4.RAST (77415/18/1)	gene	hypothetical protein
IOE_RS0112630	GI:518551562, IOE_RS0112630, WP_019721769.1	Bacillus_coagulans_XZL4.RAST (77415/18/1)	gene	hypothetical protein
IOE_RS0112700	GI:518551575, IOE_RS0112700, WP_019721782.1	Bacillus_coagulans_XZL4.RAST (77415/18/1)	gene	hypothetical protein
IOE_RS0113250	GI:518551657, IOE_RS0113250, WP_019721864.1	Bacillus_coagulans_XZL4.RAST (77415/18/1)	gene	hypothetical protein
IOE_RS0113540	GI:518551698, IOE_RS0113540, WP_019721905.1	Bacillus_coagulans_XZL4.RAST (77415/18/1)	gene	hypothetical protein
IOE_RS0113625	GI:656144152, IOE_RS0113625, WP_029141366.1	Bacillus_coagulans_XZL4.RAST (77415/18/1)	gene	hypothetical protein
IOE_RS0115750	GI:503624362, IOE_RS0115750, WP_013858438.1	Bacillus_coagulans_XZL4.RAST (77415/18/1)	gene	hypothetical protein
IOE_RS0115950	GI:518551978, IOE_RS0115950, WP_019722185.1	Bacillus_coagulans_XZL4.RAST (77415/18/1)	gene	hypothetical protein
IOE_RS0116000	GI:518551985, IOE_RS0116000, WP_019722192.1	Bacillus_coagulans_XZL4.RAST (77415/18/1)	gene	hypothetical protein
IOE_RS0116440	GI:518552053, IOE_RS0116440, WP_019722260.1	Bacillus_coagulans_XZL4.RAST (77415/18/1)	gene	hypothetical protein
IOE_RS0116455	GI:518552056, IOE_RS0116455, WP_019722263.1	Bacillus_coagulans_XZL4.RAST (77415/18/1)	gene	hypothetical protein
IOE_RS0116460	GI:518552057, IOE_RS0116460, WP_019722264.1	Bacillus_coagulans_XZL4.RAST (77415/18/1)	gene	hypothetical protein
IOE_RS0116470	GI:656144317, IOE_RS0116470, WP_029141410.1	Bacillus_coagulans_XZL4.RAST (77415/18/1)	gene	hypothetical protein
IOE_RS0116475	GI:518552060, IOE_RS0116475, WP_019722267.1	Bacillus_coagulans_XZL4.RAST (77415/18/1)	gene	hypothetical protein
IOE_RS17795	GI:518552062, IOE_RS17795, WP_019722269.1	Bacillus_coagulans_XZL4.RAST (77415/18/1)	gene	hypothetical protein
IOE_RS0116510	GI:518552067, IOE_RS0116510, WP_019722274.1	Bacillus_coagulans_XZL4.RAST (77415/18/1)	gene	hypothetical protein
IOE_RS0116515	GI:518552068, IOE_RS0116515, WP_019722275.1	Bacillus_coagulans_XZL4.RAST (77415/18/1)	gene	hypothetical protein
IOE_RS0116520	GI:518552069, IOE_RS0116520, WP_019722276.1	Bacillus_coagulans_XZL4.RAST (77415/18/1)	gene	hypothetical protein
IOE_RS0116525	GI:518552070, IOE_RS0116525, WP_019722277.1	Bacillus_coagulans_XZL4.RAST (77415/18/1)	gene	hypothetical protein
IOE_RS0116530	GI:518552071, IOE_RS0116530, WP_019722278.1	Bacillus_coagulans_XZL4.RAST (77415/18/1)	gene	hypothetical protein
P421_RS00005	GI:737202602, P421_00005, P421_RS00005, WP_035187812.1	Bacillus_coagulans_P38.RAST (77415/23/1)	gene	hypothetical protein
P421_RS00010	GI:737202605, P421_00010, P421_RS00010, WP_035187815.1	Bacillus_coagulans_P38.RAST (77415/23/1)	gene	hypothetical protein
P421_RS00015	GI:917435418, P421_00015, P421_RS00015, WP_052042130.1	Bacillus_coagulans_P38.RAST (77415/23/1)	gene	hypothetical protein
P421_RS00025	GI:737202614, P421_00025, P421_RS00025, WP_035187823.1	Bacillus_coagulans_P38.RAST (77415/23/1)	gene	hypothetical protein
P421_RS01020	GI:737202821, P421_01020, P421_RS01020, WP_035188021.1	Bacillus_coagulans_P38.RAST (77415/23/1)	gene	hypothetical protein
P421_RS01115	GI:737202849, P421_01115, P421_RS01115, WP_035188048.1	Bacillus_coagulans_P38.RAST (77415/23/1)	gene	hypothetical protein
P421_RS00045	GI:737202625, P421_00045, P421_RS00045, WP_035187833.1	Bacillus_coagulans_P38.RAST (77415/23/1)	gene	hypothetical protein
P421_RS16845	GI:917516815, P421_RS16845, WP_052123232.1	Bacillus_coagulans_P38.RAST (77415/23/1)	gene	hypothetical protein
P421_RS00075	GI:917516819, P421_RS00075, WP_052123236.1	Bacillus_coagulans_P38.RAST (77415/23/1)	gene	hypothetical protein
P421_RS00080	GI:737202629, P421_00080, P421_RS00080, WP_035187836.1	Bacillus_coagulans_P38.RAST (77415/23/1)	gene	hypothetical protein
P421_RS00085	GI:737202631, P421_00085, P421_RS00085, WP_035187838.1	Bacillus_coagulans_P38.RAST (77415/23/1)	gene	hypothetical protein
P421_RS00090	GI:737202633, P421_00090, P421_RS00090, WP_035187839.1	Bacillus_coagulans_P38.RAST (77415/23/1)	gene	hypothetical protein
P421_RS00095	GI:737202636, P421_00095, P421_RS00095, WP_035187842.1	Bacillus_coagulans_P38.RAST (77415/23/1)	gene	hypothetical protein
P421_RS16850	GI:917516820, P421_RS16850, WP_052123237.1	Bacillus_coagulans_P38.RAST (77415/23/1)	gene	hypothetical protein
P421_RS00110	GI:737202642, P421_00110, P421_RS00110, WP_035187848.1	Bacillus_coagulans_P38.RAST (77415/23/1)	gene	hypothetical protein
P421_RS00115	GI:737202644, P421_00115, P421_RS00115, WP_035187850.1	Bacillus_coagulans_P38.RAST (77415/23/1)	gene	hypothetical protein
P421_RS00120	GI:737202647, P421_00120, P421_RS00120, WP_035187853.1	Bacillus_coagulans_P38.RAST (77415/23/1)	gene	hypothetical protein
P421_RS00125	GI:737202650, P421_00125, P421_RS00125, WP_035187856.1	Bacillus_coagulans_P38.RAST (77415/23/1)	gene	hypothetical protein
P421_RS00130	GI:737202652, P421_00130, P421_RS00130, WP_035187858.1	Bacillus_coagulans_P38.RAST (77415/23/1)	gene	hypothetical protein
P421_RS00135	GI:737202654, P421_00135, P421_RS00135, WP_035187860.1	Bacillus_coagulans_P38.RAST (77415/23/1)	gene	hypothetical protein
P421_RS00140	GI:737202655, P421_00140, P421_RS00140, WP_035187861.1	Bacillus_coagulans_P38.RAST (77415/23/1)	gene	hypothetical protein
P421_RS00145	GI:737202657, P421_00145, P421_RS00145, WP_035187863.1	Bacillus_coagulans_P38.RAST (77415/23/1)	gene	hypothetical protein
P421_RS00150	GI:737202660, P421_00150, P421_RS00150, WP_035187866.1	Bacillus_coagulans_P38.RAST (77415/23/1)	gene	hypothetical protein
P421_RS00155	GI:737202662, P421_00155, P421_RS00155, WP_035187868.1	Bacillus_coagulans_P38.RAST (77415/23/1)	gene	hypothetical protein
P421_RS00165	GI:737202665, P421_00165, P421_RS00165, WP_035187871.1	Bacillus_coagulans_P38.RAST (77415/23/1)	gene	hypothetical protein
P421_RS00170	GI:917516823, P421_RS00170, WP_052123240.1	Bacillus_coagulans_P38.RAST (77415/23/1)	gene	hypothetical protein
P421_RS00175	GI:737202667, P421_00175, P421_RS00175, WP_035187873.1	Bacillus_coagulans_P38.RAST (77415/23/1)	gene	hypothetical protein
P421_RS00180	GI:737202668, P421_00180, P421_RS00180, WP_035187874.1	Bacillus_coagulans_P38.RAST (77415/23/1)	gene	hypothetical protein
P421_RS00185	GI:737202669, P421_00185, P421_RS00185, WP_035187875.1	Bacillus_coagulans_P38.RAST (77415/23/1)	gene	hypothetical protein
P421_RS00190	GI:737202670, P421_00190, P421_RS00190, WP_035187876.1	Bacillus_coagulans_P38.RAST (77415/23/1)	gene	hypothetical protein
P421_RS00200	GI:737202673, P421_00200, P421_RS00200, WP_035187878.1	Bacillus_coagulans_P38.RAST (77415/23/1)	gene	hypothetical protein
P421_RS00205	GI:737202674, P421_00205, P421_RS00205, WP_035187879.1	Bacillus_coagulans_P38.RAST (77415/23/1)	gene	hypothetical protein
P421_RS00220	GI:737202682, P421_00220, P421_RS00220, WP_035187887.1	Bacillus_coagulans_P38.RAST (77415/23/1)	gene	hypothetical protein
P421_RS02500	GI:917516845, P421_RS02500, WP_052123262.1	Bacillus_coagulans_P38.RAST (77415/23/1)	gene	hypothetical protein
P421_RS16870	GI:917516847, P421_RS16870, WP_052123264.1	Bacillus_coagulans_P38.RAST (77415/23/1)	gene	hypothetical protein
P421_RS02520	GI:737203168, P421_02520, P421_RS02520, WP_035188355.1	Bacillus_coagulans_P38.RAST (77415/23/1)	gene	hypothetical protein
P421_RS03565	GI:503625112, P421_03565, P421_RS03565, WP_013859188.1	Bacillus_coagulans_P38.RAST (77415/23/1)	gene	hypothetical protein
P421_RS04025	GI:737203460, P421_04025, P421_RS04025, WP_035188634.1	Bacillus_coagulans_P38.RAST (77415/23/1)	gene	hypothetical protein
P421_RS04785	GI:737203633, P421_04790, P421_RS04785, WP_035188791.1	Bacillus_coagulans_P38.RAST (77415/23/1)	gene	hypothetical protein
P421_RS05440	GI:737203781, P421_05445, P421_RS05440, WP_035188929.1	Bacillus_coagulans_P38.RAST (77415/23/1)	gene	hypothetical protein
P421_RS05625	GI:737203814, P421_05630, P421_RS05625, WP_035188959.1	Bacillus_coagulans_P38.RAST (77415/23/1)	gene	hypothetical protein
P421_RS06335	GI:737203947, P421_06345, P421_RS06335, WP_035189075.1	Bacillus_coagulans_P38.RAST (77415/23/1)	gene	hypothetical protein
P421_RS16875	GI:516121085, P421_RS16875, WP_017551665.1	Bacillus_coagulans_P38.RAST (77415/23/1)	gene	hypothetical protein
P421_RS06725	GI:737204009, P421_06735, P421_RS06725, WP_035189132.1	Bacillus_coagulans_P38.RAST (77415/23/1)	gene	hypothetical protein
P421_RS06890	GI:737204039, P421_06900, P421_RS06890, WP_035189158.1	Bacillus_coagulans_P38.RAST (77415/23/1)	gene	hypothetical protein
P421_RS07265	GI:737204116, P421_07275, P421_RS07265, WP_035189225.1	Bacillus_coagulans_P38.RAST (77415/23/1)	gene	hypothetical protein
P421_RS16885	GI:917516882, P421_RS16885, WP_052123299.1	Bacillus_coagulans_P38.RAST (77415/23/1)	gene	hypothetical protein
P421_RS07320	GI:737204131, P421_07330, P421_RS07320, WP_035189236.1	Bacillus_coagulans_P38.RAST (77415/23/1)	gene	hypothetical protein
P421_RS07330	GI:737204135, P421_07340, P421_RS07330, WP_035189239.1	Bacillus_coagulans_P38.RAST (77415/23/1)	gene	hypothetical protein
P421_RS07970	GI:737200035, P421_07980, P421_RS07970, WP_035185348.1	Bacillus_coagulans_P38.RAST (77415/23/1)	gene	hypothetical protein
P421_RS07975	GI:917435473, P421_07985, P421_RS07975, WP_052042185.1	Bacillus_coagulans_P38.RAST (77415/23/1)	gene	hypothetical protein
P421_RS07985	GI:737197935, P421_07995, P421_RS07985, WP_035183373.1	Bacillus_coagulans_P38.RAST (77415/23/1)	gene	hypothetical protein
P421_RS07995	GI:737197939, P421_08005, P421_RS07995, WP_035183377.1	Bacillus_coagulans_P38.RAST (77415/23/1)	gene	hypothetical protein
P421_RS08050	GI:737204236, P421_08060, P421_RS08050, WP_035189320.1	Bacillus_coagulans_P38.RAST (77415/23/1)	gene	hypothetical protein
P421_RS08200	GI:917516895, P421_RS08200, WP_052123312.1	Bacillus_coagulans_P38.RAST (77415/23/1)	gene	hypothetical protein
P421_RS08460	GI:737204322, P421_08465, P421_RS08460, WP_035189390.1	Bacillus_coagulans_P38.RAST (77415/23/1)	gene	hypothetical protein
P421_RS08505	GI:516119648, P421_08510, P421_RS08505, WP_017550228.1	Bacillus_coagulans_P38.RAST (77415/23/1)	gene	hypothetical protein
P421_RS08980	GI:516119732, P421_08985, P421_RS08980, WP_017550312.1	Bacillus_coagulans_P38.RAST (77415/23/1)	gene	hypothetical protein
P421_RS09215	GI:737204444, P421_09220, P421_RS09215, WP_035189483.1	Bacillus_coagulans_P38.RAST (77415/23/1)	gene	hypothetical protein
P421_RS09335	GI:737204462, P421_09340, P421_RS09335, WP_035189498.1	Bacillus_coagulans_P38.RAST (77415/23/1)	gene	hypothetical protein
P421_RS09360	GI:737204467, P421_09365, P421_RS09360, WP_035189502.1	Bacillus_coagulans_P38.RAST (77415/23/1)	gene	hypothetical protein
P421_RS09725	GI:737204584, P421_09730, P421_RS09725, WP_035189602.1	Bacillus_coagulans_P38.RAST (77415/23/1)	gene	hypothetical protein
P421_RS09730	GI:737204575, P421_09735, P421_RS09730, WP_035189594.1	Bacillus_coagulans_P38.RAST (77415/23/1)	gene	hypothetical protein
P421_RS09740	GI:737204580, P421_09745, P421_RS09740, WP_035189599.1	Bacillus_coagulans_P38.RAST (77415/23/1)	gene	hypothetical protein
P421_RS09750	GI:737204582, P421_09755, P421_RS09750, WP_035189601.1	Bacillus_coagulans_P38.RAST (77415/23/1)	gene	hypothetical protein
P421_RS09965	GI:737204654, P421_09970, P421_RS09965, WP_035189659.1	Bacillus_coagulans_P38.RAST (77415/23/1)	gene	hypothetical protein
P421_RS10095	GI:737204680, P421_10100, P421_RS10095, WP_035189678.1	Bacillus_coagulans_P38.RAST (77415/23/1)	gene	hypothetical protein
P421_RS10260	GI:917516934, P421_10265, P421_RS10260, WP_052123351.1	Bacillus_coagulans_P38.RAST (77415/23/1)	gene	hypothetical protein
P421_RS10275	GI:737204752, P421_10280, P421_RS10275, WP_035189736.1	Bacillus_coagulans_P38.RAST (77415/23/1)	gene	hypothetical protein
P421_RS10840	GI:737204923, P421_10845, P421_RS10840, WP_035189869.1	Bacillus_coagulans_P38.RAST (77415/23/1)	gene	hypothetical protein
P421_RS11205	GI:737204967, P421_11205, P421_RS11205, WP_035189912.1	Bacillus_coagulans_P38.RAST (77415/23/1)	gene	hypothetical protein
P421_RS11210	GI:737204968, P421_11210, P421_RS11210, WP_035189913.1	Bacillus_coagulans_P38.RAST (77415/23/1)	gene	hypothetical protein
P421_RS11215	GI:737204970, P421_11215, P421_RS11215, WP_035189915.1	Bacillus_coagulans_P38.RAST (77415/23/1)	gene	hypothetical protein
P421_RS11220	GI:737204971, P421_11220, P421_RS11220, WP_035189916.1	Bacillus_coagulans_P38.RAST (77415/23/1)	gene	hypothetical protein
P421_RS11240	GI:737204975, P421_11240, P421_RS11240, WP_035189920.1	Bacillus_coagulans_P38.RAST (77415/23/1)	gene	hypothetical protein
P421_RS11290	GI:737204990, P421_11290, P421_RS11290, WP_035189934.1	Bacillus_coagulans_P38.RAST (77415/23/1)	gene	hypothetical protein
P421_RS11695	GI:737199805, P421_11695, P421_RS11695, WP_035185163.1	Bacillus_coagulans_P38.RAST (77415/23/1)	gene	hypothetical protein
P421_RS13025	GI:737205298, P421_13025, P421_RS13025, WP_035190230.1	Bacillus_coagulans_P38.RAST (77415/23/1)	gene	hypothetical protein
P421_RS13190	GI:737205337, P421_13190, P421_RS13190, WP_035190267.1	Bacillus_coagulans_P38.RAST (77415/23/1)	gene	hypothetical protein
P421_RS13195	GI:737205340, P421_13195, P421_RS13195, WP_035190270.1	Bacillus_coagulans_P38.RAST (77415/23/1)	gene	hypothetical protein
P421_RS13200	GI:737205344, P421_13200, P421_RS13200, WP_035190274.1	Bacillus_coagulans_P38.RAST (77415/23/1)	gene	hypothetical protein
P421_RS13205	GI:737205346, P421_13205, P421_RS13205, WP_035190276.1	Bacillus_coagulans_P38.RAST (77415/23/1)	gene	hypothetical protein
P421_RS16925	GI:917516963, P421_RS16925, WP_052123380.1	Bacillus_coagulans_P38.RAST (77415/23/1)	gene	hypothetical protein
P421_RS13535	GI:917516965, P421_13535, P421_RS13535, WP_052123382.1	Bacillus_coagulans_P38.RAST (77415/23/1)	gene	hypothetical protein
P421_RS13550	GI:737205440, P421_13550, P421_RS13550, WP_035190368.1	Bacillus_coagulans_P38.RAST (77415/23/1)	gene	hypothetical protein
P421_RS13670	GI:737197107, P421_13665, P421_RS13670, WP_035182587.1	Bacillus_coagulans_P38.RAST (77415/23/1)	gene	hypothetical protein
P421_RS13750	GI:737205513, P421_13745, P421_RS13750, WP_035190440.1	Bacillus_coagulans_P38.RAST (77415/23/1)	gene	hypothetical protein
P421_RS13985	GI:737205589, P421_13980, P421_RS13985, WP_035190514.1	Bacillus_coagulans_P38.RAST (77415/23/1)	gene	hypothetical protein
P421_RS14055	GI:503624362, P421_14050, P421_RS14055, WP_013858438.1	Bacillus_coagulans_P38.RAST (77415/23/1)	gene	hypothetical protein
P421_RS14605	GI:737205737, P421_14600, P421_RS14605, WP_035190654.1	Bacillus_coagulans_P38.RAST (77415/23/1)	gene	hypothetical protein
P421_RS14790	GI:737205774, P421_14785, P421_RS14790, WP_035190690.1	Bacillus_coagulans_P38.RAST (77415/23/1)	gene	hypothetical protein
P421_RS15500	GI:737205963, P421_15495, P421_RS15500, WP_035190870.1	Bacillus_coagulans_P38.RAST (77415/23/1)	gene	hypothetical protein
P421_RS15530	GI:737196940, P421_15525, P421_RS15530, WP_035182433.1	Bacillus_coagulans_P38.RAST (77415/23/1)	gene	hypothetical protein
P421_RS15550	GI:737205984, P421_15545, P421_RS15550, WP_035190889.1	Bacillus_coagulans_P38.RAST (77415/23/1)	gene	hypothetical protein
P421_RS16120	GI:737206211, P421_RS16120, WP_035191099.1	Bacillus_coagulans_P38.RAST (77415/23/1)	gene	hypothetical protein
P421_RS16140	GI:737206216, P421_16130, P421_RS16140, WP_035191104.1	Bacillus_coagulans_P38.RAST (77415/23/1)	gene	hypothetical protein
P421_RS16295	GI:737206270, P421_16285, P421_RS16295, WP_035191152.1	Bacillus_coagulans_P38.RAST (77415/23/1)	gene	hypothetical protein
P421_RS16375	GI:737206304, P421_16365, P421_RS16375, WP_035191183.1	Bacillus_coagulans_P38.RAST (77415/23/1)	gene	hypothetical protein
P421_RS16380	GI:737206307, P421_16370, P421_RS16380, WP_035191186.1	Bacillus_coagulans_P38.RAST (77415/23/1)	gene	hypothetical protein
P421_RS16385	GI:917516991, P421_16375, P421_RS16385, WP_052123408.1	Bacillus_coagulans_P38.RAST (77415/23/1)	gene	hypothetical protein
P421_RS16390	GI:737206309, P421_16380, P421_RS16390, WP_035191188.1	Bacillus_coagulans_P38.RAST (77415/23/1)	gene	hypothetical protein
P421_RS16945	GI:917516994, P421_RS16945, WP_052123411.1	Bacillus_coagulans_P38.RAST (77415/23/1)	gene	hypothetical protein
P421_RS16410	GI:737206312, P421_16400, P421_RS16410, WP_035191191.1	Bacillus_coagulans_P38.RAST (77415/23/1)	gene	hypothetical protein
P421_RS16500	GI:737206354, P421_16490, P421_RS16500, WP_035191227.1	Bacillus_coagulans_P38.RAST (77415/23/1)	gene	hypothetical protein
P421_RS16570	GI:737206387, P421_16560, P421_RS16570, WP_035191256.1	Bacillus_coagulans_P38.RAST (77415/23/1)	gene	hypothetical protein
P421_RS16595	GI:917516998, P421_RS16595, WP_052123415.1	Bacillus_coagulans_P38.RAST (77415/23/1)	gene	hypothetical protein
P421_RS16635	GI:917517000, P421_RS16635, WP_052123417.1	Bacillus_coagulans_P38.RAST (77415/23/1)	gene	hypothetical protein
P421_RS16650	GI:737206429, P421_16635, P421_RS16650, WP_035191292.1	Bacillus_coagulans_P38.RAST (77415/23/1)	gene	hypothetical protein
P421_RS16765	GI:737206505, P421_16750, P421_RS16765, WP_035191356.1	Bacillus_coagulans_P38.RAST (77415/23/1)	gene	hypothetical protein
P421_RS16770	GI:490715069, P421_RS16770, WP_004577732.1	Bacillus_coagulans_P38.RAST (77415/23/1)	gene	hypothetical protein
P421_RS16815	GI:917517005, P421_RS16815, WP_052123422.1	Bacillus_coagulans_P38.RAST (77415/23/1)	gene	hypothetical protein
C893_RS17780	C893_RS17780, GI:516122775, WP_017553355.1	Bacillus_coagulans_H-1.RAST (77415/22/1)	gene	hypothetical protein BVU_3741
E2E33_011670	E2E33_011670, MBF8418914.1	MA-13_genebank.gb_genome (77415/14/1)	gene	ImmA/IrrE family metallo-endopeptidase
D420_RS0119320	D420_RS0119320, GI:516121739, WP_017552319.1	Bacillus_coagulans_XZL9.RAST (77415/20/1)	gene	Inosose dehydratase (EC 4.2.1.44)
D420_RS0119340	D420_RS0119340, GI:516121742, WP_017552322.1	Bacillus_coagulans_XZL9.RAST (77415/20/1)	gene	Inosose dehydratase (EC 4.2.1.44)
I001_RS19465	GI:916750475, I001_RS19465, WP_051357531.1	Bacillus_coagulans_CSIL1.RAST (77415/19/1)	gene	Integral membrane protein
BCOA_RS26185	BCOA_RS26185, Bcoa_1745, GI:503863036, GeneID:11172030, WP_014097030.1	Bacillus_coagulans_36D1.RAST (77415/16/1)	gene	Iron-sulfur cluster-binding protein
E2E33_010635	E2E33_010635, MBF8418746.1, tnpA	MA-13_genebank.gb_genome (77415/14/1)	gene	IS200/IS605 family transposase
E2E33_014150	E2E33_014150, MBF8419389.1, tnpA	MA-13_genebank.gb_genome (77415/14/1)	gene	IS200/IS605 family transposase
E2E33_002265	E2E33_002265, MBF8417201.1	MA-13_genebank.gb_genome (77415/14/1)	gene	IS5/IS1182 family transposase
E2E33_007150	E2E33_007150, MBF8418103.1	MA-13_genebank.gb_genome (77415/14/1)	gene	IS607 family transposase
E2E33_000970	E2E33_000970, MBF8416962.1	MA-13_genebank.gb_genome (77415/14/1)	gene	ISLre2-like element ISBco6 family transposase
D420_RS0110020	D420_RS0110020, GI:648412840, WP_026104591.1	Bacillus_coagulans_XZL9.RAST (77415/20/1)	gene	L-cystine ABC transporter, permease protein TcyL
D420_RS0110025	D420_RS0110025, GI:516120593, WP_017551173.1	Bacillus_coagulans_XZL9.RAST (77415/20/1)	gene	L-cystine ABC transporter, permease protein TcyM
D420_RS0110010	D420_RS0110010, GI:516120590, WP_017551170.1	Bacillus_coagulans_XZL9.RAST (77415/20/1)	gene	L-cystine ABC transporter, substrate-binding protein TcyJ
D420_RS0110015	D420_RS0110015, GI:516120591, WP_017551171.1	Bacillus_coagulans_XZL9.RAST (77415/20/1)	gene	L-cystine ABC transporter, substrate-binding protein TcyK
C893_RS0107765	C893_RS0107765, GI:648413043, WP_026104794.1	Bacillus_coagulans_H-1.RAST (77415/22/1)	gene	Large subunit terminase
I001_RS0111840	GI:651962240, I001_RS0111840, WP_026684344.1	Bacillus_coagulans_CSIL1.RAST (77415/19/1)	gene	Leucine-responsive regulatory protein, regulator for leucine (or lrp) regulon and high-affinity branched-chain amino acid transport system
BCO26_RS12405	BCO26_RS12405, GI:446176039, WP_000253894.1	Bacillus_coagulans_2-6.RAST (77415/17/1)	gene	Lincosamide nucleotidyltransferase => Lnu(D)
E2E33_003380	E2E33_003380, MBF8417406.1	MA-13_genebank.gb_genome (77415/14/1)	gene	lmo0937 family membrane protein
C893_RS0112110	C893_RS0112110, GI:516123557, WP_017554137.1	Bacillus_coagulans_H-1.RAST (77415/22/1)	gene	Long-chain-fatty-acid--CoA ligase (EC 6.2.1.3)
BCO26_RS08700	BCO26_RS08700, GI:503864019, WP_014098013.1	Bacillus_coagulans_2-6.RAST (77415/17/1)	gene	LSU ribosomal protein L33p @ LSU ribosomal protein L33p, zinc-dependent
BCO26_RS00560	BCO26_RS00560, GI:516120651, WP_017551231.1	Bacillus_coagulans_2-6.RAST (77415/17/1)	gene	LSU ribosomal protein L33p @ LSU ribosomal protein L33p, zinc-dependent
BCOA_RS23170	BCOA_RS23170, GI:516120651, GeneID:23676449, WP_017551231.1	Bacillus_coagulans_36D1.RAST (77415/16/1)	gene	LSU ribosomal protein L33p @ LSU ribosomal protein L33p, zinc-dependent
BCOA_RS31675	BCOA_RS31675, Bcoa_2805, GI:503864019, GeneID:11173734, WP_014098013.1	Bacillus_coagulans_36D1.RAST (77415/16/1)	gene	LSU ribosomal protein L33p @ LSU ribosomal protein L33p, zinc-dependent
BF29_RS11675	BF29_RS11675, GI:516120651, WP_017551231.1	Bacillus_coagulans_DSM_1___ATCC_7050_1.RAST (77415/21/1)	gene	LSU ribosomal protein L33p @ LSU ribosomal protein L33p, zinc-dependent
BF29_RS03785	BF29_757, BF29_RS03785, GI:503864019, WP_014098013.1	Bacillus_coagulans_DSM_1___ATCC_7050_1.RAST (77415/21/1)	gene	LSU ribosomal protein L33p @ LSU ribosomal protein L33p, zinc-dependent
C893_RS0113000	C893_RS0113000, GI:516120651, WP_017551231.1	Bacillus_coagulans_H-1.RAST (77415/22/1)	gene	LSU ribosomal protein L33p @ LSU ribosomal protein L33p, zinc-dependent
C893_RS0113560	C893_RS0113560, GI:503864019, WP_014098013.1	Bacillus_coagulans_H-1.RAST (77415/22/1)	gene	LSU ribosomal protein L33p @ LSU ribosomal protein L33p, zinc-dependent
D420_RS0104425	D420_RS0104425, GI:503864019, WP_014098013.1	Bacillus_coagulans_XZL9.RAST (77415/20/1)	gene	LSU ribosomal protein L33p @ LSU ribosomal protein L33p, zinc-dependent
D420_RS0110620	D420_RS0110620, GI:516120651, WP_017551231.1	Bacillus_coagulans_XZL9.RAST (77415/20/1)	gene	LSU ribosomal protein L33p @ LSU ribosomal protein L33p, zinc-dependent
I001_RS0100395	GI:503864019, I001_RS0100395, WP_014098013.1	Bacillus_coagulans_CSIL1.RAST (77415/19/1)	gene	LSU ribosomal protein L33p @ LSU ribosomal protein L33p, zinc-dependent
IOE_RS0103665	GI:503864019, IOE_RS0103665, WP_014098013.1	Bacillus_coagulans_XZL4.RAST (77415/18/1)	gene	LSU ribosomal protein L33p @ LSU ribosomal protein L33p, zinc-dependent
IOE_RS0114895	GI:516120651, IOE_RS0114895, WP_017551231.1	Bacillus_coagulans_XZL4.RAST (77415/18/1)	gene	LSU ribosomal protein L33p @ LSU ribosomal protein L33p, zinc-dependent
P421_RS00625	GI:503864019, P421_00625, P421_RS00625, WP_014098013.1	Bacillus_coagulans_P38.RAST (77415/23/1)	gene	LSU ribosomal protein L33p @ LSU ribosomal protein L33p, zinc-dependent
P421_RS07555	GI:516120651, P421_07565, P421_RS07555, WP_017551231.1	Bacillus_coagulans_P38.RAST (77415/23/1)	gene	LSU ribosomal protein L33p @ LSU ribosomal protein L33p, zinc-dependent
BCO26_RS15345	BCO26_2975, BCO26_RS15345, GI:489492648, WP_003397591.1	Bacillus_coagulans_2-6.RAST (77415/17/1)	gene	LSU ribosomal protein L34p
BCOA_RS23785	BCOA_RS23785, GI:489492648, GeneID:23676454, WP_003397591.1	Bacillus_coagulans_36D1.RAST (77415/16/1)	gene	LSU ribosomal protein L34p
BF29_RS11060	BF29_RS11060, GI:489492648, WP_003397591.1	Bacillus_coagulans_DSM_1___ATCC_7050_1.RAST (77415/21/1)	gene	LSU ribosomal protein L34p
C893_RS0101465	C893_RS0101465, GI:489492648, WP_003397591.1	Bacillus_coagulans_H-1.RAST (77415/22/1)	gene	LSU ribosomal protein L34p
D420_RS0105650	D420_RS0105650, GI:489492648, WP_003397591.1	Bacillus_coagulans_XZL9.RAST (77415/20/1)	gene	LSU ribosomal protein L34p
I001_RS0103050	GI:489492648, I001_RS0103050, WP_003397591.1	Bacillus_coagulans_CSIL1.RAST (77415/19/1)	gene	LSU ribosomal protein L34p
IOE_RS0101180	GI:489492648, IOE_RS0101180, WP_003397591.1	Bacillus_coagulans_XZL4.RAST (77415/18/1)	gene	LSU ribosomal protein L34p
P421_RS04695	GI:489492648, P421_04695, P421_RS04695, WP_003397591.1	Bacillus_coagulans_P38.RAST (77415/23/1)	gene	LSU ribosomal protein L34p
BCO26_RS00760	BCO26_RS00760, GI:489248396, WP_003156543.1, rpmJ	Bacillus_coagulans_2-6.RAST (77415/17/1)	gene	LSU ribosomal protein L36p @ LSU ribosomal protein L36p, zinc-dependent
BCOA_RS22970	BCOA_RS22970, GI:489248396, GeneID:23676448, WP_003156543.1, rpmJ	Bacillus_coagulans_36D1.RAST (77415/16/1)	gene	LSU ribosomal protein L36p @ LSU ribosomal protein L36p, zinc-dependent
BF29_RS11870	BF29_RS11870, GI:489248396, WP_003156543.1, rpmJ	Bacillus_coagulans_DSM_1___ATCC_7050_1.RAST (77415/21/1)	gene	LSU ribosomal protein L36p @ LSU ribosomal protein L36p, zinc-dependent
C893_RS0111320	C893_RS0111320, GI:489248396, WP_003156543.1, rpmJ	Bacillus_coagulans_H-1.RAST (77415/22/1)	gene	LSU ribosomal protein L36p @ LSU ribosomal protein L36p, zinc-dependent
D420_RS0110415	D420_RS0110415, GI:489248396, WP_003156543.1, rpmJ	Bacillus_coagulans_XZL9.RAST (77415/20/1)	gene	LSU ribosomal protein L36p @ LSU ribosomal protein L36p, zinc-dependent
I001_RS0109790	GI:489248396, I001_RS0109790, WP_003156543.1, rpmJ	Bacillus_coagulans_CSIL1.RAST (77415/19/1)	gene	LSU ribosomal protein L36p @ LSU ribosomal protein L36p, zinc-dependent
IOE_RS0114690	GI:489248396, IOE_RS0114690, WP_003156543.1, rpmJ	Bacillus_coagulans_XZL4.RAST (77415/18/1)	gene	LSU ribosomal protein L36p @ LSU ribosomal protein L36p, zinc-dependent
P421_RS07750	GI:489248396, P421_07760, P421_RS07750, WP_003156543.1, rpmJ	Bacillus_coagulans_P38.RAST (77415/23/1)	gene	LSU ribosomal protein L36p @ LSU ribosomal protein L36p, zinc-dependent
D420_RS0109995	D420_RS0109995, GI:516120587, WP_017551167.1	Bacillus_coagulans_XZL9.RAST (77415/20/1)	gene	LysR-family transcriptional regulator Bsu YtlI
E2E33_011885	E2E33_011885, MBF8418957.1	MA-13_genebank.gb_genome (77415/14/1)	gene	M15 family metallopeptidase
BF29_RS12310	BF29_2535, BF29_RS12310, GI:656148435, WP_029142852.1	Bacillus_coagulans_DSM_1___ATCC_7050_1.RAST (77415/21/1)	gene	main capsid protein Gp34-like protein
BF29_RS12650	BF29_2612, BF29_RS12650, GI:656148435, WP_029142852.1	Bacillus_coagulans_DSM_1___ATCC_7050_1.RAST (77415/21/1)	gene	main capsid protein Gp34-like protein
IOE_RS0101595	GI:518550092, IOE_RS0101595, WP_019720299.1	Bacillus_coagulans_XZL4.RAST (77415/18/1)	gene	Maltose-6'-phosphate glucosidase (EC 3.2.1.122)
IOE_RS0100825	GI:518549993, IOE_RS0100825, WP_019720200.1	Bacillus_coagulans_XZL4.RAST (77415/18/1)	gene	Mannonate dehydratase (EC 4.2.1.8)
C893_RS0116705	C893_RS0116705, GI:648413142, WP_026104893.1	Bacillus_coagulans_H-1.RAST (77415/22/1)	gene	Mannose-1-phosphate guanylyltransferase / Phosphomannomutase (EC 5.4.2.8)
C893_RS0116695	C893_RS0116695, GI:516124218, WP_017554798.1	Bacillus_coagulans_H-1.RAST (77415/22/1)	gene	Mannosyltransferase
BF29_RS04330	BF29_868, BF29_RS04330, GI:656148616, WP_029142913.1	Bacillus_coagulans_DSM_1___ATCC_7050_1.RAST (77415/21/1)	gene	MBL-fold metallo-hydrolase superfamily
BCO26_RS01920	BCO26_0350, BCO26_RS01920, GI:503624232, WP_013858308.1	Bacillus_coagulans_2-6.RAST (77415/17/1)	gene	Membrane protein involved in the export of O-antigen, teichoic acid lipoteichoic acids
C893_RS0101525	C893_RS0101525, GI:516121985, WP_017552565.1	Bacillus_coagulans_H-1.RAST (77415/22/1)	gene	membrane protein, putative
BCO26_RS06820	BCO26_1334, BCO26_RS06820, GI:503625213, WP_013859289.1	Bacillus_coagulans_2-6.RAST (77415/17/1)	gene	Mercuric ion reductase (EC 1.16.1.1)
C893_RS0115080	C893_RS0115080, GI:516123969, WP_017554549.1	Bacillus_coagulans_H-1.RAST (77415/22/1)	gene	Metal-dependent hydrolase
P421_RS00060	GI:737202932, P421_00060, P421_RS00060, WP_035188128.1	Bacillus_coagulans_P38.RAST (77415/23/1)	gene	Metallo-beta-lactamase superfamily domain protein in prophage
C893_RS0113405	C893_RS0113405, GI:916299653, WP_051034699.1	Bacillus_coagulans_H-1.RAST (77415/22/1)	gene	Metalloprotease, putative zinc-binding domain
BCO26_RS14230	BCO26_RS14230, GI:908639525, WP_049783546.1	Bacillus_coagulans_2-6.RAST (77415/17/1)	gene	Mobile element protein
BF29_RS06765	BF29_1353, BF29_RS06765, GI:755163608, WP_042512411.1	Bacillus_coagulans_DSM_1___ATCC_7050_1.RAST (77415/21/1)	gene	Mobile element protein
BF29_RS16980	BF29_1603, BF29_RS16980, GI:918421065, WP_052472241.1	Bacillus_coagulans_DSM_1___ATCC_7050_1.RAST (77415/21/1)	gene	Mobile element protein
BF29_RS08915	BF29_1818, BF29_RS08915, GI:755163608, WP_042512411.1	Bacillus_coagulans_DSM_1___ATCC_7050_1.RAST (77415/21/1)	gene	Mobile element protein
BF29_RS10060	BF29_2055, BF29_RS10060, GI:656149074, WP_029143076.1	Bacillus_coagulans_DSM_1___ATCC_7050_1.RAST (77415/21/1)	gene	Mobile element protein
BF29_RS12005	BF29_2465, BF29_RS12005, GI:755163608, WP_042512411.1	Bacillus_coagulans_DSM_1___ATCC_7050_1.RAST (77415/21/1)	gene	Mobile element protein
C893_RS0103555	C893_RS0103555, GI:516122308, WP_017552888.1	Bacillus_coagulans_H-1.RAST (77415/22/1)	gene	Multidrug and toxin extrusion (MATE) family efflux pump YdhE/NorM, homolog
D420_RS0119325	D420_RS0119325, GI:516121740, WP_017552320.1	Bacillus_coagulans_XZL9.RAST (77415/20/1)	gene	Myo-inositol 2-dehydrogenase (EC 1.1.1.18)
D420_RS0119350	D420_RS0119350, GI:648412937, WP_026104688.1	Bacillus_coagulans_XZL9.RAST (77415/20/1)	gene	Myo-inositol 2-dehydrogenase 1 (EC 1.1.1.18)
I001_RS0114780	GI:651962619, I001_RS0114780, WP_026684703.1	Bacillus_coagulans_CSIL1.RAST (77415/19/1)	gene	N-Acetyl-D-glucosamine ABC transport system, permease protein 1
I001_RS0111495	GI:651962192, I001_RS0111495, WP_026684298.1	Bacillus_coagulans_CSIL1.RAST (77415/19/1)	gene	N-acetyl-D-glucosamine ABC transporter, permease protein 2
C893_RS18495	C893_RS18495, GI:516124184, WP_017554764.1	Bacillus_coagulans_H-1.RAST (77415/22/1)	gene	N-acetylglucosamine-1-phosphate uridyltransferase (EC 2.7.7.23) / Glucosamine-1-phosphate N-acetyltransferase (EC 2.3.1.157)
I001_RS0111510	GI:651962195, I001_RS0111510, WP_026684301.1	Bacillus_coagulans_CSIL1.RAST (77415/19/1)	gene	N-acetylglucosaminyl-L-malate N-acetyl hydrolase
I001_RS19975	GI:916750518, I001_RS19975, WP_051357574.1	Bacillus_coagulans_CSIL1.RAST (77415/19/1)	gene	N-acetylmannosaminyltransferase (EC 2.4.1.187)
IOE_RS0101805	GI:518550121, IOE_RS0101805, WP_019720328.1	Bacillus_coagulans_XZL4.RAST (77415/18/1)	gene	N-acetylmannosaminyltransferase (EC 2.4.1.187)
I001_RS0107420	GI:651961393, I001_RS0107420, WP_026683871.1	Bacillus_coagulans_CSIL1.RAST (77415/19/1)	gene	N-acyl homoserine lactone hydrolase
C893_RS0107720	C893_RS0107720, GI:516122923, WP_017553503.1	Bacillus_coagulans_H-1.RAST (77415/22/1)	gene	N-acyl-L-amino acid amidohydrolase (EC 3.5.1.14)
BCOA_RS30345	BCOA_RS30345, Bcoa_2536, GI:503863773, GeneID:11172810, WP_014097767.1	Bacillus_coagulans_36D1.RAST (77415/16/1)	gene	N-succinyl arginine/lysine racemase
IOE_RS0115995	GI:518551984, IOE_RS0115995, WP_019722191.1	Bacillus_coagulans_XZL4.RAST (77415/18/1)	gene	Nitric-oxide reductase (EC 1.7.99.7), quinol-dependent
BCOA_RS21365	BCOA_RS21365, Bcoa_0828, GI:754205718, GeneID:11174412, WP_041817920.1	Bacillus_coagulans_36D1.RAST (77415/16/1)	gene	NtrC family Transcriptional regulator, ATPase domain
BF29_RS10395	BF29_2125, BF29_RS10395, GI:656149200, WP_029143114.1	Bacillus_coagulans_DSM_1___ATCC_7050_1.RAST (77415/21/1)	gene	O-succinylbenzoate synthase (EC 4.2.1.113)
BCOA_RS30330	BCOA_RS30330, Bcoa_2533, GI:503863770, GeneID:11172807, WP_014097764.1	Bacillus_coagulans_36D1.RAST (77415/16/1)	gene	Oligopeptide ABC transporter, ATP-binding protein OppD (TC 3.A.1.5.1)
BCOA_RS30335	BCOA_RS30335, Bcoa_2534, GI:503863771, GeneID:11172808, WP_014097765.1	Bacillus_coagulans_36D1.RAST (77415/16/1)	gene	Oligopeptide ABC transporter, ATP-binding protein OppF (TC 3.A.1.5.1)
C893_RS0116470	C893_RS0116470, GI:516124182, WP_017554762.1	Bacillus_coagulans_H-1.RAST (77415/22/1)	gene	Oligosaccharide translocase (flippase)
BCOA_RS29100	BCOA_RS29100, Bcoa_2315, GI:503863568, GeneID:11172591, WP_014097562.1	Bacillus_coagulans_36D1.RAST (77415/16/1)	gene	Opine oxidase subunit B
I001_RS0115765	GI:651962738, I001_RS0115765, WP_026684813.1	Bacillus_coagulans_CSIL1.RAST (77415/19/1)	gene	OrfL2
BCO26_RS11010	BCO26_2143, BCO26_RS11010, GI:503626016, WP_013860092.1	Bacillus_coagulans_2-6.RAST (77415/17/1)	gene	Ornithine cyclodeaminase (EC 4.3.1.12)
BF29_RS04385	BF29_879, BF29_RS04385, GI:656148640, WP_029142924.1	Bacillus_coagulans_DSM_1___ATCC_7050_1.RAST (77415/21/1)	gene	OsmC/Ohr family protein
D420_RS0114635	D420_RS0114635, GI:516121153, WP_017551733.1	Bacillus_coagulans_XZL9.RAST (77415/20/1)	gene	Osmosensitive K+ channel histidine kinase KdpD
C893_RS0117185	C893_RS0117185, GI:516124299, WP_017554879.1	Bacillus_coagulans_H-1.RAST (77415/22/1)	gene	Oxidoreductase
E2E33_011790	E2E33_011790, MBF8418938.1	MA-13_genebank.gb_genome (77415/14/1)	gene	P27 family phage terminase small subunit
D420_RS0107910	D420_RS0107910, GI:516120339, WP_017550919.1	Bacillus_coagulans_XZL9.RAST (77415/20/1)	gene	pathogenesis related protein
P421_RS00070	GI:917516817, P421_RS00070, WP_052123234.1	Bacillus_coagulans_P38.RAST (77415/23/1)	gene	penicillin-binding protein
BF29_RS10070	BF29_2057, BF29_RS10070, GI:656149459, WP_029143165.1	Bacillus_coagulans_DSM_1___ATCC_7050_1.RAST (77415/21/1)	gene	Peptidoglycan N-acetylglucosamine deacetylase (EC 3.5.1.-)
BF29_RS10085	BF29_2061, BF29_RS10085, GI:656149459, WP_029143165.1	Bacillus_coagulans_DSM_1___ATCC_7050_1.RAST (77415/21/1)	gene	Peptidoglycan N-acetylglucosamine deacetylase (EC 3.5.1.-)
E2E33_002405	E2E33_002405, MBF8417226.1	MA-13_genebank.gb_genome (77415/14/1)	gene	permease
BF29_RS12180	BF29_2501, BF29_RS12180, GI:737190855, WP_035176503.1	Bacillus_coagulans_DSM_1___ATCC_7050_1.RAST (77415/21/1)	gene	Phage exonuclease (EC 3.1.11.3)
BF29_RS12510	BF29_2577, BF29_RS12510, GI:737190855, WP_035176503.1	Bacillus_coagulans_DSM_1___ATCC_7050_1.RAST (77415/21/1)	gene	Phage exonuclease (EC 3.1.11.3)
E2E33_011820	E2E33_011820, MBF8418944.1	MA-13_genebank.gb_genome (77415/14/1)	gene	phage gp6-like head-tail connector protein
E2E33_011880	E2E33_011880, MBF8418956.1	MA-13_genebank.gb_genome (77415/14/1)	gene	phage holin family protein
E2E33_011815	E2E33_011815, MBF8418943.1	MA-13_genebank.gb_genome (77415/14/1)	gene	phage major capsid protein
BF29_RS12300	BF29_2530, BF29_RS12300, GI:656148438, WP_029142854.1	Bacillus_coagulans_DSM_1___ATCC_7050_1.RAST (77415/21/1)	gene	Phage minor capsid protein
BF29_RS12635	BF29_2607, BF29_RS12635, GI:656148438, WP_029142854.1	Bacillus_coagulans_DSM_1___ATCC_7050_1.RAST (77415/21/1)	gene	Phage minor capsid protein
E2E33_011805	E2E33_011805, MBF8418941.1	MA-13_genebank.gb_genome (77415/14/1)	gene	phage portal protein
BF29_RS12355	BF29_2545, BF29_RS12355, GI:656148373, WP_029142825.1	Bacillus_coagulans_DSM_1___ATCC_7050_1.RAST (77415/21/1)	gene	Phage protein
BF29_RS12695	BF29_2621, BF29_RS12695, GI:656148373, WP_029142825.1	Bacillus_coagulans_DSM_1___ATCC_7050_1.RAST (77415/21/1)	gene	Phage protein
I001_RS0116850	GI:737215817, I001_RS0116850, WP_035200522.1	Bacillus_coagulans_CSIL1.RAST (77415/19/1)	gene	Phage protein
BF29_RS12185	BF29_2502, BF29_RS12185, GI:656148015, WP_029142714.1	Bacillus_coagulans_DSM_1___ATCC_7050_1.RAST (77415/21/1)	gene	Phage recombination protein Bet
BF29_RS12515	BF29_2578, BF29_RS12515, GI:656148015, WP_029142714.1	Bacillus_coagulans_DSM_1___ATCC_7050_1.RAST (77415/21/1)	gene	Phage recombination protein Bet
P421_RS00055	GI:737202930, P421_00055, P421_RS00055, WP_035188127.1	Bacillus_coagulans_P38.RAST (77415/23/1)	gene	Phage recombination protein Bet
BF29_RS17015	BF29_2503, BF29_RS17015, GI:656148017, WP_029142715.1	Bacillus_coagulans_DSM_1___ATCC_7050_1.RAST (77415/21/1)	gene	Phage replication protein
BF29_RS17040	BF29_2579, BF29_RS17040, GI:656148017, WP_029142715.1	Bacillus_coagulans_DSM_1___ATCC_7050_1.RAST (77415/21/1)	gene	Phage replication protein
E2E33_011855	E2E33_011855, MBF8418951.1	MA-13_genebank.gb_genome (77415/14/1)	gene	phage tail family protein
BF29_RS12380	BF29_2550, BF29_RS12380, GI:656148386, WP_029142830.1	Bacillus_coagulans_DSM_1___ATCC_7050_1.RAST (77415/21/1)	gene	Phage tail fiber protein
BF29_RS12720	BF29_2626, BF29_RS12720, GI:656148386, WP_029142830.1	Bacillus_coagulans_DSM_1___ATCC_7050_1.RAST (77415/21/1)	gene	Phage tail fiber protein
BF29_RS12360	BF29_2546, BF29_RS12360, GI:656148376, WP_029142826.1	Bacillus_coagulans_DSM_1___ATCC_7050_1.RAST (77415/21/1)	gene	Phage tail length tape-measure protein T
BF29_RS12700	BF29_2622, BF29_RS12700, GI:656148376, WP_029142826.1	Bacillus_coagulans_DSM_1___ATCC_7050_1.RAST (77415/21/1)	gene	Phage tail length tape-measure protein T
P421_RS16855	GI:917516821, P421_RS16855, WP_052123238.1	Bacillus_coagulans_P38.RAST (77415/23/1)	gene	Phage tail length tape-measure protein T
E2E33_011840	E2E33_011840, MBF8418948.1	MA-13_genebank.gb_genome (77415/14/1)	gene	phage tail protein
E2E33_011860	E2E33_011860, MBF8418952.1	MA-13_genebank.gb_genome (77415/14/1)	gene	phage tail protein
E2E33_011850	E2E33_011850, MBF8418950.1	MA-13_genebank.gb_genome (77415/14/1)	gene	phage tail tape measure protein
BF29_RS12290	BF29_2528, BF29_RS12290, GI:656148441, WP_029142856.1	Bacillus_coagulans_DSM_1___ATCC_7050_1.RAST (77415/21/1)	gene	Phage terminase, large subunit
BF29_RS12625	BF29_2605, BF29_RS12625, GI:656148441, WP_029142856.1	Bacillus_coagulans_DSM_1___ATCC_7050_1.RAST (77415/21/1)	gene	Phage terminase, large subunit
P421_RS00100	GI:917516836, P421_00100, P421_RS00100, WP_052123253.1	Bacillus_coagulans_P38.RAST (77415/23/1)	gene	Phage terminase, large subunit
BF29_RS12285	BF29_2527, BF29_RS12285, GI:656148443, WP_029142857.1	Bacillus_coagulans_DSM_1___ATCC_7050_1.RAST (77415/21/1)	gene	Phage terminase, small subunit
BF29_RS12620	BF29_2604, BF29_RS12620, GI:656148443, WP_029142857.1	Bacillus_coagulans_DSM_1___ATCC_7050_1.RAST (77415/21/1)	gene	Phage terminase, small subunit
BF29_RS12120	BF29_RS12120, GI:658518850, WP_029713864.1	Bacillus_coagulans_DSM_1___ATCC_7050_1.RAST (77415/21/1)	gene	Phage-encoded chromosome degrading nuclease YokF
BF29_RS12450	BF29_RS12450, GI:658518850, WP_029713864.1	Bacillus_coagulans_DSM_1___ATCC_7050_1.RAST (77415/21/1)	gene	Phage-encoded chromosome degrading nuclease YokF
BF29_RS04390	BF29_880, BF29_RS04390, GI:656148642, WP_029142925.1	Bacillus_coagulans_DSM_1___ATCC_7050_1.RAST (77415/21/1)	gene	Phosphate regulon transcriptional regulatory protein PhoB (SphR)
BCO26_RS05525	BCO26_RS05525, GI:754206966, WP_041818933.1	Bacillus_coagulans_2-6.RAST (77415/17/1)	gene	Phosphatidylethanolamine N-methyltransferase (EC 2.1.1.17)
I001_RS0117235	GI:651962896, I001_RS0117235, WP_026684947.1	Bacillus_coagulans_CSIL1.RAST (77415/19/1)	gene	phosphoenolpyruvate-dependent sugar phosphotransferase system EIIC, probable sorbose specific
I001_RS0113585	GI:651962457, I001_RS0113585, WP_026684551.1	Bacillus_coagulans_CSIL1.RAST (77415/19/1)	gene	Phosphoenolpyruvate-dihydroxyacetone phosphotransferase (EC 2.7.1.121), ADP-binding subunit DhaL
I001_RS0113590	GI:651962458, I001_RS0113590, WP_026684552.1	Bacillus_coagulans_CSIL1.RAST (77415/19/1)	gene	Phosphoenolpyruvate-dihydroxyacetone phosphotransferase (EC 2.7.1.121), subunit DhaM,DHA-specific IIA component
BF29_RS10815	BF29_2218, BF29_RS10815, GI:656149503, WP_029143173.1	Bacillus_coagulans_DSM_1___ATCC_7050_1.RAST (77415/21/1)	gene	Phosphoglycerate mutase family 2
BF29_RS14425	BF29_2975, BF29_RS14425, GI:656148111, WP_029142747.1	Bacillus_coagulans_DSM_1___ATCC_7050_1.RAST (77415/21/1)	gene	Phosphonate ABC transporter permease protein phnE1 (TC 3.A.1.9.1)
E2E33_003785	E2E33_003785, MBF8417484.1	MA-13_genebank.gb_genome (77415/14/1)	gene	plasmid recombination protein
BF29_RS06370	BF29_1272, BF29_RS06370, GI:658518814, WP_029713828.1	Bacillus_coagulans_DSM_1___ATCC_7050_1.RAST (77415/21/1)	gene	Polysaccharide intercellular adhesin (PIA) biosynthesis deacetylase IcaB (EC 3.-.-.-)
BF29_RS06365	BF29_1271, BF29_RS06365, GI:658518815, WP_029713829.1	Bacillus_coagulans_DSM_1___ATCC_7050_1.RAST (77415/21/1)	gene	Polysaccharide intercellular adhesin (PIA) biosynthesis protein IcaC
I001_RS0114205	GI:651962539, I001_RS0114205, WP_026684628.1	Bacillus_coagulans_CSIL1.RAST (77415/19/1)	gene	Positive regulator of phenol hydroxylase
IOE_RS0100850	GI:518549998, IOE_RS0100850, WP_019720205.1	Bacillus_coagulans_XZL4.RAST (77415/18/1)	gene	Possible DNA-binding protein
P421_RS13580	GI:737205453, P421_13580, P421_RS13580, WP_035190381.1	Bacillus_coagulans_P38.RAST (77415/23/1)	gene	Predicted 5-dehydro-4-deoxyglucarate regulator YcbG
BCOA_RS29080	BCOA_RS29080, GI:754205920, GeneID:23676538, WP_041818097.1	Bacillus_coagulans_36D1.RAST (77415/16/1)	gene	Predicted transcriptional regulator of N-Acetylglucosamine utilization, GntR family
BCO26_RS05530	BCO26_1067, BCO26_RS05530, GI:503624947, WP_013859023.1	Bacillus_coagulans_2-6.RAST (77415/17/1)	gene	Prolipoprotein diacylglyceryl transferase
BCOA_RS26170	BCOA_RS26170, Bcoa_1742, GI:503863033, GeneID:11172027, WP_014097027.1	Bacillus_coagulans_36D1.RAST (77415/16/1)	gene	Propionate catabolism operon regulatory protein PrpR
I001_RS0107400	GI:651961387, I001_RS0107400, WP_026683868.1	Bacillus_coagulans_CSIL1.RAST (77415/19/1)	gene	Protein of unknown function DUF86, SO_3166 group
I001_RS0117930	GI:651962993, I001_RS0117930, WP_026685017.1	Bacillus_coagulans_CSIL1.RAST (77415/19/1)	gene	PTS system, cellobiose-specific IIB component (EC 2.7.1.205)
I001_RS0117925	GI:651962992, I001_RS0117925, WP_026685016.1	Bacillus_coagulans_CSIL1.RAST (77415/19/1)	gene	PTS system, cellobiose-specific IIC component
I001_RS0111260	GI:651962160, I001_RS0111260, WP_026684267.1	Bacillus_coagulans_CSIL1.RAST (77415/19/1)	gene	PTS system, fructose-specific IIA component (EC 2.7.1.69) / PTS system, fructose-specific IIB component (EC 2.7.1.69) / PTS system, fructose-specific IIC component (EC 2.7.1.69)
I001_RS0111255	GI:651962159, I001_RS0111255, WP_026684266.1	Bacillus_coagulans_CSIL1.RAST (77415/19/1)	gene	PTS system, fructose-specific IIC component / PTS system, fructose-specific IIB component (EC 2.7.1.202)
P421_RS10270	GI:737204732, P421_10275, P421_RS10270, WP_035189720.1	Bacillus_coagulans_P38.RAST (77415/23/1)	gene	PTS system, galactitol-specific IIC component (EC 2.7.1.69)
D420_RS0118980	D420_RS0118980, GI:516121685, WP_017552265.1	Bacillus_coagulans_XZL9.RAST (77415/20/1)	gene	PTS system, mannose-specific IIA component
I001_RS0111320	GI:651962172, I001_RS0111320, WP_026684279.1	Bacillus_coagulans_CSIL1.RAST (77415/19/1)	gene	PTS system, mannose-specific IID component
I001_RS0111315	GI:651962171, I001_RS0111315, WP_026684278.1	Bacillus_coagulans_CSIL1.RAST (77415/19/1)	gene	PTS system, mannose/fructose/sorbose family, IIB component
I001_RS0117230	GI:651962895, I001_RS0117230, WP_026684946.1	Bacillus_coagulans_CSIL1.RAST (77415/19/1)	gene	PTS system, mannose/fructose/sorbose family, IIB component
I001_RS0117240	GI:819383856, I001_RS0117240, WP_046721431.1	Bacillus_coagulans_CSIL1.RAST (77415/19/1)	gene	PTS system, mannose/fructose/sorbose family, IID component
D420_RS0100170	D420_RS0100170, GI:516119527, WP_017550107.1	Bacillus_coagulans_XZL9.RAST (77415/20/1)	gene	Putative ADP-ribose pyrophosphatase YjhB
I001_RS19910	GI:737215525, I001_RS19910, WP_035200230.1	Bacillus_coagulans_CSIL1.RAST (77415/19/1)	gene	Putative antibiotic transport-associated protein
D420_RS19920	D420_RS19920, GI:916304110, WP_051039156.1	Bacillus_coagulans_XZL9.RAST (77415/20/1)	gene	Putative DNA helicase
I001_RS0111310	GI:651962170, I001_RS0111310, WP_026684277.1	Bacillus_coagulans_CSIL1.RAST (77415/19/1)	gene	putative glucosamine-fructose-6-phosphate aminotransferase
D420_RS0110045	D420_RS0110045, GI:516120597, WP_017551177.1	Bacillus_coagulans_XZL9.RAST (77415/20/1)	gene	Putative monooxygenase MoxC
BCOA_RS20200	BCOA_RS20200, Bcoa_0589, GI:754206048, GeneID:11173520, WP_041818209.1	Bacillus_coagulans_36D1.RAST (77415/16/1)	gene	Putative oxidoreductase
P421_RS15330	GI:917516981, P421_RS15330, WP_052123398.1	Bacillus_coagulans_P38.RAST (77415/23/1)	gene	putative oxygenase (putative secreted protein)
C893_RS0105770	C893_RS0105770, GI:516122639, WP_017553219.1	Bacillus_coagulans_H-1.RAST (77415/22/1)	gene	Putative phosphosugar isomerase
C893_RS0112755	C893_RS0112755, GI:516123639, WP_017554219.1	Bacillus_coagulans_H-1.RAST (77415/22/1)	gene	Putative phosphosugar isomerase
IOE_RS0101770	GI:737335399, IOE_RS0101770, WP_035317710.1	Bacillus_coagulans_XZL4.RAST (77415/18/1)	gene	putative polysaccharide biosynthesis protein
IOE_RS16600	GI:518549901, IOE_RS16600, WP_019720108.1	Bacillus_coagulans_XZL4.RAST (77415/18/1)	gene	Putative predicted metal-dependent hydrolase
I001_RS0112570	GI:651962325, I001_RS0112570, WP_026684425.1	Bacillus_coagulans_CSIL1.RAST (77415/19/1)	gene	putative protein
BCO26_RS05520	BCO26_RS05520, GI:754207810, WP_041819647.1	Bacillus_coagulans_2-6.RAST (77415/17/1)	gene	Putative protein-S-isoprenylcysteine methyltransferase
I001_RS0107415	GI:651961391, I001_RS0107415, WP_026683870.1	Bacillus_coagulans_CSIL1.RAST (77415/19/1)	gene	putative sigma-54-dependent transcriptional regulator
P421_RS16520	GI:737206365, P421_16510, P421_RS16520, WP_035191237.1	Bacillus_coagulans_P38.RAST (77415/23/1)	gene	Putative toxin component near putative ESAT-related proteins, repetitive
P421_RS16900	GI:917516919, P421_RS16900, WP_052123336.1	Bacillus_coagulans_P38.RAST (77415/23/1)	gene	Putative toxin component near putative ESAT-related proteins, repetitive / Repetitive hypothetical protein near ESAT cluster, SA0282 homolog
P421_RS16505	GI:917516996, P421_16495, P421_RS16505, WP_052123413.1	Bacillus_coagulans_P38.RAST (77415/23/1)	gene	Putative toxin component near putative ESAT-related proteins, repetitive / Repetitive hypothetical protein near ESAT cluster, SA0282 homolog
BCOA_RS21520	BCOA_RS21520, Bcoa_0864, GI:763172278, GeneID:11174448, WP_044051929.1	Bacillus_coagulans_36D1.RAST (77415/16/1)	gene	Putrescine importer
I001_RS0107320	GI:651961362, I001_RS0107320, WP_026683855.1	Bacillus_coagulans_CSIL1.RAST (77415/19/1)	gene	Pyruvate:Oxaloacetate transcarboxylase domain protein
C893_RS0103225	C893_RS0103225, GI:516122253, WP_017552833.1	Bacillus_coagulans_H-1.RAST (77415/22/1)	gene	Respiratory nitrate reductase alpha chain (EC 1.7.99.4)
BCOA_RS20105	BCOA_RS20105, Bcoa_0569, GI:503861948, GeneID:11173500, WP_014095942.1	Bacillus_coagulans_36D1.RAST (77415/16/1)	gene	Retron-type RNA-directed DNA polymerase (EC 2.7.7.49)
BF29_RS04345	BF29_871, BF29_RS04345, GI:916261441, WP_050996487.1	Bacillus_coagulans_DSM_1___ATCC_7050_1.RAST (77415/21/1)	gene	Rhodanese-like domain protein
E2E33_000090	E2E33_000090, MBF8416809.1	MA-13_genebank.gb_genome (77415/14/1)	gene	ribbon-helix-helix protein, CopG family
E2E33_000645	E2E33_000645, MBF8416907.1	MA-13_genebank.gb_genome (77415/14/1)	gene	ribbon-helix-helix protein, CopG family
C893_RS0114780	C893_RS0114780, GI:516123929, WP_017554509.1	Bacillus_coagulans_H-1.RAST (77415/22/1)	gene	Ribose 5-phosphate isomerase B (EC 5.3.1.6)
E2E33_006140	E2E33_006140, MBF8417917.1	MA-13_genebank.gb_genome (77415/14/1)	gene	Rpn family recombination-promoting nuclease/putative transposase
E2E33_006650	E2E33_006650	MA-13_genebank.gb_genome (77415/14/1)	gene	SagB family peptide dehydrogenase
BCOA_RS29090	BCOA_RS29090, Bcoa_2313, GI:503863566, GeneID:11172589, WP_014097560.1	Bacillus_coagulans_36D1.RAST (77415/16/1)	gene	Sarcosine oxidase alpha subunit (EC 1.5.3.1)
E2E33_001035	E2E33_001035, MBF8416974.1	MA-13_genebank.gb_genome (77415/14/1)	gene	SEC-C domain-containing protein
I001_RS19575	GI:737215198, I001_RS19575, WP_035199903.1	Bacillus_coagulans_CSIL1.RAST (77415/19/1)	gene	sensor histidine kinase
C893_RS0117210	C893_RS0117210, GI:916299662, WP_051034708.1	Bacillus_coagulans_H-1.RAST (77415/22/1)	gene	Serine--pyruvate aminotransferase (EC 2.6.1.51) / L-alanine:glyoxylate aminotransferase (EC 2.6.1.44)
I001_RS0116400	GI:651962815, I001_RS0116400, WP_026684880.1	Bacillus_coagulans_CSIL1.RAST (77415/19/1)	gene	Shikimate kinase I (EC 2.7.1.71)
I001_RS19655	1.1.1.282, GI:916750486, I001_RS19655, WP_051357542.1	Bacillus_coagulans_CSIL1.RAST (77415/19/1)	gene	Shikimate/quinate 5-dehydrogenase I beta (EC 1.1.1.282)
BF29_RS12195	BF29_RS12195, GI:737190849, WP_035176497.1	Bacillus_coagulans_DSM_1___ATCC_7050_1.RAST (77415/21/1)	gene	similar to DNA replication protein
BF29_RS12525	BF29_RS12525, GI:737190849, WP_035176497.1	Bacillus_coagulans_DSM_1___ATCC_7050_1.RAST (77415/21/1)	gene	similar to DNA replication protein
E2E33_002520	E2E33_002520, MBF8417245.1	MA-13_genebank.gb_genome (77415/14/1)	gene	SIR2 family protein
BCOA_RS27375	BCOA_RS27375, Bcoa_1991, GI:503863257, GeneID:11172270, WP_014097251.1	Bacillus_coagulans_36D1.RAST (77415/16/1)	gene	Site-specific recombinase
BCOA_RS27395	BCOA_RS27395, Bcoa_1995, GI:754205879, GeneID:11172274, WP_041818057.1	Bacillus_coagulans_36D1.RAST (77415/16/1)	gene	Site-specific recombinase
BCOA_RS27370	BCOA_RS27370, Bcoa_1990, GI:503863256, GeneID:11172269, WP_014097250.1	Bacillus_coagulans_36D1.RAST (77415/16/1)	gene	Site-specific recombinase for integration and excision
C893_RS0108250	C893_RS0108250, GI:516122990, WP_017553570.1	Bacillus_coagulans_H-1.RAST (77415/22/1)	gene	Site-specific recombinase, resolvase family
C893_RS0113895	C893_RS0113895, GI:757633617, WP_042873419.1	Bacillus_coagulans_H-1.RAST (77415/22/1)	gene	Site-specific tyrosine recombinase
E2E33_007975	E2E33_007975, MBF8418265.1	MA-13_genebank.gb_genome (77415/14/1)	gene	small acid-soluble spore protein O
E2E33_007960	E2E33_007960, MBF8418262.1	MA-13_genebank.gb_genome (77415/14/1)	gene	small acid-soluble spore protein P
E2E33_006180	E2E33_006180, MBF8417925.1, sspL	MA-13_genebank.gb_genome (77415/14/1)	gene	small, acid-soluble spore protein L
BCO26_RS06925	BCO26_1354, BCO26_RS06925, GI:503625233, WP_013859309.1	Bacillus_coagulans_2-6.RAST (77415/17/1)	gene	Small, acid-soluble spore protein N
BCOA_RS33490	BCOA_RS33490, Bcoa_3173, GI:503864363, GeneID:11174099, WP_014098357.1	Bacillus_coagulans_36D1.RAST (77415/16/1)	gene	Small, acid-soluble spore protein N
BF29_RS01880	BF29_369, BF29_RS01880, GI:503625233, WP_013859309.1	Bacillus_coagulans_DSM_1___ATCC_7050_1.RAST (77415/21/1)	gene	Small, acid-soluble spore protein N
C893_RS0100295	C893_RS0100295, GI:503625233, WP_013859309.1	Bacillus_coagulans_H-1.RAST (77415/22/1)	gene	Small, acid-soluble spore protein N
D420_RS0107175	D420_RS0107175, GI:503864363, WP_014098357.1	Bacillus_coagulans_XZL9.RAST (77415/20/1)	gene	Small, acid-soluble spore protein N
I001_RS0102410	GI:503864363, I001_RS0102410, WP_014098357.1	Bacillus_coagulans_CSIL1.RAST (77415/19/1)	gene	Small, acid-soluble spore protein N
IOE_RS0108770	GI:503625233, IOE_RS0108770, WP_013859309.1	Bacillus_coagulans_XZL4.RAST (77415/18/1)	gene	Small, acid-soluble spore protein N
P421_RS05550	GI:503625233, P421_05555, P421_RS05550, WP_013859309.1	Bacillus_coagulans_P38.RAST (77415/23/1)	gene	Small, acid-soluble spore protein N
BCO26_RS06915	BCO26_1351, BCO26_RS06915, GI:503625230, WP_013859306.1, sspO	Bacillus_coagulans_2-6.RAST (77415/17/1)	gene	Small, acid-soluble spore protein O
BCOA_RS33500	BCOA_RS33500, Bcoa_3176, GI:503864366, GeneID:11174102, WP_014098360.1, sspO	Bacillus_coagulans_36D1.RAST (77415/16/1)	gene	Small, acid-soluble spore protein O
BF29_RS01870	BF29_366, BF29_RS01870, GI:503625230, WP_013859306.1, sspO	Bacillus_coagulans_DSM_1___ATCC_7050_1.RAST (77415/21/1)	gene	Small, acid-soluble spore protein O
C893_RS0103180	C893_RS0103180, GI:503625230, WP_013859306.1, sspO	Bacillus_coagulans_H-1.RAST (77415/22/1)	gene	Small, acid-soluble spore protein O
D420_RS0107160	D420_RS0107160, GI:503625230, WP_013859306.1, sspO	Bacillus_coagulans_XZL9.RAST (77415/20/1)	gene	Small, acid-soluble spore protein O
I001_RS0102425	GI:503864366, I001_RS0102425, WP_014098360.1, sspO	Bacillus_coagulans_CSIL1.RAST (77415/19/1)	gene	Small, acid-soluble spore protein O
IOE_RS0108755	GI:503625230, IOE_RS0108755, WP_013859306.1, sspO	Bacillus_coagulans_XZL4.RAST (77415/18/1)	gene	Small, acid-soluble spore protein O
P421_RS05540	GI:503625230, P421_05545, P421_RS05540, WP_013859306.1, sspO	Bacillus_coagulans_P38.RAST (77415/23/1)	gene	Small, acid-soluble spore protein O
E2E33_012665	E2E33_012665, MBF8419109.1	MA-13_genebank.gb_genome (77415/14/1)	gene	SMI1/KNR4 family protein
BCO26_RS05630	BCO26_RS05630, GI:516120916, WP_017551496.1, spoVM	Bacillus_coagulans_2-6.RAST (77415/17/1)	gene	Spore cortex and coat synthesis protein SpoVM
BCOA_RS17680	BCOA_RS17680, GI:516120916, GeneID:23676359, WP_017551496.1, spoVM	Bacillus_coagulans_36D1.RAST (77415/16/1)	gene	Spore cortex and coat synthesis protein SpoVM
BF29_RS00610	BF29_RS00610, GI:516120916, WP_017551496.1, spoVM	Bacillus_coagulans_DSM_1___ATCC_7050_1.RAST (77415/21/1)	gene	Spore cortex and coat synthesis protein SpoVM
C893_RS17525	C893_RS17525, GI:757632126, WP_042871940.1, spoVM	Bacillus_coagulans_H-1.RAST (77415/22/1)	gene	Spore cortex and coat synthesis protein SpoVM
D420_RS20240	D420_RS20240, GI:516120916, WP_017551496.1, spoVM	Bacillus_coagulans_XZL9.RAST (77415/20/1)	gene	Spore cortex and coat synthesis protein SpoVM
I001_RS19845	GI:516120916, I001_RS19845, WP_017551496.1, spoVM	Bacillus_coagulans_CSIL1.RAST (77415/19/1)	gene	Spore cortex and coat synthesis protein SpoVM
IOE_RS17665	GI:516120916, IOE_RS17665, WP_017551496.1, spoVM	Bacillus_coagulans_XZL4.RAST (77415/18/1)	gene	Spore cortex and coat synthesis protein SpoVM
P421_RS11090	GI:516120916, P421_11090, P421_RS11090, WP_017551496.1, spoVM	Bacillus_coagulans_P38.RAST (77415/23/1)	gene	Spore cortex and coat synthesis protein SpoVM
E2E33_008425	E2E33_008425, MBF8418353.1	MA-13_genebank.gb_genome (77415/14/1)	gene	spore protein
E2E33_007510	E2E33_007510, MBF8418174.1	MA-13_genebank.gb_genome (77415/14/1)	gene	sporulation histidine kinase inhibitor Sda
BCO26_RS09130	BCO26_1786, BCO26_RS09130, GI:503625662, WP_013859738.1	Bacillus_coagulans_2-6.RAST (77415/17/1)	gene	Sporulation inhibitor sda
BCOA_RS31255	BCOA_RS31255, Bcoa_2720, GI:503625662, GeneID:11172993, WP_013859738.1	Bacillus_coagulans_36D1.RAST (77415/16/1)	gene	Sporulation inhibitor sda
BF29_RS04175	BF29_836, BF29_RS04175, GI:516122580, WP_017553160.1	Bacillus_coagulans_DSM_1___ATCC_7050_1.RAST (77415/21/1)	gene	Sporulation inhibitor sda
C893_RS0105420	C893_RS0105420, GI:516122580, WP_017553160.1	Bacillus_coagulans_H-1.RAST (77415/22/1)	gene	Sporulation inhibitor sda
D420_RS0104885	D420_RS0104885, GI:503625662, WP_013859738.1	Bacillus_coagulans_XZL9.RAST (77415/20/1)	gene	Sporulation inhibitor sda
I001_RS0103695	GI:503625662, I001_RS0103695, WP_013859738.1	Bacillus_coagulans_CSIL1.RAST (77415/19/1)	gene	Sporulation inhibitor sda
IOE_RS0105420	GI:503625662, IOE_RS0105420, WP_013859738.1	Bacillus_coagulans_XZL4.RAST (77415/18/1)	gene	Sporulation inhibitor sda
P421_RS00240	GI:503625662, P421_00240, P421_RS00240, WP_013859738.1	Bacillus_coagulans_P38.RAST (77415/23/1)	gene	Sporulation inhibitor sda
IOE_RS0111755	GI:518551435, IOE_RS0111755, WP_019721642.1, rpsN	Bacillus_coagulans_XZL4.RAST (77415/18/1)	gene	SSU ribosomal protein S14p (S29e) @ SSU ribosomal protein S14p (S29e), zinc-dependent
E2E33_009755	E2E33_009755, MBF8418582.1, spoVM	MA-13_genebank.gb_genome (77415/14/1)	gene	stage V sporulation protein SpoVM
E2E33_012965	E2E33_012965, MBF8419167.1, prli42	MA-13_genebank.gb_genome (77415/14/1)	gene	stressosome-associated protein Prli42
P421_RS08210	1.2.1.16, GI:737204274, P421_08220, P421_RS08210, WP_035189351.1, gabD	Bacillus_coagulans_P38.RAST (77415/23/1)	gene	Succinate-semialdehyde dehydrogenase [NAD(P)+] (EC 1.2.1.16)
C893_RS0101420	C893_RS0101420, GI:516121968, WP_017552548.1	Bacillus_coagulans_H-1.RAST (77415/22/1)	gene	Superfamily II DNA and RNA helicase
BCO26_RS15125	BCO26_2934, BCO26_RS15125, GI:503626787, WP_013860863.1	Bacillus_coagulans_2-6.RAST (77415/17/1)	gene	Superfamily II helicase
E2E33_011795	E2E33_011795, MBF8418939.1	MA-13_genebank.gb_genome (77415/14/1)	gene	terminase large subunit
BCO26_RS07315	BCO26_1425, BCO26_RS07315, GI:503625301, WP_013859377.1	Bacillus_coagulans_2-6.RAST (77415/17/1)	gene	tetracycline resistance protein tetA(P), putative
D420_RS0115845	D420_RS0115845, GI:516121285, WP_017551865.1	Bacillus_coagulans_XZL9.RAST (77415/20/1)	gene	Thiamine pyridinylase (EC 2.5.1.2)
I001_RS0107315	GI:651961360, I001_RS0107315, WP_026683854.1	Bacillus_coagulans_CSIL1.RAST (77415/19/1)	gene	Thiamine pyrophosphate-requiring enzymes
BF29_RS04395	BF29_881, BF29_RS04395, GI:656148644, WP_029142926.1	Bacillus_coagulans_DSM_1___ATCC_7050_1.RAST (77415/21/1)	gene	Thiol:disulfide oxidoreductase related to ResA
BF29_RS04375	BF29_877, BF29_RS04375, GI:656148636, WP_029142922.1	Bacillus_coagulans_DSM_1___ATCC_7050_1.RAST (77415/21/1)	gene	Thioredoxin
BCOA_RS30340	BCOA_RS30340, Bcoa_2535, GI:503863772, GeneID:11172809, WP_014097766.1	Bacillus_coagulans_36D1.RAST (77415/16/1)	gene	Transcriptional regulator domain protein
I001_RS0113570	GI:651962454, I001_RS0113570, WP_026684548.1	Bacillus_coagulans_CSIL1.RAST (77415/19/1)	gene	Transcriptional regulator, AraC family
BF29_RS08080	BF29_1637, BF29_RS08080, GI:656145551, WP_029141829.1	Bacillus_coagulans_DSM_1___ATCC_7050_1.RAST (77415/21/1)	gene	Transcriptional regulator, GntR family
C893_RS0105775	C893_RS0105775, GI:516122640, WP_017553220.1	Bacillus_coagulans_H-1.RAST (77415/22/1)	gene	Transcriptional regulator, GntR family
C893_RS0105790	C893_RS0105790, GI:516122643, WP_017553223.1	Bacillus_coagulans_H-1.RAST (77415/22/1)	gene	Transcriptional regulator, GntR family
I001_RS0117340	GI:651962910, I001_RS0117340, WP_026684958.1	Bacillus_coagulans_CSIL1.RAST (77415/19/1)	gene	Transcriptional regulator, GntR family
I001_RS0107345	GI:651961369, I001_RS0107345, WP_026683859.1	Bacillus_coagulans_CSIL1.RAST (77415/19/1)	gene	Transcriptional regulator, LysR family
P421_RS13540	GI:737205435, P421_13540, P421_RS13540, WP_035190363.1	Bacillus_coagulans_P38.RAST (77415/23/1)	gene	Transcriptional regulator, LysR family
D420_RS0114495	D420_RS0114495, GI:516121135, WP_017551715.1	Bacillus_coagulans_XZL9.RAST (77415/20/1)	gene	Transcriptional regulator, MarR family
BCO26_RS00875	BCO26_RS00875, GI:754206557, WP_041818604.1	Bacillus_coagulans_2-6.RAST (77415/17/1)	gene	Transcriptional regulator, MerR family
C893_RS0116625	C893_RS0116625, GI:516124209, WP_017554789.1	Bacillus_coagulans_H-1.RAST (77415/22/1)	gene	Transcriptional regulator, MerR family
BCOA_RS20090	BCOA_RS20090, Bcoa_0566, GI:503861945, GeneID:11173497, WP_014095939.1	Bacillus_coagulans_36D1.RAST (77415/16/1)	gene	Transcriptional regulator, Xre family
D420_RS0119370	D420_RS0119370, GI:516121747, WP_017552327.1	Bacillus_coagulans_XZL9.RAST (77415/20/1)	gene	Transcriptional repressor of the myo-inositol catabolic operon DeoR family
BCOA_RS26425	BCOA_RS26425, Bcoa_1796, GI:503863082, GeneID:11172081, WP_014097076.1	Bacillus_coagulans_36D1.RAST (77415/16/1)	gene	Transposase
BF29_RS06740	BF29_1348, BF29_RS06740, GI:755163606, WP_042512409.1	Bacillus_coagulans_DSM_1___ATCC_7050_1.RAST (77415/21/1)	gene	Transposase
BF29_RS07960	BF29_1612, BF29_RS07960, GI:755163616, WP_042512419.1	Bacillus_coagulans_DSM_1___ATCC_7050_1.RAST (77415/21/1)	gene	Transposase
BF29_RS08910	BF29_1816, BF29_RS08910, GI:755163719, WP_042512522.1	Bacillus_coagulans_DSM_1___ATCC_7050_1.RAST (77415/21/1)	gene	Transposase
BF29_RS11995	BF29_2463, BF29_RS11995, GI:918421068, WP_052472244.1	Bacillus_coagulans_DSM_1___ATCC_7050_1.RAST (77415/21/1)	gene	Transposase
C893_RS0107010	C893_RS0107010, GI:516122824, WP_017553404.1	Bacillus_coagulans_H-1.RAST (77415/22/1)	gene	Transposase
E2E33_000230	E2E33_000230, MBF8416833.1	MA-13_genebank.gb_genome (77415/14/1)	gene	transposase
E2E33_002205	E2E33_002205, MBF8417190.1	MA-13_genebank.gb_genome (77415/14/1)	gene	transposase
E2E33_003685	E2E33_003685, MBF8417466.1	MA-13_genebank.gb_genome (77415/14/1)	gene	transposase
E2E33_004530	E2E33_004530	MA-13_genebank.gb_genome (77415/14/1)	gene	transposase
E2E33_005240	E2E33_005240, MBF8417758.1	MA-13_genebank.gb_genome (77415/14/1)	gene	transposase
E2E33_005400	E2E33_005400, MBF8417780.1	MA-13_genebank.gb_genome (77415/14/1)	gene	transposase
E2E33_010600	E2E33_010600, MBF8418740.1	MA-13_genebank.gb_genome (77415/14/1)	gene	transposase
E2E33_013855	E2E33_013855, MBF8419330.1	MA-13_genebank.gb_genome (77415/14/1)	gene	transposase
P421_RS13765	GI:737205519, P421_13760, P421_RS13765, WP_035190446.1	Bacillus_coagulans_P38.RAST (77415/23/1)	gene	Transposase
BF29_RS06760	BF29_1352, BF29_RS06760, GI:918421064, WP_052472240.1	Bacillus_coagulans_DSM_1___ATCC_7050_1.RAST (77415/21/1)	gene	transposase (25)
BCOA_RS34385	BCOA_RS34385, Bcoa_1007, GI:918008944, GeneID:25395570, WP_052301530.1	Bacillus_coagulans_36D1.RAST (77415/16/1)	gene	Transposase, IS4
C893_RS0102920	C893_RS0102920, GI:516122202, WP_017552782.1	Bacillus_coagulans_H-1.RAST (77415/22/1)	gene	Transposase, IS5377 family
D420_RS20645	D420_RS20645, GI:516120460, WP_017551040.1	Bacillus_coagulans_XZL9.RAST (77415/20/1)	gene	Two-component system sensor histidine kinase
I001_RS0113330	GI:651962423, I001_RS0113330, WP_026684518.1	Bacillus_coagulans_CSIL1.RAST (77415/19/1)	gene	Two-component system sensor histidine kinase
BCO26_RS13820	BCO26_RS13820, GI:754207622, WP_041819490.1	Bacillus_coagulans_2-6.RAST (77415/17/1)	gene	Two-component transcriptional response regulator, LuxR family
D420_RS0108845	D420_RS0108845, GI:916304112, WP_051039158.1	Bacillus_coagulans_XZL9.RAST (77415/20/1)	gene	Two-component transcriptional response regulator, LuxR family
I001_RS0113325	GI:651962422, I001_RS0113325, WP_026684517.1	Bacillus_coagulans_CSIL1.RAST (77415/19/1)	gene	Two-component transcriptional response regulator, OmpR family
IOE_RS0100990	GI:518550013, IOE_RS0100990, WP_019720220.1	Bacillus_coagulans_XZL4.RAST (77415/18/1)	gene	Type I restriction-modification system, DNA-methyltransferase subunit M (EC 2.1.1.72)
IOE_RS0101000	GI:518550015, IOE_RS0101000, WP_019720222.1	Bacillus_coagulans_XZL4.RAST (77415/18/1)	gene	Type I restriction-modification system, DNA-methyltransferase subunit M (EC 2.1.1.72)
P421_RS07990	GI:737197937, P421_08000, P421_RS07990, WP_035183375.1	Bacillus_coagulans_P38.RAST (77415/23/1)	gene	Type I restriction-modification system, DNA-methyltransferase subunit M (EC 2.1.1.72)
IOE_RS0100980	GI:518550011, IOE_RS0100980, WP_019720218.1	Bacillus_coagulans_XZL4.RAST (77415/18/1)	gene	Type I restriction-modification system, restriction subunit R (EC 3.1.21.3)
BCOA_RS34410	BCOA_RS34410, Bcoa_1781, GI:503863068, GeneID:25395575, WP_014097062.1	Bacillus_coagulans_36D1.RAST (77415/16/1)	gene	Type I restriction-modification system, specificity subunit S
C893_RS0102630	C893_RS0102630, GI:516122162, WP_017552742.1	Bacillus_coagulans_H-1.RAST (77415/22/1)	gene	Type I restriction-modification system, specificity subunit S
IOE_RS0101950	GI:518550147, IOE_RS0101950, WP_019720354.1	Bacillus_coagulans_XZL4.RAST (77415/18/1)	gene	Type II restriction-modification enzyme, methylase family protein (STM4495 in Salmonella)
E2E33_006050	E2E33_006050, MBF8417901.1	MA-13_genebank.gb_genome (77415/14/1)	gene	type II toxin-antitoxin system PemK/MazF family toxin
BCO26_RS01880	BCO26_0343, BCO26_RS01880, GI:503624225, WP_013858301.1	Bacillus_coagulans_2-6.RAST (77415/17/1)	gene	UDP-glucose 4-epimerase (EC 5.1.3.2)
BCO26_RS01975	BCO26_0360, BCO26_RS01975, GI:754206667, WP_041818692.1	Bacillus_coagulans_2-6.RAST (77415/17/1)	gene	UDP-glucose 6-dehydrogenase (EC 1.1.1.22)
BCO26_RS01905	BCO26_0348, BCO26_RS01905, GI:503624230, WP_013858306.1	Bacillus_coagulans_2-6.RAST (77415/17/1)	gene	UDP-glucuronate 5'-epimerase (EC 5.1.3.12)
D420_RS0107940	D420_RS0107940, GI:516120345, WP_017550925.1	Bacillus_coagulans_XZL9.RAST (77415/20/1)	gene	UDP-N-acetylglucosamine 2-epimerase (EC 5.1.3.14)
BCO26_RS01870	BCO26_0342, BCO26_RS01870, GI:503624224, WP_013858300.1	Bacillus_coagulans_2-6.RAST (77415/17/1)	gene	UDP-N-acetylglucosamine 4,6-dehydratase (EC 4.2.1.135)
P421_RS01840	GI:917516839, P421_RS01840, WP_052123256.1	Bacillus_coagulans_P38.RAST (77415/23/1)	gene	Uncharacterized amino acid permease, GabP family
I001_RS0119270	GI:651963164, I001_RS0119270, WP_026685183.1	Bacillus_coagulans_CSIL1.RAST (77415/19/1)	gene	Uncharacterized glycosyltransferase YkoT
D420_RS20050	D420_RS20050, GI:516120589, WP_017551169.1	Bacillus_coagulans_XZL9.RAST (77415/20/1)	gene	Uncharacterized N-acetyltransferase YtmI
BCO26_RS11755	BCO26_2292, BCO26_RS11755, GI:754207476, WP_041819370.1	Bacillus_coagulans_2-6.RAST (77415/17/1)	gene	Uncharacterized protein BT_4536
I001_RS0116845	GI:651962849, I001_RS0116845, WP_026684908.1	Bacillus_coagulans_CSIL1.RAST (77415/19/1)	gene	Uncharacterized protein Npun_F4007
IOE_RS0101945	GI:518550146, IOE_RS0101945, WP_019720353.1	Bacillus_coagulans_XZL4.RAST (77415/18/1)	gene	Uncharacterized protein sporadically distributed in bacteria and archaea (STM4496 in Salmonella)
IOE_RS0101955	GI:518550148, IOE_RS0101955, WP_019720355.1	Bacillus_coagulans_XZL4.RAST (77415/18/1)	gene	Uncharacterized protein sporadically distributed in bacteria and archaea, PglZ domain
BF29_RS04350	BF29_872, BF29_RS04350, GI:656148624, WP_029142917.1	Bacillus_coagulans_DSM_1___ATCC_7050_1.RAST (77415/21/1)	gene	Uncharacterized protein YrkD
C893_RS0105780	C893_RS0105780, GI:516122641, WP_017553221.1	Bacillus_coagulans_H-1.RAST (77415/22/1)	gene	Uncharacterized sugar kinase, ribokinase family
BF29_RS04340	BF29_870, BF29_RS04340, GI:656148620, WP_029142915.1	Bacillus_coagulans_DSM_1___ATCC_7050_1.RAST (77415/21/1)	gene	UPF0033 protein YrkF
D420_RS0105725	D420_RS0105725, GI:516120103, WP_017550683.1	Bacillus_coagulans_XZL9.RAST (77415/20/1)	gene	UPF0310 protein YdcG
BF29_RS02310	BF29_RS02310, GI:755163577, WP_042512380.1	Bacillus_coagulans_DSM_1___ATCC_7050_1.RAST (77415/21/1)	gene	UPF0721 transmembrane protein YrkJ
IOE_RS0101055	GI:518550026, IOE_RS0101055, WP_019720233.1	Bacillus_coagulans_XZL4.RAST (77415/18/1)	gene	UPF0758 family protein
BCOA_RS21535	BCOA_RS21535, Bcoa_0867, GI:503862233, GeneID:11174451, WP_014096227.1	Bacillus_coagulans_36D1.RAST (77415/16/1)	gene	Urea carboxylase (EC 6.3.4.6)
BCOA_RS21525	BCOA_RS21525, Bcoa_0865, GI:503862231, GeneID:11174449, WP_014096225.1	Bacillus_coagulans_36D1.RAST (77415/16/1)	gene	Urea carboxylase-related aminomethyltransferase
BCOA_RS21530	BCOA_RS21530, Bcoa_0866, GI:503862232, GeneID:11174450, WP_014096226.1	Bacillus_coagulans_36D1.RAST (77415/16/1)	gene	Urea carboxylase-related aminomethyltransferase
I001_RS0112445	GI:737215464, I001_RS0112445, WP_035200169.1	Bacillus_coagulans_CSIL1.RAST (77415/19/1)	gene	Vitamin B12 ABC transporter, ATP-binding protein BtuD
E2E33_011720	E2E33_011720, MBF8418924.1	MA-13_genebank.gb_genome (77415/14/1)	gene	VRR-NUC domain-containing protein
C893_RS0117195	C893_RS0117195, GI:516124301, WP_017554881.1	Bacillus_coagulans_H-1.RAST (77415/22/1)	gene	Xanthine permease
E2E33_011675	E2E33_011675, MBF8418915.1	MA-13_genebank.gb_genome (77415/14/1)	gene	XRE family transcriptional regulator
E2E33_011680	E2E33_011680, MBF8418916.1	MA-13_genebank.gb_genome (77415/14/1)	gene	XRE family transcriptional regulator
D420_RS0119330	D420_RS0119330, GI:516121741, WP_017552321.1	Bacillus_coagulans_XZL9.RAST (77415/20/1)	gene	Xylose isomerase-like TIM-barrel protein YfiH
P421_RS16480	GI:737206340, P421_16470, P421_RS16480, WP_035191217.1	Bacillus_coagulans_P38.RAST (77415/23/1)	gene	Xylulose kinase (EC 2.7.1.17)
E2E33_004755	E2E33_004755, MBF8417666.1	MA-13_genebank.gb_genome (77415/14/1)	gene	YfhE family protein
E2E33_005030	E2E33_005030, MBF8417718.1	MA-13_genebank.gb_genome (77415/14/1)	gene	YhfH family protein
E2E33_008625	E2E33_008625, MBF8418392.1	MA-13_genebank.gb_genome (77415/14/1)	gene	YhfH family protein
E2E33_000560	E2E33_000560, MBF8416892.1	MA-13_genebank.gb_genome (77415/14/1)	gene	YjcZ family sporulation protein
E2E33_003505	E2E33_003505, MBF8417430.1	MA-13_genebank.gb_genome (77415/14/1)	gene	YjcZ family sporulation protein
E2E33_005355	E2E33_005355, MBF8417774.1	MA-13_genebank.gb_genome (77415/14/1)	gene	YjcZ family sporulation protein
E2E33_005795	E2E33_005795, MBF8417853.1	MA-13_genebank.gb_genome (77415/14/1)	gene	YjcZ family sporulation protein
E2E33_008740	E2E33_008740, MBF8418411.1	MA-13_genebank.gb_genome (77415/14/1)	gene	YjcZ family sporulation protein
E2E33_011220	E2E33_011220, MBF8418829.1	MA-13_genebank.gb_genome (77415/14/1)	gene	YjcZ family sporulation protein
E2E33_005630	E2E33_005630, MBF8417822.1	MA-13_genebank.gb_genome (77415/14/1)	gene	YpzG family protein
E2E33_008185	E2E33_008185, MBF8418305.1	MA-13_genebank.gb_genome (77415/14/1)	gene	YpzI family protein
E2E33_013235	E2E33_013235, MBF8419217.1	MA-13_genebank.gb_genome (77415/14/1)	gene	YqzE family protein
E2E33_013450	E2E33_013450, MBF8419260.1	MA-13_genebank.gb_genome (77415/14/1)	gene	YqzL family protein
E2E33_012270	E2E33_012270, MBF8419034.1	MA-13_genebank.gb_genome (77415/14/1)	gene	YqzM family protein
E2E33_007485	E2E33_007485, MBF8418169.1	MA-13_genebank.gb_genome (77415/14/1)	gene	YrzI family small protein
E2E33_007415	E2E33_007415, MBF8418155.1	MA-13_genebank.gb_genome (77415/14/1)	gene	YrzQ family protein
E2E33_003350	E2E33_003350, MBF8417400.1	MA-13_genebank.gb_genome (77415/14/1)	gene	YuzL family protein
E2E33_010945	E2E33_010945, MBF8418797.1	MA-13_genebank.gb_genome (77415/14/1)	gene	YvrJ family protein
E2E33_003590	E2E33_003590, MBF8417447.1, mciZ	MA-13_genebank.gb_genome (77415/14/1)	gene	Z-ring formation inhibitor MciZ

## Sheet: Core
Feature Id	Aliases	Genome	Type	Function
BCO26_RS00005	BCO26_0001, BCO26_RS00005, GI:516121976, WP_017552556.1	Bacillus_coagulans_2-6.RAST (77415/17/1)	gene	Chromosomal replication initiator protein DnaA
BCO26_RS00010	BCO26_0002, BCO26_RS00010, GI:503623891, WP_013857967.1	Bacillus_coagulans_2-6.RAST (77415/17/1)	gene	DNA polymerase III beta subunit (EC 2.7.7.7)
BCO26_RS00085	BCO26_0013, BCO26_RS00085, GI:503623901, WP_013857977.1	Bacillus_coagulans_2-6.RAST (77415/17/1)	gene	Thymidylate kinase (EC 2.7.4.9)
BCO26_RS00590	BCO26_0108, BCO26_RS00590, GI:503623992, WP_013858068.1, rplL	Bacillus_coagulans_2-6.RAST (77415/17/1)	gene	LSU ribosomal protein L7p/L12p (P1/P2)
BCO26_RS05335	BCO26_1030, BCO26_RS05335, GI:503624910, WP_013858986.1	Bacillus_coagulans_2-6.RAST (77415/17/1)	gene	FIG011856: hypothetical protein
BCO26_RS05340	BCO26_RS05340, GI:518551752, WP_019721959.1	Bacillus_coagulans_2-6.RAST (77415/17/1)	gene	Cell wall-binding protein
BCO26_RS05345	BCO26_1032, BCO26_RS05345, GI:503624912, WP_013858988.1	Bacillus_coagulans_2-6.RAST (77415/17/1)	gene	FIG00003370: Multicopper polyphenol oxidase
BCO26_RS05350	BCO26_1033, BCO26_RS05350, GI:503624913, WP_013858989.1	Bacillus_coagulans_2-6.RAST (77415/17/1)	gene	Pyridoxal phosphate-containing protein YggS
BCO26_RS05355	BCO26_1034, BCO26_RS05355, GI:503624914, WP_013858990.1	Bacillus_coagulans_2-6.RAST (77415/17/1)	gene	SepF, FtsZ-interacting protein related to cell division
BCO26_RS05360	BCO26_RS05360, GI:516123592, WP_017554172.1	Bacillus_coagulans_2-6.RAST (77415/17/1)	gene	Cell division integral membrane protein, YggT and half-length relatives
BCO26_RS05365	BCO26_1036, BCO26_RS05365, GI:503624916, WP_013858992.1	Bacillus_coagulans_2-6.RAST (77415/17/1)	gene	Putative RNA-binding protein YlmH
BCO26_RS05370	BCO26_1037, BCO26_RS05370, GI:503624917, WP_013858993.1	Bacillus_coagulans_2-6.RAST (77415/17/1)	gene	Cell division initiation protein DivIVA
BCO26_RS05375	BCO26_1038, BCO26_RS05375, GI:503624918, WP_013858994.1, ileS	Bacillus_coagulans_2-6.RAST (77415/17/1)	gene	Isoleucyl-tRNA synthetase (EC 6.1.1.5)
BCO26_RS05380	BCO26_1039, BCO26_RS05380, GI:503624919, WP_013858995.1	Bacillus_coagulans_2-6.RAST (77415/17/1)	gene	hypothetical protein
BCO26_RS00595	BCO26_0109, BCO26_RS00595, GI:503623993, WP_013858069.1	Bacillus_coagulans_2-6.RAST (77415/17/1)	gene	16S rRNA (guanine(1207)-N(2))-methyltransferase (EC 2.1.1.172)
BCO26_RS05385	BCO26_1040, BCO26_RS05385, GI:737190623, WP_035176271.1	Bacillus_coagulans_2-6.RAST (77415/17/1)	gene	Lipoprotein signal peptidase (EC 3.4.23.36)
BCO26_RS05390	BCO26_1041, BCO26_RS05390, GI:503624921, WP_013858997.1	Bacillus_coagulans_2-6.RAST (77415/17/1)	gene	LSU rRNA pseudouridine(1911/1915/1917) synthase (EC 5.4.99.23)
BCO26_RS05395	BCO26_1042, BCO26_RS05395, GI:503624922, WP_013858998.1	Bacillus_coagulans_2-6.RAST (77415/17/1)	gene	Pyrimidine operon regulatory protein PyrR
BCO26_RS05400	BCO26_1043, BCO26_RS05400, GI:503624923, WP_013858999.1	Bacillus_coagulans_2-6.RAST (77415/17/1)	gene	Aspartate carbamoyltransferase (EC 2.1.3.2)
BCO26_RS05405	BCO26_1044, BCO26_RS05405, GI:503624924, WP_013859000.1	Bacillus_coagulans_2-6.RAST (77415/17/1)	gene	Dihydroorotase (EC 3.5.2.3)
BCO26_RS05410	BCO26_1045, BCO26_RS05410, GI:503624925, WP_013859001.1	Bacillus_coagulans_2-6.RAST (77415/17/1)	gene	Carbamoyl-phosphate synthase small chain (EC 6.3.5.5)
BCO26_RS05415	BCO26_1046, BCO26_RS05415, GI:503624926, WP_013859002.1	Bacillus_coagulans_2-6.RAST (77415/17/1)	gene	Carbamoyl-phosphate synthase large chain (EC 6.3.5.5)
BCO26_RS05425	BCO26_1048, BCO26_RS05425, GI:908639532, WP_049783553.1	Bacillus_coagulans_2-6.RAST (77415/17/1)	gene	Dihydroorotate dehydrogenase (NAD(+)), catalytic subunit (EC 1.3.1.14)
BCO26_RS05430	BCO26_1049, BCO26_RS05430, GI:503624929, WP_013859005.1	Bacillus_coagulans_2-6.RAST (77415/17/1)	gene	Orotidine 5'-phosphate decarboxylase (EC 4.1.1.23)
BCO26_RS00600	BCO26_0110, BCO26_RS00600, GI:516120645, WP_017551225.1	Bacillus_coagulans_2-6.RAST (77415/17/1)	gene	DNA-directed RNA polymerase beta subunit (EC 2.7.7.6)
BCO26_RS05435	BCO26_1050, BCO26_RS05435, GI:503624930, WP_013859006.1	Bacillus_coagulans_2-6.RAST (77415/17/1)	gene	Orotate phosphoribosyltransferase (EC 2.4.2.10)
BCO26_RS05450	BCO26_1052, BCO26_RS05450, GI:503624932, WP_013859008.1	Bacillus_coagulans_2-6.RAST (77415/17/1)	gene	hypothetical protein
BCO26_RS05465	BCO26_1055, BCO26_RS05465, GI:503624935, WP_013859011.1	Bacillus_coagulans_2-6.RAST (77415/17/1)	gene	Methylglyoxal synthase (EC 4.2.3.3)
BCO26_RS05480	BCO26_1058, BCO26_RS05480, GI:754206962, WP_041818929.1	Bacillus_coagulans_2-6.RAST (77415/17/1)	gene	5-formyltetrahydrofolate cyclo-ligase (EC 6.3.3.2)
BCO26_RS05485	BCO26_1059, BCO26_RS05485, GI:503624939, WP_013859015.1	Bacillus_coagulans_2-6.RAST (77415/17/1)	gene	Uncharacterized MFS-type transporter
BCO26_RS00605	BCO26_0111, BCO26_RS00605, GI:503623995, WP_013858071.1	Bacillus_coagulans_2-6.RAST (77415/17/1)	gene	DNA-directed RNA polymerase beta' subunit (EC 2.7.7.6)
BCO26_RS05495	BCO26_1062, BCO26_RS05495, GI:503624942, WP_013859018.1	Bacillus_coagulans_2-6.RAST (77415/17/1)	gene	Uncharacterized UPF0118 membrane protein
BCO26_RS05545	BCO26_1070, BCO26_RS05545, GI:503624950, WP_013859026.1	Bacillus_coagulans_2-6.RAST (77415/17/1)	gene	Uncharacterized sodium-dependent transporter YocS
BCO26_RS05550	BCO26_1072, BCO26_RS05550, GI:503624952, WP_013859028.1	Bacillus_coagulans_2-6.RAST (77415/17/1)	gene	Fibronectin/fibrinogen-binding protein
BCO26_RS00610	BCO26_0112, BCO26_RS00610, GI:503623996, WP_013858072.1	Bacillus_coagulans_2-6.RAST (77415/17/1)	gene	Firmicutes ribosomal L7Ae family protein
BCO26_RS05555	BCO26_1073, BCO26_RS05555, GI:503624953, WP_013859029.1	Bacillus_coagulans_2-6.RAST (77415/17/1)	gene	P-type Ca(2+)-transport ATPase (EC 3.6.3.8)
BCO26_RS05560	BCO26_1074, BCO26_RS05560, GI:754206969, WP_041818935.1	Bacillus_coagulans_2-6.RAST (77415/17/1)	gene	UPF0701 protein YicC
BCO26_RS05565	BCO26_1075, BCO26_RS05565, GI:754206971, WP_041818937.1	Bacillus_coagulans_2-6.RAST (77415/17/1)	gene	UPF0296 protein YlzA
BCO26_RS05570	BCO26_1076, BCO26_RS05570, GI:503624956, WP_013859032.1	Bacillus_coagulans_2-6.RAST (77415/17/1)	gene	Guanylate kinase (EC 2.7.4.8)
BCO26_RS05575	BCO26_1077, BCO26_RS05575, GI:503624957, WP_013859033.1	Bacillus_coagulans_2-6.RAST (77415/17/1)	gene	DNA-directed RNA polymerase omega subunit (EC 2.7.7.6)
BCO26_RS05580	BCO26_1078, BCO26_RS05580, GI:503624958, WP_013859034.1	Bacillus_coagulans_2-6.RAST (77415/17/1)	gene	Phosphopantothenoylcysteine decarboxylase (EC 4.1.1.36) / Phosphopantothenoylcysteine synthetase (EC 6.3.2.5)
BCO26_RS05585	BCO26_1079, BCO26_RS05585, GI:503624959, WP_013859035.1	Bacillus_coagulans_2-6.RAST (77415/17/1)	gene	Helicase PriA essential for oriC/DnaA-independent DNA replication
BCO26_RS05590	BCO26_1080, BCO26_RS05590, GI:503624960, WP_013859036.1	Bacillus_coagulans_2-6.RAST (77415/17/1)	gene	Peptide deformylase (EC 3.5.1.88)
BCO26_RS05595	BCO26_1081, BCO26_RS05595, GI:503624961, WP_013859037.1	Bacillus_coagulans_2-6.RAST (77415/17/1)	gene	Methionyl-tRNA formyltransferase (EC 2.1.2.9)
BCO26_RS05600	BCO26_1082, BCO26_RS05600, GI:503624962, WP_013859038.1	Bacillus_coagulans_2-6.RAST (77415/17/1)	gene	16S rRNA (cytosine(967)-C(5))-methyltransferase (EC 2.1.1.176)
BCO26_RS00615	BCO26_RS00615, GI:516120642, WP_017551222.1	Bacillus_coagulans_2-6.RAST (77415/17/1)	gene	SSU ribosomal protein S12p (S23e)
BCO26_RS05605	BCO26_1083, BCO26_RS05605, GI:754206974, WP_041818939.1	Bacillus_coagulans_2-6.RAST (77415/17/1)	gene	Protein serine/threonine phosphatase PrpC, regulation of stationary phase
BCO26_RS05610	BCO26_1084, BCO26_RS05610, GI:503624964, WP_013859040.1	Bacillus_coagulans_2-6.RAST (77415/17/1)	gene	Serine/threonine protein kinase PrkC, regulator of stationary phase
BCO26_RS05615	BCO26_1085, BCO26_RS05615, GI:503624965, WP_013859041.1	Bacillus_coagulans_2-6.RAST (77415/17/1)	gene	Ribosome small subunit biogenesis RbfA-release protein RsgA
BCO26_RS05620	BCO26_RS05620, GI:754206977, WP_041818942.1	Bacillus_coagulans_2-6.RAST (77415/17/1)	gene	Ribulose-phosphate 3-epimerase (EC 5.1.3.1)
BCO26_RS05625	BCO26_1088, BCO26_RS05625, GI:503624968, WP_013859044.1	Bacillus_coagulans_2-6.RAST (77415/17/1)	gene	Thiamin pyrophosphokinase (EC 2.7.6.2)
BCO26_RS05635	BCO26_1089, BCO26_RS05635, GI:503624969, WP_013859045.1	Bacillus_coagulans_2-6.RAST (77415/17/1)	gene	LSU ribosomal protein L28p @ LSU ribosomal protein L28p, zinc-independent
BCO26_RS05640	BCO26_1090, BCO26_RS05640, GI:503624970, WP_013859046.1	Bacillus_coagulans_2-6.RAST (77415/17/1)	gene	FIG001802: Putative alkaline-shock protein
BCO26_RS05645	BCO26_1091, BCO26_RS05645, GI:908639533, WP_049783554.1	Bacillus_coagulans_2-6.RAST (77415/17/1)	gene	Dihydroxyacetone kinase-like protein, phosphatase domain / Dihydroxyacetone kinase-like protein, kinase domain
BCO26_RS00620	BCO26_0114, BCO26_RS00620, GI:503623998, WP_013858074.1	Bacillus_coagulans_2-6.RAST (77415/17/1)	gene	SSU ribosomal protein S7p (S5e)
BCO26_RS05655	BCO26_1092, BCO26_RS05655, GI:503624972, WP_013859048.1	Bacillus_coagulans_2-6.RAST (77415/17/1)	gene	L-serine dehydratase, beta subunit (EC 4.3.1.17)
BCO26_RS05660	BCO26_1093, BCO26_RS05660, GI:503624973, WP_013859049.1	Bacillus_coagulans_2-6.RAST (77415/17/1)	gene	L-serine dehydratase, alpha subunit (EC 4.3.1.17)
BCO26_RS05665	BCO26_1094, BCO26_RS05665, GI:754206985, WP_041818948.1	Bacillus_coagulans_2-6.RAST (77415/17/1)	gene	ATP-dependent DNA helicase RecG (EC 3.6.4.12)
BCO26_RS05670	BCO26_1095, BCO26_RS05670, GI:503624975, WP_013859051.1	Bacillus_coagulans_2-6.RAST (77415/17/1)	gene	Transcription factor FapR
BCO26_RS05675	BCO26_1096, BCO26_RS05675, GI:503624976, WP_013859052.1	Bacillus_coagulans_2-6.RAST (77415/17/1)	gene	Phosphate:acyl-ACP acyltransferase PlsX (EC 2.3.1.n2)
BCO26_RS05680	BCO26_1097, BCO26_RS05680, GI:656146918, WP_029142347.1	Bacillus_coagulans_2-6.RAST (77415/17/1)	gene	Malonyl CoA-acyl carrier protein transacylase (EC 2.3.1.39)
BCO26_RS05685	BCO26_1098, BCO26_RS05685, GI:503624978, WP_013859054.1	Bacillus_coagulans_2-6.RAST (77415/17/1)	gene	3-oxoacyl-[acyl-carrier protein] reductase (EC 1.1.1.100), FadG
BCO26_RS05690	BCO26_1099, BCO26_RS05690, GI:503624979, WP_013859055.1	Bacillus_coagulans_2-6.RAST (77415/17/1)	gene	Acyl carrier protein
BCO26_RS05695	BCO26_1100, BCO26_RS05695, GI:503624980, WP_013859056.1	Bacillus_coagulans_2-6.RAST (77415/17/1)	gene	Ribonuclease III (EC 3.1.26.3)
BCO26_RS05700	BCO26_1101, BCO26_RS05700, GI:503624981, WP_013859057.1	Bacillus_coagulans_2-6.RAST (77415/17/1)	gene	Chromosome partition protein smc
BCO26_RS00625	BCO26_0116, BCO26_RS00625, GI:516120641, WP_017551221.1, fusA	Bacillus_coagulans_2-6.RAST (77415/17/1)	gene	Translation elongation factor G
BCO26_RS05705	BCO26_1103, BCO26_RS05705, GI:503624983, WP_013859059.1	Bacillus_coagulans_2-6.RAST (77415/17/1)	gene	Signal recognition particle receptor FtsY
BCO26_RS05710	BCO26_1104, BCO26_RS05710, GI:503624984, WP_013859060.1	Bacillus_coagulans_2-6.RAST (77415/17/1)	gene	Signal recognition particle associated protein
BCO26_RS05715	BCO26_1105, BCO26_RS05715, GI:503624985, WP_013859061.1	Bacillus_coagulans_2-6.RAST (77415/17/1)	gene	Signal recognition particle protein Ffh
BCO26_RS05720	BCO26_1106, BCO26_RS05720, GI:648413117, WP_026104868.1, rpsP	Bacillus_coagulans_2-6.RAST (77415/17/1)	gene	SSU ribosomal protein S16p
BCO26_RS05725	BCO26_1107, BCO26_RS05725, GI:648413118, WP_026104869.1	Bacillus_coagulans_2-6.RAST (77415/17/1)	gene	KH domain RNA binding protein YlqC
BCO26_RS05730	BCO26_1108, BCO26_RS05730, GI:503624988, WP_013859064.1	Bacillus_coagulans_2-6.RAST (77415/17/1)	gene	FIG01228237: hypothetical protein
BCO26_RS05735	BCO26_1109, BCO26_RS05735, GI:503624989, WP_013859065.1	Bacillus_coagulans_2-6.RAST (77415/17/1)	gene	16S rRNA processing protein RimM
BCO26_RS05740	BCO26_1110, BCO26_RS05740, GI:503624990, WP_013859066.1	Bacillus_coagulans_2-6.RAST (77415/17/1)	gene	tRNA (guanine(37)-N(1))-methyltransferase (EC 2.1.1.228)
BCO26_RS05745	BCO26_1111, BCO26_RS05745, GI:503624991, WP_013859067.1	Bacillus_coagulans_2-6.RAST (77415/17/1)	gene	LSU ribosomal protein L19p
BCO26_RS05750	BCO26_1112, BCO26_RS05750, GI:503624992, WP_013859068.1	Bacillus_coagulans_2-6.RAST (77415/17/1)	gene	Signal peptidase I (EC 3.4.21.89)
BCO26_RS00630	BCO26_0117, BCO26_RS00630, GI:503624001, WP_013858077.1, tuf	Bacillus_coagulans_2-6.RAST (77415/17/1)	gene	Translation elongation factor Tu
BCO26_RS05755	BCO26_1113, BCO26_RS05755, GI:754206987, WP_041818950.1	Bacillus_coagulans_2-6.RAST (77415/17/1)	gene	LSU ribosomal maturation GTPase RbgA (B. subtilis YlqF)
BCO26_RS05760	BCO26_1114, BCO26_RS05760, GI:908639534, WP_049783555.1	Bacillus_coagulans_2-6.RAST (77415/17/1)	gene	Ribonuclease HII (EC 3.1.26.4)
BCO26_RS05770	BCO26_1116, BCO26_RS05770, GI:503624996, WP_013859072.1	Bacillus_coagulans_2-6.RAST (77415/17/1)	gene	Flagellar biosynthesis protein FlhB
BCO26_RS05775	BCO26_1117, BCO26_RS05775, GI:503624997, WP_013859073.1, sucC	Bacillus_coagulans_2-6.RAST (77415/17/1)	gene	Succinyl-CoA ligase [ADP-forming] beta chain (EC 6.2.1.5)
BCO26_RS05780	BCO26_1118, BCO26_RS05780, GI:754206991, WP_041818953.1	Bacillus_coagulans_2-6.RAST (77415/17/1)	gene	Succinyl-CoA ligase [ADP-forming] alpha chain (EC 6.2.1.5)
BCO26_RS05785	BCO26_1119, BCO26_RS05785, GI:503624999, WP_013859075.1	Bacillus_coagulans_2-6.RAST (77415/17/1)	gene	Rossmann fold nucleotide-binding protein Smf possibly involved in DNA uptake
BCO26_RS05800	BCO26_1123, BCO26_RS05800, GI:503625003, WP_013859079.1	Bacillus_coagulans_2-6.RAST (77415/17/1)	gene	Site-specific tyrosine recombinase XerC
BCO26_RS05805	BCO26_1124, BCO26_RS05805, GI:503625004, WP_013859080.1	Bacillus_coagulans_2-6.RAST (77415/17/1)	gene	ATP-dependent protease subunit HslV (EC 3.4.25.2)
BCO26_RS05810	BCO26_1125, BCO26_RS05810, GI:503625005, WP_013859081.1	Bacillus_coagulans_2-6.RAST (77415/17/1)	gene	ATP-dependent hsl protease ATP-binding subunit HslU
BCO26_RS05815	BCO26_1126, BCO26_RS05815, GI:503625006, WP_013859082.1	Bacillus_coagulans_2-6.RAST (77415/17/1)	gene	GTP-sensing transcriptional pleiotropic repressor CodY
BCO26_RS05820	BCO26_1127, BCO26_RS05820, GI:503625007, WP_013859083.1	Bacillus_coagulans_2-6.RAST (77415/17/1)	gene	Flagellar basal-body rod protein FlgB
BCO26_RS05825	BCO26_1128, BCO26_RS05825, GI:503625008, WP_013859084.1	Bacillus_coagulans_2-6.RAST (77415/17/1)	gene	Flagellar basal-body rod protein FlgC
BCO26_RS05830	BCO26_RS05830, GI:754206997, WP_041818958.1	Bacillus_coagulans_2-6.RAST (77415/17/1)	gene	Flagellar hook-basal body complex protein FliE
BCO26_RS05835	BCO26_1131, BCO26_RS05835, GI:754206999, WP_041818960.1	Bacillus_coagulans_2-6.RAST (77415/17/1)	gene	Flagellar M-ring protein FliF
BCO26_RS05840	BCO26_1132, BCO26_RS05840, GI:503625012, WP_013859088.1	Bacillus_coagulans_2-6.RAST (77415/17/1)	gene	Flagellar motor switch protein FliG
BCO26_RS05845	BCO26_1133, BCO26_RS05845, GI:503861459, WP_014095453.1	Bacillus_coagulans_2-6.RAST (77415/17/1)	gene	hypothetical protein
BCO26_RS05850	BCO26_1134, BCO26_RS05850, GI:503625014, WP_013859090.1, fliI	Bacillus_coagulans_2-6.RAST (77415/17/1)	gene	Flagellum-specific ATP synthase FliI
BCO26_RS00090	BCO26_0014, BCO26_RS00090, GI:503623902, WP_013857978.1	Bacillus_coagulans_2-6.RAST (77415/17/1)	gene	protein from nitrogen regulatory protein P-II (GLNB) family, ortholog YAAQ B. subtilis
BCO26_RS00640	BCO26_0118, BCO26_RS00640, GI:503624002, WP_013858078.1	Bacillus_coagulans_2-6.RAST (77415/17/1)	gene	SSU ribosomal protein S10p (S20e)
BCO26_RS05855	BCO26_1135, BCO26_RS05855, GI:503625015, WP_013859091.1, fliJ	Bacillus_coagulans_2-6.RAST (77415/17/1)	gene	hypothetical protein
BCO26_RS05860	BCO26_1136, BCO26_RS05860, GI:503625016, WP_013859092.1	Bacillus_coagulans_2-6.RAST (77415/17/1)	gene	Flagellar protein FlbB
BCO26_RS05865	BCO26_1137, BCO26_RS05865, GI:503625017, WP_013859093.1	Bacillus_coagulans_2-6.RAST (77415/17/1)	gene	hypothetical protein
BCO26_RS05870	BCO26_1138, BCO26_RS05870, GI:503625018, WP_013859094.1	Bacillus_coagulans_2-6.RAST (77415/17/1)	gene	Flagellar basal-body rod modification protein FlgD
BCO26_RS05875	BCO26_RS05875, GI:754207002, WP_041818962.1	Bacillus_coagulans_2-6.RAST (77415/17/1)	gene	Flagellar operon protein CA_C2155
BCO26_RS05880	BCO26_1140, BCO26_RS05880, GI:503625020, WP_013859096.1, flgG	Bacillus_coagulans_2-6.RAST (77415/17/1)	gene	Flagellar hook protein FlgE
BCO26_RS05885	BCO26_RS05885, GI:754207004, WP_041818964.1	Bacillus_coagulans_2-6.RAST (77415/17/1)	gene	hypothetical protein
BCO26_RS05890	BCO26_1142, BCO26_RS05890, GI:503625022, WP_013859098.1, fliL	Bacillus_coagulans_2-6.RAST (77415/17/1)	gene	hypothetical protein
BCO26_RS05895	BCO26_1143, BCO26_RS05895, GI:503625023, WP_013859099.1	Bacillus_coagulans_2-6.RAST (77415/17/1)	gene	Flagellar motor switch protein FliM
BCO26_RS05900	BCO26_1144, BCO26_RS05900, GI:503625024, WP_013859100.1	Bacillus_coagulans_2-6.RAST (77415/17/1)	gene	Flagellar motor switch protein FliN
BCO26_RS00645	BCO26_0119, BCO26_RS00645, GI:503624003, WP_013858079.1	Bacillus_coagulans_2-6.RAST (77415/17/1)	gene	LSU ribosomal protein L3p (L3e)
BCO26_RS05905	BCO26_1145, BCO26_RS05905, GI:503625025, WP_013859101.1	Bacillus_coagulans_2-6.RAST (77415/17/1)	gene	Chemotaxis regulator - transmits chemoreceptor signals to flagellar motor components CheY
BCO26_RS05910	BCO26_1146, BCO26_RS05910, GI:503625026, WP_013859102.1	Bacillus_coagulans_2-6.RAST (77415/17/1)	gene	hypothetical protein
BCO26_RS05915	BCO26_1147, BCO26_RS05915, GI:503625027, WP_013859103.1	Bacillus_coagulans_2-6.RAST (77415/17/1)	gene	Flagellar biosynthesis protein FliP
BCO26_RS05920	BCO26_1148, BCO26_RS05920, GI:503861446, WP_014095440.1	Bacillus_coagulans_2-6.RAST (77415/17/1)	gene	Flagellar biosynthesis protein FliQ
BCO26_RS05925	BCO26_1149, BCO26_RS05925, GI:503625029, WP_013859105.1	Bacillus_coagulans_2-6.RAST (77415/17/1)	gene	Flagellar biosynthesis protein FliR
BCO26_RS05930	BCO26_1150, BCO26_RS05930, GI:754207812, WP_041819649.1	Bacillus_coagulans_2-6.RAST (77415/17/1)	gene	Flagellar biosynthesis protein FlhB
BCO26_RS05935	BCO26_1152, BCO26_RS05935, GI:754207006, WP_041818965.1, flhA	Bacillus_coagulans_2-6.RAST (77415/17/1)	gene	Flagellar biosynthesis protein FlhA
BCO26_RS05940	BCO26_1153, BCO26_RS05940, GI:503625033, WP_013859109.1	Bacillus_coagulans_2-6.RAST (77415/17/1)	gene	Flagellar biosynthesis protein FlhF
BCO26_RS05945	BCO26_1154, BCO26_RS05945, GI:503625034, WP_013859110.1	Bacillus_coagulans_2-6.RAST (77415/17/1)	gene	Flagellar synthesis regulator FleN
BCO26_RS05950	BCO26_RS05950, GI:908639512, WP_049783533.1	Bacillus_coagulans_2-6.RAST (77415/17/1)	gene	Chemotaxis response regulator protein-glutamate methylesterase CheB (EC 3.1.1.61)
BCO26_RS00650	BCO26_0120, BCO26_RS00650, GI:503624004, WP_013858080.1	Bacillus_coagulans_2-6.RAST (77415/17/1)	gene	LSU ribosomal protein L4p (L1e)
BCO26_RS05955	BCO26_1156, BCO26_RS05955, GI:503625036, WP_013859112.1	Bacillus_coagulans_2-6.RAST (77415/17/1)	gene	Signal transduction histidine kinase CheA
BCO26_RS05960	BCO26_1157, BCO26_RS05960, GI:503625037, WP_013859113.1	Bacillus_coagulans_2-6.RAST (77415/17/1)	gene	Positive regulator of CheA protein activity (CheW)
BCO26_RS05965	BCO26_1158, BCO26_RS05965, GI:503625038, WP_013859114.1	Bacillus_coagulans_2-6.RAST (77415/17/1)	gene	Chemotaxis protein CheC -- inhibitor of MCP methylation
BCO26_RS05970	BCO26_1159, BCO26_RS05970, GI:516123907, WP_017554487.1	Bacillus_coagulans_2-6.RAST (77415/17/1)	gene	Chemotaxis protein CheD
BCO26_RS05975	BCO26_1160, BCO26_RS05975, GI:503625040, WP_013859116.1	Bacillus_coagulans_2-6.RAST (77415/17/1)	gene	RNA polymerase sigma factor for flagellar operon
BCO26_RS05980	BCO26_RS05980, GI:754207008, WP_041818967.1	Bacillus_coagulans_2-6.RAST (77415/17/1)	gene	FIG01231449: hypothetical protein
BCO26_RS05985	BCO26_1162, BCO26_RS05985, GI:503625042, WP_013859118.1	Bacillus_coagulans_2-6.RAST (77415/17/1)	gene	SSU ribosomal protein S2p (SAe)
BCO26_RS05990	BCO26_1163, BCO26_RS05990, GI:503625043, WP_013859119.1	Bacillus_coagulans_2-6.RAST (77415/17/1)	gene	Translation elongation factor Ts
BCO26_RS05995	BCO26_1164, BCO26_RS05995, GI:503625044, WP_013859120.1, pyrH	Bacillus_coagulans_2-6.RAST (77415/17/1)	gene	Uridylate kinase (EC 2.7.4.22)
BCO26_RS06000	BCO26_1165, BCO26_RS06000, GI:648413119, WP_026104870.1	Bacillus_coagulans_2-6.RAST (77415/17/1)	gene	Ribosome recycling factor
BCO26_RS00655	BCO26_0121, BCO26_RS00655, GI:754206531, WP_041818584.1	Bacillus_coagulans_2-6.RAST (77415/17/1)	gene	LSU ribosomal protein L23p (L23Ae)
BCO26_RS06010	BCO26_1166, BCO26_RS06010, GI:503625046, WP_013859122.1	Bacillus_coagulans_2-6.RAST (77415/17/1)	gene	Undecaprenyl diphosphate synthase (EC 2.5.1.31)
BCO26_RS06015	BCO26_1167, BCO26_RS06015, GI:503625047, WP_013859123.1	Bacillus_coagulans_2-6.RAST (77415/17/1)	gene	Phosphatidate cytidylyltransferase (EC 2.7.7.41)
BCO26_RS06020	BCO26_RS06020, GI:754207013, WP_041818971.1	Bacillus_coagulans_2-6.RAST (77415/17/1)	gene	1-deoxy-D-xylulose 5-phosphate reductoisomerase (EC 1.1.1.267)
BCO26_RS06025	BCO26_1169, BCO26_RS06025, GI:503625049, WP_013859125.1	Bacillus_coagulans_2-6.RAST (77415/17/1)	gene	Membrane-associated zinc metalloprotease
BCO26_RS06030	BCO26_1170, BCO26_RS06030, GI:503625050, WP_013859126.1	Bacillus_coagulans_2-6.RAST (77415/17/1)	gene	Prolyl-tRNA synthetase (EC 6.1.1.15), bacterial type
BCO26_RS06035	BCO26_1171, BCO26_RS06035, GI:503625051, WP_013859127.1, polC	Bacillus_coagulans_2-6.RAST (77415/17/1)	gene	DNA polymerase III polC-type (EC 2.7.7.7)
BCO26_RS06045	BCO26_1173, BCO26_RS06045, GI:503625052, WP_013859128.1	Bacillus_coagulans_2-6.RAST (77415/17/1)	gene	Bacterial ribosome SSU maturation protein RimP
BCO26_RS06050	BCO26_1174, BCO26_RS06050, GI:503625053, WP_013859129.1, nusA	Bacillus_coagulans_2-6.RAST (77415/17/1)	gene	Transcription termination protein NusA
BCO26_RS00660	BCO26_0122, BCO26_RS00660, GI:503624006, WP_013858082.1, rplB	Bacillus_coagulans_2-6.RAST (77415/17/1)	gene	LSU ribosomal protein L2p (L8e)
BCO26_RS06055	BCO26_1175, BCO26_RS06055, GI:503625054, WP_013859130.1	Bacillus_coagulans_2-6.RAST (77415/17/1)	gene	COG2740: Predicted nucleic-acid-binding protein implicated in transcription termination
BCO26_RS06060	BCO26_1176, BCO26_RS06060, GI:503625055, WP_013859131.1	Bacillus_coagulans_2-6.RAST (77415/17/1)	gene	ribosomal protein L7Ae family protein
BCO26_RS06070	BCO26_1179, BCO26_RS06070, GI:503625058, WP_013859134.1	Bacillus_coagulans_2-6.RAST (77415/17/1)	gene	YlxP-like protein
BCO26_RS06075	BCO26_1180, BCO26_RS06075, GI:503625059, WP_013859135.1	Bacillus_coagulans_2-6.RAST (77415/17/1)	gene	Ribosome-binding factor A
BCO26_RS06080	BCO26_1181, BCO26_RS06080, GI:503625060, WP_013859136.1, truB	Bacillus_coagulans_2-6.RAST (77415/17/1)	gene	tRNA pseudouridine(55) synthase (EC 5.4.99.25)
BCO26_RS06085	BCO26_1182, BCO26_RS06085, GI:754207019, WP_041818976.1	Bacillus_coagulans_2-6.RAST (77415/17/1)	gene	FMN adenylyltransferase (EC 2.7.7.2) / Riboflavin kinase (EC 2.7.1.26)
BCO26_RS06090	BCO26_1183, BCO26_RS06090, GI:503625062, WP_013859138.1	Bacillus_coagulans_2-6.RAST (77415/17/1)	gene	SSU ribosomal protein S15p (S13e)
BCO26_RS06095	BCO26_1184, BCO26_RS06095, GI:503625063, WP_013859139.1	Bacillus_coagulans_2-6.RAST (77415/17/1)	gene	Polyribonucleotide nucleotidyltransferase (EC 2.7.7.8)
BCO26_RS06100	BCO26_1185, BCO26_RS06100, GI:908639535, WP_049783556.1	Bacillus_coagulans_2-6.RAST (77415/17/1)	gene	FIG007013: polysaccharide deacetylase, putative
BCO26_RS00665	BCO26_0123, BCO26_RS00665, GI:503624007, WP_013858083.1	Bacillus_coagulans_2-6.RAST (77415/17/1)	gene	SSU ribosomal protein S19p (S15e)
BCO26_RS06105	BCO26_1186, BCO26_RS06105, GI:503625065, WP_013859141.1	Bacillus_coagulans_2-6.RAST (77415/17/1)	gene	FIG007959: peptidase, M16 family
BCO26_RS06110	BCO26_1187, BCO26_RS06110, GI:503625066, WP_013859142.1	Bacillus_coagulans_2-6.RAST (77415/17/1)	gene	FIG007697: hypothetical protein
BCO26_RS06115	BCO26_1188, BCO26_RS06115, GI:516123927, WP_017554507.1	Bacillus_coagulans_2-6.RAST (77415/17/1)	gene	Dipicolinate synthase subunit A
BCO26_RS06120	BCO26_1189, BCO26_RS06120, GI:503625068, WP_013859144.1, dpaB, spoVFB	Bacillus_coagulans_2-6.RAST (77415/17/1)	gene	Dipicolinate synthase subunit B
BCO26_RS06140	BCO26_1192, BCO26_RS06140, GI:503625071, WP_013859147.1	Bacillus_coagulans_2-6.RAST (77415/17/1)	gene	4-hydroxy-tetrahydrodipicolinate synthase (EC 4.3.3.7)
BCO26_RS06145	BCO26_1193, BCO26_RS06145, GI:503625072, WP_013859148.1	Bacillus_coagulans_2-6.RAST (77415/17/1)	gene	Ribonuclease J2 (endoribonuclease in RNA processing)
BCO26_RS06150	BCO26_1194, BCO26_RS06150, GI:503625073, WP_013859149.1	Bacillus_coagulans_2-6.RAST (77415/17/1)	gene	Translocation-enhancing protein TepA
BCO26_RS00670	BCO26_0124, BCO26_RS00670, GI:503624008, WP_013858084.1	Bacillus_coagulans_2-6.RAST (77415/17/1)	gene	LSU ribosomal protein L22p (L17e)
BCO26_RS06155	BCO26_1195, BCO26_RS06155, GI:503625074, WP_013859150.1	Bacillus_coagulans_2-6.RAST (77415/17/1)	gene	FIG01225515: hypothetical protein
BCO26_RS06160	BCO26_1196, BCO26_RS06160, GI:503625075, WP_013859151.1	Bacillus_coagulans_2-6.RAST (77415/17/1)	gene	DNA translocase FtsK
BCO26_RS06185	BCO26_1201, BCO26_RS06185, GI:503625080, WP_013859156.1	Bacillus_coagulans_2-6.RAST (77415/17/1)	gene	FIG001621: Zinc protease
BCO26_RS06190	BCO26_1202, BCO26_RS06190, GI:503625081, WP_013859157.1	Bacillus_coagulans_2-6.RAST (77415/17/1)	gene	Uncharacterized zinc protease YmfH
BCO26_RS06195	BCO26_1203, BCO26_RS06195, GI:503625082, WP_013859158.1, fabG	Bacillus_coagulans_2-6.RAST (77415/17/1)	gene	Oxidoreductase, short-chain dehydrogenase/reductase family
BCO26_RS06200	BCO26_1204, BCO26_RS06200, GI:503625083, WP_013859159.1	Bacillus_coagulans_2-6.RAST (77415/17/1)	gene	Uncharacterized protein YmfJ
BCO26_RS00675	BCO26_0125, BCO26_RS00675, GI:648412843, WP_026104594.1	Bacillus_coagulans_2-6.RAST (77415/17/1)	gene	SSU ribosomal protein S3p (S3e)
BCO26_RS06205	BCO26_1205, BCO26_RS06205, GI:516124034, WP_017554614.1	Bacillus_coagulans_2-6.RAST (77415/17/1)	gene	FIG00003568: ACT domain protein
BCO26_RS06210	BCO26_1206, BCO26_RS06210, GI:503625085, WP_013859161.1	Bacillus_coagulans_2-6.RAST (77415/17/1)	gene	Transcriptional regulator in cluster with unspecified monosaccharide ABC transport system
BCO26_RS06215	BCO26_1207, BCO26_RS06215, GI:518550914, WP_019721121.1	Bacillus_coagulans_2-6.RAST (77415/17/1)	gene	CDP-diacylglycerol--glycerol-3-phosphate 3-phosphatidyltransferase (EC 2.7.8.5)
BCO26_RS06220	BCO26_1208, BCO26_RS06220, GI:754207028, WP_041818983.1	Bacillus_coagulans_2-6.RAST (77415/17/1)	gene	ADP-ribose pyrophosphatase of COG1058 family (EC 3.6.1.13) / Nicotinamide-nucleotide amidase (EC 3.5.1.42)
BCO26_RS06225	BCO26_1210, BCO26_RS06225, GI:518550916, WP_019721123.1	Bacillus_coagulans_2-6.RAST (77415/17/1)	gene	RecA protein
BCO26_RS06230	BCO26_1212, BCO26_RS06230, GI:503625091, WP_013859167.1	Bacillus_coagulans_2-6.RAST (77415/17/1)	gene	Ribonuclease Y
BCO26_RS06235	BCO26_1213, BCO26_RS06235, GI:503625092, WP_013859168.1	Bacillus_coagulans_2-6.RAST (77415/17/1)	gene	2',3'-cyclic-nucleotide 2'-phosphodiesterase, Bsub YmdB
BCO26_RS06240	BCO26_1214, BCO26_RS06240, GI:503625093, WP_013859169.1	Bacillus_coagulans_2-6.RAST (77415/17/1)	gene	Spore core dehydratation and coat assembly protein SpoVS
BCO26_RS06245	BCO26_1215, BCO26_RS06245, GI:503625094, WP_013859170.1	Bacillus_coagulans_2-6.RAST (77415/17/1)	gene	peptidase, U32 family small subunit [C1]
BCO26_RS06250	BCO26_1216, BCO26_RS06250, GI:503625095, WP_013859171.1	Bacillus_coagulans_2-6.RAST (77415/17/1)	gene	Uncharacterized protease YrrO
BCO26_RS00680	BCO26_0126, BCO26_RS00680, GI:503624010, WP_013858086.1	Bacillus_coagulans_2-6.RAST (77415/17/1)	gene	LSU ribosomal protein L16p (L10e)
BCO26_RS06265	BCO26_1219, BCO26_RS06265, GI:503625098, WP_013859174.1	Bacillus_coagulans_2-6.RAST (77415/17/1)	gene	tRNA-i(6)A37 methylthiotransferase (EC 2.8.4.3)
BCO26_RS06270	BCO26_1220, BCO26_RS06270, GI:503625099, WP_013859175.1	Bacillus_coagulans_2-6.RAST (77415/17/1)	gene	YMCA protein
BCO26_RS06275	BCO26_1221, BCO26_RS06275, GI:503625100, WP_013859176.1	Bacillus_coagulans_2-6.RAST (77415/17/1)	gene	Outer spore coat protein CotE
BCO26_RS06280	BCO26_1222, BCO26_RS06280, GI:908639513, WP_049783534.1	Bacillus_coagulans_2-6.RAST (77415/17/1)	gene	DNA mismatch repair protein MutS
BCO26_RS06285	BCO26_1223, BCO26_RS06285, GI:503625102, WP_013859178.1	Bacillus_coagulans_2-6.RAST (77415/17/1)	gene	DNA mismatch repair protein MutL
BCO26_RS06290	BCO26_1224, BCO26_RS06290, GI:503625103, WP_013859179.1	Bacillus_coagulans_2-6.RAST (77415/17/1)	gene	cation-transporting ATPase, E1-E2 family
BCO26_RS06295	BCO26_1225, BCO26_RS06295, GI:503625104, WP_013859180.1	Bacillus_coagulans_2-6.RAST (77415/17/1)	gene	hypothetical protein
BCO26_RS06305	BCO26_1227, BCO26_RS06305, GI:648413029, WP_026104780.1	Bacillus_coagulans_2-6.RAST (77415/17/1)	gene	tRNA dimethylallyltransferase (EC 2.5.1.75)
BCO26_RS00685	BCO26_0127, BCO26_RS00685, GI:503624011, WP_013858087.1	Bacillus_coagulans_2-6.RAST (77415/17/1)	gene	LSU ribosomal protein L29p (L35e)
BCO26_RS06310	BCO26_1228, BCO26_RS06310, GI:503625107, WP_013859183.1	Bacillus_coagulans_2-6.RAST (77415/17/1)	gene	RNA-binding protein Hfq
BCO26_RS06315	BCO26_1229, BCO26_RS06315, GI:503625108, WP_013859184.1	Bacillus_coagulans_2-6.RAST (77415/17/1)	gene	Stage V sporulation protein SpoVK
BCO26_RS06325	BCO26_1231, BCO26_RS06325, GI:503625110, WP_013859186.1	Bacillus_coagulans_2-6.RAST (77415/17/1)	gene	Aluminum resistance protein
BCO26_RS06330	BCO26_1232, BCO26_RS06330, GI:503625111, WP_013859187.1	Bacillus_coagulans_2-6.RAST (77415/17/1)	gene	DNA polymerase I 5'-3' exonuclease domain
BCO26_RS06340	BCO26_1234, BCO26_RS06340, GI:516124091, WP_017554671.1	Bacillus_coagulans_2-6.RAST (77415/17/1)	gene	hypothetical protein
BCO26_RS06345	BCO26_1235, BCO26_RS06345, GI:503625114, WP_013859190.1	Bacillus_coagulans_2-6.RAST (77415/17/1)	gene	Cold shock protein of CSP family
BCO26_RS06350	BCO26_1236, BCO26_RS06350, GI:754207032, WP_041818986.1	Bacillus_coagulans_2-6.RAST (77415/17/1)	gene	Mn-dependent transcriptional regulator MntR
BCO26_RS06355	BCO26_1238, BCO26_RS06355, GI:503625117, WP_013859193.1	Bacillus_coagulans_2-6.RAST (77415/17/1)	gene	Formate--tetrahydrofolate ligase (EC 6.3.4.3)
BCO26_RS00095	BCO26_0015, BCO26_RS00095, GI:503623903, WP_013857979.1	Bacillus_coagulans_2-6.RAST (77415/17/1)	gene	DUF327 domain-containing protein
BCO26_RS00690	BCO26_0128, BCO26_RS00690, GI:503624012, WP_013858088.1	Bacillus_coagulans_2-6.RAST (77415/17/1)	gene	SSU ribosomal protein S17p (S11e)
BCO26_RS06360	BCO26_1239, BCO26_RS06360, GI:503625118, WP_013859194.1	Bacillus_coagulans_2-6.RAST (77415/17/1)	gene	Bacillus cereus group-specific protein, uncharacterized
BCO26_RS06365	BCO26_1240, BCO26_RS06365, GI:503625119, WP_013859195.1	Bacillus_coagulans_2-6.RAST (77415/17/1)	gene	Bis-ABC ATPase Uup
BCO26_RS06370	BCO26_1242, BCO26_RS06370, GI:503625121, WP_013859197.1	Bacillus_coagulans_2-6.RAST (77415/17/1)	gene	PBS lyase HEAT-like repeat domain protein
BCO26_RS06375	BCO26_1243, BCO26_RS06375, GI:503625122, WP_013859198.1	Bacillus_coagulans_2-6.RAST (77415/17/1)	gene	FIG01226173: hypothetical protein
BCO26_RS06380	BCO26_RS06380, GI:754207035, WP_041818989.1	Bacillus_coagulans_2-6.RAST (77415/17/1)	gene	FIG01231694: hypothetical protein
BCO26_RS06385	BCO26_1245, BCO26_RS06385, GI:754207038, WP_041818991.1	Bacillus_coagulans_2-6.RAST (77415/17/1)	gene	Thymidylate synthase (EC 2.1.1.45)
BCO26_RS06390	BCO26_1246, BCO26_RS06390, GI:503625125, WP_013859201.1	Bacillus_coagulans_2-6.RAST (77415/17/1)	gene	Dihydrofolate reductase (EC 1.5.1.3)
BCO26_RS06395	BCO26_1247, BCO26_RS06395, GI:503625126, WP_013859202.1	Bacillus_coagulans_2-6.RAST (77415/17/1)	gene	FIG01964566: Predicted membrane protein, hemolysin III homolog
BCO26_RS06400	BCO26_1248, BCO26_RS06400, GI:754207041, WP_041818994.1	Bacillus_coagulans_2-6.RAST (77415/17/1)	gene	FIG006988: Lipase/Acylhydrolase with GDSL-like motif
BCO26_RS06405	BCO26_1249, BCO26_RS06405, GI:754207044, WP_041818996.1	Bacillus_coagulans_2-6.RAST (77415/17/1)	gene	YfaA
BCO26_RS00695	BCO26_0129, BCO26_RS00695, GI:503624013, WP_013858089.1	Bacillus_coagulans_2-6.RAST (77415/17/1)	gene	LSU ribosomal protein L14p (L23e)
BCO26_RS06410	BCO26_1250, BCO26_RS06410, GI:503625129, WP_013859205.1	Bacillus_coagulans_2-6.RAST (77415/17/1)	gene	tRNA/rRNA cytosine-C5-methyltransferase
BCO26_RS06415	1.8.4.11, BCO26_RS06415, GI:754207046, WP_041818998.1	Bacillus_coagulans_2-6.RAST (77415/17/1)	gene	Peptide-methionine (S)-S-oxide reductase MsrA (EC 1.8.4.11)
BCO26_RS06420	BCO26_1251, BCO26_RS06420, GI:503625130, WP_013859206.1	Bacillus_coagulans_2-6.RAST (77415/17/1)	gene	Peptide-methionine (R)-S-oxide reductase MsrB (EC 1.8.4.12)
BCO26_RS06430	BCO26_1253, BCO26_RS06430, GI:754207047, WP_041818999.1	Bacillus_coagulans_2-6.RAST (77415/17/1)	gene	hypothetical protein
BCO26_RS06440	BCO26_1254, BCO26_RS06440, GI:503625133, WP_013859209.1	Bacillus_coagulans_2-6.RAST (77415/17/1)	gene	IG hypothetical 18022
BCO26_RS06445	BCO26_1255, BCO26_RS06445, GI:503625134, WP_013859210.1	Bacillus_coagulans_2-6.RAST (77415/17/1)	gene	hypothetical protein
BCO26_RS06455	BCO26_1257, BCO26_RS06455, GI:503625136, WP_013859212.1	Bacillus_coagulans_2-6.RAST (77415/17/1)	gene	D-alanyl-D-alanine carboxypeptidase (EC 3.4.16.4)
BCO26_RS06460	BCO26_1258, BCO26_RS06460, GI:503625137, WP_013859213.1	Bacillus_coagulans_2-6.RAST (77415/17/1)	gene	Carboxyl-terminal protease (EC 3.4.21.102)
BCO26_RS00700	BCO26_0130, BCO26_RS00700, GI:503624014, WP_013858090.1	Bacillus_coagulans_2-6.RAST (77415/17/1)	gene	LSU ribosomal protein L24p (L26e)
BCO26_RS06465	BCO26_RS06465, GI:754207053, WP_041819004.1	Bacillus_coagulans_2-6.RAST (77415/17/1)	gene	hypothetical DNA-binding protein
BCO26_RS06475	BCO26_1260, BCO26_RS06475, GI:503625139, WP_013859215.1	Bacillus_coagulans_2-6.RAST (77415/17/1)	gene	Uncharacterized protein YkwD
BCO26_RS06480	BCO26_1261, BCO26_RS06480, GI:503625140, WP_013859216.1	Bacillus_coagulans_2-6.RAST (77415/17/1)	gene	Multi antimicrobial extrusion protein (Na(+)/drug antiporter), MATE family of MDR efflux pumps
BCO26_RS06485	BCO26_1262, BCO26_RS06485, GI:754207058, WP_041819008.1	Bacillus_coagulans_2-6.RAST (77415/17/1)	gene	hypothetical protein
BCO26_RS06490	BCO26_RS06490, GI:754207062, WP_041819011.1	Bacillus_coagulans_2-6.RAST (77415/17/1)	gene	Diaminopimelate epimerase (EC 5.1.1.7)
BCO26_RS06495	BCO26_1265, BCO26_RS06495, GI:503625144, WP_013859220.1	Bacillus_coagulans_2-6.RAST (77415/17/1)	gene	ATP-dependent DNA ligase (EC 6.5.1.1) clustered with Ku protein, LigD
BCO26_RS06500	BCO26_1266, BCO26_RS06500, GI:754207063, WP_041819012.1	Bacillus_coagulans_2-6.RAST (77415/17/1)	gene	Ku domain protein
BCO26_RS06510	BCO26_1269, BCO26_RS06510, GI:503625148, WP_013859224.1	Bacillus_coagulans_2-6.RAST (77415/17/1)	gene	Lipoteichoic acid synthase LtaS Type Ia
BCO26_RS06515	BCO26_1270, BCO26_RS06515, GI:754207069, WP_041819017.1	Bacillus_coagulans_2-6.RAST (77415/17/1)	gene	Uncharacterized protein YyaL
BCO26_RS00705	BCO26_0131, BCO26_RS00705, GI:503624015, WP_013858091.1	Bacillus_coagulans_2-6.RAST (77415/17/1)	gene	LSU ribosomal protein L5p (L11e)
BCO26_RS06520	BCO26_1271, BCO26_RS06520, GI:754207071, WP_041819019.1	Bacillus_coagulans_2-6.RAST (77415/17/1)	gene	Siderophore transport protein
BCO26_RS06525	BCO26_1272, BCO26_RS06525, GI:648413090, WP_026104841.1	Bacillus_coagulans_2-6.RAST (77415/17/1)	gene	Phosphate regulon transcriptional regulatory protein PhoB (SphR)
BCO26_RS06535	BCO26_RS06535, GI:754207076, WP_041819023.1	Bacillus_coagulans_2-6.RAST (77415/17/1)	gene	hypothetical protein
BCO26_RS06550	BCO26_1276, BCO26_RS06550, GI:503625155, WP_013859231.1	Bacillus_coagulans_2-6.RAST (77415/17/1)	gene	Dihydrolipoamide succinyltransferase component (E2) of 2-oxoglutarate dehydrogenase complex (EC 2.3.1.61)
BCO26_RS06555	BCO26_1277, BCO26_RS06555, GI:503625156, WP_013859232.1	Bacillus_coagulans_2-6.RAST (77415/17/1)	gene	Aldehyde dehydrogenase (EC 1.2.1.3)
BCO26_RS06560	BCO26_1278, BCO26_RS06560, GI:656145022, WP_029141633.1	Bacillus_coagulans_2-6.RAST (77415/17/1)	gene	hypothetical protein
BCO26_RS06565	BCO26_1279, BCO26_RS06565, GI:503625158, WP_013859234.1	Bacillus_coagulans_2-6.RAST (77415/17/1)	gene	Inner membrane protein translocase and chaperone YidC, OxaA protein
BCO26_RS00710	BCO26_RS00710, GI:503862500, WP_014096494.1, rpsN	Bacillus_coagulans_2-6.RAST (77415/17/1)	gene	SSU ribosomal protein S14p (S29e) @ SSU ribosomal protein S14p (S29e), zinc-dependent
BCO26_RS06570	BCO26_RS06570, GI:516123499, WP_017554079.1	Bacillus_coagulans_2-6.RAST (77415/17/1)	gene	hypothetical protein
BCO26_RS06580	BCO26_1281, BCO26_RS06580, GI:503625160, WP_013859236.1	Bacillus_coagulans_2-6.RAST (77415/17/1)	gene	DNA topoisomerase III (EC 5.99.1.2)
BCO26_RS06585	BCO26_1282, BCO26_RS06585, GI:503625161, WP_013859237.1	Bacillus_coagulans_2-6.RAST (77415/17/1)	gene	Rhodanese domain protein UPF0176, Firmicutes subgroup
BCO26_RS06590	BCO26_1283, BCO26_RS06590, GI:503625162, WP_013859238.1	Bacillus_coagulans_2-6.RAST (77415/17/1)	gene	protein of unknown function DUF159
BCO26_RS06595	BCO26_1284, BCO26_RS06595, GI:503625163, WP_013859239.1	Bacillus_coagulans_2-6.RAST (77415/17/1)	gene	Substrate-specific component ThiT of thiamin ECF transporter
BCO26_RS06605	BCO26_1286, BCO26_RS06605, GI:503625165, WP_013859241.1	Bacillus_coagulans_2-6.RAST (77415/17/1)	gene	hypothetical protein
BCO26_RS06615	BCO26_1289, BCO26_RS06615, GI:503625168, WP_013859244.1	Bacillus_coagulans_2-6.RAST (77415/17/1)	gene	Cell wall-binding protein
BCO26_RS06620	BCO26_1290, BCO26_RS06620, GI:503625169, WP_013859245.1	Bacillus_coagulans_2-6.RAST (77415/17/1)	gene	DNA topoisomerase III (EC 5.99.1.2)
BCO26_RS00715	BCO26_0132, BCO26_RS00715, GI:503624016, WP_013858092.1	Bacillus_coagulans_2-6.RAST (77415/17/1)	gene	SSU ribosomal protein S8p (S15Ae)
BCO26_RS06625	BCO26_1291, BCO26_RS06625, GI:503625170, WP_013859246.1	Bacillus_coagulans_2-6.RAST (77415/17/1)	gene	Uncharacterized transporter YcgH
BCO26_RS06630	BCO26_1292, BCO26_RS06630, GI:503625171, WP_013859247.1	Bacillus_coagulans_2-6.RAST (77415/17/1)	gene	Magnesium and cobalt transport protein CorA
BCO26_RS06635	BCO26_RS06635, GI:754207081, WP_041819027.1	Bacillus_coagulans_2-6.RAST (77415/17/1)	gene	FIG01108317: hypothetical protein
BCO26_RS06640	BCO26_1294, BCO26_RS06640, GI:503625173, WP_013859249.1	Bacillus_coagulans_2-6.RAST (77415/17/1)	gene	hypothetical protein
BCO26_RS06645	BCO26_1295, BCO26_RS06645, GI:503625174, WP_013859250.1	Bacillus_coagulans_2-6.RAST (77415/17/1)	gene	ATP phosphoribosyltransferase (EC 2.4.2.17) => HisGs
BCO26_RS06650	BCO26_1296, BCO26_RS06650, GI:503625175, WP_013859251.1	Bacillus_coagulans_2-6.RAST (77415/17/1)	gene	Histidinol dehydrogenase (EC 1.1.1.23)
BCO26_RS06655	BCO26_1297, BCO26_RS06655, GI:503625176, WP_013859252.1, hisB	Bacillus_coagulans_2-6.RAST (77415/17/1)	gene	Imidazoleglycerol-phosphate dehydratase (EC 4.2.1.19)
BCO26_RS06660	BCO26_1298, BCO26_RS06660, GI:503625177, WP_013859253.1, hisH	Bacillus_coagulans_2-6.RAST (77415/17/1)	gene	Imidazole glycerol phosphate synthase amidotransferase subunit HisH
BCO26_RS06665	BCO26_1299, BCO26_RS06665, GI:503625178, WP_013859254.1	Bacillus_coagulans_2-6.RAST (77415/17/1)	gene	Phosphoribosylformimino-5-aminoimidazole carboxamide ribotide isomerase (EC 5.3.1.16)
BCO26_RS06670	BCO26_1300, BCO26_RS06670, GI:503625179, WP_013859255.1	Bacillus_coagulans_2-6.RAST (77415/17/1)	gene	Imidazole glycerol phosphate synthase cyclase subunit
BCO26_RS00720	BCO26_RS00720, GI:754206533, WP_041818586.1	Bacillus_coagulans_2-6.RAST (77415/17/1)	gene	LSU ribosomal protein L6p (L9e)
BCO26_RS06675	BCO26_1301, BCO26_RS06675, GI:516122654, WP_017553234.1	Bacillus_coagulans_2-6.RAST (77415/17/1)	gene	Phosphoribosyl-AMP cyclohydrolase (EC 3.5.4.19) / Phosphoribosyl-ATP pyrophosphatase (EC 3.6.1.31)
BCO26_RS06680	BCO26_1302, BCO26_RS06680, GI:503625181, WP_013859257.1	Bacillus_coagulans_2-6.RAST (77415/17/1)	gene	hypothetical protein
BCO26_RS06685	BCO26_1303, BCO26_RS06685, GI:503625182, WP_013859258.1	Bacillus_coagulans_2-6.RAST (77415/17/1)	gene	UPF0394 inner membrane protein YedE
BCO26_RS06705	BCO26_1308, BCO26_RS06705, GI:503625187, WP_013859263.1	Bacillus_coagulans_2-6.RAST (77415/17/1)	gene	hypothetical protein
BCO26_RS06710	BCO26_1309, BCO26_RS06710, GI:503625188, WP_013859264.1	Bacillus_coagulans_2-6.RAST (77415/17/1)	gene	hypothetical protein
BCO26_RS06715	BCO26_1310, BCO26_RS06715, GI:754207083, WP_041819029.1	Bacillus_coagulans_2-6.RAST (77415/17/1)	gene	hypothetical protein
BCO26_RS00725	BCO26_0134, BCO26_RS00725, GI:503624018, WP_013858094.1	Bacillus_coagulans_2-6.RAST (77415/17/1)	gene	LSU ribosomal protein L18p (L5e)
BCO26_RS06730	BCO26_1313, BCO26_RS06730, GI:503864401, WP_014098395.1	Bacillus_coagulans_2-6.RAST (77415/17/1)	gene	hypothetical protein
BCO26_RS06740	BCO26_1316, BCO26_RS06740, GI:503625195, WP_013859271.1	Bacillus_coagulans_2-6.RAST (77415/17/1)	gene	hypothetical protein
BCO26_RS06745	BCO26_1317, BCO26_RS06745, GI:503625196, WP_013859272.1	Bacillus_coagulans_2-6.RAST (77415/17/1)	gene	Cold shock protein of CSP family
BCO26_RS06755	BCO26_1319, BCO26_RS06755, GI:503625198, WP_013859274.1	Bacillus_coagulans_2-6.RAST (77415/17/1)	gene	GTP cyclohydrolase I (EC 3.5.4.16) type 1
BCO26_RS06760	BCO26_1320, BCO26_RS06760, GI:503625199, WP_013859275.1	Bacillus_coagulans_2-6.RAST (77415/17/1)	gene	Thioredoxin reductase (EC 1.8.1.9)
BCO26_RS06765	BCO26_1321, BCO26_RS06765, GI:503625200, WP_013859276.1	Bacillus_coagulans_2-6.RAST (77415/17/1)	gene	hypothetical protein
BCO26_RS06770	BCO26_1322, BCO26_RS06770, GI:503625201, WP_013859277.1	Bacillus_coagulans_2-6.RAST (77415/17/1)	gene	Uncharacterized protein YxiS
BCO26_RS00730	BCO26_0135, BCO26_RS00730, GI:503624019, WP_013858095.1	Bacillus_coagulans_2-6.RAST (77415/17/1)	gene	SSU ribosomal protein S5p (S2e)
BCO26_RS06775	BCO26_1323, BCO26_RS06775, GI:503625202, WP_013859278.1	Bacillus_coagulans_2-6.RAST (77415/17/1)	gene	Bacitracin export permease protein BceB
BCO26_RS06780	BCO26_1324, BCO26_RS06780, GI:503625203, WP_013859279.1	Bacillus_coagulans_2-6.RAST (77415/17/1)	gene	Bacitracin export ATP-binding protein BceA
BCO26_RS06785	BCO26_1325, BCO26_RS06785, GI:503625204, WP_013859280.1	Bacillus_coagulans_2-6.RAST (77415/17/1)	gene	Two-component sensor histidine kinase BceS
BCO26_RS06790	BCO26_1326, BCO26_RS06790, GI:503625205, WP_013859281.1	Bacillus_coagulans_2-6.RAST (77415/17/1)	gene	Two-component response regulator BceR
BCO26_RS00735	BCO26_0136, BCO26_RS00735, GI:503624020, WP_013858096.1	Bacillus_coagulans_2-6.RAST (77415/17/1)	gene	LSU ribosomal protein L30p (L7e)
BCO26_RS06845	BCO26_RS06845, GI:754207097, WP_041819041.1	Bacillus_coagulans_2-6.RAST (77415/17/1)	gene	Uncharacterized MFS-type transporter
BCO26_RS06865	BCO26_1341, BCO26_RS06865, GI:503625220, WP_013859296.1	Bacillus_coagulans_2-6.RAST (77415/17/1)	gene	hypothetical protein
BCO26_RS06870	BCO26_1342, BCO26_RS06870, GI:754207823, WP_041819658.1	Bacillus_coagulans_2-6.RAST (77415/17/1)	gene	Holin-like protein CidA
BCO26_RS06875	BCO26_RS06875, GI:754207100, WP_041819043.1	Bacillus_coagulans_2-6.RAST (77415/17/1)	gene	LrgA-associated membrane protein LrgB
BCO26_RS06880	BCO26_1344, BCO26_RS06880, GI:503625223, WP_013859299.1	Bacillus_coagulans_2-6.RAST (77415/17/1)	gene	Long-chain-fatty-acid--CoA ligase (EC 6.2.1.3)
BCO26_RS06885	BCO26_RS06885, GI:754207102, WP_041819045.1	Bacillus_coagulans_2-6.RAST (77415/17/1)	gene	Membrane proteins related to metalloendopeptidases
BCO26_RS00100	BCO26_0016, BCO26_RS00100, GI:503623904, WP_013857980.1	Bacillus_coagulans_2-6.RAST (77415/17/1)	gene	DNA polymerase III delta prime subunit (EC 2.7.7.7)
BCO26_RS00740	BCO26_0137, BCO26_RS00740, GI:503624021, WP_013858097.1	Bacillus_coagulans_2-6.RAST (77415/17/1)	gene	LSU ribosomal protein L15p (L27Ae)
BCO26_RS06890	BCO26_1346, BCO26_RS06890, GI:503625225, WP_013859301.1	Bacillus_coagulans_2-6.RAST (77415/17/1)	gene	hypothetical protein
BCO26_RS06895	BCO26_1348, BCO26_RS06895, GI:503625227, WP_013859303.1	Bacillus_coagulans_2-6.RAST (77415/17/1)	gene	FIG01227048: hypothetical protein
BCO26_RS06910	BCO26_1350, BCO26_RS06910, GI:503625229, WP_013859305.1	Bacillus_coagulans_2-6.RAST (77415/17/1)	gene	Aminopeptidase S (Leu, Val, Phe, Tyr preference) (EC 3.4.11.24)
BCO26_RS06920	BCO26_1352, BCO26_RS06920, GI:503625231, WP_013859307.1	Bacillus_coagulans_2-6.RAST (77415/17/1)	gene	Aconitate hydratase (EC 4.2.1.3)
BCO26_RS06930	BCO26_1355, BCO26_RS06930, GI:503625234, WP_013859310.1	Bacillus_coagulans_2-6.RAST (77415/17/1)	gene	Small, acid-soluble spore protein Tlp
BCO26_RS06935	BCO26_1356, BCO26_RS06935, GI:503625235, WP_013859311.1	Bacillus_coagulans_2-6.RAST (77415/17/1)	gene	4-hydroxybenzoyl-CoA thioesterase family active site
BCO26_RS00745	BCO26_0138, BCO26_RS00745, GI:503624022, WP_013858098.1	Bacillus_coagulans_2-6.RAST (77415/17/1)	gene	Protein translocase subunit SecY
BCO26_RS06940	BCO26_1357, BCO26_RS06940, GI:503625236, WP_013859312.1	Bacillus_coagulans_2-6.RAST (77415/17/1)	gene	FIG01227614: hypothetical protein
BCO26_RS06945	BCO26_1358, BCO26_RS06945, GI:503625237, WP_013859313.1	Bacillus_coagulans_2-6.RAST (77415/17/1)	gene	FIG01226527: hypothetical protein
BCO26_RS06950	BCO26_1359, BCO26_RS06950, GI:503625238, WP_013859314.1	Bacillus_coagulans_2-6.RAST (77415/17/1)	gene	Acyl-phosphate:glycerol-3-phosphate O-acyltransferase PlsY (EC 2.3.1.n3)
BCO26_RS06955	BCO26_1360, BCO26_RS06955, GI:503625239, WP_013859315.1	Bacillus_coagulans_2-6.RAST (77415/17/1)	gene	Uncharacterized CoA-binding protein YneT
BCO26_RS06960	BCO26_1361, BCO26_RS06960, GI:648412943, WP_026104694.1, gyrB	Bacillus_coagulans_2-6.RAST (77415/17/1)	gene	DNA topoisomerase IV subunit B (EC 5.99.1.3)
BCO26_RS06965	BCO26_1362, BCO26_RS06965, GI:503625241, WP_013859317.1	Bacillus_coagulans_2-6.RAST (77415/17/1)	gene	DNA topoisomerase IV subunit A (EC 5.99.1.3)
BCO26_RS06970	BCO26_1363, BCO26_RS06970, GI:754207105, WP_041819047.1	Bacillus_coagulans_2-6.RAST (77415/17/1)	gene	hypothetical protein
BCO26_RS06980	BCO26_1365, BCO26_RS06980, GI:503625244, WP_013859320.1	Bacillus_coagulans_2-6.RAST (77415/17/1)	gene	Phosphoenolpyruvate synthase regulatory protein
BCO26_RS00750	BCO26_0139, BCO26_RS00750, GI:503624023, WP_013858099.1	Bacillus_coagulans_2-6.RAST (77415/17/1)	gene	Adenylate kinase (EC 2.7.4.3)
BCO26_RS07005	BCO26_1371, BCO26_RS07005, GI:503625250, WP_013859326.1	Bacillus_coagulans_2-6.RAST (77415/17/1)	gene	Putative oxidoreductase YrpB, nitronate monooxygenase family
BCO26_RS07010	BCO26_RS07010, GI:656144106, WP_029141321.1	Bacillus_coagulans_2-6.RAST (77415/17/1)	gene	Signal peptidase I (EC 3.4.21.89)
BCO26_RS00755	BCO26_0141, BCO26_RS00755, GI:503624025, WP_013858101.1, infA	Bacillus_coagulans_2-6.RAST (77415/17/1)	gene	Translation initiation factor 1
BCO26_RS00765	BCO26_0142, BCO26_RS00765, GI:503624026, WP_013858102.1	Bacillus_coagulans_2-6.RAST (77415/17/1)	gene	SSU ribosomal protein S13p (S18e)
BCO26_RS07185	BCO26_1400, BCO26_RS07185, GI:503625276, WP_013859352.1	Bacillus_coagulans_2-6.RAST (77415/17/1)	gene	Sulfite reductase [NADPH] flavoprotein alpha-component (EC 1.8.1.2)
BCO26_RS07190	BCO26_1401, BCO26_RS07190, GI:503625277, WP_013859353.1	Bacillus_coagulans_2-6.RAST (77415/17/1)	gene	Sulfite reductase [NADPH] hemoprotein beta-component (EC 1.8.1.2)
BCO26_RS07195	BCO26_1402, BCO26_RS07195, GI:503625278, WP_013859354.1	Bacillus_coagulans_2-6.RAST (77415/17/1)	gene	hypothetical protein
BCO26_RS07205	BCO26_1404, BCO26_RS07205, GI:503625280, WP_013859356.1	Bacillus_coagulans_2-6.RAST (77415/17/1)	gene	Acetylornithine deacetylase/Succinyl-diaminopimelate desuccinylase and related deacylases
BCO26_RS07215	BCO26_1406, BCO26_RS07215, GI:503625282, WP_013859358.1	Bacillus_coagulans_2-6.RAST (77415/17/1)	gene	Acetoin dehydrogenase E1 component alpha-subunit (EC 2.3.1.190)
BCO26_RS00770	BCO26_0143, BCO26_RS00770, GI:503624027, WP_013858103.1	Bacillus_coagulans_2-6.RAST (77415/17/1)	gene	SSU ribosomal protein S11p (S14e)
BCO26_RS07225	BCO26_1408, BCO26_RS07225, GI:503625284, WP_013859360.1	Bacillus_coagulans_2-6.RAST (77415/17/1)	gene	Dihydrolipoamide acetyltransferase component (E2) of acetoin dehydrogenase complex (EC 2.3.1.12)
BCO26_RS07230	BCO26_1409, BCO26_RS07230, GI:503625285, WP_013859361.1, acoL	Bacillus_coagulans_2-6.RAST (77415/17/1)	gene	Dihydrolipoamide dehydrogenase of acetoin dehydrogenase (EC 1.8.1.4)
BCO26_RS07240	BCO26_RS07240, GI:754207120, WP_041819060.1	Bacillus_coagulans_2-6.RAST (77415/17/1)	gene	hypothetical protein
BCO26_RS07245	BCO26_1412, BCO26_RS07245, GI:503625288, WP_013859364.1	Bacillus_coagulans_2-6.RAST (77415/17/1)	gene	MBL-fold metallo-hydrolase superfamily
BCO26_RS07255	BCO26_1414, BCO26_RS07255, GI:656147721, WP_029142635.1	Bacillus_coagulans_2-6.RAST (77415/17/1)	gene	O-acetyl-ADP-ribose deacetylase
BCO26_RS07260	BCO26_1415, BCO26_RS07260, GI:503625291, WP_013859367.1, sspH	Bacillus_coagulans_2-6.RAST (77415/17/1)	gene	hypothetical protein
BCO26_RS07265	BCO26_1416, BCO26_RS07265, GI:503625292, WP_013859368.1	Bacillus_coagulans_2-6.RAST (77415/17/1)	gene	3-oxoacyl-[acyl-carrier protein] reductase (EC 1.1.1.100)
BCO26_RS00775	BCO26_0144, BCO26_RS00775, GI:516123434, WP_017554014.1	Bacillus_coagulans_2-6.RAST (77415/17/1)	gene	DNA-directed RNA polymerase alpha subunit (EC 2.7.7.6)
BCO26_RS07280	BCO26_1419, BCO26_RS07280, GI:516119811, WP_017550391.1	Bacillus_coagulans_2-6.RAST (77415/17/1)	gene	Replication termination protein
BCO26_RS07285	BCO26_RS07285, GI:754207122, WP_041819061.1	Bacillus_coagulans_2-6.RAST (77415/17/1)	gene	Hydrolase
BCO26_RS07290	BCO26_RS07290, GI:648412755, WP_026104506.1	Bacillus_coagulans_2-6.RAST (77415/17/1)	gene	Terminal oxidase biogenesis protein CtaM, putative heme A, heme O chaperone
BCO26_RS07295	BCO26_1422, BCO26_RS07295, GI:503625298, WP_013859374.1	Bacillus_coagulans_2-6.RAST (77415/17/1)	gene	hypothetical protein
BCO26_RS07300	BCO26_1423, BCO26_RS07300, GI:503625299, WP_013859375.1	Bacillus_coagulans_2-6.RAST (77415/17/1)	gene	hypothetical protein
BCO26_RS07305	BCO26_1424, BCO26_RS07305, GI:503625300, WP_013859376.1	Bacillus_coagulans_2-6.RAST (77415/17/1)	gene	L-lactate dehydrogenase (EC 1.1.1.27)
BCO26_RS00780	BCO26_0145, BCO26_RS00780, GI:503624029, WP_013858105.1	Bacillus_coagulans_2-6.RAST (77415/17/1)	gene	LSU ribosomal protein L17p
BCO26_RS07335	BCO26_1427, BCO26_RS07335, GI:503625303, WP_013859379.1	Bacillus_coagulans_2-6.RAST (77415/17/1)	gene	Fosmidomycin resistance protein
BCO26_RS07340	BCO26_RS07340, GI:754207130, WP_041819068.1	Bacillus_coagulans_2-6.RAST (77415/17/1)	gene	Spore cortex-lytic enzyme CwlJ
BCO26_RS07355	BCO26_1430, BCO26_RS07355, GI:503625306, WP_013859382.1	Bacillus_coagulans_2-6.RAST (77415/17/1)	gene	Glycogen synthase, ADP-glucose transglucosylase (EC 2.4.1.21)
BCO26_RS07360	BCO26_1431, BCO26_RS07360, GI:503625307, WP_013859383.1	Bacillus_coagulans_2-6.RAST (77415/17/1)	gene	Glycogen biosynthesis protein GlgD, glucose-1-phosphate adenylyltransferase family
BCO26_RS07365	BCO26_1432, BCO26_RS07365, GI:503625308, WP_013859384.1, glgC	Bacillus_coagulans_2-6.RAST (77415/17/1)	gene	Glucose-1-phosphate adenylyltransferase (EC 2.7.7.27)
BCO26_RS00785	BCO26_RS00785, GI:503624030, WP_013858106.1, cbiO	Bacillus_coagulans_2-6.RAST (77415/17/1)	gene	ATPase component of general energizing module of ECF transporters
BCO26_RS07385	BCO26_RS07385, GI:754207135, WP_041819072.1	Bacillus_coagulans_2-6.RAST (77415/17/1)	gene	2-hydroxychromene-2-carboxylate isomerase/DsbA-like thioredoxin domain
BCO26_RS07390	BCO26_RS07390, GI:754207825, WP_041819660.1	Bacillus_coagulans_2-6.RAST (77415/17/1)	gene	Acetyltransferase, GNAT family
BCO26_RS07395	BCO26_RS07395, GI:754207138, WP_041819074.1	Bacillus_coagulans_2-6.RAST (77415/17/1)	gene	Uncharacterized Nudix hydrolase NudL
BCO26_RS07400	BCO26_1438, BCO26_RS07400, GI:503625314, WP_013859390.1	Bacillus_coagulans_2-6.RAST (77415/17/1)	gene	Manganese transport protein MntH
BCO26_RS07410	BCO26_1440, BCO26_RS07410, GI:503625316, WP_013859392.1	Bacillus_coagulans_2-6.RAST (77415/17/1)	gene	hypothetical protein
BCO26_RS07415	BCO26_1441, BCO26_RS07415, GI:503625317, WP_013859393.1	Bacillus_coagulans_2-6.RAST (77415/17/1)	gene	hypothetical protein
BCO26_RS07420	BCO26_1442, BCO26_RS07420, GI:503625318, WP_013859394.1	Bacillus_coagulans_2-6.RAST (77415/17/1)	gene	Efflux ABC transporter, ATP-binding protein
BCO26_RS00105	BCO26_0017, BCO26_RS00105, GI:503623905, WP_013857981.1	Bacillus_coagulans_2-6.RAST (77415/17/1)	gene	Stage 0 sporulation protein YaaT
BCO26_RS00790	BCO26_0147, BCO26_RS00790, GI:503624031, WP_013858107.1, cbiO	Bacillus_coagulans_2-6.RAST (77415/17/1)	gene	ATPase component of general energizing module of ECF transporters
BCO26_RS07430	BCO26_1444, BCO26_RS07430, GI:503625320, WP_013859396.1, murB	Bacillus_coagulans_2-6.RAST (77415/17/1)	gene	UDP-N-acetylenolpyruvoylglucosamine reductase (EC 1.3.1.98)
BCO26_RS07435	BCO26_RS07435, GI:754207141, WP_041819077.1	Bacillus_coagulans_2-6.RAST (77415/17/1)	gene	hypothetical protein
BCO26_RS07440	BCO26_1446, BCO26_RS07440, GI:503625322, WP_013859398.1	Bacillus_coagulans_2-6.RAST (77415/17/1)	gene	hypothetical protein
BCO26_RS07445	BCO26_1447, BCO26_RS07445, GI:503625323, WP_013859399.1	Bacillus_coagulans_2-6.RAST (77415/17/1)	gene	6-phosphogluconate dehydrogenase, decarboxylating (EC 1.1.1.44)
BCO26_RS07470	BCO26_RS07470, GI:754207143, WP_041819079.1	Bacillus_coagulans_2-6.RAST (77415/17/1)	gene	hypothetical protein
BCO26_RS07475	BCO26_1453, BCO26_RS07475, GI:503625329, WP_013859405.1	Bacillus_coagulans_2-6.RAST (77415/17/1)	gene	Selenophosphate-dependent tRNA 2-selenouridine synthase
BCO26_RS00795	BCO26_RS00795, GI:503624032, WP_013858108.1	Bacillus_coagulans_2-6.RAST (77415/17/1)	gene	Transmembrane component of general energizing module of ECF transporters
BCO26_RS07480	BCO26_1454, BCO26_RS07480, GI:503625330, WP_013859406.1	Bacillus_coagulans_2-6.RAST (77415/17/1)	gene	Selenide,water dikinase (EC 2.7.9.3) @ selenocysteine-containing
BCO26_RS07485	BCO26_1455, BCO26_RS07485, GI:503625331, WP_013859407.1	Bacillus_coagulans_2-6.RAST (77415/17/1)	gene	hypothetical protein
BCO26_RS07495	BCO26_1457, BCO26_RS07495, GI:503625333, WP_013859409.1, proA	Bacillus_coagulans_2-6.RAST (77415/17/1)	gene	Gamma-glutamyl phosphate reductase (EC 1.2.1.41)
BCO26_RS07500	BCO26_1458, BCO26_RS07500, GI:503625334, WP_013859410.1	Bacillus_coagulans_2-6.RAST (77415/17/1)	gene	Glutamate 5-kinase (EC 2.7.2.11) / RNA-binding C-terminal domain PUA
BCO26_RS07505	BCO26_1459, BCO26_RS07505, GI:503625335, WP_013859411.1	Bacillus_coagulans_2-6.RAST (77415/17/1)	gene	Uncharacterized protein YjlC
BCO26_RS07510	BCO26_1460, BCO26_RS07510, GI:503625336, WP_013859412.1	Bacillus_coagulans_2-6.RAST (77415/17/1)	gene	NADH dehydrogenase (EC 1.6.99.3)
BCO26_RS07515	BCO26_1461, BCO26_RS07515, GI:503625337, WP_013859413.1	Bacillus_coagulans_2-6.RAST (77415/17/1)	gene	3'-to-5' oligoribonuclease B, Bacillus type
BCO26_RS07520	BCO26_1462, BCO26_RS07520, GI:503625338, WP_013859414.1	Bacillus_coagulans_2-6.RAST (77415/17/1)	gene	Ribose-5-phosphate isomerase A (EC 5.3.1.6)
BCO26_RS07525	BCO26_1463, BCO26_RS07525, GI:503625339, WP_013859415.1	Bacillus_coagulans_2-6.RAST (77415/17/1)	gene	Uncharacterized protein YvpB
BCO26_RS00800	BCO26_0149, BCO26_RS00800, GI:503624033, WP_013858109.1	Bacillus_coagulans_2-6.RAST (77415/17/1)	gene	tRNA pseudouridine(38-40) synthase (EC 5.4.99.12)
BCO26_RS07530	BCO26_1464, BCO26_RS07530, GI:754207146, WP_041819081.1	Bacillus_coagulans_2-6.RAST (77415/17/1)	gene	HTH-type transcriptional regulator tnrA
BCO26_RS07535	BCO26_1465, BCO26_RS07535, GI:503625341, WP_013859417.1, def	Bacillus_coagulans_2-6.RAST (77415/17/1)	gene	Peptide deformylase (EC 3.5.1.88)
BCO26_RS07540	BCO26_1467, BCO26_RS07540, GI:503625343, WP_013859419.1	Bacillus_coagulans_2-6.RAST (77415/17/1)	gene	hypothetical protein
BCO26_RS07545	BCO26_1468, BCO26_RS07545, GI:754207148, WP_041819083.1	Bacillus_coagulans_2-6.RAST (77415/17/1)	gene	Ferrous iron transporter FeoB
BCO26_RS07550	BCO26_1469, BCO26_RS07550, GI:503625345, WP_013859421.1	Bacillus_coagulans_2-6.RAST (77415/17/1)	gene	hypothetical protein
BCO26_RS07560	BCO26_1471, BCO26_RS07560, GI:503625347, WP_013859423.1	Bacillus_coagulans_2-6.RAST (77415/17/1)	gene	Argininosuccinate lyase (EC 4.3.2.1)
BCO26_RS07565	BCO26_1472, BCO26_RS07565, GI:503625348, WP_013859424.1	Bacillus_coagulans_2-6.RAST (77415/17/1)	gene	Argininosuccinate synthase (EC 6.3.4.5)
BCO26_RS07570	BCO26_1473, BCO26_RS07570, GI:503625349, WP_013859425.1	Bacillus_coagulans_2-6.RAST (77415/17/1)	gene	Ornithine carbamoyltransferase (EC 2.1.3.3)
BCO26_RS07575	BCO26_1474, BCO26_RS07575, GI:503625350, WP_013859426.1	Bacillus_coagulans_2-6.RAST (77415/17/1)	gene	Carbamoyl-phosphate synthase large chain (EC 6.3.5.5)
BCO26_RS00805	BCO26_0150, BCO26_RS00805, GI:503624034, WP_013858110.1	Bacillus_coagulans_2-6.RAST (77415/17/1)	gene	LSU ribosomal protein L13p (L13Ae)
BCO26_RS07585	BCO26_1476, BCO26_RS07585, GI:503625352, WP_013859428.1	Bacillus_coagulans_2-6.RAST (77415/17/1)	gene	N-acetylornithine aminotransferase (EC 2.6.1.11)
BCO26_RS07590	BCO26_1477, BCO26_RS07590, GI:503625353, WP_013859429.1	Bacillus_coagulans_2-6.RAST (77415/17/1)	gene	N-acetylglutamate kinase (EC 2.7.2.8)
BCO26_RS07595	BCO26_1478, BCO26_RS07595, GI:503625354, WP_013859430.1	Bacillus_coagulans_2-6.RAST (77415/17/1)	gene	Glutamate N-acetyltransferase (EC 2.3.1.35) @ N-acetylglutamate synthase (EC 2.3.1.1)
BCO26_RS07600	BCO26_1479, BCO26_RS07600, GI:503625355, WP_013859431.1, argC	Bacillus_coagulans_2-6.RAST (77415/17/1)	gene	N-acetyl-gamma-glutamyl-phosphate reductase (EC 1.2.1.38)
BCO26_RS07605	BCO26_1480, BCO26_RS07605, GI:503625356, WP_013859432.1	Bacillus_coagulans_2-6.RAST (77415/17/1)	gene	hypothetical protein
BCO26_RS07610	BCO26_1481, BCO26_RS07610, GI:503625357, WP_013859433.1	Bacillus_coagulans_2-6.RAST (77415/17/1)	gene	hypothetical protein
BCO26_RS07620	BCO26_1483, BCO26_RS07620, GI:754207154, WP_041819088.1	Bacillus_coagulans_2-6.RAST (77415/17/1)	gene	hypothetical protein
BCO26_RS07625	BCO26_1484, BCO26_RS07625, GI:503625360, WP_013859436.1	Bacillus_coagulans_2-6.RAST (77415/17/1)	gene	Cold shock protein of CSP family
BCO26_RS00810	BCO26_0151, BCO26_RS00810, GI:503624035, WP_013858111.1	Bacillus_coagulans_2-6.RAST (77415/17/1)	gene	SSU ribosomal protein S9p (S16e)
BCO26_RS07635	BCO26_1486, BCO26_RS07635, GI:503625362, WP_013859438.1	Bacillus_coagulans_2-6.RAST (77415/17/1)	gene	Muramoyltetrapeptide carboxypeptidase (EC 3.4.17.13)
BCO26_RS07640	BCO26_1487, BCO26_RS07640, GI:503625363, WP_013859439.1	Bacillus_coagulans_2-6.RAST (77415/17/1)	gene	D-alanyl-D-alanine carboxypeptidase (EC 3.4.16.4)
BCO26_RS07645	BCO26_1489, BCO26_RS07645, GI:503625365, WP_013859441.1	Bacillus_coagulans_2-6.RAST (77415/17/1)	gene	Acyl-ACP:1-acyl-sn-glycerol-3-phosphate acyltransferase (EC 2.3.1.n4)
BCO26_RS07650	BCO26_1490, BCO26_RS07650, GI:503625366, WP_013859442.1	Bacillus_coagulans_2-6.RAST (77415/17/1)	gene	Uncharacterized protein YneK
BCO26_RS07655	BCO26_1491, BCO26_RS07655, GI:503625367, WP_013859443.1	Bacillus_coagulans_2-6.RAST (77415/17/1)	gene	CcdC protein
BCO26_RS07660	BCO26_1492, BCO26_RS07660, GI:503625368, WP_013859444.1	Bacillus_coagulans_2-6.RAST (77415/17/1)	gene	Chemotaxis regulator - transmits chemoreceptor signals to flagellar motor components CheY
BCO26_RS07665	BCO26_1493, BCO26_RS07665, GI:503625369, WP_013859445.1	Bacillus_coagulans_2-6.RAST (77415/17/1)	gene	Cytochrome c-type biogenesis protein CcdA (DsbD analog)
BCO26_RS07670	BCO26_1494, BCO26_RS07670, GI:503625370, WP_013859446.1	Bacillus_coagulans_2-6.RAST (77415/17/1)	gene	UPF0154 protein YneF
BCO26_RS07675	BCO26_RS07675, GI:518550176, WP_019720383.1	Bacillus_coagulans_2-6.RAST (77415/17/1)	gene	alternate gene name: yoxF
BCO26_RS07680	BCO26_1496, BCO26_RS07680, GI:503625372, WP_013859448.1	Bacillus_coagulans_2-6.RAST (77415/17/1)	gene	Transketolase (EC 2.2.1.1)
BCO26_RS07685	BCO26_1497, BCO26_RS07685, GI:503625373, WP_013859449.1	Bacillus_coagulans_2-6.RAST (77415/17/1)	gene	FIG01227325: hypothetical protein
BCO26_RS07690	BCO26_1498, BCO26_RS07690, GI:503625374, WP_013859450.1	Bacillus_coagulans_2-6.RAST (77415/17/1)	gene	Site-specific recombinase, resolvase family
BCO26_RS07695	BCO26_RS07695, GI:516122434, WP_017553014.1	Bacillus_coagulans_2-6.RAST (77415/17/1)	gene	ABC transport protein, sugar-binding component yneA
BCO26_RS07700	BCO26_RS07700, GI:516122435, WP_017553015.1	Bacillus_coagulans_2-6.RAST (77415/17/1)	gene	SOS-response repressor and protease LexA (EC 3.4.21.88)
BCO26_RS07705	BCO26_1501, BCO26_RS07705, GI:503625377, WP_013859453.1	Bacillus_coagulans_2-6.RAST (77415/17/1)	gene	Glutamine synthetase type I (EC 6.3.1.2)
BCO26_RS07710	BCO26_1502, BCO26_RS07710, GI:518550704, WP_019720911.1	Bacillus_coagulans_2-6.RAST (77415/17/1)	gene	Transcriptional regulator GlnR
BCO26_RS07715	BCO26_1503, BCO26_RS07715, GI:503625379, WP_013859455.1	Bacillus_coagulans_2-6.RAST (77415/17/1)	gene	Uncharacterized protein Bsub YpbR
BCO26_RS07720	BCO26_1504, BCO26_RS07720, GI:503625380, WP_013859456.1	Bacillus_coagulans_2-6.RAST (77415/17/1)	gene	hypothetical protein
BCO26_RS00820	BCO26_0152, BCO26_RS00820, GI:503624036, WP_013858112.1, sat	Bacillus_coagulans_2-6.RAST (77415/17/1)	gene	Sulfate adenylyltransferase (EC 2.7.7.4)
BCO26_RS07730	BCO26_1506, BCO26_RS07730, GI:503625382, WP_013859458.1	Bacillus_coagulans_2-6.RAST (77415/17/1)	gene	Xanthine permease
BCO26_RS07735	BCO26_1507, BCO26_RS07735, GI:503625383, WP_013859459.1	Bacillus_coagulans_2-6.RAST (77415/17/1)	gene	Xanthine phosphoribosyltransferase (EC 2.4.2.22)
BCO26_RS07745	BCO26_1508, BCO26_RS07745, GI:754207160, WP_041819093.1	Bacillus_coagulans_2-6.RAST (77415/17/1)	gene	Thermostable carboxypeptidase 1 (EC 3.4.17.19)
BCO26_RS07750	BCO26_1509, BCO26_RS07750, GI:503625385, WP_013859461.1	Bacillus_coagulans_2-6.RAST (77415/17/1)	gene	23S rRNA (guanine(2445)-N(2))-methyltransferase (EC 2.1.1.173)
BCO26_RS07755	BCO26_1510, BCO26_RS07755, GI:503625386, WP_013859462.1	Bacillus_coagulans_2-6.RAST (77415/17/1)	gene	Cell division protein GpsB, coordinates the switch between cylindrical and septal cell wall synthesis by re-localization of PBP1
BCO26_RS07760	BCO26_1511, BCO26_RS07760, GI:503625387, WP_013859463.1	Bacillus_coagulans_2-6.RAST (77415/17/1)	gene	FIG005686: hypothetical protein
BCO26_RS07765	BCO26_RS07765, GI:516122447, WP_017553027.1	Bacillus_coagulans_2-6.RAST (77415/17/1)	gene	Inner spore coat protein D
BCO26_RS07775	BCO26_1513, BCO26_RS07775, GI:503625389, WP_013859465.1	Bacillus_coagulans_2-6.RAST (77415/17/1)	gene	Predicted exonuclease
BCO26_RS00825	BCO26_0153, BCO26_RS00825, GI:503624037, WP_013858113.1	Bacillus_coagulans_2-6.RAST (77415/17/1)	gene	Adenylylsulfate kinase (EC 2.7.1.25)
BCO26_RS07785	BCO26_1515, BCO26_RS07785, GI:503625391, WP_013859467.1	Bacillus_coagulans_2-6.RAST (77415/17/1)	gene	heat shock protein class I (low molecular weight)
BCO26_RS07795	BCO26_1517, BCO26_RS07795, GI:503625393, WP_013859469.1	Bacillus_coagulans_2-6.RAST (77415/17/1)	gene	hypothetical protein
BCO26_RS07800	BCO26_1518, BCO26_RS07800, GI:503625394, WP_013859470.1	Bacillus_coagulans_2-6.RAST (77415/17/1)	gene	hypothetical protein
BCO26_RS07810	BCO26_1520, BCO26_RS07810, GI:503625396, WP_013859472.1	Bacillus_coagulans_2-6.RAST (77415/17/1)	gene	RecU Holliday junction resolvase
BCO26_RS07815	BCO26_1521, BCO26_RS07815, GI:503625397, WP_013859473.1	Bacillus_coagulans_2-6.RAST (77415/17/1)	gene	Penicillin-binding protein 1A/1B @ Multimodular transpeptidase-transglycosylase
BCO26_RS07820	BCO26_1522, BCO26_RS07820, GI:503625398, WP_013859474.1	Bacillus_coagulans_2-6.RAST (77415/17/1)	gene	Endonuclease III (EC 4.2.99.18)
BCO26_RS07825	BCO26_1523, BCO26_RS07825, GI:503625399, WP_013859475.1	Bacillus_coagulans_2-6.RAST (77415/17/1)	gene	Chromosome replication initiation protein DnaD
BCO26_RS00830	BCO26_0154, BCO26_RS00830, GI:754206536, WP_041818589.1	Bacillus_coagulans_2-6.RAST (77415/17/1)	gene	Lysine-specific permease
BCO26_RS07830	6.1.1.22, BCO26_RS07830, GI:754207828, WP_041819662.1, asnC	Bacillus_coagulans_2-6.RAST (77415/17/1)	gene	Asparaginyl-tRNA synthetase (EC 6.1.1.22)
BCO26_RS07835	BCO26_1525, BCO26_RS07835, GI:503625401, WP_013859477.1	Bacillus_coagulans_2-6.RAST (77415/17/1)	gene	Aspartate aminotransferase (EC 2.6.1.1)
BCO26_RS07840	BCO26_1526, BCO26_RS07840, GI:503625402, WP_013859478.1	Bacillus_coagulans_2-6.RAST (77415/17/1)	gene	FIG01226722: hypothetical protein
BCO26_RS07845	BCO26_1527, BCO26_RS07845, GI:503625403, WP_013859479.1	Bacillus_coagulans_2-6.RAST (77415/17/1)	gene	DinG family ATP-dependent helicase YoaA
BCO26_RS07850	BCO26_1528, BCO26_RS07850, GI:754207169, WP_041819100.1	Bacillus_coagulans_2-6.RAST (77415/17/1)	gene	Aspartate 1-decarboxylase (EC 4.1.1.11)
BCO26_RS07855	BCO26_1529, BCO26_RS07855, GI:754207830, WP_041819664.1	Bacillus_coagulans_2-6.RAST (77415/17/1)	gene	Pantoate--beta-alanine ligase (EC 6.3.2.1)
BCO26_RS07860	BCO26_1530, BCO26_RS07860, GI:503625406, WP_013859482.1	Bacillus_coagulans_2-6.RAST (77415/17/1)	gene	3-methyl-2-oxobutanoate hydroxymethyltransferase (EC 2.1.2.11)
BCO26_RS07865	BCO26_1531, BCO26_RS07865, GI:754207173, WP_041819103.1	Bacillus_coagulans_2-6.RAST (77415/17/1)	gene	Biotin operon repressor / Biotin--protein ligase (EC 6.3.4.9)(EC 6.3.4.10)(EC 6.3.4.11)(EC 6.3.4.15)
BCO26_RS07870	BCO26_1532, BCO26_RS07870, GI:503625408, WP_013859484.1	Bacillus_coagulans_2-6.RAST (77415/17/1)	gene	CCA tRNA nucleotidyltransferase (EC 2.7.7.72)
BCO26_RS07875	BCO26_1533, BCO26_RS07875, GI:754207174, WP_041819104.1	Bacillus_coagulans_2-6.RAST (77415/17/1)	gene	UDP-N-acetylglucosamine:L-malate glycosyltransferase
BCO26_RS00835	BCO26_RS00835, GI:754206538, WP_041818591.1	Bacillus_coagulans_2-6.RAST (77415/17/1)	gene	Uncharacterized protein YbaK
BCO26_RS07885	BCO26_1535, BCO26_RS07885, GI:503625411, WP_013859487.1	Bacillus_coagulans_2-6.RAST (77415/17/1)	gene	4-hydroxy-tetrahydrodipicolinate reductase (EC 1.17.1.8)
BCO26_RS07890	BCO26_1536, BCO26_RS07890, GI:516122468, WP_017553048.1	Bacillus_coagulans_2-6.RAST (77415/17/1)	gene	MazG nucleotide pyrophosphohydrolase
BCO26_RS07895	BCO26_1537, BCO26_RS07895, GI:503625413, WP_013859489.1	Bacillus_coagulans_2-6.RAST (77415/17/1)	gene	Uncharacterized UPF0750 membrane protein YpjC
BCO26_RS07900	BCO26_1538, BCO26_RS07900, GI:503625414, WP_013859490.1	Bacillus_coagulans_2-6.RAST (77415/17/1)	gene	Substrate-specific component QueT (COG4708) of predicted queuosine-regulated ECF transporter
BCO26_RS07910	BCO26_1540, BCO26_RS07910, GI:503625416, WP_013859492.1	Bacillus_coagulans_2-6.RAST (77415/17/1)	gene	FIG01227150: hypothetical protein
BCO26_RS07915	BCO26_1541, BCO26_RS07915, GI:503625417, WP_013859493.1	Bacillus_coagulans_2-6.RAST (77415/17/1)	gene	Uncharacterized protein YpjA
BCO26_RS00110	BCO26_0018, BCO26_RS00110, GI:518551887, WP_019722094.1	Bacillus_coagulans_2-6.RAST (77415/17/1)	gene	DNA replication intiation control protein YabA
BCO26_RS00840	BCO26_0155, BCO26_RS00840, GI:503624039, WP_013858115.1	Bacillus_coagulans_2-6.RAST (77415/17/1)	gene	Germination-specific N-acetylmuramoyl-L-alanine amidase (EC 3.5.1.28), cell wall hydrolase CwlD
BCO26_RS07935	BCO26_1545, BCO26_RS07935, GI:754207179, WP_041819108.1	Bacillus_coagulans_2-6.RAST (77415/17/1)	gene	FIG013069: hypothetical protein co-occurring with TPR domain protein
BCO26_RS07940	BCO26_RS07940, GI:518550735, WP_019720942.1	Bacillus_coagulans_2-6.RAST (77415/17/1)	gene	UPF0302 protein YpiB
BCO26_RS07945	BCO26_1547, BCO26_RS07945, GI:503625423, WP_013859499.1	Bacillus_coagulans_2-6.RAST (77415/17/1)	gene	TPR-repeat-containing protein, putative component of Menaquinone-cytochrome C reductase
BCO26_RS07950	BCO26_1549, BCO26_RS07950, GI:503625425, WP_013859501.1	Bacillus_coagulans_2-6.RAST (77415/17/1)	gene	3-phosphoshikimate 1-carboxyvinyltransferase (EC 2.5.1.19)
BCO26_RS07965	BCO26_1552, BCO26_RS07965, GI:503625428, WP_013859504.1	Bacillus_coagulans_2-6.RAST (77415/17/1)	gene	Chorismate mutase II (EC 5.4.99.5)
BCO26_RS07970	BCO26_1553, BCO26_RS07970, GI:503625429, WP_013859505.1	Bacillus_coagulans_2-6.RAST (77415/17/1)	gene	3-dehydroquinate synthase (EC 4.2.3.4)
BCO26_RS07975	BCO26_1554, BCO26_RS07975, GI:503625430, WP_013859506.1	Bacillus_coagulans_2-6.RAST (77415/17/1)	gene	Chorismate synthase (EC 4.2.3.5)
BCO26_RS00845	BCO26_0156, BCO26_RS00845, GI:503624040, WP_013858116.1	Bacillus_coagulans_2-6.RAST (77415/17/1)	gene	Scaffold protein for [4Fe-4S] cluster assembly ApbC, MRP-like
BCO26_RS07980	BCO26_1555, BCO26_RS07980, GI:503625431, WP_013859507.1	Bacillus_coagulans_2-6.RAST (77415/17/1)	gene	Chemotaxis protein methyltransferase CheR (EC 2.1.1.80)
BCO26_RS07985	2.7.4.6, BCO26_1556, BCO26_RS07985, GI:516121838, WP_017552418.1	Bacillus_coagulans_2-6.RAST (77415/17/1)	gene	Nucleoside diphosphate kinase (EC 2.7.4.6)
BCO26_RS07990	BCO26_1557, BCO26_RS07990, GI:503625433, WP_013859509.1	Bacillus_coagulans_2-6.RAST (77415/17/1)	gene	Heptaprenyl diphosphate synthase component II (EC 2.5.1.30)
BCO26_RS08000	BCO26_1559, BCO26_RS08000, GI:503625435, WP_013859511.1	Bacillus_coagulans_2-6.RAST (77415/17/1)	gene	Heptaprenyl diphosphate synthase component I (EC 2.5.1.30)
BCO26_RS08015	BCO26_1561, BCO26_RS08015, GI:503625437, WP_013859513.1	Bacillus_coagulans_2-6.RAST (77415/17/1)	gene	DNA-binding protein HBsu
BCO26_RS08020	BCO26_1562, BCO26_RS08020, GI:503625438, WP_013859514.1	Bacillus_coagulans_2-6.RAST (77415/17/1)	gene	Stage IV sporulation protein A
BCO26_RS08030	BCO26_1564, BCO26_RS08030, GI:754207182, WP_041819111.1	Bacillus_coagulans_2-6.RAST (77415/17/1)	gene	FIG01226975: hypothetical protein
BCO26_RS08035	BCO26_1565, BCO26_RS08035, GI:503625441, WP_013859517.1, gpsA	Bacillus_coagulans_2-6.RAST (77415/17/1)	gene	Glycerol-3-phosphate dehydrogenase [NAD(P)+] (EC 1.1.1.94)
BCO26_RS08040	BCO26_1566, BCO26_RS08040, GI:503625442, WP_013859518.1, engA, yfgK, yphC	Bacillus_coagulans_2-6.RAST (77415/17/1)	gene	GTP-binding protein EngA
BCO26_RS08045	BCO26_RS08045, GI:754207184, WP_041819113.1	Bacillus_coagulans_2-6.RAST (77415/17/1)	gene	hypothetical protein
BCO26_RS08050	BCO26_1569, BCO26_RS08050, GI:503625445, WP_013859521.1	Bacillus_coagulans_2-6.RAST (77415/17/1)	gene	SSU ribosomal protein S1p
BCO26_RS08055	BCO26_1570, BCO26_RS08055, GI:503625446, WP_013859522.1	Bacillus_coagulans_2-6.RAST (77415/17/1)	gene	Cytidylate kinase (EC 2.7.4.25)
BCO26_RS08060	BCO26_1571, BCO26_RS08060, GI:503625447, WP_013859523.1	Bacillus_coagulans_2-6.RAST (77415/17/1)	gene	FIG01234995: hypothetical protein
BCO26_RS08070	BCO26_1573, BCO26_RS08070, GI:503625449, WP_013859525.1	Bacillus_coagulans_2-6.RAST (77415/17/1)	gene	Spore cortex-lytic enzyme, lytic transglycosylase SleB
BCO26_RS08075	BCO26_1574, BCO26_RS08075, GI:754207186, WP_041819115.1	Bacillus_coagulans_2-6.RAST (77415/17/1)	gene	Protease PrsW
BCO26_RS00855	BCO26_0157, BCO26_RS00855, GI:503624041, WP_013858117.1	Bacillus_coagulans_2-6.RAST (77415/17/1)	gene	Spore germination protein GerD
BCO26_RS08085	BCO26_1576, BCO26_RS08085, GI:503625452, WP_013859528.1	Bacillus_coagulans_2-6.RAST (77415/17/1)	gene	NAD-specific glutamate dehydrogenase (EC 1.4.1.2)
BCO26_RS08090	BCO26_1577, BCO26_RS08090, GI:503625453, WP_013859529.1	Bacillus_coagulans_2-6.RAST (77415/17/1)	gene	hypothetical protein
BCO26_RS08095	BCO26_1578, BCO26_RS08095, GI:503625454, WP_013859530.1	Bacillus_coagulans_2-6.RAST (77415/17/1)	gene	Uncharacterized metallophosphoesterase YpbG
BCO26_RS08100	BCO26_RS08100, GI:518550755, WP_019720962.1	Bacillus_coagulans_2-6.RAST (77415/17/1)	gene	Protein CotJA
BCO26_RS08105	BCO26_RS08105, GI:516123020, WP_017553600.1	Bacillus_coagulans_2-6.RAST (77415/17/1)	gene	Polypeptide composition of the spore coat protein CotJB
BCO26_RS08110	BCO26_RS08110, GI:754207189, WP_041819118.1	Bacillus_coagulans_2-6.RAST (77415/17/1)	gene	Manganese catalase (EC 1.11.1.6) => Spore coat protein CotJC
BCO26_RS08115	BCO26_1580, BCO26_RS08115, GI:503625456, WP_013859532.1	Bacillus_coagulans_2-6.RAST (77415/17/1)	gene	FIG01232489: hypothetical protein
BCO26_RS08120	BCO26_1581, BCO26_RS08120, GI:503625457, WP_013859533.1	Bacillus_coagulans_2-6.RAST (77415/17/1)	gene	hypothetical protein
BCO26_RS08125	BCO26_1582, BCO26_RS08125, GI:503625458, WP_013859534.1	Bacillus_coagulans_2-6.RAST (77415/17/1)	gene	CAAX amino terminal protease family protein
BCO26_RS08130	BCO26_1583, BCO26_RS08130, GI:754207190, WP_041819119.1	Bacillus_coagulans_2-6.RAST (77415/17/1)	gene	ATP-dependent DNA helicase RecQ
BCO26_RS00860	BCO26_RS00860, GI:754206546, WP_041818596.1	Bacillus_coagulans_2-6.RAST (77415/17/1)	gene	KinB signaling pathway activation protein
BCO26_RS08135	BCO26_1584, BCO26_RS08135, GI:503625460, WP_013859536.1	Bacillus_coagulans_2-6.RAST (77415/17/1)	gene	FIG00743178: hypothetical protein
BCO26_RS08140	BCO26_1585, BCO26_RS08140, GI:503625461, WP_013859537.1	Bacillus_coagulans_2-6.RAST (77415/17/1)	gene	Ferredoxin
BCO26_RS08145	BCO26_RS08145, GI:754207192, WP_041819121.1	Bacillus_coagulans_2-6.RAST (77415/17/1)	gene	Substrate-specific component RibU of riboflavin ECF transporter
BCO26_RS08150	BCO26_1587, BCO26_RS08150, GI:503625463, WP_013859539.1	Bacillus_coagulans_2-6.RAST (77415/17/1)	gene	hypothetical protein
BCO26_RS08155	BCO26_1588, BCO26_RS08155, GI:503625464, WP_013859540.1	Bacillus_coagulans_2-6.RAST (77415/17/1)	gene	Sensor histidine kinase ResE (EC 2.7.13.3)
BCO26_RS08160	BCO26_1589, BCO26_RS08160, GI:503625465, WP_013859541.1	Bacillus_coagulans_2-6.RAST (77415/17/1)	gene	DNA-binding response regulator ResD
BCO26_RS08165	BCO26_1590, BCO26_RS08165, GI:648413050, WP_026104801.1	Bacillus_coagulans_2-6.RAST (77415/17/1)	gene	Cytochrome c-type biogenesis protein CcsA/ResC
BCO26_RS08175	BCO26_1592, BCO26_RS08175, GI:503625468, WP_013859544.1	Bacillus_coagulans_2-6.RAST (77415/17/1)	gene	Cytochrome c-type biogenesis protein ResA
BCO26_RS08180	BCO26_1593, BCO26_RS08180, GI:503625469, WP_013859545.1	Bacillus_coagulans_2-6.RAST (77415/17/1)	gene	LSU rRNA pseudouridine(2605) synthase (EC 5.4.99.22)
BCO26_RS08185	BCO26_1594, BCO26_RS08185, GI:503625470, WP_013859546.1	Bacillus_coagulans_2-6.RAST (77415/17/1)	gene	Spore maturation protein B
BCO26_RS08190	BCO26_1595, BCO26_RS08190, GI:503625471, WP_013859547.1	Bacillus_coagulans_2-6.RAST (77415/17/1)	gene	Spore maturation protein A
BCO26_RS08195	BCO26_1596, BCO26_RS08195, GI:754207834, WP_041819668.1	Bacillus_coagulans_2-6.RAST (77415/17/1)	gene	D-alanyl-D-alanine carboxypeptidase (EC 3.4.16.4)
BCO26_RS08200	BCO26_1597, BCO26_RS08200, GI:503625473, WP_013859549.1	Bacillus_coagulans_2-6.RAST (77415/17/1)	gene	Segregation and condensation protein B
BCO26_RS08205	BCO26_1598, BCO26_RS08205, GI:503625474, WP_013859550.1	Bacillus_coagulans_2-6.RAST (77415/17/1)	gene	Segregation and condensation protein A
BCO26_RS08210	BCO26_1600, BCO26_RS08210, GI:516123034, WP_017553614.1	Bacillus_coagulans_2-6.RAST (77415/17/1)	gene	Protein RibT
BCO26_RS08215	BCO26_RS08215, GI:656143883, WP_029141276.1	Bacillus_coagulans_2-6.RAST (77415/17/1)	gene	Diaminopimelate decarboxylase (EC 4.1.1.20)
BCO26_RS08220	BCO26_1602, BCO26_RS08220, GI:503625478, WP_013859554.1	Bacillus_coagulans_2-6.RAST (77415/17/1)	gene	Stage V sporulation protein AF (SpoVAF)
BCO26_RS08225	BCO26_1603, BCO26_RS08225, GI:503625479, WP_013859555.1	Bacillus_coagulans_2-6.RAST (77415/17/1)	gene	Stage V sporulation protein AE2 (SpoVAE2)
BCO26_RS08230	BCO26_RS08230, GI:754207194, WP_041819123.1	Bacillus_coagulans_2-6.RAST (77415/17/1)	gene	Stage V sporulation protein AB (SpoVAB)
BCO26_RS08235	BCO26_RS08235, GI:516123039, WP_017553619.1	Bacillus_coagulans_2-6.RAST (77415/17/1)	gene	Stage V sporulation protein AA (SpoVAA)
BCO26_RS08240	BCO26_1606, BCO26_RS08240, GI:503625482, WP_013859558.1	Bacillus_coagulans_2-6.RAST (77415/17/1)	gene	RNA polymerase sporulation specific sigma factor SigF
BCO26_RS08245	BCO26_1607, BCO26_RS08245, GI:503625483, WP_013859559.1	Bacillus_coagulans_2-6.RAST (77415/17/1)	gene	Anti-sigma F factor (EC 2.7.11.1)
BCO26_RS08250	BCO26_1608, BCO26_RS08250, GI:503864112, WP_014098106.1	Bacillus_coagulans_2-6.RAST (77415/17/1)	gene	Anti-sigma F factor antagonist
BCO26_RS08255	BCO26_1609, BCO26_RS08255, GI:908639538, WP_049783559.1	Bacillus_coagulans_2-6.RAST (77415/17/1)	gene	D-alanyl-D-alanine carboxypeptidase (EC 3.4.16.4)
BCO26_RS08260	BCO26_1611, BCO26_RS08260, GI:503625487, WP_013859563.1	Bacillus_coagulans_2-6.RAST (77415/17/1)	gene	Site-specific tyrosine recombinase XerD
BCO26_RS08265	BCO26_1612, BCO26_RS08265, GI:503625488, WP_013859564.1	Bacillus_coagulans_2-6.RAST (77415/17/1)	gene	FIG01226426: hypothetical protein
BCO26_RS08270	BCO26_1613, BCO26_RS08270, GI:503625489, WP_013859565.1	Bacillus_coagulans_2-6.RAST (77415/17/1)	gene	Ferric uptake regulation protein FUR
BCO26_RS08275	BCO26_1614, BCO26_RS08275, GI:503625490, WP_013859566.1	Bacillus_coagulans_2-6.RAST (77415/17/1)	gene	Stage II sporulation protein M (SpoIIM)
BCO26_RS08280	BCO26_1615, BCO26_RS08280, GI:503625491, WP_013859567.1	Bacillus_coagulans_2-6.RAST (77415/17/1)	gene	Endonuclease Q, cleaves 5' to damaged DNA bases
BCO26_RS08285	BCO26_1616, BCO26_RS08285, GI:503625492, WP_013859568.1	Bacillus_coagulans_2-6.RAST (77415/17/1)	gene	ADP-ribose pyrophosphatase (EC 3.6.1.13)
BCO26_RS08295	BCO26_1618, BCO26_RS08295, GI:503625494, WP_013859570.1	Bacillus_coagulans_2-6.RAST (77415/17/1)	gene	Uncharacterized oxidoreductase YqkF
BCO26_RS08300	BCO26_RS08300, GI:737190559, WP_035176207.1	Bacillus_coagulans_2-6.RAST (77415/17/1)	gene	hypothetical protein
BCO26_RS08305	BCO26_1620, BCO26_RS08305, GI:516123049, WP_017553629.1	Bacillus_coagulans_2-6.RAST (77415/17/1)	gene	Protein XpaC
BCO26_RS08310	BCO26_1621, BCO26_RS08310, GI:503625497, WP_013859573.1	Bacillus_coagulans_2-6.RAST (77415/17/1)	gene	Uncharacterized protein YaaN
BCO26_RS08315	BCO26_1622, BCO26_RS08315, GI:503625498, WP_013859574.1	Bacillus_coagulans_2-6.RAST (77415/17/1)	gene	Uncharacterized membrane anchored protein YqkD
BCO26_RS08320	BCO26_1623, BCO26_RS08320, GI:754207196, WP_041819125.1	Bacillus_coagulans_2-6.RAST (77415/17/1)	gene	spore peptidoglycan hydrolase (N-acetylglucosaminidase) (EC 3.2.1.-)
BCO26_RS08325	BCO26_1624, BCO26_RS08325, GI:503625500, WP_013859576.1	Bacillus_coagulans_2-6.RAST (77415/17/1)	gene	Uncharacterized protein YqjX
BCO26_RS08330	BCO26_1625, BCO26_RS08330, GI:503625501, WP_013859577.1, polYB, yqjW	Bacillus_coagulans_2-6.RAST (77415/17/1)	gene	DNA polymerase IV (EC 2.7.7.7)
BCO26_RS08335	BCO26_1626, BCO26_RS08335, GI:503625502, WP_013859578.1	Bacillus_coagulans_2-6.RAST (77415/17/1)	gene	Oxidoreductase, short-chain dehydrogenase/reductase family
BCO26_RS08340	BCO26_1628, BCO26_RS08340, GI:503625504, WP_013859580.1	Bacillus_coagulans_2-6.RAST (77415/17/1)	gene	Pyrroline-5-carboxylate reductase (EC 1.5.1.2)
BCO26_RS08345	BCO26_1629, BCO26_RS08345, GI:503625505, WP_013859581.1	Bacillus_coagulans_2-6.RAST (77415/17/1)	gene	Ribonuclease Z (EC 3.1.26.11)
BCO26_RS08350	BCO26_1630, BCO26_RS08350, GI:503625506, WP_013859582.1	Bacillus_coagulans_2-6.RAST (77415/17/1)	gene	Glucose-6-phosphate 1-dehydrogenase (EC 1.1.1.49)
BCO26_RS08355	BCO26_1631, BCO26_RS08355, GI:503625507, WP_013859583.1	Bacillus_coagulans_2-6.RAST (77415/17/1)	gene	DNA polymerase IV (EC 2.7.7.7)
BCO26_RS08360	BCO26_RS08360, GI:754207836, WP_041819670.1	Bacillus_coagulans_2-6.RAST (77415/17/1)	gene	Positive regulator of CheA protein activity (CheW)
BCO26_RS08365	BCO26_1633, BCO26_RS08365, GI:503625509, WP_013859585.1	Bacillus_coagulans_2-6.RAST (77415/17/1)	gene	Uncharacterized peptidase YqjE
BCO26_RS08370	BCO26_1634, BCO26_RS08370, GI:656146570, WP_029142213.1	Bacillus_coagulans_2-6.RAST (77415/17/1)	gene	L,D-transpeptidase
BCO26_RS08375	BCO26_1635, BCO26_RS08375, GI:503625511, WP_013859587.1	Bacillus_coagulans_2-6.RAST (77415/17/1)	gene	UPF0403 protein YqiW
BCO26_RS08380	BCO26_1636, BCO26_RS08380, GI:503625512, WP_013859588.1	Bacillus_coagulans_2-6.RAST (77415/17/1)	gene	1-phosphofructokinase (EC 2.7.1.56)
BCO26_RS08385	BCO26_1637, BCO26_RS08385, GI:503625513, WP_013859589.1	Bacillus_coagulans_2-6.RAST (77415/17/1)	gene	Dihydrolipoamide acyltransferase component of branched-chain alpha-keto acid dehydrogenase complex (EC 2.3.1.168)
BCO26_RS08390	BCO26_1638, BCO26_RS08390, GI:503625514, WP_013859590.1	Bacillus_coagulans_2-6.RAST (77415/17/1)	gene	Branched-chain alpha-keto acid dehydrogenase, E1 component, beta subunit (EC 1.2.4.4)
BCO26_RS08395	BCO26_1639, BCO26_RS08395, GI:503625515, WP_013859591.1	Bacillus_coagulans_2-6.RAST (77415/17/1)	gene	Branched-chain alpha-keto acid dehydrogenase, E1 component, alpha subunit (EC 1.2.4.4)
BCO26_RS08400	BCO26_1640, BCO26_RS08400, GI:503625516, WP_013859592.1	Bacillus_coagulans_2-6.RAST (77415/17/1)	gene	Dihydrolipoamide dehydrogenase of branched-chain alpha-keto acid dehydrogenase (EC 1.8.1.4)
BCO26_RS08405	BCO26_1641, BCO26_RS08405, GI:503625517, WP_013859593.1	Bacillus_coagulans_2-6.RAST (77415/17/1)	gene	Branched-chain amino acid dehydrogenase [deaminating] (EC 1.4.1.9)(EC 1.4.1.23)
BCO26_RS08420	BCO26_1644, BCO26_RS08420, GI:503625520, WP_013859596.1	Bacillus_coagulans_2-6.RAST (77415/17/1)	gene	Uncharacterized membrane protein YqzF
BCO26_RS08430	BCO26_1646, BCO26_RS08430, GI:516122477, WP_017553057.1	Bacillus_coagulans_2-6.RAST (77415/17/1)	gene	Stage 0 sporulation two-component response regulator (Spo0A)
BCO26_RS00115	BCO26_0019, BCO26_RS00115, GI:754207733, WP_041819583.1	Bacillus_coagulans_2-6.RAST (77415/17/1)	gene	tRNA(1)(Val) (adenine(37)-N(6))-methyltransferase (EC 2.1.1.223)
BCO26_RS00890	BCO26_0162, BCO26_RS00890, GI:503624046, WP_013858122.1	Bacillus_coagulans_2-6.RAST (77415/17/1)	gene	polysaccharide deacetylase, putative
BCO26_RS08435	BCO26_1647, BCO26_RS08435, GI:754207200, WP_041819129.1	Bacillus_coagulans_2-6.RAST (77415/17/1)	gene	Stage IV sporulation protein B
BCO26_RS08440	BCO26_1648, BCO26_RS08440, GI:503625524, WP_013859600.1	Bacillus_coagulans_2-6.RAST (77415/17/1)	gene	DNA repair protein RecN
BCO26_RS08445	BCO26_1649, BCO26_RS08445, GI:503625525, WP_013859601.1	Bacillus_coagulans_2-6.RAST (77415/17/1)	gene	Arginine pathway regulatory protein ArgR, repressor of arg regulon
BCO26_RS08450	BCO26_1650, BCO26_RS08450, GI:503625526, WP_013859602.1	Bacillus_coagulans_2-6.RAST (77415/17/1)	gene	RNA binding methyltransferase FtsJ like
BCO26_RS08455	BCO26_1651, BCO26_RS08455, GI:754207202, WP_041819131.1	Bacillus_coagulans_2-6.RAST (77415/17/1)	gene	1-deoxy-D-xylulose 5-phosphate synthase (EC 2.2.1.7)
BCO26_RS08460	BCO26_RS08460, GI:754207203, WP_041819132.1	Bacillus_coagulans_2-6.RAST (77415/17/1)	gene	(2E,6E)-farnesyl diphosphate synthase (EC 2.5.1.10)
BCO26_RS08465	BCO26_1653, BCO26_RS08465, GI:503625529, WP_013859605.1	Bacillus_coagulans_2-6.RAST (77415/17/1)	gene	Exodeoxyribonuclease VII small subunit (EC 3.1.11.6)
BCO26_RS08470	BCO26_1654, BCO26_RS08470, GI:503625530, WP_013859606.1	Bacillus_coagulans_2-6.RAST (77415/17/1)	gene	Exodeoxyribonuclease VII large subunit (EC 3.1.11.6)
BCO26_RS08475	BCO26_1656, BCO26_RS08475, GI:503625532, WP_013859608.1	Bacillus_coagulans_2-6.RAST (77415/17/1)	gene	Methenyltetrahydrofolate cyclohydrolase (EC 3.5.4.9) / Methylenetetrahydrofolate dehydrogenase (NADP+) (EC 1.5.1.5)
BCO26_RS08480	BCO26_1657, BCO26_RS08480, GI:648413048, WP_026104799.1	Bacillus_coagulans_2-6.RAST (77415/17/1)	gene	Transcription termination protein NusB
BCO26_RS00895	BCO26_0163, BCO26_RS00895, GI:518551828, WP_019722035.1	Bacillus_coagulans_2-6.RAST (77415/17/1)	gene	hypothetical protein
BCO26_RS08485	BCO26_1658, BCO26_RS08485, GI:503625534, WP_013859610.1	Bacillus_coagulans_2-6.RAST (77415/17/1)	gene	Alkaline shock protein
BCO26_RS08490	BCO26_1659, BCO26_RS08490, GI:503625535, WP_013859611.1	Bacillus_coagulans_2-6.RAST (77415/17/1)	gene	Biotin carboxylase of acetyl-CoA carboxylase (EC 6.3.4.14)
BCO26_RS08495	BCO26_1660, BCO26_RS08495, GI:503625536, WP_013859612.1	Bacillus_coagulans_2-6.RAST (77415/17/1)	gene	Biotin carboxyl carrier protein of acetyl-CoA carboxylase
BCO26_RS08500	BCO26_1661, BCO26_RS08500, GI:503625537, WP_013859613.1	Bacillus_coagulans_2-6.RAST (77415/17/1)	gene	Stage III sporulation protein AH
BCO26_RS08505	BCO26_1662, BCO26_RS08505, GI:503625538, WP_013859614.1	Bacillus_coagulans_2-6.RAST (77415/17/1)	gene	Stage III sporulation protein AG
BCO26_RS08510	BCO26_1663, BCO26_RS08510, GI:656146539, WP_029142200.1	Bacillus_coagulans_2-6.RAST (77415/17/1)	gene	Stage III sporulation protein AF
BCO26_RS08520	BCO26_1665, BCO26_RS08520, GI:503625541, WP_013859617.1	Bacillus_coagulans_2-6.RAST (77415/17/1)	gene	Stage III sporulation protein AD
BCO26_RS08525	BCO26_1666, BCO26_RS08525, GI:503625542, WP_013859618.1	Bacillus_coagulans_2-6.RAST (77415/17/1)	gene	Stage III sporulation protein AC
BCO26_RS08530	BCO26_1667, BCO26_RS08530, GI:754207206, WP_041819135.1	Bacillus_coagulans_2-6.RAST (77415/17/1)	gene	Stage III sporulation protein AB
BCO26_RS08535	BCO26_1668, BCO26_RS08535, GI:518550401, WP_019720608.1	Bacillus_coagulans_2-6.RAST (77415/17/1)	gene	Stage III sporulation protein AA
BCO26_RS08540	BCO26_1669, BCO26_RS08540, GI:503625545, WP_013859621.1	Bacillus_coagulans_2-6.RAST (77415/17/1)	gene	Translation elongation factor P
BCO26_RS08545	BCO26_1670, BCO26_RS08545, GI:503625546, WP_013859622.1	Bacillus_coagulans_2-6.RAST (77415/17/1)	gene	Aminopeptidase YpdF (MP-, MA-, MS-, AP-, NP- specific)
BCO26_RS08550	BCO26_RS08550, GI:656146528, WP_029142195.1	Bacillus_coagulans_2-6.RAST (77415/17/1)	gene	3-dehydroquinate dehydratase II (EC 4.2.1.10)
BCO26_RS08555	BCO26_1672, BCO26_RS08555, GI:503625548, WP_013859624.1	Bacillus_coagulans_2-6.RAST (77415/17/1)	gene	Uncharacterized membrane protein YqhR
BCO26_RS08560	BCO26_1673, BCO26_RS08560, GI:503625549, WP_013859625.1	Bacillus_coagulans_2-6.RAST (77415/17/1)	gene	Uncharacterized protein YqhQ
BCO26_RS08565	BCO26_RS08565, GI:754207209, WP_041819137.1	Bacillus_coagulans_2-6.RAST (77415/17/1)	gene	Uncharacterized membrane protein YqhP
BCO26_RS08570	BCO26_1675, BCO26_RS08570, GI:503625551, WP_013859627.1	Bacillus_coagulans_2-6.RAST (77415/17/1)	gene	Uncharacterized lipase YqhO
BCO26_RS08580	BCO26_1679, BCO26_RS08580, GI:503625555, WP_013859631.1	Bacillus_coagulans_2-6.RAST (77415/17/1)	gene	Ribonucleotide reductase of class II (coenzyme B12-dependent) (EC 1.17.4.1)
BCO26_RS00905	BCO26_0165, BCO26_RS00905, GI:648413044, WP_026104795.1	Bacillus_coagulans_2-6.RAST (77415/17/1)	gene	Cytochrome d ubiquinol oxidase subunit II (EC 1.10.3.-)
BCO26_RS08585	BCO26_1680, BCO26_RS08585, GI:503625556, WP_013859632.1	Bacillus_coagulans_2-6.RAST (77415/17/1)	gene	Octanoate-[acyl-carrier-protein]-protein-N-octanoyltransferase, LipM (EC 2.3.1.181)
BCO26_RS08590	BCO26_1681, BCO26_RS08590, GI:503625557, WP_013859633.1	Bacillus_coagulans_2-6.RAST (77415/17/1)	gene	Rhodanese-like domain protein
BCO26_RS08595	BCO26_1682, BCO26_RS08595, GI:503625558, WP_013859634.1	Bacillus_coagulans_2-6.RAST (77415/17/1)	gene	Glycine dehydrogenase [decarboxylating] (glycine cleavage system P2 protein) (EC 1.4.4.2)
BCO26_RS08600	1.4.4.2, BCO26_1683, BCO26_RS08600, GI:656143961, WP_029141284.1	Bacillus_coagulans_2-6.RAST (77415/17/1)	gene	Glycine dehydrogenase [decarboxylating] (glycine cleavage system P1 protein) (EC 1.4.4.2)
BCO26_RS08605	BCO26_1684, BCO26_RS08605, GI:503625560, WP_013859636.1	Bacillus_coagulans_2-6.RAST (77415/17/1)	gene	Aminomethyltransferase (glycine cleavage system T protein) (EC 2.1.2.10)
BCO26_RS08610	BCO26_1685, BCO26_RS08610, GI:503625561, WP_013859637.1	Bacillus_coagulans_2-6.RAST (77415/17/1)	gene	Superfamily II DNA/RNA helicases, SNF2 family
BCO26_RS08615	BCO26_1686, BCO26_RS08615, GI:503625562, WP_013859638.1	Bacillus_coagulans_2-6.RAST (77415/17/1)	gene	Conserved protein YqhG
BCO26_RS08620	BCO26_1687, BCO26_RS08620, GI:503625563, WP_013859639.1	Bacillus_coagulans_2-6.RAST (77415/17/1)	gene	Shikimate kinase I (EC 2.7.1.71)
BCO26_RS08625	BCO26_1688, BCO26_RS08625, GI:503625564, WP_013859640.1	Bacillus_coagulans_2-6.RAST (77415/17/1)	gene	hypothetical protein
BCO26_RS08630	BCO26_1689, BCO26_RS08630, GI:503625565, WP_013859641.1	Bacillus_coagulans_2-6.RAST (77415/17/1)	gene	hypothetical protein
BCO26_RS00910	BCO26_0166, BCO26_RS00910, GI:503624050, WP_013858126.1	Bacillus_coagulans_2-6.RAST (77415/17/1)	gene	Transport ATP-binding protein CydC
BCO26_RS08635	BCO26_RS08635, GI:516122981, WP_017553561.1	Bacillus_coagulans_2-6.RAST (77415/17/1)	gene	hypothetical protein
BCO26_RS08640	BCO26_1692, BCO26_RS08640, GI:518550387, WP_019720594.1	Bacillus_coagulans_2-6.RAST (77415/17/1)	gene	hypothetical protein
BCO26_RS08645	BCO26_1693, BCO26_RS08645, GI:503625569, WP_013859645.1	Bacillus_coagulans_2-6.RAST (77415/17/1)	gene	Late competence protein ComGC, access of DNA to ComEA, FIG007487
BCO26_RS08650	BCO26_1694, BCO26_RS08650, GI:503625570, WP_013859646.1	Bacillus_coagulans_2-6.RAST (77415/17/1)	gene	Late competence protein ComGB, access of DNA to ComEA
BCO26_RS08655	BCO26_1695, BCO26_RS08655, GI:503625571, WP_013859647.1	Bacillus_coagulans_2-6.RAST (77415/17/1)	gene	Late competence protein ComGA, access of DNA to ComEA
BCO26_RS08660	BCO26_1696, BCO26_RS08660, GI:503625572, WP_013859648.1	Bacillus_coagulans_2-6.RAST (77415/17/1)	gene	Transcriptional regulator
BCO26_RS08665	BCO26_RS08665, GI:503864025, WP_014098019.1	Bacillus_coagulans_2-6.RAST (77415/17/1)	gene	Uncharacterized membrane protein YqgY
BCO26_RS08670	BCO26_1697, BCO26_RS08670, GI:503625573, WP_013859649.1	Bacillus_coagulans_2-6.RAST (77415/17/1)	gene	MBL-fold metallo-hydrolase superfamily
BCO26_RS08680	BCO26_1699, BCO26_RS08680, GI:754207212, WP_041819140.1	Bacillus_coagulans_2-6.RAST (77415/17/1)	gene	Glucokinase (EC 2.7.1.2)
BCO26_RS08685	BCO26_1700, BCO26_RS08685, GI:503625576, WP_013859652.1	Bacillus_coagulans_2-6.RAST (77415/17/1)	gene	Uncharacterized protein YqgQ
BCO26_RS00915	BCO26_0167, BCO26_RS00915, GI:503624051, WP_013858127.1	Bacillus_coagulans_2-6.RAST (77415/17/1)	gene	Efflux ABC transporter for glutathione/L-cysteine, essential for assembly of bd-type respiratory oxidases => CydD subunit
BCO26_RS08695	BCO26_1701, BCO26_RS08695, GI:754207215, WP_041819143.1	Bacillus_coagulans_2-6.RAST (77415/17/1)	gene	hypothetical protein
BCO26_RS08705	BCO26_1703, BCO26_RS08705, GI:503625579, WP_013859655.1	Bacillus_coagulans_2-6.RAST (77415/17/1)	gene	FIG00673130: hypothetical protein
BCO26_RS08710	BCO26_1704, BCO26_RS08710, GI:503625580, WP_013859656.1	Bacillus_coagulans_2-6.RAST (77415/17/1)	gene	Penicillin-binding protein BA2637
BCO26_RS08715	BCO26_1705, BCO26_RS08715, GI:503625581, WP_013859657.1	Bacillus_coagulans_2-6.RAST (77415/17/1)	gene	Uncharacterized MFS-type transporter YqgE
BCO26_RS08720	BCO26_1706, BCO26_RS08720, GI:503625582, WP_013859658.1	Bacillus_coagulans_2-6.RAST (77415/17/1)	gene	Superoxide dismutase [Mn] (EC 1.15.1.1)
BCO26_RS08725	BCO26_1707, BCO26_RS08725, GI:503625583, WP_013859659.1	Bacillus_coagulans_2-6.RAST (77415/17/1)	gene	FIG01226427: hypothetical protein
BCO26_RS08730	BCO26_1708, BCO26_RS08730, GI:754207217, WP_041819145.1	Bacillus_coagulans_2-6.RAST (77415/17/1)	gene	(E)-4-hydroxy-3-methylbut-2-enyl-diphosphate synthase (flavodoxin) (EC 1.17.7.3)
BCO26_RS08735	BCO26_1709, BCO26_RS08735, GI:503625585, WP_013859661.1	Bacillus_coagulans_2-6.RAST (77415/17/1)	gene	HAD-superfamily hydrolase-like protein
BCO26_RS08740	BCO26_1710, BCO26_RS08740, GI:503625586, WP_013859662.1	Bacillus_coagulans_2-6.RAST (77415/17/1)	gene	Zinc uptake regulation protein Zur
BCO26_RS08745	BCO26_1711, BCO26_RS08745, GI:503625587, WP_013859663.1	Bacillus_coagulans_2-6.RAST (77415/17/1)	gene	Zinc ABC transporter, permease protein ZnuB
BCO26_RS08750	BCO26_1712, BCO26_RS08750, GI:503625588, WP_013859664.1	Bacillus_coagulans_2-6.RAST (77415/17/1)	gene	Zinc ABC transporter, ATP-binding protein ZnuC
BCO26_RS08755	BCO26_1714, BCO26_RS08755, GI:503625590, WP_013859666.1	Bacillus_coagulans_2-6.RAST (77415/17/1)	gene	FIG01226688: hypothetical protein
BCO26_RS08760	BCO26_1715, BCO26_RS08760, GI:754207219, WP_041819147.1	Bacillus_coagulans_2-6.RAST (77415/17/1)	gene	hypothetical protein
BCO26_RS08765	BCO26_1716, BCO26_RS08765, GI:503625592, WP_013859668.1	Bacillus_coagulans_2-6.RAST (77415/17/1)	gene	Endonuclease IV (EC 3.1.21.2)
BCO26_RS08770	BCO26_1717, BCO26_RS08770, GI:503625593, WP_013859669.1	Bacillus_coagulans_2-6.RAST (77415/17/1)	gene	DEAD-box ATP-dependent RNA helicase CshB (EC 3.6.4.13)
BCO26_RS08775	BCO26_RS08775, GI:754207221, WP_041819149.1	Bacillus_coagulans_2-6.RAST (77415/17/1)	gene	VrrA protein
BCO26_RS08785	BCO26_1720, BCO26_RS08785, GI:503625596, WP_013859672.1	Bacillus_coagulans_2-6.RAST (77415/17/1)	gene	4-hydroxy-3-methylbut-2-enyl diphosphate reductase (EC 1.17.7.4)
BCO26_RS08790	BCO26_1721, BCO26_RS08790, GI:503625597, WP_013859673.1	Bacillus_coagulans_2-6.RAST (77415/17/1)	gene	GTP cyclohydrolase 1 type 2 homolog YbgI
BCO26_RS08795	BCO26_1722, BCO26_RS08795, GI:503625598, WP_013859674.1	Bacillus_coagulans_2-6.RAST (77415/17/1)	gene	tRNA (adenine(22)-N(1))-methyltransferase (EC 2.1.1.217)
BCO26_RS08800	BCO26_1723, BCO26_RS08800, GI:503625599, WP_013859675.1	Bacillus_coagulans_2-6.RAST (77415/17/1)	gene	Membrane-attached cytochrome c550
BCO26_RS08805	BCO26_1724, BCO26_RS08805, GI:503625600, WP_013859676.1	Bacillus_coagulans_2-6.RAST (77415/17/1)	gene	FIG01242901: hypothetical protein
BCO26_RS08810	BCO26_1725, BCO26_RS08810, GI:503625601, WP_013859677.1	Bacillus_coagulans_2-6.RAST (77415/17/1)	gene	RNA polymerase sigma factor RpoD
BCO26_RS08815	BCO26_1727, BCO26_RS08815, GI:754207225, WP_041819153.1	Bacillus_coagulans_2-6.RAST (77415/17/1)	gene	DNA primase DnaG
BCO26_RS08820	BCO26_RS08820, GI:754207227, WP_041819155.1	Bacillus_coagulans_2-6.RAST (77415/17/1)	gene	Phosphoenolpyruvate synthase regulatory protein
BCO26_RS08825	BCO26_1729, BCO26_RS08825, GI:503625605, WP_013859681.1	Bacillus_coagulans_2-6.RAST (77415/17/1)	gene	Transcriptional repressor CcpN, MarR family
BCO26_RS08830	BCO26_1730, BCO26_RS08830, GI:503625606, WP_013859682.1	Bacillus_coagulans_2-6.RAST (77415/17/1)	gene	DNA recombination and repair protein RecO
BCO26_RS08835	BCO26_1732, BCO26_RS08835, GI:503625608, WP_013859684.1, bex, era, rbaA, sdgE, yqfH	Bacillus_coagulans_2-6.RAST (77415/17/1)	gene	GTP-binding protein Era
BCO26_RS00995	BCO26_0171, BCO26_RS00995, GI:503624053, WP_013858129.1	Bacillus_coagulans_2-6.RAST (77415/17/1)	gene	Arginase (EC 3.5.3.1)
BCO26_RS08840	BCO26_1733, BCO26_RS08840, GI:503625609, WP_013859685.1	Bacillus_coagulans_2-6.RAST (77415/17/1)	gene	Diacylglycerol kinase (EC 2.7.1.107)
BCO26_RS08845	BCO26_1734, BCO26_RS08845, GI:503625610, WP_013859686.1	Bacillus_coagulans_2-6.RAST (77415/17/1)	gene	Metal-dependent hydrolase YbeY, involved in rRNA and/or ribosome maturation and assembly
BCO26_RS08855	BCO26_1736, BCO26_RS08855, GI:503625612, WP_013859688.1	Bacillus_coagulans_2-6.RAST (77415/17/1)	gene	Phosphate starvation-inducible protein PhoH, predicted ATPase
BCO26_RS08860	BCO26_1737, BCO26_RS08860, GI:754207230, WP_041819158.1	Bacillus_coagulans_2-6.RAST (77415/17/1)	gene	Stage IV sporulation protein
BCO26_RS08865	BCO26_1738, BCO26_RS08865, GI:503625614, WP_013859690.1	Bacillus_coagulans_2-6.RAST (77415/17/1)	gene	Uncharacterized protein YqfC
BCO26_RS08875	BCO26_1739, BCO26_RS08875, GI:656143954, WP_029141283.1	Bacillus_coagulans_2-6.RAST (77415/17/1)	gene	Transamidase GatB domain protein
BCO26_RS08880	BCO26_RS08880, GI:516122034, WP_017552614.1	Bacillus_coagulans_2-6.RAST (77415/17/1)	gene	SSU ribosomal protein S21p
BCO26_RS08885	BCO26_1740, BCO26_RS08885, GI:503625616, WP_013859692.1	Bacillus_coagulans_2-6.RAST (77415/17/1)	gene	Acylphosphate phosphohydrolase (EC 3.6.1.7)
BCO26_RS01000	BCO26_0172, BCO26_RS01000, GI:503624054, WP_013858130.1	Bacillus_coagulans_2-6.RAST (77415/17/1)	gene	hypothetical protein
BCO26_RS08890	BCO26_1741, BCO26_RS08890, GI:503625617, WP_013859693.1	Bacillus_coagulans_2-6.RAST (77415/17/1)	gene	Sodium-dependent phosphate transporter
BCO26_RS08895	BCO26_1742, BCO26_RS08895, GI:503625618, WP_013859694.1	Bacillus_coagulans_2-6.RAST (77415/17/1)	gene	tRNA t(6)A37-methylthiotransferase (EC 2.8.4.5)
BCO26_RS08900	BCO26_1743, BCO26_RS08900, GI:503625619, WP_013859695.1	Bacillus_coagulans_2-6.RAST (77415/17/1)	gene	16S rRNA (uracil(1498)-N(3))-methyltransferase (EC 2.1.1.193)
BCO26_RS08905	BCO26_1744, BCO26_RS08905, GI:503625620, WP_013859696.1	Bacillus_coagulans_2-6.RAST (77415/17/1)	gene	Ribosomal protein L11 methyltransferase
BCO26_RS08910	BCO26_1745, BCO26_RS08910, GI:503625621, WP_013859697.1	Bacillus_coagulans_2-6.RAST (77415/17/1)	gene	Chaperone protein DnaJ
BCO26_RS08915	BCO26_1746, BCO26_RS08915, GI:503625622, WP_013859698.1, dnaK	Bacillus_coagulans_2-6.RAST (77415/17/1)	gene	Chaperone protein DnaK
BCO26_RS08920	BCO26_1747, BCO26_RS08920, GI:503625623, WP_013859699.1	Bacillus_coagulans_2-6.RAST (77415/17/1)	gene	Heat shock protein GrpE
BCO26_RS08925	BCO26_1748, BCO26_RS08925, GI:656145740, WP_029141910.1	Bacillus_coagulans_2-6.RAST (77415/17/1)	gene	Heat-inducible transcription repressor HrcA
BCO26_RS08930	BCO26_1749, BCO26_RS08930, GI:503625625, WP_013859701.1	Bacillus_coagulans_2-6.RAST (77415/17/1)	gene	Oxygen-independent coproporphyrinogen-III oxidase-like protein YggW
BCO26_RS08935	BCO26_1750, BCO26_RS08935, GI:503625626, WP_013859702.1	Bacillus_coagulans_2-6.RAST (77415/17/1)	gene	Translation elongation factor LepA
BCO26_RS00120	BCO26_0020, BCO26_RS00120, GI:503623908, WP_013857984.1	Bacillus_coagulans_2-6.RAST (77415/17/1)	gene	hypothetical protein
BCO26_RS01005	BCO26_0173, BCO26_RS01005, GI:503624055, WP_013858131.1	Bacillus_coagulans_2-6.RAST (77415/17/1)	gene	RNA polymerase sigma factor SigW
BCO26_RS08940	BCO26_RS08940, GI:754207232, WP_041819160.1	Bacillus_coagulans_2-6.RAST (77415/17/1)	gene	Stage II sporulation protein P
BCO26_RS08945	3.4.24.78, BCO26_1752, BCO26_RS08945, GI:908639540, WP_049783561.1	Bacillus_coagulans_2-6.RAST (77415/17/1)	gene	Spore germination endopeptidase Gpr (EC 3.4.24.78)
BCO26_RS08950	BCO26_1753, BCO26_RS08950, GI:503625629, WP_013859705.1	Bacillus_coagulans_2-6.RAST (77415/17/1)	gene	SSU ribosomal protein S20p
BCO26_RS08955	BCO26_1754, BCO26_RS08955, GI:503625630, WP_013859706.1	Bacillus_coagulans_2-6.RAST (77415/17/1)	gene	DNA polymerase III delta subunit (EC 2.7.7.7)
BCO26_RS08965	BCO26_1755, BCO26_RS08965, GI:754207238, WP_041819166.1	Bacillus_coagulans_2-6.RAST (77415/17/1)	gene	DNA internalization-related competence protein ComEC/Rec2
BCO26_RS08970	BCO26_RS08970, GI:516122019, WP_017552599.1	Bacillus_coagulans_2-6.RAST (77415/17/1)	gene	dCMP deaminase (EC 3.5.4.12) @ Late competence protein ComEB
BCO26_RS08975	BCO26_1757, BCO26_RS08975, GI:503625633, WP_013859709.1	Bacillus_coagulans_2-6.RAST (77415/17/1)	gene	Late competence protein ComEA, DNA receptor
BCO26_RS08980	BCO26_1758, BCO26_RS08980, GI:503625634, WP_013859710.1	Bacillus_coagulans_2-6.RAST (77415/17/1)	gene	Late competence protein ComER, proline oxidase (EC 1.5.1.2)
BCO26_RS08985	BCO26_1759, BCO26_RS08985, GI:503625635, WP_013859711.1	Bacillus_coagulans_2-6.RAST (77415/17/1)	gene	FIG145533: Methyltransferase (EC 2.1.1.-)
BCO26_RS08990	BCO26_1760, BCO26_RS08990, GI:503625636, WP_013859712.1	Bacillus_coagulans_2-6.RAST (77415/17/1)	gene	Ribosomal silencing factor RsfA
BCO26_RS01010	BCO26_0174, BCO26_RS01010, GI:503624056, WP_013858132.1	Bacillus_coagulans_2-6.RAST (77415/17/1)	gene	FIG01231938: hypothetical protein
BCO26_RS08995	BCO26_1761, BCO26_RS08995, GI:503625637, WP_013859713.1	Bacillus_coagulans_2-6.RAST (77415/17/1)	gene	Hydrolase (HAD superfamily), YqeK
BCO26_RS09000	BCO26_1762, BCO26_RS09000, GI:503625638, WP_013859714.1	Bacillus_coagulans_2-6.RAST (77415/17/1)	gene	Nicotinate-nucleotide adenylyltransferase (EC 2.7.7.18)
BCO26_RS09005	BCO26_1763, BCO26_RS09005, GI:503625639, WP_013859715.1	Bacillus_coagulans_2-6.RAST (77415/17/1)	gene	RNA-binding protein YhbY
BCO26_RS09010	BCO26_1764, BCO26_RS09010, GI:503625640, WP_013859716.1	Bacillus_coagulans_2-6.RAST (77415/17/1)	gene	Shikimate 5-dehydrogenase I alpha (EC 1.1.1.25)
BCO26_RS09015	BCO26_1765, BCO26_RS09015, GI:503625641, WP_013859717.1	Bacillus_coagulans_2-6.RAST (77415/17/1)	gene	GTP-binding protein YqeH, required for biogenesis of 30S ribosome subunit
BCO26_RS09020	BCO26_1766, BCO26_RS09020, GI:754207847, WP_041819679.1	Bacillus_coagulans_2-6.RAST (77415/17/1)	gene	FIG001553: Hydrolase, HAD subfamily IIIA
BCO26_RS01015	BCO26_0175, BCO26_RS01015, GI:503624057, WP_013858133.1	Bacillus_coagulans_2-6.RAST (77415/17/1)	gene	Diadenylate cyclase spyDAC,Bacterial checkpoint controller DisA with nucleotide-binding domain
BCO26_RS01020	BCO26_0176, BCO26_RS01020, GI:503624058, WP_013858134.1	Bacillus_coagulans_2-6.RAST (77415/17/1)	gene	hypothetical protein
BCO26_RS09125	BCO26_1785, BCO26_RS09125, GI:503625661, WP_013859737.1	Bacillus_coagulans_2-6.RAST (77415/17/1)	gene	Cobalt/zinc/cadmium resistance protein CzcD
BCO26_RS09145	BCO26_1788, BCO26_RS09145, GI:503625664, WP_013859740.1	Bacillus_coagulans_2-6.RAST (77415/17/1)	gene	Alkyl hydroperoxide reductase protein F
BCO26_RS09150	BCO26_1789, BCO26_RS09150, GI:503625665, WP_013859741.1	Bacillus_coagulans_2-6.RAST (77415/17/1)	gene	Alkyl hydroperoxide reductase protein C (EC 1.11.1.15)
BCO26_RS01025	BCO26_0177, BCO26_RS01025, GI:503624059, WP_013858135.1	Bacillus_coagulans_2-6.RAST (77415/17/1)	gene	Phosphoglucosamine mutase (EC 5.4.2.10)
BCO26_RS09160	BCO26_1792, BCO26_RS09160, GI:503625668, WP_013859744.1	Bacillus_coagulans_2-6.RAST (77415/17/1)	gene	hypothetical protein
BCO26_RS09165	BCO26_1793, BCO26_RS09165, GI:503625669, WP_013859745.1	Bacillus_coagulans_2-6.RAST (77415/17/1)	gene	5'-methylthioadenosine nucleosidase (EC 3.2.2.16) @ S-adenosylhomocysteine nucleosidase (EC 3.2.2.9)
BCO26_RS09170	BCO26_1794, BCO26_RS09170, GI:503625670, WP_013859746.1	Bacillus_coagulans_2-6.RAST (77415/17/1)	gene	Uncharacterized protein YrzA
BCO26_RS09175	BCO26_1795, BCO26_RS09175, GI:503625671, WP_013859747.1	Bacillus_coagulans_2-6.RAST (77415/17/1)	gene	Hypothetical protein perhaps functionally coupled to transcription elongation factor GreA
BCO26_RS09180	BCO26_1796, BCO26_RS09180, GI:503625672, WP_013859748.1	Bacillus_coagulans_2-6.RAST (77415/17/1)	gene	Transcription elongation factor GreA
BCO26_RS09185	BCO26_1797, BCO26_RS09185, GI:503625673, WP_013859749.1	Bacillus_coagulans_2-6.RAST (77415/17/1)	gene	Uridine kinase (EC 2.7.1.48)
BCO26_RS09190	BCO26_1798, BCO26_RS09190, GI:503625674, WP_013859750.1	Bacillus_coagulans_2-6.RAST (77415/17/1)	gene	FIG011945: O-methyltransferase family protein
BCO26_RS09200	BCO26_1800, BCO26_RS09200, GI:503625676, WP_013859752.1	Bacillus_coagulans_2-6.RAST (77415/17/1)	gene	UPF0473 protein YrzB
BCO26_RS01030	BCO26_0179, BCO26_RS01030, GI:503624061, WP_013858137.1	Bacillus_coagulans_2-6.RAST (77415/17/1)	gene	Glutamine--fructose-6-phosphate aminotransferase [isomerizing] (EC 2.6.1.16)
BCO26_RS09205	BCO26_1801, BCO26_RS09205, GI:503625677, WP_013859753.1	Bacillus_coagulans_2-6.RAST (77415/17/1)	gene	Putative pre-16S rRNA nuclease YqgF
BCO26_RS09210	BCO26_1802, BCO26_RS09210, GI:503625678, WP_013859754.1	Bacillus_coagulans_2-6.RAST (77415/17/1)	gene	UPF0297 protein YrzL
BCO26_RS09215	BCO26_1803, BCO26_RS09215, GI:503625679, WP_013859755.1, alaS	Bacillus_coagulans_2-6.RAST (77415/17/1)	gene	Alanyl-tRNA synthetase (EC 6.1.1.7)
BCO26_RS09220	BCO26_1804, BCO26_RS09220, GI:503625680, WP_013859756.1	Bacillus_coagulans_2-6.RAST (77415/17/1)	gene	UPF0118 membrane protein YrrI
BCO26_RS09230	BCO26_1806, BCO26_RS09230, GI:503625682, WP_013859758.1	Bacillus_coagulans_2-6.RAST (77415/17/1)	gene	Uncharacterized protein Bsu2741.5
BCO26_RS09235	BCO26_1807, BCO26_RS09235, GI:754207247, WP_041819174.1	Bacillus_coagulans_2-6.RAST (77415/17/1)	gene	hypothetical protein
BCO26_RS09240	BCO26_1808, BCO26_RS09240, GI:754207249, WP_041819176.1	Bacillus_coagulans_2-6.RAST (77415/17/1)	gene	RecD-like DNA helicase YrrC
BCO26_RS09245	BCO26_1809, BCO26_RS09245, GI:503625685, WP_013859761.1	Bacillus_coagulans_2-6.RAST (77415/17/1)	gene	Tetratricopeptide repeat (TPR) family protein
BCO26_RS09250	BCO26_1810, BCO26_RS09250, GI:503625686, WP_013859762.1	Bacillus_coagulans_2-6.RAST (77415/17/1)	gene	tRNA-specific 2-thiouridylase MnmA (EC 2.8.1.13)
BCO26_RS09255	BCO26_1811, BCO26_RS09255, GI:754207251, WP_041819178.1	Bacillus_coagulans_2-6.RAST (77415/17/1)	gene	Cysteine desulfurase (EC 2.8.1.7)
BCO26_RS09260	BCO26_1812, BCO26_RS09260, GI:503625688, WP_013859764.1	Bacillus_coagulans_2-6.RAST (77415/17/1)	gene	Iron-sulfur cluster regulator IscR
BCO26_RS09265	BCO26_1813, BCO26_RS09265, GI:503625689, WP_013859765.1	Bacillus_coagulans_2-6.RAST (77415/17/1)	gene	Oxidoreductase, short-chain dehydrogenase/reductase family
BCO26_RS09270	BCO26_1814, BCO26_RS09270, GI:503625690, WP_013859766.1	Bacillus_coagulans_2-6.RAST (77415/17/1)	gene	Replication-associated recombination protein RarA
BCO26_RS09275	BCO26_1815, BCO26_RS09275, GI:516122053, WP_017552633.1	Bacillus_coagulans_2-6.RAST (77415/17/1)	gene	HesA/MoeB/ThiF family protein
BCO26_RS09280	BCO26_1816, BCO26_RS09280, GI:503625692, WP_013859768.1	Bacillus_coagulans_2-6.RAST (77415/17/1)	gene	Bile acid sodium symporter
BCO26_RS09285	6.1.1.12, BCO26_1817, BCO26_RS09285, GI:737190508, WP_035176162.1, aspS	Bacillus_coagulans_2-6.RAST (77415/17/1)	gene	Aspartyl-tRNA synthetase (EC 6.1.1.12)
BCO26_RS09290	BCO26_1818, BCO26_RS09290, GI:503625694, WP_013859770.1	Bacillus_coagulans_2-6.RAST (77415/17/1)	gene	Histidyl-tRNA synthetase (EC 6.1.1.21)
BCO26_RS09295	BCO26_1820, BCO26_RS09295, GI:754207254, WP_041819181.1	Bacillus_coagulans_2-6.RAST (77415/17/1)	gene	N-acetylmuramoyl-L-alanine amidase (EC 3.5.1.28)
BCO26_RS09300	BCO26_RS09300, GI:754207255, WP_041819182.1	Bacillus_coagulans_2-6.RAST (77415/17/1)	gene	Uncharacterized MFS-type transporter
BCO26_RS09305	BCO26_1823, BCO26_RS09305, GI:503625699, WP_013859775.1	Bacillus_coagulans_2-6.RAST (77415/17/1)	gene	Multidrug resistance protein [function not yet clear]
BCO26_RS09310	BCO26_1824, BCO26_RS09310, GI:503625700, WP_013859776.1	Bacillus_coagulans_2-6.RAST (77415/17/1)	gene	hypothetical protein
BCO26_RS09315	BCO26_1825, BCO26_RS09315, GI:503625701, WP_013859777.1	Bacillus_coagulans_2-6.RAST (77415/17/1)	gene	D-aminoacyl-tRNA deacylase (EC 3.1.1.96)
BCO26_RS09320	BCO26_1826, BCO26_RS09320, GI:754207257, WP_041819184.1	Bacillus_coagulans_2-6.RAST (77415/17/1)	gene	Guanosine-3',5'-bis(diphosphate) 3'-pyrophosphohydrolase (EC 3.1.7.2) / GTP pyrophosphokinase (EC 2.7.6.5), (p)ppGpp synthetase II
BCO26_RS09325	BCO26_1828, BCO26_RS09325, GI:503625704, WP_013859780.1	Bacillus_coagulans_2-6.RAST (77415/17/1)	gene	Adenine phosphoribosyltransferase (EC 2.4.2.7)
BCO26_RS09330	BCO26_1829, BCO26_RS09330, GI:503625705, WP_013859781.1	Bacillus_coagulans_2-6.RAST (77415/17/1)	gene	Single-stranded-DNA-specific exonuclease RecJ
BCO26_RS09340	BCO26_1831, BCO26_RS09340, GI:516122067, WP_017552647.1	Bacillus_coagulans_2-6.RAST (77415/17/1)	gene	FIG01227478: hypothetical protein
BCO26_RS09345	BCO26_1832, BCO26_RS09345, GI:754207259, WP_041819186.1	Bacillus_coagulans_2-6.RAST (77415/17/1)	gene	Stage V sporulation protein B
BCO26_RS09350	BCO26_1833, BCO26_RS09350, GI:754207261, WP_041819188.1	Bacillus_coagulans_2-6.RAST (77415/17/1)	gene	UPF0702 transmembrane protein YrbG
BCO26_RS09355	BCO26_1834, BCO26_RS09355, GI:503625710, WP_013859786.1	Bacillus_coagulans_2-6.RAST (77415/17/1)	gene	FIG01228422: hypothetical protein
BCO26_RS09360	BCO26_1835, BCO26_RS09360, GI:503625711, WP_013859787.1	Bacillus_coagulans_2-6.RAST (77415/17/1)	gene	Protein translocase subunit YajC
BCO26_RS09370	BCO26_1837, BCO26_RS09370, GI:503625713, WP_013859789.1	Bacillus_coagulans_2-6.RAST (77415/17/1)	gene	S-adenosylmethionine:tRNA ribosyltransferase-isomerase (EC 2.4.99.17)
BCO26_RS09375	BCO26_1838, BCO26_RS09375, GI:503625714, WP_013859790.1	Bacillus_coagulans_2-6.RAST (77415/17/1)	gene	Uncharacterized membrane-anchored protein Rmet_0180
BCO26_RS09380	BCO26_1839, BCO26_RS09380, GI:503625715, WP_013859791.1	Bacillus_coagulans_2-6.RAST (77415/17/1)	gene	Holliday junction ATP-dependent DNA helicase RuvB (EC 3.6.4.12)
BCO26_RS09385	BCO26_1840, BCO26_RS09385, GI:503625716, WP_013859792.1	Bacillus_coagulans_2-6.RAST (77415/17/1)	gene	Holliday junction ATP-dependent DNA helicase RuvA (EC 3.6.4.12)
BCO26_RS09395	BCO26_1841, BCO26_RS09395, GI:503625717, WP_013859793.1	Bacillus_coagulans_2-6.RAST (77415/17/1)	gene	Probable transcriptional regulatory protein YebC
BCO26_RS09405	BCO26_1843, BCO26_RS09405, GI:754207266, WP_041819193.1	Bacillus_coagulans_2-6.RAST (77415/17/1)	gene	SpoIVD-associated factor SafA
BCO26_RS09410	BCO26_1844, BCO26_RS09410, GI:656145813, WP_029141938.1	Bacillus_coagulans_2-6.RAST (77415/17/1)	gene	Transcriptional repressor for NAD biosynthesis in gram-positives
BCO26_RS09420	BCO26_1846, BCO26_RS09420, GI:503625722, WP_013859798.1	Bacillus_coagulans_2-6.RAST (77415/17/1)	gene	ACT domain-containing protein
BCO26_RS09425	BCO26_1847, BCO26_RS09425, GI:503625723, WP_013859799.1	Bacillus_coagulans_2-6.RAST (77415/17/1)	gene	GTP-binding protein Obg
BCO26_RS09430	BCO26_1848, BCO26_RS09430, GI:503625724, WP_013859800.1	Bacillus_coagulans_2-6.RAST (77415/17/1)	gene	Sporulation initiation phosphotransferase B (Spo0B)
BCO26_RS09435	BCO26_1849, BCO26_RS09435, GI:503625725, WP_013859801.1	Bacillus_coagulans_2-6.RAST (77415/17/1)	gene	LSU ribosomal protein L27p
BCO26_RS09440	BCO26_1850, BCO26_RS09440, GI:503625726, WP_013859802.1	Bacillus_coagulans_2-6.RAST (77415/17/1)	gene	FIG139598: Potential ribosomal protein
BCO26_RS09445	BCO26_1851, BCO26_RS09445, GI:503625727, WP_013859803.1	Bacillus_coagulans_2-6.RAST (77415/17/1)	gene	LSU ribosomal protein L21p
BCO26_RS09450	BCO26_1852, BCO26_RS09450, GI:503625728, WP_013859804.1	Bacillus_coagulans_2-6.RAST (77415/17/1)	gene	Ribonuclease G
BCO26_RS09455	BCO26_1853, BCO26_RS09455, GI:503625729, WP_013859805.1	Bacillus_coagulans_2-6.RAST (77415/17/1)	gene	Stage IV sporulation pro-sigma-K processing enzyme (SpoIVFB)
BCO26_RS00125	BCO26_0021, BCO26_RS00125, GI:516123404, WP_017553984.1	Bacillus_coagulans_2-6.RAST (77415/17/1)	gene	16S rRNA (cytidine(1402)-2'-O)-methyltransferase (EC 2.1.1.198)
BCO26_RS09460	BCO26_1854, BCO26_RS09460, GI:503625730, WP_013859806.1	Bacillus_coagulans_2-6.RAST (77415/17/1)	gene	Stage IV sporulation protein FA (SpoIVFA)
BCO26_RS09465	BCO26_1855, BCO26_RS09465, GI:503625731, WP_013859807.1	Bacillus_coagulans_2-6.RAST (77415/17/1)	gene	Septum site-determining protein MinD
BCO26_RS09470	BCO26_1856, BCO26_RS09470, GI:503625732, WP_013859808.1, minC	Bacillus_coagulans_2-6.RAST (77415/17/1)	gene	Septum site-determining protein MinC
BCO26_RS09475	BCO26_RS09475, GI:754207269, WP_041819195.1	Bacillus_coagulans_2-6.RAST (77415/17/1)	gene	Rod shape-determining protein MreD
BCO26_RS09480	BCO26_1858, BCO26_RS09480, GI:503625734, WP_013859810.1	Bacillus_coagulans_2-6.RAST (77415/17/1)	gene	Rod shape-determining protein MreC
BCO26_RS09490	BCO26_1860, BCO26_RS09490, GI:737203249, WP_035188434.1	Bacillus_coagulans_2-6.RAST (77415/17/1)	gene	UPF0758 family protein
BCO26_RS09505	BCO26_1862, BCO26_RS09505, GI:503625737, WP_013859813.1	Bacillus_coagulans_2-6.RAST (77415/17/1)	gene	hypothetical protein
BCO26_RS09510	BCO26_1863, BCO26_RS09510, GI:503625738, WP_013859814.1	Bacillus_coagulans_2-6.RAST (77415/17/1)	gene	Leader peptidase (Prepilin peptidase) (EC 3.4.23.43) / N-methyltransferase (EC 2.1.1.-)
BCO26_RS09515	BCO26_1864, BCO26_RS09515, GI:503625739, WP_013859815.1	Bacillus_coagulans_2-6.RAST (77415/17/1)	gene	Type IV pilus biogenesis protein PilO
BCO26_RS09520	BCO26_1865, BCO26_RS09520, GI:503625740, WP_013859816.1	Bacillus_coagulans_2-6.RAST (77415/17/1)	gene	hypothetical protein
BCO26_RS09525	BCO26_1866, BCO26_RS09525, GI:754207274, WP_041819199.1	Bacillus_coagulans_2-6.RAST (77415/17/1)	gene	Type IV pilus biogenesis protein PilM
BCO26_RS09530	BCO26_1867, BCO26_RS09530, GI:503625742, WP_013859818.1	Bacillus_coagulans_2-6.RAST (77415/17/1)	gene	hypothetical protein
BCO26_RS09535	BCO26_1868, BCO26_RS09535, GI:503625743, WP_013859819.1	Bacillus_coagulans_2-6.RAST (77415/17/1)	gene	Type IV fimbrial assembly protein PilC
BCO26_RS09540	BCO26_1869, BCO26_RS09540, GI:503625744, WP_013859820.1	Bacillus_coagulans_2-6.RAST (77415/17/1)	gene	Twitching motility protein PilT
BCO26_RS09545	BCO26_1870, BCO26_RS09545, GI:503625745, WP_013859821.1	Bacillus_coagulans_2-6.RAST (77415/17/1)	gene	Type IV fimbrial assembly, ATPase PilB
BCO26_RS09550	BCO26_1871, BCO26_RS09550, GI:754207277, WP_041819202.1	Bacillus_coagulans_2-6.RAST (77415/17/1)	gene	FIG01231296: hypothetical protein
BCO26_RS09555	BCO26_1872, BCO26_RS09555, GI:503625747, WP_013859823.1	Bacillus_coagulans_2-6.RAST (77415/17/1)	gene	FIG01233301: hypothetical protein
BCO26_RS09560	BCO26_1873, BCO26_RS09560, GI:503625748, WP_013859824.1	Bacillus_coagulans_2-6.RAST (77415/17/1)	gene	FIG01238814: hypothetical protein
BCO26_RS09565	BCO26_1874, BCO26_RS09565, GI:754207857, WP_041819687.1	Bacillus_coagulans_2-6.RAST (77415/17/1)	gene	hypothetical protein
BCO26_RS09570	BCO26_1875, BCO26_RS09570, GI:503625750, WP_013859826.1	Bacillus_coagulans_2-6.RAST (77415/17/1)	gene	hypothetical protein
BCO26_RS09580	BCO26_1877, BCO26_RS09580, GI:503625752, WP_013859828.1	Bacillus_coagulans_2-6.RAST (77415/17/1)	gene	Dihydrofolate synthase (EC 6.3.2.12) @ Folylpolyglutamate synthase (EC 6.3.2.17)
BCO26_RS09585	BCO26_1878, BCO26_RS09585, GI:503625753, WP_013859829.1, valS	Bacillus_coagulans_2-6.RAST (77415/17/1)	gene	Valyl-tRNA synthetase (EC 6.1.1.9)
BCO26_RS09590	BCO26_1879, BCO26_RS09590, GI:516123211, WP_017553791.1	Bacillus_coagulans_2-6.RAST (77415/17/1)	gene	FIG01226092: hypothetical protein
BCO26_RS09595	BCO26_1880, BCO26_RS09595, GI:518550671, WP_019720878.1	Bacillus_coagulans_2-6.RAST (77415/17/1)	gene	CotS-related protein
BCO26_RS09600	BCO26_1881, BCO26_RS09600, GI:503625756, WP_013859832.1	Bacillus_coagulans_2-6.RAST (77415/17/1)	gene	Stage VI sporulation protein D
BCO26_RS09610	BCO26_1882, BCO26_RS09610, GI:503625757, WP_013859833.1	Bacillus_coagulans_2-6.RAST (77415/17/1)	gene	Glutamate-1-semialdehyde 2,1-aminomutase (EC 5.4.3.8)
BCO26_RS09615	BCO26_1883, BCO26_RS09615, GI:503625758, WP_013859834.1	Bacillus_coagulans_2-6.RAST (77415/17/1)	gene	Porphobilinogen synthase (EC 4.2.1.24)
BCO26_RS09620	BCO26_1884, BCO26_RS09620, GI:503625759, WP_013859835.1	Bacillus_coagulans_2-6.RAST (77415/17/1)	gene	Uroporphyrinogen-III synthase (EC 4.2.1.75)
BCO26_RS09625	BCO26_1885, BCO26_RS09625, GI:503625760, WP_013859836.1	Bacillus_coagulans_2-6.RAST (77415/17/1)	gene	Porphobilinogen deaminase (EC 2.5.1.61)
BCO26_RS09630	BCO26_1886, BCO26_RS09630, GI:503625761, WP_013859837.1	Bacillus_coagulans_2-6.RAST (77415/17/1)	gene	HemX protein, negative effector of steady-state concentration of glutamyl-tRNA reductase
BCO26_RS09635	BCO26_1887, BCO26_RS09635, GI:503625762, WP_013859838.1	Bacillus_coagulans_2-6.RAST (77415/17/1)	gene	Glutamyl-tRNA reductase (EC 1.2.1.70)
BCO26_RS09640	BCO26_1888, BCO26_RS09640, GI:503625763, WP_013859839.1	Bacillus_coagulans_2-6.RAST (77415/17/1)	gene	FIG00673500: hypothetical protein
BCO26_RS09650	BCO26_1889, BCO26_RS09650, GI:503625764, WP_013859840.1, engB, yihA, ysxC	Bacillus_coagulans_2-6.RAST (77415/17/1)	gene	GTP-binding protein EngB
BCO26_RS09655	BCO26_1890, BCO26_RS09655, GI:754207288, WP_041819211.1	Bacillus_coagulans_2-6.RAST (77415/17/1)	gene	ATP-dependent protease La (EC 3.4.21.53) Type I
BCO26_RS09660	BCO26_1891, BCO26_RS09660, GI:503625766, WP_013859842.1	Bacillus_coagulans_2-6.RAST (77415/17/1)	gene	ATP-dependent protease La (EC 3.4.21.53) LonB Type I
BCO26_RS09665	BCO26_1892, BCO26_RS09665, GI:503625767, WP_013859843.1	Bacillus_coagulans_2-6.RAST (77415/17/1)	gene	ATP-dependent Clp protease ATP-binding subunit ClpX
BCO26_RS09670	BCO26_1893, BCO26_RS09670, GI:503625768, WP_013859844.1, tig	Bacillus_coagulans_2-6.RAST (77415/17/1)	gene	Cell division trigger factor (EC 5.2.1.8)
BCO26_RS09675	BCO26_1894, BCO26_RS09675, GI:503625769, WP_013859845.1	Bacillus_coagulans_2-6.RAST (77415/17/1)	gene	TPR repeat protein
BCO26_RS09680	BCO26_1895, BCO26_RS09680, GI:503625770, WP_013859846.1	Bacillus_coagulans_2-6.RAST (77415/17/1)	gene	hypothetical protein
BCO26_RS09685	BCO26_1896, BCO26_RS09685, GI:503625771, WP_013859847.1	Bacillus_coagulans_2-6.RAST (77415/17/1)	gene	hypothetical protein
BCO26_RS09695	BCO26_1897, BCO26_RS09695, GI:503625772, WP_013859848.1	Bacillus_coagulans_2-6.RAST (77415/17/1)	gene	FIG009886: phosphoesterase
BCO26_RS09700	BCO26_1898, BCO26_RS09700, GI:503625773, WP_013859849.1	Bacillus_coagulans_2-6.RAST (77415/17/1)	gene	Nucleoside 5-triphosphatase RdgB (dHAPTP, dITP, XTP-specific) (EC 3.6.1.66)
BCO26_RS09705	BCO26_1899, BCO26_RS09705, GI:503625774, WP_013859850.1	Bacillus_coagulans_2-6.RAST (77415/17/1)	gene	Germination (Cortex hydrolysis) and sporulation protein GerM
BCO26_RS09735	BCO26_1904, BCO26_RS09735, GI:908639541, WP_049783562.1	Bacillus_coagulans_2-6.RAST (77415/17/1)	gene	Glutamate racemase (EC 5.1.1.3)
BCO26_RS09740	BCO26_1905, BCO26_RS09740, GI:503625780, WP_013859856.1	Bacillus_coagulans_2-6.RAST (77415/17/1)	gene	Uncharacterized transcriptional regulator YsmB, MarR family
BCO26_RS09775	BCO26_RS09775, GI:503863822, WP_014097816.1	Bacillus_coagulans_2-6.RAST (77415/17/1)	gene	Major transcriptional regulator of spore coat formation GerE
BCO26_RS09785	BCO26_1909, BCO26_RS09785, GI:908639516, WP_049783537.1	Bacillus_coagulans_2-6.RAST (77415/17/1)	gene	4-hydroxybenzoyl-CoA thioesterase
BCO26_RS09790	BCO26_1910, BCO26_RS09790, GI:503625785, WP_013859861.1, sdhB	Bacillus_coagulans_2-6.RAST (77415/17/1)	gene	Succinate dehydrogenase iron-sulfur protein (EC 1.3.5.1)
BCO26_RS09795	1.3.99.1, BCO26_1911, BCO26_RS09795, GI:516123241, WP_017553821.1, sdhA	Bacillus_coagulans_2-6.RAST (77415/17/1)	gene	Succinate dehydrogenase flavoprotein subunit (EC 1.3.5.1)
BCO26_RS09800	BCO26_RS09800, GI:516123242, WP_017553822.1	Bacillus_coagulans_2-6.RAST (77415/17/1)	gene	Succinate dehydrogenase cytochrome b558 subunit
BCO26_RS09805	BCO26_1914, BCO26_RS09805, GI:503625789, WP_013859865.1	Bacillus_coagulans_2-6.RAST (77415/17/1)	gene	Uncharacterized protein YslB
BCO26_RS09810	BCO26_1915, BCO26_RS09810, GI:503625790, WP_013859866.1	Bacillus_coagulans_2-6.RAST (77415/17/1)	gene	Aspartokinase (EC 2.7.2.4)
BCO26_RS09815	BCO26_1917, BCO26_RS09815, GI:503625792, WP_013859868.1	Bacillus_coagulans_2-6.RAST (77415/17/1)	gene	Excinuclease ABC subunit C
BCO26_RS09820	BCO26_1918, BCO26_RS09820, GI:503625793, WP_013859869.1	Bacillus_coagulans_2-6.RAST (77415/17/1)	gene	Thioredoxin
BCO26_RS09825	BCO26_1919, BCO26_RS09825, GI:503625794, WP_013859870.1	Bacillus_coagulans_2-6.RAST (77415/17/1)	gene	Electron transfer flavoprotein, alpha subunit
BCO26_RS09830	BCO26_1920, BCO26_RS09830, GI:503625795, WP_013859871.1	Bacillus_coagulans_2-6.RAST (77415/17/1)	gene	Electron transfer flavoprotein, beta subunit
BCO26_RS09835	BCO26_1921, BCO26_RS09835, GI:503625796, WP_013859872.1	Bacillus_coagulans_2-6.RAST (77415/17/1)	gene	Enoyl-CoA hydratase (EC 4.2.1.17)
BCO26_RS09840	BCO26_RS09840, GI:656146848, WP_029142316.1	Bacillus_coagulans_2-6.RAST (77415/17/1)	gene	Fatty acid metabolism regulator protein FadR, TetR family
BCO26_RS09845	BCO26_1923, BCO26_RS09845, GI:754207312, WP_041819231.1	Bacillus_coagulans_2-6.RAST (77415/17/1)	gene	Long-chain-fatty-acid--CoA ligase (EC 6.2.1.3)
BCO26_RS09850	BCO26_1924, BCO26_RS09850, GI:754207315, WP_041819234.1	Bacillus_coagulans_2-6.RAST (77415/17/1)	gene	Recombination inhibitory protein MutS2
BCO26_RS01100	BCO26_0191, BCO26_RS01100, GI:503624073, WP_013858149.1	Bacillus_coagulans_2-6.RAST (77415/17/1)	gene	Uncharacterized protein YkvR
BCO26_RS09865	BCO26_1927, BCO26_RS09865, GI:503625802, WP_013859878.1	Bacillus_coagulans_2-6.RAST (77415/17/1)	gene	Z-ring-associated protein
BCO26_RS09870	3.1.26.4, BCO26_1928, BCO26_RS09870, GI:754207319, WP_041819237.1	Bacillus_coagulans_2-6.RAST (77415/17/1)	gene	Ribonuclease HIII (EC 3.1.26.4)
BCO26_RS09880	BCO26_1930, BCO26_RS09880, GI:503625805, WP_013859881.1	Bacillus_coagulans_2-6.RAST (77415/17/1)	gene	Phenylalanyl-tRNA synthetase beta chain (EC 6.1.1.20)
BCO26_RS09885	BCO26_1931, BCO26_RS09885, GI:503625806, WP_013859882.1, pheS	Bacillus_coagulans_2-6.RAST (77415/17/1)	gene	Phenylalanyl-tRNA synthetase alpha chain (EC 6.1.1.20)
BCO26_RS09890	BCO26_1933, BCO26_RS09890, GI:656146830, WP_029142307.1	Bacillus_coagulans_2-6.RAST (77415/17/1)	gene	Uncharacterized RNA methyltransferase YsgA
BCO26_RS09895	BCO26_1934, BCO26_RS09895, GI:503625809, WP_013859885.1	Bacillus_coagulans_2-6.RAST (77415/17/1)	gene	Small, acid-soluble spore protein I
BCO26_RS09905	BCO26_1936, BCO26_RS09905, GI:754207323, WP_041819240.1	Bacillus_coagulans_2-6.RAST (77415/17/1)	gene	hypothetical protein
BCO26_RS01105	BCO26_0192, BCO26_RS01105, GI:754206564, WP_041818610.1	Bacillus_coagulans_2-6.RAST (77415/17/1)	gene	FIG01251525: hypothetical protein
BCO26_RS09915	BCO26_RS09915, GI:489448376, WP_003353767.1	Bacillus_coagulans_2-6.RAST (77415/17/1)	gene	Transcriptional regulator, PadR family
BCO26_RS09920	BCO26_1939, BCO26_RS09920, GI:503625814, WP_013859890.1	Bacillus_coagulans_2-6.RAST (77415/17/1)	gene	hypothetical protein
BCO26_RS09925	BCO26_1940, BCO26_RS09925, GI:503625815, WP_013859891.1	Bacillus_coagulans_2-6.RAST (77415/17/1)	gene	7-cyano-7-deazaguanine synthase (EC 6.3.4.20)
BCO26_RS09930	BCO26_1941, BCO26_RS09930, GI:503625816, WP_013859892.1	Bacillus_coagulans_2-6.RAST (77415/17/1)	gene	2-dehydropantoate 2-reductase (EC 1.1.1.169)
BCO26_RS09935	BCO26_1942, BCO26_RS09935, GI:503625817, WP_013859893.1	Bacillus_coagulans_2-6.RAST (77415/17/1)	gene	Chromate reductase (EC 1.6.5.2)
BCO26_RS09940	BCO26_1943, BCO26_RS09940, GI:503625818, WP_013859894.1	Bacillus_coagulans_2-6.RAST (77415/17/1)	gene	Glyoxalase family protein
BCO26_RS09945	BCO26_1944, BCO26_RS09945, GI:503625819, WP_013859895.1	Bacillus_coagulans_2-6.RAST (77415/17/1)	gene	Deoxyuridine 5'-triphosphate nucleotidohydrolase (EC 3.6.1.23)
BCO26_RS09950	BCO26_1946, BCO26_RS09950, GI:503625821, WP_013859897.1	Bacillus_coagulans_2-6.RAST (77415/17/1)	gene	LSU ribosomal protein L20p
BCO26_RS09955	BCO26_1947, BCO26_RS09955, GI:503625822, WP_013859898.1, rpmI	Bacillus_coagulans_2-6.RAST (77415/17/1)	gene	LSU ribosomal protein L35p
BCO26_RS09960	BCO26_1948, BCO26_RS09960, GI:516123267, WP_017553847.1	Bacillus_coagulans_2-6.RAST (77415/17/1)	gene	Translation initiation factor 3
BCO26_RS00130	BCO26_0022, BCO26_RS00130, GI:503623910, WP_013857986.1	Bacillus_coagulans_2-6.RAST (77415/17/1)	gene	Transition state regulatory protein AbrB
BCO26_RS09970	BCO26_1950, BCO26_RS09970, GI:503625825, WP_013859901.1	Bacillus_coagulans_2-6.RAST (77415/17/1)	gene	Threonyl-tRNA synthetase (EC 6.1.1.3)
BCO26_RS09975	BCO26_1951, BCO26_RS09975, GI:503625826, WP_013859902.1	Bacillus_coagulans_2-6.RAST (77415/17/1)	gene	Uncharacterized protein YtxC
BCO26_RS09980	BCO26_1952, BCO26_RS09980, GI:754207326, WP_041819243.1	Bacillus_coagulans_2-6.RAST (77415/17/1)	gene	Helicase loader DnaI
BCO26_RS09985	BCO26_1953, BCO26_RS09985, GI:516124146, WP_017554726.1	Bacillus_coagulans_2-6.RAST (77415/17/1)	gene	Helicase loader DnaB
BCO26_RS09990	BCO26_1954, BCO26_RS09990, GI:503625829, WP_013859905.1, nrdR	Bacillus_coagulans_2-6.RAST (77415/17/1)	gene	Ribonucleotide reductase transcriptional regulator NrdR
BCO26_RS10000	1.2.1.12, BCO26_1956, BCO26_RS10000, GI:754207329, WP_041819245.1	Bacillus_coagulans_2-6.RAST (77415/17/1)	gene	NAD-dependent glyceraldehyde-3-phosphate dehydrogenase (EC 1.2.1.12)
BCO26_RS10005	BCO26_1957, BCO26_RS10005, GI:503625832, WP_013859908.1	Bacillus_coagulans_2-6.RAST (77415/17/1)	gene	Dephospho-CoA kinase (EC 2.7.1.24)
BCO26_RS10010	BCO26_RS10010, GI:754207332, WP_041819248.1	Bacillus_coagulans_2-6.RAST (77415/17/1)	gene	Uncharacterized membrane protein YtaF
BCO26_RS10015	BCO26_1959, BCO26_RS10015, GI:503625834, WP_013859910.1	Bacillus_coagulans_2-6.RAST (77415/17/1)	gene	Formamidopyrimidine-DNA glycosylase (EC 3.2.2.23)
BCO26_RS10020	BCO26_1960, BCO26_RS10020, GI:503625835, WP_013859911.1	Bacillus_coagulans_2-6.RAST (77415/17/1)	gene	DNA polymerase I (EC 2.7.7.7)
BCO26_RS10025	BCO26_1962, BCO26_RS10025, GI:503625837, WP_013859913.1	Bacillus_coagulans_2-6.RAST (77415/17/1)	gene	Malate dehydrogenase (EC 1.1.1.37)
BCO26_RS10030	BCO26_1963, BCO26_RS10030, GI:503625838, WP_013859914.1	Bacillus_coagulans_2-6.RAST (77415/17/1)	gene	Isocitrate dehydrogenase [NADP] (EC 1.1.1.42)
BCO26_RS10035	BCO26_1964, BCO26_RS10035, GI:503625839, WP_013859915.1	Bacillus_coagulans_2-6.RAST (77415/17/1)	gene	Citrate synthase (si) (EC 2.3.3.1)
BCO26_RS10040	BCO26_1965, BCO26_RS10040, GI:503863756, WP_014097750.1	Bacillus_coagulans_2-6.RAST (77415/17/1)	gene	UPF0756 membrane protein YtwI
BCO26_RS10045	BCO26_1966, BCO26_RS10045, GI:503625841, WP_013859917.1	Bacillus_coagulans_2-6.RAST (77415/17/1)	gene	Sporulation integral membrane protein YtvI
BCO26_RS10050	BCO26_1967, BCO26_RS10050, GI:503625842, WP_013859918.1	Bacillus_coagulans_2-6.RAST (77415/17/1)	gene	Pyruvate kinase (EC 2.7.1.40) / Phosphohistidine swiveling domain
BCO26_RS10055	BCO26_1968, BCO26_RS10055, GI:503625843, WP_013859919.1	Bacillus_coagulans_2-6.RAST (77415/17/1)	gene	6-phosphofructokinase (EC 2.7.1.11)
BCO26_RS10060	BCO26_1969, BCO26_RS10060, GI:503625844, WP_013859920.1	Bacillus_coagulans_2-6.RAST (77415/17/1)	gene	Acetyl-coenzyme A carboxyl transferase alpha chain (EC 6.4.1.2)
BCO26_RS10070	BCO26_1971, BCO26_RS10070, GI:754207336, WP_041819251.1	Bacillus_coagulans_2-6.RAST (77415/17/1)	gene	NADP-dependent malic enzyme (EC 1.1.1.40)
BCO26_RS10080	BCO26_1973, BCO26_RS10080, GI:658518742, WP_029713756.1	Bacillus_coagulans_2-6.RAST (77415/17/1)	gene	FIG012070: hypothetical protein
BCO26_RS10085	BCO26_1974, BCO26_RS10085, GI:503625849, WP_013859925.1	Bacillus_coagulans_2-6.RAST (77415/17/1)	gene	FIG013210: hypothetical protein
BCO26_RS10090	BCO26_1975, BCO26_RS10090, GI:503625850, WP_013859926.1	Bacillus_coagulans_2-6.RAST (77415/17/1)	gene	3'-to-5' oligoribonuclease A, Bacillus type
BCO26_RS10095	BCO26_1976, BCO26_RS10095, GI:503625851, WP_013859927.1	Bacillus_coagulans_2-6.RAST (77415/17/1)	gene	hypothetical protein
BCO26_RS10100	BCO26_1977, BCO26_RS10100, GI:503625852, WP_013859928.1	Bacillus_coagulans_2-6.RAST (77415/17/1)	gene	Uncharacterized protein YtoI
BCO26_RS10105	BCO26_1978, BCO26_RS10105, GI:503625853, WP_013859929.1	Bacillus_coagulans_2-6.RAST (77415/17/1)	gene	FIG002379: metal-dependent hydrolase
BCO26_RS10110	BCO26_1979, BCO26_RS10110, GI:503625854, WP_013859930.1	Bacillus_coagulans_2-6.RAST (77415/17/1)	gene	Proline dipeptidase (EC 3.4.13.9)
BCO26_RS01125	BCO26_0196, BCO26_RS01125, GI:503624078, WP_013858154.1	Bacillus_coagulans_2-6.RAST (77415/17/1)	gene	Hydroxymethylglutaryl-CoA reductase (EC 1.1.1.34)
BCO26_RS10115	BCO26_1980, BCO26_RS10115, GI:503625855, WP_013859931.1	Bacillus_coagulans_2-6.RAST (77415/17/1)	gene	Alanine dehydrogenase (EC 1.4.1.1)
BCO26_RS10120	BCO26_1982, BCO26_RS10120, GI:503625857, WP_013859933.1	Bacillus_coagulans_2-6.RAST (77415/17/1)	gene	Universal stress protein family
BCO26_RS10125	BCO26_1983, BCO26_RS10125, GI:503625858, WP_013859934.1	Bacillus_coagulans_2-6.RAST (77415/17/1)	gene	Protein ecsC
BCO26_RS10130	BCO26_1984, BCO26_RS10130, GI:503625859, WP_013859935.1	Bacillus_coagulans_2-6.RAST (77415/17/1)	gene	Acetate kinase (EC 2.7.2.1)
BCO26_RS10135	BCO26_1986, BCO26_RS10135, GI:754207339, WP_041819254.1	Bacillus_coagulans_2-6.RAST (77415/17/1)	gene	Adenine-specific methyltransferase (EC 2.1.1.72)
BCO26_RS10140	BCO26_1987, BCO26_RS10140, GI:503625862, WP_013859938.1	Bacillus_coagulans_2-6.RAST (77415/17/1)	gene	Thiol peroxidase, Tpx-type (EC 1.11.1.15)
BCO26_RS10145	BCO26_1988, BCO26_RS10145, GI:503625863, WP_013859939.1	Bacillus_coagulans_2-6.RAST (77415/17/1)	gene	Spore protein GerW (YtfJ), not involved in spore germination
BCO26_RS10150	BCO26_1989, BCO26_RS10150, GI:754207862, WP_041819692.1	Bacillus_coagulans_2-6.RAST (77415/17/1)	gene	putative secreted protein
BCO26_RS10155	BCO26_RS10155, GI:754207342, WP_041819256.1	Bacillus_coagulans_2-6.RAST (77415/17/1)	gene	BH3197 unknown conserved protein
BCO26_RS10160	BCO26_1991, BCO26_RS10160, GI:503625866, WP_013859942.1	Bacillus_coagulans_2-6.RAST (77415/17/1)	gene	Protease IV
BCO26_RS01130	BCO26_0197, BCO26_RS01130, GI:503624079, WP_013858155.1	Bacillus_coagulans_2-6.RAST (77415/17/1)	gene	Hydroxymethylglutaryl-CoA synthase (EC 2.3.3.10)
BCO26_RS10165	BCO26_1992, BCO26_RS10165, GI:503625867, WP_013859943.1	Bacillus_coagulans_2-6.RAST (77415/17/1)	gene	Acyl-coenzyme A synthetases/AMP-(fatty) acid ligases, YtcI homolog
BCO26_RS10170	BCO26_1993, BCO26_RS10170, GI:503625868, WP_013859944.1	Bacillus_coagulans_2-6.RAST (77415/17/1)	gene	Small acid-soluble spore protein, alpha/beta family, SASP_1
BCO26_RS10175	BCO26_1994, BCO26_RS10175, GI:503625869, WP_013859945.1	Bacillus_coagulans_2-6.RAST (77415/17/1)	gene	tRNA 4-thiouridine synthase (EC 2.8.1.4)
BCO26_RS10180	BCO26_1995, BCO26_RS10180, GI:503625870, WP_013859946.1	Bacillus_coagulans_2-6.RAST (77415/17/1)	gene	Cysteine desulfurase (EC 2.8.1.7), associated with tRNA 4-thiouridine synthase
BCO26_RS10190	BCO26_1996, BCO26_RS10190, GI:503625871, WP_013859947.1	Bacillus_coagulans_2-6.RAST (77415/17/1)	gene	Septation ring formation regulator EzrA
BCO26_RS10195	BCO26_1997, BCO26_RS10195, GI:503625872, WP_013859948.1	Bacillus_coagulans_2-6.RAST (77415/17/1)	gene	Transcriptional regulator, AcrR family
BCO26_RS10200	BCO26_1998, BCO26_RS10200, GI:503625873, WP_013859949.1	Bacillus_coagulans_2-6.RAST (77415/17/1)	gene	Free methionine-(R)-sulfoxide reductase, contains GAF domain
BCO26_RS10205	BCO26_1999, BCO26_RS10205, GI:503625874, WP_013859950.1	Bacillus_coagulans_2-6.RAST (77415/17/1)	gene	GGDEF domain protein
BCO26_RS10210	BCO26_2000, BCO26_RS10210, GI:503625875, WP_013859951.1	Bacillus_coagulans_2-6.RAST (77415/17/1)	gene	SSU ribosomal protein S4p (S9e) @ SSU ribosomal protein S4p (S9e), zinc-independent
BCO26_RS01135	BCO26_0198, BCO26_RS01135, GI:503624080, WP_013858156.1	Bacillus_coagulans_2-6.RAST (77415/17/1)	gene	3-ketoacyl-CoA thiolase (EC 2.3.1.16) @ Acetyl-CoA acetyltransferase (EC 2.3.1.9)
BCO26_RS10225	BCO26_2003, BCO26_RS10225, GI:503625878, WP_013859954.1	Bacillus_coagulans_2-6.RAST (77415/17/1)	gene	Proline dehydrogenase (EC 1.5.5.2)
BCO26_RS10230	BCO26_2004, BCO26_RS10230, GI:503625879, WP_013859955.1	Bacillus_coagulans_2-6.RAST (77415/17/1)	gene	Delta-1-pyrroline-5-carboxylate dehydrogenase (EC 1.2.1.88)
BCO26_RS10235	BCO26_2005, BCO26_RS10235, GI:503625880, WP_013859956.1	Bacillus_coagulans_2-6.RAST (77415/17/1)	gene	Transcriptional regulator
BCO26_RS10240	BCO26_2006, BCO26_RS10240, GI:503625881, WP_013859957.1	Bacillus_coagulans_2-6.RAST (77415/17/1)	gene	Tyrosyl-tRNA synthetase (EC 6.1.1.1)
BCO26_RS10250	BCO26_2007, BCO26_RS10250, GI:503625882, WP_013859958.1	Bacillus_coagulans_2-6.RAST (77415/17/1)	gene	Sulfur carrier protein FdhD
BCO26_RS10255	BCO26_2008, BCO26_RS10255, GI:503625883, WP_013859959.1	Bacillus_coagulans_2-6.RAST (77415/17/1)	gene	Putative formate dehydrogenase YrhE
BCO26_RS10260	BCO26_2009, BCO26_RS10260, GI:503625884, WP_013859960.1	Bacillus_coagulans_2-6.RAST (77415/17/1)	gene	Hypothetical protein YrhD
BCO26_RS01140	BCO26_0199, BCO26_RS01140, GI:503624081, WP_013858157.1	Bacillus_coagulans_2-6.RAST (77415/17/1)	gene	hypothetical protein
BCO26_RS10265	BCO26_2010, BCO26_RS10265, GI:503625885, WP_013859961.1	Bacillus_coagulans_2-6.RAST (77415/17/1)	gene	Molybdopterin-synthase adenylyltransferase (EC 2.7.7.80)
BCO26_RS10275	BCO26_2012, BCO26_RS10275, GI:503625887, WP_013859963.1	Bacillus_coagulans_2-6.RAST (77415/17/1)	gene	Molybdopterin synthase sulfur carrier subunit
BCO26_RS10280	BCO26_2013, BCO26_RS10280, GI:503625888, WP_013859964.1	Bacillus_coagulans_2-6.RAST (77415/17/1)	gene	Molybdopterin synthase catalytic subunit MoaE (EC 2.8.1.12)
BCO26_RS10290	BCO26_2015, BCO26_RS10290, GI:737335531, WP_035317842.1	Bacillus_coagulans_2-6.RAST (77415/17/1)	gene	Molybdopterin molybdenumtransferase (EC 2.10.1.1)
BCO26_RS10295	BCO26_2016, BCO26_RS10295, GI:503625891, WP_013859967.1	Bacillus_coagulans_2-6.RAST (77415/17/1)	gene	Molybdenum cofactor guanylyltransferase (EC 2.7.7.77)
BCO26_RS10300	BCO26_2017, BCO26_RS10300, GI:503625892, WP_013859968.1	Bacillus_coagulans_2-6.RAST (77415/17/1)	gene	Molybdenum cofactor biosynthesis protein MoaB
BCO26_RS10305	BCO26_RS10305, GI:737335529, WP_035317840.1	Bacillus_coagulans_2-6.RAST (77415/17/1)	gene	GTP 3',8-cyclase (EC 4.1.99.22)
BCO26_RS01150	1.1.1.79, 1.1.1.81, BCO26_RS01150, GI:754206573, WP_041818617.1	Bacillus_coagulans_2-6.RAST (77415/17/1)	gene	D-3-phosphoglycerate dehydrogenase (EC 1.1.1.95)
BCO26_RS10320	BCO26_2021, BCO26_RS10320, GI:503625896, WP_013859972.1	Bacillus_coagulans_2-6.RAST (77415/17/1)	gene	Molybdenum ABC transporter, substrate-binding protein ModA
BCO26_RS10325	BCO26_2022, BCO26_RS10325, GI:503625897, WP_013859973.1	Bacillus_coagulans_2-6.RAST (77415/17/1)	gene	Acetyl-CoA synthetase (EC 6.2.1.1)
BCO26_RS10330	BCO26_2023, BCO26_RS10330, GI:503625898, WP_013859974.1	Bacillus_coagulans_2-6.RAST (77415/17/1)	gene	Acetyltransferase AcuA, acetyl-CoA synthetase inhibitor
BCO26_RS10335	BCO26_2024, BCO26_RS10335, GI:503625899, WP_013859975.1	Bacillus_coagulans_2-6.RAST (77415/17/1)	gene	hypothetical protein
BCO26_RS10340	BCO26_2025, BCO26_RS10340, GI:503625900, WP_013859976.1	Bacillus_coagulans_2-6.RAST (77415/17/1)	gene	NAD-independent protein deacetylase AcuC
BCO26_RS10345	BCO26_2026, BCO26_RS10345, GI:503625901, WP_013859977.1	Bacillus_coagulans_2-6.RAST (77415/17/1)	gene	Catabolite control protein A
BCO26_RS10350	BCO26_2027, BCO26_RS10350, GI:754207347, WP_041819260.1	Bacillus_coagulans_2-6.RAST (77415/17/1)	gene	Chorismate mutase I (EC 5.4.99.5) / 2-keto-3-deoxy-D-arabino-heptulosonate-7-phosphate synthase I beta (EC 2.5.1.54)
BCO26_RS10355	BCO26_2028, BCO26_RS10355, GI:503625903, WP_013859979.1	Bacillus_coagulans_2-6.RAST (77415/17/1)	gene	hypothetical protein
BCO26_RS10360	BCO26_2029, BCO26_RS10360, GI:503625904, WP_013859980.1	Bacillus_coagulans_2-6.RAST (77415/17/1)	gene	Pyridoxamine 5'-phosphate oxidase (EC 1.4.3.5)
BCO26_RS10365	BCO26_2031, BCO26_RS10365, GI:503625906, WP_013859982.1	Bacillus_coagulans_2-6.RAST (77415/17/1)	gene	UDP-N-acetylmuramate--L-alanine ligase (EC 6.3.2.8)
BCO26_RS10370	BCO26_2032, BCO26_RS10370, GI:503625907, WP_013859983.1	Bacillus_coagulans_2-6.RAST (77415/17/1)	gene	DNA translocase FtsK
BCO26_RS10380	BCO26_2034, BCO26_RS10380, GI:503625909, WP_013859985.1	Bacillus_coagulans_2-6.RAST (77415/17/1)	gene	Phenylalanyl-tRNA synthetase domain protein (Bsu YtpR)
BCO26_RS10385	BCO26_2035, BCO26_RS10385, GI:503625910, WP_013859986.1	Bacillus_coagulans_2-6.RAST (77415/17/1)	gene	FIG002434: Uncharacterized protein YtpQ
BCO26_RS10390	BCO26_2036, BCO26_RS10390, GI:503625911, WP_013859987.1	Bacillus_coagulans_2-6.RAST (77415/17/1)	gene	FIG009688: Thioredoxin
BCO26_RS10395	BCO26_2038, BCO26_RS10395, GI:503625913, WP_013859989.1	Bacillus_coagulans_2-6.RAST (77415/17/1)	gene	Serine phosphatase RsbU, regulator of sigma subunit
BCO26_RS10410	BCO26_2041, BCO26_RS10410, GI:503625916, WP_013859992.1	Bacillus_coagulans_2-6.RAST (77415/17/1)	gene	FIG00774243: hypothetical protein
BCO26_RS10415	BCO26_2042, BCO26_RS10415, GI:503625917, WP_013859993.1	Bacillus_coagulans_2-6.RAST (77415/17/1)	gene	Quorum-quenching lactonase YtnP
BCO26_RS10425	BCO26_2043, BCO26_RS10425, GI:503625918, WP_013859994.1	Bacillus_coagulans_2-6.RAST (77415/17/1)	gene	tRNA (guanine(46)-N(7))-methyltransferase (EC 2.1.1.33)
BCO26_RS10430	BCO26_2044, BCO26_RS10430, GI:503625919, WP_013859995.1	Bacillus_coagulans_2-6.RAST (77415/17/1)	gene	FIG01225636: hypothetical protein
BCO26_RS10435	BCO26_2045, BCO26_RS10435, GI:503625920, WP_013859996.1	Bacillus_coagulans_2-6.RAST (77415/17/1)	gene	Putative phosphotransferase YtmP
BCO26_RS10445	BCO26_2048, BCO26_RS10445, GI:754207358, WP_041819270.1	Bacillus_coagulans_2-6.RAST (77415/17/1)	gene	FIG01233842: hypothetical protein
BCO26_RS10450	BCO26_2049, BCO26_RS10450, GI:503625924, WP_013860000.1	Bacillus_coagulans_2-6.RAST (77415/17/1)	gene	2'-5' RNA ligase
BCO26_RS10455	BCO26_2051, BCO26_RS10455, GI:503625926, WP_013860002.1	Bacillus_coagulans_2-6.RAST (77415/17/1)	gene	D-alanine aminotransferase (EC 2.6.1.21)
BCO26_RS10460	BCO26_2052, BCO26_RS10460, GI:503625927, WP_013860003.1	Bacillus_coagulans_2-6.RAST (77415/17/1)	gene	Putative Xaa-His dipeptidase
BCO26_RS00015	BCO26_0003, BCO26_RS00015, GI:503623892, WP_013857968.1	Bacillus_coagulans_2-6.RAST (77415/17/1)	gene	Uncharacterized S4 RNA-binding-domain protein YbcJ
BCO26_RS00135	BCO26_0023, BCO26_RS00135, GI:503623911, WP_013857987.1	Bacillus_coagulans_2-6.RAST (77415/17/1)	gene	Methionyl-tRNA synthetase (EC 6.1.1.10)
BCO26_RS10470	BCO26_RS10470, GI:516121938, WP_017552518.1	Bacillus_coagulans_2-6.RAST (77415/17/1)	gene	Transcriptional regulator, DeoR family
BCO26_RS10475	BCO26_2053, BCO26_RS10475, GI:503625928, WP_013860004.1	Bacillus_coagulans_2-6.RAST (77415/17/1)	gene	Probable cell division protein YtgP
BCO26_RS10480	BCO26_2054, BCO26_RS10480, GI:503625929, WP_013860005.1	Bacillus_coagulans_2-6.RAST (77415/17/1)	gene	Protein cse60
BCO26_RS10495	BCO26_2057, BCO26_RS10495, GI:503625931, WP_013860007.1	Bacillus_coagulans_2-6.RAST (77415/17/1)	gene	Leucyl-tRNA synthetase (EC 6.1.1.4)
BCO26_RS10500	BCO26_2058, BCO26_RS10500, GI:503625933, WP_013860009.1	Bacillus_coagulans_2-6.RAST (77415/17/1)	gene	Uncharacterized MFS-type transporter YttB
BCO26_RS10505	BCO26_2060, BCO26_RS10505, GI:503625935, WP_013860011.1	Bacillus_coagulans_2-6.RAST (77415/17/1)	gene	FIG01225931: hypothetical protein
BCO26_RS10515	BCO26_2061, BCO26_RS10515, GI:503625936, WP_013860012.1	Bacillus_coagulans_2-6.RAST (77415/17/1)	gene	Putative rRNA methylase YtqB
BCO26_RS01170	BCO26_0205, BCO26_RS01170, GI:503624087, WP_013858163.1	Bacillus_coagulans_2-6.RAST (77415/17/1)	gene	PTS system, trehalose-specific IIB component (EC 2.7.1.201) / PTS system, trehalose-specific IIC component
BCO26_RS10520	BCO26_2062, BCO26_RS10520, GI:656144623, WP_029141463.1	Bacillus_coagulans_2-6.RAST (77415/17/1)	gene	Tetraprenyl-beta-curcumene synthase (EC 4.2.3.130)
BCO26_RS10525	BCO26_2063, BCO26_RS10525, GI:503625938, WP_013860014.1	Bacillus_coagulans_2-6.RAST (77415/17/1)	gene	Lysophospholipase (EC 3.1.1.5),Monoglyceride lipase (EC 3.1.1.23)
BCO26_RS10530	BCO26_2064, BCO26_RS10530, GI:503625939, WP_013860015.1	Bacillus_coagulans_2-6.RAST (77415/17/1)	gene	Carbonic anhydrase, gamma class (EC 4.2.1.1)
BCO26_RS10535	BCO26_2065, BCO26_RS10535, GI:754207370, WP_041819281.1	Bacillus_coagulans_2-6.RAST (77415/17/1)	gene	Asparagine synthetase [glutamine-hydrolyzing] (EC 6.3.5.4) AsnB
BCO26_RS10540	BCO26_2066, BCO26_RS10540, GI:503625941, WP_013860017.1	Bacillus_coagulans_2-6.RAST (77415/17/1)	gene	S-adenosylmethionine synthetase (EC 2.5.1.6)
BCO26_RS10545	4.1.1.49, BCO26_2067, BCO26_RS10545, GI:754207867, WP_041819697.1	Bacillus_coagulans_2-6.RAST (77415/17/1)	gene	Phosphoenolpyruvate carboxykinase [ATP] (EC 4.1.1.49)
BCO26_RS10560	BCO26_2070, BCO26_RS10560, GI:503625945, WP_013860021.1	Bacillus_coagulans_2-6.RAST (77415/17/1)	gene	Dipeptidyl aminopeptidases/acylaminoacyl-peptidase
BCO26_RS10575	BCO26_2075, BCO26_RS10575, GI:754207377, WP_041819287.1	Bacillus_coagulans_2-6.RAST (77415/17/1)	gene	ABC transporter, substrate-binding protein (cluster 10, nitrate/sulfonate/bicarbonate)
BCO26_RS10580	BCO26_2076, BCO26_RS10580, GI:503625951, WP_013860027.1	Bacillus_coagulans_2-6.RAST (77415/17/1)	gene	Hydroxymethylpyrimidine ABC transporter, ATPase component
BCO26_RS10585	BCO26_2077, BCO26_RS10585, GI:503625952, WP_013860028.1	Bacillus_coagulans_2-6.RAST (77415/17/1)	gene	Hydroxymethylpyrimidine ABC transporter, transmembrane component
BCO26_RS10590	BCO26_2078, BCO26_RS10590, GI:754207869, WP_041819698.1	Bacillus_coagulans_2-6.RAST (77415/17/1)	gene	Low G+C gram positive nudix hydrolase YtkD (EC 3.6.-.-)
BCO26_RS10595	BCO26_2079, BCO26_RS10595, GI:503625954, WP_013860030.1	Bacillus_coagulans_2-6.RAST (77415/17/1)	gene	FIG01225899: hypothetical protein
BCO26_RS10600	BCO26_2080, BCO26_RS10600, GI:503625955, WP_013860031.1	Bacillus_coagulans_2-6.RAST (77415/17/1)	gene	DNA protection during starvation protein
BCO26_RS10605	BCO26_2081, BCO26_RS10605, GI:503625956, WP_013860032.1	Bacillus_coagulans_2-6.RAST (77415/17/1)	gene	Membrane protein insertion efficiency factor YidD
BCO26_RS10610	BCO26_2084, BCO26_RS10610, GI:754207380, WP_041819290.1	Bacillus_coagulans_2-6.RAST (77415/17/1)	gene	Zinc ABC transporter, substrate-binding protein ZnuA
BCO26_RS10620	BCO26_2087, BCO26_RS10620, GI:503625962, WP_013860038.1	Bacillus_coagulans_2-6.RAST (77415/17/1)	gene	O-succinylbenzoic acid--CoA ligase (EC 6.2.1.26)
BCO26_RS10625	BCO26_2088, BCO26_RS10625, GI:503625963, WP_013860039.1	Bacillus_coagulans_2-6.RAST (77415/17/1)	gene	Naphthoate synthase (EC 4.1.3.36)
BCO26_RS10630	BCO26_2089, BCO26_RS10630, GI:503625964, WP_013860040.1	Bacillus_coagulans_2-6.RAST (77415/17/1)	gene	2-succinyl-6-hydroxy-2,4-cyclohexadiene-1-carboxylate synthase (EC 4.2.99.20)
BCO26_RS10640	BCO26_2091, BCO26_RS10640, GI:503625966, WP_013860042.1	Bacillus_coagulans_2-6.RAST (77415/17/1)	gene	Isochorismate synthase (EC 5.4.4.2) @ Menaquinone-specific isochorismate synthase (EC 5.4.4.2)
BCO26_RS10645	BCO26_RS10645, GI:754207383, WP_041819292.1	Bacillus_coagulans_2-6.RAST (77415/17/1)	gene	1,4-dihydroxy-2-naphthoate polyprenyltransferase (EC 2.5.1.74)
BCO26_RS10785	BCO26_2097, BCO26_RS10785, GI:503625970, WP_013860046.1	Bacillus_coagulans_2-6.RAST (77415/17/1)	gene	Permease of the drug/metabolite transporter (DMT) superfamily
BCO26_RS10790	BCO26_2098, BCO26_RS10790, GI:503625971, WP_013860047.1	Bacillus_coagulans_2-6.RAST (77415/17/1)	gene	Mg(2+)-transport-ATPase-associated protein MgtC
BCO26_RS10795	BCO26_2099, BCO26_RS10795, GI:503625972, WP_013860048.1	Bacillus_coagulans_2-6.RAST (77415/17/1)	gene	Cation transporter
BCO26_RS10805	BCO26_2101, BCO26_RS10805, GI:503625974, WP_013860050.1	Bacillus_coagulans_2-6.RAST (77415/17/1)	gene	Lead, cadmium, zinc and mercury transporting ATPase (EC 3.6.3.3) (EC 3.6.3.5),Copper-translocating P-type ATPase (EC 3.6.3.4)
BCO26_RS10810	BCO26_2102, BCO26_RS10810, GI:503625975, WP_013860051.1	Bacillus_coagulans_2-6.RAST (77415/17/1)	gene	Copper(I) chaperone CopZ
BCO26_RS10815	BCO26_2103, BCO26_RS10815, GI:503625976, WP_013860052.1	Bacillus_coagulans_2-6.RAST (77415/17/1)	gene	Repressor CsoR of the copZA operon
BCO26_RS10825	BCO26_RS10825, GI:754207394, WP_041819301.1	Bacillus_coagulans_2-6.RAST (77415/17/1)	gene	FIG00530612: hypothetical protein
BCO26_RS10835	BCO26_2107, BCO26_RS10835, GI:503625980, WP_013860056.1	Bacillus_coagulans_2-6.RAST (77415/17/1)	gene	hypothetical protein
BCO26_RS10840	BCO26_2108, BCO26_RS10840, GI:503625981, WP_013860057.1	Bacillus_coagulans_2-6.RAST (77415/17/1)	gene	Uncharacterized symporter YhjB
BCO26_RS10885	BCO26_2118, BCO26_RS10885, GI:503625991, WP_013860067.1	Bacillus_coagulans_2-6.RAST (77415/17/1)	gene	hypothetical protein
BCO26_RS01195	BCO26_0209, BCO26_RS01195, GI:754206582, WP_041818623.1	Bacillus_coagulans_2-6.RAST (77415/17/1)	gene	Gluconokinase (EC 2.7.1.12)
BCO26_RS10890	BCO26_2119, BCO26_RS10890, GI:503625992, WP_013860068.1	Bacillus_coagulans_2-6.RAST (77415/17/1)	gene	Peptidoglycan N-acetylglucosamine deacetylase (EC 3.5.1.-)
BCO26_RS10910	BCO26_2123, BCO26_RS10910, GI:503625996, WP_013860072.1	Bacillus_coagulans_2-6.RAST (77415/17/1)	gene	Rhodanese-like domain protein
BCO26_RS10915	BCO26_RS10915, GI:516124257, WP_017554837.1	Bacillus_coagulans_2-6.RAST (77415/17/1)	gene	Uncharacterized protein YrkD
BCO26_RS10925	BCO26_2125, BCO26_RS10925, GI:503625998, WP_013860074.1	Bacillus_coagulans_2-6.RAST (77415/17/1)	gene	Phage-encoded chromosome degrading nuclease YokF
BCO26_RS10930	BCO26_2126, BCO26_RS10930, GI:908639542, WP_049783563.1	Bacillus_coagulans_2-6.RAST (77415/17/1)	gene	hypothetical protein
BCO26_RS10975	BCO26_2136, BCO26_RS10975, GI:503626009, WP_013860085.1	Bacillus_coagulans_2-6.RAST (77415/17/1)	gene	Oxidoreductase, short-chain dehydrogenase/reductase family
BCO26_RS10985	BCO26_RS10985, GI:516124222, WP_017554802.1	Bacillus_coagulans_2-6.RAST (77415/17/1)	gene	Uncharacterized membrane protein YuiD
BCO26_RS11025	BCO26_2145, BCO26_RS11025, GI:754207413, WP_041819318.1	Bacillus_coagulans_2-6.RAST (77415/17/1)	gene	Potassium voltage-gated channel subfamily KQT,possible potassium channel, VIC family
BCO26_RS11030	BCO26_2146, BCO26_RS11030, GI:503626019, WP_013860095.1	Bacillus_coagulans_2-6.RAST (77415/17/1)	gene	Glucose-6-phosphate isomerase (EC 5.3.1.9)
BCO26_RS11035	BCO26_2147, BCO26_RS11035, GI:503626020, WP_013860096.1	Bacillus_coagulans_2-6.RAST (77415/17/1)	gene	Uncharacterized membrane protein YuzA
BCO26_RS11040	BCO26_2148, BCO26_RS11040, GI:503626021, WP_013860097.1	Bacillus_coagulans_2-6.RAST (77415/17/1)	gene	hypothetical protein
BCO26_RS11045	BCO26_2149, BCO26_RS11045, GI:503626022, WP_013860098.1	Bacillus_coagulans_2-6.RAST (77415/17/1)	gene	General stress protein 13
BCO26_RS11055	BCO26_2151, BCO26_RS11055, GI:503626024, WP_013860100.1	Bacillus_coagulans_2-6.RAST (77415/17/1)	gene	2,4-dienoyl-CoA reductase [NADPH] (EC 1.3.1.34)
BCO26_RS11060	BCO26_2152, BCO26_RS11060, GI:503626025, WP_013860101.1	Bacillus_coagulans_2-6.RAST (77415/17/1)	gene	oxidoreductase of aldo/keto reductase family, subgroup 1
BCO26_RS11065	BCO26_2153, BCO26_RS11065, GI:908639544, WP_049783565.1	Bacillus_coagulans_2-6.RAST (77415/17/1)	gene	2,5-didehydrogluconate reductase (2-dehydro-D-gluconate-forming) (EC 1.1.1.274)
BCO26_RS11070	BCO26_2154, BCO26_RS11070, GI:503626027, WP_013860103.1	Bacillus_coagulans_2-6.RAST (77415/17/1)	gene	L,D-transpeptidase
BCO26_RS11075	BCO26_2155, BCO26_RS11075, GI:503626028, WP_013860104.1	Bacillus_coagulans_2-6.RAST (77415/17/1)	gene	hypothetical protein
BCO26_RS11080	BCO26_2156, BCO26_RS11080, GI:503626029, WP_013860105.1	Bacillus_coagulans_2-6.RAST (77415/17/1)	gene	Peptidyl-prolyl cis-trans isomerase (EC 5.2.1.8)
BCO26_RS11090	BCO26_2159, BCO26_RS11090, GI:503626032, WP_013860108.1	Bacillus_coagulans_2-6.RAST (77415/17/1)	gene	Uncharacterized MFS-type transporter YuxJ
BCO26_RS11095	BCO26_2160, BCO26_RS11095, GI:503626033, WP_013860109.1	Bacillus_coagulans_2-6.RAST (77415/17/1)	gene	1,4-dihydroxy-2-naphthoyl-CoA hydrolase (EC 3.1.2.28) in menaquinone biosynthesis
BCO26_RS11100	BCO26_2161, BCO26_RS11100, GI:754207417, WP_041819321.1	Bacillus_coagulans_2-6.RAST (77415/17/1)	gene	hypothetical protein
BCO26_RS11110	BCO26_2163, BCO26_RS11110, GI:503626036, WP_013860112.1	Bacillus_coagulans_2-6.RAST (77415/17/1)	gene	Nutrient germinant receptor inner membrane subunit B (GerKB/GerAB/GerBB)
BCO26_RS00140	BCO26_0024, BCO26_RS00140, GI:503623912, WP_013857988.1	Bacillus_coagulans_2-6.RAST (77415/17/1)	gene	Uncharacterized metal-dependent hydrolase YcfH
BCO26_RS01215	BCO26_0213, BCO26_RS01215, GI:503624095, WP_013858171.1	Bacillus_coagulans_2-6.RAST (77415/17/1)	gene	Flavodoxin
BCO26_RS11115	BCO26_2164, BCO26_RS11115, GI:503626037, WP_013860113.1	Bacillus_coagulans_2-6.RAST (77415/17/1)	gene	Spore germination protein GerKC
BCO26_RS11120	BCO26_2165, BCO26_RS11120, GI:503626038, WP_013860114.1	Bacillus_coagulans_2-6.RAST (77415/17/1)	gene	Nutrient germinant receptor inner membrane subunit A (GerKA/GerAA/GerBA)
BCO26_RS11125	BCO26_2166, BCO26_RS11125, GI:503626039, WP_013860115.1	Bacillus_coagulans_2-6.RAST (77415/17/1)	gene	hypothetical protein
BCO26_RS11130	BCO26_2167, BCO26_RS11130, GI:503626040, WP_013860116.1	Bacillus_coagulans_2-6.RAST (77415/17/1)	gene	Cytosol aminopeptidase PepA (EC 3.4.11.1)
BCO26_RS11140	BCO26_2170, BCO26_RS11140, GI:503626043, WP_013860119.1	Bacillus_coagulans_2-6.RAST (77415/17/1)	gene	FIG01225718: hypothetical protein
BCO26_RS11145	BCO26_2171, BCO26_RS11145, GI:651961354, WP_026683853.1	Bacillus_coagulans_2-6.RAST (77415/17/1)	gene	NADH dehydrogenase (EC 1.6.99.3)
BCO26_RS11150	BCO26_2172, BCO26_RS11150, GI:503626045, WP_013860121.1	Bacillus_coagulans_2-6.RAST (77415/17/1)	gene	Thioredoxin reductase (EC 1.8.1.9)
BCO26_RS11155	BCO26_2173, BCO26_RS11155, GI:503626046, WP_013860122.1	Bacillus_coagulans_2-6.RAST (77415/17/1)	gene	Uncharacterized protein SufA
BCO26_RS11160	BCO26_2174, BCO26_RS11160, GI:503626047, WP_013860123.1	Bacillus_coagulans_2-6.RAST (77415/17/1)	gene	YuzD-like protein
BCO26_RS11165	BCO26_2175, BCO26_RS11165, GI:503626048, WP_013860124.1	Bacillus_coagulans_2-6.RAST (77415/17/1)	gene	NifU-like domain protein
BCO26_RS11170	BCO26_2176, BCO26_RS11170, GI:754207421, WP_041819325.1	Bacillus_coagulans_2-6.RAST (77415/17/1)	gene	Endospore coat-associated protein YutH
BCO26_RS11175	BCO26_2177, BCO26_RS11175, GI:503626050, WP_013860126.1	Bacillus_coagulans_2-6.RAST (77415/17/1)	gene	Low temperature requirement C protein
BCO26_RS11180	BCO26_2178, BCO26_RS11180, GI:503626051, WP_013860127.1	Bacillus_coagulans_2-6.RAST (77415/17/1)	gene	Hypothetical NagD-like phosphatase
BCO26_RS11185	BCO26_2179, BCO26_RS11185, GI:503626052, WP_013860128.1	Bacillus_coagulans_2-6.RAST (77415/17/1)	gene	BH3430 unknown conserved protein
BCO26_RS11190	BCO26_2180, BCO26_RS11190, GI:754207423, WP_041819326.1	Bacillus_coagulans_2-6.RAST (77415/17/1)	gene	Uncharacterized DUF1027 domain protein YutD
BCO26_RS11195	BCO26_2181, BCO26_RS11195, GI:503626054, WP_013860130.1	Bacillus_coagulans_2-6.RAST (77415/17/1)	gene	Lipoyl synthase (EC 2.8.1.8)
BCO26_RS11200	BCO26_2182, BCO26_RS11200, GI:503626055, WP_013860131.1	Bacillus_coagulans_2-6.RAST (77415/17/1)	gene	L-Ala--D-Glu endopeptidase
BCO26_RS11205	BCO26_RS11205, GI:516124002, WP_017554582.1	Bacillus_coagulans_2-6.RAST (77415/17/1)	gene	FIG01225377: hypothetical protein
BCO26_RS11210	BCO26_2185, BCO26_RS11210, GI:656147048, WP_029142400.1	Bacillus_coagulans_2-6.RAST (77415/17/1)	gene	Uncharacterized DUF1805-containing protein YunC
BCO26_RS01225	BCO26_0215, BCO26_RS01225, GI:503624097, WP_013858173.1	Bacillus_coagulans_2-6.RAST (77415/17/1)	gene	Transcriptional regulator, Crp/Fnr family
BCO26_RS11215	BCO26_2186, BCO26_RS11215, GI:908639517, WP_049783538.1	Bacillus_coagulans_2-6.RAST (77415/17/1)	gene	5'-nucleotidase family protein in cluster with NagD-like phosphatase
BCO26_RS11220	BCO26_2188, BCO26_RS11220, GI:503626061, WP_013860137.1	Bacillus_coagulans_2-6.RAST (77415/17/1)	gene	Iron-sulfur cluster assembly protein SufB
BCO26_RS11225	BCO26_2189, BCO26_RS11225, GI:754207427, WP_041819329.1	Bacillus_coagulans_2-6.RAST (77415/17/1)	gene	Putative iron-sulfur cluster assembly scaffold protein for SUF system, SufE2
BCO26_RS11230	BCO26_2190, BCO26_RS11230, GI:503626063, WP_013860139.1	Bacillus_coagulans_2-6.RAST (77415/17/1)	gene	Cysteine desulfurase (EC 2.8.1.7) => SufS
BCO26_RS11235	BCO26_2191, BCO26_RS11235, GI:754207430, WP_041819331.1	Bacillus_coagulans_2-6.RAST (77415/17/1)	gene	Iron-sulfur cluster assembly protein SufD
BCO26_RS11240	BCO26_2192, BCO26_RS11240, GI:503626065, WP_013860141.1	Bacillus_coagulans_2-6.RAST (77415/17/1)	gene	Iron-sulfur cluster assembly ATPase protein SufC
BCO26_RS11245	BCO26_2193, BCO26_RS11245, GI:503626066, WP_013860142.1	Bacillus_coagulans_2-6.RAST (77415/17/1)	gene	hypothetical protein
BCO26_RS11255	BCO26_2195, BCO26_RS11255, GI:503626068, WP_013860144.1	Bacillus_coagulans_2-6.RAST (77415/17/1)	gene	Thioredoxin
BCO26_RS11260	BCO26_2196, BCO26_RS11260, GI:503626069, WP_013860145.1	Bacillus_coagulans_2-6.RAST (77415/17/1)	gene	Glycine cleavage system H protein
BCO26_RS01230	BCO26_0216, BCO26_RS01230, GI:503624098, WP_013858174.1	Bacillus_coagulans_2-6.RAST (77415/17/1)	gene	Lead, cadmium, zinc and mercury transporting ATPase (EC 3.6.3.3) (EC 3.6.3.5),Copper-translocating P-type ATPase (EC 3.6.3.4)
BCO26_RS11265	BCO26_2197, BCO26_RS11265, GI:503626070, WP_013860146.1	Bacillus_coagulans_2-6.RAST (77415/17/1)	gene	FIG138056: a glutathione-dependent thiol reductase
BCO26_RS11270	BCO26_2198, BCO26_RS11270, GI:503626071, WP_013860147.1	Bacillus_coagulans_2-6.RAST (77415/17/1)	gene	Long chain acyl-CoA dehydrogenase [fadN-fadA-fadE operon] (EC 1.3.8.8)
BCO26_RS11280	BCO26_2200, BCO26_RS11280, GI:503626073, WP_013860149.1	Bacillus_coagulans_2-6.RAST (77415/17/1)	gene	3-ketoacyl-CoA thiolase [fadN-fadA-fadE operon] (EC 2.3.1.16)
BCO26_RS11290	BCO26_RS11290, GI:516124274, WP_017554854.1	Bacillus_coagulans_2-6.RAST (77415/17/1)	gene	Uncharacterized protein BLi03468
BCO26_RS11295	BCO26_2203, BCO26_RS11295, GI:503626076, WP_013860152.1	Bacillus_coagulans_2-6.RAST (77415/17/1)	gene	Uncharacterized protein YusN
BCO26_RS11300	BCO26_2204, BCO26_RS11300, GI:754207877, WP_041819705.1	Bacillus_coagulans_2-6.RAST (77415/17/1)	gene	Rod shape-determining protein RodA
BCO26_RS11305	BCO26_2205, BCO26_RS11305, GI:656147062, WP_029142407.1	Bacillus_coagulans_2-6.RAST (77415/17/1)	gene	Thioredoxin-like protein YdbP
BCO26_RS11310	BCO26_2206, BCO26_RS11310, GI:503626079, WP_013860155.1	Bacillus_coagulans_2-6.RAST (77415/17/1)	gene	conserved hypothetical protein,putative phospholipase D endonuclease domain
BCO26_RS01235	BCO26_0217, BCO26_RS01235, GI:503624099, WP_013858175.1	Bacillus_coagulans_2-6.RAST (77415/17/1)	gene	Copper chaperone
BCO26_RS11315	BCO26_2208, BCO26_RS11315, GI:503626081, WP_013860157.1	Bacillus_coagulans_2-6.RAST (77415/17/1)	gene	RND multidrug efflux transporter,Acriflavin resistance protein
BCO26_RS11335	BCO26_2211, BCO26_RS11335, GI:503626084, WP_013860160.1	Bacillus_coagulans_2-6.RAST (77415/17/1)	gene	diguanylate cyclase/phosphodiesterase (GGDEF & EAL domains) with PAS/PAC sensor(s)
BCO26_RS11340	BCO26_2212, BCO26_RS11340, GI:754207434, WP_041819335.1	Bacillus_coagulans_2-6.RAST (77415/17/1)	gene	Catalase KatE (EC 1.11.1.6)
BCO26_RS11350	BCO26_2214, BCO26_RS11350, GI:656146437, WP_029142160.1	Bacillus_coagulans_2-6.RAST (77415/17/1)	gene	hypothetical protein
BCO26_RS11355	BCO26_2215, BCO26_RS11355, GI:754207438, WP_041819338.1	Bacillus_coagulans_2-6.RAST (77415/17/1)	gene	1,2-diacylglycerol 3-glucosyltransferase (EC 2.4.1.157),diglucosyldiacylglycerol synthase (LTA membrane anchor synthesis),putative
BCO26_RS01240	BCO26_0219, BCO26_RS01240, GI:503624101, WP_013858177.1	Bacillus_coagulans_2-6.RAST (77415/17/1)	gene	Ribonucleotide reductase of class Ia (aerobic), alpha subunit (EC 1.17.4.1)
BCO26_RS11365	BCO26_2217, BCO26_RS11365, GI:503626090, WP_013860166.1	Bacillus_coagulans_2-6.RAST (77415/17/1)	gene	hypothetical protein
BCO26_RS11370	BCO26_2218, BCO26_RS11370, GI:503626091, WP_013860167.1	Bacillus_coagulans_2-6.RAST (77415/17/1)	gene	hypothetical protein
BCO26_RS11375	BCO26_2219, BCO26_RS11375, GI:503626092, WP_013860168.1	Bacillus_coagulans_2-6.RAST (77415/17/1)	gene	hypothetical protein
BCO26_RS11385	BCO26_2220, BCO26_RS11385, GI:754207441, WP_041819341.1	Bacillus_coagulans_2-6.RAST (77415/17/1)	gene	diglucosyldiacylglycerol synthase (LTA membrane anchor synthesis)
BCO26_RS11390	BCO26_2221, BCO26_RS11390, GI:503626094, WP_013860170.1	Bacillus_coagulans_2-6.RAST (77415/17/1)	gene	hypothetical protein
BCO26_RS01245	BCO26_0220, BCO26_RS01245, GI:518550863, WP_019721070.1	Bacillus_coagulans_2-6.RAST (77415/17/1)	gene	Flavodoxin
BCO26_RS11425	BCO26_2231, BCO26_RS11425, GI:503626104, WP_013860180.1	Bacillus_coagulans_2-6.RAST (77415/17/1)	gene	tmRNA-binding protein SmpB
BCO26_RS11435	BCO26_2233, BCO26_RS11435, GI:737190960, WP_035176608.1	Bacillus_coagulans_2-6.RAST (77415/17/1)	gene	Carboxylesterase (EC 3.1.1.1)
BCO26_RS11440	BCO26_2234, BCO26_RS11440, GI:516120736, WP_017551316.1	Bacillus_coagulans_2-6.RAST (77415/17/1)	gene	Protein translocase membrane subunit SecG
BCO26_RS11445	BCO26_2235, BCO26_RS11445, GI:503626108, WP_013860184.1, eno	Bacillus_coagulans_2-6.RAST (77415/17/1)	gene	Enolase (EC 4.2.1.11)
BCO26_RS11450	BCO26_2237, BCO26_RS11450, GI:503626110, WP_013860186.1	Bacillus_coagulans_2-6.RAST (77415/17/1)	gene	2,3-bisphosphoglycerate-independent phosphoglycerate mutase (EC 5.4.2.12)
BCO26_RS11455	BCO26_2238, BCO26_RS11455, GI:503626111, WP_013860187.1, tpiA	Bacillus_coagulans_2-6.RAST (77415/17/1)	gene	Triosephosphate isomerase (EC 5.3.1.1)
BCO26_RS11460	BCO26_2239, BCO26_RS11460, GI:503626112, WP_013860188.1, pgk	Bacillus_coagulans_2-6.RAST (77415/17/1)	gene	Phosphoglycerate kinase (EC 2.7.2.3)
BCO26_RS11465	BCO26_2240, BCO26_RS11465, GI:503626113, WP_013860189.1	Bacillus_coagulans_2-6.RAST (77415/17/1)	gene	NAD-dependent glyceraldehyde-3-phosphate dehydrogenase (EC 1.2.1.12)
BCO26_RS11470	BCO26_2241, BCO26_RS11470, GI:503626114, WP_013860190.1	Bacillus_coagulans_2-6.RAST (77415/17/1)	gene	Central glycolytic genes regulator
BCO26_RS01250	BCO26_0221, BCO26_RS01250, GI:656146624, WP_029142232.1	Bacillus_coagulans_2-6.RAST (77415/17/1)	gene	Ribonucleotide reductase of class Ia (aerobic), beta subunit (EC 1.17.4.1)
BCO26_RS11475	BCO26_2242, BCO26_RS11475, GI:503626115, WP_013860191.1	Bacillus_coagulans_2-6.RAST (77415/17/1)	gene	hypothetical protein
BCO26_RS11480	BCO26_2243, BCO26_RS11480, GI:503626116, WP_013860192.1	Bacillus_coagulans_2-6.RAST (77415/17/1)	gene	RNA polymerase sigma-54 factor RpoN
BCO26_RS11495	BCO26_2247, BCO26_RS11495, GI:754207448, WP_041819347.1	Bacillus_coagulans_2-6.RAST (77415/17/1)	gene	Formate dehydrogenase related protein
BCO26_RS11510	BCO26_2250, BCO26_RS11510, GI:503626123, WP_013860199.1	Bacillus_coagulans_2-6.RAST (77415/17/1)	gene	Multimodular transpeptidase-transglycosylase (EC 2.4.1.129) (EC 3.4.-.-)
BCO26_RS11515	BCO26_RS11515, GI:754207451, WP_041819349.1	Bacillus_coagulans_2-6.RAST (77415/17/1)	gene	hypothetical protein
BCO26_RS11520	BCO26_2253, BCO26_RS11520, GI:503626126, WP_013860202.1	Bacillus_coagulans_2-6.RAST (77415/17/1)	gene	Oligopeptide ABC transporter, ATP-binding protein OppF (TC 3.A.1.5.1)
BCO26_RS11525	BCO26_2254, BCO26_RS11525, GI:754207453, WP_041819351.1	Bacillus_coagulans_2-6.RAST (77415/17/1)	gene	L-alanyl-gamma-D-glutamyl-L-diamino acid endopeptidase
BCO26_RS01255	BCO26_0222, BCO26_RS01255, GI:754206585, WP_041818625.1	Bacillus_coagulans_2-6.RAST (77415/17/1)	gene	Acyl-phosphate:glycerol-3-phosphate O-acyltransferase PlsY (EC 2.3.1.n3)
BCO26_RS11530	BCO26_2255, BCO26_RS11530, GI:503626128, WP_013860204.1	Bacillus_coagulans_2-6.RAST (77415/17/1)	gene	Dipeptide ABC transporter, substrate-binding protein DppA (TC 3.A.1.5.2)
BCO26_RS11535	BCO26_2256, BCO26_RS11535, GI:503626129, WP_013860205.1	Bacillus_coagulans_2-6.RAST (77415/17/1)	gene	Oligopeptide ABC transporter, ATP-binding protein OppD (TC 3.A.1.5.1)
BCO26_RS11540	BCO26_2257, BCO26_RS11540, GI:503626130, WP_013860206.1	Bacillus_coagulans_2-6.RAST (77415/17/1)	gene	Dipeptide ABC transporter, permease protein DppC (TC 3.A.1.5.2)
BCO26_RS11545	BCO26_2258, BCO26_RS11545, GI:503626131, WP_013860207.1	Bacillus_coagulans_2-6.RAST (77415/17/1)	gene	Dipeptide ABC transporter, permease protein DppB (TC 3.A.1.5.2)
BCO26_RS11550	BCO26_2259, BCO26_RS11550, GI:503626132, WP_013860208.1	Bacillus_coagulans_2-6.RAST (77415/17/1)	gene	Glutamine amidotransferase, class I
BCO26_RS11560	BCO26_2260, BCO26_RS11560, GI:503626133, WP_013860209.1	Bacillus_coagulans_2-6.RAST (77415/17/1)	gene	Magnesium and cobalt transport protein CorA
BCO26_RS11565	BCO26_2261, BCO26_RS11565, GI:503626134, WP_013860210.1	Bacillus_coagulans_2-6.RAST (77415/17/1)	gene	Uncharacterized protein YhdB
BCO26_RS11575	BCO26_2262, BCO26_RS11575, GI:503626135, WP_013860211.1	Bacillus_coagulans_2-6.RAST (77415/17/1)	gene	Spore cortex synthesis protein SpoVR
BCO26_RS11580	BCO26_2263, BCO26_RS11580, GI:503626136, WP_013860212.1	Bacillus_coagulans_2-6.RAST (77415/17/1)	gene	Putative membrane-bound acyltransferase YkrP
BCO26_RS01260	BCO26_0223, BCO26_RS01260, GI:503624105, WP_013858181.1	Bacillus_coagulans_2-6.RAST (77415/17/1)	gene	4,4'-diaponeurosporenoate glycosyltransferase (EC 2.4.1.-)
BCO26_RS11585	BCO26_2264, BCO26_RS11585, GI:503626137, WP_013860213.1	Bacillus_coagulans_2-6.RAST (77415/17/1)	gene	hypothetical protein
BCO26_RS11590	BCO26_RS11590, GI:737198644, WP_035184051.1	Bacillus_coagulans_2-6.RAST (77415/17/1)	gene	putative disulfide oxidoreductase
BCO26_RS11595	BCO26_2265, BCO26_RS11595, GI:503626138, WP_013860214.1	Bacillus_coagulans_2-6.RAST (77415/17/1)	gene	Thioredoxin
BCO26_RS11610	BCO26_2267, BCO26_RS11610, GI:503626140, WP_013860216.1	Bacillus_coagulans_2-6.RAST (77415/17/1)	gene	UPF0111 protein YkaA, likely to be a phosphate transport regulator
BCO26_RS11615	BCO26_2268, BCO26_RS11615, GI:503626141, WP_013860217.1	Bacillus_coagulans_2-6.RAST (77415/17/1)	gene	Probable low-affinity inorganic phosphate transporter
BCO26_RS11620	BCO26_2269, BCO26_RS11620, GI:754207463, WP_041819359.1	Bacillus_coagulans_2-6.RAST (77415/17/1)	gene	Acetyltransferase, GNAT family
BCO26_RS11625	BCO26_RS11625, GI:754207465, WP_041819361.1	Bacillus_coagulans_2-6.RAST (77415/17/1)	gene	hypothetical protein
BCO26_RS11630	BCO26_2270, BCO26_RS11630, GI:503626143, WP_013860219.1	Bacillus_coagulans_2-6.RAST (77415/17/1)	gene	UPF0229 protein YeaH
BCO26_RS00145	BCO26_0025, BCO26_RS00145, GI:503623913, WP_013857989.1	Bacillus_coagulans_2-6.RAST (77415/17/1)	gene	Ribonuclease M5 (EC 3.1.26.8)
BCO26_RS11640	BCO26_2272, BCO26_RS11640, GI:516123834, WP_017554414.1	Bacillus_coagulans_2-6.RAST (77415/17/1)	gene	Serine protein kinase (prkA protein), P-loop containing
BCO26_RS11650	BCO26_2273, BCO26_RS11650, GI:648413115, WP_026104866.1	Bacillus_coagulans_2-6.RAST (77415/17/1)	gene	tRNA (cytidine(34)-2'-O)-methyltransferase (EC 2.1.1.207)
BCO26_RS11655	BCO26_2274, BCO26_RS11655, GI:503626146, WP_013860222.1	Bacillus_coagulans_2-6.RAST (77415/17/1)	gene	Uncharacterized protein YhbB
BCO26_RS11665	BCO26_2276, BCO26_RS11665, GI:503626148, WP_013860224.1	Bacillus_coagulans_2-6.RAST (77415/17/1)	gene	MarC family integral membrane protein
BCO26_RS11675	BCO26_2277, BCO26_RS11675, GI:503626149, WP_013860225.1	Bacillus_coagulans_2-6.RAST (77415/17/1)	gene	Manganese-dependent inorganic pyrophosphatase (EC 3.6.1.1)
BCO26_RS11680	BCO26_2278, BCO26_RS11680, GI:503626150, WP_013860226.1	Bacillus_coagulans_2-6.RAST (77415/17/1)	gene	Uncharacterized protein YhjR
BCO26_RS11685	BCO26_2279, BCO26_RS11685, GI:503626151, WP_013860227.1	Bacillus_coagulans_2-6.RAST (77415/17/1)	gene	L-cystine ABC transporter, substrate-binding protein TcyA
BCO26_RS11690	BCO26_2280, BCO26_RS11690, GI:503626152, WP_013860228.1	Bacillus_coagulans_2-6.RAST (77415/17/1)	gene	L-cystine ABC transporter, permease protein TcyB
BCO26_RS11700	BCO26_2282, BCO26_RS11700, GI:503626154, WP_013860230.1	Bacillus_coagulans_2-6.RAST (77415/17/1)	gene	Formate efflux transporter (TC 2.A.44 family)
BCO26_RS11710	BCO26_2284, BCO26_RS11710, GI:503626156, WP_013860232.1	Bacillus_coagulans_2-6.RAST (77415/17/1)	gene	Pyruvate formate-lyase (EC 2.3.1.54)
BCO26_RS11715	BCO26_2285, BCO26_RS11715, GI:503626157, WP_013860233.1	Bacillus_coagulans_2-6.RAST (77415/17/1)	gene	Pyruvate formate-lyase activating enzyme (EC 1.97.1.4)
BCO26_RS11725	BCO26_2286, BCO26_RS11725, GI:754207474, WP_041819368.1	Bacillus_coagulans_2-6.RAST (77415/17/1)	gene	FMN reductase (EC 1.5.1.29)
BCO26_RS11730	BCO26_2287, BCO26_RS11730, GI:656148293, WP_029142797.1	Bacillus_coagulans_2-6.RAST (77415/17/1)	gene	hypothetical protein
BCO26_RS11735	BCO26_2288, BCO26_RS11735, GI:503626160, WP_013860236.1	Bacillus_coagulans_2-6.RAST (77415/17/1)	gene	ABC transporter, permease protein
BCO26_RS01280	BCO26_0227, BCO26_RS01280, GI:503624109, WP_013858185.1	Bacillus_coagulans_2-6.RAST (77415/17/1)	gene	Broad-specificity multidrug efflux pump YkkD
BCO26_RS11745	BCO26_2290, BCO26_RS11745, GI:656148302, WP_029142799.1	Bacillus_coagulans_2-6.RAST (77415/17/1)	gene	FIG006988: Lipase/Acylhydrolase with GDSL-like motif
BCO26_RS11775	BCO26_2295, BCO26_RS11775, GI:503626167, WP_013860243.1	Bacillus_coagulans_2-6.RAST (77415/17/1)	gene	Luciferase-like monooxygenase YhbW
BCO26_RS11875	BCO26_2300, BCO26_RS11875, GI:503626170, WP_013860246.1	Bacillus_coagulans_2-6.RAST (77415/17/1)	gene	Uncharacterized protein YgxA
BCO26_RS11880	BCO26_2301, BCO26_RS11880, GI:503626171, WP_013860247.1	Bacillus_coagulans_2-6.RAST (77415/17/1)	gene	FIG01236629: hypothetical protein
BCO26_RS01285	BCO26_0228, BCO26_RS01285, GI:503624110, WP_013858186.1	Bacillus_coagulans_2-6.RAST (77415/17/1)	gene	Broad-specificity multidrug efflux pump YkkC
BCO26_RS11885	BCO26_2302, BCO26_RS11885, GI:503626172, WP_013860248.1	Bacillus_coagulans_2-6.RAST (77415/17/1)	gene	Alpha-acetolactate decarboxylase (EC 4.1.1.5)
BCO26_RS11890	2.2.1.6, BCO26_2303, BCO26_RS11890, GI:658518879, WP_029713893.1	Bacillus_coagulans_2-6.RAST (77415/17/1)	gene	Acetolactate synthase, catabolic (EC 2.2.1.6)
BCO26_RS11905	BCO26_RS11905, GI:516120807, WP_017551387.1	Bacillus_coagulans_2-6.RAST (77415/17/1)	gene	Peroxide stress regulator PerR, FUR family
BCO26_RS11915	BCO26_2310, BCO26_RS11915, GI:503626180, WP_013860256.1	Bacillus_coagulans_2-6.RAST (77415/17/1)	gene	ATP:Cob(I)alamin adenosyltransferase (EC 2.5.1.17)
BCO26_RS11920	BCO26_2312, BCO26_RS11920, GI:503626182, WP_013860258.1	Bacillus_coagulans_2-6.RAST (77415/17/1)	gene	Potassium channel protein
BCO26_RS11940	BCO26_2318, BCO26_RS11940, GI:503626188, WP_013860264.1	Bacillus_coagulans_2-6.RAST (77415/17/1)	gene	hypothetical protein
BCO26_RS01290	BCO26_0229, BCO26_RS01290, GI:503624111, WP_013858187.1	Bacillus_coagulans_2-6.RAST (77415/17/1)	gene	Transmembrane protein YfcA
BCO26_RS11945	BCO26_2319, BCO26_RS11945, GI:754207485, WP_041819377.1	Bacillus_coagulans_2-6.RAST (77415/17/1)	gene	Putative lipoprotein SAV1865
BCO26_RS11950	BCO26_2320, BCO26_RS11950, GI:503626190, WP_013860266.1	Bacillus_coagulans_2-6.RAST (77415/17/1)	gene	Transcriptional regulator, RpiR family
BCO26_RS11960	BCO26_2322, BCO26_RS11960, GI:503626192, WP_013860268.1, murQ, yfeU	Bacillus_coagulans_2-6.RAST (77415/17/1)	gene	N-acetylmuramic acid 6-phosphate etherase (EC 4.2.1.126)
BCO26_RS11965	BCO26_2323, BCO26_RS11965, GI:503626193, WP_013860269.1	Bacillus_coagulans_2-6.RAST (77415/17/1)	gene	Outer surface protein of unknown function, cellobiose operon
BCO26_RS11970	BCO26_2324, BCO26_RS11970, GI:503626194, WP_013860270.1	Bacillus_coagulans_2-6.RAST (77415/17/1)	gene	Efflux ABC transporter, permease/ATP-binding protein YgaD
BCO26_RS11975	BCO26_RS11975, GI:648412991, WP_026104742.1	Bacillus_coagulans_2-6.RAST (77415/17/1)	gene	DUF402 family nucleoside diphosphatase
BCO26_RS11980	BCO26_2326, BCO26_RS11980, GI:503626196, WP_013860272.1	Bacillus_coagulans_2-6.RAST (77415/17/1)	gene	hypothetical protein
BCO26_RS11985	BCO26_2327, BCO26_RS11985, GI:503626197, WP_013860273.1	Bacillus_coagulans_2-6.RAST (77415/17/1)	gene	Small acid-soluble spore protein, gamma-type SASP
BCO26_RS11990	BCO26_2328, BCO26_RS11990, GI:503626198, WP_013860274.1	Bacillus_coagulans_2-6.RAST (77415/17/1)	gene	Enoyl-[acyl-carrier-protein] reductase [NADPH] (EC 1.3.1.104), FabL
BCO26_RS01295	BCO26_RS01295, GI:908639526, WP_049783547.1	Bacillus_coagulans_2-6.RAST (77415/17/1)	gene	hypothetical protein
BCO26_RS11995	BCO26_2329, BCO26_RS11995, GI:754207487, WP_041819379.1	Bacillus_coagulans_2-6.RAST (77415/17/1)	gene	Glutamate synthase operon transcriptional activator GltC, LysR family
BCO26_RS12000	BCO26_2330, BCO26_RS12000, GI:754207489, WP_041819381.1	Bacillus_coagulans_2-6.RAST (77415/17/1)	gene	Glutamate synthase [NADPH] large chain (EC 1.4.1.13)
BCO26_RS12030	BCO26_2336, BCO26_RS12030, GI:503626206, WP_013860282.1	Bacillus_coagulans_2-6.RAST (77415/17/1)	gene	Small, acid-soluble spore protein K
BCO26_RS12035	BCO26_2337, BCO26_RS12035, GI:503626207, WP_013860283.1	Bacillus_coagulans_2-6.RAST (77415/17/1)	gene	Uncharacterized membrane protein YfhP
BCO26_RS12040	BCO26_2338, BCO26_RS12040, GI:754207493, WP_041819384.1	Bacillus_coagulans_2-6.RAST (77415/17/1)	gene	A/G-specific adenine glycosylase (EC 3.2.2.-)
BCO26_RS12050	BCO26_2339, BCO26_RS12050, GI:503626209, WP_013860285.1	Bacillus_coagulans_2-6.RAST (77415/17/1)	gene	Transcription regulator CDS_ID OB0894
BCO26_RS12055	BCO26_2341, BCO26_RS12055, GI:503626210, WP_013860286.1	Bacillus_coagulans_2-6.RAST (77415/17/1)	gene	Regulatory protein RecX
BCO26_RS01300	BCO26_0231, BCO26_RS01300, GI:503624113, WP_013858189.1	Bacillus_coagulans_2-6.RAST (77415/17/1)	gene	ABC-type Fe3+-siderophore transport system, permease component
BCO26_RS12060	BCO26_2342, BCO26_RS12060, GI:503626212, WP_013860288.1	Bacillus_coagulans_2-6.RAST (77415/17/1)	gene	Uncharacterized protein YfhD
BCO26_RS12065	BCO26_2344, BCO26_RS12065, GI:503626213, WP_013860289.1	Bacillus_coagulans_2-6.RAST (77415/17/1)	gene	Tryptophan synthase alpha chain (EC 4.2.1.20)
BCO26_RS12070	BCO26_2345, BCO26_RS12070, GI:503626215, WP_013860291.1	Bacillus_coagulans_2-6.RAST (77415/17/1)	gene	Tryptophan synthase beta chain (EC 4.2.1.20)
BCO26_RS12075	BCO26_2346, BCO26_RS12075, GI:503626216, WP_013860292.1	Bacillus_coagulans_2-6.RAST (77415/17/1)	gene	Indole-3-glycerol phosphate synthase (EC 4.1.1.48)
BCO26_RS12080	BCO26_2347, BCO26_RS12080, GI:503626217, WP_013860293.1	Bacillus_coagulans_2-6.RAST (77415/17/1)	gene	Anthranilate phosphoribosyltransferase (EC 2.4.2.18)
BCO26_RS12085	BCO26_2348, BCO26_RS12085, GI:503626218, WP_013860294.1	Bacillus_coagulans_2-6.RAST (77415/17/1)	gene	Anthranilate synthase, amidotransferase component (EC 4.1.3.27)
BCO26_RS12090	BCO26_2349, BCO26_RS12090, GI:503626219, WP_013860295.1	Bacillus_coagulans_2-6.RAST (77415/17/1)	gene	Anthranilate synthase, aminase component (EC 4.1.3.27)
BCO26_RS01305	BCO26_0232, BCO26_RS01305, GI:503624114, WP_013858190.1	Bacillus_coagulans_2-6.RAST (77415/17/1)	gene	Ferrichrome-binding periplasmic protein precursor (TC 3.A.1.14.3)
BCO26_RS12120	BCO26_2355, BCO26_RS12120, GI:503626225, WP_013860301.1	Bacillus_coagulans_2-6.RAST (77415/17/1)	gene	D-3-phosphoglycerate dehydrogenase (EC 1.1.1.95)
BCO26_RS12125	BCO26_2356, BCO26_RS12125, GI:754207888, WP_041819715.1	Bacillus_coagulans_2-6.RAST (77415/17/1)	gene	Serine--glyoxylate aminotransferase (EC 2.6.1.45)
BCO26_RS12130	BCO26_2357, BCO26_RS12130, GI:503626227, WP_013860303.1	Bacillus_coagulans_2-6.RAST (77415/17/1)	gene	D-3-phosphoglycerate dehydrogenase (EC 1.1.1.95)
BCO26_RS12135	BCO26_2358, BCO26_RS12135, GI:754207499, WP_041819389.1	Bacillus_coagulans_2-6.RAST (77415/17/1)	gene	Predicted nicotinate-regulated transporter BH3254
BCO26_RS12140	BCO26_2359, BCO26_RS12140, GI:503626229, WP_013860305.1	Bacillus_coagulans_2-6.RAST (77415/17/1)	gene	Phosphoserine phosphatase (EC 3.1.3.3)
BCO26_RS12145	4.3.1.19, BCO26_2360, BCO26_RS12145, GI:754207502, WP_041819391.1	Bacillus_coagulans_2-6.RAST (77415/17/1)	gene	Threonine dehydratase, catabolic (EC 4.3.1.19) @ L-serine dehydratase, (PLP)-dependent (EC 4.3.1.17)
BCO26_RS12150	BCO26_2361, BCO26_RS12150, GI:503626231, WP_013860307.1	Bacillus_coagulans_2-6.RAST (77415/17/1)	gene	3-isopropylmalate dehydratase small subunit (EC 4.2.1.33)
BCO26_RS12155	BCO26_2362, BCO26_RS12155, GI:503626232, WP_013860308.1	Bacillus_coagulans_2-6.RAST (77415/17/1)	gene	3-isopropylmalate dehydratase large subunit (EC 4.2.1.33)
BCO26_RS12160	BCO26_2363, BCO26_RS12160, GI:503626233, WP_013860309.1	Bacillus_coagulans_2-6.RAST (77415/17/1)	gene	3-isopropylmalate dehydrogenase (EC 1.1.1.85)
BCO26_RS12165	BCO26_2364, BCO26_RS12165, GI:503626234, WP_013860310.1	Bacillus_coagulans_2-6.RAST (77415/17/1)	gene	2-isopropylmalate synthase (EC 2.3.3.13)
BCO26_RS12170	BCO26_2365, BCO26_RS12170, GI:503626235, WP_013860311.1	Bacillus_coagulans_2-6.RAST (77415/17/1)	gene	Ketol-acid reductoisomerase (NADP(+)) (EC 1.1.1.86)
BCO26_RS12175	BCO26_2366, BCO26_RS12175, GI:503626236, WP_013860312.1	Bacillus_coagulans_2-6.RAST (77415/17/1)	gene	Acetolactate synthase small subunit (EC 2.2.1.6)
BCO26_RS12180	2.2.1.6, BCO26_2367, BCO26_RS12180, GI:908639520, WP_049783541.1	Bacillus_coagulans_2-6.RAST (77415/17/1)	gene	Acetolactate synthase large subunit (EC 2.2.1.6)
BCO26_RS12185	BCO26_2368, BCO26_RS12185, GI:503626238, WP_013860314.1	Bacillus_coagulans_2-6.RAST (77415/17/1)	gene	Dihydroxy-acid dehydratase (EC 4.2.1.9)
BCO26_RS12195	BCO26_2369, BCO26_RS12195, GI:503626239, WP_013860315.1	Bacillus_coagulans_2-6.RAST (77415/17/1)	gene	Na(+)-dependent branched-chain amino acid transporter
BCO26_RS12200	BCO26_2370, BCO26_RS12200, GI:503626240, WP_013860316.1	Bacillus_coagulans_2-6.RAST (77415/17/1)	gene	RsbR, positive regulator of sigma-B
BCO26_RS01315	BCO26_0233, BCO26_RS01315, GI:503624115, WP_013858191.1, fecE	Bacillus_coagulans_2-6.RAST (77415/17/1)	gene	Ferrichrome transport ATP-binding protein FhuC (TC 3.A.1.14.3)
BCO26_RS12225	BCO26_2373, BCO26_RS12225, GI:503626242, WP_013860318.1	Bacillus_coagulans_2-6.RAST (77415/17/1)	gene	FIG01231219: hypothetical protein
BCO26_RS12230	2.1.1.14, BCO26_2374, BCO26_RS12230, GI:754207506, WP_041819395.1	Bacillus_coagulans_2-6.RAST (77415/17/1)	gene	Methionine synthase II (cobalamin-independent)
BCO26_RS12235	BCO26_2375, BCO26_RS12235, GI:503626244, WP_013860320.1	Bacillus_coagulans_2-6.RAST (77415/17/1)	gene	Oxalate/formate antiporter
BCO26_RS12250	BCO26_2377, BCO26_RS12250, GI:503626245, WP_013860321.1	Bacillus_coagulans_2-6.RAST (77415/17/1)	gene	Two-component transcriptional response regulator YpdB
BCO26_RS12255	BCO26_RS12255, GI:908639546, WP_049783567.1	Bacillus_coagulans_2-6.RAST (77415/17/1)	gene	Sensor histidine kinase YpdA
BCO26_RS12260	BCO26_2379, BCO26_RS12260, GI:503626247, WP_013860323.1	Bacillus_coagulans_2-6.RAST (77415/17/1)	gene	L-asparaginase I, cytoplasmic (EC 3.5.1.1)
BCO26_RS12275	BCO26_2382, BCO26_RS12275, GI:503626250, WP_013860326.1	Bacillus_coagulans_2-6.RAST (77415/17/1)	gene	Phage infection protein
BCO26_RS00150	BCO26_0026, BCO26_RS00150, GI:503623914, WP_013857990.1	Bacillus_coagulans_2-6.RAST (77415/17/1)	gene	SSU rRNA (adenine(1518)-N(6)/adenine(1519)-N(6))-dimethyltransferase (EC 2.1.1.182)
BCO26_RS01320	BCO26_0234, BCO26_RS01320, GI:754206594, WP_041818632.1	Bacillus_coagulans_2-6.RAST (77415/17/1)	gene	Thioredoxin reductase (EC 1.8.1.9)
BCO26_RS12300	BCO26_RS12300, GI:754207511, WP_041819399.1	Bacillus_coagulans_2-6.RAST (77415/17/1)	gene	hypothetical protein
BCO26_RS12305	BCO26_2388, BCO26_RS12305, GI:503626256, WP_013860332.1	Bacillus_coagulans_2-6.RAST (77415/17/1)	gene	L-cystine uptake protein TcyP, sodium:anion symporter family
BCO26_RS12310	BCO26_2389, BCO26_RS12310, GI:503626257, WP_013860333.1	Bacillus_coagulans_2-6.RAST (77415/17/1)	gene	hypothetical protein
BCO26_RS12315	BCO26_2391, BCO26_RS12315, GI:754207513, WP_041819401.1	Bacillus_coagulans_2-6.RAST (77415/17/1)	gene	transmembrane protein, distant homology with ydbT
BCO26_RS12330	BCO26_RS12330, GI:516119529, WP_017550109.1	Bacillus_coagulans_2-6.RAST (77415/17/1)	gene	FIG01251890: hypothetical protein
BCO26_RS12345	BCO26_2395, BCO26_RS12345, GI:503626263, WP_013860339.1	Bacillus_coagulans_2-6.RAST (77415/17/1)	gene	tRNA-dihydrouridine synthase 2
BCO26_RS01330	BCO26_0236, BCO26_RS01330, GI:503624118, WP_013858194.1	Bacillus_coagulans_2-6.RAST (77415/17/1)	gene	hypothetical protein
BCO26_RS12395	BCO26_2402, BCO26_RS12395, GI:503626270, WP_013860346.1	Bacillus_coagulans_2-6.RAST (77415/17/1)	gene	Lipid A export permease/ATP-binding protein MsbA
BCO26_RS12400	BCO26_2403, BCO26_RS12400, GI:503626271, WP_013860347.1	Bacillus_coagulans_2-6.RAST (77415/17/1)	gene	Transcriptional regulator, MarR family
BCO26_RS12425	BCO26_2407, BCO26_RS12425, GI:503626275, WP_013860351.1	Bacillus_coagulans_2-6.RAST (77415/17/1)	gene	DNA-3-methyladenine glycosylase II (EC 3.2.2.21)
BCO26_RS12430	BCO26_2408, BCO26_RS12430, GI:503626276, WP_013860352.1	Bacillus_coagulans_2-6.RAST (77415/17/1)	gene	Peptidoglycan-N-acetylmuramic acid deacetylase PdaA
BCO26_RS12435	BCO26_2409, BCO26_RS12435, GI:503626277, WP_013860353.1	Bacillus_coagulans_2-6.RAST (77415/17/1)	gene	FIG01226681: hypothetical protein
BCO26_RS12440	BCO26_2410, BCO26_RS12440, GI:503626278, WP_013860354.1	Bacillus_coagulans_2-6.RAST (77415/17/1)	gene	Uncharacterized protein YfkD
BCO26_RS01335	BCO26_RS01335, GI:754206597, WP_041818635.1	Bacillus_coagulans_2-6.RAST (77415/17/1)	gene	hypothetical protein
BCO26_RS12450	BCO26_2411, BCO26_RS12450, GI:503626279, WP_013860355.1	Bacillus_coagulans_2-6.RAST (77415/17/1)	gene	Ca(2+)/H(+) antiporter
BCO26_RS12455	BCO26_2412, BCO26_RS12455, GI:754207534, WP_041819418.1	Bacillus_coagulans_2-6.RAST (77415/17/1)	gene	Uncharacterized MFS-type transporter YfkF
BCO26_RS12460	BCO26_2413, BCO26_RS12460, GI:503626281, WP_013860357.1	Bacillus_coagulans_2-6.RAST (77415/17/1)	gene	Ribonuclease BN (EC 3.1.-.-)
BCO26_RS12465	BCO26_2414, BCO26_RS12465, GI:648413092, WP_026104843.1	Bacillus_coagulans_2-6.RAST (77415/17/1)	gene	Hypothetical protein YfkK
BCO26_RS12470	BCO26_2415, BCO26_RS12470, GI:503626283, WP_013860359.1	Bacillus_coagulans_2-6.RAST (77415/17/1)	gene	Methionine aminopeptidase (EC 3.4.11.18)
BCO26_RS12475	BCO26_2416, BCO26_RS12475, GI:503626284, WP_013860360.1	Bacillus_coagulans_2-6.RAST (77415/17/1)	gene	ThiJ/PfpI family protein YhbO
BCO26_RS12485	BCO26_2418, BCO26_RS12485, GI:503626286, WP_013860362.1	Bacillus_coagulans_2-6.RAST (77415/17/1)	gene	Flagellar motor rotation protein MotA
BCO26_RS12490	BCO26_2420, BCO26_RS12490, GI:503626288, WP_013860364.1	Bacillus_coagulans_2-6.RAST (77415/17/1)	gene	hypothetical protein
BCO26_RS12495	BCO26_2422, BCO26_RS12495, GI:503626290, WP_013860366.1	Bacillus_coagulans_2-6.RAST (77415/17/1)	gene	DUF488 family protein SAV0238
BCO26_RS01340	BCO26_RS01340, GI:754206601, WP_041818638.1	Bacillus_coagulans_2-6.RAST (77415/17/1)	gene	Transcriptional regulatory protein YeeN
BCO26_RS12500	BCO26_2423, BCO26_RS12500, GI:503626291, WP_013860367.1	Bacillus_coagulans_2-6.RAST (77415/17/1)	gene	FIG00673198: hypothetical protein
BCO26_RS12505	BCO26_2424, BCO26_RS12505, GI:503626292, WP_013860368.1	Bacillus_coagulans_2-6.RAST (77415/17/1)	gene	Uncharacterized protein YteA
BCO26_RS12510	BCO26_RS12510, GI:908639547, WP_049783568.1	Bacillus_coagulans_2-6.RAST (77415/17/1)	gene	Acyl-CoA hydrolase (EC 3.1.2.20)
BCO26_RS12520	BCO26_2428, BCO26_RS12520, GI:503626296, WP_013860372.1	Bacillus_coagulans_2-6.RAST (77415/17/1)	gene	Inner membrane protein YqiK
BCO26_RS12525	BCO26_2429, BCO26_RS12525, GI:754207537, WP_041819420.1	Bacillus_coagulans_2-6.RAST (77415/17/1)	gene	Uncharacterized membrane protein YuaF
BCO26_RS12530	BCO26_2430, BCO26_RS12530, GI:503626298, WP_013860374.1	Bacillus_coagulans_2-6.RAST (77415/17/1)	gene	Cystathionine gamma-lyase (EC 4.4.1.1)
BCO26_RS12535	BCO26_2431, BCO26_RS12535, GI:503626299, WP_013860375.1	Bacillus_coagulans_2-6.RAST (77415/17/1)	gene	Cystathionine beta-synthase (EC 4.2.1.22)
BCO26_RS12540	BCO26_2432, BCO26_RS12540, GI:503626300, WP_013860376.1	Bacillus_coagulans_2-6.RAST (77415/17/1)	gene	S-ribosylhomocysteine lyase (EC 4.4.1.21) @ Autoinducer-2 production protein LuxS
BCO26_RS01345	BCO26_RS01345, GI:754206604, WP_041818641.1	Bacillus_coagulans_2-6.RAST (77415/17/1)	gene	hypothetical protein
BCO26_RS12550	BCO26_2434, BCO26_RS12550, GI:503626302, WP_013860378.1	Bacillus_coagulans_2-6.RAST (77415/17/1)	gene	Carbonic anhydrase, beta class (EC 4.2.1.1)
BCO26_RS12565	BCO26_2437, BCO26_RS12565, GI:754207542, WP_041819424.1	Bacillus_coagulans_2-6.RAST (77415/17/1)	gene	hypothetical protein
BCO26_RS12570	BCO26_2439, BCO26_RS12570, GI:503626307, WP_013860383.1	Bacillus_coagulans_2-6.RAST (77415/17/1)	gene	hypothetical protein
BCO26_RS12575	BCO26_2440, BCO26_RS12575, GI:503626308, WP_013860384.1	Bacillus_coagulans_2-6.RAST (77415/17/1)	gene	hypothetical protein
BCO26_RS12580	BCO26_2441, BCO26_RS12580, GI:503626309, WP_013860385.1	Bacillus_coagulans_2-6.RAST (77415/17/1)	gene	hypothetical protein
BCO26_RS12585	BCO26_2442, BCO26_RS12585, GI:503626310, WP_013860386.1	Bacillus_coagulans_2-6.RAST (77415/17/1)	gene	Extracellular protein
BCO26_RS12595	BCO26_2444, BCO26_RS12595, GI:503626312, WP_013860388.1	Bacillus_coagulans_2-6.RAST (77415/17/1)	gene	2',3'-cyclic-nucleotide 2'-phosphodiesterase (EC 3.1.4.16) / 3'-nucleotidase (EC 3.1.3.6)
BCO26_RS12600	BCO26_2445, BCO26_RS12600, GI:503626313, WP_013860389.1	Bacillus_coagulans_2-6.RAST (77415/17/1)	gene	Glutamate-aspartate carrier protein
BCO26_RS12605	BCO26_2447, BCO26_RS12605, GI:503626315, WP_013860391.1	Bacillus_coagulans_2-6.RAST (77415/17/1)	gene	hypothetical protein
BCO26_RS12615	BCO26_2448, BCO26_RS12615, GI:503626316, WP_013860392.1	Bacillus_coagulans_2-6.RAST (77415/17/1)	gene	hypothetical protein
BCO26_RS01355	BCO26_0241, BCO26_RS01355, GI:503624123, WP_013858199.1, gabD	Bacillus_coagulans_2-6.RAST (77415/17/1)	gene	Succinate-semialdehyde dehydrogenase [NAD(P)+] (EC 1.2.1.16)
BCO26_RS12680	BCO26_2458, BCO26_RS12680, GI:754207551, WP_041819432.1	Bacillus_coagulans_2-6.RAST (77415/17/1)	gene	DNA/RNA helicases, SNF2 family
BCO26_RS12685	BCO26_2459, BCO26_RS12685, GI:503626327, WP_013860403.1	Bacillus_coagulans_2-6.RAST (77415/17/1)	gene	Nitroreductase
BCO26_RS12690	BCO26_2460, BCO26_RS12690, GI:503626328, WP_013860404.1	Bacillus_coagulans_2-6.RAST (77415/17/1)	gene	Uncharacterized protein BA0167
BCO26_RS12695	5.3.3.2, BCO26_2462, BCO26_RS12695, GI:518551894, WP_019722101.1	Bacillus_coagulans_2-6.RAST (77415/17/1)	gene	Isopentenyl-diphosphate delta-isomerase, FMN-dependent (EC 5.3.3.2)
BCO26_RS12705	BCO26_2464, BCO26_RS12705, GI:503626332, WP_013860408.1	Bacillus_coagulans_2-6.RAST (77415/17/1)	gene	hypothetical protein
BCO26_RS12710	BCO26_2465, BCO26_RS12710, GI:503626333, WP_013860409.1	Bacillus_coagulans_2-6.RAST (77415/17/1)	gene	Na+/H+ antiporter
BCO26_RS12720	BCO26_2467, BCO26_RS12720, GI:503626335, WP_013860411.1	Bacillus_coagulans_2-6.RAST (77415/17/1)	gene	Transcriptional repressor of the fructose operon, DeoR family
BCO26_RS12730	BCO26_2469, BCO26_RS12730, GI:503626337, WP_013860413.1	Bacillus_coagulans_2-6.RAST (77415/17/1)	gene	FIG00673463: hypothetical protein
BCO26_RS12740	BCO26_2471, BCO26_RS12740, GI:503626339, WP_013860415.1	Bacillus_coagulans_2-6.RAST (77415/17/1)	gene	hypothetical protein
BCO26_RS12745	BCO26_2472, BCO26_RS12745, GI:503626340, WP_013860416.1	Bacillus_coagulans_2-6.RAST (77415/17/1)	gene	Sugar phosphatase YidA (EC 3.1.3.23)
BCO26_RS12750	BCO26_2473, BCO26_RS12750, GI:503626341, WP_013860417.1	Bacillus_coagulans_2-6.RAST (77415/17/1)	gene	hypothetical protein
BCO26_RS12755	BCO26_2474, BCO26_RS12755, GI:503626342, WP_013860418.1	Bacillus_coagulans_2-6.RAST (77415/17/1)	gene	hypothetical protein
BCO26_RS12760	BCO26_2475, BCO26_RS12760, GI:754207553, WP_041819434.1	Bacillus_coagulans_2-6.RAST (77415/17/1)	gene	Major myo-inositol transporter IolT
BCO26_RS01365	BCO26_0242, BCO26_RS01365, GI:503624124, WP_013858200.1	Bacillus_coagulans_2-6.RAST (77415/17/1)	gene	Pre-neck appendage protein
BCO26_RS12765	BCO26_2476, BCO26_RS12765, GI:503626344, WP_013860420.1	Bacillus_coagulans_2-6.RAST (77415/17/1)	gene	23S rRNA (adenine(2503)-C(2))-methyltransferase @ tRNA (adenine(37)-C(2))-methyltransferase (EC 2.1.1.192)
BCO26_RS12770	BCO26_2477, BCO26_RS12770, GI:503626345, WP_013860421.1	Bacillus_coagulans_2-6.RAST (77415/17/1)	gene	hypothetical protein
BCO26_RS12780	BCO26_2479, BCO26_RS12780, GI:516123699, WP_017554279.1	Bacillus_coagulans_2-6.RAST (77415/17/1)	gene	hypothetical protein
BCO26_RS12800	BCO26_2483, BCO26_RS12800, GI:503626351, WP_013860427.1	Bacillus_coagulans_2-6.RAST (77415/17/1)	gene	Phosphoenolpyruvate-dihydroxyacetone phosphotransferase (EC 2.7.1.121), subunit DhaM,DHA-specific IIA component
BCO26_RS12805	BCO26_2484, BCO26_RS12805, GI:503626352, WP_013860428.1	Bacillus_coagulans_2-6.RAST (77415/17/1)	gene	Phosphoenolpyruvate-dihydroxyacetone phosphotransferase (EC 2.7.1.121), ADP-binding subunit DhaL
BCO26_RS12810	BCO26_2485, BCO26_RS12810, GI:503626353, WP_013860429.1	Bacillus_coagulans_2-6.RAST (77415/17/1)	gene	Phosphoenolpyruvate-dihydroxyacetone phosphotransferase (EC 2.7.1.121), dihydroxyacetone binding subunit DhaK
BCO26_RS00155	BCO26_0027, BCO26_RS00155, GI:516123401, WP_017553981.1	Bacillus_coagulans_2-6.RAST (77415/17/1)	gene	Sporulation-specific protease YabG
BCO26_RS01370	BCO26_RS01370, GI:754206613, WP_041818649.1	Bacillus_coagulans_2-6.RAST (77415/17/1)	gene	Phosphoadenylyl-sulfate reductase [thioredoxin] (EC 1.8.4.8)
BCO26_RS12815	BCO26_2486, BCO26_RS12815, GI:754207559, WP_041819439.1	Bacillus_coagulans_2-6.RAST (77415/17/1)	gene	Membrane protein
BCO26_RS01375	BCO26_0244, BCO26_RS01375, GI:503624126, WP_013858202.1	Bacillus_coagulans_2-6.RAST (77415/17/1)	gene	Uroporphyrinogen-III methyltransferase (EC 2.1.1.107)
BCO26_RS12870	BCO26_2495, BCO26_RS12870, GI:503626362, WP_013860438.1	Bacillus_coagulans_2-6.RAST (77415/17/1)	gene	FMN reductase (NADPH) (EC 1.5.1.38)
BCO26_RS01380	BCO26_0245, BCO26_RS01380, GI:503624127, WP_013858203.1	Bacillus_coagulans_2-6.RAST (77415/17/1)	gene	Sirohydrochlorin ferrochelatase SirB (EC 4.99.1.4)
BCO26_RS12915	BCO26_2504, BCO26_RS12915, GI:503626370, WP_013860446.1	Bacillus_coagulans_2-6.RAST (77415/17/1)	gene	Uncharacterized amino acid permease, GabP family
BCO26_RS12920	BCO26_2505, BCO26_RS12920, GI:754207914, WP_041819736.1	Bacillus_coagulans_2-6.RAST (77415/17/1)	gene	UPF0721 transmembrane protein YtnM
BCO26_RS12935	BCO26_2509, BCO26_RS12935, GI:754207576, WP_041819453.1	Bacillus_coagulans_2-6.RAST (77415/17/1)	gene	Xanthine permease
BCO26_RS12955	BCO26_2513, BCO26_RS12955, GI:503626379, WP_013860455.1	Bacillus_coagulans_2-6.RAST (77415/17/1)	gene	Thioredoxin reductase (EC 1.8.1.9)
BCO26_RS12960	BCO26_2514, BCO26_RS12960, GI:503626380, WP_013860456.1	Bacillus_coagulans_2-6.RAST (77415/17/1)	gene	Histone acetyltransferase HPA2 and related acetyltransferases
BCO26_RS12990	BCO26_2522, BCO26_RS12990, GI:503626388, WP_013860464.1	Bacillus_coagulans_2-6.RAST (77415/17/1)	gene	Transcriptional regulator, AcrR family
BCO26_RS12995	BCO26_2523, BCO26_RS12995, GI:754207581, WP_041819457.1	Bacillus_coagulans_2-6.RAST (77415/17/1)	gene	Efflux ABC transporter, permease protein
BCO26_RS13005	BCO26_2524, BCO26_RS13005, GI:503626390, WP_013860466.1	Bacillus_coagulans_2-6.RAST (77415/17/1)	gene	Efflux ABC transporter, ATP-binding protein
BCO26_RS13035	BCO26_2530, BCO26_RS13035, GI:503626396, WP_013860472.1	Bacillus_coagulans_2-6.RAST (77415/17/1)	gene	Fructose-bisphosphate aldolase class I (EC 4.1.2.13)
BCO26_RS01390	BCO26_0246, BCO26_RS01390, GI:503624128, WP_013858204.1	Bacillus_coagulans_2-6.RAST (77415/17/1)	gene	Siroheme synthase / Precorrin-2 oxidase (EC 1.3.1.76)
BCO26_RS01395	BCO26_0247, BCO26_RS01395, GI:503624129, WP_013858205.1	Bacillus_coagulans_2-6.RAST (77415/17/1)	gene	tRNA proofreading protein STM4549
BCO26_RS13135	BCO26_2549, BCO26_RS13135, GI:503863089, WP_014097083.1	Bacillus_coagulans_2-6.RAST (77415/17/1)	gene	Transporter, LysE family
BCO26_RS13140	BCO26_2550, BCO26_RS13140, GI:503626416, WP_013860492.1	Bacillus_coagulans_2-6.RAST (77415/17/1)	gene	Glutathione peroxidase (EC 1.11.1.9) @ Thioredoxin peroxidase (EC 1.11.1.15)
BCO26_RS13145	BCO26_2551, BCO26_RS13145, GI:503626417, WP_013860493.1	Bacillus_coagulans_2-6.RAST (77415/17/1)	gene	hypothetical protein
BCO26_RS01400	BCO26_0248, BCO26_RS01400, GI:503624130, WP_013858206.1	Bacillus_coagulans_2-6.RAST (77415/17/1)	gene	Glycerol dehydrogenase (EC 1.1.1.6)
BCO26_RS13190	BCO26_RS13190, GI:754207591, WP_041819465.1	Bacillus_coagulans_2-6.RAST (77415/17/1)	gene	Ribonucleotide reductase of class III (anaerobic), activating protein (EC 1.97.1.4)
BCO26_RS13195	BCO26_2560, BCO26_RS13195, GI:503626426, WP_013860502.1	Bacillus_coagulans_2-6.RAST (77415/17/1)	gene	Ribonucleotide reductase of class III (anaerobic), large subunit (EC 1.17.4.2)
BCO26_RS13210	BCO26_2563, BCO26_RS13210, GI:754205854, WP_041818033.1	Bacillus_coagulans_2-6.RAST (77415/17/1)	gene	Glycerate kinase (EC 2.7.1.31)
BCO26_RS01405	BCO26_0249, BCO26_RS01405, GI:503624131, WP_013858207.1	Bacillus_coagulans_2-6.RAST (77415/17/1)	gene	Long-chain-fatty-acid--CoA ligase (EC 6.2.1.3)
BCO26_RS13295	BCO26_RS13295, GI:754207597, WP_041819470.1	Bacillus_coagulans_2-6.RAST (77415/17/1)	gene	hypothetical protein
BCO26_RS13315	BCO26_2584, BCO26_RS13315, GI:518551361, WP_019721568.1	Bacillus_coagulans_2-6.RAST (77415/17/1)	gene	Carbon-nitrogen hydrolase
BCO26_RS01415	BCO26_0251, BCO26_RS01415, GI:503624133, WP_013858209.1	Bacillus_coagulans_2-6.RAST (77415/17/1)	gene	hypothetical protein
BCO26_RS13350	BCO26_2592, BCO26_RS13350, GI:503626456, WP_013860532.1	Bacillus_coagulans_2-6.RAST (77415/17/1)	gene	GMP reductase (EC 1.7.1.7)
BCO26_RS13365	BCO26_2593, BCO26_RS13365, GI:503626457, WP_013860533.1	Bacillus_coagulans_2-6.RAST (77415/17/1)	gene	5-methyltetrahydropteroyltriglutamate--homocysteine methyltransferase (EC 2.1.1.14)
BCO26_RS13370	BCO26_2594, BCO26_RS13370, GI:503626458, WP_013860534.1	Bacillus_coagulans_2-6.RAST (77415/17/1)	gene	Cytidine deaminase (EC 3.5.4.5)
BCO26_RS13375	BCO26_2595, BCO26_RS13375, GI:503626459, WP_013860535.1	Bacillus_coagulans_2-6.RAST (77415/17/1)	gene	Deoxyribose-phosphate aldolase (EC 4.1.2.4)
BCO26_RS00160	BCO26_0028, BCO26_RS00160, GI:503623916, WP_013857992.1	Bacillus_coagulans_2-6.RAST (77415/17/1)	gene	Veg protein
BCO26_RS01420	BCO26_0252, BCO26_RS01420, GI:503624134, WP_013858210.1	Bacillus_coagulans_2-6.RAST (77415/17/1)	gene	Permease of the drug/metabolite transporter (DMT) superfamily
BCO26_RS13380	BCO26_2596, BCO26_RS13380, GI:503626460, WP_013860536.1, deoA	Bacillus_coagulans_2-6.RAST (77415/17/1)	gene	Pyrimidine-nucleoside phosphorylase (EC 2.4.2.2)
BCO26_RS13385	5.4.2.7, BCO26_2597, BCO26_RS13385, GI:516123813, WP_017554393.1	Bacillus_coagulans_2-6.RAST (77415/17/1)	gene	Phosphopentomutase (EC 5.4.2.7)
BCO26_RS13395	BCO26_2600, BCO26_RS13395, GI:503626464, WP_013860540.1	Bacillus_coagulans_2-6.RAST (77415/17/1)	gene	Purine nucleoside phosphorylase (EC 2.4.2.1)
BCO26_RS13400	BCO26_2601, BCO26_RS13400, GI:503626465, WP_013860541.1	Bacillus_coagulans_2-6.RAST (77415/17/1)	gene	Pyrimidine nucleoside transporter
BCO26_RS13410	BCO26_RS13410, GI:908639522, WP_049783543.1	Bacillus_coagulans_2-6.RAST (77415/17/1)	gene	Guanine/hypoxanthine permease
BCO26_RS13415	BCO26_2604, BCO26_RS13415, GI:503626468, WP_013860544.1	Bacillus_coagulans_2-6.RAST (77415/17/1)	gene	Pyrrolidone-carboxylate peptidase (EC 3.4.19.3)
BCO26_RS13420	BCO26_2605, BCO26_RS13420, GI:503626469, WP_013860545.1	Bacillus_coagulans_2-6.RAST (77415/17/1)	gene	FIG001614: Membrane protein
BCO26_RS13425	BCO26_2606, BCO26_RS13425, GI:503626470, WP_013860546.1	Bacillus_coagulans_2-6.RAST (77415/17/1)	gene	FIG015373: Membrane protein
BCO26_RS01425	BCO26_0253, BCO26_RS01425, GI:754206618, WP_041818653.1	Bacillus_coagulans_2-6.RAST (77415/17/1)	gene	hypothetical protein
BCO26_RS13430	BCO26_2607, BCO26_RS13430, GI:503626471, WP_013860547.1	Bacillus_coagulans_2-6.RAST (77415/17/1)	gene	Lactam utilization protein LamB
BCO26_RS13435	BCO26_2608, BCO26_RS13435, GI:503626472, WP_013860548.1	Bacillus_coagulans_2-6.RAST (77415/17/1)	gene	Allophanate hydrolase 2 subunit 2 (EC 3.5.1.54)
BCO26_RS13440	BCO26_2609, BCO26_RS13440, GI:503626473, WP_013860549.1	Bacillus_coagulans_2-6.RAST (77415/17/1)	gene	Allophanate hydrolase 2 subunit 1 (EC 3.5.1.54)
BCO26_RS13445	BCO26_2610, BCO26_RS13445, GI:503626474, WP_013860550.1	Bacillus_coagulans_2-6.RAST (77415/17/1)	gene	Uncharacterized MFS-type transporter
BCO26_RS13450	BCO26_2611, BCO26_RS13450, GI:503626475, WP_013860551.1	Bacillus_coagulans_2-6.RAST (77415/17/1)	gene	Uncharacterized protein YmaD
BCO26_RS13455	BCO26_RS13455, GI:518551382, WP_019721589.1	Bacillus_coagulans_2-6.RAST (77415/17/1)	gene	ABC transporter, ATP-binding protein (cluster 3, basic aa/glutamine/opines)
BCO26_RS13460	BCO26_2614, BCO26_RS13460, GI:503626478, WP_013860554.1	Bacillus_coagulans_2-6.RAST (77415/17/1)	gene	Arginine transport system permease protein ArtQ
BCO26_RS13465	BCO26_2615, BCO26_RS13465, GI:503626479, WP_013860555.1	Bacillus_coagulans_2-6.RAST (77415/17/1)	gene	ABC transporter, substrate-binding protein (cluster 3, basic aa/glutamine/opines)
BCO26_RS13470	BCO26_2616, BCO26_RS13470, GI:754207606, WP_041819477.1	Bacillus_coagulans_2-6.RAST (77415/17/1)	gene	N-acyl-L-amino acid amidohydrolase (EC 3.5.1.14)
BCO26_RS13475	BCO26_2617, BCO26_RS13475, GI:503626481, WP_013860557.1	Bacillus_coagulans_2-6.RAST (77415/17/1)	gene	Chaperone protein HtpG
BCO26_RS13485	BCO26_2619, BCO26_RS13485, GI:503626483, WP_013860559.1	Bacillus_coagulans_2-6.RAST (77415/17/1)	gene	hypothetical protein
BCO26_RS13490	BCO26_RS13490, GI:754207607, WP_041819478.1	Bacillus_coagulans_2-6.RAST (77415/17/1)	gene	hypothetical protein
BCO26_RS13495	BCO26_2622, BCO26_RS13495, GI:503626486, WP_013860562.1	Bacillus_coagulans_2-6.RAST (77415/17/1)	gene	Glycerate kinase (EC 2.7.1.31)
BCO26_RS13500	BCO26_2623, BCO26_RS13500, GI:503626487, WP_013860563.1	Bacillus_coagulans_2-6.RAST (77415/17/1)	gene	D-amino acid dehydrogenase small subunit (EC 1.4.99.1)
BCO26_RS01435	BCO26_0254, BCO26_RS01435, GI:503624136, WP_013858212.1	Bacillus_coagulans_2-6.RAST (77415/17/1)	gene	Cobalt-zinc-cadmium resistance protein
BCO26_RS13565	BCO26_2632, BCO26_RS13565, GI:503626495, WP_013860571.1	Bacillus_coagulans_2-6.RAST (77415/17/1)	gene	hypothetical protein
BCO26_RS13575	BCO26_2633, BCO26_RS13575, GI:503626496, WP_013860572.1	Bacillus_coagulans_2-6.RAST (77415/17/1)	gene	23S rRNA (uracil(1939)-C(5))-methyltransferase (EC 2.1.1.190)
BCO26_RS13585	BCO26_2635, BCO26_RS13585, GI:754207942, WP_041819759.1	Bacillus_coagulans_2-6.RAST (77415/17/1)	gene	Proline/sodium symporter PutP (TC 2.A.21.2.1) @ Propionate/sodium symporter
BCO26_RS13590	BCO26_2636, BCO26_RS13590, GI:503626498, WP_013860574.1	Bacillus_coagulans_2-6.RAST (77415/17/1)	gene	Transcription regulator [contains diacylglycerol kinase catalytic domain]
BCO26_RS13595	BCO26_RS13595, GI:656144129, WP_029141344.1	Bacillus_coagulans_2-6.RAST (77415/17/1)	gene	hypothetical protein
BCO26_RS13605	BCO26_2638, BCO26_RS13605, GI:503626500, WP_013860576.1	Bacillus_coagulans_2-6.RAST (77415/17/1)	gene	General stress protein
BCO26_RS13610	BCO26_2639, BCO26_RS13610, GI:503626501, WP_013860577.1	Bacillus_coagulans_2-6.RAST (77415/17/1)	gene	hypothetical protein
BCO26_RS01440	BCO26_0255, BCO26_RS01440, GI:503624137, WP_013858213.1	Bacillus_coagulans_2-6.RAST (77415/17/1)	gene	Glutamine--fructose-6-phosphate aminotransferase [isomerizing] (EC 2.6.1.16)
BCO26_RS13615	BCO26_2640, BCO26_RS13615, GI:503626502, WP_013860578.1	Bacillus_coagulans_2-6.RAST (77415/17/1)	gene	Aspartyl-tRNA(Asn) amidotransferase subunit B (EC 6.3.5.6) @ Glutamyl-tRNA(Gln) amidotransferase subunit B (EC 6.3.5.7)
BCO26_RS13625	BCO26_2642, BCO26_RS13625, GI:503626504, WP_013860580.1	Bacillus_coagulans_2-6.RAST (77415/17/1)	gene	Aspartyl-tRNA(Asn) amidotransferase subunit C (EC 6.3.5.6) @ Glutamyl-tRNA(Gln) amidotransferase subunit C (EC 6.3.5.7)
BCO26_RS13630	BCO26_2643, BCO26_RS13630, GI:503626505, WP_013860581.1	Bacillus_coagulans_2-6.RAST (77415/17/1)	gene	Isocitrate lyase (EC 4.1.3.1)
BCO26_RS13635	BCO26_2644, BCO26_RS13635, GI:503626506, WP_013860582.1	Bacillus_coagulans_2-6.RAST (77415/17/1)	gene	Malate synthase (EC 2.3.3.9)
BCO26_RS13640	BCO26_2645, BCO26_RS13640, GI:754207610, WP_041819480.1	Bacillus_coagulans_2-6.RAST (77415/17/1)	gene	Putative pheromone cAM373 precursor lipoprotein CamS
BCO26_RS13645	6.5.1.2, BCO26_RS13645, GI:754207611, WP_041819481.1, ligA	Bacillus_coagulans_2-6.RAST (77415/17/1)	gene	DNA ligase (NAD(+)) (EC 6.5.1.2)
BCO26_RS13655	BCO26_2649, BCO26_RS13655, GI:503626511, WP_013860587.1	Bacillus_coagulans_2-6.RAST (77415/17/1)	gene	ATP-dependent DNA helicase UvrD/PcrA (EC 3.6.4.12)
BCO26_RS13660	BCO26_2650, BCO26_RS13660, GI:503626512, WP_013860588.1	Bacillus_coagulans_2-6.RAST (77415/17/1)	gene	Heptaprenylglyceryl phosphate synthase (EC 2.5.1.n9)
BCO26_RS13665	BCO26_2652, BCO26_RS13665, GI:503626514, WP_013860590.1	Bacillus_coagulans_2-6.RAST (77415/17/1)	gene	His repressor
BCO26_RS01445	BCO26_0256, BCO26_RS01445, GI:754206623, WP_041818657.1	Bacillus_coagulans_2-6.RAST (77415/17/1)	gene	Mevalonate kinase (EC 2.7.1.36)
BCO26_RS13670	BCO26_2653, BCO26_RS13670, GI:503626515, WP_013860591.1	Bacillus_coagulans_2-6.RAST (77415/17/1)	gene	FIG00895120: hypothetical protein
BCO26_RS13675	BCO26_2654, BCO26_RS13675, GI:503626516, WP_013860592.1	Bacillus_coagulans_2-6.RAST (77415/17/1)	gene	Adenine deaminase (EC 3.5.4.2)
BCO26_RS13680	BCO26_2655, BCO26_RS13680, GI:503626517, WP_013860593.1	Bacillus_coagulans_2-6.RAST (77415/17/1)	gene	FIG01226624: hypothetical protein
BCO26_RS13685	BCO26_2656, BCO26_RS13685, GI:503626518, WP_013860594.1	Bacillus_coagulans_2-6.RAST (77415/17/1)	gene	Phosphoribosylamine--glycine ligase (EC 6.3.4.13)
BCO26_RS13695	BCO26_2657, BCO26_RS13695, GI:503626519, WP_013860595.1, purH	Bacillus_coagulans_2-6.RAST (77415/17/1)	gene	IMP cyclohydrolase (EC 3.5.4.10) / Phosphoribosylaminoimidazolecarboxamide formyltransferase (EC 2.1.2.3)
BCO26_RS13700	BCO26_2658, BCO26_RS13700, GI:754207616, WP_041819485.1	Bacillus_coagulans_2-6.RAST (77415/17/1)	gene	Phosphoribosylglycinamide formyltransferase (EC 2.1.2.2)
BCO26_RS13705	BCO26_2659, BCO26_RS13705, GI:503626521, WP_013860597.1	Bacillus_coagulans_2-6.RAST (77415/17/1)	gene	Phosphoribosylformylglycinamidine cyclo-ligase (EC 6.3.3.1)
BCO26_RS13710	BCO26_2660, BCO26_RS13710, GI:503626522, WP_013860598.1	Bacillus_coagulans_2-6.RAST (77415/17/1)	gene	Amidophosphoribosyltransferase (EC 2.4.2.14)
BCO26_RS13715	BCO26_2661, BCO26_RS13715, GI:503626523, WP_013860599.1	Bacillus_coagulans_2-6.RAST (77415/17/1)	gene	Phosphoribosylformylglycinamidine synthase, synthetase subunit (EC 6.3.5.3)
BCO26_RS13720	6.3.5.3, BCO26_2662, BCO26_RS13720, GI:516122393, WP_017552973.1	Bacillus_coagulans_2-6.RAST (77415/17/1)	gene	Phosphoribosylformylglycinamidine synthase, glutamine amidotransferase subunit (EC 6.3.5.3)
BCO26_RS13725	BCO26_2663, BCO26_RS13725, GI:503626525, WP_013860601.1	Bacillus_coagulans_2-6.RAST (77415/17/1)	gene	Phosphoribosylformylglycinamidine synthase, PurS subunit (EC 6.3.5.3)
BCO26_RS13730	BCO26_2664, BCO26_RS13730, GI:503626526, WP_013860602.1	Bacillus_coagulans_2-6.RAST (77415/17/1)	gene	Phosphoribosylaminoimidazole-succinocarboxamide synthase (EC 6.3.2.6)
BCO26_RS13735	BCO26_2665, BCO26_RS13735, GI:503626527, WP_013860603.1	Bacillus_coagulans_2-6.RAST (77415/17/1)	gene	Adenylosuccinate lyase (EC 4.3.2.2) @ SAICAR lyase (EC 4.3.2.2)
BCO26_RS13740	BCO26_2666, BCO26_RS13740, GI:754207619, WP_041819487.1	Bacillus_coagulans_2-6.RAST (77415/17/1)	gene	N5-carboxyaminoimidazole ribonucleotide synthase (EC 6.3.4.18)
BCO26_RS13745	BCO26_2667, BCO26_RS13745, GI:503626529, WP_013860605.1	Bacillus_coagulans_2-6.RAST (77415/17/1)	gene	N5-carboxyaminoimidazole ribonucleotide mutase (EC 5.4.99.18)
BCO26_RS13750	BCO26_2668, BCO26_RS13750, GI:503626530, WP_013860606.1	Bacillus_coagulans_2-6.RAST (77415/17/1)	gene	Uncharacterized protein YebG
BCO26_RS13755	BCO26_2669, BCO26_RS13755, GI:503626531, WP_013860607.1	Bacillus_coagulans_2-6.RAST (77415/17/1)	gene	Integral membrane protein
BCO26_RS13760	BCO26_2670, BCO26_RS13760, GI:503626532, WP_013860608.1	Bacillus_coagulans_2-6.RAST (77415/17/1)	gene	2-hydroxychromene-2-carboxylate isomerase/DsbA-like thioredoxin domain
BCO26_RS13785	BCO26_2674, BCO26_RS13785, GI:656148869, WP_029143010.1	Bacillus_coagulans_2-6.RAST (77415/17/1)	gene	Proton/sodium-glutamate symport protein
BCO26_RS13790	BCO26_2675, BCO26_RS13790, GI:503626534, WP_013860610.1	Bacillus_coagulans_2-6.RAST (77415/17/1)	gene	PTS system, beta-glucoside-specific IIB component / PTS system, beta-glucoside-specific IIC component / PTS system, beta-glucoside-specific IIA component
BCO26_RS13795	BCO26_2677, BCO26_RS13795, GI:503626536, WP_013860612.1	Bacillus_coagulans_2-6.RAST (77415/17/1)	gene	Beta-glucoside bgl operon antiterminator, BglG family
BCO26_RS13800	BCO26_2678, BCO26_RS13800, GI:503626537, WP_013860613.1	Bacillus_coagulans_2-6.RAST (77415/17/1)	gene	Xanthine/uracil/thiamine/ascorbate permease family protein
BCO26_RS13805	BCO26_2679, BCO26_RS13805, GI:503626538, WP_013860614.1	Bacillus_coagulans_2-6.RAST (77415/17/1)	gene	Threonine dehydratase biosynthetic (EC 4.3.1.19)
BCO26_RS01460	BCO26_0258, BCO26_RS01460, GI:516122633, WP_017553213.1	Bacillus_coagulans_2-6.RAST (77415/17/1)	gene	Phosphomevalonate kinase (EC 2.7.4.2)
BCO26_RS13950	BCO26_2713, BCO26_RS13950, GI:503626571, WP_013860647.1	Bacillus_coagulans_2-6.RAST (77415/17/1)	gene	transposase, IS5 family, putative
BCO26_RS00165	BCO26_0029, BCO26_RS00165, GI:516124308, WP_017554888.1	Bacillus_coagulans_2-6.RAST (77415/17/1)	gene	Small acid-soluble spore protein SspF
BCO26_RS01470	BCO26_RS01470, GI:754206629, WP_041818662.1	Bacillus_coagulans_2-6.RAST (77415/17/1)	gene	Uncharacterized sugar epimerase YhfK
BCO26_RS13975	BCO26_2716, BCO26_RS13975, GI:503626574, WP_013860650.1	Bacillus_coagulans_2-6.RAST (77415/17/1)	gene	GMP synthase [glutamine-hydrolyzing], amidotransferase subunit (EC 6.3.5.2) / GMP synthase [glutamine-hydrolyzing], ATP pyrophosphatase subunit (EC 6.3.5.2)
BCO26_RS13985	BCO26_2718, BCO26_RS13985, GI:503626576, WP_013860652.1	Bacillus_coagulans_2-6.RAST (77415/17/1)	gene	NAD synthetase (EC 6.3.1.5)
BCO26_RS13990	BCO26_2719, BCO26_RS13990, GI:503626577, WP_013860653.1	Bacillus_coagulans_2-6.RAST (77415/17/1)	gene	Nicotinate phosphoribosyltransferase (EC 6.3.4.21)
BCO26_RS13995	BCO26_RS13995, GI:754207640, WP_041819506.1	Bacillus_coagulans_2-6.RAST (77415/17/1)	gene	Nicotinamidase (EC 3.5.1.19)
BCO26_RS14000	BCO26_2720, BCO26_RS14000, GI:503626578, WP_013860654.1	Bacillus_coagulans_2-6.RAST (77415/17/1)	gene	L-alanine-DL-glutamate epimerase (EC 5.1.1.n1)
BCO26_RS14005	BCO26_2721, BCO26_RS14005, GI:503626579, WP_013860655.1	Bacillus_coagulans_2-6.RAST (77415/17/1)	gene	Uncharacterized membrane protein YkoS
BCO26_RS14015	BCO26_2723, BCO26_RS14015, GI:503626581, WP_013860657.1	Bacillus_coagulans_2-6.RAST (77415/17/1)	gene	hypothetical protein
BCO26_RS14020	BCO26_2724, BCO26_RS14020, GI:503626582, WP_013860658.1, groEL	Bacillus_coagulans_2-6.RAST (77415/17/1)	gene	Heat shock protein 60 kDa family chaperone GroEL
BCO26_RS14025	BCO26_2725, BCO26_RS14025, GI:516121869, WP_017552449.1	Bacillus_coagulans_2-6.RAST (77415/17/1)	gene	Heat shock protein 10 kDa family chaperone GroES
BCO26_RS14030	BCO26_2726, BCO26_RS14030, GI:518550585, WP_019720792.1	Bacillus_coagulans_2-6.RAST (77415/17/1)	gene	CAAX amino terminal protease family protein
BCO26_RS14040	BCO26_2728, BCO26_RS14040, GI:503626586, WP_013860662.1	Bacillus_coagulans_2-6.RAST (77415/17/1)	gene	Twin-arginine translocation protein TatC
BCO26_RS14045	BCO26_2729, BCO26_RS14045, GI:518550587, WP_019720794.1	Bacillus_coagulans_2-6.RAST (77415/17/1)	gene	Redox-sensing transcriptional repressor Rex
BCO26_RS14050	BCO26_2730, BCO26_RS14050, GI:503626588, WP_013860664.1	Bacillus_coagulans_2-6.RAST (77415/17/1)	gene	Bis-ABC ATPase YheS
BCO26_RS14060	BCO26_2731, BCO26_RS14060, GI:503626589, WP_013860665.1	Bacillus_coagulans_2-6.RAST (77415/17/1)	gene	N(6)-L-threonylcarbamoyladenine synthase (EC 2.3.1.234)
BCO26_RS14065	BCO26_2732, BCO26_RS14065, GI:503626590, WP_013860666.1	Bacillus_coagulans_2-6.RAST (77415/17/1)	gene	Ribosomal-protein-S18p-alanine acetyltransferase (EC 2.3.1.128)
BCO26_RS14070	BCO26_2733, BCO26_RS14070, GI:503626591, WP_013860667.1	Bacillus_coagulans_2-6.RAST (77415/17/1)	gene	tRNA threonylcarbamoyladenosine biosynthesis protein TsaB
BCO26_RS14075	BCO26_2734, BCO26_RS14075, GI:503626592, WP_013860668.1	Bacillus_coagulans_2-6.RAST (77415/17/1)	gene	tRNA threonylcarbamoyladenosine biosynthesis protein TsaE
BCO26_RS14140	BCO26_2738, BCO26_RS14140, GI:503626593, WP_013860669.1	Bacillus_coagulans_2-6.RAST (77415/17/1)	gene	Putative metallopeptidase (Zinc) SprT family
BCO26_RS14145	BCO26_2739, BCO26_RS14145, GI:516122704, WP_017553284.1	Bacillus_coagulans_2-6.RAST (77415/17/1)	gene	Transcription accessory protein (S1 RNA-binding domain)
BCO26_RS14150	BCO26_2740, BCO26_RS14150, GI:656148216, WP_029142784.1	Bacillus_coagulans_2-6.RAST (77415/17/1)	gene	Phosphoserine phosphatase RsbX (EC 3.1.3.3)
BCO26_RS14155	BCO26_2741, BCO26_RS14155, GI:503626596, WP_013860672.1	Bacillus_coagulans_2-6.RAST (77415/17/1)	gene	RNA polymerase sigma factor SigB
BCO26_RS14160	BCO26_2742, BCO26_RS14160, GI:503626597, WP_013860673.1	Bacillus_coagulans_2-6.RAST (77415/17/1)	gene	Serine-protein kinase RsbW (EC 2.7.11.1)
BCO26_RS14165	BCO26_2743, BCO26_RS14165, GI:503626598, WP_013860674.1	Bacillus_coagulans_2-6.RAST (77415/17/1)	gene	Anti-sigma B factor antagonist RsbV
BCO26_RS14170	BCO26_2744, BCO26_RS14170, GI:503626599, WP_013860675.1	Bacillus_coagulans_2-6.RAST (77415/17/1)	gene	Serine phosphatase RsbU, regulator of sigma subunit
BCO26_RS14175	BCO26_2745, BCO26_RS14175, GI:503626600, WP_013860676.1	Bacillus_coagulans_2-6.RAST (77415/17/1)	gene	Anti-sigma B factor RsbT
BCO26_RS14180	BCO26_RS14180, GI:516122710, WP_017553290.1	Bacillus_coagulans_2-6.RAST (77415/17/1)	gene	RsbS, negative regulator of sigma-B
BCO26_RS01485	BCO26_0263, BCO26_RS01485, GI:503624145, WP_013858221.1	Bacillus_coagulans_2-6.RAST (77415/17/1)	gene	Cystathionine beta-lyase (EC 4.4.1.8)
BCO26_RS14185	BCO26_2747, BCO26_RS14185, GI:754207646, WP_041819511.1	Bacillus_coagulans_2-6.RAST (77415/17/1)	gene	RsbT co-antagonist protein RsbRA
BCO26_RS14195	BCO26_2749, BCO26_RS14195, GI:503626604, WP_013860680.1	Bacillus_coagulans_2-6.RAST (77415/17/1)	gene	Programmed cell death toxin YdcE
BCO26_RS14200	BCO26_RS14200, GI:503862814, WP_014096808.1	Bacillus_coagulans_2-6.RAST (77415/17/1)	gene	Programmed cell death antitoxin YdcD
BCO26_RS14205	BCO26_2751, BCO26_RS14205, GI:503626606, WP_013860682.1	Bacillus_coagulans_2-6.RAST (77415/17/1)	gene	Alanine racemase (EC 5.1.1.1)
BCO26_RS14210	BCO26_2752, BCO26_RS14210, GI:503626607, WP_013860683.1	Bacillus_coagulans_2-6.RAST (77415/17/1)	gene	outer membrane lipoprotein receptor
BCO26_RS14215	BCO26_2753, BCO26_RS14215, GI:503626608, WP_013860684.1	Bacillus_coagulans_2-6.RAST (77415/17/1)	gene	Holo-[acyl-carrier-protein] synthase (EC 2.7.8.7)
BCO26_RS14220	BCO26_2754, BCO26_RS14220, GI:503626609, WP_013860685.1	Bacillus_coagulans_2-6.RAST (77415/17/1)	gene	GlpG protein (membrane protein of glp regulon)
BCO26_RS14225	BCO26_2756, BCO26_RS14225, GI:503626611, WP_013860687.1	Bacillus_coagulans_2-6.RAST (77415/17/1)	gene	DEAD-box ATP-dependent RNA helicase DeaD (= CshA) (EC 3.6.4.13)
BCO26_RS01490	BCO26_0264, BCO26_RS01490, GI:503624146, WP_013858222.1	Bacillus_coagulans_2-6.RAST (77415/17/1)	gene	hypothetical protein
BCO26_RS14235	BCO26_2757, BCO26_RS14235, GI:754207649, WP_041819513.1	Bacillus_coagulans_2-6.RAST (77415/17/1)	gene	Putative amino acid efflux protein YcgF, LysE family
BCO26_RS14240	BCO26_2759, BCO26_RS14240, GI:503626614, WP_013860690.1	Bacillus_coagulans_2-6.RAST (77415/17/1)	gene	Beta-phosphoglucomutase (EC 5.4.2.6)
BCO26_RS14245	BCO26_2760, BCO26_RS14245, GI:503626615, WP_013860691.1	Bacillus_coagulans_2-6.RAST (77415/17/1)	gene	Maltose operon transcriptional repressor MalR, LacI family
BCO26_RS14250	BCO26_2761, BCO26_RS14250, GI:503626616, WP_013860692.1	Bacillus_coagulans_2-6.RAST (77415/17/1)	gene	Oligo-1,6-glucosidase (EC 3.2.1.10)
[truncated: 16,287 more rows]

## Sheet: Non-Core
Feature Id	Aliases	Genome	Type	Function
[truncated: 7,809 more rows]
