# Supplementary material for: A Genomic Comparative Analysis of Bacillus Coagulans Unravels the Genetic Potential of MA-13 Strain for Biotechnological Applications
Source: Preprints.org preprint supplement (doi:10.20944/preprints202112.0372.v1), 2021-12-22
Supplement: Supplementary file 2 [file Table S1.xlsx]

## Sheet: Supplementary Table 1
Bacillus coagulans strain	BioSample	BioProject	Assembly	Level	Size(Mbp)	GC%	Replicons	WGS	Scaffolds	CDS	Release Date	GenBank FTP	RefSeq FTP
ATCC 7050	SAMN03120846	PRJNA238056	GCA_000832905.1	Complete	3.367	46.9	chromosome:NZ_CP009709.1/CP009709.1		1	2973	2015-02-05T00:00:00Z	ftp://ftp.ncbi.nlm.nih.gov/genomes/all/GCA/000/832/905/GCA_000832905.1_ASM83290v1	ftp://ftp.ncbi.nlm.nih.gov/genomes/all/GCF/000/832/905/GCF_000832905.1_ASM83290v1
S-lac	SAMN03754657	PRJNA285520	GCA_001039495.1	Complete	3.69484	46.2	chromosome:NZ_CP011939.1/CP011939.1		1	3237	2015-06-25T00:00:00Z	ftp://ftp.ncbi.nlm.nih.gov/genomes/all/GCA/001/039/495/GCA_001039495.1_ASM103949v1	ftp://ftp.ncbi.nlm.nih.gov/genomes/all/GCF/001/039/495/GCF_001039495.1_ASM103949v1
IDCC1201	SAMN10782594	PRJNA516085	GCA_004114715.1	Complete	3.66421	46.2	chromosome:NZ_CP035305.1/CP035305.1		1	3225	2019-01-28T00:00:00Z	ftp://ftp.ncbi.nlm.nih.gov/genomes/all/GCA/004/114/715/GCA_004114715.1_ASM411471v1	ftp://ftp.ncbi.nlm.nih.gov/genomes/all/GCF/004/114/715/GCF_004114715.1_ASM411471v1
LA204	SAMN08194889	PRJNA422690	GCA_003184245.1	Complete	3.64257	46.2	chromosome:NZ_CP025437.1/CP025437.1		1	3231	2018-06-04T00:00:00Z	ftp://ftp.ncbi.nlm.nih.gov/genomes/all/GCA/003/184/245/GCA_003184245.1_ASM318424v1	ftp://ftp.ncbi.nlm.nih.gov/genomes/all/GCF/003/184/245/GCF_003184245.1_ASM318424v1
DSM 2314	SAMN09744932	PRJNA483752	GCA_006716385.1	Complete	3.62865	46.2	chromosome:NZ_CP033687.1/CP033687.1		1	3224	2019-07-08T00:00:00Z	ftp://ftp.ncbi.nlm.nih.gov/genomes/all/GCA/006/716/385/GCA_006716385.1_ASM671638v1	ftp://ftp.ncbi.nlm.nih.gov/genomes/all/GCF/006/716/385/GCF_006716385.1_ASM671638v1
HM-08	SAMN03272539	PRJNA271049	GCA_000876545.1	Complete	3.62464	46.3	chromosome:NZ_CP010525.1/CP010525.1		1	3208	2015-02-17T00:00:00Z	ftp://ftp.ncbi.nlm.nih.gov/genomes/all/GCA/000/876/545/GCA_000876545.1_ASM87654v1	ftp://ftp.ncbi.nlm.nih.gov/genomes/all/GCF/000/876/545/GCF_000876545.1_ASM87654v1
R11	SAMN08461623	PRJNA432768	GCA_002946455.1	Complete	3.60275	46.3	chromosome:NZ_CP026649.1/CP026649.1		1	3117	2018-02-14T00:00:00Z	ftp://ftp.ncbi.nlm.nih.gov/genomes/all/GCA/002/946/455/GCA_002946455.1_ASM294645v1	ftp://ftp.ncbi.nlm.nih.gov/genomes/all/GCF/002/946/455/GCF_002946455.1_ASM294645v1
BC-HY1	SAMN05817827	PRJNA343340	GCA_001870065.1	Complete	3.59908	46.2	chromosome:NZ_CP017888.1/CP017888.1		1	3197	2016-11-07T00:00:00Z	ftp://ftp.ncbi.nlm.nih.gov/genomes/all/GCA/001/870/065/GCA_001870065.1_ASM187006v1	ftp://ftp.ncbi.nlm.nih.gov/genomes/all/GCF/001/870/065/GCF_001870065.1_ASM187006v1
BC01	SAMN16631050	PRJNA673749	GCA_015655285.1	Complete	3.56491	46.2	chromosome:NZ_CP064767.1/CP064767.1		1	3146	2020-11-23T00:00:00Z	ftp://ftp.ncbi.nlm.nih.gov/genomes/all/GCA/015/655/285/GCA_015655285.1_ASM1565528v1	ftp://ftp.ncbi.nlm.nih.gov/genomes/all/GCF/015/655/285/GCF_015655285.1_ASM1565528v1
ASRS217	SAMN15420990	PRJNA643634	GCA_013402775.1	Complete	3.51433	46.5	chromosome:NZ_CP058594.1/CP058594.1		1	3103	2020-07-12T00:00:00Z	ftp://ftp.ncbi.nlm.nih.gov/genomes/all/GCA/013/402/775/GCA_013402775.1_ASM1340277v1	ftp://ftp.ncbi.nlm.nih.gov/genomes/all/GCF/013/402/775/GCF_013402775.1_ASM1340277v1
FDAARGOS_1160	SAMN16357329	PRJNA231221	GCA_016724825.1	Complete	3.34283	47	chromosome:NZ_CP068054.1/CP068054.1		1	2911	2021-01-20T00:00:00Z	ftp://ftp.ncbi.nlm.nih.gov/genomes/all/GCA/016/724/825/GCA_016724825.1_ASM1672482v1	ftp://ftp.ncbi.nlm.nih.gov/genomes/all/GCF/016/724/825/GCF_016724825.1_ASM1672482v1
2-6	SAMN02603866	PRJNA61501	GCA_000217835.1	Complete	3.07308	47.3	chromosome:NC_015634.1/CP002472.1		1	2743	2011-06-10T00:00:00Z	ftp://ftp.ncbi.nlm.nih.gov/genomes/all/GCA/000/217/835/GCA_000217835.1_ASM21783v1	ftp://ftp.ncbi.nlm.nih.gov/genomes/all/GCF/000/217/835/GCF_000217835.1_ASM21783v1
36D1	SAMN00623030	PRJNA15679	GCA_000169195.2	Complete	3.55223	46.5	chromosome:NC_016023.1/CP003056.1		1	3128	2011-09-23T00:00:00Z	ftp://ftp.ncbi.nlm.nih.gov/genomes/all/GCA/000/169/195/GCA_000169195.2_ASM16919v2	ftp://ftp.ncbi.nlm.nih.gov/genomes/all/GCF/000/169/195/GCF_000169195.2_ASM16919v2
LBSC	SAMN07452751	PRJNA397257	GCA_002786555.1	Chromosome	3.6359	46.3	chromosome:NZ_CP022701.1/CP022701.1		1	3220	2017-11-20T00:00:00Z	ftp://ftp.ncbi.nlm.nih.gov/genomes/all/GCA/002/786/555/GCA_002786555.1_ASM278655v1	ftp://ftp.ncbi.nlm.nih.gov/genomes/all/GCF/002/786/555/GCF_002786555.1_ASM278655v1
CGD018	SAMN14646983	PRJNA626662	GCA_012851395.1	Chromosome	3.03783	47.3	chromosome:NZ_CP051674.1/CP051674.1		1	2814	2020-04-27T00:00:00Z	ftp://ftp.ncbi.nlm.nih.gov/genomes/all/GCA/012/851/395/GCA_012851395.1_ASM1285139v1	ftp://ftp.ncbi.nlm.nih.gov/genomes/all/GCF/012/851/395/GCF_012851395.1_ASM1285139v1
DSM 1	SAMN02470949	PRJNA167728	GCA_000290615.1	Contig	3.01804	47.2		ALAS01	307	2794	2012-08-16T00:00:00Z	ftp://ftp.ncbi.nlm.nih.gov/genomes/all/GCA/000/290/615/GCA_000290615.1_ASM29061v1	ftp://ftp.ncbi.nlm.nih.gov/genomes/all/GCF/000/290/615/GCF_000290615.1_ASM29061v1
DSM 1	SAMN02745208	PRJEB18146	GCA_900128875.1	Scaffold	2.95252	47.3		FQUB01	143	2756	2016-12-02T00:00:00Z	ftp://ftp.ncbi.nlm.nih.gov/genomes/all/GCA/900/128/875/GCA_900128875.1_IMG-taxon_2582581263_annotated_assembly	ftp://ftp.ncbi.nlm.nih.gov/genomes/all/GCF/900/128/875/GCF_900128875.1_IMG-taxon_2582581263_annotated_assembly
ATCC 7050	SAMN02440918	PRJNA185217	GCA_000420205.1	Contig	2.94782	47.3		ATUM01	170	2752	2013-07-09T00:00:00Z	ftp://ftp.ncbi.nlm.nih.gov/genomes/all/GCA/000/420/205/GCA_000420205.1_ASM42020v1	ftp://ftp.ncbi.nlm.nih.gov/genomes/all/GCF/000/420/205/GCF_000420205.1_ASM42020v1
ZB29	SAMN09489659	PRJNA475407	GCA_003335145.1	Scaffold	3.64647	46.2		QPFA01	18	3216	2018-07-21T00:00:00Z	ftp://ftp.ncbi.nlm.nih.gov/genomes/all/GCA/003/335/145/GCA_003335145.1_ASM333514v1	ftp://ftp.ncbi.nlm.nih.gov/genomes/all/GCF/003/335/145/GCF_003335145.1_ASM333514v1
BA375	SAMN18148111	PRJNA706917	GCA_017353475.1	Contig	3.06089	46.9		JAFMQA01	82	2785	2021-03-14T00:00:00Z	ftp://ftp.ncbi.nlm.nih.gov/genomes/all/GCA/017/353/475/GCA_017353475.1_ASM1735347v1	ftp://ftp.ncbi.nlm.nih.gov/genomes/all/GCF/017/353/475/GCF_017353475.1_ASM1735347v1
CGI314	SAMN14667374	PRJNA627304	GCA_012910695.1	Contig	3.45535	46.3		JABBFU01	106	3112	2020-04-27T00:00:00Z	ftp://ftp.ncbi.nlm.nih.gov/genomes/all/GCA/012/910/695/GCA_012910695.1_ASM1291069v1	ftp://ftp.ncbi.nlm.nih.gov/genomes/all/GCF/012/910/695/GCF_012910695.1_ASM1291069v1
NL01	SAMN03570054	PRJNA282439	GCA_000988585.1	Contig	3.50142	46.2		LBMQ01	141	3187	2015-05-06T00:00:00Z	ftp://ftp.ncbi.nlm.nih.gov/genomes/all/GCA/000/988/585/GCA_000988585.1_ASM98858v1	ftp://ftp.ncbi.nlm.nih.gov/genomes/all/GCF/000/988/585/GCF_000988585.1_ASM98858v1
LSBC-1	SAMN13228352	PRJNA588133	GCA_010820925.1	Contig	3.47124	46.4		WMBS01	119	3117	2020-02-20T00:00:00Z	ftp://ftp.ncbi.nlm.nih.gov/genomes/all/GCA/010/820/925/GCA_010820925.1_ASM1082092v1	ftp://ftp.ncbi.nlm.nih.gov/genomes/all/GCF/010/820/925/GCF_010820925.1_ASM1082092v1
AF24-19	SAMN09734463	PRJNA482748	GCA_003459195.1	Scaffold	2.9104	47.4		QRUW01	103	2677	2018-09-05T00:00:00Z	ftp://ftp.ncbi.nlm.nih.gov/genomes/all/GCA/003/459/195/GCA_003459195.1_ASM345919v1	ftp://ftp.ncbi.nlm.nih.gov/genomes/all/GCF/003/459/195/GCF_003459195.1_ASM345919v1
MGYG-HGUT-00191	SAMEA5849693	PRJEB33885	GCA_902364135.1	Scaffold	2.9104	47.4		CABJCT01	103	2680	2019-08-16T00:00:00Z	ftp://ftp.ncbi.nlm.nih.gov/genomes/all/GCA/902/364/135/GCA_902364135.1_MGYG-HGUT-00191	ftp://ftp.ncbi.nlm.nih.gov/genomes/all/GCF/902/364/135/GCF_902364135.1_MGYG-HGUT-00191
BSD2780061689_150309_A3	SAMN15532558	PRJNA637878	GCA_015547595.1	Scaffold	3.45182	46.4		JADMVL01	122	3135	2020-11-17T00:00:00Z	ftp://ftp.ncbi.nlm.nih.gov/genomes/all/GCA/015/547/595/GCA_015547595.1_ASM1554759v1	ftp://ftp.ncbi.nlm.nih.gov/genomes/all/GCF/015/547/595/GCF_015547595.1_ASM1554759v1
AF24-21	SAMN09734469	PRJNA482748	GCA_003459145.1	Scaffold	2.89159	47.5		QRUS01	94	2666	2018-09-05T00:00:00Z	ftp://ftp.ncbi.nlm.nih.gov/genomes/all/GCA/003/459/145/GCA_003459145.1_ASM345914v1	ftp://ftp.ncbi.nlm.nih.gov/genomes/all/GCF/003/459/145/GCF_003459145.1_ASM345914v1
MA-13	SAMN11105967	PRJNA526660	GCA_004359975.2	Contig	2.94217	47.2		SMSP02	116	2657	2019-03-22T00:00:00Z	ftp://ftp.ncbi.nlm.nih.gov/genomes/all/GCA/004/359/975/GCA_004359975.2_ASM435997v2	ftp://ftp.ncbi.nlm.nih.gov/genomes/all/GCF/004/359/975/GCF_004359975.2_ASM435997v2
Unique IS-2	SAMN03377049	PRJNA276508	GCA_001578455.1	Contig	3.44669	46.4		JZDH01	143	3156	2016-03-02T00:00:00Z	ftp://ftp.ncbi.nlm.nih.gov/genomes/all/GCA/001/578/455/GCA_001578455.1_ASM157845v1	ftp://ftp.ncbi.nlm.nih.gov/genomes/all/GCF/001/578/455/GCF_001578455.1_ASM157845v1
DS39_15	SAMN15078709	PRJNA336518	GCA_018603675.1	Contig	3.35294	46.5		JAHFZS01	175	3048	2021-05-31T00:00:00Z	ftp://ftp.ncbi.nlm.nih.gov/genomes/all/GCA/018/603/675/GCA_018603675.1_ASM1860367v1	ftp://ftp.ncbi.nlm.nih.gov/genomes/all/GCF/018/603/675/GCF_018603675.1_ASM1860367v1
DS16_15	SAMN06464119	PRJNA336518	GCA_018603695.1	Contig	3.36181	46.5		JAHFZU01	171	3063	2021-05-31T00:00:00Z	ftp://ftp.ncbi.nlm.nih.gov/genomes/all/GCA/018/603/695/GCA_018603695.1_ASM1860369v1	ftp://ftp.ncbi.nlm.nih.gov/genomes/all/GCF/018/603/695/GCF_018603695.1_ASM1860369v1
GBI-30, 6086	SAMN02905869	PRJNA254940	GCA_000756285.1	Contig	3.45862	46.4		JPSK01	224	3147	2014-09-19T00:00:00Z	ftp://ftp.ncbi.nlm.nih.gov/genomes/all/GCA/000/756/285/GCA_000756285.1_ASM75628v1	ftp://ftp.ncbi.nlm.nih.gov/genomes/all/GCF/000/756/285/GCF_000756285.1_ASM75628v1
B4100	SAMN03267279	PRJNA270593	GCA_001587205.1	Scaffold	3.42452	46.5		LQYH01	124	3117	2016-03-11T00:00:00Z	ftp://ftp.ncbi.nlm.nih.gov/genomes/all/GCA/001/587/205/GCA_001587205.1_B4100	ftp://ftp.ncbi.nlm.nih.gov/genomes/all/GCF/001/587/205/GCF_001587205.1_B4100
GED7749B	SAMN03842165	PRJNA272105	GCA_001546215.1	Scaffold	3.31243	46.5		LRPN01	156	3041	2016-02-02T00:00:00Z	ftp://ftp.ncbi.nlm.nih.gov/genomes/all/GCA/001/546/215/GCA_001546215.1_ASM154621v1	ftp://ftp.ncbi.nlm.nih.gov/genomes/all/GCF/001/546/215/GCF_001546215.1_ASM154621v1
B4098	SAMN03267277	PRJNA270593	GCA_001587225.1	Scaffold	2.9287	47.4		LQYG01	124	2688	2016-03-11T00:00:00Z	ftp://ftp.ncbi.nlm.nih.gov/genomes/all/GCA/001/587/225/GCA_001587225.1_B4098	ftp://ftp.ncbi.nlm.nih.gov/genomes/all/GCF/001/587/225/GCF_001587225.1_B4098
B4096	SAMN03267276	PRJNA270593	GCA_001587275.1	Scaffold	3.3136	46.5		LQYJ01	184	2994	2016-03-11T00:00:00Z	ftp://ftp.ncbi.nlm.nih.gov/genomes/all/GCA/001/587/275/GCA_001587275.1_B4096	ftp://ftp.ncbi.nlm.nih.gov/genomes/all/GCF/001/587/275/GCF_001587275.1_B4096
CICC 20138	SAMN13880678	PRJNA602050	GCA_009936615.1	Contig	3.38643	46.7		JAABON01	216	2986	2020-01-27T00:00:00Z	ftp://ftp.ncbi.nlm.nih.gov/genomes/all/GCA/009/936/615/GCA_009936615.1_ASM993661v1	ftp://ftp.ncbi.nlm.nih.gov/genomes/all/GCF/009/936/615/GCF_009936615.1_ASM993661v1
B4099	SAMN03267278	PRJNA270593	GCA_001587215.1	Scaffold	3.27533	47.1		LQYI01	202	2989	2016-03-11T00:00:00Z	ftp://ftp.ncbi.nlm.nih.gov/genomes/all/GCA/001/587/215/GCA_001587215.1_B4099	ftp://ftp.ncbi.nlm.nih.gov/genomes/all/GCF/001/587/215/GCF_001587215.1_B4099
XZL9	SAMN02470944	PRJNA177891	GCA_000333915.1	Contig	3.42411	46.5		ANAP01	232	3137	2013-01-25T00:00:00Z	ftp://ftp.ncbi.nlm.nih.gov/genomes/all/GCA/000/333/915/GCA_000333915.1_XZL9_v1	ftp://ftp.ncbi.nlm.nih.gov/genomes/all/GCF/000/333/915/GCF_000333915.1_XZL9_v1
P38	SAMN03159544	PRJNA218161	GCA_000773655.1	Contig	3.37432	46.4		JSVI01	137	3098	2014-11-07T00:00:00Z	ftp://ftp.ncbi.nlm.nih.gov/genomes/all/GCA/000/773/655/GCA_000773655.1_P38-1	ftp://ftp.ncbi.nlm.nih.gov/genomes/all/GCF/000/773/655/GCF_000773655.1_P38-1
CSIL1	SAMN02441436	PRJNA190861	GCA_000482605.1	Scaffold	3.46623	46.3		AXVW01	116	3165	2013-10-25T00:00:00Z	ftp://ftp.ncbi.nlm.nih.gov/genomes/all/GCA/000/482/605/GCA_000482605.1_ASM48260v1	ftp://ftp.ncbi.nlm.nih.gov/genomes/all/GCF/000/482/605/GCF_000482605.1_ASM48260v1
XZL4	SAMN02470953	PRJNA71045	GCA_000223155.1	Scaffold	2.86628	47.4		AFWM01	123	2571	2011-08-10T00:00:00Z	ftp://ftp.ncbi.nlm.nih.gov/genomes/all/GCA/000/223/155/GCA_000223155.1_ASM22315v1	ftp://ftp.ncbi.nlm.nih.gov/genomes/all/GCF/000/223/155/GCF_000223155.1_ASM22315v1
H-1	SAMN02470963	PRJNA176246	GCA_000333935.1	Contig	2.86288	47.3		ANAQ01	377	2555	2013-01-25T00:00:00Z	ftp://ftp.ncbi.nlm.nih.gov/genomes/all/GCA/000/333/935/GCA_000333935.1_H1_v1	ftp://ftp.ncbi.nlm.nih.gov/genomes/all/GCF/000/333/935/GCF_000333935.1_H1_v1
HS243	SAMN06909301	PRJNA385743	GCA_002266595.1	Contig	3.4563	46.4		NFZN01	150	2864	2017-08-23T00:00:00Z	ftp://ftp.ncbi.nlm.nih.gov/genomes/all/GCA/002/266/595/GCA_002266595.1_ASM226659v1	ftp://ftp.ncbi.nlm.nih.gov/genomes/all/GCF/002/266/595/GCF_002266595.1_ASM226659v1
RUG14133	SAMEA6152271	PRJEB31266	GCA_902796085.1	Contig	3.3052	34.6		CADBNU01	497	0	2020-02-10T00:00:00Z	ftp://ftp.ncbi.nlm.nih.gov/genomes/all/GCA/902/796/085/GCA_902796085.1_Rumen_uncultured_genome_RUG14133	ftp://ftp.ncbi.nlm.nih.gov/genomes/all/GCF/902/796/085/GCF_902796085.1_Rumen_uncultured_genome_RUG14133
	S1. A list of the genomic features of B. coagulans strains. For most of the strains several assembly stages are present reflecting that the completeness and accuracy of genomes annotation is different.
