# Supplementary material for: A Genomic Comparative Analysis of Bacillus Coagulans Unravels the Genetic Potential of MA-13 Strain for Biotechnological Applications
Source: Preprints.org preprint supplement (doi:10.20944/preprints202112.0372.v1), 2021-12-22
Supplement: Supplementary file 4 [file Table S3.xlsx]

## Sheet: non-core
Tab. S3 A complete list of non-core, core and singletons of MA-13
Feature Id	Aliases	Genome	Type	Function
E2E33_000060	E2E33_000060, MBF8416803.1	MA-13_genebank.gb_genome (77415/14/1)	gene	IS1380 family transposase
E2E33_000065	E2E33_000065, MBF8416804.1	MA-13_genebank.gb_genome (77415/14/1)	gene	ABC transporter ATP-binding protein
E2E33_000070	E2E33_000070, MBF8416805.1	MA-13_genebank.gb_genome (77415/14/1)	gene	ABC transporter permease
E2E33_000075	E2E33_000075, MBF8416806.1	MA-13_genebank.gb_genome (77415/14/1)	gene	LlsX family protein
E2E33_000080	E2E33_000080, MBF8416807.1	MA-13_genebank.gb_genome (77415/14/1)	gene	streptolysin associated protein SagB
E2E33_000120	E2E33_000120, MBF8416814.1	MA-13_genebank.gb_genome (77415/14/1)	gene	hypothetical protein
E2E33_000135	E2E33_000135, MBF8416815.1	MA-13_genebank.gb_genome (77415/14/1)	gene	radical SAM protein
E2E33_000140	E2E33_000140, MBF8416816.1	MA-13_genebank.gb_genome (77415/14/1)	gene	superoxide dismutase
E2E33_000200	E2E33_000200, MBF8416827.1	MA-13_genebank.gb_genome (77415/14/1)	gene	cold-shock protein
E2E33_000205	E2E33_000205, MBF8416828.1	MA-13_genebank.gb_genome (77415/14/1)	gene	beta-ketoacyl synthase
E2E33_000210	E2E33_000210, MBF8416829.1	MA-13_genebank.gb_genome (77415/14/1)	gene	HAMP domain-containing histidine kinase
E2E33_000215	E2E33_000215, MBF8416830.1	MA-13_genebank.gb_genome (77415/14/1)	gene	ABC transporter ATP-binding protein
E2E33_000220	E2E33_000220, MBF8416831.1	MA-13_genebank.gb_genome (77415/14/1)	gene	copper resistance protein CopC
E2E33_000225	E2E33_000225, MBF8416832.1	MA-13_genebank.gb_genome (77415/14/1)	gene	DUF1775 domain-containing protein
E2E33_000235	4.1.2.4, E2E33_000235, MBF8416834.1, deoC	MA-13_genebank.gb_genome (77415/14/1)	gene	deoxyribose-phosphate aldolase
E2E33_000250	E2E33_000250, MBF8416837.1	MA-13_genebank.gb_genome (77415/14/1)	gene	stage III sporulation protein AH
E2E33_000290	E2E33_000290, MBF8416843.1	MA-13_genebank.gb_genome (77415/14/1)	gene	GntR family transcriptional regulator
E2E33_000295	E2E33_000295, MBF8416844.1	MA-13_genebank.gb_genome (77415/14/1)	gene	ABC transporter ATP-binding protein
E2E33_000300	E2E33_000300, MBF8416845.1	MA-13_genebank.gb_genome (77415/14/1)	gene	hypothetical protein
E2E33_000305	E2E33_000305, MBF8416846.1	MA-13_genebank.gb_genome (77415/14/1)	gene	hypothetical protein
E2E33_000310	E2E33_000310, MBF8416847.1	MA-13_genebank.gb_genome (77415/14/1)	gene	hypothetical protein
E2E33_000315	E2E33_000315, MBF8416848.1	MA-13_genebank.gb_genome (77415/14/1)	gene	DASS family sodium-coupled anion symporter
E2E33_000410	E2E33_000410, MBF8416864.1	MA-13_genebank.gb_genome (77415/14/1)	gene	hypothetical protein
E2E33_000415	E2E33_000415, MBF8416865.1	MA-13_genebank.gb_genome (77415/14/1)	gene	hypothetical protein
E2E33_000480	E2E33_000480, MBF8416877.1	MA-13_genebank.gb_genome (77415/14/1)	gene	hypothetical protein
E2E33_000520	E2E33_000520, MBF8416885.1	MA-13_genebank.gb_genome (77415/14/1)	gene	MFS transporter
E2E33_000540	E2E33_000540, MBF8416889.1	MA-13_genebank.gb_genome (77415/14/1)	gene	hypothetical protein
E2E33_000570	E2E33_000570, MBF8416894.1	MA-13_genebank.gb_genome (77415/14/1)	gene	SH3 domain-containing protein
E2E33_000575	E2E33_000575, MBF8416895.1	MA-13_genebank.gb_genome (77415/14/1)	gene	NAD(P)H-dependent oxidoreductase
E2E33_000550	E2E33_000550, MBF8416890.1	MA-13_genebank.gb_genome (77415/14/1)	gene	class I SAM-dependent methyltransferase
E2E33_000565	E2E33_000565, MBF8416893.1	MA-13_genebank.gb_genome (77415/14/1)	gene	glycosyltransferase
E2E33_000620	E2E33_000620, MBF8416902.1	MA-13_genebank.gb_genome (77415/14/1)	gene	hypothetical protein
E2E33_000630	E2E33_000630, MBF8416904.1, opuFA	MA-13_genebank.gb_genome (77415/14/1)	gene	osmoprotectant update ABC transporter ATP-binding subunit OpuFA
E2E33_000635	E2E33_000635, MBF8416905.1, opuFB	MA-13_genebank.gb_genome (77415/14/1)	gene	osmoprotectant update ABC transporter permease/substrate-binding subunit OpuFB
E2E33_000650	E2E33_000650, MBF8416908.1	MA-13_genebank.gb_genome (77415/14/1)	gene	hypothetical protein
E2E33_000660	E2E33_000660, MBF8416910.1	MA-13_genebank.gb_genome (77415/14/1)	gene	hypothetical protein
E2E33_000670	4.1.1.33, E2E33_000670, MBF8416912.1, mvaD	MA-13_genebank.gb_genome (77415/14/1)	gene	diphosphomevalonate decarboxylase
E2E33_000690	E2E33_000690, MBF8416916.1	MA-13_genebank.gb_genome (77415/14/1)	gene	hypothetical protein
E2E33_000730	E2E33_000730, MBF8416924.1	MA-13_genebank.gb_genome (77415/14/1)	gene	YozE family protein
E2E33_000740	E2E33_000740, MBF8416926.1	MA-13_genebank.gb_genome (77415/14/1)	gene	YjcZ family sporulation protein
E2E33_000820	E2E33_000820, MBF8416938.1	MA-13_genebank.gb_genome (77415/14/1)	gene	transposase
E2E33_000825	E2E33_000825, MBF8416939.1	MA-13_genebank.gb_genome (77415/14/1)	gene	putative sulfate exporter family transporter
E2E33_000830	E2E33_000830, MBF8416940.1	MA-13_genebank.gb_genome (77415/14/1)	gene	universal stress protein
E2E33_000835	E2E33_000835, MBF8416941.1	MA-13_genebank.gb_genome (77415/14/1)	gene	transposase
E2E33_000850	E2E33_000850, MBF8416942.1	MA-13_genebank.gb_genome (77415/14/1)	gene	hypothetical protein
E2E33_000855	E2E33_000855, MBF8416943.1	MA-13_genebank.gb_genome (77415/14/1)	gene	TrkA family potassium uptake protein
E2E33_000865	E2E33_000865, MBF8416944.1	MA-13_genebank.gb_genome (77415/14/1)	gene	iron ABC transporter permease
E2E33_000870	E2E33_000870, MBF8416945.1	MA-13_genebank.gb_genome (77415/14/1)	gene	ABC transporter ATP-binding protein
E2E33_000880	E2E33_000880, MBF8416946.1	MA-13_genebank.gb_genome (77415/14/1)	gene	transposase
E2E33_000890	E2E33_000890, MBF8416947.1	MA-13_genebank.gb_genome (77415/14/1)	gene	YbxH family protein
E2E33_000895	E2E33_000895, MBF8416948.1	MA-13_genebank.gb_genome (77415/14/1)	gene	IS110 family transposase
E2E33_000900	E2E33_000900, MBF8416949.1	MA-13_genebank.gb_genome (77415/14/1)	gene	DNA-binding protein
E2E33_000905	E2E33_000905, MBF8416950.1	MA-13_genebank.gb_genome (77415/14/1)	gene	SDR family oxidoreductase
E2E33_000910	E2E33_000910, MBF8416951.1	MA-13_genebank.gb_genome (77415/14/1)	gene	AGE family epimerase/isomerase
E2E33_000915	E2E33_000915, MBF8416952.1	MA-13_genebank.gb_genome (77415/14/1)	gene	YeeE/YedE family protein
E2E33_000920	E2E33_000920, MBF8416953.1	MA-13_genebank.gb_genome (77415/14/1)	gene	sulfurtransferase TusA family protein
E2E33_000925	E2E33_000925, MBF8416954.1	MA-13_genebank.gb_genome (77415/14/1)	gene	Rpn family recombination-promoting nuclease/putative transposase
E2E33_000930	E2E33_000930, MBF8416955.1	MA-13_genebank.gb_genome (77415/14/1)	gene	MFS transporter
E2E33_000935	E2E33_000935, MBF8416956.1	MA-13_genebank.gb_genome (77415/14/1)	gene	ABC transporter ATP-binding protein
E2E33_000975	5.4.3.8, E2E33_000975, MBF8416963.1	MA-13_genebank.gb_genome (77415/14/1)	gene	glutamate-1-semialdehyde 2,1-aminomutase
E2E33_000995	E2E33_000995, MBF8416967.1	MA-13_genebank.gb_genome (77415/14/1)	gene	Crp/Fnr family transcriptional regulator
E2E33_001000	E2E33_001000, MBF8416968.1	MA-13_genebank.gb_genome (77415/14/1)	gene	LysR family transcriptional regulator
E2E33_001030	E2E33_001030, MBF8416973.1	MA-13_genebank.gb_genome (77415/14/1)	gene	flagellin
E2E33_001055	E2E33_001055, MBF8416978.1, flgK	MA-13_genebank.gb_genome (77415/14/1)	gene	flagellar hook-associated protein FlgK
E2E33_001080	E2E33_001080, MBF8416983.1	MA-13_genebank.gb_genome (77415/14/1)	gene	DEAD/DEAH box helicase
E2E33_001120	E2E33_001120, MBF8416991.1	MA-13_genebank.gb_genome (77415/14/1)	gene	chemotaxis protein
E2E33_001125	E2E33_001125, MBF8416992.1	MA-13_genebank.gb_genome (77415/14/1)	gene	LysM peptidoglycan-binding domain-containing protein
E2E33_001135	E2E33_001135, MBF8416993.1	MA-13_genebank.gb_genome (77415/14/1)	gene	helix-turn-helix transcriptional regulator
E2E33_001155	E2E33_001155, MBF8416995.1	MA-13_genebank.gb_genome (77415/14/1)	gene	methyl-accepting chemotaxis protein
E2E33_001160	E2E33_001160, MBF8416996.1	MA-13_genebank.gb_genome (77415/14/1)	gene	PadR family transcriptional regulator
E2E33_001165	E2E33_001165, MBF8416997.1	MA-13_genebank.gb_genome (77415/14/1)	gene	DUF1700 domain-containing protein
E2E33_001170	E2E33_001170, MBF8416998.1	MA-13_genebank.gb_genome (77415/14/1)	gene	DUF4097 family beta strand repeat protein
E2E33_001175	E2E33_001175, MBF8416999.1	MA-13_genebank.gb_genome (77415/14/1)	gene	CZB domain-containing protein
E2E33_001180	E2E33_001180, MBF8417000.1	MA-13_genebank.gb_genome (77415/14/1)	gene	NAD-dependent protein deacylase
E2E33_001185	E2E33_001185	MA-13_genebank.gb_genome (77415/14/1)	gene	MFS transporter
E2E33_001190	E2E33_001190, MBF8417001.1	MA-13_genebank.gb_genome (77415/14/1)	gene	MFS transporter
E2E33_001195	E2E33_001195, MBF8417002.1	MA-13_genebank.gb_genome (77415/14/1)	gene	acyl-ACP thioesterase
E2E33_001200	E2E33_001200, MBF8417003.1	MA-13_genebank.gb_genome (77415/14/1)	gene	ClbS/DfsB family four-helix bundle protein
E2E33_001205	E2E33_001205, MBF8417004.1	MA-13_genebank.gb_genome (77415/14/1)	gene	S8 family serine peptidase
E2E33_001265	E2E33_001265, MBF8417016.1	MA-13_genebank.gb_genome (77415/14/1)	gene	carbon starvation protein A
E2E33_001275	E2E33_001275, MBF8417018.1	MA-13_genebank.gb_genome (77415/14/1)	gene	threonine/serine exporter family protein
E2E33_001285	E2E33_001285, MBF8417020.1	MA-13_genebank.gb_genome (77415/14/1)	gene	histidine phosphatase family protein
E2E33_001290	E2E33_001290, MBF8417021.1	MA-13_genebank.gb_genome (77415/14/1)	gene	DUF4352 domain-containing protein
E2E33_001295	E2E33_001295, MBF8417022.1	MA-13_genebank.gb_genome (77415/14/1)	gene	YcxB family protein
E2E33_001300	E2E33_001300, MBF8417023.1	MA-13_genebank.gb_genome (77415/14/1)	gene	hypothetical protein
E2E33_001305	E2E33_001305, MBF8417024.1	MA-13_genebank.gb_genome (77415/14/1)	gene	maltose-6'-phosphate glucosidase
E2E33_001325	E2E33_001325, MBF8417028.1	MA-13_genebank.gb_genome (77415/14/1)	gene	hypothetical protein
E2E33_001360	3.1.21.3, E2E33_001360, MBF8417035.1, hsdR	MA-13_genebank.gb_genome (77415/14/1)	gene	type I restriction-modification system endonuclease
E2E33_001365	E2E33_001365, MBF8417036.1	MA-13_genebank.gb_genome (77415/14/1)	gene	N-6 DNA methylase
E2E33_001370	E2E33_001370, MBF8417037.1	MA-13_genebank.gb_genome (77415/14/1)	gene	restriction endonuclease subunit S
E2E33_001375	E2E33_001375, MBF8417038.1	MA-13_genebank.gb_genome (77415/14/1)	gene	sigma 54-interacting transcriptional regulator
E2E33_001380	E2E33_001380, MBF8417039.1	MA-13_genebank.gb_genome (77415/14/1)	gene	ornithine--oxo-acid transaminase
E2E33_001510	E2E33_001510, MBF8417065.1	MA-13_genebank.gb_genome (77415/14/1)	gene	APC family permease
E2E33_001535	E2E33_001535, MBF8417070.1	MA-13_genebank.gb_genome (77415/14/1)	gene	hypothetical protein
E2E33_001560	E2E33_001560, MBF8417075.1	MA-13_genebank.gb_genome (77415/14/1)	gene	DUF1648 domain-containing protein
E2E33_001565	E2E33_001565, MBF8417076.1	MA-13_genebank.gb_genome (77415/14/1)	gene	ABC transporter ATP-binding protein
E2E33_001570	E2E33_001570, MBF8417077.1	MA-13_genebank.gb_genome (77415/14/1)	gene	stage II sporulation protein M
E2E33_001575	E2E33_001575, MBF8417078.1	MA-13_genebank.gb_genome (77415/14/1)	gene	hypothetical protein
E2E33_001580	E2E33_001580, MBF8417079.1	MA-13_genebank.gb_genome (77415/14/1)	gene	uberolysin/carnocyclin family circular bacteriocin
E2E33_001635	3.1.3.11, E2E33_001635, MBF8417089.1, glpX	MA-13_genebank.gb_genome (77415/14/1)	gene	class II fructose-bisphosphatase
E2E33_001685	2.7.7.6, E2E33_001685, MBF8417099.1, rpoE	MA-13_genebank.gb_genome (77415/14/1)	gene	DNA-directed RNA polymerase subunit delta
E2E33_001690	E2E33_001690, MBF8417100.1	MA-13_genebank.gb_genome (77415/14/1)	gene	VanZ family protein
E2E33_001700	E2E33_001700, MBF8417102.1	MA-13_genebank.gb_genome (77415/14/1)	gene	ABC transporter ATP-binding protein
E2E33_001715	E2E33_001715, MBF8417103.1	MA-13_genebank.gb_genome (77415/14/1)	gene	hypothetical protein
E2E33_001750	E2E33_001750, MBF8417108.1	MA-13_genebank.gb_genome (77415/14/1)	gene	PTS transporter subunit EIIC
E2E33_001765	E2E33_001765, MBF8417111.1, ctaF	MA-13_genebank.gb_genome (77415/14/1)	gene	cytochrome c oxidase subunit IVB
E2E33_001770	E2E33_001770, MBF8417112.1	MA-13_genebank.gb_genome (77415/14/1)	gene	cytochrome (ubi)quinol oxidase subunit III
E2E33_001780	E2E33_001780, MBF8417114.1, coxB	MA-13_genebank.gb_genome (77415/14/1)	gene	cytochrome c oxidase subunit II
E2E33_001810	E2E33_001810, MBF8417120.1	MA-13_genebank.gb_genome (77415/14/1)	gene	hypothetical protein
E2E33_001815	E2E33_001815, MBF8417121.1	MA-13_genebank.gb_genome (77415/14/1)	gene	hypothetical protein
E2E33_001835	E2E33_001835, MBF8417123.1	MA-13_genebank.gb_genome (77415/14/1)	gene	glycosyltransferase family 2 protein
E2E33_001840	E2E33_001840, MBF8417124.1	MA-13_genebank.gb_genome (77415/14/1)	gene	hypothetical protein
E2E33_001850	E2E33_001850, MBF8417125.1	MA-13_genebank.gb_genome (77415/14/1)	gene	hypothetical protein
E2E33_001970	3.1.3.16, E2E33_001970, MBF8417146.1, spoIIE	MA-13_genebank.gb_genome (77415/14/1)	gene	stage II sporulation protein E
E2E33_001995	E2E33_001995, MBF8417151.1, ftsH	MA-13_genebank.gb_genome (77415/14/1)	gene	ATP-dependent zinc metalloprotease FtsH
E2E33_002005	E2E33_002005, MBF8417153.1, hslO	MA-13_genebank.gb_genome (77415/14/1)	gene	Hsp33 family molecular chaperone HslO
E2E33_002065	2.1.1.190, E2E33_002065, MBF8417164.1, rlmD	MA-13_genebank.gb_genome (77415/14/1)	gene	23S rRNA (uracil(1939)-C(5))-methyltransferase RlmD
E2E33_002080	E2E33_002080, MBF8417167.1	MA-13_genebank.gb_genome (77415/14/1)	gene	amino acid transporter
E2E33_002095	E2E33_002095, MBF8417170.1	MA-13_genebank.gb_genome (77415/14/1)	gene	kinase
E2E33_002100	E2E33_002100, MBF8417171.1	MA-13_genebank.gb_genome (77415/14/1)	gene	PH domain-containing protein
E2E33_002125	E2E33_002125, MBF8417176.1	MA-13_genebank.gb_genome (77415/14/1)	gene	DUF2975 domain-containing protein
E2E33_002130	E2E33_002130, MBF8417177.1	MA-13_genebank.gb_genome (77415/14/1)	gene	helix-turn-helix transcriptional regulator
E2E33_002135	E2E33_002135, MBF8417178.1	MA-13_genebank.gb_genome (77415/14/1)	gene	DUF817 domain-containing protein
E2E33_002140	E2E33_002140, MBF8417179.1	MA-13_genebank.gb_genome (77415/14/1)	gene	methyl-accepting chemotaxis protein
E2E33_002145	E2E33_002145, MBF8417180.1	MA-13_genebank.gb_genome (77415/14/1)	gene	TIGR02677 family protein
E2E33_002150	E2E33_002150, MBF8417181.1	MA-13_genebank.gb_genome (77415/14/1)	gene	TIGR02678 family protein
E2E33_002155	E2E33_002155, MBF8417182.1	MA-13_genebank.gb_genome (77415/14/1)	gene	TIGR02680 family protein
E2E33_002160	E2E33_002160, MBF8417183.1	MA-13_genebank.gb_genome (77415/14/1)	gene	TIGR02679 family protein
E2E33_002175	E2E33_002175, MBF8417185.1	MA-13_genebank.gb_genome (77415/14/1)	gene	ABC transporter ATP-binding protein
E2E33_002180	E2E33_002180, MBF8417186.1	MA-13_genebank.gb_genome (77415/14/1)	gene	sugar ABC transporter permease
E2E33_002185	E2E33_002185, MBF8417187.1	MA-13_genebank.gb_genome (77415/14/1)	gene	carbohydrate ABC transporter permease
E2E33_002190	E2E33_002190, MBF8417188.1	MA-13_genebank.gb_genome (77415/14/1)	gene	extracellular solute-binding protein
E2E33_002195	E2E33_002195, MBF8417189.1	MA-13_genebank.gb_genome (77415/14/1)	gene	glycerophosphodiester phosphodiesterase
E2E33_002210	E2E33_002210, MBF8417191.1	MA-13_genebank.gb_genome (77415/14/1)	gene	winged helix-turn-helix transcriptional regulator
E2E33_002215	E2E33_002215, MBF8417192.1, arsB	MA-13_genebank.gb_genome (77415/14/1)	gene	ACR3 family arsenite efflux transporter
E2E33_002220	1.20.4.4, E2E33_002220, MBF8417193.1, arsC	MA-13_genebank.gb_genome (77415/14/1)	gene	arsenate reductase (thioredoxin)
E2E33_002225	E2E33_002225, MBF8417194.1, arsD	MA-13_genebank.gb_genome (77415/14/1)	gene	arsenite efflux transporter metallochaperone ArsD
E2E33_002230	E2E33_002230, MBF8417195.1, arsA	MA-13_genebank.gb_genome (77415/14/1)	gene	arsenical pump-driving ATPase
E2E33_002235	E2E33_002235, MBF8417196.1	MA-13_genebank.gb_genome (77415/14/1)	gene	SDR family oxidoreductase
E2E33_002250	3.2.1.26, E2E33_002250, MBF8417199.1	MA-13_genebank.gb_genome (77415/14/1)	gene	sucrose-6-phosphate hydrolase
E2E33_002295	E2E33_002295, MBF8417205.1	MA-13_genebank.gb_genome (77415/14/1)	gene	hypothetical protein
E2E33_002305	E2E33_002305, MBF8417207.1	MA-13_genebank.gb_genome (77415/14/1)	gene	multidrug resistance efflux transporter family protein
E2E33_002315	E2E33_002315, MBF8417209.1	MA-13_genebank.gb_genome (77415/14/1)	gene	alpha-ketoacid dehydrogenase subunit beta
E2E33_002330	E2E33_002330, MBF8417212.1	MA-13_genebank.gb_genome (77415/14/1)	gene	sigma-54-dependent Fis family transcriptional regulator
E2E33_002345	E2E33_002345, MBF8417215.1	MA-13_genebank.gb_genome (77415/14/1)	gene	SCP2 sterol-binding domain-containing protein
E2E33_002415	E2E33_002415, MBF8417228.1	MA-13_genebank.gb_genome (77415/14/1)	gene	ABC transporter ATP-binding protein
E2E33_002490	1.1.5.4, E2E33_002490, MBF8417241.1	MA-13_genebank.gb_genome (77415/14/1)	gene	malate:quinone oxidoreductase
E2E33_002500	E2E33_002500, MBF8417242.1	MA-13_genebank.gb_genome (77415/14/1)	gene	ABC transporter ATP-binding protein
E2E33_002505	E2E33_002505, MBF8417243.1	MA-13_genebank.gb_genome (77415/14/1)	gene	ABC transporter permease
E2E33_002515	E2E33_002515, MBF8417244.1	MA-13_genebank.gb_genome (77415/14/1)	gene	response regulator transcription factor
E2E33_002540	E2E33_002540, MBF8417249.1	MA-13_genebank.gb_genome (77415/14/1)	gene	two-component system regulatory protein YycI
E2E33_002570	E2E33_002570, MBF8417253.1	MA-13_genebank.gb_genome (77415/14/1)	gene	IS256 family transposase
E2E33_002585	E2E33_002585, MBF8417256.1	MA-13_genebank.gb_genome (77415/14/1)	gene	flippase
E2E33_002590	5.4.99.9, E2E33_002590, MBF8417257.1, glf	MA-13_genebank.gb_genome (77415/14/1)	gene	UDP-galactopyranose mutase
E2E33_002595	E2E33_002595, MBF8417258.1	MA-13_genebank.gb_genome (77415/14/1)	gene	glycosyltransferase family 2 protein
E2E33_002600	E2E33_002600, MBF8417259.1	MA-13_genebank.gb_genome (77415/14/1)	gene	cupin domain-containing protein
E2E33_002605	E2E33_002605, MBF8417260.1	MA-13_genebank.gb_genome (77415/14/1)	gene	glycosyltransferase family 4 protein
E2E33_002610	E2E33_002610, MBF8417261.1	MA-13_genebank.gb_genome (77415/14/1)	gene	glycosyltransferase family 4 protein
E2E33_002615	E2E33_002615, MBF8417262.1	MA-13_genebank.gb_genome (77415/14/1)	gene	glycosyltransferase family 4 protein
E2E33_002670	1.5.1.20, 2.1.1.10, E2E33_002670, MBF8417272.1	MA-13_genebank.gb_genome (77415/14/1)	gene	bifunctional homocysteine S-methyltransferase/methylenetetrahydrofolate reductase
E2E33_002680	E2E33_002680, MBF8417274.1	MA-13_genebank.gb_genome (77415/14/1)	gene	hypothetical protein
E2E33_002700	2.7.7.49, E2E33_002700, MBF8417278.1, ltrA	MA-13_genebank.gb_genome (77415/14/1)	gene	group II intron reverse transcriptase/maturase
E2E33_002705	E2E33_002705, MBF8417279.1	MA-13_genebank.gb_genome (77415/14/1)	gene	LacI family DNA-binding transcriptional regulator
E2E33_002740	E2E33_002740, MBF8417286.1	MA-13_genebank.gb_genome (77415/14/1)	gene	glycosyltransferase family 2 protein
E2E33_002765	E2E33_002765, MBF8417291.1	MA-13_genebank.gb_genome (77415/14/1)	gene	YdiK family protein
E2E33_002815	E2E33_002815, MBF8417299.1	MA-13_genebank.gb_genome (77415/14/1)	gene	hypothetical protein
E2E33_002890	E2E33_002890, MBF8417314.1	MA-13_genebank.gb_genome (77415/14/1)	gene	hypothetical protein
E2E33_002905	E2E33_002905, MBF8417317.1, tnpA	MA-13_genebank.gb_genome (77415/14/1)	gene	IS200/IS605 family transposase
E2E33_002910	E2E33_002910, MBF8417318.1	MA-13_genebank.gb_genome (77415/14/1)	gene	hypothetical protein
E2E33_002970	6.3.5.7, E2E33_002970, MBF8417329.1, gatA	MA-13_genebank.gb_genome (77415/14/1)	gene	Asp-tRNA(Asn)/Glu-tRNA(Gln) amidotransferase subunit GatA
E2E33_003090	E2E33_003090, MBF8417351.1, secDF	MA-13_genebank.gb_genome (77415/14/1)	gene	protein translocase subunit SecDF
E2E33_003135	E2E33_003135, MBF8417360.1	MA-13_genebank.gb_genome (77415/14/1)	gene	CDP-glycerol glycerophosphotransferase family protein
E2E33_003345	E2E33_003345, MBF8417399.1	MA-13_genebank.gb_genome (77415/14/1)	gene	enoyl-CoA hydratase/isomerase family protein
E2E33_003400	E2E33_003400, MBF8417410.1	MA-13_genebank.gb_genome (77415/14/1)	gene	undecaprenyl-diphosphatase
E2E33_003440	E2E33_003440	MA-13_genebank.gb_genome (77415/14/1)	gene	glycoside hydrolase family 25 protein
E2E33_003465	E2E33_003465, MBF8417422.1	MA-13_genebank.gb_genome (77415/14/1)	gene	cytochrome c biogenesis protein ResB
E2E33_003655	E2E33_003655, MBF8417460.1	MA-13_genebank.gb_genome (77415/14/1)	gene	SHOCT domain-containing protein
E2E33_003660	1.8.1.14, E2E33_003660, MBF8417461.1	MA-13_genebank.gb_genome (77415/14/1)	gene	CoA-disulfide reductase
E2E33_003665	E2E33_003665, MBF8417462.1	MA-13_genebank.gb_genome (77415/14/1)	gene	rhodanese-like domain-containing protein
E2E33_003670	E2E33_003670, MBF8417463.1	MA-13_genebank.gb_genome (77415/14/1)	gene	glutaredoxin family protein
E2E33_003675	E2E33_003675, MBF8417464.1	MA-13_genebank.gb_genome (77415/14/1)	gene	DsrE/DsrF/DrsH-like family protein
E2E33_003680	E2E33_003680, MBF8417465.1	MA-13_genebank.gb_genome (77415/14/1)	gene	Hsp20/alpha crystallin family protein
E2E33_003705	E2E33_003705, MBF8417470.1	MA-13_genebank.gb_genome (77415/14/1)	gene	pre-peptidase C-terminal domain-containing protein
E2E33_003715	E2E33_003715, MBF8417472.1	MA-13_genebank.gb_genome (77415/14/1)	gene	hypothetical protein
E2E33_003720	E2E33_003720, MBF8417473.1, cas7c	MA-13_genebank.gb_genome (77415/14/1)	gene	type I-C CRISPR-associated protein Cas7/Csd2
E2E33_003725	E2E33_003725, MBF8417474.1, cas8c	MA-13_genebank.gb_genome (77415/14/1)	gene	type I-C CRISPR-associated protein Cas8c/Csd1
E2E33_003730	E2E33_003730, MBF8417475.1, cas5c	MA-13_genebank.gb_genome (77415/14/1)	gene	type I-C CRISPR-associated protein Cas5
E2E33_003735	E2E33_003735, MBF8417476.1, cas3	MA-13_genebank.gb_genome (77415/14/1)	gene	CRISPR-associated helicase Cas3'
E2E33_003740	E2E33_003740, MBF8417477.1	MA-13_genebank.gb_genome (77415/14/1)	gene	DUF3006 domain-containing protein
E2E33_003745	E2E33_003745, MBF8417478.1	MA-13_genebank.gb_genome (77415/14/1)	gene	MBL fold metallo-hydrolase
E2E33_003750	E2E33_003750, MBF8417479.1	MA-13_genebank.gb_genome (77415/14/1)	gene	DUF1648 domain-containing protein
E2E33_003760	E2E33_003760, MBF8417480.1	MA-13_genebank.gb_genome (77415/14/1)	gene	nitronate monooxygenase
E2E33_003770	E2E33_003770, MBF8417481.1	MA-13_genebank.gb_genome (77415/14/1)	gene	DNA-binding protein
E2E33_003775	E2E33_003775, MBF8417482.1	MA-13_genebank.gb_genome (77415/14/1)	gene	HipA domain-containing protein
E2E33_003780	E2E33_003780, MBF8417483.1	MA-13_genebank.gb_genome (77415/14/1)	gene	dextransucrase
E2E33_003790	E2E33_003790, MBF8417485.1	MA-13_genebank.gb_genome (77415/14/1)	gene	type Z 30S ribosomal protein S14
E2E33_003795	E2E33_003795, MBF8417486.1	MA-13_genebank.gb_genome (77415/14/1)	gene	ATP-dependent helicase
E2E33_003820	3.5.1.5, E2E33_003820, MBF8417491.1	MA-13_genebank.gb_genome (77415/14/1)	gene	urease subunit gamma
E2E33_003825	3.5.1.5, E2E33_003825, MBF8417492.1	MA-13_genebank.gb_genome (77415/14/1)	gene	urease subunit beta
E2E33_003830	3.5.1.5, E2E33_003830, MBF8417493.1, ureC	MA-13_genebank.gb_genome (77415/14/1)	gene	urease subunit alpha
E2E33_003835	E2E33_003835, MBF8417494.1, ureE	MA-13_genebank.gb_genome (77415/14/1)	gene	urease accessory protein UreE
E2E33_003840	E2E33_003840, MBF8417495.1	MA-13_genebank.gb_genome (77415/14/1)	gene	urease accessory protein UreF
E2E33_003845	E2E33_003845, MBF8417496.1, ureG	MA-13_genebank.gb_genome (77415/14/1)	gene	urease accessory protein UreG
E2E33_003850	E2E33_003850, MBF8417497.1	MA-13_genebank.gb_genome (77415/14/1)	gene	urease accessory protein UreD
E2E33_003855	E2E33_003855, MBF8417498.1	MA-13_genebank.gb_genome (77415/14/1)	gene	sulfite exporter TauE/SafE family protein
E2E33_003880	2.6.1.19, E2E33_003880, MBF8417503.1, gabT	MA-13_genebank.gb_genome (77415/14/1)	gene	4-aminobutyrate--2-oxoglutarate transaminase
E2E33_003885	E2E33_003885, MBF8417504.1	MA-13_genebank.gb_genome (77415/14/1)	gene	GTP pyrophosphokinase family protein
E2E33_003940	E2E33_003940, MBF8417514.1	MA-13_genebank.gb_genome (77415/14/1)	gene	glycerol dehydrogenase
E2E33_003950	E2E33_003950, MBF8417516.1	MA-13_genebank.gb_genome (77415/14/1)	gene	PTS sugar transporter subunit IIA
E2E33_003990	E2E33_003990, MBF8417523.1, cas3	MA-13_genebank.gb_genome (77415/14/1)	gene	CRISPR-associated helicase Cas3'
E2E33_003995	E2E33_003995, MBF8417524.1, cas5c	MA-13_genebank.gb_genome (77415/14/1)	gene	type I-C CRISPR-associated protein Cas5
E2E33_004000	E2E33_004000, MBF8417525.1, cas8c	MA-13_genebank.gb_genome (77415/14/1)	gene	type I-C CRISPR-associated protein Cas8c/Csd1
E2E33_004005	E2E33_004005, MBF8417526.1, cas7c	MA-13_genebank.gb_genome (77415/14/1)	gene	type I-C CRISPR-associated protein Cas7/Csd2
E2E33_004010	E2E33_004010, MBF8417527.1, cas4	MA-13_genebank.gb_genome (77415/14/1)	gene	CRISPR-associated protein Cas4
E2E33_004015	E2E33_004015, MBF8417528.1, cas1c	MA-13_genebank.gb_genome (77415/14/1)	gene	type I-C CRISPR-associated endonuclease Cas1
E2E33_004020	E2E33_004020, MBF8417529.1, cas2	MA-13_genebank.gb_genome (77415/14/1)	gene	CRISPR-associated endonuclease Cas2
E2E33_004025	E2E33_004025, MBF8417530.1	MA-13_genebank.gb_genome (77415/14/1)	gene	ATP-binding protein
E2E33_004030	E2E33_004030, MBF8417531.1	MA-13_genebank.gb_genome (77415/14/1)	gene	IS21 family transposase
E2E33_004040	2.8.1.6, E2E33_004040, MBF8417532.1, bioB	MA-13_genebank.gb_genome (77415/14/1)	gene	biotin synthase BioB
E2E33_004045	E2E33_004045, MBF8417533.1	MA-13_genebank.gb_genome (77415/14/1)	gene	transposase
E2E33_004050	E2E33_004050, MBF8417534.1	MA-13_genebank.gb_genome (77415/14/1)	gene	YcxB family protein
E2E33_004055	E2E33_004055, MBF8417535.1	MA-13_genebank.gb_genome (77415/14/1)	gene	hypothetical protein
E2E33_004065	E2E33_004065, MBF8417536.1	MA-13_genebank.gb_genome (77415/14/1)	gene	MurR/RpiR family transcriptional regulator
E2E33_004100	E2E33_004100, MBF8417542.1	MA-13_genebank.gb_genome (77415/14/1)	gene	N-acetylmuramoyl-L-alanine amidase
E2E33_004140	E2E33_004140, MBF8417549.1, mreB	MA-13_genebank.gb_genome (77415/14/1)	gene	rod shape-determining protein MreB
E2E33_004180	E2E33_004180, MBF8417557.1, motB	MA-13_genebank.gb_genome (77415/14/1)	gene	flagellar motor protein MotB
E2E33_004245	E2E33_004245, MBF8417568.1	MA-13_genebank.gb_genome (77415/14/1)	gene	spore coat protein
E2E33_004250	E2E33_004250, MBF8417569.1	MA-13_genebank.gb_genome (77415/14/1)	gene	spore coat protein
E2E33_004265	E2E33_004265, MBF8417572.1	MA-13_genebank.gb_genome (77415/14/1)	gene	GDYXXLXY domain-containing protein
E2E33_004270	E2E33_004270, MBF8417573.1	MA-13_genebank.gb_genome (77415/14/1)	gene	DUF2157 domain-containing protein
E2E33_004275	E2E33_004275, MBF8417574.1	MA-13_genebank.gb_genome (77415/14/1)	gene	DUF1648 domain-containing protein
E2E33_004355	E2E33_004355, MBF8417590.1, polX	MA-13_genebank.gb_genome (77415/14/1)	gene	DNA polymerase/3'-5' exonuclease PolX
E2E33_004360	E2E33_004360, MBF8417591.1	MA-13_genebank.gb_genome (77415/14/1)	gene	CvpA family protein
E2E33_004375	E2E33_004375, MBF8417594.1	MA-13_genebank.gb_genome (77415/14/1)	gene	MerR family transcriptional regulator
E2E33_004380	E2E33_004380, MBF8417595.1	MA-13_genebank.gb_genome (77415/14/1)	gene	polysaccharide biosynthesis C-terminal domain-containing protein
E2E33_004395	E2E33_004395, MBF8417598.1	MA-13_genebank.gb_genome (77415/14/1)	gene	IS1380-like element ISBco1 family transposase
E2E33_004400	E2E33_004400, MBF8417599.1	MA-13_genebank.gb_genome (77415/14/1)	gene	helix-turn-helix transcriptional regulator
E2E33_004505	2.3.1.9, E2E33_004505, MBF8417620.1	MA-13_genebank.gb_genome (77415/14/1)	gene	acetyl-CoA C-acetyltransferase
E2E33_004510	E2E33_004510, MBF8417621.1	MA-13_genebank.gb_genome (77415/14/1)	gene	acyl-CoA dehydrogenase
E2E33_004515	E2E33_004515, MBF8417622.1	MA-13_genebank.gb_genome (77415/14/1)	gene	acyl-CoA dehydrogenase
E2E33_004700	E2E33_004700, MBF8417656.1	MA-13_genebank.gb_genome (77415/14/1)	gene	methyl-accepting chemotaxis protein
E2E33_004705	E2E33_004705, MBF8417657.1	MA-13_genebank.gb_genome (77415/14/1)	gene	glycogen/starch/alpha-glucan phosphorylase
E2E33_004785	E2E33_004785, MBF8417672.1	MA-13_genebank.gb_genome (77415/14/1)	gene	glutamate synthase subunit beta
E2E33_004825	E2E33_004825, MBF8417680.1, ctaG	MA-13_genebank.gb_genome (77415/14/1)	gene	cytochrome c oxidase assembly factor CtaG
E2E33_004830	E2E33_004830, MBF8417681.1	MA-13_genebank.gb_genome (77415/14/1)	gene	hypothetical protein
E2E33_004860	E2E33_004860, MBF8417687.1	MA-13_genebank.gb_genome (77415/14/1)	gene	IS256 family transposase
E2E33_004890	E2E33_004890, MBF8417691.1	MA-13_genebank.gb_genome (77415/14/1)	gene	hypothetical protein
E2E33_004910	E2E33_004910, MBF8417695.1	MA-13_genebank.gb_genome (77415/14/1)	gene	MFS transporter
E2E33_004920	E2E33_004920, MBF8417697.1	MA-13_genebank.gb_genome (77415/14/1)	gene	HAD family phosphatase
E2E33_005230	E2E33_005230, MBF8417757.1	MA-13_genebank.gb_genome (77415/14/1)	gene	lactate dehydrogenase
E2E33_004945	E2E33_004945, MBF8417701.1	MA-13_genebank.gb_genome (77415/14/1)	gene	YlaH-like family protein
E2E33_005160	E2E33_005160, MBF8417743.1	MA-13_genebank.gb_genome (77415/14/1)	gene	PAS domain S-box protein
E2E33_005245	E2E33_005245, MBF8417759.1	MA-13_genebank.gb_genome (77415/14/1)	gene	DUF421 domain-containing protein
E2E33_005250	E2E33_005250, MBF8417760.1	MA-13_genebank.gb_genome (77415/14/1)	gene	DUF1657 domain-containing protein
E2E33_005255	E2E33_005255, MBF8417761.1, spoVAD	MA-13_genebank.gb_genome (77415/14/1)	gene	stage V sporulation protein AD
E2E33_005260	E2E33_005260, MBF8417762.1	MA-13_genebank.gb_genome (77415/14/1)	gene	DUF1657 domain-containing protein
E2E33_005280	E2E33_005280, MBF8417764.1	MA-13_genebank.gb_genome (77415/14/1)	gene	amidohydrolase
E2E33_005305	E2E33_005305, MBF8417767.1	MA-13_genebank.gb_genome (77415/14/1)	gene	DUF2933 domain-containing protein
E2E33_005310	E2E33_005310, MBF8417768.1	MA-13_genebank.gb_genome (77415/14/1)	gene	hypothetical protein
E2E33_005315	E2E33_005315, MBF8417769.1	MA-13_genebank.gb_genome (77415/14/1)	gene	HAMP domain-containing histidine kinase
E2E33_005320	E2E33_005320, MBF8417770.1	MA-13_genebank.gb_genome (77415/14/1)	gene	response regulator transcription factor
E2E33_005325	E2E33_005325, MBF8417771.1	MA-13_genebank.gb_genome (77415/14/1)	gene	YdhK family protein
E2E33_005440	E2E33_005440, MBF8417787.1	MA-13_genebank.gb_genome (77415/14/1)	gene	carbamoyl phosphate synthase small subunit
E2E33_005465	2.6.1.83, E2E33_005465, MBF8417792.1	MA-13_genebank.gb_genome (77415/14/1)	gene	LL-diaminopimelate aminotransferase
E2E33_005560	E2E33_005560, MBF8417809.1	MA-13_genebank.gb_genome (77415/14/1)	gene	dehydratase
E2E33_005605	E2E33_005605, MBF8417817.1	MA-13_genebank.gb_genome (77415/14/1)	gene	DNA starvation/stationary phase protection protein
E2E33_005635	E2E33_005635, MBF8417823.1	MA-13_genebank.gb_genome (77415/14/1)	gene	glycoside hydrolase family 15
E2E33_005640	2.4.1.18, E2E33_005640, MBF8417824.1, glgB	MA-13_genebank.gb_genome (77415/14/1)	gene	1,4-alpha-glucan branching protein GlgB
E2E33_005660	E2E33_005660, MBF8417828.1	MA-13_genebank.gb_genome (77415/14/1)	gene	NAD(P)-dependent oxidoreductase
E2E33_005665	3.1.11.2, E2E33_005665, MBF8417829.1, xth	MA-13_genebank.gb_genome (77415/14/1)	gene	exodeoxyribonuclease III
E2E33_005685	E2E33_005685, MBF8417832.1	MA-13_genebank.gb_genome (77415/14/1)	gene	hypothetical protein
E2E33_005695	E2E33_005695, MBF8417833.1	MA-13_genebank.gb_genome (77415/14/1)	gene	transposase
E2E33_005705	E2E33_005705, MBF8417835.1, rnr	MA-13_genebank.gb_genome (77415/14/1)	gene	ribonuclease R
E2E33_005760	E2E33_005760, MBF8417846.1	MA-13_genebank.gb_genome (77415/14/1)	gene	heavy-metal-associated domain-containing protein
E2E33_005765	E2E33_005765, MBF8417847.1	MA-13_genebank.gb_genome (77415/14/1)	gene	DUF1641 domain-containing protein
E2E33_005775	E2E33_005775, MBF8417849.1	MA-13_genebank.gb_genome (77415/14/1)	gene	hypothetical protein
E2E33_005910	E2E33_005910, MBF8417875.1	MA-13_genebank.gb_genome (77415/14/1)	gene	hypothetical protein
E2E33_005925	1.17.99.6, E2E33_005925, MBF8417878.1, queG	MA-13_genebank.gb_genome (77415/14/1)	gene	tRNA epoxyqueuosine(34) reductase QueG
E2E33_005965	E2E33_005965, MBF8417885.1	MA-13_genebank.gb_genome (77415/14/1)	gene	DUF2705 family protein
E2E33_005995	E2E33_005995, MBF8417891.1	MA-13_genebank.gb_genome (77415/14/1)	gene	ABC transporter ATP-binding protein
E2E33_006095	E2E33_006095, MBF8417909.1	MA-13_genebank.gb_genome (77415/14/1)	gene	DUF5105 domain-containing protein
E2E33_006100	E2E33_006100, MBF8417910.1	MA-13_genebank.gb_genome (77415/14/1)	gene	hypothetical protein
E2E33_006165	E2E33_006165, MBF8417922.1, hflX	MA-13_genebank.gb_genome (77415/14/1)	gene	GTPase HflX
E2E33_006235	E2E33_006235, MBF8417935.1	MA-13_genebank.gb_genome (77415/14/1)	gene	cytochrome ubiquinol oxidase subunit I
E2E33_006250	E2E33_006250, MBF8417938.1	MA-13_genebank.gb_genome (77415/14/1)	gene	helix-turn-helix transcriptional regulator
E2E33_006255	E2E33_006255, MBF8417939.1	MA-13_genebank.gb_genome (77415/14/1)	gene	acyl-CoA--6-aminopenicillanic acid acyltransferase
E2E33_006300	E2E33_006300, MBF8417948.1	MA-13_genebank.gb_genome (77415/14/1)	gene	hypothetical protein
E2E33_006560	E2E33_006560, MBF8418000.1	MA-13_genebank.gb_genome (77415/14/1)	gene	NYN domain-containing protein
E2E33_006635	E2E33_006635, MBF8418014.1	MA-13_genebank.gb_genome (77415/14/1)	gene	CPBP family intramembrane metalloprotease
E2E33_006640	E2E33_006640, MBF8418015.1	MA-13_genebank.gb_genome (77415/14/1)	gene	YcaO-like family protein
E2E33_006645	E2E33_006645, MBF8418016.1	MA-13_genebank.gb_genome (77415/14/1)	gene	bacteriocin biosynthesis cyclodehydratase
E2E33_006655	1.1.1.35, E2E33_006655, MBF8418017.1	MA-13_genebank.gb_genome (77415/14/1)	gene	3-hydroxyacyl-CoA dehydrogenase
E2E33_006670	E2E33_006670, MBF8418020.1	MA-13_genebank.gb_genome (77415/14/1)	gene	helix-turn-helix transcriptional regulator
E2E33_006680	E2E33_006680, MBF8418022.1	MA-13_genebank.gb_genome (77415/14/1)	gene	hypothetical protein
E2E33_006705	E2E33_006705, MBF8418026.1	MA-13_genebank.gb_genome (77415/14/1)	gene	Cof-type HAD-IIB family hydrolase
E2E33_006710	E2E33_006710, MBF8418027.1	MA-13_genebank.gb_genome (77415/14/1)	gene	SIS domain-containing protein
E2E33_006715	E2E33_006715, MBF8418028.1	MA-13_genebank.gb_genome (77415/14/1)	gene	LacI family DNA-binding transcriptional regulator
E2E33_006720	E2E33_006720, MBF8418029.1	MA-13_genebank.gb_genome (77415/14/1)	gene	MFS transporter
E2E33_006730	E2E33_006730, MBF8418031.1	MA-13_genebank.gb_genome (77415/14/1)	gene	hypothetical protein
E2E33_006745	E2E33_006745, MBF8418034.1	MA-13_genebank.gb_genome (77415/14/1)	gene	polysaccharide biosynthesis protein
E2E33_006865	3.5.1.4, E2E33_006865, MBF8418057.1	MA-13_genebank.gb_genome (77415/14/1)	gene	amidase
E2E33_006880	4.2.1.79, E2E33_006880, MBF8418060.1, prpD	MA-13_genebank.gb_genome (77415/14/1)	gene	2-methylcitrate dehydratase
E2E33_006885	E2E33_006885, MBF8418061.1, mmgD	MA-13_genebank.gb_genome (77415/14/1)	gene	citrate synthase
E2E33_006890	E2E33_006890, MBF8418062.1	MA-13_genebank.gb_genome (77415/14/1)	gene	DUF956 family protein
E2E33_006895	E2E33_006895, MBF8418063.1	MA-13_genebank.gb_genome (77415/14/1)	gene	PTS mannose/fructose/sorbose transporter family subunit IID
E2E33_006900	E2E33_006900, MBF8418064.1	MA-13_genebank.gb_genome (77415/14/1)	gene	PTS mannose/fructose/sorbose transporter subunit IIC
E2E33_006925	1.5.3.2, E2E33_006925, MBF8418067.1, solA	MA-13_genebank.gb_genome (77415/14/1)	gene	N-methyl-L-tryptophan oxidase
E2E33_006930	E2E33_006930, MBF8418068.1	MA-13_genebank.gb_genome (77415/14/1)	gene	FAD-binding oxidoreductase
E2E33_006935	E2E33_006935, MBF8418069.1	MA-13_genebank.gb_genome (77415/14/1)	gene	aldehyde dehydrogenase family protein
E2E33_006940	E2E33_006940, MBF8418070.1	MA-13_genebank.gb_genome (77415/14/1)	gene	ornithine cyclodeaminase family protein
E2E33_006980	E2E33_006980, MBF8418076.1	MA-13_genebank.gb_genome (77415/14/1)	gene	helix-turn-helix transcriptional regulator
E2E33_007015	E2E33_007015, MBF8418083.1	MA-13_genebank.gb_genome (77415/14/1)	gene	DUF4391 domain-containing protein
E2E33_007020	E2E33_007020, MBF8418084.1	MA-13_genebank.gb_genome (77415/14/1)	gene	site-specific DNA-methyltransferase
E2E33_007025	E2E33_007025, MBF8418085.1	MA-13_genebank.gb_genome (77415/14/1)	gene	DEAD/DEAH box helicase family protein
E2E33_007050	E2E33_007050, MBF8418089.1	MA-13_genebank.gb_genome (77415/14/1)	gene	hypothetical protein
E2E33_007080	E2E33_007080, MBF8418095.1	MA-13_genebank.gb_genome (77415/14/1)	gene	3D domain-containing protein
E2E33_007090	E2E33_007090, MBF8418096.1	MA-13_genebank.gb_genome (77415/14/1)	gene	IS1634 family transposase
E2E33_007100	4.2.1.46, E2E33_007100, MBF8418097.1, rfbB	MA-13_genebank.gb_genome (77415/14/1)	gene	dTDP-glucose 4,6-dehydratase
E2E33_007110	E2E33_007110, MBF8418099.1	MA-13_genebank.gb_genome (77415/14/1)	gene	LD-carboxypeptidase
E2E33_007125	E2E33_007125, MBF8418100.1	MA-13_genebank.gb_genome (77415/14/1)	gene	hypothetical protein
E2E33_007130	E2E33_007130, MBF8418101.1	MA-13_genebank.gb_genome (77415/14/1)	gene	hypothetical protein
E2E33_007135	E2E33_007135, MBF8418102.1	MA-13_genebank.gb_genome (77415/14/1)	gene	hypothetical protein
E2E33_007165	E2E33_007165, MBF8418106.1	MA-13_genebank.gb_genome (77415/14/1)	gene	phosphotransferase family protein
E2E33_007175	E2E33_007175, MBF8418107.1	MA-13_genebank.gb_genome (77415/14/1)	gene	TetR family transcriptional regulator
E2E33_007185	E2E33_007185, MBF8418109.1	MA-13_genebank.gb_genome (77415/14/1)	gene	SDR family oxidoreductase
E2E33_007190	E2E33_007190, MBF8418110.1	MA-13_genebank.gb_genome (77415/14/1)	gene	acyl-CoA dehydrogenase
E2E33_007255	E2E33_007255, MBF8418123.1	MA-13_genebank.gb_genome (77415/14/1)	gene	PaaI family thioesterase
E2E33_007260	E2E33_007260, MBF8418124.1	MA-13_genebank.gb_genome (77415/14/1)	gene	hypothetical protein
E2E33_007265	E2E33_007265, MBF8418125.1	MA-13_genebank.gb_genome (77415/14/1)	gene	hypothetical protein
E2E33_007270	E2E33_007270, MBF8418126.1	MA-13_genebank.gb_genome (77415/14/1)	gene	Rpn family recombination-promoting nuclease/putative transposase
E2E33_007275	E2E33_007275, MBF8418127.1	MA-13_genebank.gb_genome (77415/14/1)	gene	sigma-70 family RNA polymerase sigma factor
E2E33_007285	E2E33_007285, MBF8418129.1	MA-13_genebank.gb_genome (77415/14/1)	gene	hypothetical protein
E2E33_007320	E2E33_007320, MBF8418136.1	MA-13_genebank.gb_genome (77415/14/1)	gene	DUF2231 domain-containing protein
E2E33_007325	E2E33_007325, MBF8418137.1	MA-13_genebank.gb_genome (77415/14/1)	gene	response regulator transcription factor
E2E33_007330	E2E33_007330, MBF8418138.1	MA-13_genebank.gb_genome (77415/14/1)	gene	two-component sensor histidine kinase
E2E33_007445	E2E33_007445, MBF8418161.1, mltG	MA-13_genebank.gb_genome (77415/14/1)	gene	endolytic transglycosylase MltG
E2E33_007500	E2E33_007500, MBF8418172.1, sigK	MA-13_genebank.gb_genome (77415/14/1)	gene	RNA polymerase sporulation sigma factor SigK
E2E33_007505	2.7.8.8, E2E33_007505, MBF8418173.1, pssA	MA-13_genebank.gb_genome (77415/14/1)	gene	CDP-diacylglycerol--serine O-phosphatidyltransferase
E2E33_007520	E2E33_007520, MBF8418176.1	MA-13_genebank.gb_genome (77415/14/1)	gene	VIT1/CCC1 transporter family protein
E2E33_007525	E2E33_007525, MBF8418177.1, crcB	MA-13_genebank.gb_genome (77415/14/1)	gene	fluoride efflux transporter CrcB
E2E33_007530	E2E33_007530, MBF8418178.1, crcB	MA-13_genebank.gb_genome (77415/14/1)	gene	fluoride efflux transporter CrcB
E2E33_007535	E2E33_007535, MBF8418179.1	MA-13_genebank.gb_genome (77415/14/1)	gene	LemA family protein
E2E33_007540	E2E33_007540, MBF8418180.1	MA-13_genebank.gb_genome (77415/14/1)	gene	TPM domain-containing protein
E2E33_007545	E2E33_007545, MBF8418181.1	MA-13_genebank.gb_genome (77415/14/1)	gene	TlpA family protein disulfide reductase
E2E33_007550	E2E33_007550, MBF8418182.1	MA-13_genebank.gb_genome (77415/14/1)	gene	SHOCT domain-containing protein
E2E33_007555	E2E33_007555, MBF8418183.1	MA-13_genebank.gb_genome (77415/14/1)	gene	Hsp20/alpha crystallin family protein
E2E33_007605	E2E33_007605, MBF8418192.1	MA-13_genebank.gb_genome (77415/14/1)	gene	phosphatase PAP2 family protein
E2E33_007630	E2E33_007630, MBF8418197.1	MA-13_genebank.gb_genome (77415/14/1)	gene	HAMP domain-containing protein
E2E33_007640	1.2.4.2, E2E33_007640, MBF8418199.1	MA-13_genebank.gb_genome (77415/14/1)	gene	2-oxoglutarate dehydrogenase E1 component
E2E33_007670	E2E33_007670, MBF8418205.1	MA-13_genebank.gb_genome (77415/14/1)	gene	YitT family protein
E2E33_007705	E2E33_007705, MBF8418211.1	MA-13_genebank.gb_genome (77415/14/1)	gene	FAD-dependent oxidoreductase
E2E33_007785	E2E33_007785, MBF8418227.1, rarD	MA-13_genebank.gb_genome (77415/14/1)	gene	EamA family transporter RarD
E2E33_007790	E2E33_007790, MBF8418228.1	MA-13_genebank.gb_genome (77415/14/1)	gene	ATPase
E2E33_007795	E2E33_007795, MBF8418229.1	MA-13_genebank.gb_genome (77415/14/1)	gene	TrkA family potassium uptake protein
E2E33_007815	E2E33_007815, MBF8418233.1	MA-13_genebank.gb_genome (77415/14/1)	gene	MFS transporter
E2E33_007820	E2E33_007820, MBF8418234.1	MA-13_genebank.gb_genome (77415/14/1)	gene	AarF/ABC1/UbiB kinase family protein
E2E33_007830	1.8.4.11, E2E33_007830, MBF8418236.1, msrA	MA-13_genebank.gb_genome (77415/14/1)	gene	peptide-methionine (S)-S-oxide reductase MsrA
E2E33_007885	E2E33_007885, MBF8418247.1	MA-13_genebank.gb_genome (77415/14/1)	gene	polysaccharide pyruvyl transferase family protein
E2E33_007895	E2E33_007895, MBF8418249.1	MA-13_genebank.gb_genome (77415/14/1)	gene	amino acid permease
E2E33_007900	E2E33_007900, MBF8418250.1	MA-13_genebank.gb_genome (77415/14/1)	gene	DUF3900 domain-containing protein
E2E33_007905	E2E33_007905, MBF8418251.1	MA-13_genebank.gb_genome (77415/14/1)	gene	hypothetical protein
E2E33_007915	E2E33_007915, MBF8418253.1	MA-13_genebank.gb_genome (77415/14/1)	gene	iron-sulfur cluster assembly accessory protein
E2E33_007920	E2E33_007920, MBF8418254.1	MA-13_genebank.gb_genome (77415/14/1)	gene	ABC transporter ATP-binding protein
E2E33_007925	E2E33_007925, MBF8418255.1	MA-13_genebank.gb_genome (77415/14/1)	gene	ABC transporter ATP-binding protein
E2E33_008050	2.7.9.1, E2E33_008050, MBF8418279.1	MA-13_genebank.gb_genome (77415/14/1)	gene	pyruvate, phosphate dikinase
E2E33_008070	E2E33_008070, MBF8418282.1	MA-13_genebank.gb_genome (77415/14/1)	gene	hypothetical protein
E2E33_008150	E2E33_008150, MBF8418298.1, ypdA	MA-13_genebank.gb_genome (77415/14/1)	gene	YpdA family putative bacillithiol disulfide reductase
E2E33_008165	E2E33_008165, MBF8418301.1, ypeB	MA-13_genebank.gb_genome (77415/14/1)	gene	germination protein YpeB
E2E33_008210	E2E33_008210, MBF8418310.1	MA-13_genebank.gb_genome (77415/14/1)	gene	hypothetical protein
E2E33_008225	E2E33_008225, MBF8418313.1, mtrB	MA-13_genebank.gb_genome (77415/14/1)	gene	trp RNA-binding attenuation protein MtrB
E2E33_008235	2.1.1.163, E2E33_008235, MBF8418315.1	MA-13_genebank.gb_genome (77415/14/1)	gene	demethylmenaquinone methyltransferase
E2E33_008270	2.6.1.9, E2E33_008270, MBF8418322.1	MA-13_genebank.gb_genome (77415/14/1)	gene	histidinol-phosphate transaminase
E2E33_008275	1.3.1.12, E2E33_008275, MBF8418323.1	MA-13_genebank.gb_genome (77415/14/1)	gene	prephenate dehydrogenase
E2E33_008300	E2E33_008300, MBF8418328.1	MA-13_genebank.gb_genome (77415/14/1)	gene	ubiquinol-cytochrome c reductase iron-sulfur subunit
E2E33_008305	E2E33_008305, MBF8418329.1	MA-13_genebank.gb_genome (77415/14/1)	gene	cytochrome b6
E2E33_008310	E2E33_008310, MBF8418330.1	MA-13_genebank.gb_genome (77415/14/1)	gene	c-type cytochrome
E2E33_008325	E2E33_008325, MBF8418333.1	MA-13_genebank.gb_genome (77415/14/1)	gene	zinc metallopeptidase
E2E33_008350	E2E33_008350, MBF8418338.1, bshB1	MA-13_genebank.gb_genome (77415/14/1)	gene	bacillithiol biosynthesis deacetylase BshB1
E2E33_008440	E2E33_008440, MBF8418356.1	MA-13_genebank.gb_genome (77415/14/1)	gene	hypothetical protein
E2E33_008450	E2E33_008450, MBF8418358.1	MA-13_genebank.gb_genome (77415/14/1)	gene	DEAD/DEAH box helicase
E2E33_008500	E2E33_008500, MBF8418367.1	MA-13_genebank.gb_genome (77415/14/1)	gene	SPFH domain-containing protein
E2E33_008525	E2E33_008525, MBF8418372.1	MA-13_genebank.gb_genome (77415/14/1)	gene	HIRAN domain-containing protein
E2E33_008530	E2E33_008530, MBF8418373.1	MA-13_genebank.gb_genome (77415/14/1)	gene	hypothetical protein
E2E33_008535	E2E33_008535, MBF8418374.1	MA-13_genebank.gb_genome (77415/14/1)	gene	helix-turn-helix transcriptional regulator
E2E33_008570	E2E33_008570, MBF8418381.1, addA	MA-13_genebank.gb_genome (77415/14/1)	gene	helicase-exonuclease AddAB subunit AddA
E2E33_008610	E2E33_008610, MBF8418389.1	MA-13_genebank.gb_genome (77415/14/1)	gene	hypothetical protein
E2E33_008615	E2E33_008615, MBF8418390.1	MA-13_genebank.gb_genome (77415/14/1)	gene	fatty acid--CoA ligase family protein
E2E33_008630	E2E33_008630, MBF8418393.1	MA-13_genebank.gb_genome (77415/14/1)	gene	FixH family protein
E2E33_008695	E2E33_008695, MBF8418402.1	MA-13_genebank.gb_genome (77415/14/1)	gene	amidohydrolase
E2E33_008770	E2E33_008770, MBF8418417.1	MA-13_genebank.gb_genome (77415/14/1)	gene	TIGR03943 family protein
E2E33_008810	E2E33_008810, MBF8418425.1	MA-13_genebank.gb_genome (77415/14/1)	gene	YheC/YheD family protein
E2E33_008815	E2E33_008815, MBF8418426.1	MA-13_genebank.gb_genome (77415/14/1)	gene	YheC/YheD family protein
E2E33_008850	E2E33_008850, MBF8418433.1	MA-13_genebank.gb_genome (77415/14/1)	gene	hypothetical protein
E2E33_008855	E2E33_008855, MBF8418434.1	MA-13_genebank.gb_genome (77415/14/1)	gene	hypothetical protein
E2E33_008875	E2E33_008875, MBF8418438.1	MA-13_genebank.gb_genome (77415/14/1)	gene	hypothetical protein
E2E33_008920	E2E33_008920, MBF8418446.1	MA-13_genebank.gb_genome (77415/14/1)	gene	M3 family oligoendopeptidase
E2E33_008930	E2E33_008930, MBF8418448.1	MA-13_genebank.gb_genome (77415/14/1)	gene	hypothetical protein
E2E33_008935	6.2.1.16, E2E33_008935, MBF8418449.1	MA-13_genebank.gb_genome (77415/14/1)	gene	acetoacetate--CoA ligase
E2E33_008975	2.1.1.14, E2E33_008975, MBF8418455.1	MA-13_genebank.gb_genome (77415/14/1)	gene	5-methyltetrahydropteroyltriglutamate-- homocysteine S-methyltransferase
E2E33_008980	E2E33_008980, MBF8418456.1	MA-13_genebank.gb_genome (77415/14/1)	gene	hypothetical protein
E2E33_008985	E2E33_008985, MBF8418457.1, essA	MA-13_genebank.gb_genome (77415/14/1)	gene	type VII secretion protein EssA
E2E33_008990	E2E33_008990, MBF8418458.1	MA-13_genebank.gb_genome (77415/14/1)	gene	hypothetical protein
E2E33_008995	E2E33_008995, MBF8418459.1, essB	MA-13_genebank.gb_genome (77415/14/1)	gene	type VII secretion protein EssB
E2E33_009005	E2E33_009005, MBF8418460.1	MA-13_genebank.gb_genome (77415/14/1)	gene	transposase
E2E33_009015	E2E33_009015, MBF8418462.1	MA-13_genebank.gb_genome (77415/14/1)	gene	IS630 family transposase
E2E33_009025	E2E33_009025, MBF8418464.1	MA-13_genebank.gb_genome (77415/14/1)	gene	aspartate aminotransferase family protein
E2E33_009035	E2E33_009035, MBF8418465.1	MA-13_genebank.gb_genome (77415/14/1)	gene	DHA2 family efflux MFS transporter permease subunit
E2E33_009040	E2E33_009040, MBF8418466.1	MA-13_genebank.gb_genome (77415/14/1)	gene	TetR family transcriptional regulator
E2E33_009065	E2E33_009065, MBF8418469.1	MA-13_genebank.gb_genome (77415/14/1)	gene	hypothetical protein
E2E33_009080	2.7.7.12, E2E33_009080, MBF8418472.1, galT	MA-13_genebank.gb_genome (77415/14/1)	gene	UDP-glucose--hexose-1-phosphate uridylyltransferase
E2E33_009130	3.5.1.25, E2E33_009130, MBF8418482.1, nagA	MA-13_genebank.gb_genome (77415/14/1)	gene	N-acetylglucosamine-6-phosphate deacetylase
E2E33_009215	E2E33_009215, MBF8418496.1	MA-13_genebank.gb_genome (77415/14/1)	gene	Rpn family recombination-promoting nuclease/putative transposase
E2E33_009330	2.2.1.9, E2E33_009330, MBF8418499.1, menD	MA-13_genebank.gb_genome (77415/14/1)	gene	2-succinyl-5-enolpyruvyl-6-hydroxy-3- cyclohexene-1-carboxylic-acid synthase
E2E33_009350	4.2.1.113, E2E33_009350, MBF8418503.1, menC	MA-13_genebank.gb_genome (77415/14/1)	gene	o-succinylbenzoate synthase
E2E33_009410	E2E33_009410, MBF8418515.1	MA-13_genebank.gb_genome (77415/14/1)	gene	flavodoxin family protein
E2E33_009420	E2E33_009420, MBF8418517.1	MA-13_genebank.gb_genome (77415/14/1)	gene	DNA mismatch repair protein MutT
E2E33_009550	E2E33_009550, MBF8418542.1	MA-13_genebank.gb_genome (77415/14/1)	gene	response regulator
E2E33_009555	E2E33_009555, MBF8418543.1	MA-13_genebank.gb_genome (77415/14/1)	gene	protein-glutamate O-methyltransferase CheR
E2E33_009580	E2E33_009580, MBF8418548.1	MA-13_genebank.gb_genome (77415/14/1)	gene	YhcN/YlaJ family sporulation lipoprotein
E2E33_009635	E2E33_009635, MBF8418559.1	MA-13_genebank.gb_genome (77415/14/1)	gene	ATP-grasp domain-containing protein
E2E33_009640	E2E33_009640, MBF8418560.1	MA-13_genebank.gb_genome (77415/14/1)	gene	MFS transporter
E2E33_009650	E2E33_009650, MBF8418562.1	MA-13_genebank.gb_genome (77415/14/1)	gene	hypothetical protein
E2E33_009660	E2E33_009660, MBF8418563.1, queD	MA-13_genebank.gb_genome (77415/14/1)	gene	6-carboxytetrahydropterin synthase QueD
E2E33_009665	4.3.99.3, E2E33_009665, MBF8418564.1, queE	MA-13_genebank.gb_genome (77415/14/1)	gene	7-carboxy-7-deazaguanine synthase QueE
E2E33_009885	E2E33_009885, MBF8418608.1	MA-13_genebank.gb_genome (77415/14/1)	gene	hypothetical protein
E2E33_009910	E2E33_009910, MBF8418613.1, topA	MA-13_genebank.gb_genome (77415/14/1)	gene	type I DNA topoisomerase
E2E33_010170	E2E33_010170, MBF8418665.1, infB	MA-13_genebank.gb_genome (77415/14/1)	gene	translation initiation factor IF-2
E2E33_010230	1.2.1.11, E2E33_010230, MBF8418677.1	MA-13_genebank.gb_genome (77415/14/1)	gene	aspartate-semialdehyde dehydrogenase
E2E33_010235	2.7.2.4, E2E33_010235, MBF8418678.1, dapG	MA-13_genebank.gb_genome (77415/14/1)	gene	aspartate kinase
E2E33_010380	E2E33_010380, MBF8418704.1	MA-13_genebank.gb_genome (77415/14/1)	gene	DUF1835 domain-containing protein
E2E33_010385	E2E33_010385, MBF8418705.1	MA-13_genebank.gb_genome (77415/14/1)	gene	DUF5082 family protein
E2E33_010400	E2E33_010400, MBF8418706.1	MA-13_genebank.gb_genome (77415/14/1)	gene	hypothetical protein
E2E33_010405	1.1.1.1, E2E33_010405, MBF8418707.1, adhP	MA-13_genebank.gb_genome (77415/14/1)	gene	alcohol dehydrogenase AdhP
E2E33_010435	E2E33_010435, MBF8418712.1	MA-13_genebank.gb_genome (77415/14/1)	gene	terpene cyclase
E2E33_010570	E2E33_010570, MBF8418735.1	MA-13_genebank.gb_genome (77415/14/1)	gene	YezD family protein
E2E33_010590	E2E33_010590, MBF8418738.1	MA-13_genebank.gb_genome (77415/14/1)	gene	hypothetical protein
E2E33_010595	E2E33_010595, MBF8418739.1	MA-13_genebank.gb_genome (77415/14/1)	gene	LysM peptidoglycan-binding domain-containing protein
E2E33_010605	E2E33_010605, MBF8418741.1	MA-13_genebank.gb_genome (77415/14/1)	gene	MarR family transcriptional regulator
E2E33_010610	E2E33_010610, MBF8418742.1	MA-13_genebank.gb_genome (77415/14/1)	gene	ABC transporter ATP-binding protein
E2E33_010615	E2E33_010615, MBF8418743.1	MA-13_genebank.gb_genome (77415/14/1)	gene	ABC transporter ATP-binding protein
E2E33_010625	E2E33_010625, MBF8418744.1	MA-13_genebank.gb_genome (77415/14/1)	gene	serine hydrolase
E2E33_010630	E2E33_010630, MBF8418745.1	MA-13_genebank.gb_genome (77415/14/1)	gene	glycoside hydrolase family 3 C-terminal domain-containing protein
E2E33_010665	E2E33_010665	MA-13_genebank.gb_genome (77415/14/1)	gene	PTS sugar transporter subunit IIC
E2E33_010670	E2E33_010670, MBF8418751.1	MA-13_genebank.gb_genome (77415/14/1)	gene	MFS transporter
E2E33_010690	E2E33_010690, MBF8418752.1	MA-13_genebank.gb_genome (77415/14/1)	gene	MarR family transcriptional regulator
E2E33_010695	E2E33_010695, MBF8418753.1	MA-13_genebank.gb_genome (77415/14/1)	gene	MFS transporter
E2E33_010700	E2E33_010700, MBF8418754.1	MA-13_genebank.gb_genome (77415/14/1)	gene	LacI family DNA-binding transcriptional regulator
E2E33_010705	E2E33_010705, MBF8418755.1	MA-13_genebank.gb_genome (77415/14/1)	gene	beta-galactosidase
E2E33_010735	E2E33_010735, MBF8418761.1	MA-13_genebank.gb_genome (77415/14/1)	gene	acetyltransferase
E2E33_010740	E2E33_010740	MA-13_genebank.gb_genome (77415/14/1)	gene	short-chain dehydrogenase/reductase SDR
E2E33_010770	E2E33_010770, MBF8418765.1	MA-13_genebank.gb_genome (77415/14/1)	gene	YifB family Mg chelatase-like AAA ATPase
E2E33_010775	E2E33_010775, MBF8418766.1	MA-13_genebank.gb_genome (77415/14/1)	gene	Rpn family recombination-promoting nuclease/putative transposase
E2E33_010815	E2E33_010815, MBF8418774.1	MA-13_genebank.gb_genome (77415/14/1)	gene	formate/nitrite transporter family protein
E2E33_010830	E2E33_010830, MBF8418777.1	MA-13_genebank.gb_genome (77415/14/1)	gene	ECF-type riboflavin transporter substrate-binding protein
E2E33_010845	E2E33_010845, MBF8418780.1	MA-13_genebank.gb_genome (77415/14/1)	gene	glycoside hydrolase
E2E33_010850	E2E33_010850, MBF8418781.1	MA-13_genebank.gb_genome (77415/14/1)	gene	DUF2339 domain-containing protein
E2E33_010855	E2E33_010855, MBF8418782.1	MA-13_genebank.gb_genome (77415/14/1)	gene	hypothetical protein
E2E33_010860	E2E33_010860, MBF8418783.1	MA-13_genebank.gb_genome (77415/14/1)	gene	hypothetical protein
E2E33_010865	E2E33_010865, MBF8418784.1	MA-13_genebank.gb_genome (77415/14/1)	gene	glycerophosphodiester phosphodiesterase
E2E33_010880	E2E33_010880, MBF8418786.1	MA-13_genebank.gb_genome (77415/14/1)	gene	TetR/AcrR family transcriptional regulator
E2E33_010885	E2E33_010885, MBF8418787.1	MA-13_genebank.gb_genome (77415/14/1)	gene	FAD-dependent oxidoreductase
E2E33_010905	E2E33_010905, MBF8418790.1	MA-13_genebank.gb_genome (77415/14/1)	gene	hypothetical protein
E2E33_010915	E2E33_010915, MBF8418791.1	MA-13_genebank.gb_genome (77415/14/1)	gene	L-lactate permease
E2E33_010935	E2E33_010935, MBF8418795.1	MA-13_genebank.gb_genome (77415/14/1)	gene	LCP family protein
E2E33_010980	E2E33_010980, MBF8418802.1	MA-13_genebank.gb_genome (77415/14/1)	gene	DUF1129 family protein
E2E33_011010	E2E33_011010, MBF8418808.1	MA-13_genebank.gb_genome (77415/14/1)	gene	HAMP domain-containing protein
E2E33_011015	E2E33_011015, MBF8418809.1	MA-13_genebank.gb_genome (77415/14/1)	gene	zinc-binding dehydrogenase
E2E33_011025	E2E33_011025, MBF8418811.1	MA-13_genebank.gb_genome (77415/14/1)	gene	O-antigen ligase family protein
E2E33_011035	E2E33_011035, MBF8418813.1	MA-13_genebank.gb_genome (77415/14/1)	gene	MFS transporter
E2E33_011040	E2E33_011040, MBF8418814.1	MA-13_genebank.gb_genome (77415/14/1)	gene	MFS transporter
E2E33_011050	E2E33_011050, MBF8418815.1	MA-13_genebank.gb_genome (77415/14/1)	gene	zinc-dependent alcohol dehydrogenase family protein
E2E33_011195	E2E33_011195, MBF8418825.1	MA-13_genebank.gb_genome (77415/14/1)	gene	glycoside hydrolase family 18 protein
E2E33_011210	E2E33_011210, MBF8418828.1	MA-13_genebank.gb_genome (77415/14/1)	gene	deoxynucleoside kinase
E2E33_011230	E2E33_011230, MBF8418831.1, spoVAD	MA-13_genebank.gb_genome (77415/14/1)	gene	stage V sporulation protein AD
E2E33_011320	E2E33_011320, MBF8418849.1, pepF	MA-13_genebank.gb_genome (77415/14/1)	gene	oligoendopeptidase F
E2E33_011395	E2E33_011395, MBF8418864.1	MA-13_genebank.gb_genome (77415/14/1)	gene	ABC transporter ATP-binding protein
E2E33_011450	E2E33_011450, MBF8418875.1	MA-13_genebank.gb_genome (77415/14/1)	gene	HAD-IIB family hydrolase
E2E33_011455	E2E33_011455, MBF8418876.1	MA-13_genebank.gb_genome (77415/14/1)	gene	transposase
E2E33_011460	E2E33_011460, MBF8418877.1	MA-13_genebank.gb_genome (77415/14/1)	gene	ribbon-helix-helix domain-containing protein
E2E33_011510	E2E33_011510, MBF8418884.1	MA-13_genebank.gb_genome (77415/14/1)	gene	ATP-binding cassette domain-containing protein
E2E33_011525	E2E33_011525, MBF8418885.1	MA-13_genebank.gb_genome (77415/14/1)	gene	Crp/Fnr family transcriptional regulator
E2E33_011530	1.7.99.4, E2E33_011530, MBF8418886.1	MA-13_genebank.gb_genome (77415/14/1)	gene	nitrate reductase subunit alpha
E2E33_011535	1.7.99.4, E2E33_011535, MBF8418887.1, narH	MA-13_genebank.gb_genome (77415/14/1)	gene	nitrate reductase subunit beta
E2E33_011540	E2E33_011540, MBF8418888.1, narJ	MA-13_genebank.gb_genome (77415/14/1)	gene	nitrate reductase molybdenum cofactor assembly chaperone
E2E33_011545	1.7.99.4, E2E33_011545, MBF8418889.1, narI	MA-13_genebank.gb_genome (77415/14/1)	gene	respiratory nitrate reductase subunit gamma
E2E33_011550	E2E33_011550, MBF8418890.1	MA-13_genebank.gb_genome (77415/14/1)	gene	YwiC-like family protein
E2E33_011555	E2E33_011555, MBF8418891.1	MA-13_genebank.gb_genome (77415/14/1)	gene	NarK/NasA family nitrate transporter
E2E33_011565	E2E33_011565, MBF8418893.1, modB	MA-13_genebank.gb_genome (77415/14/1)	gene	molybdate ABC transporter permease subunit
E2E33_011570	E2E33_011570, MBF8418894.1	MA-13_genebank.gb_genome (77415/14/1)	gene	ATP-binding cassette domain-containing protein
E2E33_011595	E2E33_011595, MBF8418899.1, mobB	MA-13_genebank.gb_genome (77415/14/1)	gene	molybdopterin-guanine dinucleotide biosynthesis protein B
E2E33_011610	4.6.1.17, E2E33_011610, MBF8418902.1, moaC	MA-13_genebank.gb_genome (77415/14/1)	gene	cyclic pyranopterin monophosphate synthase MoaC
E2E33_011655	E2E33_011655, MBF8418911.1	MA-13_genebank.gb_genome (77415/14/1)	gene	hypothetical protein
E2E33_011660	E2E33_011660, MBF8418912.1	MA-13_genebank.gb_genome (77415/14/1)	gene	hypothetical protein
E2E33_011665	E2E33_011665, MBF8418913.1	MA-13_genebank.gb_genome (77415/14/1)	gene	site-specific integrase
E2E33_011770	E2E33_011770, MBF8418934.1	MA-13_genebank.gb_genome (77415/14/1)	gene	DNA primase
E2E33_011895	E2E33_011895, MBF8418959.1	MA-13_genebank.gb_genome (77415/14/1)	gene	helix-turn-helix domain-containing protein
E2E33_011900	E2E33_011900, MBF8418960.1	MA-13_genebank.gb_genome (77415/14/1)	gene	cell division protein FtsK
E2E33_011905	E2E33_011905, MBF8418961.1	MA-13_genebank.gb_genome (77415/14/1)	gene	replication-relaxation family protein
E2E33_012000	E2E33_012000, MBF8418980.1	MA-13_genebank.gb_genome (77415/14/1)	gene	hypothetical protein
E2E33_012045	2.7.7.7, E2E33_012045, MBF8418989.1, dnaE	MA-13_genebank.gb_genome (77415/14/1)	gene	DNA polymerase III subunit alpha
E2E33_012055	6.4.1.2, E2E33_012055, MBF8418991.1	MA-13_genebank.gb_genome (77415/14/1)	gene	acetyl-CoA carboxylase carboxyltransferase subunit beta
E2E33_012125	E2E33_012125, MBF8419005.1	MA-13_genebank.gb_genome (77415/14/1)	gene	benzoate transporter
E2E33_012165	E2E33_012165, MBF8419013.1	MA-13_genebank.gb_genome (77415/14/1)	gene	HD family phosphohydrolase
E2E33_012335	E2E33_012335, MBF8419047.1	MA-13_genebank.gb_genome (77415/14/1)	gene	(Fe-S)-binding protein
E2E33_012340	E2E33_012340, MBF8419048.1, glcD	MA-13_genebank.gb_genome (77415/14/1)	gene	glycolate oxidase subunit GlcD
E2E33_012345	E2E33_012345, MBF8419049.1	MA-13_genebank.gb_genome (77415/14/1)	gene	helix-turn-helix domain-containing protein
E2E33_012350	E2E33_012350, MBF8419050.1	MA-13_genebank.gb_genome (77415/14/1)	gene	multicopper oxidase domain-containing protein
E2E33_012355	E2E33_012355, MBF8419051.1	MA-13_genebank.gb_genome (77415/14/1)	gene	ISLre2 family transposase
E2E33_012360	E2E33_012360, MBF8419052.1	MA-13_genebank.gb_genome (77415/14/1)	gene	HD-GYP domain-containing protein
E2E33_012425	E2E33_012425, MBF8419063.1	MA-13_genebank.gb_genome (77415/14/1)	gene	CitMHS family transporter
E2E33_012430	E2E33_012430, MBF8419064.1	MA-13_genebank.gb_genome (77415/14/1)	gene	response regulator
E2E33_012435	E2E33_012435, MBF8419065.1	MA-13_genebank.gb_genome (77415/14/1)	gene	sensor histidine kinase
E2E33_012460	E2E33_012460, MBF8419070.1	MA-13_genebank.gb_genome (77415/14/1)	gene	iron-sulfur cluster-binding protein
E2E33_012565	E2E33_012565, MBF8419090.1	MA-13_genebank.gb_genome (77415/14/1)	gene	hypothetical protein
E2E33_012570	E2E33_012570, MBF8419091.1	MA-13_genebank.gb_genome (77415/14/1)	gene	sigma 54-interacting transcriptional regulator
E2E33_012575	E2E33_012575, MBF8419092.1	MA-13_genebank.gb_genome (77415/14/1)	gene	hypothetical protein
E2E33_012580	E2E33_012580, MBF8419093.1	MA-13_genebank.gb_genome (77415/14/1)	gene	LacI family DNA-binding transcriptional regulator
E2E33_012585	2.7.1.15, E2E33_012585, MBF8419094.1, rbsK	MA-13_genebank.gb_genome (77415/14/1)	gene	ribokinase
E2E33_012590	5.4.99.62, E2E33_012590, MBF8419095.1, rbsD	MA-13_genebank.gb_genome (77415/14/1)	gene	D-ribose pyranase
E2E33_012595	E2E33_012595, MBF8419096.1	MA-13_genebank.gb_genome (77415/14/1)	gene	sugar ABC transporter ATP-binding protein
E2E33_012600	E2E33_012600, MBF8419097.1, rbsC	MA-13_genebank.gb_genome (77415/14/1)	gene	ribose ABC transporter permease
E2E33_012605	E2E33_012605, MBF8419098.1, rbsB	MA-13_genebank.gb_genome (77415/14/1)	gene	ribose ABC transporter substrate-binding protein RbsB
E2E33_012620	E2E33_012620, MBF8419100.1	MA-13_genebank.gb_genome (77415/14/1)	gene	2,3-butanediol dehydrogenase
E2E33_012625	E2E33_012625, MBF8419101.1	MA-13_genebank.gb_genome (77415/14/1)	gene	PRK06851 family protein
E2E33_012645	E2E33_012645, MBF8419105.1	MA-13_genebank.gb_genome (77415/14/1)	gene	hypothetical protein
E2E33_012655	E2E33_012655, MBF8419107.1	MA-13_genebank.gb_genome (77415/14/1)	gene	transposase
E2E33_012660	E2E33_012660, MBF8419108.1	MA-13_genebank.gb_genome (77415/14/1)	gene	DUF2247 family protein
E2E33_012670	E2E33_012670, MBF8419110.1	MA-13_genebank.gb_genome (77415/14/1)	gene	cation:dicarboxylase symporter family transporter
E2E33_012675	2.1.1.72, E2E33_012675, MBF8419111.1	MA-13_genebank.gb_genome (77415/14/1)	gene	type I restriction-modification system subunit M
E2E33_012680	E2E33_012680, MBF8419112.1	MA-13_genebank.gb_genome (77415/14/1)	gene	restriction endonuclease subunit S
E2E33_012685	E2E33_012685, MBF8419113.1	MA-13_genebank.gb_genome (77415/14/1)	gene	type I restriction endonuclease subunit R
E2E33_012690	E2E33_012690, MBF8419114.1	MA-13_genebank.gb_genome (77415/14/1)	gene	M48 family metallopeptidase
E2E33_012845	E2E33_012845, MBF8419143.1	MA-13_genebank.gb_genome (77415/14/1)	gene	DUF5316 domain-containing protein
E2E33_012895	E2E33_012895, MBF8419153.1	MA-13_genebank.gb_genome (77415/14/1)	gene	glycosyltransferase
E2E33_012900	E2E33_012900, MBF8419154.1	MA-13_genebank.gb_genome (77415/14/1)	gene	hypothetical protein
E2E33_012905	E2E33_012905, MBF8419155.1	MA-13_genebank.gb_genome (77415/14/1)	gene	EamA family transporter
E2E33_012910	E2E33_012910, MBF8419156.1	MA-13_genebank.gb_genome (77415/14/1)	gene	EamA family transporter
E2E33_013010	E2E33_013010, MBF8419176.1	MA-13_genebank.gb_genome (77415/14/1)	gene	Fis family transcriptional regulator
E2E33_013025	E2E33_013025, MBF8419178.1	MA-13_genebank.gb_genome (77415/14/1)	gene	glycerophosphodiester phosphodiesterase
E2E33_013115	E2E33_013115, MBF8419196.1, spoIIIAE	MA-13_genebank.gb_genome (77415/14/1)	gene	stage III sporulation protein AE
E2E33_013315	E2E33_013315, MBF8419233.1	MA-13_genebank.gb_genome (77415/14/1)	gene	hypothetical protein
E2E33_013615	E2E33_013615, MBF8419285.1	MA-13_genebank.gb_genome (77415/14/1)	gene	extracellular solute-binding protein
E2E33_013625	E2E33_013625, MBF8419287.1	MA-13_genebank.gb_genome (77415/14/1)	gene	sugar ABC transporter permease
E2E33_013630	E2E33_013630, MBF8419288.1	MA-13_genebank.gb_genome (77415/14/1)	gene	DUF1189 family protein
E2E33_013640	E2E33_013640, MBF8419290.1	MA-13_genebank.gb_genome (77415/14/1)	gene	alpha-glucosidase
E2E33_013800	E2E33_013800, MBF8419321.1	MA-13_genebank.gb_genome (77415/14/1)	gene	ATP synthase subunit I
E2E33_013825	E2E33_013825, MBF8419326.1	MA-13_genebank.gb_genome (77415/14/1)	gene	methyl-accepting chemotaxis protein
E2E33_013880	E2E33_013880, MBF8419335.1	MA-13_genebank.gb_genome (77415/14/1)	gene	dihydroorotate dehydrogenase electron transfer subunit
E2E33_013980	E2E33_013980, MBF8419355.1, spoIIGA	MA-13_genebank.gb_genome (77415/14/1)	gene	sigma-E processing peptidase SpoIIGA
E2E33_014030	E2E33_014030, MBF8419365.1	MA-13_genebank.gb_genome (77415/14/1)	gene	stage V sporulation protein D
E2E33_014095	E2E33_014095, MBF8419378.1	MA-13_genebank.gb_genome (77415/14/1)	gene	patatin-like phospholipase family protein
E2E33_014180	2.4.2.29, E2E33_014180, MBF8419395.1, tgt	MA-13_genebank.gb_genome (77415/14/1)	gene	tRNA guanosine(34) transglycosylase Tgt
E2E33_014210	E2E33_014210, MBF8419401.1	MA-13_genebank.gb_genome (77415/14/1)	gene	aminoglycoside phosphotransferase family protein
E2E33_014225	4.2.1.51, E2E33_014225, MBF8419404.1, pheA	MA-13_genebank.gb_genome (77415/14/1)	gene	prephenate dehydratase
E2E33_014295	E2E33_014295, MBF8419418.1	MA-13_genebank.gb_genome (77415/14/1)	gene	rod shape-determining protein
E2E33_014375	E2E33_014375, MBF8419434.1	MA-13_genebank.gb_genome (77415/14/1)	gene	prepilin-type N-terminal cleavage/methylation domain-containing protein
E2E33_014485	E2E33_014485, MBF8419455.1	MA-13_genebank.gb_genome (77415/14/1)	gene	glycoside hydrolase family 65 protein
E2E33_014490	E2E33_014490, MBF8419456.1	MA-13_genebank.gb_genome (77415/14/1)	gene	carbohydrate ABC transporter permease
E2E33_014495	E2E33_014495, MBF8419457.1	MA-13_genebank.gb_genome (77415/14/1)	gene	sugar ABC transporter permease
E2E33_014500	E2E33_014500, MBF8419458.1	MA-13_genebank.gb_genome (77415/14/1)	gene	extracellular solute-binding protein
E2E33_014505	E2E33_014505, MBF8419459.1	MA-13_genebank.gb_genome (77415/14/1)	gene	AraC family transcriptional regulator
E2E33_014515	E2E33_014515, MBF8419461.1	MA-13_genebank.gb_genome (77415/14/1)	gene	iron-sulfur cluster biosynthesis family protein
E2E33_014520	1.3.1.95, E2E33_014520, MBF8419462.1	MA-13_genebank.gb_genome (77415/14/1)	gene	acryloyl-CoA reductase
E2E33_014525	E2E33_014525, MBF8419463.1	MA-13_genebank.gb_genome (77415/14/1)	gene	cation transporter
E2E33_014550	E2E33_014550, MBF8419468.1	MA-13_genebank.gb_genome (77415/14/1)	gene	SDR family NAD(P)-dependent oxidoreductase
E2E33_014575	E2E33_014575, MBF8419473.1	MA-13_genebank.gb_genome (77415/14/1)	gene	HAD family hydrolase
E2E33_014590	5.4.2.6, E2E33_014590, MBF8419475.1, pgmB	MA-13_genebank.gb_genome (77415/14/1)	gene	beta-phosphoglucomutase
E2E33_014600	E2E33_014600, MBF8419477.1	MA-13_genebank.gb_genome (77415/14/1)	gene	SLC45 family MFS transporter
E2E33_014605	E2E33_014605, MBF8419478.1	MA-13_genebank.gb_genome (77415/14/1)	gene	LacI family DNA-binding transcriptional regulator
E2E33_014615	E2E33_014615, MBF8419479.1	MA-13_genebank.gb_genome (77415/14/1)	gene	hypothetical protein
E2E33_014620	4.1.1.31, E2E33_014620, MBF8419480.1, ppc	MA-13_genebank.gb_genome (77415/14/1)	gene	phosphoenolpyruvate carboxylase
E2E33_014625	E2E33_014625, MBF8419481.1	MA-13_genebank.gb_genome (77415/14/1)	gene	hypothetical protein
E2E33_014635	E2E33_014635, MBF8419483.1	MA-13_genebank.gb_genome (77415/14/1)	gene	hypothetical protein
E2E33_014640	E2E33_014640, MBF8419484.1	MA-13_genebank.gb_genome (77415/14/1)	gene	hypothetical protein
E2E33_014670	E2E33_014670, MBF8419489.1	MA-13_genebank.gb_genome (77415/14/1)	gene	sigma 54-interacting transcriptional regulator
E2E33_014675	E2E33_014675, MBF8419490.1	MA-13_genebank.gb_genome (77415/14/1)	gene	PTS sugar transporter subunit IIB
E2E33_014680	E2E33_014680, MBF8419491.1	MA-13_genebank.gb_genome (77415/14/1)	gene	PTS sugar transporter subunit IIB
E2E33_014690	E2E33_014690, MBF8419492.1	MA-13_genebank.gb_genome (77415/14/1)	gene	hypothetical protein

## Sheet: core
Feature Id	Aliases	Genome	Type	Function
E2E33_000005	3.5.3.1, E2E33_000005, MBF8416802.1, rocF	MA-13_genebank.gb_genome (77415/14/1)	gene	arginase
E2E33_000095	E2E33_000095, MBF8416810.1	MA-13_genebank.gb_genome (77415/14/1)	gene	MATE family efflux transporter
E2E33_000105	E2E33_000105, MBF8416812.1, sspI	MA-13_genebank.gb_genome (77415/14/1)	gene	small acid-soluble spore protein SspI
E2E33_000115	E2E33_000115, MBF8416813.1	MA-13_genebank.gb_genome (77415/14/1)	gene	hypothetical protein
E2E33_000100	E2E33_000100, MBF8416811.1	MA-13_genebank.gb_genome (77415/14/1)	gene	RNA methyltransferase
E2E33_000155	E2E33_000155, MBF8416819.1	MA-13_genebank.gb_genome (77415/14/1)	gene	bifunctional metallophosphatase/5'-nucleotidase
E2E33_000160	E2E33_000160, MBF8416820.1	MA-13_genebank.gb_genome (77415/14/1)	gene	DUF1805 domain-containing protein
E2E33_000165	E2E33_000165, MBF8416821.1, yunB	MA-13_genebank.gb_genome (77415/14/1)	gene	sporulation protein YunB
E2E33_000170	E2E33_000170, MBF8416822.1	MA-13_genebank.gb_genome (77415/14/1)	gene	M23 family metallopeptidase
E2E33_000175	2.8.1.8, E2E33_000175, MBF8416823.1, lipA	MA-13_genebank.gb_genome (77415/14/1)	gene	lipoyl synthase
E2E33_000180	E2E33_000180, MBF8416824.1	MA-13_genebank.gb_genome (77415/14/1)	gene	DUF1027 domain-containing protein
E2E33_000185	E2E33_000185, MBF8416825.1	MA-13_genebank.gb_genome (77415/14/1)	gene	DUF86 domain-containing protein
E2E33_000190	E2E33_000190, MBF8416826.1	MA-13_genebank.gb_genome (77415/14/1)	gene	TIGR01457 family HAD-type hydrolase
E2E33_000240	1.2.5.1, E2E33_000240, MBF8416835.1, poxB	MA-13_genebank.gb_genome (77415/14/1)	gene	ubiquinone-dependent pyruvate dehydrogenase
E2E33_000245	E2E33_000245, MBF8416836.1, uraA	MA-13_genebank.gb_genome (77415/14/1)	gene	uracil permease
E2E33_000255	2.1.1.190, E2E33_000255, MBF8416838.1, rlmD	MA-13_genebank.gb_genome (77415/14/1)	gene	23S rRNA (uracil(1939)-C(5))-methyltransferase RlmD
E2E33_000260	E2E33_000260, MBF8416839.1	MA-13_genebank.gb_genome (77415/14/1)	gene	acyl carrier protein
E2E33_000265	E2E33_000265, MBF8416840.1	MA-13_genebank.gb_genome (77415/14/1)	gene	alpha-galactosidase
E2E33_000275	E2E33_000275, MBF8416841.1	MA-13_genebank.gb_genome (77415/14/1)	gene	pyridoxal phosphate-dependent aminotransferase
E2E33_000280	E2E33_000280, MBF8416842.1	MA-13_genebank.gb_genome (77415/14/1)	gene	YhbD family protein
E2E33_000320	6.1.1.11, E2E33_000320, MBF8416849.1, serS	MA-13_genebank.gb_genome (77415/14/1)	gene	serine--tRNA ligase
E2E33_000325	3.5.1.2, 4.3.3.6, E2E33_000325, MBF8416850.1, pdxT	MA-13_genebank.gb_genome (77415/14/1)	gene	pyridoxal 5'-phosphate synthase glutaminase subunit PdxT
E2E33_000330	E2E33_000330, MBF8416851.1, pdxS	MA-13_genebank.gb_genome (77415/14/1)	gene	pyridoxal 5'-phosphate synthase lyase subunit PdxS
E2E33_000335	E2E33_000335, MBF8416852.1	MA-13_genebank.gb_genome (77415/14/1)	gene	D-alanyl-D-alanine carboxypeptidase
E2E33_000340	1.1.1.205, E2E33_000340, MBF8416853.1, guaB	MA-13_genebank.gb_genome (77415/14/1)	gene	IMP dehydrogenase
E2E33_000345	E2E33_000345, MBF8416854.1	MA-13_genebank.gb_genome (77415/14/1)	gene	YaaC family protein
E2E33_000360	6.3.4.4, E2E33_000360, MBF8416855.1	MA-13_genebank.gb_genome (77415/14/1)	gene	adenylosuccinate synthase
E2E33_000365	3.6.4.12, E2E33_000365, MBF8416856.1, dnaB	MA-13_genebank.gb_genome (77415/14/1)	gene	replicative DNA helicase
E2E33_000370	E2E33_000370, MBF8416857.1, rplI	MA-13_genebank.gb_genome (77415/14/1)	gene	50S ribosomal protein L9
E2E33_000375	E2E33_000375, MBF8416858.1	MA-13_genebank.gb_genome (77415/14/1)	gene	DHH family phosphoesterase
E2E33_000380	E2E33_000380, MBF8416859.1	MA-13_genebank.gb_genome (77415/14/1)	gene	YybS family protein
E2E33_000385	E2E33_000385, MBF8416860.1, rpsR	MA-13_genebank.gb_genome (77415/14/1)	gene	30S ribosomal protein S18
E2E33_000390	E2E33_000390, MBF8416861.1, ssb	MA-13_genebank.gb_genome (77415/14/1)	gene	single-stranded DNA-binding protein
E2E33_000395	E2E33_000395, MBF8416862.1	MA-13_genebank.gb_genome (77415/14/1)	gene	30S ribosomal protein S6
E2E33_000425	E2E33_000425, MBF8416866.1	MA-13_genebank.gb_genome (77415/14/1)	gene	ParA family protein
E2E33_000430	E2E33_000430, MBF8416867.1	MA-13_genebank.gb_genome (77415/14/1)	gene	ParB/RepB/Spo0J family partition protein
E2E33_000435	E2E33_000435, MBF8416868.1	MA-13_genebank.gb_genome (77415/14/1)	gene	DUF554 domain-containing protein
E2E33_000440	E2E33_000440, MBF8416869.1, yyaC	MA-13_genebank.gb_genome (77415/14/1)	gene	spore protease YyaC
E2E33_000445	E2E33_000445, MBF8416870.1	MA-13_genebank.gb_genome (77415/14/1)	gene	mechanosensitive ion channel family protein
E2E33_000450	E2E33_000450, MBF8416871.1	MA-13_genebank.gb_genome (77415/14/1)	gene	DUF951 domain-containing protein
E2E33_000455	E2E33_000455, MBF8416872.1, ychF	MA-13_genebank.gb_genome (77415/14/1)	gene	redox-regulated ATPase YchF
E2E33_000460	1.1.1.193, 3.5.4.26, E2E33_000460, MBF8416873.1, ribD	MA-13_genebank.gb_genome (77415/14/1)	gene	bifunctional diaminohydroxyphosphoribosylaminopyrimidine deaminase/5-amino-6-(5-phosphoribosylamino)uracil reductase RibD
E2E33_000465	2.5.1.9, E2E33_000465, MBF8416874.1	MA-13_genebank.gb_genome (77415/14/1)	gene	riboflavin synthase
E2E33_000470	3.5.4.25, 4.1.99.12, E2E33_000470, MBF8416875.1	MA-13_genebank.gb_genome (77415/14/1)	gene	bifunctional 3,4-dihydroxy-2-butanone-4-phosphate synthase/GTP cyclohydrolase II
E2E33_000475	2.5.1.78, E2E33_000475, MBF8416876.1	MA-13_genebank.gb_genome (77415/14/1)	gene	6,7-dimethyl-8-ribityllumazine synthase
E2E33_000485	E2E33_000485, MBF8416878.1	MA-13_genebank.gb_genome (77415/14/1)	gene	helix-turn-helix transcriptional regulator
E2E33_000490	E2E33_000490, MBF8416879.1	MA-13_genebank.gb_genome (77415/14/1)	gene	histidine phosphatase family protein
E2E33_000495	E2E33_000495, MBF8416880.1	MA-13_genebank.gb_genome (77415/14/1)	gene	cation:dicarboxylase symporter family transporter
E2E33_000500	E2E33_000500, MBF8416881.1	MA-13_genebank.gb_genome (77415/14/1)	gene	metallophosphoesterase
E2E33_000505	E2E33_000505, MBF8416882.1	MA-13_genebank.gb_genome (77415/14/1)	gene	metal-sensitive transcriptional regulator
E2E33_000510	E2E33_000510, MBF8416883.1, copZ	MA-13_genebank.gb_genome (77415/14/1)	gene	copper chaperone CopZ
E2E33_000515	E2E33_000515, MBF8416884.1	MA-13_genebank.gb_genome (77415/14/1)	gene	copper-translocating P-type ATPase
E2E33_000525	E2E33_000525, MBF8416886.1	MA-13_genebank.gb_genome (77415/14/1)	gene	DUF1646 family protein
E2E33_000530	E2E33_000530, MBF8416887.1	MA-13_genebank.gb_genome (77415/14/1)	gene	MgtC/SapB family protein
E2E33_000535	E2E33_000535, MBF8416888.1	MA-13_genebank.gb_genome (77415/14/1)	gene	DMT family transporter
E2E33_000555	E2E33_000555, MBF8416891.1	MA-13_genebank.gb_genome (77415/14/1)	gene	DUF2268 domain-containing protein
E2E33_000590	E2E33_000590, MBF8416896.1	MA-13_genebank.gb_genome (77415/14/1)	gene	YkvR family protein
E2E33_000595	E2E33_000595, MBF8416897.1	MA-13_genebank.gb_genome (77415/14/1)	gene	LLM class flavin-dependent oxidoreductase
E2E33_000600	1.1.1.88, E2E33_000600, MBF8416898.1	MA-13_genebank.gb_genome (77415/14/1)	gene	hydroxymethylglutaryl-CoA reductase, degradative
E2E33_000605	2.3.3.10, E2E33_000605, MBF8416899.1	MA-13_genebank.gb_genome (77415/14/1)	gene	hydroxymethylglutaryl-CoA synthase
E2E33_000610	E2E33_000610, MBF8416900.1	MA-13_genebank.gb_genome (77415/14/1)	gene	acetyl-CoA C-acetyltransferase
E2E33_000615	E2E33_000615, MBF8416901.1	MA-13_genebank.gb_genome (77415/14/1)	gene	DsrE family protein
E2E33_000625	E2E33_000625, MBF8416903.1	MA-13_genebank.gb_genome (77415/14/1)	gene	D-glycerate dehydrogenase
E2E33_000655	E2E33_000655, MBF8416909.1	MA-13_genebank.gb_genome (77415/14/1)	gene	SDR family oxidoreductase
E2E33_000665	2.7.4.2, E2E33_000665, MBF8416911.1	MA-13_genebank.gb_genome (77415/14/1)	gene	phosphomevalonate kinase
E2E33_000675	2.7.1.36, E2E33_000675, MBF8416913.1, mvk	MA-13_genebank.gb_genome (77415/14/1)	gene	mevalonate kinase
E2E33_000680	2.6.1.16, E2E33_000680, MBF8416914.1, glmS	MA-13_genebank.gb_genome (77415/14/1)	gene	glutamine--fructose-6-phosphate transaminase (isomerizing)
E2E33_000685	E2E33_000685, MBF8416915.1	MA-13_genebank.gb_genome (77415/14/1)	gene	cation transporter
E2E33_000695	E2E33_000695, MBF8416917.1	MA-13_genebank.gb_genome (77415/14/1)	gene	NERD domain-containing protein
E2E33_000700	E2E33_000700, MBF8416918.1	MA-13_genebank.gb_genome (77415/14/1)	gene	EamA family transporter
E2E33_000705	E2E33_000705, MBF8416919.1	MA-13_genebank.gb_genome (77415/14/1)	gene	hypothetical protein
E2E33_000710	E2E33_000710, MBF8416920.1	MA-13_genebank.gb_genome (77415/14/1)	gene	long-chain-fatty-acid--CoA ligase
E2E33_000715	E2E33_000715, MBF8416921.1	MA-13_genebank.gb_genome (77415/14/1)	gene	M15 family metallopeptidase
E2E33_000720	E2E33_000720, MBF8416922.1	MA-13_genebank.gb_genome (77415/14/1)	gene	YozD family protein
E2E33_000725	E2E33_000725, MBF8416923.1	MA-13_genebank.gb_genome (77415/14/1)	gene	hypothetical protein
E2E33_000735	E2E33_000735, MBF8416925.1	MA-13_genebank.gb_genome (77415/14/1)	gene	CHASE3 domain-containing protein
E2E33_000745	1.8.4.12, E2E33_000745, MBF8416927.1, msrB	MA-13_genebank.gb_genome (77415/14/1)	gene	peptide-methionine (R)-S-oxide reductase MsrB
E2E33_000750	1.8.4.11, E2E33_000750, MBF8416928.1, msrA	MA-13_genebank.gb_genome (77415/14/1)	gene	peptide-methionine (S)-S-oxide reductase MsrA
E2E33_000755	E2E33_000755, MBF8416929.1	MA-13_genebank.gb_genome (77415/14/1)	gene	RsmB/NOP family class I SAM-dependent RNA methyltransferase
E2E33_000760	E2E33_000760, MBF8416930.1	MA-13_genebank.gb_genome (77415/14/1)	gene	YpmS family protein
E2E33_000765	E2E33_000765, MBF8416931.1	MA-13_genebank.gb_genome (77415/14/1)	gene	SGNH/GDSL hydrolase family protein
E2E33_000770	E2E33_000770, MBF8416932.1	MA-13_genebank.gb_genome (77415/14/1)	gene	hemolysin III family protein
E2E33_000775	E2E33_000775, MBF8416933.1	MA-13_genebank.gb_genome (77415/14/1)	gene	dihydrofolate reductase
E2E33_000780	2.1.1.45, E2E33_000780, MBF8416934.1	MA-13_genebank.gb_genome (77415/14/1)	gene	thymidylate synthase
E2E33_000785	E2E33_000785, MBF8416935.1	MA-13_genebank.gb_genome (77415/14/1)	gene	YpjP family protein
E2E33_000790	E2E33_000790, MBF8416936.1	MA-13_genebank.gb_genome (77415/14/1)	gene	BrxA/BrxB family bacilliredoxin
E2E33_000795	E2E33_000795, MBF8416937.1	MA-13_genebank.gb_genome (77415/14/1)	gene	conserved virulence factor C family protein
E2E33_000940	E2E33_000940, MBF8416957.1	MA-13_genebank.gb_genome (77415/14/1)	gene	hypothetical protein
E2E33_000945	E2E33_000945, MBF8416958.1	MA-13_genebank.gb_genome (77415/14/1)	gene	NCS2 family permease
E2E33_000950	E2E33_000950, MBF8416959.1	MA-13_genebank.gb_genome (77415/14/1)	gene	transcription antiterminator
E2E33_000955	E2E33_000955, MBF8416960.1	MA-13_genebank.gb_genome (77415/14/1)	gene	PTS glucose transporter subunit IIA
E2E33_000960	E2E33_000960, MBF8416961.1	MA-13_genebank.gb_genome (77415/14/1)	gene	dicarboxylate/amino acid:cation symporter
E2E33_000980	E2E33_000980, MBF8416964.1	MA-13_genebank.gb_genome (77415/14/1)	gene	two pore domain potassium channel family protein
E2E33_000985	2.5.1.17, E2E33_000985, MBF8416965.1	MA-13_genebank.gb_genome (77415/14/1)	gene	cob(I)yrinic acid a,c-diamide adenosyltransferase
E2E33_000990	E2E33_000990, MBF8416966.1, perR	MA-13_genebank.gb_genome (77415/14/1)	gene	peroxide-responsive transcriptional repressor PerR
E2E33_001005	2.2.1.6, E2E33_001005, MBF8416969.1, alsS	MA-13_genebank.gb_genome (77415/14/1)	gene	acetolactate synthase AlsS
E2E33_001010	4.1.1.5, E2E33_001010, MBF8416970.1, budA	MA-13_genebank.gb_genome (77415/14/1)	gene	acetolactate decarboxylase
E2E33_001015	E2E33_001015, MBF8416971.1	MA-13_genebank.gb_genome (77415/14/1)	gene	YgzB family protein
E2E33_001020	E2E33_001020, MBF8416972.1	MA-13_genebank.gb_genome (77415/14/1)	gene	hypothetical protein
E2E33_001040	E2E33_001040, MBF8416975.1, csrA	MA-13_genebank.gb_genome (77415/14/1)	gene	carbon storage regulator CsrA
E2E33_001045	E2E33_001045, MBF8416976.1, fliW	MA-13_genebank.gb_genome (77415/14/1)	gene	flagellar assembly protein FliW
E2E33_001050	E2E33_001050, MBF8416977.1, flgL	MA-13_genebank.gb_genome (77415/14/1)	gene	flagellar hook-associated protein FlgL
E2E33_001060	E2E33_001060, MBF8416979.1	MA-13_genebank.gb_genome (77415/14/1)	gene	flagellar protein FlgN
E2E33_001065	E2E33_001065, MBF8416980.1, flgM	MA-13_genebank.gb_genome (77415/14/1)	gene	flagellar biosynthesis anti-sigma factor FlgM
E2E33_001070	E2E33_001070, MBF8416981.1	MA-13_genebank.gb_genome (77415/14/1)	gene	hypothetical protein
E2E33_001075	E2E33_001075, MBF8416982.1	MA-13_genebank.gb_genome (77415/14/1)	gene	ComF family protein
E2E33_001085	E2E33_001085, MBF8416984.1	MA-13_genebank.gb_genome (77415/14/1)	gene	DegV family protein
E2E33_001090	E2E33_001090, MBF8416985.1	MA-13_genebank.gb_genome (77415/14/1)	gene	amino acid permease
E2E33_001095	E2E33_001095, MBF8416986.1	MA-13_genebank.gb_genome (77415/14/1)	gene	response regulator transcription factor
E2E33_001100	E2E33_001100, MBF8416987.1	MA-13_genebank.gb_genome (77415/14/1)	gene	sensor histidine kinase
E2E33_001105	E2E33_001105, MBF8416988.1	MA-13_genebank.gb_genome (77415/14/1)	gene	YigZ family protein
E2E33_001110	E2E33_001110, MBF8416989.1	MA-13_genebank.gb_genome (77415/14/1)	gene	undecaprenyl/decaprenyl-phosphate alpha-N-acetylglucosaminyl 1-phosphate transferase
E2E33_001115	E2E33_001115, MBF8416990.1	MA-13_genebank.gb_genome (77415/14/1)	gene	penicillin-binding transpeptidase domain-containing protein
E2E33_001140	E2E33_001140, MBF8416994.1	MA-13_genebank.gb_genome (77415/14/1)	gene	peptidase M30, hyicolysin
E2E33_001220	3.4.11.4, E2E33_001220, MBF8417007.1, pepT	MA-13_genebank.gb_genome (77415/14/1)	gene	peptidase T
E2E33_001225	E2E33_001225, MBF8417008.1	MA-13_genebank.gb_genome (77415/14/1)	gene	glycosyltransferase family 8 protein
E2E33_001230	E2E33_001230, MBF8417009.1	MA-13_genebank.gb_genome (77415/14/1)	gene	MATE family efflux transporter
E2E33_001235	E2E33_001235, MBF8417010.1	MA-13_genebank.gb_genome (77415/14/1)	gene	ParM/StbA family protein
E2E33_001240	E2E33_001240, MBF8417011.1	MA-13_genebank.gb_genome (77415/14/1)	gene	hypothetical protein
E2E33_001245	E2E33_001245, MBF8417012.1	MA-13_genebank.gb_genome (77415/14/1)	gene	ABC transporter ATP-binding protein
E2E33_001250	E2E33_001250, MBF8417013.1	MA-13_genebank.gb_genome (77415/14/1)	gene	methionine ABC transporter ATP-binding protein
E2E33_001255	E2E33_001255, MBF8417014.1	MA-13_genebank.gb_genome (77415/14/1)	gene	ABC transporter permease
E2E33_001260	E2E33_001260, MBF8417015.1	MA-13_genebank.gb_genome (77415/14/1)	gene	MetQ/NlpA family ABC transporter substrate-binding protein
E2E33_001270	2.6.1.42, E2E33_001270, MBF8417017.1	MA-13_genebank.gb_genome (77415/14/1)	gene	branched-chain amino acid aminotransferase
E2E33_001280	E2E33_001280, MBF8417019.1	MA-13_genebank.gb_genome (77415/14/1)	gene	threonine/serine exporter family protein
E2E33_001310	E2E33_001310, MBF8417025.1	MA-13_genebank.gb_genome (77415/14/1)	gene	PTS glucose transporter subunit IIA
E2E33_001315	E2E33_001315, MBF8417026.1	MA-13_genebank.gb_genome (77415/14/1)	gene	glutathione peroxidase
E2E33_001320	E2E33_001320, MBF8417027.1	MA-13_genebank.gb_genome (77415/14/1)	gene	LysE family transporter
E2E33_001330	E2E33_001330, MBF8417029.1	MA-13_genebank.gb_genome (77415/14/1)	gene	fructose bisphosphate aldolase
E2E33_001335	E2E33_001335, MBF8417030.1	MA-13_genebank.gb_genome (77415/14/1)	gene	ABC transporter ATP-binding protein
E2E33_001345	E2E33_001345, MBF8417032.1	MA-13_genebank.gb_genome (77415/14/1)	gene	ABC transporter permease
E2E33_001350	E2E33_001350, MBF8417033.1	MA-13_genebank.gb_genome (77415/14/1)	gene	TetR/AcrR family transcriptional regulator
E2E33_001355	E2E33_001355, MBF8417034.1	MA-13_genebank.gb_genome (77415/14/1)	gene	amino acid permease
E2E33_001385	E2E33_001385, MBF8417040.1	MA-13_genebank.gb_genome (77415/14/1)	gene	GNAT family N-acetyltransferase
E2E33_001390	E2E33_001390, MBF8417041.1	MA-13_genebank.gb_genome (77415/14/1)	gene	FAD-dependent oxidoreductase
E2E33_001395	E2E33_001395, MBF8417042.1, spoVG	MA-13_genebank.gb_genome (77415/14/1)	gene	septation regulator SpoVG
E2E33_001400	E2E33_001400, MBF8417043.1	MA-13_genebank.gb_genome (77415/14/1)	gene	RidA family protein
E2E33_001405	E2E33_001405, MBF8417044.1, purR	MA-13_genebank.gb_genome (77415/14/1)	gene	pur operon repressor
E2E33_001410	2.7.1.148, E2E33_001410, MBF8417045.1	MA-13_genebank.gb_genome (77415/14/1)	gene	4-(cytidine 5'-diphospho)-2-C-methyl-D-erythritol kinase
E2E33_001415	E2E33_001415, MBF8417046.1	MA-13_genebank.gb_genome (77415/14/1)	gene	small, acid-soluble spore protein, alpha/beta type
E2E33_001420	E2E33_001420, MBF8417047.1	MA-13_genebank.gb_genome (77415/14/1)	gene	Veg family protein
E2E33_001425	E2E33_001425, MBF8417048.1, yabG	MA-13_genebank.gb_genome (77415/14/1)	gene	sporulation peptidase YabG
E2E33_001430	2.1.1.182, E2E33_001430, MBF8417049.1, rsmA	MA-13_genebank.gb_genome (77415/14/1)	gene	16S rRNA (adenine(1518)-N(6)/adenine(1519)-N(6))- dimethyltransferase RsmA
E2E33_001435	3.1.26.8, E2E33_001435, MBF8417050.1, rnmV	MA-13_genebank.gb_genome (77415/14/1)	gene	ribonuclease M5
E2E33_001440	E2E33_001440, MBF8417051.1	MA-13_genebank.gb_genome (77415/14/1)	gene	TatD family hydrolase
E2E33_001445	6.1.1.10, E2E33_001445, MBF8417052.1, metG	MA-13_genebank.gb_genome (77415/14/1)	gene	methionine--tRNA ligase
E2E33_001450	E2E33_001450, MBF8417053.1	MA-13_genebank.gb_genome (77415/14/1)	gene	AbrB/MazE/SpoVT family DNA-binding domain-containing protein
E2E33_001455	2.1.1.198, E2E33_001455, MBF8417054.1, rsmI	MA-13_genebank.gb_genome (77415/14/1)	gene	16S rRNA (cytidine(1402)-2'-O)-methyltransferase
E2E33_001460	E2E33_001460, MBF8417055.1	MA-13_genebank.gb_genome (77415/14/1)	gene	GIY-YIG nuclease family protein
E2E33_001465	E2E33_001465, MBF8417056.1	MA-13_genebank.gb_genome (77415/14/1)	gene	tRNA1(Val) (adenine(37)-N6)-methyltransferase
E2E33_001470	E2E33_001470, MBF8417057.1, yabA	MA-13_genebank.gb_genome (77415/14/1)	gene	DNA replication initiation control protein YabA
E2E33_001475	E2E33_001475, MBF8417058.1	MA-13_genebank.gb_genome (77415/14/1)	gene	stage 0 sporulation family protein
E2E33_001480	2.7.7.7, E2E33_001480, MBF8417059.1, holB	MA-13_genebank.gb_genome (77415/14/1)	gene	DNA polymerase III subunit delta'
E2E33_001485	E2E33_001485, MBF8417060.1	MA-13_genebank.gb_genome (77415/14/1)	gene	YaaR family protein
E2E33_001490	E2E33_001490, MBF8417061.1	MA-13_genebank.gb_genome (77415/14/1)	gene	cyclic-di-AMP receptor
E2E33_001495	2.7.4.9, E2E33_001495, MBF8417062.1	MA-13_genebank.gb_genome (77415/14/1)	gene	dTMP kinase
E2E33_001500	E2E33_001500, MBF8417063.1	MA-13_genebank.gb_genome (77415/14/1)	gene	aminotransferase class V-fold PLP-dependent enzyme
E2E33_001505	6.1.1.14, E2E33_001505, MBF8417064.1	MA-13_genebank.gb_genome (77415/14/1)	gene	glycine--tRNA ligase
E2E33_001515	3.6.1.27, E2E33_001515, MBF8417066.1	MA-13_genebank.gb_genome (77415/14/1)	gene	undecaprenyl-diphosphate phosphatase
E2E33_001520	E2E33_001520, MBF8417067.1	MA-13_genebank.gb_genome (77415/14/1)	gene	twin-arginine translocase TatA/TatE family subunit
E2E33_001525	E2E33_001525, MBF8417068.1	MA-13_genebank.gb_genome (77415/14/1)	gene	AI-2E family transporter
E2E33_001530	E2E33_001530, MBF8417069.1	MA-13_genebank.gb_genome (77415/14/1)	gene	amino acid ABC transporter ATP-binding protein
E2E33_001540	E2E33_001540, MBF8417071.1	MA-13_genebank.gb_genome (77415/14/1)	gene	transporter substrate-binding domain-containing protein
E2E33_001545	E2E33_001545, MBF8417072.1	MA-13_genebank.gb_genome (77415/14/1)	gene	amino acid ABC transporter permease
E2E33_001550	E2E33_001550, MBF8417073.1	MA-13_genebank.gb_genome (77415/14/1)	gene	amino acid ABC transporter permease
E2E33_001555	E2E33_001555, MBF8417074.1	MA-13_genebank.gb_genome (77415/14/1)	gene	GntR family transcriptional regulator
E2E33_001590	E2E33_001590, MBF8417080.1	MA-13_genebank.gb_genome (77415/14/1)	gene	manganese efflux pump
E2E33_001595	E2E33_001595, MBF8417081.1	MA-13_genebank.gb_genome (77415/14/1)	gene	threonylcarbamoyl-AMP synthase
E2E33_001600	E2E33_001600, MBF8417082.1, spoIIR	MA-13_genebank.gb_genome (77415/14/1)	gene	stage II sporulation protein R
E2E33_001605	2.1.1.297, E2E33_001605, MBF8417083.1, prmC	MA-13_genebank.gb_genome (77415/14/1)	gene	peptide chain release factor N(5)-glutamine methyltransferase
E2E33_001610	E2E33_001610, MBF8417084.1, prfA	MA-13_genebank.gb_genome (77415/14/1)	gene	peptide chain release factor 1
E2E33_001615	E2E33_001615, MBF8417085.1	MA-13_genebank.gb_genome (77415/14/1)	gene	hypothetical protein
E2E33_001620	2.7.1.21, E2E33_001620, MBF8417086.1	MA-13_genebank.gb_genome (77415/14/1)	gene	thymidine kinase
E2E33_001625	E2E33_001625, MBF8417087.1, rpmE	MA-13_genebank.gb_genome (77415/14/1)	gene	50S ribosomal protein L31
E2E33_001630	E2E33_001630, MBF8417088.1, rho	MA-13_genebank.gb_genome (77415/14/1)	gene	transcription termination factor Rho
E2E33_001640	2.5.1.7, E2E33_001640, MBF8417090.1	MA-13_genebank.gb_genome (77415/14/1)	gene	UDP-N-acetylglucosamine 1-carboxyvinyltransferase
E2E33_001645	E2E33_001645, MBF8417091.1, fsa	MA-13_genebank.gb_genome (77415/14/1)	gene	fructose-6-phosphate aldolase
E2E33_001650	4.1.2.13, E2E33_001650, MBF8417092.1	MA-13_genebank.gb_genome (77415/14/1)	gene	fructose-bisphosphate aldolase
E2E33_001655	E2E33_001655, MBF8417093.1	MA-13_genebank.gb_genome (77415/14/1)	gene	response regulator
E2E33_001660	E2E33_001660, MBF8417094.1	MA-13_genebank.gb_genome (77415/14/1)	gene	hypothetical protein
E2E33_001665	E2E33_001665, MBF8417095.1	MA-13_genebank.gb_genome (77415/14/1)	gene	hypothetical protein
E2E33_001670	E2E33_001670, MBF8417096.1	MA-13_genebank.gb_genome (77415/14/1)	gene	ABC transporter ATP-binding protein
E2E33_001675	E2E33_001675, MBF8417097.1	MA-13_genebank.gb_genome (77415/14/1)	gene	GntR family transcriptional regulator
E2E33_001680	6.3.4.2, E2E33_001680, MBF8417098.1	MA-13_genebank.gb_genome (77415/14/1)	gene	CTP synthase
E2E33_001725	E2E33_001725, MBF8417104.1	MA-13_genebank.gb_genome (77415/14/1)	gene	STAS domain-containing protein
E2E33_001735	E2E33_001735, MBF8417105.1	MA-13_genebank.gb_genome (77415/14/1)	gene	YqhV family protein
E2E33_001740	E2E33_001740, MBF8417106.1	MA-13_genebank.gb_genome (77415/14/1)	gene	aromatic acid exporter family protein
E2E33_001745	E2E33_001745, MBF8417107.1	MA-13_genebank.gb_genome (77415/14/1)	gene	MurR/RpiR family transcriptional regulator
E2E33_001755	4.2.1.126, E2E33_001755, MBF8417109.1, murQ	MA-13_genebank.gb_genome (77415/14/1)	gene	N-acetylmuramic acid 6-phosphate etherase
E2E33_001760	E2E33_001760, MBF8417110.1	MA-13_genebank.gb_genome (77415/14/1)	gene	DUF871 domain-containing protein
E2E33_001775	E2E33_001775, MBF8417113.1, ctaD	MA-13_genebank.gb_genome (77415/14/1)	gene	cytochrome c oxidase subunit I
E2E33_001785	2.5.1.-, E2E33_001785, MBF8417115.1	MA-13_genebank.gb_genome (77415/14/1)	gene	protoheme IX farnesyltransferase
E2E33_001790	E2E33_001790, MBF8417116.1	MA-13_genebank.gb_genome (77415/14/1)	gene	heme A synthase
E2E33_001795	E2E33_001795, MBF8417117.1	MA-13_genebank.gb_genome (77415/14/1)	gene	FtsW/RodA/SpoVE family cell cycle protein
E2E33_001800	E2E33_001800, MBF8417118.1	MA-13_genebank.gb_genome (77415/14/1)	gene	YlaN family protein
E2E33_001830	E2E33_001830, MBF8417122.1	MA-13_genebank.gb_genome (77415/14/1)	gene	CDP-glycerol glycerophosphotransferase family protein
E2E33_001855	E2E33_001855, MBF8417126.1	MA-13_genebank.gb_genome (77415/14/1)	gene	Bax inhibitor-1/YccA family protein
E2E33_001860	2.1.1.14, E2E33_001860, MBF8417127.1	MA-13_genebank.gb_genome (77415/14/1)	gene	5-methyltetrahydropteroyltriglutamate-- homocysteine S-methyltransferase
E2E33_001865	E2E33_001865, MBF8417128.1	MA-13_genebank.gb_genome (77415/14/1)	gene	OFA family MFS transporter
E2E33_001870	E2E33_001870, MBF8417129.1	MA-13_genebank.gb_genome (77415/14/1)	gene	response regulator transcription factor
E2E33_001875	E2E33_001875, MBF8417130.1	MA-13_genebank.gb_genome (77415/14/1)	gene	sensor histidine kinase
E2E33_001880	E2E33_001880, MBF8417131.1	MA-13_genebank.gb_genome (77415/14/1)	gene	asparaginase
E2E33_001895	2.3.1.157, 2.7.7.23, E2E33_001895, MBF8417132.1, glmU	MA-13_genebank.gb_genome (77415/14/1)	gene	bifunctional UDP-N-acetylglucosamine diphosphorylase/glucosamine-1-phosphate N-acetyltransferase GlmU
E2E33_001900	2.7.6.1, E2E33_001900, MBF8417133.1	MA-13_genebank.gb_genome (77415/14/1)	gene	ribose-phosphate diphosphokinase
E2E33_001905	E2E33_001905, MBF8417134.1	MA-13_genebank.gb_genome (77415/14/1)	gene	50S ribosomal protein L25/general stress protein Ctc
E2E33_001910	3.1.1.29, E2E33_001910, MBF8417135.1	MA-13_genebank.gb_genome (77415/14/1)	gene	aminoacyl-tRNA hydrolase
E2E33_001915	E2E33_001915, MBF8417136.1	MA-13_genebank.gb_genome (77415/14/1)	gene	anti-sigma-F factor Fin family protein
E2E33_001920	E2E33_001920, MBF8417137.1, mfd	MA-13_genebank.gb_genome (77415/14/1)	gene	transcription-repair coupling factor
E2E33_001925	E2E33_001925, MBF8417138.1, spoVT	MA-13_genebank.gb_genome (77415/14/1)	gene	stage V sporulation protein T
E2E33_001930	E2E33_001930, MBF8417139.1	MA-13_genebank.gb_genome (77415/14/1)	gene	polysaccharide biosynthesis protein
E2E33_001935	E2E33_001935, MBF8417140.1	MA-13_genebank.gb_genome (77415/14/1)	gene	MazG family protein
E2E33_001940	E2E33_001940, MBF8417141.1	MA-13_genebank.gb_genome (77415/14/1)	gene	RNA-binding S4 domain-containing protein
E2E33_001945	E2E33_001945, MBF8417142.1, yabP	MA-13_genebank.gb_genome (77415/14/1)	gene	sporulation protein YabP
E2E33_001950	E2E33_001950, MBF8417143.1, yabQ	MA-13_genebank.gb_genome (77415/14/1)	gene	spore cortex biosynthesis protein YabQ
E2E33_001955	E2E33_001955, MBF8417144.1	MA-13_genebank.gb_genome (77415/14/1)	gene	septum formation initiator family protein
E2E33_001960	E2E33_001960, MBF8417145.1	MA-13_genebank.gb_genome (77415/14/1)	gene	RNA-binding protein S1
E2E33_001975	E2E33_001975, MBF8417147.1	MA-13_genebank.gb_genome (77415/14/1)	gene	VWA domain-containing protein
E2E33_001980	E2E33_001980, MBF8417148.1	MA-13_genebank.gb_genome (77415/14/1)	gene	protein kinase family protein
E2E33_001985	6.3.4.19, E2E33_001985, MBF8417149.1, tilS	MA-13_genebank.gb_genome (77415/14/1)	gene	tRNA lysidine(34) synthetase TilS
E2E33_001990	2.4.2.8, E2E33_001990, MBF8417150.1, hpt	MA-13_genebank.gb_genome (77415/14/1)	gene	hypoxanthine phosphoribosyltransferase
E2E33_002000	E2E33_002000, MBF8417152.1	MA-13_genebank.gb_genome (77415/14/1)	gene	type III pantothenate kinase
E2E33_002010	2.5.1.47, E2E33_002010, MBF8417154.1, cysK	MA-13_genebank.gb_genome (77415/14/1)	gene	cysteine synthase A
E2E33_002015	2.5.1.15, E2E33_002015, MBF8417155.1, folP	MA-13_genebank.gb_genome (77415/14/1)	gene	dihydropteroate synthase
E2E33_002020	4.1.2.25, E2E33_002020, MBF8417156.1, folB	MA-13_genebank.gb_genome (77415/14/1)	gene	dihydroneopterin aldolase
E2E33_002025	2.7.6.3, E2E33_002025, MBF8417157.1, folK	MA-13_genebank.gb_genome (77415/14/1)	gene	2-amino-4-hydroxy-6- hydroxymethyldihydropteridine diphosphokinase
E2E33_002030	6.1.1.6, E2E33_002030, MBF8417158.1, lysS	MA-13_genebank.gb_genome (77415/14/1)	gene	lysine--tRNA ligase
E2E33_002040	E2E33_002040, MBF8417159.1, cax	MA-13_genebank.gb_genome (77415/14/1)	gene	calcium/proton exchanger
E2E33_002045	E2E33_002045, MBF8417160.1	MA-13_genebank.gb_genome (77415/14/1)	gene	YfkD family protein
E2E33_002050	E2E33_002050, MBF8417161.1	MA-13_genebank.gb_genome (77415/14/1)	gene	hypothetical protein
E2E33_002055	E2E33_002055, MBF8417162.1, pdaA	MA-13_genebank.gb_genome (77415/14/1)	gene	delta-lactam-biosynthetic de-N-acetylase
E2E33_002060	E2E33_002060, MBF8417163.1	MA-13_genebank.gb_genome (77415/14/1)	gene	DNA-3-methyladenine glycosylase 2 family protein
E2E33_002070	E2E33_002070, MBF8417165.1	MA-13_genebank.gb_genome (77415/14/1)	gene	MarR family transcriptional regulator
E2E33_002075	E2E33_002075, MBF8417166.1	MA-13_genebank.gb_genome (77415/14/1)	gene	ABC transporter ATP-binding protein
E2E33_002085	E2E33_002085, MBF8417168.1	MA-13_genebank.gb_genome (77415/14/1)	gene	tRNA-dihydrouridine synthase
E2E33_002090	E2E33_002090, MBF8417169.1	MA-13_genebank.gb_genome (77415/14/1)	gene	zinc ribbon domain-containing protein
E2E33_002105	E2E33_002105, MBF8417172.1	MA-13_genebank.gb_genome (77415/14/1)	gene	PH domain-containing protein
E2E33_002110	E2E33_002110, MBF8417173.1	MA-13_genebank.gb_genome (77415/14/1)	gene	DUF456 domain-containing protein
E2E33_002115	E2E33_002115, MBF8417174.1	MA-13_genebank.gb_genome (77415/14/1)	gene	L-cystine transporter
E2E33_002120	E2E33_002120, MBF8417175.1	MA-13_genebank.gb_genome (77415/14/1)	gene	hypothetical protein
E2E33_002165	E2E33_002165, MBF8417184.1	MA-13_genebank.gb_genome (77415/14/1)	gene	YhgE/Pip domain-containing protein
E2E33_002240	E2E33_002240, MBF8417197.1	MA-13_genebank.gb_genome (77415/14/1)	gene	MFS transporter
E2E33_002245	E2E33_002245, MBF8417198.1	MA-13_genebank.gb_genome (77415/14/1)	gene	cell wall hydrolase
E2E33_002255	E2E33_002255, MBF8417200.1	MA-13_genebank.gb_genome (77415/14/1)	gene	PTS beta-glucoside transporter subunit IIBCA
E2E33_002275	1.8.1.2, E2E33_002275, MBF8417202.1	MA-13_genebank.gb_genome (77415/14/1)	gene	assimilatory sulfite reductase (NADPH) flavoprotein subunit
E2E33_002280	1.8.1.2, E2E33_002280, MBF8417203.1, cysI	MA-13_genebank.gb_genome (77415/14/1)	gene	assimilatory sulfite reductase (NADPH) hemoprotein subunit
E2E33_002285	E2E33_002285, MBF8417204.1	MA-13_genebank.gb_genome (77415/14/1)	gene	hypothetical protein
E2E33_002300	E2E33_002300, MBF8417206.1	MA-13_genebank.gb_genome (77415/14/1)	gene	dipeptidase
E2E33_002310	E2E33_002310, MBF8417208.1	MA-13_genebank.gb_genome (77415/14/1)	gene	thiamine pyrophosphate-dependent dehydrogenase E1 component subunit alpha
E2E33_002320	E2E33_002320, MBF8417210.1	MA-13_genebank.gb_genome (77415/14/1)	gene	2-oxo acid dehydrogenase subunit E2
E2E33_002325	1.8.1.4, E2E33_002325, MBF8417211.1, lpdA	MA-13_genebank.gb_genome (77415/14/1)	gene	dihydrolipoyl dehydrogenase
E2E33_002335	E2E33_002335, MBF8417213.1	MA-13_genebank.gb_genome (77415/14/1)	gene	mechanosensitive ion channel
E2E33_002340	E2E33_002340, MBF8417214.1	MA-13_genebank.gb_genome (77415/14/1)	gene	MBL fold metallo-hydrolase
E2E33_002350	E2E33_002350, MBF8417216.1	MA-13_genebank.gb_genome (77415/14/1)	gene	O-acetyl-ADP-ribose deacetylase
E2E33_002355	E2E33_002355, MBF8417217.1	MA-13_genebank.gb_genome (77415/14/1)	gene	H-type small acid-soluble spore protein
E2E33_002360	E2E33_002360, MBF8417218.1	MA-13_genebank.gb_genome (77415/14/1)	gene	3-hydroxyacyl-CoA dehydrogenase
E2E33_002370	E2E33_002370, MBF8417219.1	MA-13_genebank.gb_genome (77415/14/1)	gene	helix-turn-helix transcriptional regulator
E2E33_002375	E2E33_002375, MBF8417220.1	MA-13_genebank.gb_genome (77415/14/1)	gene	HAD family hydrolase
E2E33_002380	E2E33_002380, MBF8417221.1	MA-13_genebank.gb_genome (77415/14/1)	gene	DUF420 domain-containing protein
E2E33_002385	E2E33_002385, MBF8417222.1	MA-13_genebank.gb_genome (77415/14/1)	gene	hypothetical protein
E2E33_002390	E2E33_002390, MBF8417223.1	MA-13_genebank.gb_genome (77415/14/1)	gene	aminodeoxychorismate lyase
E2E33_002395	E2E33_002395, MBF8417224.1	MA-13_genebank.gb_genome (77415/14/1)	gene	L-lactate dehydrogenase
E2E33_002420	E2E33_002420, MBF8417229.1	MA-13_genebank.gb_genome (77415/14/1)	gene	queuosine precursor transporter
E2E33_002425	1.7.1.13, E2E33_002425, MBF8417230.1, queF	MA-13_genebank.gb_genome (77415/14/1)	gene	NADPH-dependent 7-cyano-7-deazaguanine reductase QueF
E2E33_002435	3.2.1.1, E2E33_002435, MBF8417231.1	MA-13_genebank.gb_genome (77415/14/1)	gene	alpha-amylase
E2E33_002445	E2E33_002445, MBF8417232.1	MA-13_genebank.gb_genome (77415/14/1)	gene	STAS domain-containing protein
E2E33_002450	E2E33_002450, MBF8417233.1	MA-13_genebank.gb_genome (77415/14/1)	gene	saccharopine dehydrogenase family protein
E2E33_002455	4.1.1.96, E2E33_002455, MBF8417234.1, nspC	MA-13_genebank.gb_genome (77415/14/1)	gene	carboxynorspermidine decarboxylase
E2E33_002460	E2E33_002460, MBF8417235.1	MA-13_genebank.gb_genome (77415/14/1)	gene	DUF1611 domain-containing protein
E2E33_002465	E2E33_002465, MBF8417236.1	MA-13_genebank.gb_genome (77415/14/1)	gene	alanine/ornithine racemase family PLP-dependent enzyme
E2E33_002470	E2E33_002470, MBF8417237.1	MA-13_genebank.gb_genome (77415/14/1)	gene	cysteine ABC transporter substrate-binding protein
E2E33_002475	E2E33_002475, MBF8417238.1	MA-13_genebank.gb_genome (77415/14/1)	gene	amino acid ABC transporter ATP-binding protein
E2E33_002480	E2E33_002480, MBF8417239.1	MA-13_genebank.gb_genome (77415/14/1)	gene	amino acid ABC transporter permease
E2E33_002485	E2E33_002485, MBF8417240.1	MA-13_genebank.gb_genome (77415/14/1)	gene	amino acid ABC transporter permease
E2E33_002525	2.1.1.177, E2E33_002525, MBF8417246.1, rlmH	MA-13_genebank.gb_genome (77415/14/1)	gene	23S rRNA (pseudouridine(1915)-N(3))-methyltransferase RlmH
E2E33_002530	E2E33_002530, MBF8417247.1	MA-13_genebank.gb_genome (77415/14/1)	gene	trypsin-like peptidase domain-containing protein
E2E33_002535	E2E33_002535, MBF8417248.1	MA-13_genebank.gb_genome (77415/14/1)	gene	MBL fold metallo-hydrolase
E2E33_002545	E2E33_002545, MBF8417250.1	MA-13_genebank.gb_genome (77415/14/1)	gene	hypothetical protein
E2E33_002550	E2E33_002550, MBF8417251.1, walK	MA-13_genebank.gb_genome (77415/14/1)	gene	cell wall metabolism sensor histidine kinase WalK
E2E33_002555	E2E33_002555, MBF8417252.1	MA-13_genebank.gb_genome (77415/14/1)	gene	response regulator transcription factor
E2E33_002620	E2E33_002620, MBF8417263.1	MA-13_genebank.gb_genome (77415/14/1)	gene	sugar transferase
E2E33_002625	2.7.7.9, E2E33_002625, MBF8417264.1, galU	MA-13_genebank.gb_genome (77415/14/1)	gene	UTP--glucose-1-phosphate uridylyltransferase GalU
E2E33_002630	E2E33_002630, MBF8417265.1	MA-13_genebank.gb_genome (77415/14/1)	gene	tyrosine protein phosphatase
E2E33_002635	E2E33_002635, MBF8417266.1	MA-13_genebank.gb_genome (77415/14/1)	gene	CpsD/CapB family tyrosine-protein kinase
E2E33_002640	E2E33_002640, MBF8417267.1	MA-13_genebank.gb_genome (77415/14/1)	gene	capsular biosynthesis protein
E2E33_002645	E2E33_002645, MBF8417268.1	MA-13_genebank.gb_genome (77415/14/1)	gene	hypothetical protein
E2E33_002655	E2E33_002655, MBF8417269.1	MA-13_genebank.gb_genome (77415/14/1)	gene	competence protein ComK
E2E33_002660	E2E33_002660, MBF8417270.1	MA-13_genebank.gb_genome (77415/14/1)	gene	CsbD family protein
E2E33_002665	2.1.1.13, E2E33_002665, MBF8417271.1, metH	MA-13_genebank.gb_genome (77415/14/1)	gene	methionine synthase
E2E33_002675	E2E33_002675, MBF8417273.1	MA-13_genebank.gb_genome (77415/14/1)	gene	LCP family protein
E2E33_002685	E2E33_002685, MBF8417275.1	MA-13_genebank.gb_genome (77415/14/1)	gene	DedA family protein
E2E33_002690	E2E33_002690, MBF8417276.1	MA-13_genebank.gb_genome (77415/14/1)	gene	VTT domain-containing protein
E2E33_002695	E2E33_002695, MBF8417277.1	MA-13_genebank.gb_genome (77415/14/1)	gene	helix-turn-helix transcriptional regulator
E2E33_002710	6.3.5.2, E2E33_002710, MBF8417280.1, guaA	MA-13_genebank.gb_genome (77415/14/1)	gene	glutamine-hydrolyzing GMP synthase
E2E33_002715	6.3.1.5, E2E33_002715, MBF8417281.1, nadE	MA-13_genebank.gb_genome (77415/14/1)	gene	ammonia-dependent NAD(+) synthetase
E2E33_002720	6.3.4.21, E2E33_002720, MBF8417282.1	MA-13_genebank.gb_genome (77415/14/1)	gene	nicotinate phosphoribosyltransferase
E2E33_002725	E2E33_002725, MBF8417283.1	MA-13_genebank.gb_genome (77415/14/1)	gene	cysteine hydrolase
E2E33_002730	E2E33_002730, MBF8417284.1	MA-13_genebank.gb_genome (77415/14/1)	gene	dipeptide epimerase
E2E33_002735	E2E33_002735, MBF8417285.1	MA-13_genebank.gb_genome (77415/14/1)	gene	hypothetical protein
E2E33_002745	E2E33_002745, MBF8417287.1	MA-13_genebank.gb_genome (77415/14/1)	gene	GtrA family protein
E2E33_002750	E2E33_002750, MBF8417288.1, groL	MA-13_genebank.gb_genome (77415/14/1)	gene	chaperonin GroEL
E2E33_002755	E2E33_002755, MBF8417289.1, groES	MA-13_genebank.gb_genome (77415/14/1)	gene	co-chaperone GroES
E2E33_002760	E2E33_002760, MBF8417290.1	MA-13_genebank.gb_genome (77415/14/1)	gene	CPBP family intramembrane metalloprotease
E2E33_002770	E2E33_002770, MBF8417292.1, tatC	MA-13_genebank.gb_genome (77415/14/1)	gene	twin-arginine translocase subunit TatC
E2E33_002775	E2E33_002775, MBF8417293.1	MA-13_genebank.gb_genome (77415/14/1)	gene	redox-sensing transcriptional repressor Rex
E2E33_002780	E2E33_002780, MBF8417294.1	MA-13_genebank.gb_genome (77415/14/1)	gene	ABC-F family ATP-binding cassette domain-containing protein
E2E33_002785	2.3.1.234, E2E33_002785, MBF8417295.1, tsaD	MA-13_genebank.gb_genome (77415/14/1)	gene	tRNA (adenosine(37)-N6)-threonylcarbamoyltransferase complex transferase subunit TsaD
E2E33_002790	E2E33_002790, MBF8417296.1, rimI	MA-13_genebank.gb_genome (77415/14/1)	gene	ribosomal protein S18-alanine N-acetyltransferase
E2E33_002795	E2E33_002795, MBF8417297.1, tsaB	MA-13_genebank.gb_genome (77415/14/1)	gene	tRNA (adenosine(37)-N6)-threonylcarbamoyltransferase complex dimerization subunit type 1 TsaB
E2E33_002800	E2E33_002800, MBF8417298.1, tsaE	MA-13_genebank.gb_genome (77415/14/1)	gene	tRNA (adenosine(37)-N6)-threonylcarbamoyltransferase complex ATPase subunit type 1 TsaE
E2E33_002820	3.4.21.88, E2E33_002820, MBF8417300.1, lexA	MA-13_genebank.gb_genome (77415/14/1)	gene	transcriptional repressor LexA
E2E33_002825	E2E33_002825, MBF8417301.1	MA-13_genebank.gb_genome (77415/14/1)	gene	LysM peptidoglycan-binding domain-containing protein
E2E33_002830	E2E33_002830, MBF8417302.1	MA-13_genebank.gb_genome (77415/14/1)	gene	recombinase family protein
E2E33_002835	E2E33_002835, MBF8417303.1	MA-13_genebank.gb_genome (77415/14/1)	gene	DUF896 domain-containing protein
E2E33_002840	2.2.1.1, E2E33_002840, MBF8417304.1, tkt	MA-13_genebank.gb_genome (77415/14/1)	gene	transketolase
E2E33_002845	E2E33_002845, MBF8417305.1, sirA	MA-13_genebank.gb_genome (77415/14/1)	gene	sporulation inhibitor of replication protein SirA
E2E33_002850	E2E33_002850, MBF8417306.1	MA-13_genebank.gb_genome (77415/14/1)	gene	YneF family protein
E2E33_002855	E2E33_002855, MBF8417307.1	MA-13_genebank.gb_genome (77415/14/1)	gene	cytochrome C biogenesis protein CcdA
E2E33_002860	E2E33_002860, MBF8417308.1	MA-13_genebank.gb_genome (77415/14/1)	gene	response regulator
E2E33_002865	E2E33_002865, MBF8417309.1	MA-13_genebank.gb_genome (77415/14/1)	gene	cytochrome c biogenesis protein CcdC
E2E33_002870	E2E33_002870, MBF8417310.1	MA-13_genebank.gb_genome (77415/14/1)	gene	DUF2621 domain-containing protein
E2E33_002875	E2E33_002875, MBF8417311.1	MA-13_genebank.gb_genome (77415/14/1)	gene	1-acyl-sn-glycerol-3-phosphate acyltransferase
E2E33_002880	3.4.16.4, E2E33_002880, MBF8417312.1, dacB	MA-13_genebank.gb_genome (77415/14/1)	gene	D-alanyl-D-alanine carboxypeptidase/D-alanyl-D-alanine-endopeptidase
E2E33_002885	E2E33_002885, MBF8417313.1	MA-13_genebank.gb_genome (77415/14/1)	gene	LD-carboxypeptidase
E2E33_002895	E2E33_002895, MBF8417315.1	MA-13_genebank.gb_genome (77415/14/1)	gene	cold-shock protein
E2E33_002900	E2E33_002900, MBF8417316.1	MA-13_genebank.gb_genome (77415/14/1)	gene	hypothetical protein
E2E33_002915	1.8.4.8, E2E33_002915, MBF8417319.1	MA-13_genebank.gb_genome (77415/14/1)	gene	phosphoadenylyl-sulfate reductase
E2E33_002920	2.1.1.107, E2E33_002920, MBF8417320.1, cobA	MA-13_genebank.gb_genome (77415/14/1)	gene	uroporphyrinogen-III C-methyltransferase
E2E33_002925	E2E33_002925, MBF8417321.1	MA-13_genebank.gb_genome (77415/14/1)	gene	sirohydrochlorin chelatase
E2E33_002930	E2E33_002930, MBF8417322.1	MA-13_genebank.gb_genome (77415/14/1)	gene	NAD(P)-binding protein
E2E33_002935	E2E33_002935, MBF8417323.1	MA-13_genebank.gb_genome (77415/14/1)	gene	YbaK/EbsC family protein
E2E33_002940	E2E33_002940, MBF8417324.1	MA-13_genebank.gb_genome (77415/14/1)	gene	glycerol dehydrogenase
E2E33_002945	E2E33_002945, MBF8417325.1	MA-13_genebank.gb_genome (77415/14/1)	gene	arylamine N-acetyltransferase
E2E33_002955	E2E33_002955, MBF8417326.1	MA-13_genebank.gb_genome (77415/14/1)	gene	general stress protein
E2E33_002960	E2E33_002960, MBF8417327.1	MA-13_genebank.gb_genome (77415/14/1)	gene	hypothetical protein
E2E33_002965	6.3.5.-, E2E33_002965, MBF8417328.1, gatB	MA-13_genebank.gb_genome (77415/14/1)	gene	Asp-tRNA(Asn)/Glu-tRNA(Gln) amidotransferase subunit GatB
E2E33_002975	6.3.5.-, E2E33_002975, MBF8417330.1, gatC	MA-13_genebank.gb_genome (77415/14/1)	gene	Asp-tRNA(Asn)/Glu-tRNA(Gln) amidotransferase subunit GatC
E2E33_002980	4.1.3.1, E2E33_002980, MBF8417331.1, aceA	MA-13_genebank.gb_genome (77415/14/1)	gene	isocitrate lyase
E2E33_002985	2.3.3.9, E2E33_002985, MBF8417332.1, aceB	MA-13_genebank.gb_genome (77415/14/1)	gene	malate synthase A
E2E33_002990	E2E33_002990, MBF8417333.1, rplT	MA-13_genebank.gb_genome (77415/14/1)	gene	50S ribosomal protein L20
E2E33_002995	E2E33_002995, MBF8417334.1, rpmI	MA-13_genebank.gb_genome (77415/14/1)	gene	50S ribosomal protein L35
E2E33_003000	E2E33_003000, MBF8417335.1, infC	MA-13_genebank.gb_genome (77415/14/1)	gene	translation initiation factor IF-3
E2E33_003010	E2E33_003010, MBF8417336.1	MA-13_genebank.gb_genome (77415/14/1)	gene	SDR family oxidoreductase
E2E33_003015	E2E33_003015, MBF8417337.1	MA-13_genebank.gb_genome (77415/14/1)	gene	replication-associated recombination protein A
E2E33_003020	E2E33_003020, MBF8417338.1	MA-13_genebank.gb_genome (77415/14/1)	gene	tRNA threonylcarbamoyladenosine dehydratase
E2E33_003025	E2E33_003025, MBF8417339.1	MA-13_genebank.gb_genome (77415/14/1)	gene	bile acid:sodium symporter family protein
E2E33_003035	6.1.1.12, E2E33_003035, MBF8417340.1, aspS	MA-13_genebank.gb_genome (77415/14/1)	gene	aspartate--tRNA ligase
E2E33_003040	6.1.1.21, E2E33_003040, MBF8417341.1	MA-13_genebank.gb_genome (77415/14/1)	gene	histidine--tRNA ligase
E2E33_003050	E2E33_003050, MBF8417343.1	MA-13_genebank.gb_genome (77415/14/1)	gene	N-acetylmuramoyl-L-alanine amidase
E2E33_003055	E2E33_003055, MBF8417344.1	MA-13_genebank.gb_genome (77415/14/1)	gene	DHA2 family efflux MFS transporter permease subunit
E2E33_003060	E2E33_003060, MBF8417345.1	MA-13_genebank.gb_genome (77415/14/1)	gene	HlyD family efflux transporter periplasmic adaptor subunit
E2E33_003065	E2E33_003065, MBF8417346.1	MA-13_genebank.gb_genome (77415/14/1)	gene	MarR family transcriptional regulator
E2E33_003070	3.1.1.96, E2E33_003070, MBF8417347.1	MA-13_genebank.gb_genome (77415/14/1)	gene	D-tyrosyl-tRNA(Tyr) deacylase
E2E33_003075	E2E33_003075, MBF8417348.1	MA-13_genebank.gb_genome (77415/14/1)	gene	bifunctional (p)ppGpp synthetase/guanosine-3',5'-bis(diphosphate) 3'-pyrophosphohydrolase
E2E33_003080	2.4.2.7, E2E33_003080, MBF8417349.1	MA-13_genebank.gb_genome (77415/14/1)	gene	adenine phosphoribosyltransferase
E2E33_003085	E2E33_003085, MBF8417350.1, recJ	MA-13_genebank.gb_genome (77415/14/1)	gene	single-stranded-DNA-specific exonuclease RecJ
E2E33_003095	1.8.1.9, E2E33_003095, MBF8417352.1, trxB	MA-13_genebank.gb_genome (77415/14/1)	gene	thioredoxin-disulfide reductase
E2E33_003100	E2E33_003100, MBF8417353.1	MA-13_genebank.gb_genome (77415/14/1)	gene	tetratricopeptide repeat protein
E2E33_003105	E2E33_003105, MBF8417354.1	MA-13_genebank.gb_genome (77415/14/1)	gene	acyltransferase
E2E33_003110	3.6.1.1, E2E33_003110, MBF8417355.1, ppaX	MA-13_genebank.gb_genome (77415/14/1)	gene	pyrophosphatase PpaX
E2E33_003115	2.4.99.-, E2E33_003115, MBF8417356.1	MA-13_genebank.gb_genome (77415/14/1)	gene	prolipoprotein diacylglyceryl transferase
E2E33_003120	2.7.1.-, E2E33_003120, MBF8417357.1	MA-13_genebank.gb_genome (77415/14/1)	gene	HPr kinase/phosphorylase
E2E33_003125	E2E33_003125, MBF8417358.1	MA-13_genebank.gb_genome (77415/14/1)	gene	phage holin family protein
E2E33_003130	E2E33_003130, MBF8417359.1	MA-13_genebank.gb_genome (77415/14/1)	gene	DUF4097 domain-containing protein
E2E33_003140	E2E33_003140, MBF8417361.1	MA-13_genebank.gb_genome (77415/14/1)	gene	ABC transporter permease
E2E33_003145	E2E33_003145, MBF8417362.1	MA-13_genebank.gb_genome (77415/14/1)	gene	CDP-glycerol glycerophosphotransferase family protein
E2E33_003150	E2E33_003150, MBF8417363.1	MA-13_genebank.gb_genome (77415/14/1)	gene	CDP-glycerol glycerophosphotransferase family protein
E2E33_003165	E2E33_003165, MBF8417364.1	MA-13_genebank.gb_genome (77415/14/1)	gene	DsbA family oxidoreductase
E2E33_003170	E2E33_003170, MBF8417365.1	MA-13_genebank.gb_genome (77415/14/1)	gene	DUF2179 domain-containing protein
E2E33_003175	E2E33_003175, MBF8417366.1	MA-13_genebank.gb_genome (77415/14/1)	gene	NETI motif-containing protein
E2E33_003180	4.1.1.21, 5.4.99.18, E2E33_003180, MBF8417367.1, purE	MA-13_genebank.gb_genome (77415/14/1)	gene	5-(carboxyamino)imidazole ribonucleotide mutase
E2E33_003185	6.3.4.18, E2E33_003185, MBF8417368.1, purK	MA-13_genebank.gb_genome (77415/14/1)	gene	5-(carboxyamino)imidazole ribonucleotide synthase
E2E33_003190	4.3.2.2, E2E33_003190, MBF8417369.1, purB	MA-13_genebank.gb_genome (77415/14/1)	gene	adenylosuccinate lyase
E2E33_003195	6.3.2.6, E2E33_003195, MBF8417370.1	MA-13_genebank.gb_genome (77415/14/1)	gene	phosphoribosylaminoimidazolesuccinocarboxamide synthase
E2E33_003200	6.3.5.3, E2E33_003200, MBF8417371.1, purS	MA-13_genebank.gb_genome (77415/14/1)	gene	phosphoribosylformylglycinamidine synthase subunit PurS
E2E33_003205	E2E33_003205, MBF8417372.1, purQ	MA-13_genebank.gb_genome (77415/14/1)	gene	phosphoribosylformylglycinamidine synthase subunit PurQ
E2E33_003210	6.3.5.3, E2E33_003210, MBF8417373.1, purL	MA-13_genebank.gb_genome (77415/14/1)	gene	phosphoribosylformylglycinamidine synthase subunit PurL
E2E33_003215	2.4.2.14, E2E33_003215, MBF8417374.1	MA-13_genebank.gb_genome (77415/14/1)	gene	amidophosphoribosyltransferase
E2E33_003220	6.3.3.1, E2E33_003220, MBF8417375.1	MA-13_genebank.gb_genome (77415/14/1)	gene	phosphoribosylformylglycinamidine cyclo-ligase
E2E33_003225	2.1.2.2, E2E33_003225, MBF8417376.1, purN	MA-13_genebank.gb_genome (77415/14/1)	gene	phosphoribosylglycinamide formyltransferase
E2E33_003230	2.1.2.3, 3.5.4.10, E2E33_003230, MBF8417377.1, purH	MA-13_genebank.gb_genome (77415/14/1)	gene	bifunctional phosphoribosylaminoimidazolecarboxamide formyltransferase/IMP cyclohydrolase
E2E33_003235	6.3.4.13, E2E33_003235, MBF8417378.1, purD	MA-13_genebank.gb_genome (77415/14/1)	gene	phosphoribosylamine--glycine ligase
E2E33_003240	E2E33_003240, MBF8417379.1	MA-13_genebank.gb_genome (77415/14/1)	gene	DUF2892 domain-containing protein
E2E33_003245	E2E33_003245, MBF8417380.1	MA-13_genebank.gb_genome (77415/14/1)	gene	adenine deaminase
E2E33_003250	E2E33_003250, MBF8417381.1	MA-13_genebank.gb_genome (77415/14/1)	gene	DUF3048 domain-containing protein
E2E33_003255	E2E33_003255, MBF8417382.1	MA-13_genebank.gb_genome (77415/14/1)	gene	hypothetical protein
E2E33_003260	2.5.1.n9, E2E33_003260, MBF8417383.1	MA-13_genebank.gb_genome (77415/14/1)	gene	heptaprenylglyceryl phosphate synthase
E2E33_003265	E2E33_003265, MBF8417384.1	MA-13_genebank.gb_genome (77415/14/1)	gene	UvrD-helicase domain-containing protein
E2E33_003275	E2E33_003275, MBF8417385.1	MA-13_genebank.gb_genome (77415/14/1)	gene	UvrD-helicase domain-containing protein
E2E33_003280	6.5.1.2, E2E33_003280, MBF8417386.1, ligA	MA-13_genebank.gb_genome (77415/14/1)	gene	NAD-dependent DNA ligase LigA
E2E33_003285	E2E33_003285, MBF8417387.1	MA-13_genebank.gb_genome (77415/14/1)	gene	CamS family sex pheromone protein
E2E33_003290	E2E33_003290, MBF8417388.1, sufB	MA-13_genebank.gb_genome (77415/14/1)	gene	Fe-S cluster assembly protein SufB
E2E33_003295	E2E33_003295, MBF8417389.1	MA-13_genebank.gb_genome (77415/14/1)	gene	SUF system NifU family Fe-S cluster assembly protein
E2E33_003300	E2E33_003300, MBF8417390.1	MA-13_genebank.gb_genome (77415/14/1)	gene	cysteine desulfurase
E2E33_003305	E2E33_003305, MBF8417391.1, sufD	MA-13_genebank.gb_genome (77415/14/1)	gene	Fe-S cluster assembly protein SufD
E2E33_003310	E2E33_003310, MBF8417392.1, sufC	MA-13_genebank.gb_genome (77415/14/1)	gene	Fe-S cluster assembly ATPase SufC
E2E33_003315	E2E33_003315, MBF8417393.1	MA-13_genebank.gb_genome (77415/14/1)	gene	hypothetical protein
E2E33_003320	E2E33_003320, MBF8417394.1	MA-13_genebank.gb_genome (77415/14/1)	gene	thioredoxin family protein
E2E33_003325	E2E33_003325, MBF8417395.1, gcvH	MA-13_genebank.gb_genome (77415/14/1)	gene	glycine cleavage system protein GcvH
E2E33_003330	E2E33_003330, MBF8417396.1	MA-13_genebank.gb_genome (77415/14/1)	gene	arsenate reductase family protein
E2E33_003335	E2E33_003335, MBF8417397.1	MA-13_genebank.gb_genome (77415/14/1)	gene	acyl-CoA dehydrogenase family protein
E2E33_003340	2.3.1.9, E2E33_003340, MBF8417398.1	MA-13_genebank.gb_genome (77415/14/1)	gene	acetyl-CoA C-acetyltransferase
E2E33_003355	E2E33_003355, MBF8417401.1	MA-13_genebank.gb_genome (77415/14/1)	gene	hypothetical protein
E2E33_003360	E2E33_003360, MBF8417402.1	MA-13_genebank.gb_genome (77415/14/1)	gene	spore coat protein
E2E33_003365	E2E33_003365, MBF8417403.1	MA-13_genebank.gb_genome (77415/14/1)	gene	rod shape-determining protein RodA
E2E33_003370	E2E33_003370, MBF8417404.1	MA-13_genebank.gb_genome (77415/14/1)	gene	thioredoxin family protein
E2E33_003375	E2E33_003375, MBF8417405.1	MA-13_genebank.gb_genome (77415/14/1)	gene	phospholipase D family protein
E2E33_003385	E2E33_003385, MBF8417407.1	MA-13_genebank.gb_genome (77415/14/1)	gene	efflux RND transporter permease subunit
E2E33_003390	E2E33_003390, MBF8417408.1	MA-13_genebank.gb_genome (77415/14/1)	gene	EAL domain-containing protein
E2E33_003395	E2E33_003395, MBF8417409.1	MA-13_genebank.gb_genome (77415/14/1)	gene	catalase
E2E33_003405	E2E33_003405, MBF8417411.1	MA-13_genebank.gb_genome (77415/14/1)	gene	polysaccharide deacetylase family protein
E2E33_003410	E2E33_003410, MBF8417412.1	MA-13_genebank.gb_genome (77415/14/1)	gene	glycosyltransferase
E2E33_003415	E2E33_003415, MBF8417413.1	MA-13_genebank.gb_genome (77415/14/1)	gene	hypothetical protein
E2E33_003420	E2E33_003420, MBF8417414.1	MA-13_genebank.gb_genome (77415/14/1)	gene	zf-HC2 domain-containing protein
E2E33_003425	E2E33_003425, MBF8417415.1	MA-13_genebank.gb_genome (77415/14/1)	gene	sigma-70 family RNA polymerase sigma factor
E2E33_003430	E2E33_003430, MBF8417416.1	MA-13_genebank.gb_genome (77415/14/1)	gene	galactosyldiacylglycerol synthase
E2E33_003435	E2E33_003435, MBF8417417.1	MA-13_genebank.gb_genome (77415/14/1)	gene	glycosyltransferase family 39 protein
E2E33_003445	E2E33_003445, MBF8417418.1	MA-13_genebank.gb_genome (77415/14/1)	gene	peptidoglycan DD-metalloendopeptidase family protein
E2E33_003450	E2E33_003450, MBF8417419.1	MA-13_genebank.gb_genome (77415/14/1)	gene	HAMP domain-containing protein
E2E33_003455	E2E33_003455, MBF8417420.1	MA-13_genebank.gb_genome (77415/14/1)	gene	response regulator transcription factor
E2E33_003460	E2E33_003460, MBF8417421.1, ccsB	MA-13_genebank.gb_genome (77415/14/1)	gene	c-type cytochrome biogenesis protein CcsB
E2E33_003470	E2E33_003470, MBF8417423.1, resA	MA-13_genebank.gb_genome (77415/14/1)	gene	thiol-disulfide oxidoreductase ResA
E2E33_003475	E2E33_003475, MBF8417424.1	MA-13_genebank.gb_genome (77415/14/1)	gene	rRNA pseudouridine synthase
E2E33_003480	E2E33_003480, MBF8417425.1	MA-13_genebank.gb_genome (77415/14/1)	gene	spore maturation protein
E2E33_003485	E2E33_003485, MBF8417426.1	MA-13_genebank.gb_genome (77415/14/1)	gene	spore maturation protein
E2E33_003490	E2E33_003490, MBF8417427.1	MA-13_genebank.gb_genome (77415/14/1)	gene	D-alanyl-D-alanine carboxypeptidase
E2E33_003495	E2E33_003495, MBF8417428.1, scpB	MA-13_genebank.gb_genome (77415/14/1)	gene	SMC-Scp complex subunit ScpB
E2E33_003500	E2E33_003500, MBF8417429.1	MA-13_genebank.gb_genome (77415/14/1)	gene	segregation/condensation protein A
E2E33_003510	E2E33_003510, MBF8417431.1	MA-13_genebank.gb_genome (77415/14/1)	gene	GNAT family N-acetyltransferase
E2E33_003515	4.1.1.20, E2E33_003515, MBF8417432.1, lysA	MA-13_genebank.gb_genome (77415/14/1)	gene	diaminopimelate decarboxylase
E2E33_003520	E2E33_003520, MBF8417433.1	MA-13_genebank.gb_genome (77415/14/1)	gene	spore germination protein
E2E33_003525	E2E33_003525, MBF8417434.1	MA-13_genebank.gb_genome (77415/14/1)	gene	stage V sporulation protein AE
E2E33_003530	E2E33_003530, MBF8417435.1	MA-13_genebank.gb_genome (77415/14/1)	gene	stage V sporulation protein AB
E2E33_003535	E2E33_003535, MBF8417436.1	MA-13_genebank.gb_genome (77415/14/1)	gene	stage V sporulation protein AA
E2E33_003540	E2E33_003540, MBF8417437.1, sigF	MA-13_genebank.gb_genome (77415/14/1)	gene	RNA polymerase sporulation sigma factor SigF
E2E33_003545	2.7.11.1, E2E33_003545, MBF8417438.1	MA-13_genebank.gb_genome (77415/14/1)	gene	anti-sigma F factor
E2E33_003550	E2E33_003550, MBF8417439.1, spoIIAA	MA-13_genebank.gb_genome (77415/14/1)	gene	anti-sigma F factor antagonist
E2E33_003555	E2E33_003555, MBF8417440.1	MA-13_genebank.gb_genome (77415/14/1)	gene	D-alanyl-D-alanine carboxypeptidase
E2E33_003560	E2E33_003560, MBF8417441.1, xerD	MA-13_genebank.gb_genome (77415/14/1)	gene	site-specific tyrosine recombinase XerD
E2E33_003565	E2E33_003565, MBF8417442.1	MA-13_genebank.gb_genome (77415/14/1)	gene	YqzK family protein
E2E33_003570	E2E33_003570, MBF8417443.1	MA-13_genebank.gb_genome (77415/14/1)	gene	transcriptional repressor
E2E33_003575	E2E33_003575, MBF8417444.1, spoIIM	MA-13_genebank.gb_genome (77415/14/1)	gene	stage II sporulation protein M
E2E33_003580	E2E33_003580, MBF8417445.1	MA-13_genebank.gb_genome (77415/14/1)	gene	TIGR00375 family protein
E2E33_003585	E2E33_003585, MBF8417446.1	MA-13_genebank.gb_genome (77415/14/1)	gene	NUDIX hydrolase
E2E33_003595	E2E33_003595, MBF8417448.1	MA-13_genebank.gb_genome (77415/14/1)	gene	aldo/keto reductase
E2E33_003600	E2E33_003600, MBF8417449.1	MA-13_genebank.gb_genome (77415/14/1)	gene	YqkE family protein
E2E33_003605	E2E33_003605, MBF8417450.1	MA-13_genebank.gb_genome (77415/14/1)	gene	5-bromo-4-chloroindolyl phosphate hydrolysis family protein
E2E33_003610	E2E33_003610, MBF8417451.1	MA-13_genebank.gb_genome (77415/14/1)	gene	toxic anion resistance protein
E2E33_003620	E2E33_003620, MBF8417453.1	MA-13_genebank.gb_genome (77415/14/1)	gene	alpha/beta hydrolase
E2E33_003625	E2E33_003625, MBF8417454.1	MA-13_genebank.gb_genome (77415/14/1)	gene	LysM peptidoglycan-binding domain-containing protein
E2E33_003630	E2E33_003630, MBF8417455.1	MA-13_genebank.gb_genome (77415/14/1)	gene	YolD-like family protein
E2E33_003635	E2E33_003635, MBF8417456.1	MA-13_genebank.gb_genome (77415/14/1)	gene	DNA polymerase IV
E2E33_003640	E2E33_003640, MBF8417457.1	MA-13_genebank.gb_genome (77415/14/1)	gene	SDR family oxidoreductase
E2E33_003645	1.5.1.2, E2E33_003645, MBF8417458.1	MA-13_genebank.gb_genome (77415/14/1)	gene	pyrroline-5-carboxylate reductase
E2E33_003650	3.1.26.11, E2E33_003650, MBF8417459.1	MA-13_genebank.gb_genome (77415/14/1)	gene	ribonuclease Z
E2E33_003690	E2E33_003690, MBF8417467.1	MA-13_genebank.gb_genome (77415/14/1)	gene	aldo/keto reductase
E2E33_003695	E2E33_003695, MBF8417468.1	MA-13_genebank.gb_genome (77415/14/1)	gene	hypothetical protein
E2E33_003700	E2E33_003700, MBF8417469.1	MA-13_genebank.gb_genome (77415/14/1)	gene	LCP family protein
E2E33_003710	E2E33_003710, MBF8417471.1	MA-13_genebank.gb_genome (77415/14/1)	gene	APC family permease
E2E33_003800	E2E33_003800, MBF8417487.1	MA-13_genebank.gb_genome (77415/14/1)	gene	purine/pyrimidine permease
E2E33_003805	E2E33_003805, MBF8417488.1	MA-13_genebank.gb_genome (77415/14/1)	gene	sulfite exporter TauE/SafE family protein
E2E33_003810	E2E33_003810, MBF8417489.1	MA-13_genebank.gb_genome (77415/14/1)	gene	amino acid permease
E2E33_003815	1.5.1.38, E2E33_003815, MBF8417490.1, nfsA	MA-13_genebank.gb_genome (77415/14/1)	gene	oxygen-insensitive NADPH nitroreductase
E2E33_003860	E2E33_003860, MBF8417499.1	MA-13_genebank.gb_genome (77415/14/1)	gene	PTS sugar transporter subunit IIC
E2E33_003865	2.7.1.121, E2E33_003865, MBF8417500.1, dhaK	MA-13_genebank.gb_genome (77415/14/1)	gene	dihydroxyacetone kinase subunit DhaK
E2E33_003870	E2E33_003870, MBF8417501.1, dhaL	MA-13_genebank.gb_genome (77415/14/1)	gene	dihydroxyacetone kinase subunit L
E2E33_003875	E2E33_003875, MBF8417502.1	MA-13_genebank.gb_genome (77415/14/1)	gene	PTS-dependent dihydroxyacetone kinase phosphotransferase subunit DhaM
E2E33_003890	E2E33_003890, MBF8417505.1	MA-13_genebank.gb_genome (77415/14/1)	gene	YwnF family protein
E2E33_003900	E2E33_003900, MBF8417506.1	MA-13_genebank.gb_genome (77415/14/1)	gene	hypothetical protein
E2E33_003905	E2E33_003905, MBF8417507.1, rlmN	MA-13_genebank.gb_genome (77415/14/1)	gene	23S rRNA (adenine(2503)-C(2))-methyltransferase RlmN
E2E33_003910	E2E33_003910, MBF8417508.1	MA-13_genebank.gb_genome (77415/14/1)	gene	sugar porter family MFS transporter
E2E33_003915	E2E33_003915, MBF8417509.1	MA-13_genebank.gb_genome (77415/14/1)	gene	PTS glucose transporter subunit IIA
E2E33_003920	E2E33_003920, MBF8417510.1	MA-13_genebank.gb_genome (77415/14/1)	gene	nitrous oxide-stimulated promoter family protein
E2E33_003925	3.1.3.23, E2E33_003925, MBF8417511.1, yidA	MA-13_genebank.gb_genome (77415/14/1)	gene	sugar-phosphatase
E2E33_003930	E2E33_003930, MBF8417512.1	MA-13_genebank.gb_genome (77415/14/1)	gene	hypothetical protein
E2E33_003935	E2E33_003935, MBF8417513.1	MA-13_genebank.gb_genome (77415/14/1)	gene	hemerythrin domain-containing protein
E2E33_003945	E2E33_003945, MBF8417515.1	MA-13_genebank.gb_genome (77415/14/1)	gene	DeoR/GlpR transcriptional regulator
E2E33_003955	E2E33_003955, MBF8417517.1	MA-13_genebank.gb_genome (77415/14/1)	gene	Na+/H+ antiporter
E2E33_003960	E2E33_003960, MBF8417518.1	MA-13_genebank.gb_genome (77415/14/1)	gene	excisionase family DNA-binding protein
E2E33_003970	5.3.3.2, E2E33_003970, MBF8417519.1	MA-13_genebank.gb_genome (77415/14/1)	gene	type 2 isopentenyl-diphosphate Delta-isomerase
E2E33_003975	E2E33_003975, MBF8417520.1	MA-13_genebank.gb_genome (77415/14/1)	gene	DoxX family protein
E2E33_003980	E2E33_003980, MBF8417521.1	MA-13_genebank.gb_genome (77415/14/1)	gene	nitroreductase family protein
E2E33_003985	E2E33_003985, MBF8417522.1	MA-13_genebank.gb_genome (77415/14/1)	gene	SNF2 helicase associated domain-containing protein
E2E33_004070	E2E33_004070, MBF8417537.1	MA-13_genebank.gb_genome (77415/14/1)	gene	DUF1002 domain-containing protein
E2E33_004075	E2E33_004075, MBF8417538.1	MA-13_genebank.gb_genome (77415/14/1)	gene	hypothetical protein
E2E33_004080	E2E33_004080, MBF8417539.1	MA-13_genebank.gb_genome (77415/14/1)	gene	hypothetical protein
E2E33_004085	E2E33_004085, MBF8417540.1	MA-13_genebank.gb_genome (77415/14/1)	gene	hypothetical protein
E2E33_004090	E2E33_004090, MBF8417541.1	MA-13_genebank.gb_genome (77415/14/1)	gene	response regulator transcription factor
E2E33_004105	E2E33_004105, MBF8417543.1	MA-13_genebank.gb_genome (77415/14/1)	gene	carbonic anhydrase
E2E33_004115	4.4.1.21, E2E33_004115, MBF8417544.1	MA-13_genebank.gb_genome (77415/14/1)	gene	S-ribosylhomocysteine lyase
E2E33_004120	E2E33_004120, MBF8417545.1	MA-13_genebank.gb_genome (77415/14/1)	gene	cysteine synthase family protein
E2E33_004125	E2E33_004125, MBF8417546.1	MA-13_genebank.gb_genome (77415/14/1)	gene	bifunctional cystathionine gamma-lyase/homocysteine desulfhydrase
E2E33_004130	E2E33_004130, MBF8417547.1	MA-13_genebank.gb_genome (77415/14/1)	gene	NfeD family protein
E2E33_004135	E2E33_004135, MBF8417548.1	MA-13_genebank.gb_genome (77415/14/1)	gene	flotillin family protein
E2E33_004145	E2E33_004145, MBF8417550.1	MA-13_genebank.gb_genome (77415/14/1)	gene	acyl-CoA thioesterase
E2E33_004150	E2E33_004150, MBF8417551.1	MA-13_genebank.gb_genome (77415/14/1)	gene	TraR/DksA C4-type zinc finger protein
E2E33_004155	E2E33_004155, MBF8417552.1	MA-13_genebank.gb_genome (77415/14/1)	gene	MFS transporter
E2E33_004160	E2E33_004160, MBF8417553.1	MA-13_genebank.gb_genome (77415/14/1)	gene	DUF488 family protein
E2E33_004170	E2E33_004170, MBF8417555.1	MA-13_genebank.gb_genome (77415/14/1)	gene	DUF1992 domain-containing protein
E2E33_004175	E2E33_004175, MBF8417556.1, motA	MA-13_genebank.gb_genome (77415/14/1)	gene	flagellar motor stator protein MotA
E2E33_004185	E2E33_004185, MBF8417558.1	MA-13_genebank.gb_genome (77415/14/1)	gene	type 1 glutamine amidotransferase
E2E33_004190	3.4.11.18, E2E33_004190, MBF8417559.1, map	MA-13_genebank.gb_genome (77415/14/1)	gene	type I methionyl aminopeptidase
E2E33_004195	E2E33_004195, MBF8417560.1	MA-13_genebank.gb_genome (77415/14/1)	gene	DUF1128 domain-containing protein
E2E33_004200	E2E33_004200, MBF8417561.1	MA-13_genebank.gb_genome (77415/14/1)	gene	YihY/virulence factor BrkB family protein
E2E33_004205	E2E33_004205, MBF8417562.1	MA-13_genebank.gb_genome (77415/14/1)	gene	MFS transporter
E2E33_004210	E2E33_004210, MBF8417563.1	MA-13_genebank.gb_genome (77415/14/1)	gene	YndM family protein
E2E33_004215	E2E33_004215, MBF8417564.1	MA-13_genebank.gb_genome (77415/14/1)	gene	hypothetical protein
E2E33_004225	E2E33_004225, MBF8417565.1	MA-13_genebank.gb_genome (77415/14/1)	gene	metallophosphoesterase
E2E33_004230	3.6.1.66, E2E33_004230, MBF8417566.1	MA-13_genebank.gb_genome (77415/14/1)	gene	XTP/dITP diphosphatase
E2E33_004235	E2E33_004235, MBF8417567.1	MA-13_genebank.gb_genome (77415/14/1)	gene	GerMN domain-containing protein
E2E33_004255	5.1.1.3, E2E33_004255, MBF8417570.1, racE	MA-13_genebank.gb_genome (77415/14/1)	gene	glutamate racemase
E2E33_004260	E2E33_004260, MBF8417571.1	MA-13_genebank.gb_genome (77415/14/1)	gene	MarR family transcriptional regulator
E2E33_004280	E2E33_004280, MBF8417575.1	MA-13_genebank.gb_genome (77415/14/1)	gene	response regulator transcription factor
E2E33_004285	E2E33_004285, MBF8417576.1	MA-13_genebank.gb_genome (77415/14/1)	gene	acyl-CoA thioesterase
E2E33_004290	E2E33_004290, MBF8417577.1, sdhB	MA-13_genebank.gb_genome (77415/14/1)	gene	succinate dehydrogenase iron-sulfur subunit
E2E33_004295	E2E33_004295, MBF8417578.1, sdhA	MA-13_genebank.gb_genome (77415/14/1)	gene	succinate dehydrogenase flavoprotein subunit
E2E33_004300	E2E33_004300, MBF8417579.1	MA-13_genebank.gb_genome (77415/14/1)	gene	succinate dehydrogenase cytochrome b558 subunit
E2E33_004305	E2E33_004305, MBF8417580.1	MA-13_genebank.gb_genome (77415/14/1)	gene	YslB family protein
E2E33_004310	2.7.2.4, E2E33_004310, MBF8417581.1	MA-13_genebank.gb_genome (77415/14/1)	gene	aspartate kinase
E2E33_004315	E2E33_004315, MBF8417582.1, uvrC	MA-13_genebank.gb_genome (77415/14/1)	gene	excinuclease ABC subunit UvrC
E2E33_004320	E2E33_004320, MBF8417583.1, trxA	MA-13_genebank.gb_genome (77415/14/1)	gene	thioredoxin
E2E33_004325	E2E33_004325, MBF8417584.1	MA-13_genebank.gb_genome (77415/14/1)	gene	electron transfer flavoprotein subunit alpha/FixB family protein
E2E33_004330	E2E33_004330, MBF8417585.1	MA-13_genebank.gb_genome (77415/14/1)	gene	electron transfer flavoprotein subunit beta/FixA family protein
E2E33_004335	4.2.1.17, E2E33_004335, MBF8417586.1	MA-13_genebank.gb_genome (77415/14/1)	gene	enoyl-CoA hydratase
E2E33_004340	E2E33_004340, MBF8417587.1	MA-13_genebank.gb_genome (77415/14/1)	gene	TetR/AcrR family transcriptional regulator
E2E33_004345	E2E33_004345, MBF8417588.1	MA-13_genebank.gb_genome (77415/14/1)	gene	AMP-binding protein
E2E33_004350	E2E33_004350, MBF8417589.1	MA-13_genebank.gb_genome (77415/14/1)	gene	endonuclease MutS2
E2E33_004365	E2E33_004365, MBF8417592.1, zapA	MA-13_genebank.gb_genome (77415/14/1)	gene	cell division protein ZapA
E2E33_004370	3.1.26.4, E2E33_004370, MBF8417593.1	MA-13_genebank.gb_genome (77415/14/1)	gene	ribonuclease HIII
E2E33_004385	6.1.1.20, E2E33_004385, MBF8417596.1	MA-13_genebank.gb_genome (77415/14/1)	gene	phenylalanine--tRNA ligase subunit beta
E2E33_004390	6.1.1.20, E2E33_004390, MBF8417597.1, pheS	MA-13_genebank.gb_genome (77415/14/1)	gene	phenylalanine--tRNA ligase subunit alpha
E2E33_004405	E2E33_004405, MBF8417600.1	MA-13_genebank.gb_genome (77415/14/1)	gene	general stress protein
E2E33_004410	3.2.2.27, E2E33_004410, MBF8417601.1	MA-13_genebank.gb_genome (77415/14/1)	gene	uracil-DNA glycosylase
E2E33_004415	E2E33_004415, MBF8417602.1	MA-13_genebank.gb_genome (77415/14/1)	gene	YwdI family protein
E2E33_004420	E2E33_004420, MBF8417603.1	MA-13_genebank.gb_genome (77415/14/1)	gene	DUF423 domain-containing protein
E2E33_004425	E2E33_004425, MBF8417604.1, gerQ	MA-13_genebank.gb_genome (77415/14/1)	gene	spore coat protein GerQ
E2E33_004430	E2E33_004430, MBF8417605.1	MA-13_genebank.gb_genome (77415/14/1)	gene	heme-dependent peroxidase
E2E33_004435	2.3.1.8, E2E33_004435, MBF8417606.1, pta	MA-13_genebank.gb_genome (77415/14/1)	gene	phosphate acetyltransferase
E2E33_004440	E2E33_004440, MBF8417607.1	MA-13_genebank.gb_genome (77415/14/1)	gene	lipoate--protein ligase family protein
E2E33_004445	E2E33_004445, MBF8417608.1	MA-13_genebank.gb_genome (77415/14/1)	gene	RsfA family transcriptional regulator
E2E33_004450	E2E33_004450, MBF8417609.1	MA-13_genebank.gb_genome (77415/14/1)	gene	HD domain-containing protein
E2E33_004455	E2E33_004455, MBF8417610.1	MA-13_genebank.gb_genome (77415/14/1)	gene	YwgA family protein
E2E33_004460	5.3.2.6, E2E33_004460, MBF8417611.1	MA-13_genebank.gb_genome (77415/14/1)	gene	4-oxalocrotonate tautomerase
E2E33_004465	E2E33_004465, MBF8417612.1	MA-13_genebank.gb_genome (77415/14/1)	gene	site-2 protease family protein
E2E33_004470	E2E33_004470, MBF8417613.1	MA-13_genebank.gb_genome (77415/14/1)	gene	YwhD family protein
E2E33_004475	E2E33_004475, MBF8417614.1	MA-13_genebank.gb_genome (77415/14/1)	gene	penicillin-binding protein
E2E33_004480	3.5.3.11, E2E33_004480, MBF8417615.1, speB	MA-13_genebank.gb_genome (77415/14/1)	gene	agmatinase
E2E33_004485	E2E33_004485, MBF8417616.1	MA-13_genebank.gb_genome (77415/14/1)	gene	DUF1934 domain-containing protein
E2E33_004490	6.1.1.19, E2E33_004490, MBF8417617.1	MA-13_genebank.gb_genome (77415/14/1)	gene	arginine--tRNA ligase
E2E33_004495	E2E33_004495, MBF8417618.1, cls	MA-13_genebank.gb_genome (77415/14/1)	gene	cardiolipin synthase
E2E33_004500	E2E33_004500, MBF8417619.1	MA-13_genebank.gb_genome (77415/14/1)	gene	4Fe-4S dicluster domain-containing protein
E2E33_004520	E2E33_004520, MBF8417623.1	MA-13_genebank.gb_genome (77415/14/1)	gene	TetR/AcrR family transcriptional regulator
E2E33_004540	E2E33_004540, MBF8417625.1, noc	MA-13_genebank.gb_genome (77415/14/1)	gene	nucleoid occlusion protein
E2E33_004545	2.1.1.-, E2E33_004545, MBF8417626.1, rsmG	MA-13_genebank.gb_genome (77415/14/1)	gene	16S rRNA (guanine(527)-N(7))-methyltransferase RsmG
E2E33_004550	E2E33_004550, MBF8417627.1, mnmG	MA-13_genebank.gb_genome (77415/14/1)	gene	tRNA uridine-5-carboxymethylaminomethyl(34) synthesis enzyme MnmG
E2E33_004555	E2E33_004555, MBF8417628.1, mnmE	MA-13_genebank.gb_genome (77415/14/1)	gene	tRNA uridine-5-carboxymethylaminomethyl(34) synthesis GTPase MnmE
E2E33_004560	E2E33_004560, MBF8417629.1	MA-13_genebank.gb_genome (77415/14/1)	gene	protein jag
E2E33_004565	E2E33_004565, MBF8417630.1, yidC	MA-13_genebank.gb_genome (77415/14/1)	gene	membrane protein insertase YidC
E2E33_004570	3.1.26.5, E2E33_004570, MBF8417631.1, rnpA	MA-13_genebank.gb_genome (77415/14/1)	gene	ribonuclease P protein component
E2E33_004580	E2E33_004580, MBF8417633.1, dnaA	MA-13_genebank.gb_genome (77415/14/1)	gene	chromosomal replication initiator protein DnaA
E2E33_004585	2.7.7.7, E2E33_004585, MBF8417634.1, dnaN	MA-13_genebank.gb_genome (77415/14/1)	gene	DNA polymerase III subunit beta
E2E33_004590	E2E33_004590, MBF8417635.1, yaaA	MA-13_genebank.gb_genome (77415/14/1)	gene	S4 domain-containing protein YaaA
E2E33_004595	E2E33_004595, MBF8417636.1, recF	MA-13_genebank.gb_genome (77415/14/1)	gene	DNA replication/repair protein RecF
E2E33_004600	E2E33_004600, MBF8417637.1	MA-13_genebank.gb_genome (77415/14/1)	gene	DUF370 domain-containing protein
E2E33_004605	E2E33_004605, MBF8417638.1, gyrB	MA-13_genebank.gb_genome (77415/14/1)	gene	DNA topoisomerase (ATP-hydrolyzing) subunit B
E2E33_004610	E2E33_004610, MBF8417639.1, gyrA	MA-13_genebank.gb_genome (77415/14/1)	gene	DNA gyrase subunit A
E2E33_004615	E2E33_004615, MBF8417640.1	MA-13_genebank.gb_genome (77415/14/1)	gene	HD-GYP domain-containing protein
E2E33_004625	E2E33_004625, MBF8417641.1, brnQ	MA-13_genebank.gb_genome (77415/14/1)	gene	branched-chain amino acid transport system II carrier protein
E2E33_004630	4.2.1.9, E2E33_004630, MBF8417642.1, ilvD	MA-13_genebank.gb_genome (77415/14/1)	gene	dihydroxy-acid dehydratase
E2E33_004635	E2E33_004635, MBF8417643.1, ilvB	MA-13_genebank.gb_genome (77415/14/1)	gene	acetolactate synthase large subunit
E2E33_004640	2.2.1.6, E2E33_004640, MBF8417644.1, ilvN	MA-13_genebank.gb_genome (77415/14/1)	gene	acetolactate synthase small subunit
E2E33_004645	1.1.1.86, E2E33_004645, MBF8417645.1, ilvC	MA-13_genebank.gb_genome (77415/14/1)	gene	ketol-acid reductoisomerase
E2E33_004650	2.3.3.13, E2E33_004650, MBF8417646.1	MA-13_genebank.gb_genome (77415/14/1)	gene	2-isopropylmalate synthase
E2E33_004655	1.1.1.85, E2E33_004655, MBF8417647.1, leuB	MA-13_genebank.gb_genome (77415/14/1)	gene	3-isopropylmalate dehydrogenase
E2E33_004660	4.2.1.33, E2E33_004660, MBF8417648.1, leuC	MA-13_genebank.gb_genome (77415/14/1)	gene	3-isopropylmalate dehydratase large subunit
E2E33_004665	4.2.1.33, E2E33_004665, MBF8417649.1, leuD	MA-13_genebank.gb_genome (77415/14/1)	gene	3-isopropylmalate dehydratase small subunit
E2E33_004670	4.3.1.19, E2E33_004670, MBF8417650.1, ilvA	MA-13_genebank.gb_genome (77415/14/1)	gene	threonine ammonia-lyase
E2E33_004675	E2E33_004675, MBF8417651.1	MA-13_genebank.gb_genome (77415/14/1)	gene	HAD family hydrolase
E2E33_004680	E2E33_004680, MBF8417652.1	MA-13_genebank.gb_genome (77415/14/1)	gene	PTS sugar transporter subunit IIC
E2E33_004685	1.1.1.95, E2E33_004685, MBF8417653.1	MA-13_genebank.gb_genome (77415/14/1)	gene	phosphoglycerate dehydrogenase
E2E33_004690	E2E33_004690, MBF8417654.1	MA-13_genebank.gb_genome (77415/14/1)	gene	alanine--glyoxylate aminotransferase family protein
E2E33_004695	E2E33_004695, MBF8417655.1	MA-13_genebank.gb_genome (77415/14/1)	gene	D-2-hydroxyacid dehydrogenase
E2E33_004715	4.1.3.27, E2E33_004715, MBF8417658.1, trpE	MA-13_genebank.gb_genome (77415/14/1)	gene	anthranilate synthase component I
E2E33_004720	E2E33_004720, MBF8417659.1	MA-13_genebank.gb_genome (77415/14/1)	gene	aminodeoxychorismate/anthranilate synthase component II
E2E33_004725	2.4.2.18, E2E33_004725, MBF8417660.1, trpD	MA-13_genebank.gb_genome (77415/14/1)	gene	anthranilate phosphoribosyltransferase
E2E33_004730	4.1.1.48, 5.3.1.24, E2E33_004730, MBF8417661.1, trpCF	MA-13_genebank.gb_genome (77415/14/1)	gene	bifunctional indole-3-glycerol-phosphate synthase TrpC/phosphoribosylanthranilate isomerase TrpF
E2E33_004735	4.2.1.20, E2E33_004735, MBF8417662.1, trpB	MA-13_genebank.gb_genome (77415/14/1)	gene	tryptophan synthase subunit beta
E2E33_004745	4.2.1.20, E2E33_004745, MBF8417664.1	MA-13_genebank.gb_genome (77415/14/1)	gene	tryptophan synthase subunit alpha
E2E33_004750	E2E33_004750, MBF8417665.1	MA-13_genebank.gb_genome (77415/14/1)	gene	YfhD family protein
E2E33_004760	E2E33_004760, MBF8417667.1, recX	MA-13_genebank.gb_genome (77415/14/1)	gene	recombination regulator RecX
E2E33_004765	E2E33_004765, MBF8417668.1	MA-13_genebank.gb_genome (77415/14/1)	gene	YfhH family protein
E2E33_004770	E2E33_004770, MBF8417669.1	MA-13_genebank.gb_genome (77415/14/1)	gene	small, acid-soluble spore protein K
E2E33_004775	E2E33_004775, MBF8417670.1	MA-13_genebank.gb_genome (77415/14/1)	gene	metal-dependent hydrolase
E2E33_004780	E2E33_004780, MBF8417671.1, mutY	MA-13_genebank.gb_genome (77415/14/1)	gene	A/G-specific adenine glycosylase
E2E33_004790	1.4.1.13, E2E33_004790, MBF8417673.1, gltB	MA-13_genebank.gb_genome (77415/14/1)	gene	glutamate synthase large subunit
E2E33_004795	E2E33_004795, MBF8417674.1	MA-13_genebank.gb_genome (77415/14/1)	gene	LysR family transcriptional regulator
E2E33_004800	1.3.1.104, E2E33_004800, MBF8417675.1, fabL	MA-13_genebank.gb_genome (77415/14/1)	gene	enoyl-[acyl-carrier-protein] reductase FabL
E2E33_004805	E2E33_004805, MBF8417676.1	MA-13_genebank.gb_genome (77415/14/1)	gene	gamma-type small acid-soluble spore protein
E2E33_004810	E2E33_004810, MBF8417677.1	MA-13_genebank.gb_genome (77415/14/1)	gene	hypothetical protein
E2E33_004815	E2E33_004815, MBF8417678.1	MA-13_genebank.gb_genome (77415/14/1)	gene	DUF402 domain-containing protein
E2E33_004820	E2E33_004820, MBF8417679.1	MA-13_genebank.gb_genome (77415/14/1)	gene	ABC transporter ATP-binding protein
E2E33_004835	E2E33_004835, MBF8417682.1	MA-13_genebank.gb_genome (77415/14/1)	gene	CAP domain-containing protein
E2E33_004840	E2E33_004840, MBF8417683.1	MA-13_genebank.gb_genome (77415/14/1)	gene	PaaI family thioesterase
E2E33_004845	E2E33_004845, MBF8417684.1	MA-13_genebank.gb_genome (77415/14/1)	gene	YlbD family protein
E2E33_004850	E2E33_004850, MBF8417685.1	MA-13_genebank.gb_genome (77415/14/1)	gene	YlbE-like family protein
E2E33_004855	E2E33_004855, MBF8417686.1	MA-13_genebank.gb_genome (77415/14/1)	gene	hypothetical protein
E2E33_004870	E2E33_004870, MBF8417688.1	MA-13_genebank.gb_genome (77415/14/1)	gene	transposase
E2E33_004880	4.2.3.3, E2E33_004880, MBF8417689.1, mgsA	MA-13_genebank.gb_genome (77415/14/1)	gene	methylglyoxal synthase
E2E33_004900	6.3.3.2, E2E33_004900, MBF8417693.1	MA-13_genebank.gb_genome (77415/14/1)	gene	5-formyltetrahydrofolate cyclo-ligase
E2E33_004905	E2E33_004905, MBF8417694.1	MA-13_genebank.gb_genome (77415/14/1)	gene	MFS transporter
E2E33_004915	E2E33_004915, MBF8417696.1	MA-13_genebank.gb_genome (77415/14/1)	gene	AI-2E family transporter
E2E33_005165	E2E33_005165, MBF8417744.1	MA-13_genebank.gb_genome (77415/14/1)	gene	hypothetical protein
E2E33_005170	E2E33_005170, MBF8417745.1	MA-13_genebank.gb_genome (77415/14/1)	gene	alpha/beta-type small acid-soluble spore protein
E2E33_005175	E2E33_005175, MBF8417746.1	MA-13_genebank.gb_genome (77415/14/1)	gene	TerC family protein
E2E33_005180	E2E33_005180, MBF8417747.1	MA-13_genebank.gb_genome (77415/14/1)	gene	hypothetical protein
E2E33_005185	E2E33_005185, MBF8417748.1	MA-13_genebank.gb_genome (77415/14/1)	gene	peptide chain release factor 3
E2E33_005190	E2E33_005190, MBF8417749.1	MA-13_genebank.gb_genome (77415/14/1)	gene	PAS domain-containing protein
E2E33_005195	E2E33_005195, MBF8417750.1	MA-13_genebank.gb_genome (77415/14/1)	gene	Gfo/Idh/MocA family oxidoreductase
E2E33_005200	E2E33_005200, MBF8417751.1	MA-13_genebank.gb_genome (77415/14/1)	gene	DNA starvation/stationary phase protection protein
E2E33_005205	E2E33_005205, MBF8417752.1	MA-13_genebank.gb_genome (77415/14/1)	gene	sulfite exporter TauE/SafE family protein
E2E33_005210	1.14.12.17, E2E33_005210, MBF8417753.1, hmpA	MA-13_genebank.gb_genome (77415/14/1)	gene	NO-inducible flavohemoprotein
E2E33_005215	E2E33_005215, MBF8417754.1	MA-13_genebank.gb_genome (77415/14/1)	gene	Rrf2 family transcriptional regulator
E2E33_005220	E2E33_005220, MBF8417755.1	MA-13_genebank.gb_genome (77415/14/1)	gene	fumarylacetoacetate hydrolase
E2E33_005225	E2E33_005225, MBF8417756.1	MA-13_genebank.gb_genome (77415/14/1)	gene	MFS transporter
E2E33_004935	E2E33_004935, MBF8417699.1	MA-13_genebank.gb_genome (77415/14/1)	gene	peptidyl-prolyl cis-trans isomerase
E2E33_004940	E2E33_004940, MBF8417700.1	MA-13_genebank.gb_genome (77415/14/1)	gene	PhoH family protein
E2E33_004950	E2E33_004950, MBF8417702.1, typA	MA-13_genebank.gb_genome (77415/14/1)	gene	translational GTPase TypA
E2E33_004955	E2E33_004955, MBF8417703.1	MA-13_genebank.gb_genome (77415/14/1)	gene	YlaF family protein
E2E33_004960	E2E33_004960, MBF8417704.1	MA-13_genebank.gb_genome (77415/14/1)	gene	inositol monophosphatase
E2E33_004965	E2E33_004965, MBF8417705.1	MA-13_genebank.gb_genome (77415/14/1)	gene	hypothetical protein
E2E33_004970	E2E33_004970, MBF8417706.1	MA-13_genebank.gb_genome (77415/14/1)	gene	DUF1054 domain-containing protein
E2E33_004975	E2E33_004975, MBF8417707.1	MA-13_genebank.gb_genome (77415/14/1)	gene	UPF0223 family protein
E2E33_004985	E2E33_004985, MBF8417709.1	MA-13_genebank.gb_genome (77415/14/1)	gene	aminotransferase class I/II-fold pyridoxal phosphate-dependent enzyme
E2E33_004995	E2E33_004995, MBF8417711.1	MA-13_genebank.gb_genome (77415/14/1)	gene	hypothetical protein
E2E33_005000	1.8.1.4, E2E33_005000, MBF8417712.1, lpdA	MA-13_genebank.gb_genome (77415/14/1)	gene	dihydrolipoyl dehydrogenase
E2E33_005005	E2E33_005005, MBF8417713.1	MA-13_genebank.gb_genome (77415/14/1)	gene	2-oxo acid dehydrogenase subunit E2
E2E33_005010	E2E33_005010, MBF8417714.1	MA-13_genebank.gb_genome (77415/14/1)	gene	alpha-ketoacid dehydrogenase subunit beta
E2E33_005015	E2E33_005015, MBF8417715.1, pdhA	MA-13_genebank.gb_genome (77415/14/1)	gene	pyruvate dehydrogenase (acetyl-transferring) E1 component subunit alpha
E2E33_005020	E2E33_005020, MBF8417716.1	MA-13_genebank.gb_genome (77415/14/1)	gene	DNA-dependent RNA polymerase auxiliary subunit epsilon family protein
E2E33_005025	E2E33_005025, MBF8417717.1	MA-13_genebank.gb_genome (77415/14/1)	gene	ribonuclease J
E2E33_005035	E2E33_005035, MBF8417719.1	MA-13_genebank.gb_genome (77415/14/1)	gene	N-acetyldiaminopimelate deacetylase
E2E33_005040	E2E33_005040, MBF8417720.1, dapD	MA-13_genebank.gb_genome (77415/14/1)	gene	2,3,4,5-tetrahydropyridine-2,6-dicarboxylate N-acetyltransferase
E2E33_005045	E2E33_005045, MBF8417721.1	MA-13_genebank.gb_genome (77415/14/1)	gene	LysR family transcriptional regulator
E2E33_005050	E2E33_005050, MBF8417722.1	MA-13_genebank.gb_genome (77415/14/1)	gene	CBS domain-containing protein
E2E33_005055	E2E33_005055, MBF8417723.1	MA-13_genebank.gb_genome (77415/14/1)	gene	YkuJ family protein
E2E33_005060	E2E33_005060, MBF8417724.1	MA-13_genebank.gb_genome (77415/14/1)	gene	acetamidase/formamidase family protein
E2E33_005065	1.3.1.34, E2E33_005065, MBF8417725.1	MA-13_genebank.gb_genome (77415/14/1)	gene	2,4-dienoyl-CoA reductase
E2E33_005070	E2E33_005070, MBF8417726.1	MA-13_genebank.gb_genome (77415/14/1)	gene	hypothetical protein
E2E33_005080	E2E33_005080, MBF8417727.1	MA-13_genebank.gb_genome (77415/14/1)	gene	MMPL family transporter
E2E33_005085	E2E33_005085, MBF8417728.1	MA-13_genebank.gb_genome (77415/14/1)	gene	hypothetical protein
E2E33_005090	E2E33_005090, MBF8417729.1	MA-13_genebank.gb_genome (77415/14/1)	gene	chemotaxis protein CheV
E2E33_005095	E2E33_005095, MBF8417730.1	MA-13_genebank.gb_genome (77415/14/1)	gene	aminotransferase A
E2E33_005100	E2E33_005100, MBF8417731.1	MA-13_genebank.gb_genome (77415/14/1)	gene	NAD(P)-dependent oxidoreductase
E2E33_005105	E2E33_005105, MBF8417732.1	MA-13_genebank.gb_genome (77415/14/1)	gene	SDR family oxidoreductase
E2E33_005110	2.7.3.9, E2E33_005110, MBF8417733.1, ptsP	MA-13_genebank.gb_genome (77415/14/1)	gene	phosphoenolpyruvate--protein phosphotransferase
E2E33_005115	E2E33_005115, MBF8417734.1	MA-13_genebank.gb_genome (77415/14/1)	gene	phosphocarrier protein HPr
E2E33_005120	E2E33_005120, MBF8417735.1	MA-13_genebank.gb_genome (77415/14/1)	gene	hypothetical protein
E2E33_005125	E2E33_005125, MBF8417736.1	MA-13_genebank.gb_genome (77415/14/1)	gene	DUF2187 family protein
E2E33_005130	E2E33_005130, MBF8417737.1	MA-13_genebank.gb_genome (77415/14/1)	gene	CPBP family intramembrane metalloprotease
E2E33_005135	E2E33_005135, MBF8417738.1	MA-13_genebank.gb_genome (77415/14/1)	gene	hypothetical protein
E2E33_005140	E2E33_005140, MBF8417739.1	MA-13_genebank.gb_genome (77415/14/1)	gene	AAA family ATPase
E2E33_005145	E2E33_005145, MBF8417740.1	MA-13_genebank.gb_genome (77415/14/1)	gene	aspartyl-phosphate phosphatase Spo0E family protein
E2E33_005150	E2E33_005150, MBF8417741.1	MA-13_genebank.gb_genome (77415/14/1)	gene	DUF1232 domain-containing protein
E2E33_005155	2.1.1.63, E2E33_005155, MBF8417742.1	MA-13_genebank.gb_genome (77415/14/1)	gene	methylated-DNA--[protein]-cysteine S-methyltransferase
E2E33_005275	E2E33_005275, MBF8417763.1	MA-13_genebank.gb_genome (77415/14/1)	gene	carboxymuconolactone decarboxylase family protein
E2E33_005285	E2E33_005285, MBF8417765.1	MA-13_genebank.gb_genome (77415/14/1)	gene	DUF3311 domain-containing protein
E2E33_005290	E2E33_005290, MBF8417766.1	MA-13_genebank.gb_genome (77415/14/1)	gene	sodium:solute symporter
E2E33_005335	E2E33_005335, MBF8417772.1	MA-13_genebank.gb_genome (77415/14/1)	gene	YkyA family protein
E2E33_005340	E2E33_005340, MBF8417773.1	MA-13_genebank.gb_genome (77415/14/1)	gene	polysaccharide deacetylase
E2E33_005375	E2E33_005375, MBF8417776.1	MA-13_genebank.gb_genome (77415/14/1)	gene	rhodanese-like domain-containing protein
E2E33_005380	E2E33_005380, MBF8417777.1	MA-13_genebank.gb_genome (77415/14/1)	gene	metal-sensitive transcriptional regulator
E2E33_005385	E2E33_005385, MBF8417778.1	MA-13_genebank.gb_genome (77415/14/1)	gene	thermonuclease family protein
E2E33_005390	E2E33_005390, MBF8417779.1	MA-13_genebank.gb_genome (77415/14/1)	gene	PTS glucose transporter subunit IIA
E2E33_005410	E2E33_005410, MBF8417781.1	MA-13_genebank.gb_genome (77415/14/1)	gene	hypothetical protein
E2E33_005415	E2E33_005415, MBF8417782.1	MA-13_genebank.gb_genome (77415/14/1)	gene	hypothetical protein
E2E33_005420	1.2.1.38, E2E33_005420, MBF8417783.1	MA-13_genebank.gb_genome (77415/14/1)	gene	N-acetyl-gamma-glutamyl-phosphate reductase
E2E33_005425	2.3.1.1, 2.3.1.35, E2E33_005425, MBF8417784.1, argJ	MA-13_genebank.gb_genome (77415/14/1)	gene	bifunctional glutamate N-acetyltransferase/amino-acid acetyltransferase ArgJ
E2E33_005430	2.7.2.8, E2E33_005430, MBF8417785.1, argB	MA-13_genebank.gb_genome (77415/14/1)	gene	acetylglutamate kinase
E2E33_005435	2.6.1.11, E2E33_005435, MBF8417786.1	MA-13_genebank.gb_genome (77415/14/1)	gene	acetylornithine transaminase
E2E33_005445	6.3.5.5, E2E33_005445, MBF8417788.1, carB	MA-13_genebank.gb_genome (77415/14/1)	gene	carbamoyl-phosphate synthase (glutamine-hydrolyzing) large subunit
E2E33_005450	2.1.3.3, E2E33_005450, MBF8417789.1, argF	MA-13_genebank.gb_genome (77415/14/1)	gene	ornithine carbamoyltransferase
E2E33_005455	6.3.4.5, E2E33_005455, MBF8417790.1	MA-13_genebank.gb_genome (77415/14/1)	gene	argininosuccinate synthase
E2E33_005460	4.3.2.1, E2E33_005460, MBF8417791.1, argH	MA-13_genebank.gb_genome (77415/14/1)	gene	argininosuccinate lyase
E2E33_005470	E2E33_005470, MBF8417793.1	MA-13_genebank.gb_genome (77415/14/1)	gene	ferrous iron transport protein A
E2E33_005475	E2E33_005475, MBF8417794.1, feoB	MA-13_genebank.gb_genome (77415/14/1)	gene	ferrous iron transport protein B
E2E33_005480	E2E33_005480, MBF8417795.1	MA-13_genebank.gb_genome (77415/14/1)	gene	FeoB-associated Cys-rich membrane protein
E2E33_005485	3.5.1.88, E2E33_005485, MBF8417796.1	MA-13_genebank.gb_genome (77415/14/1)	gene	peptide deformylase
E2E33_005490	E2E33_005490, MBF8417797.1	MA-13_genebank.gb_genome (77415/14/1)	gene	MerR family transcriptional regulator
E2E33_005495	E2E33_005495, MBF8417798.1	MA-13_genebank.gb_genome (77415/14/1)	gene	C39 family peptidase
E2E33_005500	5.3.1.6, E2E33_005500, MBF8417799.1, rpiA	MA-13_genebank.gb_genome (77415/14/1)	gene	ribose-5-phosphate isomerase RpiA
E2E33_005505	E2E33_005505, MBF8417800.1	MA-13_genebank.gb_genome (77415/14/1)	gene	oligoribonuclease
E2E33_005510	E2E33_005510, MBF8417801.1	MA-13_genebank.gb_genome (77415/14/1)	gene	NAD(P)/FAD-dependent oxidoreductase
E2E33_005515	E2E33_005515, MBF8417802.1	MA-13_genebank.gb_genome (77415/14/1)	gene	DUF1641 domain-containing protein
E2E33_005520	2.7.2.11, E2E33_005520, MBF8417803.1	MA-13_genebank.gb_genome (77415/14/1)	gene	glutamate 5-kinase
E2E33_005525	1.2.1.41, E2E33_005525, MBF8417804.1	MA-13_genebank.gb_genome (77415/14/1)	gene	glutamate-5-semialdehyde dehydrogenase
E2E33_005535	E2E33_005535, MBF8417805.1	MA-13_genebank.gb_genome (77415/14/1)	gene	YfcE family phosphodiesterase
E2E33_005540	2.7.9.3, E2E33_005540, MBF8417806.1, selD	MA-13_genebank.gb_genome (77415/14/1)	gene	selenide, water dikinase SelD
E2E33_005545	E2E33_005545, MBF8417807.1, mnmH	MA-13_genebank.gb_genome (77415/14/1)	gene	tRNA 2-selenouridine(34) synthase MnmH
E2E33_005550	E2E33_005550, MBF8417808.1	MA-13_genebank.gb_genome (77415/14/1)	gene	hypothetical protein
E2E33_005565	1.1.1.44, E2E33_005565, MBF8417810.1, gndA	MA-13_genebank.gb_genome (77415/14/1)	gene	NADP-dependent phosphogluconate dehydrogenase
E2E33_005570	E2E33_005570, MBF8417811.1	MA-13_genebank.gb_genome (77415/14/1)	gene	DUF1450 domain-containing protein
E2E33_005575	E2E33_005575, MBF8417812.1	MA-13_genebank.gb_genome (77415/14/1)	gene	DUF1189 family protein
E2E33_005580	1.3.1.98, E2E33_005580, MBF8417813.1, murB	MA-13_genebank.gb_genome (77415/14/1)	gene	UDP-N-acetylmuramate dehydrogenase
E2E33_005590	E2E33_005590, MBF8417814.1	MA-13_genebank.gb_genome (77415/14/1)	gene	ABC transporter ATP-binding protein
E2E33_005595	E2E33_005595, MBF8417815.1	MA-13_genebank.gb_genome (77415/14/1)	gene	ABC transporter permease subunit
E2E33_005600	E2E33_005600, MBF8417816.1	MA-13_genebank.gb_genome (77415/14/1)	gene	VanZ family protein
E2E33_005610	E2E33_005610, MBF8417818.1	MA-13_genebank.gb_genome (77415/14/1)	gene	Nramp family divalent metal transporter
E2E33_005615	E2E33_005615, MBF8417819.1	MA-13_genebank.gb_genome (77415/14/1)	gene	CoA pyrophosphatase
E2E33_005620	E2E33_005620, MBF8417820.1	MA-13_genebank.gb_genome (77415/14/1)	gene	N-acetyltransferase
E2E33_005625	E2E33_005625, MBF8417821.1	MA-13_genebank.gb_genome (77415/14/1)	gene	DsbA family protein
E2E33_005645	2.7.7.27, E2E33_005645, MBF8417825.1	MA-13_genebank.gb_genome (77415/14/1)	gene	glucose-1-phosphate adenylyltransferase
E2E33_005650	2.7.7.27, E2E33_005650, MBF8417826.1, glgD	MA-13_genebank.gb_genome (77415/14/1)	gene	glucose-1-phosphate adenylyltransferase subunit GlgD
E2E33_005655	2.4.1.21, E2E33_005655, MBF8417827.1, glgA	MA-13_genebank.gb_genome (77415/14/1)	gene	glycogen synthase GlgA
E2E33_005675	E2E33_005675, MBF8417830.1	MA-13_genebank.gb_genome (77415/14/1)	gene	NAD(P)/FAD-dependent oxidoreductase
E2E33_005680	E2E33_005680, MBF8417831.1	MA-13_genebank.gb_genome (77415/14/1)	gene	NAD(P)/FAD-dependent oxidoreductase
E2E33_005700	E2E33_005700, MBF8417834.1, smpB	MA-13_genebank.gb_genome (77415/14/1)	gene	SsrA-binding protein SmpB
E2E33_005710	E2E33_005710, MBF8417836.1	MA-13_genebank.gb_genome (77415/14/1)	gene	carboxylesterase
E2E33_005715	E2E33_005715, MBF8417837.1, secG	MA-13_genebank.gb_genome (77415/14/1)	gene	preprotein translocase subunit SecG
E2E33_005720	4.2.1.11, E2E33_005720, MBF8417838.1, eno	MA-13_genebank.gb_genome (77415/14/1)	gene	phosphopyruvate hydratase
E2E33_005725	5.4.2.12, E2E33_005725, MBF8417839.1	MA-13_genebank.gb_genome (77415/14/1)	gene	2,3-bisphosphoglycerate-independent phosphoglycerate mutase
E2E33_005730	5.3.1.1, E2E33_005730, MBF8417840.1	MA-13_genebank.gb_genome (77415/14/1)	gene	triose-phosphate isomerase
E2E33_005735	E2E33_005735, MBF8417841.1	MA-13_genebank.gb_genome (77415/14/1)	gene	phosphoglycerate kinase
E2E33_005740	E2E33_005740, MBF8417842.1, gap	MA-13_genebank.gb_genome (77415/14/1)	gene	type I glyceraldehyde-3-phosphate dehydrogenase
E2E33_005745	E2E33_005745, MBF8417843.1	MA-13_genebank.gb_genome (77415/14/1)	gene	sugar-binding transcriptional regulator
E2E33_005750	E2E33_005750, MBF8417844.1	MA-13_genebank.gb_genome (77415/14/1)	gene	glutaredoxin family protein
E2E33_005755	E2E33_005755, MBF8417845.1, rpoN	MA-13_genebank.gb_genome (77415/14/1)	gene	RNA polymerase factor sigma-54
E2E33_005770	E2E33_005770, MBF8417848.1, fdhF	MA-13_genebank.gb_genome (77415/14/1)	gene	formate dehydrogenase subunit alpha
E2E33_005785	E2E33_005785, MBF8417851.1	MA-13_genebank.gb_genome (77415/14/1)	gene	PBP1A family penicillin-binding protein
E2E33_005790	E2E33_005790, MBF8417852.1	MA-13_genebank.gb_genome (77415/14/1)	gene	universal stress protein
E2E33_005800	E2E33_005800, MBF8417854.1	MA-13_genebank.gb_genome (77415/14/1)	gene	ATP-binding cassette domain-containing protein
E2E33_005805	E2E33_005805, MBF8417855.1	MA-13_genebank.gb_genome (77415/14/1)	gene	C40 family peptidase
E2E33_005810	E2E33_005810, MBF8417856.1	MA-13_genebank.gb_genome (77415/14/1)	gene	peptide ABC transporter substrate-binding protein
E2E33_005815	E2E33_005815, MBF8417857.1	MA-13_genebank.gb_genome (77415/14/1)	gene	ABC transporter ATP-binding protein
E2E33_005820	E2E33_005820, MBF8417858.1	MA-13_genebank.gb_genome (77415/14/1)	gene	ABC transporter permease
E2E33_005825	E2E33_005825, MBF8417859.1	MA-13_genebank.gb_genome (77415/14/1)	gene	ABC transporter permease
E2E33_005830	E2E33_005830, MBF8417860.1	MA-13_genebank.gb_genome (77415/14/1)	gene	gamma-glutamyl-gamma-aminobutyrate hydrolase family protein
E2E33_005835	E2E33_005835, MBF8417861.1, corA	MA-13_genebank.gb_genome (77415/14/1)	gene	magnesium/cobalt transporter CorA
E2E33_005840	E2E33_005840, MBF8417862.1	MA-13_genebank.gb_genome (77415/14/1)	gene	YhdB family protein
E2E33_005850	E2E33_005850, MBF8417864.1	MA-13_genebank.gb_genome (77415/14/1)	gene	SpoVR family protein
E2E33_005855	E2E33_005855, MBF8417865.1	MA-13_genebank.gb_genome (77415/14/1)	gene	acyltransferase family protein
E2E33_005860	E2E33_005860, MBF8417866.1	MA-13_genebank.gb_genome (77415/14/1)	gene	SGNH/GDSL hydrolase family protein
E2E33_005865	E2E33_005865, MBF8417867.1	MA-13_genebank.gb_genome (77415/14/1)	gene	disulfide bond formation protein B
E2E33_005870	E2E33_005870, MBF8417868.1	MA-13_genebank.gb_genome (77415/14/1)	gene	thioredoxin family protein
E2E33_005880	E2E33_005880, MBF8417869.1	MA-13_genebank.gb_genome (77415/14/1)	gene	DUF47 domain-containing protein
E2E33_005885	E2E33_005885, MBF8417870.1	MA-13_genebank.gb_genome (77415/14/1)	gene	inorganic phosphate transporter
E2E33_005890	E2E33_005890, MBF8417871.1	MA-13_genebank.gb_genome (77415/14/1)	gene	GNAT family N-acetyltransferase
E2E33_005895	E2E33_005895, MBF8417872.1	MA-13_genebank.gb_genome (77415/14/1)	gene	hypothetical protein
E2E33_005900	E2E33_005900, MBF8417873.1, yhbH	MA-13_genebank.gb_genome (77415/14/1)	gene	sporulation protein YhbH
E2E33_005905	E2E33_005905, MBF8417874.1	MA-13_genebank.gb_genome (77415/14/1)	gene	PrkA family serine protein kinase
E2E33_005915	2.1.1.207, E2E33_005915, MBF8417876.1, trmL	MA-13_genebank.gb_genome (77415/14/1)	gene	tRNA (uridine(34)/cytosine(34)/5- carboxymethylaminomethyluridine(34)-2'-O)- methyltransferase TrmL
E2E33_005920	E2E33_005920, MBF8417877.1	MA-13_genebank.gb_genome (77415/14/1)	gene	amidase domain-containing protein
E2E33_005930	E2E33_005930, MBF8417879.1	MA-13_genebank.gb_genome (77415/14/1)	gene	MarC family protein
E2E33_005935	3.6.1.1, E2E33_005935, MBF8417880.1	MA-13_genebank.gb_genome (77415/14/1)	gene	manganese-dependent inorganic pyrophosphatase
E2E33_005940	E2E33_005940, MBF8417881.1	MA-13_genebank.gb_genome (77415/14/1)	gene	ferritin-like domain-containing protein
E2E33_005945	E2E33_005945, MBF8417882.1	MA-13_genebank.gb_genome (77415/14/1)	gene	amino acid ABC transporter substrate-binding protein
E2E33_005950	E2E33_005950, MBF8417883.1	MA-13_genebank.gb_genome (77415/14/1)	gene	amino acid ABC transporter permease
E2E33_005960	E2E33_005960, MBF8417884.1	MA-13_genebank.gb_genome (77415/14/1)	gene	formate/nitrite transporter family protein
E2E33_005970	2.3.1.54, E2E33_005970, MBF8417886.1, pflB	MA-13_genebank.gb_genome (77415/14/1)	gene	formate C-acetyltransferase
E2E33_005975	1.97.1.4, E2E33_005975, MBF8417887.1, pflA	MA-13_genebank.gb_genome (77415/14/1)	gene	pyruvate formate lyase-activating protein
E2E33_005980	E2E33_005980, MBF8417888.1	MA-13_genebank.gb_genome (77415/14/1)	gene	NAD(P)H-dependent oxidoreductase
E2E33_005985	E2E33_005985, MBF8417889.1	MA-13_genebank.gb_genome (77415/14/1)	gene	hypothetical protein
E2E33_005990	E2E33_005990, MBF8417890.1	MA-13_genebank.gb_genome (77415/14/1)	gene	ABC transporter permease
E2E33_006000	E2E33_006000, MBF8417892.1	MA-13_genebank.gb_genome (77415/14/1)	gene	GDSL family lipase
E2E33_006010	E2E33_006010, MBF8417893.1	MA-13_genebank.gb_genome (77415/14/1)	gene	aspartyl-phosphate phosphatase Spo0E family protein
E2E33_006015	E2E33_006015, MBF8417894.1, sigW	MA-13_genebank.gb_genome (77415/14/1)	gene	RNA polymerase sigma factor SigW
E2E33_006020	E2E33_006020, MBF8417895.1	MA-13_genebank.gb_genome (77415/14/1)	gene	anti-sigma factor
E2E33_006025	E2E33_006025, MBF8417896.1	MA-13_genebank.gb_genome (77415/14/1)	gene	TIGR00159 family protein
E2E33_006030	E2E33_006030, MBF8417897.1	MA-13_genebank.gb_genome (77415/14/1)	gene	hypothetical protein
E2E33_006035	5.4.2.10, E2E33_006035, MBF8417898.1	MA-13_genebank.gb_genome (77415/14/1)	gene	phosphoglucosamine mutase
E2E33_006040	2.6.1.16, E2E33_006040, MBF8417899.1, glmS	MA-13_genebank.gb_genome (77415/14/1)	gene	glutamine--fructose-6-phosphate transaminase (isomerizing)
E2E33_006055	E2E33_006055, MBF8417902.1	MA-13_genebank.gb_genome (77415/14/1)	gene	phosphatidylglycerophosphatase A
E2E33_006060	E2E33_006060, MBF8417903.1, yutH	MA-13_genebank.gb_genome (77415/14/1)	gene	spore coat protein YutH
E2E33_006065	E2E33_006065, MBF8417904.1	MA-13_genebank.gb_genome (77415/14/1)	gene	NifU family protein
E2E33_006070	E2E33_006070, MBF8417905.1	MA-13_genebank.gb_genome (77415/14/1)	gene	YuzD family protein
E2E33_006075	E2E33_006075, MBF8417906.1	MA-13_genebank.gb_genome (77415/14/1)	gene	iron-sulfur cluster assembly accessory protein
E2E33_006105	E2E33_006105, MBF8417911.1	MA-13_genebank.gb_genome (77415/14/1)	gene	8-oxo-dGTP diphosphatase
E2E33_006110	E2E33_006110, MBF8417912.1, rapZ	MA-13_genebank.gb_genome (77415/14/1)	gene	RNase adapter RapZ
E2E33_006115	E2E33_006115, MBF8417913.1	MA-13_genebank.gb_genome (77415/14/1)	gene	YvcK family protein
E2E33_006120	E2E33_006120, MBF8417914.1, whiA	MA-13_genebank.gb_genome (77415/14/1)	gene	DNA-binding protein WhiA
E2E33_006125	E2E33_006125, MBF8417915.1	MA-13_genebank.gb_genome (77415/14/1)	gene	HPr family phosphocarrier protein
E2E33_006130	3.4.21.92, E2E33_006130, MBF8417916.1, clpP	MA-13_genebank.gb_genome (77415/14/1)	gene	ATP-dependent Clp endopeptidase proteolytic subunit ClpP
E2E33_006145	E2E33_006145, MBF8417918.1	MA-13_genebank.gb_genome (77415/14/1)	gene	aspartyl-phosphate phosphatase Spo0E family protein
E2E33_006150	2.5.1.75, E2E33_006150, MBF8417919.1, miaA	MA-13_genebank.gb_genome (77415/14/1)	gene	tRNA (adenosine(37)-N6)-dimethylallyltransferase MiaA
E2E33_006155	E2E33_006155, MBF8417920.1, hfq	MA-13_genebank.gb_genome (77415/14/1)	gene	RNA chaperone Hfq
E2E33_006160	E2E33_006160, MBF8417921.1, spoVK	MA-13_genebank.gb_genome (77415/14/1)	gene	stage V sporulation protein K
E2E33_006170	E2E33_006170, MBF8417923.1	MA-13_genebank.gb_genome (77415/14/1)	gene	methionine gamma-lyase family protein
E2E33_006175	E2E33_006175, MBF8417924.1	MA-13_genebank.gb_genome (77415/14/1)	gene	5'-3' exonuclease
E2E33_006185	E2E33_006185, MBF8417926.1	MA-13_genebank.gb_genome (77415/14/1)	gene	zinc-finger domain-containing protein
E2E33_006190	E2E33_006190, MBF8417927.1	MA-13_genebank.gb_genome (77415/14/1)	gene	cold-shock protein
E2E33_006195	E2E33_006195, MBF8417928.1, mntR	MA-13_genebank.gb_genome (77415/14/1)	gene	transcriptional regulator MntR
E2E33_006200	6.3.4.3, E2E33_006200, MBF8417929.1	MA-13_genebank.gb_genome (77415/14/1)	gene	formate--tetrahydrofolate ligase
E2E33_006205	E2E33_006205, MBF8417930.1	MA-13_genebank.gb_genome (77415/14/1)	gene	hypothetical protein
E2E33_006210	E2E33_006210, MBF8417931.1	MA-13_genebank.gb_genome (77415/14/1)	gene	ABC-F family ATP-binding cassette domain-containing protein
E2E33_006220	E2E33_006220, MBF8417932.1, cydC	MA-13_genebank.gb_genome (77415/14/1)	gene	thiol reductant ABC exporter subunit CydC
E2E33_006225	E2E33_006225, MBF8417933.1, cydD	MA-13_genebank.gb_genome (77415/14/1)	gene	thiol reductant ABC exporter subunit CydD
E2E33_006230	E2E33_006230, MBF8417934.1, cydB	MA-13_genebank.gb_genome (77415/14/1)	gene	cytochrome d ubiquinol oxidase subunit II
E2E33_006240	E2E33_006240, MBF8417936.1	MA-13_genebank.gb_genome (77415/14/1)	gene	hypothetical protein
E2E33_006245	E2E33_006245, MBF8417937.1	MA-13_genebank.gb_genome (77415/14/1)	gene	polysaccharide deacetylase family protein
E2E33_006260	E2E33_006260, MBF8417940.1	MA-13_genebank.gb_genome (77415/14/1)	gene	KinB-signaling pathway activation protein
E2E33_006265	E2E33_006265, MBF8417941.1	MA-13_genebank.gb_genome (77415/14/1)	gene	spore gernimation protein GerD
E2E33_006270	E2E33_006270, MBF8417942.1	MA-13_genebank.gb_genome (77415/14/1)	gene	Mrp/NBP35 family ATP-binding protein
E2E33_006275	3.5.1.28, E2E33_006275, MBF8417943.1, cwlD	MA-13_genebank.gb_genome (77415/14/1)	gene	N-acetylmuramoyl-L-alanine amidase CwlD
E2E33_006280	E2E33_006280, MBF8417944.1	MA-13_genebank.gb_genome (77415/14/1)	gene	YbaK family protein
E2E33_006285	E2E33_006285, MBF8417945.1	MA-13_genebank.gb_genome (77415/14/1)	gene	amino acid permease
E2E33_006290	2.7.1.25, E2E33_006290, MBF8417946.1, cysC	MA-13_genebank.gb_genome (77415/14/1)	gene	adenylyl-sulfate kinase
E2E33_006295	2.7.7.4, E2E33_006295, MBF8417947.1, sat	MA-13_genebank.gb_genome (77415/14/1)	gene	sulfate adenylyltransferase
E2E33_006305	E2E33_006305, MBF8417949.1, rpsI	MA-13_genebank.gb_genome (77415/14/1)	gene	30S ribosomal protein S9
E2E33_006310	E2E33_006310, MBF8417950.1, rplM	MA-13_genebank.gb_genome (77415/14/1)	gene	50S ribosomal protein L13
E2E33_006315	5.4.99.12, E2E33_006315, MBF8417951.1, truA	MA-13_genebank.gb_genome (77415/14/1)	gene	tRNA pseudouridine(38-40) synthase TruA
E2E33_006320	E2E33_006320, MBF8417952.1	MA-13_genebank.gb_genome (77415/14/1)	gene	energy-coupling factor transporter transmembrane protein EcfT
E2E33_006325	E2E33_006325, MBF8417953.1	MA-13_genebank.gb_genome (77415/14/1)	gene	energy-coupling factor ABC transporter ATP-binding protein
E2E33_006330	E2E33_006330, MBF8417954.1	MA-13_genebank.gb_genome (77415/14/1)	gene	energy-coupling factor ABC transporter ATP-binding protein
E2E33_006335	E2E33_006335, MBF8417955.1, rplQ	MA-13_genebank.gb_genome (77415/14/1)	gene	50S ribosomal protein L17
E2E33_006340	2.7.7.6, E2E33_006340, MBF8417956.1	MA-13_genebank.gb_genome (77415/14/1)	gene	DNA-directed RNA polymerase subunit alpha
E2E33_006345	E2E33_006345, MBF8417957.1, rpsK	MA-13_genebank.gb_genome (77415/14/1)	gene	30S ribosomal protein S11
E2E33_006350	E2E33_006350, MBF8417958.1, rpsM	MA-13_genebank.gb_genome (77415/14/1)	gene	30S ribosomal protein S13
E2E33_006360	E2E33_006360, MBF8417960.1, infA	MA-13_genebank.gb_genome (77415/14/1)	gene	translation initiation factor IF-1
E2E33_006365	2.7.4.3, E2E33_006365, MBF8417961.1	MA-13_genebank.gb_genome (77415/14/1)	gene	adenylate kinase
E2E33_006370	E2E33_006370, MBF8417962.1, secY	MA-13_genebank.gb_genome (77415/14/1)	gene	preprotein translocase subunit SecY
E2E33_006375	E2E33_006375, MBF8417963.1, rplO	MA-13_genebank.gb_genome (77415/14/1)	gene	50S ribosomal protein L15
E2E33_006380	E2E33_006380, MBF8417964.1, rpmD	MA-13_genebank.gb_genome (77415/14/1)	gene	50S ribosomal protein L30
E2E33_006385	E2E33_006385, MBF8417965.1, rpsE	MA-13_genebank.gb_genome (77415/14/1)	gene	30S ribosomal protein S5
E2E33_006390	E2E33_006390, MBF8417966.1, rplR	MA-13_genebank.gb_genome (77415/14/1)	gene	50S ribosomal protein L18
E2E33_006395	E2E33_006395, MBF8417967.1, rplF	MA-13_genebank.gb_genome (77415/14/1)	gene	50S ribosomal protein L6
E2E33_006400	E2E33_006400, MBF8417968.1, rpsH	MA-13_genebank.gb_genome (77415/14/1)	gene	30S ribosomal protein S8
E2E33_006405	E2E33_006405, MBF8417969.1	MA-13_genebank.gb_genome (77415/14/1)	gene	type Z 30S ribosomal protein S14
E2E33_006410	E2E33_006410, MBF8417970.1, rplE	MA-13_genebank.gb_genome (77415/14/1)	gene	50S ribosomal protein L5
E2E33_006415	E2E33_006415, MBF8417971.1, rplX	MA-13_genebank.gb_genome (77415/14/1)	gene	50S ribosomal protein L24
E2E33_006420	E2E33_006420, MBF8417972.1, rplN	MA-13_genebank.gb_genome (77415/14/1)	gene	50S ribosomal protein L14
E2E33_006425	E2E33_006425, MBF8417973.1, rpsQ	MA-13_genebank.gb_genome (77415/14/1)	gene	30S ribosomal protein S17
E2E33_006430	E2E33_006430, MBF8417974.1, rpmC	MA-13_genebank.gb_genome (77415/14/1)	gene	50S ribosomal protein L29
E2E33_006435	E2E33_006435, MBF8417975.1, rplP	MA-13_genebank.gb_genome (77415/14/1)	gene	50S ribosomal protein L16
E2E33_006440	E2E33_006440, MBF8417976.1, rpsC	MA-13_genebank.gb_genome (77415/14/1)	gene	30S ribosomal protein S3
E2E33_006445	E2E33_006445, MBF8417977.1, rplV	MA-13_genebank.gb_genome (77415/14/1)	gene	50S ribosomal protein L22
E2E33_006450	E2E33_006450, MBF8417978.1, rpsS	MA-13_genebank.gb_genome (77415/14/1)	gene	30S ribosomal protein S19
E2E33_006455	E2E33_006455, MBF8417979.1, rplB	MA-13_genebank.gb_genome (77415/14/1)	gene	50S ribosomal protein L2
E2E33_006460	E2E33_006460, MBF8417980.1, rplW	MA-13_genebank.gb_genome (77415/14/1)	gene	50S ribosomal protein L23
E2E33_006465	E2E33_006465, MBF8417981.1, rplD	MA-13_genebank.gb_genome (77415/14/1)	gene	50S ribosomal protein L4
E2E33_006470	E2E33_006470, MBF8417982.1, rplC	MA-13_genebank.gb_genome (77415/14/1)	gene	50S ribosomal protein L3
E2E33_006475	E2E33_006475, MBF8417983.1, rpsJ	MA-13_genebank.gb_genome (77415/14/1)	gene	30S ribosomal protein S10
E2E33_006480	E2E33_006480, MBF8417984.1, tuf	MA-13_genebank.gb_genome (77415/14/1)	gene	elongation factor Tu
E2E33_006485	E2E33_006485, MBF8417985.1, fusA	MA-13_genebank.gb_genome (77415/14/1)	gene	elongation factor G
E2E33_006490	E2E33_006490, MBF8417986.1, rpsG	MA-13_genebank.gb_genome (77415/14/1)	gene	30S ribosomal protein S7
E2E33_006495	E2E33_006495, MBF8417987.1, rpsL	MA-13_genebank.gb_genome (77415/14/1)	gene	30S ribosomal protein S12
E2E33_006500	E2E33_006500, MBF8417988.1	MA-13_genebank.gb_genome (77415/14/1)	gene	50S ribosomal protein L7ae-like protein
E2E33_006505	2.7.7.6, E2E33_006505, MBF8417989.1, rpoC	MA-13_genebank.gb_genome (77415/14/1)	gene	DNA-directed RNA polymerase subunit beta'
E2E33_006510	2.7.7.6, E2E33_006510, MBF8417990.1, rpoB	MA-13_genebank.gb_genome (77415/14/1)	gene	DNA-directed RNA polymerase subunit beta
E2E33_006515	E2E33_006515, MBF8417991.1	MA-13_genebank.gb_genome (77415/14/1)	gene	class I SAM-dependent methyltransferase
E2E33_006520	E2E33_006520, MBF8417992.1, rplL	MA-13_genebank.gb_genome (77415/14/1)	gene	50S ribosomal protein L7/L12
E2E33_006525	E2E33_006525, MBF8417993.1	MA-13_genebank.gb_genome (77415/14/1)	gene	50S ribosomal protein L10
E2E33_006530	E2E33_006530, MBF8417994.1, rplA	MA-13_genebank.gb_genome (77415/14/1)	gene	50S ribosomal protein L1
E2E33_006535	E2E33_006535, MBF8417995.1, rplK	MA-13_genebank.gb_genome (77415/14/1)	gene	50S ribosomal protein L11
E2E33_006540	E2E33_006540, MBF8417996.1, nusG	MA-13_genebank.gb_genome (77415/14/1)	gene	transcription termination/antitermination protein NusG
E2E33_006545	E2E33_006545, MBF8417997.1, secE	MA-13_genebank.gb_genome (77415/14/1)	gene	preprotein translocase subunit SecE
E2E33_006555	E2E33_006555, MBF8417999.1, sigH	MA-13_genebank.gb_genome (77415/14/1)	gene	RNA polymerase sporulation sigma factor SigH
E2E33_006565	E2E33_006565, MBF8418001.1, rlmB	MA-13_genebank.gb_genome (77415/14/1)	gene	23S rRNA (guanosine(2251)-2'-O)-methyltransferase RlmB
E2E33_006570	E2E33_006570, MBF8418002.1	MA-13_genebank.gb_genome (77415/14/1)	gene	Mini-ribonuclease 3
E2E33_006575	6.1.1.16, E2E33_006575, MBF8418003.1, cysS	MA-13_genebank.gb_genome (77415/14/1)	gene	cysteine--tRNA ligase
E2E33_006580	2.3.1.30, E2E33_006580, MBF8418004.1, cysE	MA-13_genebank.gb_genome (77415/14/1)	gene	serine O-acetyltransferase
E2E33_006585	6.1.1.17, E2E33_006585, MBF8418005.1	MA-13_genebank.gb_genome (77415/14/1)	gene	glutamate--tRNA ligase
E2E33_006590	4.6.1.12, E2E33_006590, MBF8418006.1	MA-13_genebank.gb_genome (77415/14/1)	gene	2-C-methyl-D-erythritol 2,4-cyclodiphosphate synthase
E2E33_006595	2.7.7.60, E2E33_006595, MBF8418007.1, ispD	MA-13_genebank.gb_genome (77415/14/1)	gene	2-C-methyl-D-erythritol 4-phosphate cytidylyltransferase
E2E33_006600	E2E33_006600, MBF8418008.1	MA-13_genebank.gb_genome (77415/14/1)	gene	PIN/TRAM domain-containing protein
E2E33_006605	E2E33_006605, MBF8418009.1, radA	MA-13_genebank.gb_genome (77415/14/1)	gene	DNA repair protein RadA
E2E33_006610	E2E33_006610, MBF8418010.1	MA-13_genebank.gb_genome (77415/14/1)	gene	ATP-dependent Clp protease ATP-binding subunit
E2E33_006615	2.7.14.1, E2E33_006615, MBF8418011.1	MA-13_genebank.gb_genome (77415/14/1)	gene	protein arginine kinase
E2E33_006620	E2E33_006620, MBF8418012.1	MA-13_genebank.gb_genome (77415/14/1)	gene	UvrB/UvrC motif-containing protein
E2E33_006625	E2E33_006625, MBF8418013.1	MA-13_genebank.gb_genome (77415/14/1)	gene	CtsR family transcriptional regulator
E2E33_006660	E2E33_006660, MBF8418018.1	MA-13_genebank.gb_genome (77415/14/1)	gene	AAA family ATPase
E2E33_006665	E2E33_006665, MBF8418019.1	MA-13_genebank.gb_genome (77415/14/1)	gene	DNA repair exonuclease
E2E33_006675	E2E33_006675, MBF8418021.1	MA-13_genebank.gb_genome (77415/14/1)	gene	NAD(P)H-dependent oxidoreductase
E2E33_006685	E2E33_006685, MBF8418023.1	MA-13_genebank.gb_genome (77415/14/1)	gene	alpha/beta hydrolase
E2E33_006695	E2E33_006695, MBF8418024.1	MA-13_genebank.gb_genome (77415/14/1)	gene	alpha/beta fold hydrolase
E2E33_006700	E2E33_006700, MBF8418025.1, fbpA	MA-13_genebank.gb_genome (77415/14/1)	gene	Fur-regulated basic protein FbpA
E2E33_006725	E2E33_006725, MBF8418030.1, yfkAB	MA-13_genebank.gb_genome (77415/14/1)	gene	radical SAM/CxCxxxxC motif protein YfkAB
E2E33_006735	E2E33_006735, MBF8418032.1	MA-13_genebank.gb_genome (77415/14/1)	gene	hypothetical protein
E2E33_006740	E2E33_006740, MBF8418033.1	MA-13_genebank.gb_genome (77415/14/1)	gene	universal stress protein
E2E33_006750	E2E33_006750, MBF8418035.1	MA-13_genebank.gb_genome (77415/14/1)	gene	AAC(3) family N-acetyltransferase
E2E33_006755	E2E33_006755, MBF8418036.1	MA-13_genebank.gb_genome (77415/14/1)	gene	SDR family oxidoreductase
E2E33_006760	E2E33_006760, MBF8418037.1	MA-13_genebank.gb_genome (77415/14/1)	gene	biotin transporter BioY
E2E33_006765	3.4.11.18, E2E33_006765, MBF8418038.1, map	MA-13_genebank.gb_genome (77415/14/1)	gene	type I methionyl aminopeptidase
E2E33_006770	E2E33_006770, MBF8418039.1	MA-13_genebank.gb_genome (77415/14/1)	gene	C40 family peptidase
E2E33_006775	E2E33_006775, MBF8418040.1	MA-13_genebank.gb_genome (77415/14/1)	gene	hypothetical protein
E2E33_006780	E2E33_006780, MBF8418041.1	MA-13_genebank.gb_genome (77415/14/1)	gene	DEAD/DEAH box helicase
E2E33_006785	1.1.1.1, 1.2.1.10, E2E33_006785, MBF8418042.1, adhC, adhE	MA-13_genebank.gb_genome (77415/14/1)	gene	bifunctional acetaldehyde-CoA/alcohol dehydrogenase
E2E33_006790	E2E33_006790, MBF8418043.1	MA-13_genebank.gb_genome (77415/14/1)	gene	magnesium transporter CorA family protein
E2E33_006800	E2E33_006800, MBF8418044.1, panF	MA-13_genebank.gb_genome (77415/14/1)	gene	sodium/panthothenate symporter
E2E33_006805	E2E33_006805, MBF8418045.1	MA-13_genebank.gb_genome (77415/14/1)	gene	YhdT family protein
E2E33_006810	2.7.7.9, E2E33_006810, MBF8418046.1, galU	MA-13_genebank.gb_genome (77415/14/1)	gene	UTP--glucose-1-phosphate uridylyltransferase GalU
E2E33_006815	E2E33_006815, MBF8418047.1	MA-13_genebank.gb_genome (77415/14/1)	gene	NAD(P)H-hydrate dehydratase
E2E33_006820	E2E33_006820, MBF8418048.1	MA-13_genebank.gb_genome (77415/14/1)	gene	DUF4064 domain-containing protein
E2E33_006825	E2E33_006825, MBF8418049.1	MA-13_genebank.gb_genome (77415/14/1)	gene	arginase family protein
E2E33_006830	E2E33_006830, MBF8418050.1	MA-13_genebank.gb_genome (77415/14/1)	gene	homoserine dehydrogenase
E2E33_006835	4.2.3.1, E2E33_006835, MBF8418051.1	MA-13_genebank.gb_genome (77415/14/1)	gene	threonine synthase
E2E33_006840	2.7.1.39, E2E33_006840, MBF8418052.1	MA-13_genebank.gb_genome (77415/14/1)	gene	homoserine kinase
E2E33_006845	E2E33_006845, MBF8418053.1	MA-13_genebank.gb_genome (77415/14/1)	gene	ABC transporter ATP-binding protein
E2E33_006850	E2E33_006850, MBF8418054.1	MA-13_genebank.gb_genome (77415/14/1)	gene	ABC transporter substrate-binding protein
E2E33_006855	E2E33_006855, MBF8418055.1	MA-13_genebank.gb_genome (77415/14/1)	gene	ABC transporter permease
E2E33_006860	E2E33_006860, MBF8418056.1	MA-13_genebank.gb_genome (77415/14/1)	gene	MTH1187 family thiamine-binding protein
E2E33_006870	E2E33_006870, MBF8418058.1	MA-13_genebank.gb_genome (77415/14/1)	gene	general stress protein
E2E33_006875	4.1.3.30, E2E33_006875, MBF8418059.1, prpB	MA-13_genebank.gb_genome (77415/14/1)	gene	methylisocitrate lyase
E2E33_006915	E2E33_006915, MBF8418065.1	MA-13_genebank.gb_genome (77415/14/1)	gene	SDR family oxidoreductase
E2E33_006920	E2E33_006920, MBF8418066.1	MA-13_genebank.gb_genome (77415/14/1)	gene	divergent PAP2 family protein
E2E33_006955	E2E33_006955, MBF8418071.1	MA-13_genebank.gb_genome (77415/14/1)	gene	NAD-binding protein
E2E33_006960	5.3.1.9, E2E33_006960, MBF8418072.1	MA-13_genebank.gb_genome (77415/14/1)	gene	glucose-6-phosphate isomerase
E2E33_006965	E2E33_006965, MBF8418073.1	MA-13_genebank.gb_genome (77415/14/1)	gene	DUF378 domain-containing protein
E2E33_006970	E2E33_006970, MBF8418074.1	MA-13_genebank.gb_genome (77415/14/1)	gene	GyrI-like domain-containing protein
E2E33_006975	E2E33_006975, MBF8418075.1, yugI	MA-13_genebank.gb_genome (77415/14/1)	gene	general stress protein 13
E2E33_006985	E2E33_006985, MBF8418077.1	MA-13_genebank.gb_genome (77415/14/1)	gene	NADH:flavin oxidoreductase/NADH oxidase
E2E33_006990	E2E33_006990, MBF8418078.1	MA-13_genebank.gb_genome (77415/14/1)	gene	aldo/keto reductase
E2E33_006995	E2E33_006995, MBF8418079.1	MA-13_genebank.gb_genome (77415/14/1)	gene	aldo/keto reductase
E2E33_007000	E2E33_007000, MBF8418080.1	MA-13_genebank.gb_genome (77415/14/1)	gene	L,D-transpeptidase/peptidoglycan binding protein
E2E33_007005	E2E33_007005, MBF8418081.1	MA-13_genebank.gb_genome (77415/14/1)	gene	hypothetical protein
E2E33_007010	E2E33_007010, MBF8418082.1	MA-13_genebank.gb_genome (77415/14/1)	gene	peptidylprolyl isomerase
E2E33_007035	E2E33_007035, MBF8418086.1	MA-13_genebank.gb_genome (77415/14/1)	gene	MFS transporter
E2E33_007040	E2E33_007040, MBF8418087.1	MA-13_genebank.gb_genome (77415/14/1)	gene	hotdog fold thioesterase
E2E33_007045	E2E33_007045, MBF8418088.1	MA-13_genebank.gb_genome (77415/14/1)	gene	hypothetical protein
E2E33_007055	E2E33_007055, MBF8418090.1	MA-13_genebank.gb_genome (77415/14/1)	gene	GerAB/ArcD/ProY family transporter
E2E33_007060	E2E33_007060, MBF8418091.1	MA-13_genebank.gb_genome (77415/14/1)	gene	Ger(x)C family spore germination protein
E2E33_007065	E2E33_007065, MBF8418092.1	MA-13_genebank.gb_genome (77415/14/1)	gene	spore germination protein
E2E33_007070	E2E33_007070, MBF8418093.1	MA-13_genebank.gb_genome (77415/14/1)	gene	hypothetical protein
E2E33_007075	E2E33_007075, MBF8418094.1	MA-13_genebank.gb_genome (77415/14/1)	gene	peptidase M17
E2E33_007085	E2E33_007085	MA-13_genebank.gb_genome (77415/14/1)	gene	YuiB family protein
E2E33_007105	E2E33_007105, MBF8418098.1	MA-13_genebank.gb_genome (77415/14/1)	gene	IS5 family transposase
E2E33_007155	E2E33_007155, MBF8418104.1	MA-13_genebank.gb_genome (77415/14/1)	gene	pectate lyase
E2E33_007160	E2E33_007160, MBF8418105.1	MA-13_genebank.gb_genome (77415/14/1)	gene	NAD-dependent succinate-semialdehyde dehydrogenase
E2E33_007180	E2E33_007180, MBF8418108.1	MA-13_genebank.gb_genome (77415/14/1)	gene	long-chain fatty acid--CoA ligase
E2E33_007195	E2E33_007195, MBF8418111.1	MA-13_genebank.gb_genome (77415/14/1)	gene	STAS domain-containing protein
E2E33_007200	E2E33_007200, MBF8418112.1	MA-13_genebank.gb_genome (77415/14/1)	gene	YebC/PmpR family DNA-binding transcriptional regulator
E2E33_007205	E2E33_007205, MBF8418113.1	MA-13_genebank.gb_genome (77415/14/1)	gene	hypothetical protein
E2E33_007210	E2E33_007210, MBF8418114.1	MA-13_genebank.gb_genome (77415/14/1)	gene	membrane-spanning protein
E2E33_007215	E2E33_007215, MBF8418115.1	MA-13_genebank.gb_genome (77415/14/1)	gene	NAD(P)/FAD-dependent oxidoreductase
E2E33_007220	E2E33_007220, MBF8418116.1	MA-13_genebank.gb_genome (77415/14/1)	gene	ABC transporter ATP-binding protein
E2E33_007225	E2E33_007225, MBF8418117.1	MA-13_genebank.gb_genome (77415/14/1)	gene	ABC transporter substrate-binding protein
E2E33_007230	E2E33_007230, MBF8418118.1	MA-13_genebank.gb_genome (77415/14/1)	gene	iron ABC transporter permease
E2E33_007235	E2E33_007235, MBF8418119.1	MA-13_genebank.gb_genome (77415/14/1)	gene	iron ABC transporter permease
E2E33_007240	E2E33_007240, MBF8418120.1	MA-13_genebank.gb_genome (77415/14/1)	gene	TSUP family transporter
E2E33_007245	E2E33_007245, MBF8418121.1	MA-13_genebank.gb_genome (77415/14/1)	gene	multidrug efflux SMR transporter
E2E33_007250	E2E33_007250, MBF8418122.1	MA-13_genebank.gb_genome (77415/14/1)	gene	multidrug efflux SMR transporter
E2E33_007280	E2E33_007280, MBF8418128.1	MA-13_genebank.gb_genome (77415/14/1)	gene	DUF1646 family protein
E2E33_007290	6.3.5.4, E2E33_007290, MBF8418130.1, asnB	MA-13_genebank.gb_genome (77415/14/1)	gene	asparagine synthase (glutamine-hydrolyzing)
E2E33_007295	E2E33_007295, MBF8418131.1	MA-13_genebank.gb_genome (77415/14/1)	gene	LysR family transcriptional regulator
E2E33_007300	E2E33_007300, MBF8418132.1	MA-13_genebank.gb_genome (77415/14/1)	gene	CidA/LrgA family holin-like protein
E2E33_007305	E2E33_007305, MBF8418133.1	MA-13_genebank.gb_genome (77415/14/1)	gene	LrgB family protein
E2E33_007315	E2E33_007315, MBF8418135.1, ybaK	MA-13_genebank.gb_genome (77415/14/1)	gene	Cys-tRNA(Pro) deacylase
E2E33_007340	E2E33_007340, MBF8418140.1	MA-13_genebank.gb_genome (77415/14/1)	gene	alpha/beta hydrolase
E2E33_007345	E2E33_007345, MBF8418141.1	MA-13_genebank.gb_genome (77415/14/1)	gene	MurR/RpiR family transcriptional regulator
E2E33_007350	E2E33_007350, MBF8418142.1	MA-13_genebank.gb_genome (77415/14/1)	gene	alkaline phosphatase
E2E33_007355	3.6.4.12, E2E33_007355, MBF8418143.1, recQ	MA-13_genebank.gb_genome (77415/14/1)	gene	DNA helicase RecQ
E2E33_007360	E2E33_007360, MBF8418144.1	MA-13_genebank.gb_genome (77415/14/1)	gene	Cof-type HAD-IIB family hydrolase
E2E33_007365	E2E33_007365, MBF8418145.1, bshB2	MA-13_genebank.gb_genome (77415/14/1)	gene	bacillithiol biosynthesis deacetylase BshB2
E2E33_007370	E2E33_007370, MBF8418146.1	MA-13_genebank.gb_genome (77415/14/1)	gene	YojF family protein
E2E33_007375	E2E33_007375, MBF8418147.1, pdxK	MA-13_genebank.gb_genome (77415/14/1)	gene	pyridoxine/pyridoxal/pyridoxamine kinase
E2E33_007380	E2E33_007380, MBF8418148.1	MA-13_genebank.gb_genome (77415/14/1)	gene	Rrf2 family transcriptional regulator
E2E33_007385	E2E33_007385, MBF8418149.1	MA-13_genebank.gb_genome (77415/14/1)	gene	cysteine desulfurase
E2E33_007390	2.8.1.13, E2E33_007390, MBF8418150.1, mnmA	MA-13_genebank.gb_genome (77415/14/1)	gene	tRNA 2-thiouridine(34) synthase MnmA
E2E33_007395	E2E33_007395, MBF8418151.1	MA-13_genebank.gb_genome (77415/14/1)	gene	tetratricopeptide repeat protein
E2E33_007400	E2E33_007400, MBF8418152.1	MA-13_genebank.gb_genome (77415/14/1)	gene	ATP-dependent RecD-like DNA helicase
E2E33_007405	E2E33_007405, MBF8418153.1	MA-13_genebank.gb_genome (77415/14/1)	gene	YndM family protein
E2E33_007410	E2E33_007410, MBF8418154.1	MA-13_genebank.gb_genome (77415/14/1)	gene	hypothetical protein
E2E33_007420	E2E33_007420, MBF8418156.1	MA-13_genebank.gb_genome (77415/14/1)	gene	AI-2E family transporter
E2E33_007425	6.1.1.7, E2E33_007425, MBF8418157.1, alaS	MA-13_genebank.gb_genome (77415/14/1)	gene	alanine--tRNA ligase
E2E33_007430	E2E33_007430, MBF8418158.1	MA-13_genebank.gb_genome (77415/14/1)	gene	IreB family regulatory phosphoprotein
E2E33_007435	E2E33_007435, MBF8418159.1, ruvX	MA-13_genebank.gb_genome (77415/14/1)	gene	Holliday junction resolvase RuvX
E2E33_007440	E2E33_007440, MBF8418160.1	MA-13_genebank.gb_genome (77415/14/1)	gene	DUF1292 domain-containing protein
E2E33_007450	E2E33_007450, MBF8418162.1	MA-13_genebank.gb_genome (77415/14/1)	gene	O-methyltransferase
E2E33_007455	2.7.1.48, E2E33_007455, MBF8418163.1, udk	MA-13_genebank.gb_genome (77415/14/1)	gene	uridine kinase
E2E33_007460	E2E33_007460, MBF8418164.1, greA	MA-13_genebank.gb_genome (77415/14/1)	gene	transcription elongation factor GreA
E2E33_007465	E2E33_007465, MBF8418165.1	MA-13_genebank.gb_genome (77415/14/1)	gene	YrrS family protein
E2E33_007470	E2E33_007470, MBF8418166.1	MA-13_genebank.gb_genome (77415/14/1)	gene	YrzA family protein
E2E33_007475	3.2.2.16, 3.2.2.9, E2E33_007475, MBF8418167.1, mtnN	MA-13_genebank.gb_genome (77415/14/1)	gene	5'-methylthioadenosine/S-adenosylhomocysteine nucleosidase
E2E33_007480	E2E33_007480, MBF8418168.1	MA-13_genebank.gb_genome (77415/14/1)	gene	YrhC family protein
E2E33_007490	E2E33_007490, MBF8418170.1, ahpC	MA-13_genebank.gb_genome (77415/14/1)	gene	peroxiredoxin
E2E33_007495	1.8.1.-, E2E33_007495, MBF8418171.1, ahpF	MA-13_genebank.gb_genome (77415/14/1)	gene	alkyl hydroperoxide reductase subunit F
E2E33_007515	E2E33_007515, MBF8418175.1	MA-13_genebank.gb_genome (77415/14/1)	gene	cation transporter
E2E33_007565	E2E33_007565, MBF8418184.1	MA-13_genebank.gb_genome (77415/14/1)	gene	PDZ domain-containing protein
E2E33_007570	E2E33_007570, MBF8418185.1	MA-13_genebank.gb_genome (77415/14/1)	gene	MarR family transcriptional regulator
E2E33_007575	E2E33_007575, MBF8418186.1	MA-13_genebank.gb_genome (77415/14/1)	gene	serine protease
E2E33_007580	E2E33_007580, MBF8418187.1	MA-13_genebank.gb_genome (77415/14/1)	gene	MATE family efflux transporter
E2E33_007585	E2E33_007585, MBF8418188.1	MA-13_genebank.gb_genome (77415/14/1)	gene	hypothetical protein
E2E33_007590	5.1.1.7, E2E33_007590, MBF8418189.1	MA-13_genebank.gb_genome (77415/14/1)	gene	diaminopimelate epimerase
E2E33_007595	6.5.1.1, E2E33_007595, MBF8418190.1	MA-13_genebank.gb_genome (77415/14/1)	gene	DNA ligase D
E2E33_007600	E2E33_007600, MBF8418191.1	MA-13_genebank.gb_genome (77415/14/1)	gene	Ku protein
E2E33_007610	E2E33_007610, MBF8418193.1	MA-13_genebank.gb_genome (77415/14/1)	gene	LTA synthase family protein
E2E33_007615	E2E33_007615, MBF8418194.1	MA-13_genebank.gb_genome (77415/14/1)	gene	thioredoxin domain-containing protein
E2E33_007620	E2E33_007620, MBF8418195.1	MA-13_genebank.gb_genome (77415/14/1)	gene	MFS transporter
E2E33_007625	E2E33_007625, MBF8418196.1	MA-13_genebank.gb_genome (77415/14/1)	gene	response regulator transcription factor
E2E33_007635	E2E33_007635, MBF8418198.1	MA-13_genebank.gb_genome (77415/14/1)	gene	HSP20-like chaperone
E2E33_007645	2.3.1.61, E2E33_007645, MBF8418200.1, odhB	MA-13_genebank.gb_genome (77415/14/1)	gene	2-oxoglutarate dehydrogenase complex dihydrolipoyllysine-residue succinyltransferase
E2E33_007650	E2E33_007650, MBF8418201.1	MA-13_genebank.gb_genome (77415/14/1)	gene	aldehyde dehydrogenase family protein
E2E33_007655	E2E33_007655, MBF8418202.1	MA-13_genebank.gb_genome (77415/14/1)	gene	competence protein ComK
E2E33_007660	E2E33_007660, MBF8418203.1, yidC	MA-13_genebank.gb_genome (77415/14/1)	gene	membrane protein insertase YidC
E2E33_007665	E2E33_007665, MBF8418204.1	MA-13_genebank.gb_genome (77415/14/1)	gene	hypothetical protein
E2E33_007675	E2E33_007675, MBF8418206.1	MA-13_genebank.gb_genome (77415/14/1)	gene	DNA topoisomerase III
E2E33_007680	E2E33_007680, MBF8418207.1	MA-13_genebank.gb_genome (77415/14/1)	gene	rhodanese-related sulfurtransferase
E2E33_007685	E2E33_007685, MBF8418208.1	MA-13_genebank.gb_genome (77415/14/1)	gene	SOS response-associated peptidase
E2E33_007690	E2E33_007690, MBF8418209.1, thiT	MA-13_genebank.gb_genome (77415/14/1)	gene	energy-coupled thiamine transporter ThiT
E2E33_007700	E2E33_007700, MBF8418210.1	MA-13_genebank.gb_genome (77415/14/1)	gene	CBS domain-containing protein
E2E33_007710	E2E33_007710, MBF8418212.1	MA-13_genebank.gb_genome (77415/14/1)	gene	LysM peptidoglycan-binding domain-containing protein
E2E33_007715	E2E33_007715, MBF8418213.1	MA-13_genebank.gb_genome (77415/14/1)	gene	DNA topoisomerase III
E2E33_007720	E2E33_007720, MBF8418214.1	MA-13_genebank.gb_genome (77415/14/1)	gene	amino acid permease
E2E33_007725	E2E33_007725, MBF8418215.1	MA-13_genebank.gb_genome (77415/14/1)	gene	magnesium transporter CorA family protein
E2E33_007730	E2E33_007730, MBF8418216.1	MA-13_genebank.gb_genome (77415/14/1)	gene	hypothetical protein
E2E33_007735	E2E33_007735, MBF8418217.1	MA-13_genebank.gb_genome (77415/14/1)	gene	ATP phosphoribosyltransferase regulatory subunit
E2E33_007740	2.4.2.17, E2E33_007740, MBF8418218.1	MA-13_genebank.gb_genome (77415/14/1)	gene	ATP phosphoribosyltransferase
E2E33_007745	1.1.1.23, E2E33_007745, MBF8418219.1, hisD	MA-13_genebank.gb_genome (77415/14/1)	gene	histidinol dehydrogenase
E2E33_007750	4.2.1.19, E2E33_007750, MBF8418220.1, hisB	MA-13_genebank.gb_genome (77415/14/1)	gene	imidazoleglycerol-phosphate dehydratase HisB
E2E33_007755	E2E33_007755, MBF8418221.1, hisH	MA-13_genebank.gb_genome (77415/14/1)	gene	imidazole glycerol phosphate synthase subunit HisH
E2E33_007760	5.3.1.16, E2E33_007760, MBF8418222.1, hisA	MA-13_genebank.gb_genome (77415/14/1)	gene	1-(5-phosphoribosyl)-5-[(5- phosphoribosylamino)methylideneamino]imidazole-4- carboxamide isomerase
E2E33_007765	4.1.3.-, E2E33_007765, MBF8418223.1, hisF	MA-13_genebank.gb_genome (77415/14/1)	gene	imidazole glycerol phosphate synthase subunit HisF
E2E33_007770	3.5.4.19, 3.6.1.31, E2E33_007770, MBF8418224.1	MA-13_genebank.gb_genome (77415/14/1)	gene	bifunctional phosphoribosyl-AMP cyclohydrolase/phosphoribosyl-ATP diphosphatase HisIE
E2E33_007775	E2E33_007775, MBF8418225.1, yedF	MA-13_genebank.gb_genome (77415/14/1)	gene	sulfurtransferase-like selenium metabolism protein YedF
E2E33_007780	E2E33_007780, MBF8418226.1, yedE	MA-13_genebank.gb_genome (77415/14/1)	gene	selenium metabolism membrane protein YedE/FdhT
E2E33_007800	E2E33_007800, MBF8418230.1	MA-13_genebank.gb_genome (77415/14/1)	gene	DUF1836 domain-containing protein
E2E33_007805	E2E33_007805, MBF8418231.1	MA-13_genebank.gb_genome (77415/14/1)	gene	hypothetical protein
E2E33_007810	E2E33_007810, MBF8418232.1	MA-13_genebank.gb_genome (77415/14/1)	gene	YxcD family protein
E2E33_007825	E2E33_007825, MBF8418235.1	MA-13_genebank.gb_genome (77415/14/1)	gene	phasin family protein
E2E33_007835	E2E33_007835, MBF8418237.1	MA-13_genebank.gb_genome (77415/14/1)	gene	hypothetical protein
E2E33_007840	E2E33_007840, MBF8418238.1	MA-13_genebank.gb_genome (77415/14/1)	gene	cold-shock protein
E2E33_007845	3.5.4.16, E2E33_007845, MBF8418239.1, folE	MA-13_genebank.gb_genome (77415/14/1)	gene	GTP cyclohydrolase I FolE
E2E33_007850	E2E33_007850, MBF8418240.1	MA-13_genebank.gb_genome (77415/14/1)	gene	NAD(P)/FAD-dependent oxidoreductase
E2E33_007855	E2E33_007855, MBF8418241.1	MA-13_genebank.gb_genome (77415/14/1)	gene	DUF1292 domain-containing protein
E2E33_007860	E2E33_007860, MBF8418242.1	MA-13_genebank.gb_genome (77415/14/1)	gene	hypothetical protein
E2E33_007865	E2E33_007865, MBF8418243.1	MA-13_genebank.gb_genome (77415/14/1)	gene	ABC transporter permease
E2E33_007870	E2E33_007870, MBF8418244.1	MA-13_genebank.gb_genome (77415/14/1)	gene	ABC transporter ATP-binding protein
E2E33_007875	E2E33_007875, MBF8418245.1	MA-13_genebank.gb_genome (77415/14/1)	gene	sensor histidine kinase
E2E33_007880	E2E33_007880, MBF8418246.1	MA-13_genebank.gb_genome (77415/14/1)	gene	response regulator transcription factor
E2E33_007910	E2E33_007910, MBF8418252.1	MA-13_genebank.gb_genome (77415/14/1)	gene	MFS transporter
E2E33_007930	E2E33_007930, MBF8418256.1	MA-13_genebank.gb_genome (77415/14/1)	gene	alpha/beta-type small acid-soluble spore protein
E2E33_007935	E2E33_007935, MBF8418257.1	MA-13_genebank.gb_genome (77415/14/1)	gene	CidA/LrgA family protein
E2E33_007940	E2E33_007940, MBF8418258.1	MA-13_genebank.gb_genome (77415/14/1)	gene	LrgB family protein
E2E33_007945	E2E33_007945, MBF8418259.1	MA-13_genebank.gb_genome (77415/14/1)	gene	long-chain fatty acid--CoA ligase
E2E33_007950	E2E33_007950, MBF8418260.1	MA-13_genebank.gb_genome (77415/14/1)	gene	lytic transglycosylase domain-containing protein
E2E33_007955	E2E33_007955, MBF8418261.1	MA-13_genebank.gb_genome (77415/14/1)	gene	GlsB/YeaQ/YmgE family stress response membrane protein
E2E33_007965	E2E33_007965, MBF8418263.1	MA-13_genebank.gb_genome (77415/14/1)	gene	hypothetical protein
E2E33_007970	E2E33_007970, MBF8418264.1	MA-13_genebank.gb_genome (77415/14/1)	gene	aminopeptidase
E2E33_007980	4.2.1.3, E2E33_007980, MBF8418266.1, acnA	MA-13_genebank.gb_genome (77415/14/1)	gene	aconitate hydratase AcnA
E2E33_007995	E2E33_007995, MBF8418269.1, tlp	MA-13_genebank.gb_genome (77415/14/1)	gene	small acid-soluble spore protein Tlp
E2E33_008000	E2E33_008000, MBF8418270.1	MA-13_genebank.gb_genome (77415/14/1)	gene	acyl-CoA thioesterase
E2E33_008005	E2E33_008005, MBF8418271.1	MA-13_genebank.gb_genome (77415/14/1)	gene	hypothetical protein
E2E33_008010	E2E33_008010, MBF8418272.1	MA-13_genebank.gb_genome (77415/14/1)	gene	HesB/YadR/YfhF family protein
E2E33_008015	E2E33_008015, MBF8418273.1, plsY	MA-13_genebank.gb_genome (77415/14/1)	gene	glycerol-3-phosphate 1-O-acyltransferase PlsY
E2E33_008020	E2E33_008020, MBF8418274.1	MA-13_genebank.gb_genome (77415/14/1)	gene	CoA-binding protein
E2E33_008025	E2E33_008025, MBF8418275.1, parE	MA-13_genebank.gb_genome (77415/14/1)	gene	DNA topoisomerase IV subunit B
E2E33_008030	E2E33_008030, MBF8418276.1, parC	MA-13_genebank.gb_genome (77415/14/1)	gene	DNA topoisomerase IV subunit A
E2E33_008035	E2E33_008035, MBF8418277.1	MA-13_genebank.gb_genome (77415/14/1)	gene	hypothetical protein
E2E33_008045	E2E33_008045, MBF8418278.1	MA-13_genebank.gb_genome (77415/14/1)	gene	kinase/pyrophosphorylase
E2E33_008075	E2E33_008075, MBF8418283.1	MA-13_genebank.gb_genome (77415/14/1)	gene	nitronate monooxygenase
E2E33_008080	3.4.21.89, E2E33_008080, MBF8418284.1, lepB	MA-13_genebank.gb_genome (77415/14/1)	gene	signal peptidase I
E2E33_008085	E2E33_008085, MBF8418285.1	MA-13_genebank.gb_genome (77415/14/1)	gene	ECF transporter S component
E2E33_008090	E2E33_008090, MBF8418286.1	MA-13_genebank.gb_genome (77415/14/1)	gene	ferredoxin
E2E33_008095	E2E33_008095, MBF8418287.1	MA-13_genebank.gb_genome (77415/14/1)	gene	helix-turn-helix domain-containing protein
E2E33_008100	E2E33_008100, MBF8418288.1	MA-13_genebank.gb_genome (77415/14/1)	gene	ATP-dependent DNA helicase RecQ
E2E33_008105	E2E33_008105, MBF8418289.1	MA-13_genebank.gb_genome (77415/14/1)	gene	CPBP family intramembrane metalloprotease
E2E33_008110	E2E33_008110, MBF8418290.1	MA-13_genebank.gb_genome (77415/14/1)	gene	hypothetical protein
E2E33_008115	E2E33_008115, MBF8418291.1	MA-13_genebank.gb_genome (77415/14/1)	gene	YpbF family protein
E2E33_008120	E2E33_008120, MBF8418292.1	MA-13_genebank.gb_genome (77415/14/1)	gene	manganese catalase family protein
E2E33_008125	E2E33_008125, MBF8418293.1	MA-13_genebank.gb_genome (77415/14/1)	gene	spore coat protein CotJB
E2E33_008130	E2E33_008130, MBF8418294.1	MA-13_genebank.gb_genome (77415/14/1)	gene	spore coat associated protein CotJA
E2E33_008135	E2E33_008135, MBF8418295.1	MA-13_genebank.gb_genome (77415/14/1)	gene	metallophosphoesterase
E2E33_008140	E2E33_008140, MBF8418296.1	MA-13_genebank.gb_genome (77415/14/1)	gene	adaptor protein MecA
E2E33_008145	E2E33_008145, MBF8418297.1	MA-13_genebank.gb_genome (77415/14/1)	gene	Glu/Leu/Phe/Val dehydrogenase
E2E33_008155	E2E33_008155, MBF8418299.1, prsW	MA-13_genebank.gb_genome (77415/14/1)	gene	intramembrane metalloprotease PrsW
E2E33_008160	E2E33_008160, MBF8418300.1, sleB	MA-13_genebank.gb_genome (77415/14/1)	gene	spore cortex-lytic enzyme
E2E33_008170	E2E33_008170, MBF8418302.1	MA-13_genebank.gb_genome (77415/14/1)	gene	flagellar brake domain-containing protein
E2E33_008175	2.7.4.25, E2E33_008175, MBF8418303.1	MA-13_genebank.gb_genome (77415/14/1)	gene	(d)CMP kinase
E2E33_008180	E2E33_008180, MBF8418304.1, rpsA	MA-13_genebank.gb_genome (77415/14/1)	gene	30S ribosomal protein S1
E2E33_008190	E2E33_008190, MBF8418306.1	MA-13_genebank.gb_genome (77415/14/1)	gene	hypothetical protein
E2E33_008195	E2E33_008195, MBF8418307.1, der	MA-13_genebank.gb_genome (77415/14/1)	gene	ribosome biogenesis GTPase Der
E2E33_008200	1.1.1.94, E2E33_008200, MBF8418308.1	MA-13_genebank.gb_genome (77415/14/1)	gene	NAD(P)H-dependent glycerol-3-phosphate dehydrogenase
E2E33_008205	E2E33_008205, MBF8418309.1	MA-13_genebank.gb_genome (77415/14/1)	gene	DUF2768 domain-containing protein
E2E33_008215	E2E33_008215, MBF8418311.1, spoIVA	MA-13_genebank.gb_genome (77415/14/1)	gene	stage IV sporulation protein A
E2E33_008220	E2E33_008220, MBF8418312.1	MA-13_genebank.gb_genome (77415/14/1)	gene	HU family DNA-binding protein
E2E33_008230	E2E33_008230, MBF8418314.1	MA-13_genebank.gb_genome (77415/14/1)	gene	heptaprenyl diphosphate synthase component 1
E2E33_008240	E2E33_008240, MBF8418316.1, hepT	MA-13_genebank.gb_genome (77415/14/1)	gene	heptaprenyl diphosphate synthase component II
E2E33_008245	2.7.4.6, E2E33_008245, MBF8418317.1, ndk	MA-13_genebank.gb_genome (77415/14/1)	gene	nucleoside-diphosphate kinase
E2E33_008250	E2E33_008250, MBF8418318.1	MA-13_genebank.gb_genome (77415/14/1)	gene	protein-glutamate O-methyltransferase CheR
E2E33_008255	4.2.3.5, E2E33_008255, MBF8418319.1, aroC	MA-13_genebank.gb_genome (77415/14/1)	gene	chorismate synthase
E2E33_008260	4.2.3.4, E2E33_008260, MBF8418320.1	MA-13_genebank.gb_genome (77415/14/1)	gene	3-dehydroquinate synthase
E2E33_008265	5.4.99.5, E2E33_008265, MBF8418321.1, aroH	MA-13_genebank.gb_genome (77415/14/1)	gene	chorismate mutase
E2E33_008280	2.5.1.19, E2E33_008280, MBF8418324.1, aroA	MA-13_genebank.gb_genome (77415/14/1)	gene	3-phosphoshikimate 1-carboxyvinyltransferase
E2E33_008285	E2E33_008285, MBF8418325.1	MA-13_genebank.gb_genome (77415/14/1)	gene	tetratricopeptide repeat protein
E2E33_008290	E2E33_008290, MBF8418326.1	MA-13_genebank.gb_genome (77415/14/1)	gene	YpiB family protein
E2E33_008295	E2E33_008295, MBF8418327.1	MA-13_genebank.gb_genome (77415/14/1)	gene	YpiF family protein
E2E33_008315	E2E33_008315, MBF8418331.1	MA-13_genebank.gb_genome (77415/14/1)	gene	DUF1405 domain-containing protein
E2E33_008320	E2E33_008320, MBF8418332.1, ypjB	MA-13_genebank.gb_genome (77415/14/1)	gene	sporulation protein YpjB
E2E33_008330	E2E33_008330, MBF8418334.1	MA-13_genebank.gb_genome (77415/14/1)	gene	QueT transporter family protein
E2E33_008335	E2E33_008335, MBF8418335.1	MA-13_genebank.gb_genome (77415/14/1)	gene	YitT family protein
E2E33_008340	E2E33_008340, MBF8418336.1	MA-13_genebank.gb_genome (77415/14/1)	gene	nucleotide pyrophosphohydrolase
E2E33_008345	1.17.1.8, E2E33_008345, MBF8418337.1	MA-13_genebank.gb_genome (77415/14/1)	gene	4-hydroxy-tetrahydrodipicolinate reductase
E2E33_008355	E2E33_008355, MBF8418339.1, bshA	MA-13_genebank.gb_genome (77415/14/1)	gene	N-acetyl-alpha-D-glucosaminyl L-malate synthase BshA
E2E33_008360	2.7.7.72, E2E33_008360, MBF8418340.1	MA-13_genebank.gb_genome (77415/14/1)	gene	CCA tRNA nucleotidyltransferase
E2E33_008365	6.3.4.15, E2E33_008365, MBF8418341.1	MA-13_genebank.gb_genome (77415/14/1)	gene	biotin--[acetyl-CoA-carboxylase] ligase
E2E33_008370	2.1.2.11, E2E33_008370, MBF8418342.1, panB	MA-13_genebank.gb_genome (77415/14/1)	gene	3-methyl-2-oxobutanoate hydroxymethyltransferase
E2E33_008375	6.3.2.1, E2E33_008375, MBF8418343.1	MA-13_genebank.gb_genome (77415/14/1)	gene	pantoate--beta-alanine ligase
E2E33_008380	4.1.1.11, E2E33_008380, MBF8418344.1, panD	MA-13_genebank.gb_genome (77415/14/1)	gene	aspartate 1-decarboxylase
E2E33_008385	E2E33_008385, MBF8418345.1, dinG	MA-13_genebank.gb_genome (77415/14/1)	gene	ATP-dependent DNA helicase DinG
E2E33_008390	E2E33_008390, MBF8418346.1	MA-13_genebank.gb_genome (77415/14/1)	gene	DUF5590 domain-containing protein
E2E33_008395	E2E33_008395, MBF8418347.1	MA-13_genebank.gb_genome (77415/14/1)	gene	pyridoxal phosphate-dependent aminotransferase
E2E33_008400	6.1.1.22, E2E33_008400, MBF8418348.1, asnS	MA-13_genebank.gb_genome (77415/14/1)	gene	asparagine--tRNA ligase
E2E33_008405	E2E33_008405, MBF8418349.1	MA-13_genebank.gb_genome (77415/14/1)	gene	DnaD domain-containing protein
E2E33_008410	E2E33_008410, MBF8418350.1, nth	MA-13_genebank.gb_genome (77415/14/1)	gene	endonuclease III
E2E33_008415	E2E33_008415, MBF8418351.1	MA-13_genebank.gb_genome (77415/14/1)	gene	PBP1A family penicillin-binding protein
E2E33_008420	E2E33_008420, MBF8418352.1, recU	MA-13_genebank.gb_genome (77415/14/1)	gene	Holliday junction resolvase RecU
E2E33_008430	E2E33_008430, MBF8418354.1	MA-13_genebank.gb_genome (77415/14/1)	gene	hypothetical protein
E2E33_008435	E2E33_008435, MBF8418355.1	MA-13_genebank.gb_genome (77415/14/1)	gene	YppE family protein
E2E33_008445	E2E33_008445, MBF8418357.1	MA-13_genebank.gb_genome (77415/14/1)	gene	Hsp20/alpha crystallin family protein
E2E33_008455	E2E33_008455, MBF8418359.1	MA-13_genebank.gb_genome (77415/14/1)	gene	ribonuclease H-like domain-containing protein
E2E33_008460	E2E33_008460, MBF8418360.1	MA-13_genebank.gb_genome (77415/14/1)	gene	hypothetical protein
E2E33_008465	E2E33_008465, MBF8418361.1	MA-13_genebank.gb_genome (77415/14/1)	gene	DUF1273 domain-containing protein
E2E33_008470	E2E33_008470, MBF8418362.1, gpsB	MA-13_genebank.gb_genome (77415/14/1)	gene	cell division regulator GpsB
E2E33_008480	E2E33_008480, MBF8418363.1	MA-13_genebank.gb_genome (77415/14/1)	gene	class I SAM-dependent RNA methyltransferase
E2E33_008485	E2E33_008485, MBF8418364.1	MA-13_genebank.gb_genome (77415/14/1)	gene	carboxypeptidase M32
E2E33_008490	2.4.2.22, E2E33_008490, MBF8418365.1	MA-13_genebank.gb_genome (77415/14/1)	gene	xanthine phosphoribosyltransferase
E2E33_008495	E2E33_008495, MBF8418366.1	MA-13_genebank.gb_genome (77415/14/1)	gene	purine permease
E2E33_008505	E2E33_008505, MBF8418368.1	MA-13_genebank.gb_genome (77415/14/1)	gene	methionine aminopeptidase
E2E33_008510	E2E33_008510, MBF8418369.1	MA-13_genebank.gb_genome (77415/14/1)	gene	dynamin family protein
E2E33_008515	E2E33_008515, MBF8418370.1	MA-13_genebank.gb_genome (77415/14/1)	gene	MerR family transcriptional regulator
E2E33_008520	6.3.1.2, E2E33_008520, MBF8418371.1, glnA	MA-13_genebank.gb_genome (77415/14/1)	gene	type I glutamate--ammonia ligase
E2E33_008540	E2E33_008540, MBF8418375.1	MA-13_genebank.gb_genome (77415/14/1)	gene	spore germination protein
E2E33_008545	E2E33_008545, MBF8418376.1	MA-13_genebank.gb_genome (77415/14/1)	gene	spore gernimation protein
E2E33_008550	E2E33_008550, MBF8418377.1	MA-13_genebank.gb_genome (77415/14/1)	gene	spore germination protein GerPC
E2E33_008555	E2E33_008555, MBF8418378.1	MA-13_genebank.gb_genome (77415/14/1)	gene	spore gernimation protein GerPD
E2E33_008560	E2E33_008560, MBF8418379.1	MA-13_genebank.gb_genome (77415/14/1)	gene	spore germination protein GerPE
E2E33_008565	E2E33_008565, MBF8418380.1	MA-13_genebank.gb_genome (77415/14/1)	gene	spore germination protein
E2E33_008575	E2E33_008575, MBF8418382.1, addB	MA-13_genebank.gb_genome (77415/14/1)	gene	helicase-exonuclease AddAB subunit AddB
E2E33_008580	E2E33_008580, MBF8418383.1	MA-13_genebank.gb_genome (77415/14/1)	gene	TIGR00266 family protein
E2E33_008585	E2E33_008585, MBF8418384.1	MA-13_genebank.gb_genome (77415/14/1)	gene	competence protein ComK
E2E33_008590	E2E33_008590, MBF8418385.1	MA-13_genebank.gb_genome (77415/14/1)	gene	IDEAL domain-containing protein
E2E33_008595	E2E33_008595, MBF8418386.1	MA-13_genebank.gb_genome (77415/14/1)	gene	M48 family metallopeptidase
E2E33_008600	E2E33_008600, MBF8418387.1	MA-13_genebank.gb_genome (77415/14/1)	gene	AzlD domain-containing protein
E2E33_008605	E2E33_008605, MBF8418388.1	MA-13_genebank.gb_genome (77415/14/1)	gene	AzlC family ABC transporter permease
E2E33_008620	6.3.1.20, E2E33_008620, MBF8418391.1	MA-13_genebank.gb_genome (77415/14/1)	gene	lipoate--protein ligase
E2E33_008645	E2E33_008645, MBF8418394.1	MA-13_genebank.gb_genome (77415/14/1)	gene	DMT family transporter
E2E33_008660	E2E33_008660, MBF8418395.1	MA-13_genebank.gb_genome (77415/14/1)	gene	YhgE/Pip domain-containing protein
E2E33_008665	E2E33_008665, MBF8418396.1	MA-13_genebank.gb_genome (77415/14/1)	gene	TetR/AcrR family transcriptional regulator
E2E33_008670	1.3.3.4, E2E33_008670, MBF8418397.1, hemY	MA-13_genebank.gb_genome (77415/14/1)	gene	protoporphyrinogen oxidase
E2E33_008675	4.99.1.1, E2E33_008675, MBF8418398.1, hemH	MA-13_genebank.gb_genome (77415/14/1)	gene	ferrochelatase
E2E33_008680	4.1.1.37, E2E33_008680, MBF8418399.1, hemE	MA-13_genebank.gb_genome (77415/14/1)	gene	uroporphyrinogen decarboxylase
E2E33_008685	E2E33_008685, MBF8418400.1	MA-13_genebank.gb_genome (77415/14/1)	gene	antibiotic biosynthesis monooxygenase
E2E33_008690	E2E33_008690, MBF8418401.1	MA-13_genebank.gb_genome (77415/14/1)	gene	hypothetical protein
E2E33_008700	E2E33_008700, MBF8418403.1	MA-13_genebank.gb_genome (77415/14/1)	gene	ABC transporter permease
E2E33_008705	E2E33_008705, MBF8418404.1	MA-13_genebank.gb_genome (77415/14/1)	gene	ABC transporter ATP-binding protein
E2E33_008710	E2E33_008710, MBF8418405.1	MA-13_genebank.gb_genome (77415/14/1)	gene	HIT family protein
E2E33_008715	E2E33_008715, MBF8418406.1	MA-13_genebank.gb_genome (77415/14/1)	gene	tryptophan transporter
E2E33_008720	E2E33_008720, MBF8418407.1	MA-13_genebank.gb_genome (77415/14/1)	gene	hypothetical protein
E2E33_008725	E2E33_008725, MBF8418408.1	MA-13_genebank.gb_genome (77415/14/1)	gene	YtxH domain-containing protein
E2E33_008730	E2E33_008730, MBF8418409.1	MA-13_genebank.gb_genome (77415/14/1)	gene	HTH-type transcriptional regulator Hpr
E2E33_008735	E2E33_008735, MBF8418410.1	MA-13_genebank.gb_genome (77415/14/1)	gene	YhaI family protein
E2E33_008745	E2E33_008745, MBF8418412.1	MA-13_genebank.gb_genome (77415/14/1)	gene	peptidylprolyl isomerase
E2E33_008750	E2E33_008750, MBF8418413.1	MA-13_genebank.gb_genome (77415/14/1)	gene	sporulation YhaL family protein
E2E33_008755	E2E33_008755, MBF8418414.1, yhaM	MA-13_genebank.gb_genome (77415/14/1)	gene	3'-5' exoribonuclease YhaM
E2E33_008760	E2E33_008760, MBF8418415.1	MA-13_genebank.gb_genome (77415/14/1)	gene	AAA family ATPase
E2E33_008765	E2E33_008765, MBF8418416.1	MA-13_genebank.gb_genome (77415/14/1)	gene	DNA repair exonuclease
E2E33_008775	E2E33_008775, MBF8418418.1	MA-13_genebank.gb_genome (77415/14/1)	gene	permease
E2E33_008780	E2E33_008780, MBF8418419.1	MA-13_genebank.gb_genome (77415/14/1)	gene	TerC family protein
E2E33_008785	E2E33_008785, MBF8418420.1	MA-13_genebank.gb_genome (77415/14/1)	gene	hypothetical protein
E2E33_008790	4.2.1.17, E2E33_008790, MBF8418421.1	MA-13_genebank.gb_genome (77415/14/1)	gene	enoyl-CoA hydratase
E2E33_008795	E2E33_008795, MBF8418422.1	MA-13_genebank.gb_genome (77415/14/1)	gene	HAD family phosphatase
E2E33_008800	E2E33_008800, MBF8418423.1	MA-13_genebank.gb_genome (77415/14/1)	gene	YlbF family regulator
E2E33_008805	E2E33_008805, MBF8418424.1	MA-13_genebank.gb_genome (77415/14/1)	gene	DUF445 domain-containing protein
E2E33_008820	E2E33_008820, MBF8418427.1	MA-13_genebank.gb_genome (77415/14/1)	gene	YheC/YheD family protein
E2E33_008825	E2E33_008825, MBF8418428.1	MA-13_genebank.gb_genome (77415/14/1)	gene	YheC/YheD family protein
E2E33_008830	E2E33_008830, MBF8418429.1	MA-13_genebank.gb_genome (77415/14/1)	gene	helix-turn-helix domain-containing protein
E2E33_008835	E2E33_008835, MBF8418430.1, ugpC	MA-13_genebank.gb_genome (77415/14/1)	gene	sn-glycerol-3-phosphate ABC transporter ATP-binding protein UgpC
E2E33_008840	E2E33_008840, MBF8418431.1	MA-13_genebank.gb_genome (77415/14/1)	gene	alpha/beta-type small acid-soluble spore protein
E2E33_008845	4.2.1.2, E2E33_008845, MBF8418432.1, fumC	MA-13_genebank.gb_genome (77415/14/1)	gene	class II fumarate hydratase
E2E33_008860	E2E33_008860, MBF8418435.1	MA-13_genebank.gb_genome (77415/14/1)	gene	GNAT family N-acetyltransferase
E2E33_008865	E2E33_008865, MBF8418436.1	MA-13_genebank.gb_genome (77415/14/1)	gene	2'-5' RNA ligase family protein
E2E33_008870	E2E33_008870, MBF8418437.1	MA-13_genebank.gb_genome (77415/14/1)	gene	esterase family protein
E2E33_008890	E2E33_008890, MBF8418441.1	MA-13_genebank.gb_genome (77415/14/1)	gene	ROK family protein
E2E33_008900	E2E33_008900, MBF8418442.1	MA-13_genebank.gb_genome (77415/14/1)	gene	ABC transporter ATP-binding protein
E2E33_008905	E2E33_008905, MBF8418443.1	MA-13_genebank.gb_genome (77415/14/1)	gene	ABC transporter permease
E2E33_008910	E2E33_008910, MBF8418444.1	MA-13_genebank.gb_genome (77415/14/1)	gene	hypothetical protein
E2E33_008915	E2E33_008915, MBF8418445.1	MA-13_genebank.gb_genome (77415/14/1)	gene	C1 family peptidase
E2E33_008925	E2E33_008925, MBF8418447.1	MA-13_genebank.gb_genome (77415/14/1)	gene	YkuS family protein
E2E33_008940	E2E33_008940, MBF8418450.1	MA-13_genebank.gb_genome (77415/14/1)	gene	chromate transporter
E2E33_008945	E2E33_008945, MBF8418451.1	MA-13_genebank.gb_genome (77415/14/1)	gene	chromate transporter
E2E33_008950	E2E33_008950, MBF8418452.1	MA-13_genebank.gb_genome (77415/14/1)	gene	Lrp/AsnC family transcriptional regulator
E2E33_008965	E2E33_008965, MBF8418453.1	MA-13_genebank.gb_genome (77415/14/1)	gene	PocR ligand-binding domain-containing protein
E2E33_008970	E2E33_008970, MBF8418454.1	MA-13_genebank.gb_genome (77415/14/1)	gene	acetate kinase
E2E33_009010	E2E33_009010, MBF8418461.1	MA-13_genebank.gb_genome (77415/14/1)	gene	IS3 family transposase
E2E33_009045	E2E33_009045, MBF8418467.1	MA-13_genebank.gb_genome (77415/14/1)	gene	5'-nucleotidase, lipoprotein e(P4) family
E2E33_009060	E2E33_009060, MBF8418468.1	MA-13_genebank.gb_genome (77415/14/1)	gene	acyl-CoA/acyl-ACP dehydrogenase
E2E33_009070	2.7.1.6, E2E33_009070, MBF8418470.1	MA-13_genebank.gb_genome (77415/14/1)	gene	galactokinase
E2E33_009075	5.1.3.2, E2E33_009075, MBF8418471.1, galE	MA-13_genebank.gb_genome (77415/14/1)	gene	UDP-glucose 4-epimerase GalE
E2E33_009085	E2E33_009085, MBF8418473.1	MA-13_genebank.gb_genome (77415/14/1)	gene	galactose mutarotase
E2E33_009090	E2E33_009090, MBF8418474.1	MA-13_genebank.gb_genome (77415/14/1)	gene	LacI family DNA-binding transcriptional regulator
E2E33_009095	E2E33_009095, MBF8418475.1	MA-13_genebank.gb_genome (77415/14/1)	gene	cold-shock protein
E2E33_009100	E2E33_009100, MBF8418476.1	MA-13_genebank.gb_genome (77415/14/1)	gene	hypothetical protein
E2E33_009105	E2E33_009105, MBF8418477.1	MA-13_genebank.gb_genome (77415/14/1)	gene	hypothetical protein
E2E33_009110	E2E33_009110, MBF8418478.1	MA-13_genebank.gb_genome (77415/14/1)	gene	VOC family protein
E2E33_009115	5.3.1.8, E2E33_009115, MBF8418479.1, manA	MA-13_genebank.gb_genome (77415/14/1)	gene	mannose-6-phosphate isomerase, class I
E2E33_009120	2.3.1.46, E2E33_009120, MBF8418480.1, metA	MA-13_genebank.gb_genome (77415/14/1)	gene	homoserine O-succinyltransferase
E2E33_009125	E2E33_009125, MBF8418481.1	MA-13_genebank.gb_genome (77415/14/1)	gene	MFS transporter
E2E33_009135	3.5.99.6, E2E33_009135, MBF8418483.1, nagB	MA-13_genebank.gb_genome (77415/14/1)	gene	glucosamine-6-phosphate deaminase
E2E33_009140	E2E33_009140, MBF8418484.1	MA-13_genebank.gb_genome (77415/14/1)	gene	GntR family transcriptional regulator
E2E33_009160	E2E33_009160, MBF8418486.1	MA-13_genebank.gb_genome (77415/14/1)	gene	flavodoxin
E2E33_009170	E2E33_009170, MBF8418488.1	MA-13_genebank.gb_genome (77415/14/1)	gene	Crp/Fnr family transcriptional regulator
E2E33_009175	E2E33_009175, MBF8418489.1, cadA	MA-13_genebank.gb_genome (77415/14/1)	gene	cadmium-translocating P-type ATPase
E2E33_009180	E2E33_009180, MBF8418490.1	MA-13_genebank.gb_genome (77415/14/1)	gene	heavy-metal-associated domain-containing protein
E2E33_009190	1.17.4.1, E2E33_009190, MBF8418491.1	MA-13_genebank.gb_genome (77415/14/1)	gene	ribonucleoside-diphosphate reductase subunit alpha
E2E33_009195	E2E33_009195, MBF8418492.1	MA-13_genebank.gb_genome (77415/14/1)	gene	flavodoxin
E2E33_009200	1.17.4.1, E2E33_009200, MBF8418493.1	MA-13_genebank.gb_genome (77415/14/1)	gene	ribonucleotide-diphosphate reductase subunit beta
E2E33_009205	E2E33_009205, MBF8418494.1	MA-13_genebank.gb_genome (77415/14/1)	gene	glycerol-3-phosphate acyltransferase
E2E33_009210	E2E33_009210, MBF8418495.1	MA-13_genebank.gb_genome (77415/14/1)	gene	glycosyltransferase
E2E33_009320	2.5.1.74, E2E33_009320, MBF8418497.1	MA-13_genebank.gb_genome (77415/14/1)	gene	1,4-dihydroxy-2-naphthoate polyprenyltransferase
E2E33_009325	5.4.4.2, E2E33_009325, MBF8418498.1	MA-13_genebank.gb_genome (77415/14/1)	gene	isochorismate synthase
E2E33_009335	4.2.99.20, E2E33_009335, MBF8418500.1, menH	MA-13_genebank.gb_genome (77415/14/1)	gene	2-succinyl-6-hydroxy-2, 4-cyclohexadiene-1-carboxylate synthase
E2E33_009340	4.1.3.36, E2E33_009340, MBF8418501.1, menB	MA-13_genebank.gb_genome (77415/14/1)	gene	1,4-dihydroxy-2-naphthoyl-CoA synthase
E2E33_009345	6.2.1.26, E2E33_009345, MBF8418502.1	MA-13_genebank.gb_genome (77415/14/1)	gene	o-succinylbenzoate--CoA ligase
E2E33_009360	E2E33_009360, MBF8418505.1	MA-13_genebank.gb_genome (77415/14/1)	gene	zinc ABC transporter substrate-binding protein
E2E33_009370	E2E33_009370, MBF8418507.1, yidD	MA-13_genebank.gb_genome (77415/14/1)	gene	membrane protein insertion efficiency factor YidD
E2E33_009375	E2E33_009375, MBF8418508.1	MA-13_genebank.gb_genome (77415/14/1)	gene	DNA starvation/stationary phase protection protein
E2E33_009380	E2E33_009380, MBF8418509.1	MA-13_genebank.gb_genome (77415/14/1)	gene	DUF1836 domain-containing protein
E2E33_009385	E2E33_009385, MBF8418510.1, ytkD	MA-13_genebank.gb_genome (77415/14/1)	gene	nucleoside triphosphatase YtkD
E2E33_009390	E2E33_009390, MBF8418511.1	MA-13_genebank.gb_genome (77415/14/1)	gene	ABC transporter permease
E2E33_009395	E2E33_009395, MBF8418512.1	MA-13_genebank.gb_genome (77415/14/1)	gene	ABC transporter ATP-binding protein
E2E33_009400	E2E33_009400, MBF8418513.1	MA-13_genebank.gb_genome (77415/14/1)	gene	ABC transporter substrate-binding protein
E2E33_009405	E2E33_009405, MBF8418514.1	MA-13_genebank.gb_genome (77415/14/1)	gene	hypothetical protein
E2E33_009415	E2E33_009415, MBF8418516.1	MA-13_genebank.gb_genome (77415/14/1)	gene	DUF2584 family protein
E2E33_009425	4.1.1.49, E2E33_009425, MBF8418518.1, pckA	MA-13_genebank.gb_genome (77415/14/1)	gene	phosphoenolpyruvate carboxykinase (ATP)
E2E33_009430	2.5.1.6, E2E33_009430, MBF8418519.1	MA-13_genebank.gb_genome (77415/14/1)	gene	methionine adenosyltransferase
E2E33_009435	6.3.5.4, E2E33_009435, MBF8418520.1, asnB	MA-13_genebank.gb_genome (77415/14/1)	gene	asparagine synthase (glutamine-hydrolyzing)
E2E33_009440	E2E33_009440, MBF8418521.1	MA-13_genebank.gb_genome (77415/14/1)	gene	gamma carbonic anhydrase family protein
E2E33_009445	E2E33_009445, MBF8418522.1	MA-13_genebank.gb_genome (77415/14/1)	gene	alpha/beta hydrolase
E2E33_009450	E2E33_009450, MBF8418523.1	MA-13_genebank.gb_genome (77415/14/1)	gene	tetraprenyl-beta-curcumene synthase family protein
E2E33_009455	E2E33_009455, MBF8418524.1	MA-13_genebank.gb_genome (77415/14/1)	gene	methyltransferase domain-containing protein
E2E33_009460	E2E33_009460, MBF8418525.1	MA-13_genebank.gb_genome (77415/14/1)	gene	YtzC family protein
E2E33_009465	E2E33_009465, MBF8418526.1	MA-13_genebank.gb_genome (77415/14/1)	gene	MFS transporter
E2E33_009470	6.1.1.4, E2E33_009470, MBF8418527.1	MA-13_genebank.gb_genome (77415/14/1)	gene	leucine--tRNA ligase
E2E33_009480	E2E33_009480, MBF8418529.1	MA-13_genebank.gb_genome (77415/14/1)	gene	sporulation protein Cse60
E2E33_009485	E2E33_009485, MBF8418530.1	MA-13_genebank.gb_genome (77415/14/1)	gene	polysaccharide biosynthesis protein
E2E33_009490	E2E33_009490, MBF8418531.1	MA-13_genebank.gb_genome (77415/14/1)	gene	DeoR/GlpR transcriptional regulator
E2E33_009495	E2E33_009495, MBF8418532.1, pepV	MA-13_genebank.gb_genome (77415/14/1)	gene	dipeptidase PepV
E2E33_009500	2.6.1.21, E2E33_009500, MBF8418533.1, dat	MA-13_genebank.gb_genome (77415/14/1)	gene	D-amino-acid transaminase
E2E33_009510	E2E33_009510, MBF8418535.1, thpR	MA-13_genebank.gb_genome (77415/14/1)	gene	RNA 2',3'-cyclic phosphodiesterase
E2E33_009515	E2E33_009515, MBF8418536.1	MA-13_genebank.gb_genome (77415/14/1)	gene	NERD domain-containing protein
E2E33_009525	E2E33_009525, MBF8418537.1	MA-13_genebank.gb_genome (77415/14/1)	gene	phosphotransferase family protein
E2E33_009530	E2E33_009530, MBF8418538.1	MA-13_genebank.gb_genome (77415/14/1)	gene	YtzH-like family protein
E2E33_009535	2.1.1.33, E2E33_009535, MBF8418539.1, trmB	MA-13_genebank.gb_genome (77415/14/1)	gene	tRNA (guanosine(46)-N7)-methyltransferase TrmB
E2E33_009540	E2E33_009540, MBF8418540.1	MA-13_genebank.gb_genome (77415/14/1)	gene	MBL fold metallo-hydrolase
E2E33_009545	E2E33_009545, MBF8418541.1	MA-13_genebank.gb_genome (77415/14/1)	gene	PepSY domain-containing protein
E2E33_009560	E2E33_009560, MBF8418544.1	MA-13_genebank.gb_genome (77415/14/1)	gene	fused response regulator/phosphatase
E2E33_009565	E2E33_009565, MBF8418545.1	MA-13_genebank.gb_genome (77415/14/1)	gene	thioredoxin family protein
E2E33_009570	E2E33_009570, MBF8418546.1	MA-13_genebank.gb_genome (77415/14/1)	gene	DUF1444 domain-containing protein
E2E33_009575	E2E33_009575, MBF8418547.1	MA-13_genebank.gb_genome (77415/14/1)	gene	DUF4479 domain-containing protein
E2E33_009585	E2E33_009585, MBF8418549.1	MA-13_genebank.gb_genome (77415/14/1)	gene	DNA translocase FtsK
E2E33_009590	6.3.2.8, E2E33_009590, MBF8418550.1	MA-13_genebank.gb_genome (77415/14/1)	gene	UDP-N-acetylmuramate--L-alanine ligase
E2E33_009595	E2E33_009595, MBF8418551.1	MA-13_genebank.gb_genome (77415/14/1)	gene	DUF948 domain-containing protein
E2E33_009600	E2E33_009600, MBF8418552.1	MA-13_genebank.gb_genome (77415/14/1)	gene	YtxH domain-containing protein
E2E33_009605	E2E33_009605, MBF8418553.1	MA-13_genebank.gb_genome (77415/14/1)	gene	bifunctional 3-deoxy-7-phosphoheptulonate synthase/chorismate mutase
E2E33_009610	E2E33_009610, MBF8418554.1, ccpA	MA-13_genebank.gb_genome (77415/14/1)	gene	catabolite control protein A
E2E33_009615	E2E33_009615, MBF8418555.1	MA-13_genebank.gb_genome (77415/14/1)	gene	acetoin utilization protein AcuC
E2E33_009620	E2E33_009620, MBF8418556.1	MA-13_genebank.gb_genome (77415/14/1)	gene	acetoin utilization AcuB family protein
E2E33_009625	E2E33_009625, MBF8418557.1	MA-13_genebank.gb_genome (77415/14/1)	gene	GNAT family N-acetyltransferase
E2E33_009630	6.2.1.1, E2E33_009630, MBF8418558.1, acsA	MA-13_genebank.gb_genome (77415/14/1)	gene	acetate--CoA ligase
E2E33_009670	E2E33_009670, MBF8418565.1	MA-13_genebank.gb_genome (77415/14/1)	gene	bile acid:sodium symporter family protein
E2E33_009675	E2E33_009675, MBF8418566.1	MA-13_genebank.gb_genome (77415/14/1)	gene	NFACT family protein
E2E33_009680	E2E33_009680, MBF8418567.1	MA-13_genebank.gb_genome (77415/14/1)	gene	cation-translocating P-type ATPase
E2E33_009685	E2E33_009685, MBF8418568.1	MA-13_genebank.gb_genome (77415/14/1)	gene	YicC family protein
E2E33_009690	E2E33_009690, MBF8418569.1	MA-13_genebank.gb_genome (77415/14/1)	gene	DUF370 domain-containing protein
E2E33_009695	2.7.4.8, E2E33_009695, MBF8418570.1, gmk	MA-13_genebank.gb_genome (77415/14/1)	gene	guanylate kinase
E2E33_009700	2.7.7.6, E2E33_009700, MBF8418571.1	MA-13_genebank.gb_genome (77415/14/1)	gene	DNA-directed RNA polymerase subunit omega
E2E33_009705	4.1.1.36, 6.3.2.5, E2E33_009705, MBF8418572.1, coaBC	MA-13_genebank.gb_genome (77415/14/1)	gene	bifunctional phosphopantothenoylcysteine decarboxylase/phosphopantothenate--cysteine ligase CoaBC
E2E33_009710	E2E33_009710, MBF8418573.1, priA	MA-13_genebank.gb_genome (77415/14/1)	gene	primosomal protein N'
E2E33_009715	3.5.1.88, E2E33_009715, MBF8418574.1	MA-13_genebank.gb_genome (77415/14/1)	gene	peptide deformylase
E2E33_009720	2.1.2.9, E2E33_009720, MBF8418575.1, fmt	MA-13_genebank.gb_genome (77415/14/1)	gene	methionyl-tRNA formyltransferase
E2E33_009725	2.1.1.176, E2E33_009725, MBF8418576.1, rsmB	MA-13_genebank.gb_genome (77415/14/1)	gene	16S rRNA (cytosine(967)-C(5))-methyltransferase RsmB
E2E33_009730	E2E33_009730, MBF8418577.1	MA-13_genebank.gb_genome (77415/14/1)	gene	Stp1/IreP family PP2C-type Ser/Thr phosphatase
E2E33_009735	E2E33_009735, MBF8418578.1, pknB	MA-13_genebank.gb_genome (77415/14/1)	gene	Stk1 family PASTA domain-containing Ser/Thr kinase
E2E33_009740	E2E33_009740, MBF8418579.1, rsgA	MA-13_genebank.gb_genome (77415/14/1)	gene	ribosome small subunit-dependent GTPase A
E2E33_009745	5.1.3.1, E2E33_009745, MBF8418580.1	MA-13_genebank.gb_genome (77415/14/1)	gene	ribulose-phosphate 3-epimerase
E2E33_009750	2.7.6.2, E2E33_009750, MBF8418581.1	MA-13_genebank.gb_genome (77415/14/1)	gene	thiamine diphosphokinase
E2E33_009760	E2E33_009760, MBF8418583.1	MA-13_genebank.gb_genome (77415/14/1)	gene	50S ribosomal protein L28
E2E33_009765	E2E33_009765, MBF8418584.1	MA-13_genebank.gb_genome (77415/14/1)	gene	Asp23/Gls24 family envelope stress response protein
E2E33_009770	E2E33_009770, MBF8418585.1	MA-13_genebank.gb_genome (77415/14/1)	gene	DAK2 domain-containing protein
E2E33_009775	4.3.1.17, E2E33_009775, MBF8418586.1, sdaAB	MA-13_genebank.gb_genome (77415/14/1)	gene	L-serine ammonia-lyase, iron-sulfur-dependent, subunit beta
E2E33_009780	4.3.1.17, E2E33_009780, MBF8418587.1, sdaAA	MA-13_genebank.gb_genome (77415/14/1)	gene	L-serine ammonia-lyase, iron-sulfur-dependent, subunit alpha
E2E33_009785	3.6.4.12, E2E33_009785, MBF8418588.1, recG	MA-13_genebank.gb_genome (77415/14/1)	gene	ATP-dependent DNA helicase RecG
E2E33_009790	E2E33_009790, MBF8418589.1, fapR	MA-13_genebank.gb_genome (77415/14/1)	gene	transcription factor FapR
E2E33_009795	E2E33_009795, MBF8418590.1, plsX	MA-13_genebank.gb_genome (77415/14/1)	gene	phosphate acyltransferase PlsX
E2E33_009800	2.3.1.39, E2E33_009800, MBF8418591.1, fabD	MA-13_genebank.gb_genome (77415/14/1)	gene	ACP S-malonyltransferase
E2E33_009805	1.1.1.100, E2E33_009805, MBF8418592.1, fabG	MA-13_genebank.gb_genome (77415/14/1)	gene	3-oxoacyl-[acyl-carrier-protein] reductase
E2E33_009810	E2E33_009810, MBF8418593.1, acpP	MA-13_genebank.gb_genome (77415/14/1)	gene	acyl carrier protein
E2E33_009815	3.1.26.3, E2E33_009815, MBF8418594.1	MA-13_genebank.gb_genome (77415/14/1)	gene	ribonuclease III
E2E33_009820	E2E33_009820, MBF8418595.1, smc	MA-13_genebank.gb_genome (77415/14/1)	gene	chromosome segregation protein SMC
E2E33_009825	E2E33_009825, MBF8418596.1, ftsY	MA-13_genebank.gb_genome (77415/14/1)	gene	signal recognition particle-docking protein FtsY
E2E33_009830	E2E33_009830, MBF8418597.1	MA-13_genebank.gb_genome (77415/14/1)	gene	putative DNA-binding protein
E2E33_009835	E2E33_009835, MBF8418598.1, ffh	MA-13_genebank.gb_genome (77415/14/1)	gene	signal recognition particle protein
E2E33_009840	E2E33_009840, MBF8418599.1, rpsP	MA-13_genebank.gb_genome (77415/14/1)	gene	30S ribosomal protein S16
E2E33_009845	E2E33_009845, MBF8418600.1	MA-13_genebank.gb_genome (77415/14/1)	gene	KH domain-containing protein
E2E33_009850	E2E33_009850, MBF8418601.1	MA-13_genebank.gb_genome (77415/14/1)	gene	YlqD family protein
E2E33_009855	E2E33_009855, MBF8418602.1, rimM	MA-13_genebank.gb_genome (77415/14/1)	gene	ribosome maturation factor RimM
E2E33_009860	2.1.1.228, E2E33_009860, MBF8418603.1, trmD	MA-13_genebank.gb_genome (77415/14/1)	gene	tRNA (guanosine(37)-N1)-methyltransferase TrmD
E2E33_009865	E2E33_009865, MBF8418604.1, rplS	MA-13_genebank.gb_genome (77415/14/1)	gene	50S ribosomal protein L19
E2E33_009870	3.4.21.89, E2E33_009870, MBF8418605.1, lepB	MA-13_genebank.gb_genome (77415/14/1)	gene	signal peptidase I
E2E33_009875	E2E33_009875, MBF8418606.1, ylqF	MA-13_genebank.gb_genome (77415/14/1)	gene	ribosome biogenesis GTPase YlqF
E2E33_009880	3.1.26.4, E2E33_009880, MBF8418607.1	MA-13_genebank.gb_genome (77415/14/1)	gene	ribonuclease HII
E2E33_009890	E2E33_009890, MBF8418609.1	MA-13_genebank.gb_genome (77415/14/1)	gene	EscU/YscU/HrcU family type III secretion system export apparatus switch protein
E2E33_009895	6.2.1.5, E2E33_009895, MBF8418610.1, sucC	MA-13_genebank.gb_genome (77415/14/1)	gene	ADP-forming succinate--CoA ligase subunit beta
E2E33_009900	6.2.1.5, E2E33_009900, MBF8418611.1, sucD	MA-13_genebank.gb_genome (77415/14/1)	gene	succinate--CoA ligase subunit alpha
E2E33_009905	E2E33_009905, MBF8418612.1, dprA	MA-13_genebank.gb_genome (77415/14/1)	gene	DNA-protecting protein DprA
E2E33_009915	E2E33_009915, MBF8418614.1, xerC	MA-13_genebank.gb_genome (77415/14/1)	gene	tyrosine recombinase XerC
E2E33_009920	3.4.25.2, E2E33_009920, MBF8418615.1, hslV	MA-13_genebank.gb_genome (77415/14/1)	gene	ATP-dependent protease subunit HslV
E2E33_009925	E2E33_009925, MBF8418616.1, hslU	MA-13_genebank.gb_genome (77415/14/1)	gene	HslU--HslV peptidase ATPase subunit
E2E33_009930	E2E33_009930, MBF8418617.1, codY	MA-13_genebank.gb_genome (77415/14/1)	gene	GTP-sensing pleiotropic transcriptional regulator CodY
E2E33_009935	E2E33_009935, MBF8418618.1, flgB	MA-13_genebank.gb_genome (77415/14/1)	gene	flagellar basal body rod protein FlgB
E2E33_009940	E2E33_009940, MBF8418619.1, flgC	MA-13_genebank.gb_genome (77415/14/1)	gene	flagellar basal body rod protein FlgC
E2E33_009945	E2E33_009945, MBF8418620.1, fliE	MA-13_genebank.gb_genome (77415/14/1)	gene	flagellar hook-basal body complex protein FliE
E2E33_009950	E2E33_009950, MBF8418621.1, fliF	MA-13_genebank.gb_genome (77415/14/1)	gene	flagellar M-ring protein FliF
E2E33_009955	E2E33_009955, MBF8418622.1, fliG	MA-13_genebank.gb_genome (77415/14/1)	gene	flagellar motor switch protein FliG
E2E33_009960	E2E33_009960, MBF8418623.1, fliH	MA-13_genebank.gb_genome (77415/14/1)	gene	flagellar assembly protein FliH
E2E33_009965	E2E33_009965, MBF8418624.1, fliI	MA-13_genebank.gb_genome (77415/14/1)	gene	flagellar protein export ATPase FliI
E2E33_009970	E2E33_009970, MBF8418625.1, fliJ	MA-13_genebank.gb_genome (77415/14/1)	gene	flagellar biosynthesis chaperone FliJ
E2E33_009975	E2E33_009975, MBF8418626.1	MA-13_genebank.gb_genome (77415/14/1)	gene	MgtE protein
E2E33_009980	E2E33_009980, MBF8418627.1	MA-13_genebank.gb_genome (77415/14/1)	gene	flagellar hook-length control protein FliK
E2E33_009985	E2E33_009985, MBF8418628.1, flgD	MA-13_genebank.gb_genome (77415/14/1)	gene	flagellar hook assembly protein FlgD
E2E33_009990	E2E33_009990, MBF8418629.1	MA-13_genebank.gb_genome (77415/14/1)	gene	flagellar operon protein
E2E33_009995	E2E33_009995, MBF8418630.1, flgG	MA-13_genebank.gb_genome (77415/14/1)	gene	flagellar basal body rod protein FlgG
E2E33_010000	E2E33_010000, MBF8418631.1	MA-13_genebank.gb_genome (77415/14/1)	gene	flagellar FlbD family protein
E2E33_010005	E2E33_010005, MBF8418632.1, fliL	MA-13_genebank.gb_genome (77415/14/1)	gene	flagellar basal body-associated protein FliL
E2E33_010010	E2E33_010010, MBF8418633.1, fliM	MA-13_genebank.gb_genome (77415/14/1)	gene	flagellar motor switch protein FliM
E2E33_010015	E2E33_010015, MBF8418634.1, fliY	MA-13_genebank.gb_genome (77415/14/1)	gene	flagellar motor switch phosphatase FliY
E2E33_010020	E2E33_010020, MBF8418635.1	MA-13_genebank.gb_genome (77415/14/1)	gene	response regulator
E2E33_010025	E2E33_010025, MBF8418636.1	MA-13_genebank.gb_genome (77415/14/1)	gene	flagellar biosynthetic protein FliO
E2E33_010030	E2E33_010030, MBF8418637.1, fliP	MA-13_genebank.gb_genome (77415/14/1)	gene	flagellar type III secretion system pore protein FliP
E2E33_010035	E2E33_010035, MBF8418638.1, fliQ	MA-13_genebank.gb_genome (77415/14/1)	gene	flagellar biosynthesis protein FliQ
E2E33_010040	E2E33_010040, MBF8418639.1, fliR	MA-13_genebank.gb_genome (77415/14/1)	gene	flagellar type III secretion system protein FliR
E2E33_010045	E2E33_010045, MBF8418640.1, flhB	MA-13_genebank.gb_genome (77415/14/1)	gene	flagellar biosynthesis protein FlhB
E2E33_010050	E2E33_010050, MBF8418641.1, flhA	MA-13_genebank.gb_genome (77415/14/1)	gene	flagellar biosynthesis protein FlhA
E2E33_010055	E2E33_010055, MBF8418642.1, flhF	MA-13_genebank.gb_genome (77415/14/1)	gene	flagellar biosynthesis protein FlhF
E2E33_010060	E2E33_010060, MBF8418643.1	MA-13_genebank.gb_genome (77415/14/1)	gene	MinD/ParA family protein
E2E33_010065	E2E33_010065, MBF8418644.1	MA-13_genebank.gb_genome (77415/14/1)	gene	chemotaxis protein CheB
E2E33_010070	E2E33_010070, MBF8418645.1	MA-13_genebank.gb_genome (77415/14/1)	gene	chemotaxis protein CheA
E2E33_010075	E2E33_010075, MBF8418646.1	MA-13_genebank.gb_genome (77415/14/1)	gene	chemotaxis protein CheW
E2E33_010080	E2E33_010080, MBF8418647.1	MA-13_genebank.gb_genome (77415/14/1)	gene	chemotaxis protein CheC
E2E33_010085	E2E33_010085, MBF8418648.1	MA-13_genebank.gb_genome (77415/14/1)	gene	chemotaxis protein CheD
E2E33_010090	E2E33_010090, MBF8418649.1	MA-13_genebank.gb_genome (77415/14/1)	gene	FliA/WhiG family RNA polymerase sigma factor
E2E33_010095	E2E33_010095, MBF8418650.1	MA-13_genebank.gb_genome (77415/14/1)	gene	hypothetical protein
E2E33_010100	E2E33_010100, MBF8418651.1, rpsB	MA-13_genebank.gb_genome (77415/14/1)	gene	30S ribosomal protein S2
E2E33_010105	E2E33_010105, MBF8418652.1	MA-13_genebank.gb_genome (77415/14/1)	gene	elongation factor Ts
E2E33_010110	2.7.4.22, E2E33_010110, MBF8418653.1	MA-13_genebank.gb_genome (77415/14/1)	gene	UMP kinase
E2E33_010115	E2E33_010115, MBF8418654.1, frr	MA-13_genebank.gb_genome (77415/14/1)	gene	ribosome recycling factor
E2E33_010120	E2E33_010120, MBF8418655.1	MA-13_genebank.gb_genome (77415/14/1)	gene	isoprenyl transferase
E2E33_010125	E2E33_010125, MBF8418656.1	MA-13_genebank.gb_genome (77415/14/1)	gene	phosphatidate cytidylyltransferase
E2E33_010130	1.1.1.267, E2E33_010130, MBF8418657.1	MA-13_genebank.gb_genome (77415/14/1)	gene	1-deoxy-D-xylulose-5-phosphate reductoisomerase
E2E33_010135	E2E33_010135, MBF8418658.1, rseP	MA-13_genebank.gb_genome (77415/14/1)	gene	RIP metalloprotease RseP
E2E33_010140	6.1.1.15, E2E33_010140, MBF8418659.1	MA-13_genebank.gb_genome (77415/14/1)	gene	proline--tRNA ligase
E2E33_010145	2.7.7.7, E2E33_010145, MBF8418660.1	MA-13_genebank.gb_genome (77415/14/1)	gene	PolC-type DNA polymerase III
E2E33_010150	E2E33_010150, MBF8418661.1, rimP	MA-13_genebank.gb_genome (77415/14/1)	gene	ribosome maturation factor RimP
E2E33_010155	E2E33_010155, MBF8418662.1, nusA	MA-13_genebank.gb_genome (77415/14/1)	gene	transcription termination/antitermination protein NusA
E2E33_010160	E2E33_010160, MBF8418663.1	MA-13_genebank.gb_genome (77415/14/1)	gene	YlxR family protein
E2E33_010165	E2E33_010165, MBF8418664.1	MA-13_genebank.gb_genome (77415/14/1)	gene	YlxQ family RNA-binding protein
E2E33_010175	E2E33_010175, MBF8418666.1	MA-13_genebank.gb_genome (77415/14/1)	gene	DUF503 family protein
E2E33_010180	E2E33_010180, MBF8418667.1, rbfA	MA-13_genebank.gb_genome (77415/14/1)	gene	30S ribosome-binding factor RbfA
E2E33_010185	E2E33_010185, MBF8418668.1, truB	MA-13_genebank.gb_genome (77415/14/1)	gene	tRNA pseudouridine(55) synthase TruB
E2E33_010190	2.7.1.26, 2.7.7.2, E2E33_010190, MBF8418669.1, ribF	MA-13_genebank.gb_genome (77415/14/1)	gene	bifunctional riboflavin kinase/FAD synthetase
E2E33_010195	E2E33_010195, MBF8418670.1, rpsO	MA-13_genebank.gb_genome (77415/14/1)	gene	30S ribosomal protein S15
E2E33_010200	2.7.7.8, E2E33_010200, MBF8418671.1, pnp	MA-13_genebank.gb_genome (77415/14/1)	gene	polyribonucleotide nucleotidyltransferase
E2E33_010205	E2E33_010205, MBF8418672.1	MA-13_genebank.gb_genome (77415/14/1)	gene	polysaccharide deacetylase family protein
E2E33_010210	E2E33_010210, MBF8418673.1	MA-13_genebank.gb_genome (77415/14/1)	gene	insulinase family protein
E2E33_010215	E2E33_010215, MBF8418674.1	MA-13_genebank.gb_genome (77415/14/1)	gene	YlmC/YmxH family sporulation protein
E2E33_010220	E2E33_010220, MBF8418675.1, dpaA	MA-13_genebank.gb_genome (77415/14/1)	gene	dipicolinic acid synthetase subunit A
E2E33_010225	E2E33_010225, MBF8418676.1	MA-13_genebank.gb_genome (77415/14/1)	gene	dipicolinate synthase subunit B
E2E33_010240	4.3.3.7, E2E33_010240, MBF8418679.1, dapA	MA-13_genebank.gb_genome (77415/14/1)	gene	4-hydroxy-tetrahydrodipicolinate synthase
E2E33_010245	E2E33_010245, MBF8418680.1	MA-13_genebank.gb_genome (77415/14/1)	gene	ribonuclease J
E2E33_010250	E2E33_010250, MBF8418681.1	MA-13_genebank.gb_genome (77415/14/1)	gene	ClpP family protease
E2E33_010255	E2E33_010255, MBF8418682.1	MA-13_genebank.gb_genome (77415/14/1)	gene	YlzJ-like family protein
E2E33_010260	E2E33_010260, MBF8418683.1	MA-13_genebank.gb_genome (77415/14/1)	gene	DNA translocase FtsK
E2E33_010270	E2E33_010270, MBF8418684.1	MA-13_genebank.gb_genome (77415/14/1)	gene	insulinase family protein
E2E33_010275	E2E33_010275, MBF8418685.1	MA-13_genebank.gb_genome (77415/14/1)	gene	insulinase family protein
E2E33_010280	E2E33_010280, MBF8418686.1	MA-13_genebank.gb_genome (77415/14/1)	gene	SDR family oxidoreductase
E2E33_010285	E2E33_010285, MBF8418687.1	MA-13_genebank.gb_genome (77415/14/1)	gene	DUF3243 domain-containing protein
E2E33_010290	E2E33_010290, MBF8418688.1	MA-13_genebank.gb_genome (77415/14/1)	gene	DUF3388 domain-containing protein
E2E33_010295	E2E33_010295, MBF8418689.1	MA-13_genebank.gb_genome (77415/14/1)	gene	helix-turn-helix domain-containing protein
E2E33_010300	2.7.8.5, E2E33_010300, MBF8418690.1, pgsA	MA-13_genebank.gb_genome (77415/14/1)	gene	CDP-diacylglycerol--glycerol-3-phosphate 3-phosphatidyltransferase
E2E33_010305	E2E33_010305, MBF8418691.1	MA-13_genebank.gb_genome (77415/14/1)	gene	competence/damage-inducible protein A
E2E33_010310	E2E33_010310, MBF8418692.1, recA	MA-13_genebank.gb_genome (77415/14/1)	gene	recombinase RecA
E2E33_010315	E2E33_010315, MBF8418693.1, rny	MA-13_genebank.gb_genome (77415/14/1)	gene	ribonuclease Y
E2E33_010320	E2E33_010320, MBF8418694.1	MA-13_genebank.gb_genome (77415/14/1)	gene	TIGR00282 family metallophosphoesterase
E2E33_010325	E2E33_010325, MBF8418695.1, spoVS	MA-13_genebank.gb_genome (77415/14/1)	gene	stage V sporulation protein SpoVS
E2E33_010330	E2E33_010330, MBF8418696.1	MA-13_genebank.gb_genome (77415/14/1)	gene	U32 family peptidase
E2E33_010335	E2E33_010335, MBF8418697.1	MA-13_genebank.gb_genome (77415/14/1)	gene	U32 family peptidase
E2E33_010350	E2E33_010350, MBF8418698.1, miaB	MA-13_genebank.gb_genome (77415/14/1)	gene	tRNA (N6-isopentenyl adenosine(37)-C2)-methylthiotransferase MiaB
E2E33_010355	E2E33_010355, MBF8418699.1	MA-13_genebank.gb_genome (77415/14/1)	gene	RicAFT regulatory complex protein RicA family protein
E2E33_010360	E2E33_010360, MBF8418700.1	MA-13_genebank.gb_genome (77415/14/1)	gene	outer spore coat protein CotE
E2E33_010365	E2E33_010365, MBF8418701.1, mutS	MA-13_genebank.gb_genome (77415/14/1)	gene	DNA mismatch repair protein MutS
E2E33_010370	E2E33_010370, MBF8418702.1, mutL	MA-13_genebank.gb_genome (77415/14/1)	gene	DNA mismatch repair endonuclease MutL
E2E33_010375	E2E33_010375, MBF8418703.1	MA-13_genebank.gb_genome (77415/14/1)	gene	hypothetical protein
E2E33_010415	E2E33_010415, MBF8418708.1	MA-13_genebank.gb_genome (77415/14/1)	gene	FAD-binding oxidoreductase
E2E33_010420	E2E33_010420, MBF8418709.1	MA-13_genebank.gb_genome (77415/14/1)	gene	class I SAM-dependent methyltransferase
E2E33_010425	E2E33_010425, MBF8418710.1	MA-13_genebank.gb_genome (77415/14/1)	gene	ECF transporter S component
E2E33_010430	E2E33_010430, MBF8418711.1	MA-13_genebank.gb_genome (77415/14/1)	gene	DUF4430 domain-containing protein
E2E33_010440	E2E33_010440, MBF8418713.1, htpG	MA-13_genebank.gb_genome (77415/14/1)	gene	molecular chaperone HtpG
E2E33_010445	E2E33_010445, MBF8418714.1	MA-13_genebank.gb_genome (77415/14/1)	gene	M20 family metallopeptidase
E2E33_010450	E2E33_010450, MBF8418715.1	MA-13_genebank.gb_genome (77415/14/1)	gene	transporter substrate-binding domain-containing protein
E2E33_010455	E2E33_010455, MBF8418716.1	MA-13_genebank.gb_genome (77415/14/1)	gene	amino acid ABC transporter permease
E2E33_010460	E2E33_010460, MBF8418717.1	MA-13_genebank.gb_genome (77415/14/1)	gene	amino acid ABC transporter ATP-binding protein
E2E33_010465	E2E33_010465, MBF8418718.1	MA-13_genebank.gb_genome (77415/14/1)	gene	OsmC family protein
E2E33_010470	E2E33_010470, MBF8418719.1	MA-13_genebank.gb_genome (77415/14/1)	gene	MFS transporter
E2E33_010475	3.5.2.9, E2E33_010475, MBF8418720.1, pxpB	MA-13_genebank.gb_genome (77415/14/1)	gene	5-oxoprolinase subunit PxpB
E2E33_010480	E2E33_010480, MBF8418721.1	MA-13_genebank.gb_genome (77415/14/1)	gene	biotin-dependent carboxyltransferase family protein
E2E33_010485	E2E33_010485, MBF8418722.1	MA-13_genebank.gb_genome (77415/14/1)	gene	LamB/YcsF family protein
E2E33_010490	E2E33_010490, MBF8418723.1	MA-13_genebank.gb_genome (77415/14/1)	gene	DUF969 domain-containing protein
E2E33_010495	E2E33_010495, MBF8418724.1	MA-13_genebank.gb_genome (77415/14/1)	gene	DUF979 domain-containing protein
E2E33_010500	3.4.19.3, E2E33_010500, MBF8418725.1, pcp	MA-13_genebank.gb_genome (77415/14/1)	gene	pyroglutamyl-peptidase I
E2E33_010505	E2E33_010505, MBF8418726.1	MA-13_genebank.gb_genome (77415/14/1)	gene	NCS2 family permease
E2E33_010510	E2E33_010510, MBF8418727.1	MA-13_genebank.gb_genome (77415/14/1)	gene	NupC/NupG family nucleoside CNT transporter
E2E33_010515	2.4.2.1, E2E33_010515, MBF8418728.1, deoD	MA-13_genebank.gb_genome (77415/14/1)	gene	purine-nucleoside phosphorylase
E2E33_010525	5.4.2.7, E2E33_010525, MBF8418729.1	MA-13_genebank.gb_genome (77415/14/1)	gene	phosphopentomutase
E2E33_010530	2.4.2.2, E2E33_010530, MBF8418730.1	MA-13_genebank.gb_genome (77415/14/1)	gene	pyrimidine-nucleoside phosphorylase
E2E33_010535	4.1.2.4, E2E33_010535, MBF8418731.1, deoC	MA-13_genebank.gb_genome (77415/14/1)	gene	deoxyribose-phosphate aldolase
E2E33_010540	3.5.4.5, E2E33_010540, MBF8418732.1	MA-13_genebank.gb_genome (77415/14/1)	gene	cytidine deaminase
E2E33_010545	2.1.1.14, E2E33_010545, MBF8418733.1, metE	MA-13_genebank.gb_genome (77415/14/1)	gene	5-methyltetrahydropteroyltriglutamate-- homocysteine S-methyltransferase
E2E33_010550	1.7.1.7, E2E33_010550, MBF8418734.1, guaC	MA-13_genebank.gb_genome (77415/14/1)	gene	GMP reductase
E2E33_010575	E2E33_010575, MBF8418736.1	MA-13_genebank.gb_genome (77415/14/1)	gene	bifunctional GNAT family N-acetyltransferase/carbon-nitrogen hydrolase family protein
E2E33_010585	E2E33_010585, MBF8418737.1	MA-13_genebank.gb_genome (77415/14/1)	gene	tellurium resistance protein TerC
E2E33_010645	E2E33_010645, MBF8418748.1	MA-13_genebank.gb_genome (77415/14/1)	gene	CoA transferase
E2E33_010650	E2E33_010650, MBF8418749.1	MA-13_genebank.gb_genome (77415/14/1)	gene	NADP-dependent oxidoreductase
E2E33_010655	E2E33_010655, MBF8418750.1	MA-13_genebank.gb_genome (77415/14/1)	gene	MFS transporter
E2E33_010710	E2E33_010710, MBF8418756.1	MA-13_genebank.gb_genome (77415/14/1)	gene	ABC transporter permease
E2E33_010715	E2E33_010715, MBF8418757.1	MA-13_genebank.gb_genome (77415/14/1)	gene	osmoprotectant ABC transporter substrate-binding protein
E2E33_010720	E2E33_010720, MBF8418758.1	MA-13_genebank.gb_genome (77415/14/1)	gene	ABC transporter permease
E2E33_010725	E2E33_010725, MBF8418759.1	MA-13_genebank.gb_genome (77415/14/1)	gene	betaine/proline/choline family ABC transporter ATP-binding protein
E2E33_010730	E2E33_010730, MBF8418760.1	MA-13_genebank.gb_genome (77415/14/1)	gene	GbsR/MarR family transcriptional regulator
E2E33_010745	E2E33_010745, MBF8418762.1	MA-13_genebank.gb_genome (77415/14/1)	gene	hypothetical protein
E2E33_010750	E2E33_010750, MBF8418763.1	MA-13_genebank.gb_genome (77415/14/1)	gene	cupin domain-containing protein
E2E33_010755	E2E33_010755, MBF8418764.1	MA-13_genebank.gb_genome (77415/14/1)	gene	SGNH/GDSL hydrolase family protein
E2E33_010785	E2E33_010785, MBF8418768.1	MA-13_genebank.gb_genome (77415/14/1)	gene	iron-containing alcohol dehydrogenase family protein
E2E33_010790	E2E33_010790, MBF8418769.1, nadA	MA-13_genebank.gb_genome (77415/14/1)	gene	quinolinate synthase NadA
E2E33_010795	E2E33_010795, MBF8418770.1, nadC	MA-13_genebank.gb_genome (77415/14/1)	gene	carboxylating nicotinate-nucleotide diphosphorylase
E2E33_010800	1.4.3.16, E2E33_010800, MBF8418771.1, nadB	MA-13_genebank.gb_genome (77415/14/1)	gene	L-aspartate oxidase
E2E33_010805	E2E33_010805, MBF8418772.1	MA-13_genebank.gb_genome (77415/14/1)	gene	IscS subfamily cysteine desulfurase
E2E33_010810	E2E33_010810, MBF8418773.1	MA-13_genebank.gb_genome (77415/14/1)	gene	NYN domain-containing protein
E2E33_010820	E2E33_010820, MBF8418775.1	MA-13_genebank.gb_genome (77415/14/1)	gene	energy-coupling factor transporter transmembrane protein EcfT
E2E33_010825	E2E33_010825, MBF8418776.1	MA-13_genebank.gb_genome (77415/14/1)	gene	energy-coupling factor ABC transporter ATP-binding protein
E2E33_010835	E2E33_010835, MBF8418778.1	MA-13_genebank.gb_genome (77415/14/1)	gene	S-adenosyl-l-methionine hydroxide adenosyltransferase family protein
E2E33_010875	E2E33_010875, MBF8418785.1	MA-13_genebank.gb_genome (77415/14/1)	gene	MBL fold metallo-hydrolase
E2E33_010895	E2E33_010895, MBF8418788.1	MA-13_genebank.gb_genome (77415/14/1)	gene	M42 family metallopeptidase
E2E33_010920	E2E33_010920, MBF8418792.1	MA-13_genebank.gb_genome (77415/14/1)	gene	FadR family transcriptional regulator
E2E33_010925	E2E33_010925, MBF8418793.1	MA-13_genebank.gb_genome (77415/14/1)	gene	PLP-dependent aminotransferase family protein
E2E33_010930	E2E33_010930, MBF8418794.1	MA-13_genebank.gb_genome (77415/14/1)	gene	hypothetical protein
E2E33_010940	E2E33_010940, MBF8418796.1	MA-13_genebank.gb_genome (77415/14/1)	gene	MFS transporter
E2E33_010950	E2E33_010950, MBF8418798.1	MA-13_genebank.gb_genome (77415/14/1)	gene	DUF2922 domain-containing protein
E2E33_010955	E2E33_010955, MBF8418799.1	MA-13_genebank.gb_genome (77415/14/1)	gene	DUF1659 domain-containing protein
E2E33_010960	E2E33_010960, MBF8418800.1	MA-13_genebank.gb_genome (77415/14/1)	gene	hypothetical protein
E2E33_010965	E2E33_010965, MBF8418801.1	MA-13_genebank.gb_genome (77415/14/1)	gene	YndM family protein
E2E33_010985	E2E33_010985, MBF8418803.1	MA-13_genebank.gb_genome (77415/14/1)	gene	PadR family transcriptional regulator
E2E33_010990	E2E33_010990, MBF8418804.1	MA-13_genebank.gb_genome (77415/14/1)	gene	hypothetical protein
E2E33_010995	E2E33_010995, MBF8418805.1, queC	MA-13_genebank.gb_genome (77415/14/1)	gene	7-cyano-7-deazaguanine synthase QueC
E2E33_011000	1.1.1.169, E2E33_011000, MBF8418806.1	MA-13_genebank.gb_genome (77415/14/1)	gene	2-dehydropantoate 2-reductase
E2E33_011005	E2E33_011005, MBF8418807.1	MA-13_genebank.gb_genome (77415/14/1)	gene	NAD(P)H-dependent oxidoreductase
E2E33_011020	E2E33_011020, MBF8418810.1	MA-13_genebank.gb_genome (77415/14/1)	gene	lactoylglutathione lyase family protein
E2E33_011030	3.6.1.23, E2E33_011030, MBF8418812.1, dut	MA-13_genebank.gb_genome (77415/14/1)	gene	dUTP diphosphatase
E2E33_011060	E2E33_011060, MBF8418816.1	MA-13_genebank.gb_genome (77415/14/1)	gene	LLM class flavin-dependent oxidoreductase
E2E33_011160	E2E33_011160, MBF8418819.1	MA-13_genebank.gb_genome (77415/14/1)	gene	pro-sigmaK processing inhibitor BofA family protein
E2E33_011165	E2E33_011165, MBF8418820.1	MA-13_genebank.gb_genome (77415/14/1)	gene	YaaL family protein
E2E33_011170	E2E33_011170, MBF8418821.1, recR	MA-13_genebank.gb_genome (77415/14/1)	gene	recombination protein RecR
E2E33_011175	E2E33_011175, MBF8418822.1	MA-13_genebank.gb_genome (77415/14/1)	gene	YbaB/EbfC family nucleoid-associated protein
E2E33_011180	2.7.7.7, E2E33_011180, MBF8418823.1, dnaX	MA-13_genebank.gb_genome (77415/14/1)	gene	DNA polymerase III subunit gamma/tau
E2E33_011190	E2E33_011190, MBF8418824.1	MA-13_genebank.gb_genome (77415/14/1)	gene	nucleoside deaminase
E2E33_011205	E2E33_011205, MBF8418827.1	MA-13_genebank.gb_genome (77415/14/1)	gene	deoxynucleoside kinase
E2E33_011225	E2E33_011225, MBF8418830.1, spoVAE	MA-13_genebank.gb_genome (77415/14/1)	gene	stage V sporulation protein AE
E2E33_011235	E2E33_011235, MBF8418832.1, spoVAC	MA-13_genebank.gb_genome (77415/14/1)	gene	stage V sporulation protein AC
E2E33_011240	E2E33_011240, MBF8418833.1	MA-13_genebank.gb_genome (77415/14/1)	gene	sporulation protein
E2E33_011245	E2E33_011245, MBF8418834.1	MA-13_genebank.gb_genome (77415/14/1)	gene	DUF1360 domain-containing protein
E2E33_011250	E2E33_011250, MBF8418835.1	MA-13_genebank.gb_genome (77415/14/1)	gene	spore coat protein Z
E2E33_011255	E2E33_011255, MBF8418836.1	MA-13_genebank.gb_genome (77415/14/1)	gene	hypothetical protein
E2E33_011260	E2E33_011260, MBF8418837.1	MA-13_genebank.gb_genome (77415/14/1)	gene	hypothetical protein
E2E33_011265	1.3.1.-, E2E33_011265, MBF8418838.1, fabI	MA-13_genebank.gb_genome (77415/14/1)	gene	enoyl-ACP reductase FabI
E2E33_011270	E2E33_011270, MBF8418839.1, prpE	MA-13_genebank.gb_genome (77415/14/1)	gene	bis(5'-nucleosyl)-tetraphosphatase PrpE
E2E33_011275	E2E33_011275, MBF8418840.1	MA-13_genebank.gb_genome (77415/14/1)	gene	RluA family pseudouridine synthase
E2E33_011280	2.7.1.23, E2E33_011280, MBF8418841.1	MA-13_genebank.gb_genome (77415/14/1)	gene	NAD kinase
E2E33_011285	E2E33_011285, MBF8418842.1	MA-13_genebank.gb_genome (77415/14/1)	gene	GTP pyrophosphokinase family protein
E2E33_011290	E2E33_011290, MBF8418843.1	MA-13_genebank.gb_genome (77415/14/1)	gene	hypothetical protein
E2E33_011295	E2E33_011295, MBF8418844.1	MA-13_genebank.gb_genome (77415/14/1)	gene	CYTH domain-containing protein
E2E33_011300	E2E33_011300, MBF8418845.1	MA-13_genebank.gb_genome (77415/14/1)	gene	lytic transglycosylase domain-containing protein
E2E33_011305	E2E33_011305, MBF8418846.1	MA-13_genebank.gb_genome (77415/14/1)	gene	globin
E2E33_011310	E2E33_011310, MBF8418847.1	MA-13_genebank.gb_genome (77415/14/1)	gene	DsbA family protein
E2E33_011325	E2E33_011325, MBF8418850.1	MA-13_genebank.gb_genome (77415/14/1)	gene	competence protein CoiA
E2E33_011330	E2E33_011330, MBF8418851.1, mecA	MA-13_genebank.gb_genome (77415/14/1)	gene	adaptor protein MecA
E2E33_011335	E2E33_011335, MBF8418852.1, spxA	MA-13_genebank.gb_genome (77415/14/1)	gene	transcriptional regulator Spx
E2E33_011340	E2E33_011340, MBF8418853.1	MA-13_genebank.gb_genome (77415/14/1)	gene	ATP-binding cassette domain-containing protein
E2E33_011345	E2E33_011345, MBF8418854.1	MA-13_genebank.gb_genome (77415/14/1)	gene	ABC transporter ATP-binding protein
E2E33_011350	E2E33_011350, MBF8418855.1	MA-13_genebank.gb_genome (77415/14/1)	gene	ABC transporter permease
E2E33_011355	E2E33_011355, MBF8418856.1	MA-13_genebank.gb_genome (77415/14/1)	gene	ABC transporter permease
E2E33_011360	E2E33_011360, MBF8418857.1	MA-13_genebank.gb_genome (77415/14/1)	gene	peptide ABC transporter substrate-binding protein
E2E33_011365	E2E33_011365, MBF8418858.1	MA-13_genebank.gb_genome (77415/14/1)	gene	DUF3899 domain-containing protein
E2E33_011370	6.1.1.2, E2E33_011370, MBF8418859.1, trpS	MA-13_genebank.gb_genome (77415/14/1)	gene	tryptophan--tRNA ligase
E2E33_011375	E2E33_011375, MBF8418860.1	MA-13_genebank.gb_genome (77415/14/1)	gene	YjbA family protein
E2E33_011380	E2E33_011380, MBF8418861.1	MA-13_genebank.gb_genome (77415/14/1)	gene	oligopeptide ABC transporter substrate-binding protein
E2E33_011385	E2E33_011385, MBF8418862.1	MA-13_genebank.gb_genome (77415/14/1)	gene	ABC transporter permease
E2E33_011390	E2E33_011390, MBF8418863.1	MA-13_genebank.gb_genome (77415/14/1)	gene	ABC transporter permease
E2E33_011400	E2E33_011400, MBF8418865.1	MA-13_genebank.gb_genome (77415/14/1)	gene	ABC transporter ATP-binding protein
E2E33_011405	E2E33_011405, MBF8418866.1	MA-13_genebank.gb_genome (77415/14/1)	gene	hypothetical protein
E2E33_011410	2.3.1.179, E2E33_011410, MBF8418867.1, fabF	MA-13_genebank.gb_genome (77415/14/1)	gene	beta-ketoacyl-ACP synthase II
E2E33_011415	E2E33_011415, MBF8418868.1	MA-13_genebank.gb_genome (77415/14/1)	gene	ketoacyl-ACP synthase III
E2E33_011420	E2E33_011420, MBF8418869.1	MA-13_genebank.gb_genome (77415/14/1)	gene	hypothetical protein
E2E33_011425	E2E33_011425, MBF8418870.1	MA-13_genebank.gb_genome (77415/14/1)	gene	NADP-binding protein
E2E33_011430	E2E33_011430, MBF8418871.1	MA-13_genebank.gb_genome (77415/14/1)	gene	YjzD family protein
E2E33_011435	E2E33_011435, MBF8418872.1, clpB	MA-13_genebank.gb_genome (77415/14/1)	gene	ATP-dependent chaperone ClpB
E2E33_011440	E2E33_011440, MBF8418873.1	MA-13_genebank.gb_genome (77415/14/1)	gene	YjzC family protein
E2E33_011445	E2E33_011445, MBF8418874.1	MA-13_genebank.gb_genome (77415/14/1)	gene	metal-sulfur cluster assembly factor
E2E33_011475	E2E33_011475, MBF8418879.1	MA-13_genebank.gb_genome (77415/14/1)	gene	DUF3813 domain-containing protein
E2E33_011480	E2E33_011480, MBF8418880.1	MA-13_genebank.gb_genome (77415/14/1)	gene	DegV family protein
E2E33_011490	E2E33_011490, MBF8418881.1	MA-13_genebank.gb_genome (77415/14/1)	gene	DUF2777 domain-containing protein
E2E33_011495	E2E33_011495, MBF8418882.1	MA-13_genebank.gb_genome (77415/14/1)	gene	YisL family protein
E2E33_011500	E2E33_011500, MBF8418883.1	MA-13_genebank.gb_genome (77415/14/1)	gene	fumarylacetoacetate hydrolase family protein
E2E33_011560	E2E33_011560, MBF8418892.1, modA	MA-13_genebank.gb_genome (77415/14/1)	gene	molybdate ABC transporter substrate-binding protein
E2E33_011575	E2E33_011575, MBF8418895.1, moaA	MA-13_genebank.gb_genome (77415/14/1)	gene	GTP 3',8-cyclase MoaA
E2E33_011580	E2E33_011580, MBF8418896.1	MA-13_genebank.gb_genome (77415/14/1)	gene	molybdenum cofactor biosynthesis protein MoaB
E2E33_011585	E2E33_011585, MBF8418897.1	MA-13_genebank.gb_genome (77415/14/1)	gene	molybdenum cofactor guanylyltransferase
E2E33_011590	E2E33_011590, MBF8418898.1	MA-13_genebank.gb_genome (77415/14/1)	gene	molybdopterin molybdotransferase MoeA
E2E33_011600	E2E33_011600, MBF8418900.1	MA-13_genebank.gb_genome (77415/14/1)	gene	molybdenum cofactor biosynthesis protein MoaE
E2E33_011605	E2E33_011605, MBF8418901.1, moaD	MA-13_genebank.gb_genome (77415/14/1)	gene	molybdopterin converting factor subunit 1
E2E33_011615	E2E33_011615, MBF8418903.1	MA-13_genebank.gb_genome (77415/14/1)	gene	ThiF family adenylyltransferase
E2E33_011620	E2E33_011620, MBF8418904.1	MA-13_genebank.gb_genome (77415/14/1)	gene	DUF1641 domain-containing protein
E2E33_011625	E2E33_011625, MBF8418905.1, fdhF	MA-13_genebank.gb_genome (77415/14/1)	gene	formate dehydrogenase subunit alpha
E2E33_011630	E2E33_011630, MBF8418906.1, fdhD	MA-13_genebank.gb_genome (77415/14/1)	gene	formate dehydrogenase accessory sulfurtransferase FdhD
E2E33_011635	6.1.1.1, E2E33_011635, MBF8418907.1	MA-13_genebank.gb_genome (77415/14/1)	gene	tyrosine--tRNA ligase
E2E33_011640	E2E33_011640, MBF8418908.1	MA-13_genebank.gb_genome (77415/14/1)	gene	sigma-54-dependent Fis family transcriptional regulator
E2E33_011645	1.2.1.88, E2E33_011645, MBF8418909.1, pruA	MA-13_genebank.gb_genome (77415/14/1)	gene	L-glutamate gamma-semialdehyde dehydrogenase
E2E33_011650	E2E33_011650, MBF8418910.1	MA-13_genebank.gb_genome (77415/14/1)	gene	proline dehydrogenase family protein
E2E33_011910	E2E33_011910, MBF8418962.1, rpsD	MA-13_genebank.gb_genome (77415/14/1)	gene	30S ribosomal protein S4
E2E33_011915	E2E33_011915, MBF8418963.1	MA-13_genebank.gb_genome (77415/14/1)	gene	diguanylate cyclase
E2E33_011920	E2E33_011920, MBF8418964.1	MA-13_genebank.gb_genome (77415/14/1)	gene	GAF domain-containing protein
E2E33_011925	E2E33_011925, MBF8418965.1, refZ	MA-13_genebank.gb_genome (77415/14/1)	gene	forespore capture DNA-binding protein RefZ
E2E33_011930	E2E33_011930, MBF8418966.1, ezrA	MA-13_genebank.gb_genome (77415/14/1)	gene	septation ring formation regulator EzrA
E2E33_011935	E2E33_011935, MBF8418967.1	MA-13_genebank.gb_genome (77415/14/1)	gene	cysteine desulfurase
E2E33_011940	E2E33_011940, MBF8418968.1, thiI	MA-13_genebank.gb_genome (77415/14/1)	gene	tRNA 4-thiouridine(8) synthase ThiI
E2E33_011945	E2E33_011945, MBF8418969.1	MA-13_genebank.gb_genome (77415/14/1)	gene	alpha/beta-type small acid-soluble spore protein
E2E33_011950	E2E33_011950, MBF8418970.1	MA-13_genebank.gb_genome (77415/14/1)	gene	acyl--CoA ligase
E2E33_011955	E2E33_011955, MBF8418971.1, sppA	MA-13_genebank.gb_genome (77415/14/1)	gene	signal peptide peptidase SppA
E2E33_011960	E2E33_011960, MBF8418972.1	MA-13_genebank.gb_genome (77415/14/1)	gene	RDD family protein
E2E33_011965	E2E33_011965, MBF8418973.1	MA-13_genebank.gb_genome (77415/14/1)	gene	DUF2953 domain-containing protein
E2E33_011970	E2E33_011970, MBF8418974.1, ytfJ	MA-13_genebank.gb_genome (77415/14/1)	gene	GerW family sporulation protein
E2E33_011975	1.11.1.-, E2E33_011975, MBF8418975.1, tpx	MA-13_genebank.gb_genome (77415/14/1)	gene	thiol peroxidase
E2E33_011980	E2E33_011980, MBF8418976.1	MA-13_genebank.gb_genome (77415/14/1)	gene	class I SAM-dependent methyltransferase
E2E33_011985	E2E33_011985, MBF8418977.1	MA-13_genebank.gb_genome (77415/14/1)	gene	acetate kinase
E2E33_011990	E2E33_011990, MBF8418978.1	MA-13_genebank.gb_genome (77415/14/1)	gene	EcsC family protein
E2E33_011995	E2E33_011995, MBF8418979.1	MA-13_genebank.gb_genome (77415/14/1)	gene	universal stress protein
E2E33_012005	1.4.1.1, E2E33_012005, MBF8418981.1, ald	MA-13_genebank.gb_genome (77415/14/1)	gene	alanine dehydrogenase
E2E33_012010	E2E33_012010, MBF8418982.1	MA-13_genebank.gb_genome (77415/14/1)	gene	aminopeptidase P family protein
E2E33_012015	E2E33_012015, MBF8418983.1	MA-13_genebank.gb_genome (77415/14/1)	gene	metal-dependent hydrolase
E2E33_012020	E2E33_012020, MBF8418984.1	MA-13_genebank.gb_genome (77415/14/1)	gene	CBS domain-containing protein
E2E33_012025	E2E33_012025, MBF8418985.1	MA-13_genebank.gb_genome (77415/14/1)	gene	YtpI family protein
E2E33_012030	E2E33_012030, MBF8418986.1	MA-13_genebank.gb_genome (77415/14/1)	gene	bifunctional oligoribonuclease/PAP phosphatase NrnA
E2E33_012035	E2E33_012035, MBF8418987.1	MA-13_genebank.gb_genome (77415/14/1)	gene	sporulation protein
E2E33_012040	E2E33_012040, MBF8418988.1	MA-13_genebank.gb_genome (77415/14/1)	gene	YtrH family sporulation protein
E2E33_012050	E2E33_012050, MBF8418990.1	MA-13_genebank.gb_genome (77415/14/1)	gene	NAD-dependent malic enzyme
E2E33_012060	E2E33_012060, MBF8418992.1, accA	MA-13_genebank.gb_genome (77415/14/1)	gene	acetyl-CoA carboxylase carboxyl transferase subunit alpha
E2E33_012065	2.7.1.11, E2E33_012065, MBF8418993.1, pfkA	MA-13_genebank.gb_genome (77415/14/1)	gene	6-phosphofructokinase
E2E33_012070	2.7.1.40, E2E33_012070, MBF8418994.1, pyk	MA-13_genebank.gb_genome (77415/14/1)	gene	pyruvate kinase
E2E33_012075	E2E33_012075, MBF8418995.1, ytvI	MA-13_genebank.gb_genome (77415/14/1)	gene	sporulation integral membrane protein YtvI
E2E33_012080	E2E33_012080, MBF8418996.1	MA-13_genebank.gb_genome (77415/14/1)	gene	DUF441 domain-containing protein
E2E33_012085	2.3.3.1, E2E33_012085, MBF8418997.1, citZ	MA-13_genebank.gb_genome (77415/14/1)	gene	citrate synthase
E2E33_012090	E2E33_012090, MBF8418998.1, icd	MA-13_genebank.gb_genome (77415/14/1)	gene	NADP-dependent isocitrate dehydrogenase
E2E33_012095	1.1.1.37, E2E33_012095, MBF8418999.1, mdh	MA-13_genebank.gb_genome (77415/14/1)	gene	malate dehydrogenase
E2E33_012100	2.7.7.7, E2E33_012100, MBF8419000.1, polA	MA-13_genebank.gb_genome (77415/14/1)	gene	DNA polymerase I
E2E33_012105	3.2.2.23, E2E33_012105, MBF8419001.1, mutM	MA-13_genebank.gb_genome (77415/14/1)	gene	DNA-formamidopyrimidine glycosylase
E2E33_012110	E2E33_012110, MBF8419002.1, ytaF	MA-13_genebank.gb_genome (77415/14/1)	gene	sporulation membrane protein YtaF
E2E33_012115	2.7.1.24, E2E33_012115, MBF8419003.1	MA-13_genebank.gb_genome (77415/14/1)	gene	dephospho-CoA kinase
E2E33_012120	E2E33_012120, MBF8419004.1	MA-13_genebank.gb_genome (77415/14/1)	gene	glyceraldehyde-3-phosphate dehydrogenase
E2E33_012130	E2E33_012130, MBF8419006.1, nrdR	MA-13_genebank.gb_genome (77415/14/1)	gene	transcriptional regulator NrdR
E2E33_012135	E2E33_012135, MBF8419007.1	MA-13_genebank.gb_genome (77415/14/1)	gene	replication initiation and membrane attachment family protein
E2E33_012140	E2E33_012140, MBF8419008.1, dnaI	MA-13_genebank.gb_genome (77415/14/1)	gene	primosomal protein DnaI
E2E33_012145	E2E33_012145, MBF8419009.1	MA-13_genebank.gb_genome (77415/14/1)	gene	putative sporulation protein YtxC
E2E33_012150	6.1.1.3, E2E33_012150, MBF8419010.1, thrS	MA-13_genebank.gb_genome (77415/14/1)	gene	threonine--tRNA ligase
E2E33_012155	E2E33_012155, MBF8419011.1	MA-13_genebank.gb_genome (77415/14/1)	gene	diacylglycerol kinase family protein
E2E33_012160	E2E33_012160, MBF8419012.1, ybeY	MA-13_genebank.gb_genome (77415/14/1)	gene	rRNA maturation RNase YbeY
E2E33_012170	E2E33_012170, MBF8419014.1	MA-13_genebank.gb_genome (77415/14/1)	gene	PhoH family protein
E2E33_012175	E2E33_012175, MBF8419015.1, yqfD	MA-13_genebank.gb_genome (77415/14/1)	gene	sporulation protein YqfD
E2E33_012180	E2E33_012180, MBF8419016.1, yqfC	MA-13_genebank.gb_genome (77415/14/1)	gene	sporulation protein YqfC
E2E33_012185	E2E33_012185, MBF8419017.1	MA-13_genebank.gb_genome (77415/14/1)	gene	GatB/YqeY domain-containing protein
E2E33_012190	E2E33_012190, MBF8419018.1	MA-13_genebank.gb_genome (77415/14/1)	gene	30S ribosomal protein S21
E2E33_012195	E2E33_012195, MBF8419019.1	MA-13_genebank.gb_genome (77415/14/1)	gene	acylphosphatase
E2E33_012200	E2E33_012200, MBF8419020.1	MA-13_genebank.gb_genome (77415/14/1)	gene	Na/Pi cotransporter family protein
E2E33_012205	E2E33_012205, MBF8419021.1, mtaB	MA-13_genebank.gb_genome (77415/14/1)	gene	tRNA (N(6)-L-threonylcarbamoyladenosine(37)-C(2))- methylthiotransferase MtaB
E2E33_012210	2.1.1.193, E2E33_012210, MBF8419022.1	MA-13_genebank.gb_genome (77415/14/1)	gene	16S rRNA (uracil(1498)-N(3))-methyltransferase
E2E33_012215	2.1.1.-, E2E33_012215, MBF8419023.1, prmA	MA-13_genebank.gb_genome (77415/14/1)	gene	50S ribosomal protein L11 methyltransferase
E2E33_012220	E2E33_012220, MBF8419024.1, dnaJ	MA-13_genebank.gb_genome (77415/14/1)	gene	molecular chaperone DnaJ
E2E33_012225	E2E33_012225, MBF8419025.1, dnaK	MA-13_genebank.gb_genome (77415/14/1)	gene	molecular chaperone DnaK
E2E33_012230	E2E33_012230, MBF8419026.1, grpE	MA-13_genebank.gb_genome (77415/14/1)	gene	nucleotide exchange factor GrpE
E2E33_012235	E2E33_012235, MBF8419027.1, hrcA	MA-13_genebank.gb_genome (77415/14/1)	gene	heat-inducible transcriptional repressor HrcA
E2E33_012240	E2E33_012240, MBF8419028.1	MA-13_genebank.gb_genome (77415/14/1)	gene	oxygen-independent coproporphyrinogen III oxidase
E2E33_012245	3.6.5.n1, E2E33_012245, MBF8419029.1, lepA	MA-13_genebank.gb_genome (77415/14/1)	gene	elongation factor 4
E2E33_012250	E2E33_012250, MBF8419030.1	MA-13_genebank.gb_genome (77415/14/1)	gene	stage II sporulation protein P
E2E33_012255	3.4.24.78, E2E33_012255, MBF8419031.1	MA-13_genebank.gb_genome (77415/14/1)	gene	GPR endopeptidase
E2E33_012260	E2E33_012260, MBF8419032.1, rpsT	MA-13_genebank.gb_genome (77415/14/1)	gene	30S ribosomal protein S20
E2E33_012265	2.7.7.7, E2E33_012265, MBF8419033.1, holA	MA-13_genebank.gb_genome (77415/14/1)	gene	DNA polymerase III subunit delta
E2E33_012275	E2E33_012275, MBF8419035.1	MA-13_genebank.gb_genome (77415/14/1)	gene	DNA internalization-related competence protein ComEC/Rec2
E2E33_012280	E2E33_012280, MBF8419036.1	MA-13_genebank.gb_genome (77415/14/1)	gene	ComE operon protein 2
E2E33_012285	E2E33_012285, MBF8419037.1	MA-13_genebank.gb_genome (77415/14/1)	gene	helix-hairpin-helix domain-containing protein
E2E33_012290	E2E33_012290, MBF8419038.1	MA-13_genebank.gb_genome (77415/14/1)	gene	late competence protein ComER
E2E33_012295	E2E33_012295, MBF8419039.1	MA-13_genebank.gb_genome (77415/14/1)	gene	class I SAM-dependent methyltransferase
E2E33_012300	E2E33_012300, MBF8419040.1, rsfS	MA-13_genebank.gb_genome (77415/14/1)	gene	ribosome silencing factor
E2E33_012305	3.6.1.41, E2E33_012305, MBF8419041.1, yqeK	MA-13_genebank.gb_genome (77415/14/1)	gene	bis(5'-nucleosyl)-tetraphosphatase (symmetrical) YqeK
E2E33_012310	2.7.7.18, E2E33_012310, MBF8419042.1	MA-13_genebank.gb_genome (77415/14/1)	gene	nicotinate-nucleotide adenylyltransferase
E2E33_012315	E2E33_012315, MBF8419043.1, yhbY	MA-13_genebank.gb_genome (77415/14/1)	gene	ribosome assembly RNA-binding protein YhbY
E2E33_012320	1.1.1.25, E2E33_012320, MBF8419044.1, aroE	MA-13_genebank.gb_genome (77415/14/1)	gene	shikimate dehydrogenase
E2E33_012325	E2E33_012325, MBF8419045.1, yqeH	MA-13_genebank.gb_genome (77415/14/1)	gene	ribosome biogenesis GTPase YqeH
E2E33_012330	E2E33_012330, MBF8419046.1	MA-13_genebank.gb_genome (77415/14/1)	gene	YqeG family HAD IIIA-type phosphatase
E2E33_012365	E2E33_012365, MBF8419053.1	MA-13_genebank.gb_genome (77415/14/1)	gene	hypothetical protein
E2E33_012370	E2E33_012370, MBF8419054.1	MA-13_genebank.gb_genome (77415/14/1)	gene	NADH-dependent flavin oxidoreductase
E2E33_012375	E2E33_012375, MBF8419055.1	MA-13_genebank.gb_genome (77415/14/1)	gene	polyisoprenoid-binding protein
E2E33_012385	E2E33_012385, MBF8419056.1, dctA	MA-13_genebank.gb_genome (77415/14/1)	gene	C4-dicarboxylate transporter DctA
E2E33_012390	E2E33_012390, MBF8419057.1	MA-13_genebank.gb_genome (77415/14/1)	gene	glycerol-3-phosphate dehydrogenase/oxidase
E2E33_012395	2.7.1.30, E2E33_012395, MBF8419058.1, glpK	MA-13_genebank.gb_genome (77415/14/1)	gene	glycerol kinase GlpK
E2E33_012400	E2E33_012400, MBF8419059.1	MA-13_genebank.gb_genome (77415/14/1)	gene	aquaporin family protein
E2E33_012405	E2E33_012405, MBF8419060.1	MA-13_genebank.gb_genome (77415/14/1)	gene	glycerol-3-phosphate responsive antiterminator
E2E33_012415	E2E33_012415, MBF8419061.1	MA-13_genebank.gb_genome (77415/14/1)	gene	UvrD-helicase domain-containing protein
E2E33_012420	E2E33_012420, MBF8419062.1	MA-13_genebank.gb_genome (77415/14/1)	gene	glycosyltransferase family 2 protein
E2E33_012440	E2E33_012440, MBF8419066.1	MA-13_genebank.gb_genome (77415/14/1)	gene	ammonium transporter
E2E33_012445	E2E33_012445, MBF8419067.1	MA-13_genebank.gb_genome (77415/14/1)	gene	iron-containing alcohol dehydrogenase
E2E33_012450	E2E33_012450, MBF8419068.1	MA-13_genebank.gb_genome (77415/14/1)	gene	amino acid permease
E2E33_012455	E2E33_012455, MBF8419069.1	MA-13_genebank.gb_genome (77415/14/1)	gene	(Fe-S)-binding protein
E2E33_012465	E2E33_012465, MBF8419071.1	MA-13_genebank.gb_genome (77415/14/1)	gene	lactate utilization protein C
E2E33_012470	E2E33_012470, MBF8419072.1	MA-13_genebank.gb_genome (77415/14/1)	gene	amino acid permease
E2E33_012475	E2E33_012475, MBF8419073.1	MA-13_genebank.gb_genome (77415/14/1)	gene	hypothetical protein
E2E33_012480	E2E33_012480, MBF8419074.1	MA-13_genebank.gb_genome (77415/14/1)	gene	ABC transporter substrate-binding protein
E2E33_012485	E2E33_012485, MBF8419075.1	MA-13_genebank.gb_genome (77415/14/1)	gene	ABC transporter permease
E2E33_012490	E2E33_012490, MBF8419076.1	MA-13_genebank.gb_genome (77415/14/1)	gene	ABC transporter permease
E2E33_012495	E2E33_012495, MBF8419077.1	MA-13_genebank.gb_genome (77415/14/1)	gene	ABC transporter ATP-binding protein
E2E33_012500	E2E33_012500, MBF8419078.1	MA-13_genebank.gb_genome (77415/14/1)	gene	helix-turn-helix transcriptional regulator
E2E33_012505	E2E33_012505, MBF8419079.1	MA-13_genebank.gb_genome (77415/14/1)	gene	amino acid permease
E2E33_012510	E2E33_012510, MBF8419080.1	MA-13_genebank.gb_genome (77415/14/1)	gene	peptide MFS transporter
E2E33_012515	E2E33_012515, MBF8419081.1	MA-13_genebank.gb_genome (77415/14/1)	gene	amino acid permease
E2E33_012520	E2E33_012520, MBF8419082.1	MA-13_genebank.gb_genome (77415/14/1)	gene	nitroreductase
E2E33_012525	E2E33_012525, MBF8419083.1	MA-13_genebank.gb_genome (77415/14/1)	gene	aldo/keto reductase
E2E33_012530	E2E33_012530, MBF8419084.1	MA-13_genebank.gb_genome (77415/14/1)	gene	spore coat protein
E2E33_012545	E2E33_012545, MBF8419086.1	MA-13_genebank.gb_genome (77415/14/1)	gene	PFL family protein
E2E33_012550	E2E33_012550, MBF8419087.1	MA-13_genebank.gb_genome (77415/14/1)	gene	ACT domain-containing protein
E2E33_012555	E2E33_012555, MBF8419088.1	MA-13_genebank.gb_genome (77415/14/1)	gene	carboxymuconolactone decarboxylase family protein
E2E33_012560	E2E33_012560, MBF8419089.1	MA-13_genebank.gb_genome (77415/14/1)	gene	pyridoxal phosphate-dependent aminotransferase
E2E33_012615	E2E33_012615, MBF8419099.1	MA-13_genebank.gb_genome (77415/14/1)	gene	glycerate kinase
E2E33_012630	E2E33_012630, MBF8419102.1	MA-13_genebank.gb_genome (77415/14/1)	gene	anaerobic ribonucleoside triphosphate reductase
E2E33_012635	E2E33_012635, MBF8419103.1, nrdG	MA-13_genebank.gb_genome (77415/14/1)	gene	anaerobic ribonucleoside-triphosphate reductase activating protein
E2E33_012695	E2E33_012695, MBF8419115.1	MA-13_genebank.gb_genome (77415/14/1)	gene	transposase
E2E33_012710	E2E33_012710, MBF8419116.1	MA-13_genebank.gb_genome (77415/14/1)	gene	AAA family ATPase
E2E33_012715	E2E33_012715, MBF8419117.1	MA-13_genebank.gb_genome (77415/14/1)	gene	hypothetical protein
E2E33_012720	3.2.2.-, E2E33_012720, MBF8419118.1	MA-13_genebank.gb_genome (77415/14/1)	gene	DNA-3-methyladenine glycosylase
E2E33_012725	E2E33_012725, MBF8419119.1	MA-13_genebank.gb_genome (77415/14/1)	gene	hypothetical protein
E2E33_012730	E2E33_012730, MBF8419120.1, flaG	MA-13_genebank.gb_genome (77415/14/1)	gene	flagellar protein FlaG
E2E33_012735	E2E33_012735, MBF8419121.1, fliD	MA-13_genebank.gb_genome (77415/14/1)	gene	flagellar filament capping protein FliD
E2E33_012740	E2E33_012740, MBF8419122.1, fliS	MA-13_genebank.gb_genome (77415/14/1)	gene	flagellar export chaperone FliS
E2E33_012745	E2E33_012745, MBF8419123.1	MA-13_genebank.gb_genome (77415/14/1)	gene	flagellar protein FliT
E2E33_012750	E2E33_012750, MBF8419124.1, raiA	MA-13_genebank.gb_genome (77415/14/1)	gene	ribosome-associated translation inhibitor RaiA
E2E33_012755	E2E33_012755, MBF8419125.1	MA-13_genebank.gb_genome (77415/14/1)	gene	gamma-glutamyltransferase family protein
E2E33_012760	E2E33_012760, MBF8419126.1, secA	MA-13_genebank.gb_genome (77415/14/1)	gene	preprotein translocase subunit SecA
E2E33_012765	E2E33_012765, MBF8419127.1, prfB	MA-13_genebank.gb_genome (77415/14/1)	gene	peptide chain release factor 2
E2E33_012770	E2E33_012770, MBF8419128.1	MA-13_genebank.gb_genome (77415/14/1)	gene	YitT family protein
E2E33_012775	E2E33_012775, MBF8419129.1	MA-13_genebank.gb_genome (77415/14/1)	gene	cytochrome c
E2E33_012780	E2E33_012780, MBF8419130.1, ftsE	MA-13_genebank.gb_genome (77415/14/1)	gene	cell division ATP-binding protein FtsE
E2E33_012785	E2E33_012785, MBF8419131.1	MA-13_genebank.gb_genome (77415/14/1)	gene	ABC transporter permease
E2E33_012790	E2E33_012790, MBF8419132.1	MA-13_genebank.gb_genome (77415/14/1)	gene	peptidoglycan DD-metalloendopeptidase family protein
E2E33_012795	E2E33_012795, MBF8419133.1, cls	MA-13_genebank.gb_genome (77415/14/1)	gene	cardiolipin synthase
E2E33_012800	E2E33_012800, MBF8419134.1	MA-13_genebank.gb_genome (77415/14/1)	gene	O-acetylhomoserine aminocarboxypropyltransferase/cysteine synthase
E2E33_012805	1.1.1.3, E2E33_012805, MBF8419135.1	MA-13_genebank.gb_genome (77415/14/1)	gene	homoserine dehydrogenase
E2E33_012810	E2E33_012810, MBF8419136.1	MA-13_genebank.gb_genome (77415/14/1)	gene	peptidoglycan-binding protein
E2E33_012815	E2E33_012815, MBF8419137.1	MA-13_genebank.gb_genome (77415/14/1)	gene	PDZ domain-containing protein
E2E33_012820	E2E33_012820, MBF8419138.1	MA-13_genebank.gb_genome (77415/14/1)	gene	ABC transporter permease
E2E33_012825	E2E33_012825, MBF8419139.1	MA-13_genebank.gb_genome (77415/14/1)	gene	iron chelate uptake ABC transporter family permease subunit
E2E33_012830	E2E33_012830, MBF8419140.1	MA-13_genebank.gb_genome (77415/14/1)	gene	ATP-binding cassette domain-containing protein
E2E33_012835	E2E33_012835, MBF8419141.1	MA-13_genebank.gb_genome (77415/14/1)	gene	siderophore ABC transporter substrate-binding protein
E2E33_012840	E2E33_012840, MBF8419142.1	MA-13_genebank.gb_genome (77415/14/1)	gene	4Fe-4S dicluster domain-containing protein
E2E33_012850	E2E33_012850, MBF8419144.1	MA-13_genebank.gb_genome (77415/14/1)	gene	response regulator transcription factor
E2E33_012855	E2E33_012855, MBF8419145.1	MA-13_genebank.gb_genome (77415/14/1)	gene	PAS domain S-box protein
E2E33_012860	1.3.3.4, E2E33_012860, MBF8419146.1, hemG	MA-13_genebank.gb_genome (77415/14/1)	gene	protoporphyrinogen oxidase
E2E33_012865	E2E33_012865, MBF8419147.1, pstS	MA-13_genebank.gb_genome (77415/14/1)	gene	phosphate ABC transporter substrate-binding protein PstS family protein
E2E33_012875	E2E33_012875, MBF8419149.1, pstC	MA-13_genebank.gb_genome (77415/14/1)	gene	phosphate ABC transporter permease subunit PstC
E2E33_012880	E2E33_012880, MBF8419150.1, pstA	MA-13_genebank.gb_genome (77415/14/1)	gene	phosphate ABC transporter permease PstA
E2E33_012885	E2E33_012885, MBF8419151.1, pstB	MA-13_genebank.gb_genome (77415/14/1)	gene	phosphate ABC transporter ATP-binding protein
E2E33_012890	E2E33_012890, MBF8419152.1, pstB	MA-13_genebank.gb_genome (77415/14/1)	gene	phosphate ABC transporter ATP-binding protein
E2E33_012915	E2E33_012915, MBF8419157.1	MA-13_genebank.gb_genome (77415/14/1)	gene	HD domain-containing protein
E2E33_012920	E2E33_012920, MBF8419158.1	MA-13_genebank.gb_genome (77415/14/1)	gene	CsbA family protein
E2E33_012925	E2E33_012925, MBF8419159.1	MA-13_genebank.gb_genome (77415/14/1)	gene	DUF2164 domain-containing protein
E2E33_012930	E2E33_012930, MBF8419160.1, uvrB	MA-13_genebank.gb_genome (77415/14/1)	gene	excinuclease ABC subunit UvrB
E2E33_012935	3.1.25.-, E2E33_012935, MBF8419161.1, uvrA	MA-13_genebank.gb_genome (77415/14/1)	gene	excinuclease ABC subunit UvrA
E2E33_012940	2.7.7.39, E2E33_012940, MBF8419162.1, tagD	MA-13_genebank.gb_genome (77415/14/1)	gene	glycerol-3-phosphate cytidylyltransferase
E2E33_012945	1.1.1.49, E2E33_012945, MBF8419163.1	MA-13_genebank.gb_genome (77415/14/1)	gene	glucose-6-phosphate dehydrogenase
E2E33_012950	2.7.7.7, E2E33_012950, MBF8419164.1	MA-13_genebank.gb_genome (77415/14/1)	gene	DNA polymerase IV
E2E33_012955	E2E33_012955, MBF8419165.1	MA-13_genebank.gb_genome (77415/14/1)	gene	chemotaxis protein CheW
E2E33_012960	E2E33_012960, MBF8419166.1	MA-13_genebank.gb_genome (77415/14/1)	gene	M20/M25/M40 family metallo-hydrolase
E2E33_012970	E2E33_012970, MBF8419168.1	MA-13_genebank.gb_genome (77415/14/1)	gene	L,D-transpeptidase
E2E33_012975	E2E33_012975, MBF8419169.1	MA-13_genebank.gb_genome (77415/14/1)	gene	BrxA/BrxB family bacilliredoxin
E2E33_012980	2.7.1.56, E2E33_012980, MBF8419170.1, pfkB	MA-13_genebank.gb_genome (77415/14/1)	gene	1-phosphofructokinase
E2E33_012985	E2E33_012985, MBF8419171.1	MA-13_genebank.gb_genome (77415/14/1)	gene	2-oxo acid dehydrogenase subunit E2
E2E33_012990	E2E33_012990, MBF8419172.1	MA-13_genebank.gb_genome (77415/14/1)	gene	alpha-ketoacid dehydrogenase subunit beta
E2E33_012995	E2E33_012995, MBF8419173.1	MA-13_genebank.gb_genome (77415/14/1)	gene	thiamine pyrophosphate-dependent dehydrogenase E1 component subunit alpha
E2E33_013000	1.8.1.4, E2E33_013000, MBF8419174.1, lpdA	MA-13_genebank.gb_genome (77415/14/1)	gene	dihydrolipoyl dehydrogenase
E2E33_013005	E2E33_013005, MBF8419175.1	MA-13_genebank.gb_genome (77415/14/1)	gene	Glu/Leu/Phe/Val dehydrogenase
E2E33_013020	E2E33_013020, MBF8419177.1	MA-13_genebank.gb_genome (77415/14/1)	gene	DUF2627 domain-containing protein
E2E33_013030	E2E33_013030, MBF8419179.1, spo0A	MA-13_genebank.gb_genome (77415/14/1)	gene	sporulation transcription factor Spo0A
E2E33_013035	3.4.21.116, E2E33_013035, MBF8419180.1, spoIVB	MA-13_genebank.gb_genome (77415/14/1)	gene	SpoIVB peptidase
E2E33_013040	E2E33_013040, MBF8419181.1, recN	MA-13_genebank.gb_genome (77415/14/1)	gene	DNA repair protein RecN
E2E33_013045	E2E33_013045, MBF8419182.1, argR	MA-13_genebank.gb_genome (77415/14/1)	gene	transcriptional regulator ArgR
E2E33_013050	E2E33_013050, MBF8419183.1	MA-13_genebank.gb_genome (77415/14/1)	gene	TlyA family RNA methyltransferase
E2E33_013055	2.2.1.7, E2E33_013055, MBF8419184.1	MA-13_genebank.gb_genome (77415/14/1)	gene	1-deoxy-D-xylulose-5-phosphate synthase
E2E33_013060	E2E33_013060, MBF8419185.1	MA-13_genebank.gb_genome (77415/14/1)	gene	polyprenyl synthetase family protein
E2E33_013065	3.1.11.6, E2E33_013065, MBF8419186.1	MA-13_genebank.gb_genome (77415/14/1)	gene	exodeoxyribonuclease VII small subunit
E2E33_013070	3.1.11.6, E2E33_013070, MBF8419187.1	MA-13_genebank.gb_genome (77415/14/1)	gene	exodeoxyribonuclease VII large subunit
E2E33_013075	1.5.1.5, 3.5.4.9, E2E33_013075, MBF8419188.1, folD	MA-13_genebank.gb_genome (77415/14/1)	gene	bifunctional methylenetetrahydrofolate dehydrogenase/methenyltetrahydrofolate cyclohydrolase FolD
E2E33_013080	E2E33_013080, MBF8419189.1, nusB	MA-13_genebank.gb_genome (77415/14/1)	gene	transcription antitermination factor NusB
E2E33_013085	E2E33_013085, MBF8419190.1	MA-13_genebank.gb_genome (77415/14/1)	gene	Asp23/Gls24 family envelope stress response protein
E2E33_013090	6.3.4.14, E2E33_013090, MBF8419191.1, accC	MA-13_genebank.gb_genome (77415/14/1)	gene	acetyl-CoA carboxylase biotin carboxylase subunit
E2E33_013095	E2E33_013095, MBF8419192.1, accB	MA-13_genebank.gb_genome (77415/14/1)	gene	acetyl-CoA carboxylase biotin carboxyl carrier protein
E2E33_013100	E2E33_013100, MBF8419193.1	MA-13_genebank.gb_genome (77415/14/1)	gene	SpoIIIAH-like family protein
E2E33_013105	E2E33_013105, MBF8419194.1, spoIIIAG	MA-13_genebank.gb_genome (77415/14/1)	gene	stage III sporulation protein AG
E2E33_013110	E2E33_013110, MBF8419195.1, spoIIIAF	MA-13_genebank.gb_genome (77415/14/1)	gene	stage III sporulation protein AF
E2E33_013120	E2E33_013120, MBF8419197.1, spoIIIAD	MA-13_genebank.gb_genome (77415/14/1)	gene	stage III sporulation protein AD
E2E33_013125	E2E33_013125, MBF8419198.1, spoIIIAC	MA-13_genebank.gb_genome (77415/14/1)	gene	stage III sporulation protein AC
E2E33_013130	E2E33_013130, MBF8419199.1	MA-13_genebank.gb_genome (77415/14/1)	gene	stage III sporulation protein SpoAB
E2E33_013135	E2E33_013135, MBF8419200.1, spoIIIAA	MA-13_genebank.gb_genome (77415/14/1)	gene	stage III sporulation protein AA
E2E33_013140	E2E33_013140, MBF8419201.1, efp	MA-13_genebank.gb_genome (77415/14/1)	gene	elongation factor P
E2E33_013145	E2E33_013145, MBF8419202.1	MA-13_genebank.gb_genome (77415/14/1)	gene	aminopeptidase P family protein
E2E33_013150	4.2.1.10, E2E33_013150, MBF8419203.1, aroQ	MA-13_genebank.gb_genome (77415/14/1)	gene	type II 3-dehydroquinate dehydratase
E2E33_013155	E2E33_013155, MBF8419204.1	MA-13_genebank.gb_genome (77415/14/1)	gene	hypothetical protein
E2E33_013160	E2E33_013160, MBF8419205.1	MA-13_genebank.gb_genome (77415/14/1)	gene	DUF1385 domain-containing protein
E2E33_013165	E2E33_013165, MBF8419206.1	MA-13_genebank.gb_genome (77415/14/1)	gene	hypothetical protein
E2E33_013170	E2E33_013170, MBF8419207.1	MA-13_genebank.gb_genome (77415/14/1)	gene	patatin-like phospholipase family protein
E2E33_013195	E2E33_013195, MBF8419209.1	MA-13_genebank.gb_genome (77415/14/1)	gene	vitamin B12-dependent ribonucleotide reductase
E2E33_013200	E2E33_013200, MBF8419210.1	MA-13_genebank.gb_genome (77415/14/1)	gene	lipoate--protein ligase family protein
E2E33_013205	E2E33_013205, MBF8419211.1	MA-13_genebank.gb_genome (77415/14/1)	gene	rhodanese-like domain-containing protein
E2E33_013210	1.4.4.2, E2E33_013210, MBF8419212.1, gcvPB	MA-13_genebank.gb_genome (77415/14/1)	gene	aminomethyl-transferring glycine dehydrogenase subunit GcvPB
E2E33_013215	1.4.4.2, E2E33_013215, MBF8419213.1, gcvPA	MA-13_genebank.gb_genome (77415/14/1)	gene	aminomethyl-transferring glycine dehydrogenase subunit GcvPA
E2E33_013220	2.1.2.10, E2E33_013220, MBF8419214.1, gcvT	MA-13_genebank.gb_genome (77415/14/1)	gene	glycine cleavage system aminomethyltransferase GcvT
E2E33_013225	E2E33_013225, MBF8419215.1	MA-13_genebank.gb_genome (77415/14/1)	gene	DEAD/DEAH box helicase
E2E33_013230	E2E33_013230, MBF8419216.1	MA-13_genebank.gb_genome (77415/14/1)	gene	YqhG family protein
E2E33_013240	E2E33_013240, MBF8419218.1	MA-13_genebank.gb_genome (77415/14/1)	gene	shikimate kinase
E2E33_013245	E2E33_013245, MBF8419219.1	MA-13_genebank.gb_genome (77415/14/1)	gene	DNA transport platform protein
E2E33_013250	E2E33_013250, MBF8419220.1	MA-13_genebank.gb_genome (77415/14/1)	gene	ComGF family competence protein
E2E33_013255	E2E33_013255, MBF8419221.1	MA-13_genebank.gb_genome (77415/14/1)	gene	type II secretion system protein
E2E33_013260	E2E33_013260, MBF8419222.1	MA-13_genebank.gb_genome (77415/14/1)	gene	prepilin-type N-terminal cleavage/methylation domain-containing protein
E2E33_013265	E2E33_013265, MBF8419223.1	MA-13_genebank.gb_genome (77415/14/1)	gene	prepilin-type N-terminal cleavage/methylation domain-containing protein
E2E33_013270	E2E33_013270, MBF8419224.1	MA-13_genebank.gb_genome (77415/14/1)	gene	type II secretion system F family protein
E2E33_013275	E2E33_013275, MBF8419225.1	MA-13_genebank.gb_genome (77415/14/1)	gene	type II/IV secretion system protein
E2E33_013280	E2E33_013280, MBF8419226.1	MA-13_genebank.gb_genome (77415/14/1)	gene	helix-turn-helix domain-containing protein
E2E33_013285	E2E33_013285, MBF8419227.1	MA-13_genebank.gb_genome (77415/14/1)	gene	DUF2626 domain-containing protein
E2E33_013290	E2E33_013290, MBF8419228.1	MA-13_genebank.gb_genome (77415/14/1)	gene	MBL fold metallo-hydrolase
E2E33_013300	2.7.1.2, E2E33_013300, MBF8419230.1	MA-13_genebank.gb_genome (77415/14/1)	gene	ROK family glucokinase
E2E33_013305	E2E33_013305, MBF8419231.1	MA-13_genebank.gb_genome (77415/14/1)	gene	YqgQ family protein
E2E33_013310	E2E33_013310, MBF8419232.1	MA-13_genebank.gb_genome (77415/14/1)	gene	rhomboid family intramembrane serine protease
E2E33_013325	E2E33_013325, MBF8419235.1	MA-13_genebank.gb_genome (77415/14/1)	gene	hypothetical protein
E2E33_013330	E2E33_013330, MBF8419236.1	MA-13_genebank.gb_genome (77415/14/1)	gene	penicillin-binding protein 2
E2E33_013335	E2E33_013335, MBF8419237.1	MA-13_genebank.gb_genome (77415/14/1)	gene	MFS transporter
E2E33_013340	E2E33_013340, MBF8419238.1	MA-13_genebank.gb_genome (77415/14/1)	gene	superoxide dismutase
E2E33_013345	E2E33_013345, MBF8419239.1	MA-13_genebank.gb_genome (77415/14/1)	gene	hypothetical protein
E2E33_013350	1.17.7.1, E2E33_013350, MBF8419240.1, gcpE, ispG	MA-13_genebank.gb_genome (77415/14/1)	gene	flavodoxin-dependent (E)-4-hydroxy-3-methylbut-2-enyl-diphosphate synthase
E2E33_013355	E2E33_013355, MBF8419241.1	MA-13_genebank.gb_genome (77415/14/1)	gene	hypothetical protein
E2E33_013360	E2E33_013360, MBF8419242.1	MA-13_genebank.gb_genome (77415/14/1)	gene	transcriptional repressor
E2E33_013365	E2E33_013365, MBF8419243.1	MA-13_genebank.gb_genome (77415/14/1)	gene	metal ABC transporter permease
E2E33_013370	E2E33_013370, MBF8419244.1	MA-13_genebank.gb_genome (77415/14/1)	gene	ABC transporter ATP-binding protein
E2E33_013375	E2E33_013375, MBF8419245.1	MA-13_genebank.gb_genome (77415/14/1)	gene	DUF2624 domain-containing protein
E2E33_013380	E2E33_013380, MBF8419246.1	MA-13_genebank.gb_genome (77415/14/1)	gene	C40 family peptidase
E2E33_013385	3.1.21.2, E2E33_013385, MBF8419247.1	MA-13_genebank.gb_genome (77415/14/1)	gene	deoxyribonuclease IV
E2E33_013390	E2E33_013390, MBF8419248.1	MA-13_genebank.gb_genome (77415/14/1)	gene	DEAD/DEAH box helicase
E2E33_013395	E2E33_013395, MBF8419249.1	MA-13_genebank.gb_genome (77415/14/1)	gene	hypothetical protein
E2E33_013400	1.17.7.4, E2E33_013400, MBF8419250.1	MA-13_genebank.gb_genome (77415/14/1)	gene	4-hydroxy-3-methylbut-2-enyl diphosphate reductase
E2E33_013405	E2E33_013405, MBF8419251.1	MA-13_genebank.gb_genome (77415/14/1)	gene	Nif3-like dinuclear metal center hexameric protein
E2E33_013410	E2E33_013410, MBF8419252.1	MA-13_genebank.gb_genome (77415/14/1)	gene	tRNA (adenine-N(1))-methyltransferase
E2E33_013415	E2E33_013415, MBF8419253.1	MA-13_genebank.gb_genome (77415/14/1)	gene	cytochrome c
E2E33_013420	E2E33_013420, MBF8419254.1	MA-13_genebank.gb_genome (77415/14/1)	gene	hypothetical protein
E2E33_013425	E2E33_013425, MBF8419255.1, rpoD	MA-13_genebank.gb_genome (77415/14/1)	gene	RNA polymerase sigma factor RpoD
E2E33_013430	E2E33_013430, MBF8419256.1	MA-13_genebank.gb_genome (77415/14/1)	gene	DNA primase
E2E33_013435	E2E33_013435, MBF8419257.1	MA-13_genebank.gb_genome (77415/14/1)	gene	kinase/pyrophosphorylase
E2E33_013440	E2E33_013440, MBF8419258.1	MA-13_genebank.gb_genome (77415/14/1)	gene	helix-turn-helix transcriptional regulator
E2E33_013445	E2E33_013445, MBF8419259.1, recO	MA-13_genebank.gb_genome (77415/14/1)	gene	DNA repair protein RecO
E2E33_013455	E2E33_013455, MBF8419261.1, era	MA-13_genebank.gb_genome (77415/14/1)	gene	GTPase Era
E2E33_013500	E2E33_013500, MBF8419262.1	MA-13_genebank.gb_genome (77415/14/1)	gene	SprT family protein
E2E33_013510	E2E33_013510, MBF8419264.1	MA-13_genebank.gb_genome (77415/14/1)	gene	RNA-binding transcriptional accessory protein
E2E33_013515	E2E33_013515, MBF8419265.1	MA-13_genebank.gb_genome (77415/14/1)	gene	SpoIIE family protein phosphatase
E2E33_013520	E2E33_013520, MBF8419266.1, sigB	MA-13_genebank.gb_genome (77415/14/1)	gene	RNA polymerase sigma factor SigB
E2E33_013525	2.7.11.1, E2E33_013525, MBF8419267.1, rsbW	MA-13_genebank.gb_genome (77415/14/1)	gene	anti-sigma B factor RsbW
E2E33_013530	E2E33_013530, MBF8419268.1	MA-13_genebank.gb_genome (77415/14/1)	gene	anti-sigma factor antagonist
E2E33_013535	E2E33_013535, MBF8419269.1	MA-13_genebank.gb_genome (77415/14/1)	gene	PP2C family protein-serine/threonine phosphatase
E2E33_013540	E2E33_013540, MBF8419270.1	MA-13_genebank.gb_genome (77415/14/1)	gene	anti-sigma regulatory factor
E2E33_013545	E2E33_013545, MBF8419271.1	MA-13_genebank.gb_genome (77415/14/1)	gene	STAS domain-containing protein
E2E33_013550	E2E33_013550, MBF8419272.1	MA-13_genebank.gb_genome (77415/14/1)	gene	RsbT co-antagonist protein RsbRA
E2E33_013555	E2E33_013555, MBF8419273.1	MA-13_genebank.gb_genome (77415/14/1)	gene	type II toxin-antitoxin system PemK/MazF family toxin
E2E33_013560	E2E33_013560, MBF8419274.1	MA-13_genebank.gb_genome (77415/14/1)	gene	antitoxin endoai
E2E33_013565	5.1.1.1, E2E33_013565, MBF8419275.1, alr	MA-13_genebank.gb_genome (77415/14/1)	gene	alanine racemase
E2E33_013570	E2E33_013570, MBF8419276.1	MA-13_genebank.gb_genome (77415/14/1)	gene	outer membrane lipoprotein carrier protein LolA
E2E33_013575	2.7.8.7, E2E33_013575, MBF8419277.1	MA-13_genebank.gb_genome (77415/14/1)	gene	holo-ACP synthase
E2E33_013580	E2E33_013580, MBF8419278.1	MA-13_genebank.gb_genome (77415/14/1)	gene	rhomboid family intramembrane serine protease
E2E33_013585	E2E33_013585, MBF8419279.1	MA-13_genebank.gb_genome (77415/14/1)	gene	DEAD/DEAH box helicase
E2E33_013590	E2E33_013590, MBF8419280.1	MA-13_genebank.gb_genome (77415/14/1)	gene	LysE family transporter
E2E33_013595	5.4.2.6, E2E33_013595, MBF8419281.1, pgmB	MA-13_genebank.gb_genome (77415/14/1)	gene	beta-phosphoglucomutase
E2E33_013600	E2E33_013600, MBF8419282.1	MA-13_genebank.gb_genome (77415/14/1)	gene	LacI family DNA-binding transcriptional regulator
E2E33_013605	E2E33_013605, MBF8419283.1	MA-13_genebank.gb_genome (77415/14/1)	gene	alpha-glucosidase
E2E33_013610	E2E33_013610, MBF8419284.1	MA-13_genebank.gb_genome (77415/14/1)	gene	alpha-glycosidase
E2E33_013620	E2E33_013620, MBF8419286.1	MA-13_genebank.gb_genome (77415/14/1)	gene	sugar ABC transporter permease
E2E33_013635	E2E33_013635, MBF8419289.1	MA-13_genebank.gb_genome (77415/14/1)	gene	glycoside hydrolase family 65 protein
E2E33_013645	E2E33_013645, MBF8419291.1	MA-13_genebank.gb_genome (77415/14/1)	gene	UDP-N-acetylmuramoyl-tripeptide--D-alanyl-D- alanine ligase
E2E33_013650	6.3.2.4, E2E33_013650, MBF8419292.1	MA-13_genebank.gb_genome (77415/14/1)	gene	D-alanine--D-alanine ligase
E2E33_013655	E2E33_013655, MBF8419293.1	MA-13_genebank.gb_genome (77415/14/1)	gene	hypothetical protein
E2E33_013660	E2E33_013660, MBF8419294.1	MA-13_genebank.gb_genome (77415/14/1)	gene	HlyC/CorC family transporter
E2E33_013665	E2E33_013665, MBF8419295.1	MA-13_genebank.gb_genome (77415/14/1)	gene	MerR family transcriptional regulator
E2E33_013670	E2E33_013670, MBF8419296.1	MA-13_genebank.gb_genome (77415/14/1)	gene	HlyC/CorC family transporter
E2E33_013680	E2E33_013680, MBF8419298.1	MA-13_genebank.gb_genome (77415/14/1)	gene	SWIM zinc finger family protein
E2E33_013685	E2E33_013685, MBF8419299.1	MA-13_genebank.gb_genome (77415/14/1)	gene	DEAD/DEAH box helicase
E2E33_013695	E2E33_013695, MBF8419300.1	MA-13_genebank.gb_genome (77415/14/1)	gene	YwpF-like family protein
E2E33_013700	E2E33_013700, MBF8419301.1, ssb	MA-13_genebank.gb_genome (77415/14/1)	gene	single-stranded DNA-binding protein
E2E33_013710	4.2.1.59, E2E33_013710, MBF8419303.1, fabZ	MA-13_genebank.gb_genome (77415/14/1)	gene	3-hydroxyacyl-ACP dehydratase FabZ
E2E33_013715	E2E33_013715, MBF8419304.1	MA-13_genebank.gb_genome (77415/14/1)	gene	flagellar hook-basal body protein
E2E33_013720	E2E33_013720, MBF8419305.1	MA-13_genebank.gb_genome (77415/14/1)	gene	flagellar hook-basal body protein
E2E33_013725	E2E33_013725, MBF8419306.1	MA-13_genebank.gb_genome (77415/14/1)	gene	rod shape-determining protein
E2E33_013730	E2E33_013730, MBF8419307.1, spoIIID	MA-13_genebank.gb_genome (77415/14/1)	gene	sporulation transcriptional regulator SpoIIID
E2E33_013735	E2E33_013735, MBF8419308.1	MA-13_genebank.gb_genome (77415/14/1)	gene	M23 family metallopeptidase
E2E33_013740	E2E33_013740, MBF8419309.1, spoIID	MA-13_genebank.gb_genome (77415/14/1)	gene	stage II sporulation protein D
E2E33_013745	2.5.1.7, E2E33_013745, MBF8419310.1, murA	MA-13_genebank.gb_genome (77415/14/1)	gene	UDP-N-acetylglucosamine 1-carboxyvinyltransferase
E2E33_013750	E2E33_013750, MBF8419311.1	MA-13_genebank.gb_genome (77415/14/1)	gene	YwmB family TATA-box binding protein
E2E33_013755	E2E33_013755, MBF8419312.1	MA-13_genebank.gb_genome (77415/14/1)	gene	DUF1146 domain-containing protein
E2E33_013760	E2E33_013760, MBF8419313.1	MA-13_genebank.gb_genome (77415/14/1)	gene	F0F1 ATP synthase subunit epsilon
E2E33_013765	E2E33_013765, MBF8419314.1, atpD	MA-13_genebank.gb_genome (77415/14/1)	gene	F0F1 ATP synthase subunit beta
E2E33_013770	E2E33_013770, MBF8419315.1	MA-13_genebank.gb_genome (77415/14/1)	gene	F0F1 ATP synthase subunit gamma
E2E33_013775	E2E33_013775, MBF8419316.1	MA-13_genebank.gb_genome (77415/14/1)	gene	F0F1 ATP synthase subunit alpha
E2E33_013780	E2E33_013780, MBF8419317.1	MA-13_genebank.gb_genome (77415/14/1)	gene	F0F1 ATP synthase subunit delta
E2E33_013785	E2E33_013785, MBF8419318.1, atpF	MA-13_genebank.gb_genome (77415/14/1)	gene	F0F1 ATP synthase subunit B
E2E33_013790	E2E33_013790, MBF8419319.1, atpE	MA-13_genebank.gb_genome (77415/14/1)	gene	F0F1 ATP synthase subunit C
E2E33_013795	E2E33_013795, MBF8419320.1, atpB	MA-13_genebank.gb_genome (77415/14/1)	gene	F0F1 ATP synthase subunit A
E2E33_013805	2.4.2.9, E2E33_013805, MBF8419322.1, upp	MA-13_genebank.gb_genome (77415/14/1)	gene	uracil phosphoribosyltransferase
E2E33_013810	E2E33_013810, MBF8419323.1	MA-13_genebank.gb_genome (77415/14/1)	gene	serine hydroxymethyltransferase
E2E33_013815	E2E33_013815, MBF8419324.1	MA-13_genebank.gb_genome (77415/14/1)	gene	TIGR01440 family protein
E2E33_013820	5.3.1.6, E2E33_013820, MBF8419325.1, rpiB	MA-13_genebank.gb_genome (77415/14/1)	gene	ribose 5-phosphate isomerase B
E2E33_013830	E2E33_013830, MBF8419327.1	MA-13_genebank.gb_genome (77415/14/1)	gene	low molecular weight protein arginine phosphatase
E2E33_013860	2.4.2.10, E2E33_013860, MBF8419331.1	MA-13_genebank.gb_genome (77415/14/1)	gene	orotate phosphoribosyltransferase
E2E33_013865	4.1.1.23, E2E33_013865, MBF8419332.1, pyrF	MA-13_genebank.gb_genome (77415/14/1)	gene	orotidine-5'-phosphate decarboxylase
E2E33_013875	1.3.1.14, E2E33_013875, MBF8419334.1	MA-13_genebank.gb_genome (77415/14/1)	gene	dihydroorotate dehydrogenase
E2E33_013885	6.3.5.5, E2E33_013885, MBF8419336.1, carB	MA-13_genebank.gb_genome (77415/14/1)	gene	carbamoyl-phosphate synthase large subunit
E2E33_013890	6.3.5.5, E2E33_013890, MBF8419337.1, carA	MA-13_genebank.gb_genome (77415/14/1)	gene	glutamine-hydrolyzing carbamoyl-phosphate synthase small subunit
E2E33_013895	3.5.2.3, E2E33_013895, MBF8419338.1	MA-13_genebank.gb_genome (77415/14/1)	gene	dihydroorotase
E2E33_013900	2.1.3.2, E2E33_013900, MBF8419339.1	MA-13_genebank.gb_genome (77415/14/1)	gene	aspartate carbamoyltransferase catalytic subunit
E2E33_013905	2.4.2.9, E2E33_013905, MBF8419340.1, pyrR	MA-13_genebank.gb_genome (77415/14/1)	gene	bifunctional pyr operon transcriptional regulator/uracil phosphoribosyltransferase PyrR
E2E33_013910	E2E33_013910, MBF8419341.1	MA-13_genebank.gb_genome (77415/14/1)	gene	RluA family pseudouridine synthase
E2E33_013915	3.4.23.36, E2E33_013915, MBF8419342.1, lspA	MA-13_genebank.gb_genome (77415/14/1)	gene	signal peptidase II
E2E33_013920	E2E33_013920, MBF8419343.1	MA-13_genebank.gb_genome (77415/14/1)	gene	hypothetical protein
E2E33_013925	6.1.1.5, E2E33_013925, MBF8419344.1, ileS	MA-13_genebank.gb_genome (77415/14/1)	gene	isoleucine--tRNA ligase
E2E33_013930	E2E33_013930, MBF8419345.1	MA-13_genebank.gb_genome (77415/14/1)	gene	DivIVA domain-containing protein
E2E33_013935	E2E33_013935, MBF8419346.1	MA-13_genebank.gb_genome (77415/14/1)	gene	RNA-binding protein
E2E33_013940	E2E33_013940, MBF8419347.1	MA-13_genebank.gb_genome (77415/14/1)	gene	YggT family protein
E2E33_013945	E2E33_013945, MBF8419348.1	MA-13_genebank.gb_genome (77415/14/1)	gene	cell division protein SepF
E2E33_013950	E2E33_013950, MBF8419349.1	MA-13_genebank.gb_genome (77415/14/1)	gene	YggS family pyridoxal phosphate-dependent enzyme
E2E33_013955	E2E33_013955, MBF8419350.1, pgeF	MA-13_genebank.gb_genome (77415/14/1)	gene	peptidoglycan editing factor PgeF
E2E33_013960	E2E33_013960, MBF8419351.1	MA-13_genebank.gb_genome (77415/14/1)	gene	LysM peptidoglycan-binding domain-containing protein
E2E33_013965	E2E33_013965, MBF8419352.1	MA-13_genebank.gb_genome (77415/14/1)	gene	YlmC/YmxH family sporulation protein
E2E33_013970	E2E33_013970, MBF8419353.1, sigG	MA-13_genebank.gb_genome (77415/14/1)	gene	RNA polymerase sporulation sigma factor SigG
E2E33_013975	E2E33_013975, MBF8419354.1, sigE	MA-13_genebank.gb_genome (77415/14/1)	gene	RNA polymerase sporulation sigma factor SigE
E2E33_013985	E2E33_013985, MBF8419356.1, ftsZ	MA-13_genebank.gb_genome (77415/14/1)	gene	cell division protein FtsZ
E2E33_013990	E2E33_013990, MBF8419357.1, ftsA	MA-13_genebank.gb_genome (77415/14/1)	gene	cell division protein FtsA
E2E33_013995	E2E33_013995, MBF8419358.1	MA-13_genebank.gb_genome (77415/14/1)	gene	FtsQ-type POTRA domain-containing protein
E2E33_014000	2.4.1.227, E2E33_014000, MBF8419359.1, murG	MA-13_genebank.gb_genome (77415/14/1)	gene	undecaprenyldiphospho-muramoylpentapeptide beta-N-acetylglucosaminyltransferase
E2E33_014005	E2E33_014005, MBF8419360.1, spoVE	MA-13_genebank.gb_genome (77415/14/1)	gene	stage V sporulation protein E
E2E33_014010	6.3.2.9, E2E33_014010, MBF8419361.1	MA-13_genebank.gb_genome (77415/14/1)	gene	UDP-N-acetylmuramoyl-L-alanine--D-glutamate ligase
E2E33_014015	2.7.8.13, E2E33_014015, MBF8419362.1	MA-13_genebank.gb_genome (77415/14/1)	gene	phospho-N-acetylmuramoyl-pentapeptide- transferase
E2E33_014020	E2E33_014020, MBF8419363.1	MA-13_genebank.gb_genome (77415/14/1)	gene	hypothetical protein
E2E33_014025	6.3.2.13, E2E33_014025, MBF8419364.1	MA-13_genebank.gb_genome (77415/14/1)	gene	UDP-N-acetylmuramoyl-L-alanyl-D-glutamate--2, 6-diaminopimelate ligase
E2E33_014035	E2E33_014035, MBF8419366.1	MA-13_genebank.gb_genome (77415/14/1)	gene	penicillin-binding protein
E2E33_014040	E2E33_014040, MBF8419367.1, ftsL	MA-13_genebank.gb_genome (77415/14/1)	gene	cell division protein FtsL
E2E33_014045	E2E33_014045, MBF8419368.1, rsmH	MA-13_genebank.gb_genome (77415/14/1)	gene	16S rRNA (cytosine(1402)-N(4))-methyltransferase RsmH
E2E33_014050	E2E33_014050, MBF8419369.1, mraZ	MA-13_genebank.gb_genome (77415/14/1)	gene	division/cell wall cluster transcriptional repressor MraZ
E2E33_014055	E2E33_014055, MBF8419370.1, bshC	MA-13_genebank.gb_genome (77415/14/1)	gene	bacillithiol biosynthesis cysteine-adding enzyme BshC
E2E33_014060	1.1.1.169, E2E33_014060, MBF8419371.1	MA-13_genebank.gb_genome (77415/14/1)	gene	2-dehydropantoate 2-reductase
E2E33_014065	E2E33_014065, MBF8419372.1	MA-13_genebank.gb_genome (77415/14/1)	gene	N-acetyltransferase
E2E33_014070	E2E33_014070, MBF8419373.1	MA-13_genebank.gb_genome (77415/14/1)	gene	RsfA family transcriptional regulator
E2E33_014075	E2E33_014075, MBF8419374.1, rpmF	MA-13_genebank.gb_genome (77415/14/1)	gene	50S ribosomal protein L32
E2E33_014080	E2E33_014080, MBF8419375.1	MA-13_genebank.gb_genome (77415/14/1)	gene	DUF177 domain-containing protein
E2E33_014085	E2E33_014085, MBF8419376.1	MA-13_genebank.gb_genome (77415/14/1)	gene	nucleotidyltransferase
E2E33_014090	E2E33_014090, MBF8419377.1	MA-13_genebank.gb_genome (77415/14/1)	gene	PDZ domain-containing protein
E2E33_014100	E2E33_014100, MBF8419379.1, ylbJ	MA-13_genebank.gb_genome (77415/14/1)	gene	sporulation integral membrane protein YlbJ
E2E33_014105	2.7.7.3, E2E33_014105, MBF8419380.1, coaD	MA-13_genebank.gb_genome (77415/14/1)	gene	pantetheine-phosphate adenylyltransferase
E2E33_014110	2.1.1.171, E2E33_014110, MBF8419381.1, rsmD	MA-13_genebank.gb_genome (77415/14/1)	gene	16S rRNA (guanine(966)-N(2))-methyltransferase RsmD
E2E33_014115	E2E33_014115, MBF8419382.1	MA-13_genebank.gb_genome (77415/14/1)	gene	methylthioribose kinase
E2E33_014120	E2E33_014120, MBF8419383.1	MA-13_genebank.gb_genome (77415/14/1)	gene	DUF2129 domain-containing protein
E2E33_014125	E2E33_014125, MBF8419384.1	MA-13_genebank.gb_genome (77415/14/1)	gene	YlbF family regulator
E2E33_014130	E2E33_014130, MBF8419385.1	MA-13_genebank.gb_genome (77415/14/1)	gene	diacylglycerol kinase
E2E33_014135	E2E33_014135, MBF8419386.1, putP	MA-13_genebank.gb_genome (77415/14/1)	gene	sodium/proline symporter PutP
E2E33_014140	2.1.1.190, E2E33_014140, MBF8419387.1, rlmD	MA-13_genebank.gb_genome (77415/14/1)	gene	23S rRNA (uracil(1939)-C(5))-methyltransferase RlmD
E2E33_014145	E2E33_014145, MBF8419388.1	MA-13_genebank.gb_genome (77415/14/1)	gene	hypothetical protein
E2E33_014155	E2E33_014155, MBF8419390.1	MA-13_genebank.gb_genome (77415/14/1)	gene	post-transcriptional regulator
E2E33_014160	E2E33_014160, MBF8419391.1, spoVB	MA-13_genebank.gb_genome (77415/14/1)	gene	stage V sporulation protein B
E2E33_014165	E2E33_014165, MBF8419392.1	MA-13_genebank.gb_genome (77415/14/1)	gene	DUF421 domain-containing protein
E2E33_014170	E2E33_014170, MBF8419393.1	MA-13_genebank.gb_genome (77415/14/1)	gene	TIGR04086 family membrane protein
E2E33_014175	E2E33_014175, MBF8419394.1, yajC	MA-13_genebank.gb_genome (77415/14/1)	gene	preprotein translocase subunit YajC
E2E33_014185	2.4.99.17, E2E33_014185, MBF8419396.1, queA	MA-13_genebank.gb_genome (77415/14/1)	gene	tRNA preQ1(34) S-adenosylmethionine ribosyltransferase-isomerase QueA
E2E33_014190	E2E33_014190, MBF8419397.1	MA-13_genebank.gb_genome (77415/14/1)	gene	DUF2905 domain-containing protein
E2E33_014195	3.6.4.12, E2E33_014195, MBF8419398.1, ruvB	MA-13_genebank.gb_genome (77415/14/1)	gene	Holliday junction branch migration DNA helicase RuvB
E2E33_014200	3.6.4.12, E2E33_014200, MBF8419399.1, ruvA	MA-13_genebank.gb_genome (77415/14/1)	gene	Holliday junction branch migration protein RuvA
E2E33_014205	E2E33_014205, MBF8419400.1	MA-13_genebank.gb_genome (77415/14/1)	gene	YebC/PmpR family DNA-binding transcriptional regulator
E2E33_014215	E2E33_014215, MBF8419402.1, safA	MA-13_genebank.gb_genome (77415/14/1)	gene	SafA/ExsA family spore coat assembly protein
E2E33_014220	E2E33_014220, MBF8419403.1	MA-13_genebank.gb_genome (77415/14/1)	gene	transcription repressor NadR
E2E33_014230	E2E33_014230, MBF8419405.1	MA-13_genebank.gb_genome (77415/14/1)	gene	ACT domain-containing protein
E2E33_014235	E2E33_014235, MBF8419406.1, obgE	MA-13_genebank.gb_genome (77415/14/1)	gene	GTPase ObgE
E2E33_014240	E2E33_014240, MBF8419407.1	MA-13_genebank.gb_genome (77415/14/1)	gene	Spo0B domain-containing protein
E2E33_014245	E2E33_014245, MBF8419408.1, rpmA	MA-13_genebank.gb_genome (77415/14/1)	gene	50S ribosomal protein L27
E2E33_014250	E2E33_014250, MBF8419409.1	MA-13_genebank.gb_genome (77415/14/1)	gene	ribosomal-processing cysteine protease Prp
E2E33_014255	E2E33_014255, MBF8419410.1, rplU	MA-13_genebank.gb_genome (77415/14/1)	gene	50S ribosomal protein L21
E2E33_014260	E2E33_014260, MBF8419411.1	MA-13_genebank.gb_genome (77415/14/1)	gene	Rne/Rng family ribonuclease
E2E33_014265	E2E33_014265, MBF8419412.1	MA-13_genebank.gb_genome (77415/14/1)	gene	M50 family metallopeptidase
E2E33_014270	E2E33_014270, MBF8419413.1	MA-13_genebank.gb_genome (77415/14/1)	gene	M23 family metallopeptidase
E2E33_014275	E2E33_014275, MBF8419414.1, minD	MA-13_genebank.gb_genome (77415/14/1)	gene	septum site-determining protein MinD
E2E33_014280	E2E33_014280, MBF8419415.1, minC	MA-13_genebank.gb_genome (77415/14/1)	gene	septum site-determining protein MinC
E2E33_014285	E2E33_014285, MBF8419416.1, mreD	MA-13_genebank.gb_genome (77415/14/1)	gene	rod shape-determining protein MreD
E2E33_014290	E2E33_014290, MBF8419417.1, mreC	MA-13_genebank.gb_genome (77415/14/1)	gene	rod shape-determining protein MreC
E2E33_014300	E2E33_014300, MBF8419419.1, radC	MA-13_genebank.gb_genome (77415/14/1)	gene	DNA repair protein RadC
E2E33_014305	E2E33_014305, MBF8419420.1	MA-13_genebank.gb_genome (77415/14/1)	gene	hypothetical protein
E2E33_014310	E2E33_014310, MBF8419421.1	MA-13_genebank.gb_genome (77415/14/1)	gene	prepilin peptidase
E2E33_014315	E2E33_014315, MBF8419422.1, pilO	MA-13_genebank.gb_genome (77415/14/1)	gene	type 4a pilus biogenesis protein PilO
E2E33_014320	E2E33_014320, MBF8419423.1	MA-13_genebank.gb_genome (77415/14/1)	gene	fimbrial protein
E2E33_014325	E2E33_014325, MBF8419424.1, pilM	MA-13_genebank.gb_genome (77415/14/1)	gene	pilus assembly protein PilM
E2E33_014330	E2E33_014330, MBF8419425.1	MA-13_genebank.gb_genome (77415/14/1)	gene	prepilin-type N-terminal cleavage/methylation domain-containing protein
E2E33_014335	E2E33_014335, MBF8419426.1	MA-13_genebank.gb_genome (77415/14/1)	gene	type II secretion system F family protein
E2E33_014340	E2E33_014340, MBF8419427.1	MA-13_genebank.gb_genome (77415/14/1)	gene	type IV pilus twitching motility protein PilT
E2E33_014345	E2E33_014345, MBF8419428.1, tadA	MA-13_genebank.gb_genome (77415/14/1)	gene	Flp pilus assembly complex ATPase component TadA
E2E33_014350	E2E33_014350, MBF8419429.1	MA-13_genebank.gb_genome (77415/14/1)	gene	VanW family protein
E2E33_014355	E2E33_014355, MBF8419430.1	MA-13_genebank.gb_genome (77415/14/1)	gene	PRC-barrel domain-containing protein
E2E33_014360	E2E33_014360, MBF8419431.1	MA-13_genebank.gb_genome (77415/14/1)	gene	hypothetical protein
E2E33_014365	E2E33_014365, MBF8419432.1	MA-13_genebank.gb_genome (77415/14/1)	gene	hypothetical protein
E2E33_014370	E2E33_014370, MBF8419433.1	MA-13_genebank.gb_genome (77415/14/1)	gene	type II secretion system protein
E2E33_014380	E2E33_014380, MBF8419435.1	MA-13_genebank.gb_genome (77415/14/1)	gene	bifunctional folylpolyglutamate synthase/dihydrofolate synthase
E2E33_014385	6.1.1.9, E2E33_014385, MBF8419436.1	MA-13_genebank.gb_genome (77415/14/1)	gene	valine--tRNA ligase
E2E33_014390	E2E33_014390, MBF8419437.1	MA-13_genebank.gb_genome (77415/14/1)	gene	hypothetical protein
E2E33_014395	E2E33_014395, MBF8419438.1, ysxE	MA-13_genebank.gb_genome (77415/14/1)	gene	spore coat protein YsxE
E2E33_014400	E2E33_014400, MBF8419439.1	MA-13_genebank.gb_genome (77415/14/1)	gene	LysM peptidoglycan-binding domain-containing protein
E2E33_014405	5.4.3.8, E2E33_014405, MBF8419440.1, hemL	MA-13_genebank.gb_genome (77415/14/1)	gene	glutamate-1-semialdehyde 2,1-aminomutase
E2E33_014410	4.2.1.24, E2E33_014410, MBF8419441.1, hemB	MA-13_genebank.gb_genome (77415/14/1)	gene	porphobilinogen synthase
E2E33_014415	E2E33_014415, MBF8419442.1	MA-13_genebank.gb_genome (77415/14/1)	gene	uroporphyrinogen-III synthase
E2E33_014420	2.5.1.61, E2E33_014420, MBF8419443.1, hemC	MA-13_genebank.gb_genome (77415/14/1)	gene	hydroxymethylbilane synthase
E2E33_014425	E2E33_014425, MBF8419444.1, ccsA	MA-13_genebank.gb_genome (77415/14/1)	gene	cytochrome c biogenesis protein CcsA
E2E33_014430	1.2.1.70, E2E33_014430, MBF8419445.1	MA-13_genebank.gb_genome (77415/14/1)	gene	glutamyl-tRNA reductase
E2E33_014435	E2E33_014435, MBF8419446.1	MA-13_genebank.gb_genome (77415/14/1)	gene	hypothetical protein
E2E33_014440	E2E33_014440, MBF8419447.1	MA-13_genebank.gb_genome (77415/14/1)	gene	YihA family ribosome biogenesis GTP-binding protein
E2E33_014445	3.4.21.53, E2E33_014445, MBF8419448.1, lon	MA-13_genebank.gb_genome (77415/14/1)	gene	endopeptidase La
E2E33_014450	E2E33_014450, MBF8419449.1, lonB	MA-13_genebank.gb_genome (77415/14/1)	gene	ATP-dependent protease LonB
E2E33_014455	E2E33_014455, MBF8419450.1, clpX	MA-13_genebank.gb_genome (77415/14/1)	gene	ATP-dependent protease ATP-binding subunit ClpX
E2E33_014460	5.2.1.8, E2E33_014460, MBF8419451.1	MA-13_genebank.gb_genome (77415/14/1)	gene	trigger factor
E2E33_014465	E2E33_014465, MBF8419452.1	MA-13_genebank.gb_genome (77415/14/1)	gene	tetratricopeptide repeat protein
E2E33_014470	E2E33_014470	MA-13_genebank.gb_genome (77415/14/1)	gene	KpsF/GutQ family sugar-phosphate isomerase
E2E33_014475	E2E33_014475, MBF8419453.1	MA-13_genebank.gb_genome (77415/14/1)	gene	methionine biosynthesis PLP-dependent protein
E2E33_014480	E2E33_014480, MBF8419454.1, metC	MA-13_genebank.gb_genome (77415/14/1)	gene	cystathionine beta-lyase
E2E33_014510	E2E33_014510, MBF8419460.1	MA-13_genebank.gb_genome (77415/14/1)	gene	WecB/TagA/CpsF family glycosyltransferase
E2E33_014530	E2E33_014530, MBF8419464.1	MA-13_genebank.gb_genome (77415/14/1)	gene	phospho-sugar mutase
E2E33_014535	E2E33_014535, MBF8419465.1	MA-13_genebank.gb_genome (77415/14/1)	gene	peptidase S8 and S53 subtilisin kexin sedolisin
E2E33_014540	E2E33_014540, MBF8419466.1, vanZ	MA-13_genebank.gb_genome (77415/14/1)	gene	VanZ family protein
E2E33_014545	E2E33_014545, MBF8419467.1, tagH	MA-13_genebank.gb_genome (77415/14/1)	gene	teichoic acids export ABC transporter ATP-binding subunit TagH
E2E33_014555	E2E33_014555, MBF8419469.1, qoxD	MA-13_genebank.gb_genome (77415/14/1)	gene	cytochrome aa3 quinol oxidase subunit IV
E2E33_014560	E2E33_014560, MBF8419470.1, qoxC	MA-13_genebank.gb_genome (77415/14/1)	gene	cytochrome aa3 quinol oxidase subunit III
E2E33_014565	E2E33_014565, MBF8419471.1, qoxB	MA-13_genebank.gb_genome (77415/14/1)	gene	cytochrome aa3 quinol oxidase subunit I
E2E33_014570	E2E33_014570, MBF8419472.1, qoxA	MA-13_genebank.gb_genome (77415/14/1)	gene	cytochrome aa3 quinol oxidase subunit II
E2E33_014580	E2E33_014580, MBF8419474.1	MA-13_genebank.gb_genome (77415/14/1)	gene	LCP family protein
E2E33_014595	E2E33_014595, MBF8419476.1	MA-13_genebank.gb_genome (77415/14/1)	gene	glycoside hydrolase family 65 protein
E2E33_014630	1.1.1.27, E2E33_014630, MBF8419482.1	MA-13_genebank.gb_genome (77415/14/1)	gene	L-lactate dehydrogenase
E2E33_014650	E2E33_014650, MBF8419485.1	MA-13_genebank.gb_genome (77415/14/1)	gene	YhgE/Pip domain-containing protein
E2E33_014655	E2E33_014655, MBF8419486.1	MA-13_genebank.gb_genome (77415/14/1)	gene	MTH1187 family thiamine-binding protein
E2E33_014660	E2E33_014660, MBF8419487.1	MA-13_genebank.gb_genome (77415/14/1)	gene	lactonase family protein
E2E33_014665	E2E33_014665, MBF8419488.1	MA-13_genebank.gb_genome (77415/14/1)	gene	GTP-binding protein

## Sheet: singleton
Feature Id	Aliases	Genome	Type	Function
E2E33_000085	E2E33_000085, MBF8416808.1	MA-13_genebank.gb_genome (77415/14/1)	gene	helix-turn-helix domain-containing protein
E2E33_000090	E2E33_000090, MBF8416809.1	MA-13_genebank.gb_genome (77415/14/1)	gene	ribbon-helix-helix protein, CopG family
E2E33_000145	E2E33_000145, MBF8416817.1	MA-13_genebank.gb_genome (77415/14/1)	gene	hypothetical protein
E2E33_000150	E2E33_000150, MBF8416818.1	MA-13_genebank.gb_genome (77415/14/1)	gene	hypothetical protein
E2E33_000230	E2E33_000230, MBF8416833.1	MA-13_genebank.gb_genome (77415/14/1)	gene	transposase
E2E33_000405	E2E33_000405, MBF8416863.1	MA-13_genebank.gb_genome (77415/14/1)	gene	glycosyltransferase family 2 protein
E2E33_000560	E2E33_000560, MBF8416892.1	MA-13_genebank.gb_genome (77415/14/1)	gene	YjcZ family sporulation protein
E2E33_000640	E2E33_000640, MBF8416906.1	MA-13_genebank.gb_genome (77415/14/1)	gene	helix-turn-helix domain-containing protein
E2E33_000645	E2E33_000645, MBF8416907.1	MA-13_genebank.gb_genome (77415/14/1)	gene	ribbon-helix-helix protein, CopG family
E2E33_000970	E2E33_000970, MBF8416962.1	MA-13_genebank.gb_genome (77415/14/1)	gene	ISLre2-like element ISBco6 family transposase
E2E33_001035	E2E33_001035, MBF8416974.1	MA-13_genebank.gb_genome (77415/14/1)	gene	SEC-C domain-containing protein
E2E33_001210	E2E33_001210, MBF8417005.1	MA-13_genebank.gb_genome (77415/14/1)	gene	hypothetical protein
E2E33_001215	E2E33_001215, MBF8417006.1	MA-13_genebank.gb_genome (77415/14/1)	gene	DUF3986 family protein
E2E33_001340	E2E33_001340, MBF8417031.1	MA-13_genebank.gb_genome (77415/14/1)	gene	histidine kinase
E2E33_001695	E2E33_001695, MBF8417101.1	MA-13_genebank.gb_genome (77415/14/1)	gene	hypothetical protein
E2E33_001805	E2E33_001805, MBF8417119.1	MA-13_genebank.gb_genome (77415/14/1)	gene	hypothetical protein
E2E33_002205	E2E33_002205, MBF8417190.1	MA-13_genebank.gb_genome (77415/14/1)	gene	transposase
E2E33_002265	E2E33_002265, MBF8417201.1	MA-13_genebank.gb_genome (77415/14/1)	gene	IS5/IS1182 family transposase
E2E33_002400	E2E33_002400, MBF8417225.1	MA-13_genebank.gb_genome (77415/14/1)	gene	hypothetical protein
E2E33_002405	E2E33_002405, MBF8417226.1	MA-13_genebank.gb_genome (77415/14/1)	gene	permease
E2E33_002410	E2E33_002410, MBF8417227.1	MA-13_genebank.gb_genome (77415/14/1)	gene	ABC transporter permease
E2E33_002520	E2E33_002520, MBF8417245.1	MA-13_genebank.gb_genome (77415/14/1)	gene	SIR2 family protein
E2E33_002575	E2E33_002575, MBF8417254.1	MA-13_genebank.gb_genome (77415/14/1)	gene	hypothetical protein
E2E33_002580	E2E33_002580, MBF8417255.1	MA-13_genebank.gb_genome (77415/14/1)	gene	hypothetical protein
E2E33_003045	E2E33_003045, MBF8417342.1	MA-13_genebank.gb_genome (77415/14/1)	gene	hypothetical protein
E2E33_003350	E2E33_003350, MBF8417400.1	MA-13_genebank.gb_genome (77415/14/1)	gene	YuzL family protein
E2E33_003380	E2E33_003380, MBF8417406.1	MA-13_genebank.gb_genome (77415/14/1)	gene	lmo0937 family membrane protein
E2E33_003505	E2E33_003505, MBF8417430.1	MA-13_genebank.gb_genome (77415/14/1)	gene	YjcZ family sporulation protein
E2E33_003590	E2E33_003590, MBF8417447.1, mciZ	MA-13_genebank.gb_genome (77415/14/1)	gene	Z-ring formation inhibitor MciZ
E2E33_003615	E2E33_003615, MBF8417452.1	MA-13_genebank.gb_genome (77415/14/1)	gene	glycosyltransferase family 39 protein
E2E33_003685	E2E33_003685, MBF8417466.1	MA-13_genebank.gb_genome (77415/14/1)	gene	transposase
E2E33_003785	E2E33_003785, MBF8417484.1	MA-13_genebank.gb_genome (77415/14/1)	gene	plasmid recombination protein
E2E33_004165	E2E33_004165, MBF8417554.1	MA-13_genebank.gb_genome (77415/14/1)	gene	hypothetical protein
E2E33_004530	E2E33_004530	MA-13_genebank.gb_genome (77415/14/1)	gene	transposase
E2E33_004535	E2E33_004535, MBF8417624.1	MA-13_genebank.gb_genome (77415/14/1)	gene	hypothetical protein
E2E33_004575	E2E33_004575, MBF8417632.1, rpmH	MA-13_genebank.gb_genome (77415/14/1)	gene	50S ribosomal protein L34
E2E33_004740	E2E33_004740, MBF8417663.1	MA-13_genebank.gb_genome (77415/14/1)	gene	hypothetical protein
E2E33_004755	E2E33_004755, MBF8417666.1	MA-13_genebank.gb_genome (77415/14/1)	gene	YfhE family protein
E2E33_004885	E2E33_004885, MBF8417690.1	MA-13_genebank.gb_genome (77415/14/1)	gene	hypothetical protein
E2E33_004895	E2E33_004895, MBF8417692.1	MA-13_genebank.gb_genome (77415/14/1)	gene	hypothetical protein
E2E33_004930	E2E33_004930, MBF8417698.1	MA-13_genebank.gb_genome (77415/14/1)	gene	hypothetical protein
E2E33_004980	E2E33_004980, MBF8417708.1	MA-13_genebank.gb_genome (77415/14/1)	gene	hypothetical protein
E2E33_004990	E2E33_004990, MBF8417710.1	MA-13_genebank.gb_genome (77415/14/1)	gene	GapA-binding peptide SR1P
E2E33_005030	E2E33_005030, MBF8417718.1	MA-13_genebank.gb_genome (77415/14/1)	gene	YhfH family protein
E2E33_005240	E2E33_005240, MBF8417758.1	MA-13_genebank.gb_genome (77415/14/1)	gene	transposase
E2E33_005355	E2E33_005355, MBF8417774.1	MA-13_genebank.gb_genome (77415/14/1)	gene	YjcZ family sporulation protein
E2E33_005360	E2E33_005360, MBF8417775.1	MA-13_genebank.gb_genome (77415/14/1)	gene	hypothetical protein
E2E33_005400	E2E33_005400, MBF8417780.1	MA-13_genebank.gb_genome (77415/14/1)	gene	transposase
E2E33_005630	E2E33_005630, MBF8417822.1	MA-13_genebank.gb_genome (77415/14/1)	gene	YpzG family protein
E2E33_005780	E2E33_005780, MBF8417850.1	MA-13_genebank.gb_genome (77415/14/1)	gene	hypothetical protein
E2E33_005795	E2E33_005795, MBF8417853.1	MA-13_genebank.gb_genome (77415/14/1)	gene	YjcZ family sporulation protein
E2E33_005845	3.5.1.4, E2E33_005845, MBF8417863.1	MA-13_genebank.gb_genome (77415/14/1)	gene	amidase
E2E33_006045	E2E33_006045, MBF8417900.1	MA-13_genebank.gb_genome (77415/14/1)	gene	AbrB/MazE/SpoVT family DNA-binding domain-containing protein
E2E33_006050	E2E33_006050, MBF8417901.1	MA-13_genebank.gb_genome (77415/14/1)	gene	type II toxin-antitoxin system PemK/MazF family toxin
E2E33_006080	E2E33_006080, MBF8417907.1	MA-13_genebank.gb_genome (77415/14/1)	gene	DUF5626 family protein
E2E33_006090	E2E33_006090, MBF8417908.1	MA-13_genebank.gb_genome (77415/14/1)	gene	hypothetical protein
E2E33_006140	E2E33_006140, MBF8417917.1	MA-13_genebank.gb_genome (77415/14/1)	gene	Rpn family recombination-promoting nuclease/putative transposase
E2E33_006180	E2E33_006180, MBF8417925.1, sspL	MA-13_genebank.gb_genome (77415/14/1)	gene	small, acid-soluble spore protein L
E2E33_006355	E2E33_006355, MBF8417959.1, rpmJ	MA-13_genebank.gb_genome (77415/14/1)	gene	50S ribosomal protein L36
E2E33_006550	E2E33_006550, MBF8417998.1, rpmG	MA-13_genebank.gb_genome (77415/14/1)	gene	50S ribosomal protein L33
E2E33_006650	E2E33_006650	MA-13_genebank.gb_genome (77415/14/1)	gene	SagB family peptide dehydrogenase
E2E33_007150	E2E33_007150, MBF8418103.1	MA-13_genebank.gb_genome (77415/14/1)	gene	IS607 family transposase
E2E33_007310	E2E33_007310, MBF8418134.1	MA-13_genebank.gb_genome (77415/14/1)	gene	hypothetical protein
E2E33_007335	E2E33_007335, MBF8418139.1	MA-13_genebank.gb_genome (77415/14/1)	gene	hypothetical protein
E2E33_007415	E2E33_007415, MBF8418155.1	MA-13_genebank.gb_genome (77415/14/1)	gene	YrzQ family protein
E2E33_007485	E2E33_007485, MBF8418169.1	MA-13_genebank.gb_genome (77415/14/1)	gene	YrzI family small protein
E2E33_007510	E2E33_007510, MBF8418174.1	MA-13_genebank.gb_genome (77415/14/1)	gene	sporulation histidine kinase inhibitor Sda
E2E33_007890	E2E33_007890, MBF8418248.1	MA-13_genebank.gb_genome (77415/14/1)	gene	hypothetical protein
E2E33_007960	E2E33_007960, MBF8418262.1	MA-13_genebank.gb_genome (77415/14/1)	gene	small acid-soluble spore protein P
E2E33_007975	E2E33_007975, MBF8418265.1	MA-13_genebank.gb_genome (77415/14/1)	gene	small acid-soluble spore protein O
E2E33_007985	E2E33_007985, MBF8418267.1	MA-13_genebank.gb_genome (77415/14/1)	gene	FbpB family small basic protein
E2E33_007990	E2E33_007990, MBF8418268.1	MA-13_genebank.gb_genome (77415/14/1)	gene	acid-soluble spore protein N
E2E33_008060	E2E33_008060, MBF8418280.1	MA-13_genebank.gb_genome (77415/14/1)	gene	DUF4023 domain-containing protein
E2E33_008065	E2E33_008065, MBF8418281.1	MA-13_genebank.gb_genome (77415/14/1)	gene	hypothetical protein
E2E33_008185	E2E33_008185, MBF8418305.1	MA-13_genebank.gb_genome (77415/14/1)	gene	YpzI family protein
E2E33_008425	E2E33_008425, MBF8418353.1	MA-13_genebank.gb_genome (77415/14/1)	gene	spore protein
E2E33_008625	E2E33_008625, MBF8418392.1	MA-13_genebank.gb_genome (77415/14/1)	gene	YhfH family protein
E2E33_008740	E2E33_008740, MBF8418411.1	MA-13_genebank.gb_genome (77415/14/1)	gene	YjcZ family sporulation protein
E2E33_008880	E2E33_008880, MBF8418439.1	MA-13_genebank.gb_genome (77415/14/1)	gene	hypothetical protein
E2E33_008885	E2E33_008885, MBF8418440.1	MA-13_genebank.gb_genome (77415/14/1)	gene	hypothetical protein
E2E33_009020	E2E33_009020, MBF8418463.1	MA-13_genebank.gb_genome (77415/14/1)	gene	hypothetical protein
E2E33_009145	E2E33_009145, MBF8418485.1	MA-13_genebank.gb_genome (77415/14/1)	gene	C40 family peptidase
E2E33_009165	E2E33_009165, MBF8418487.1	MA-13_genebank.gb_genome (77415/14/1)	gene	hypothetical protein
E2E33_009355	E2E33_009355, MBF8418504.1	MA-13_genebank.gb_genome (77415/14/1)	gene	DUF1540 domain-containing protein
E2E33_009365	E2E33_009365, MBF8418506.1	MA-13_genebank.gb_genome (77415/14/1)	gene	DUF4021 domain-containing protein
E2E33_009475	E2E33_009475, MBF8418528.1	MA-13_genebank.gb_genome (77415/14/1)	gene	hypothetical protein
E2E33_009505	E2E33_009505, MBF8418534.1	MA-13_genebank.gb_genome (77415/14/1)	gene	hypothetical protein
E2E33_009645	E2E33_009645, MBF8418561.1	MA-13_genebank.gb_genome (77415/14/1)	gene	aspartate/glutamate racemase family protein
E2E33_009755	E2E33_009755, MBF8418582.1, spoVM	MA-13_genebank.gb_genome (77415/14/1)	gene	stage V sporulation protein SpoVM
E2E33_010600	E2E33_010600, MBF8418740.1	MA-13_genebank.gb_genome (77415/14/1)	gene	transposase
E2E33_010635	E2E33_010635, MBF8418746.1, tnpA	MA-13_genebank.gb_genome (77415/14/1)	gene	IS200/IS605 family transposase
E2E33_010640	E2E33_010640, MBF8418747.1	MA-13_genebank.gb_genome (77415/14/1)	gene	hypothetical protein
E2E33_010780	E2E33_010780, MBF8418767.1	MA-13_genebank.gb_genome (77415/14/1)	gene	hypothetical protein
E2E33_010840	E2E33_010840, MBF8418779.1	MA-13_genebank.gb_genome (77415/14/1)	gene	hypothetical protein
E2E33_010900	E2E33_010900, MBF8418789.1	MA-13_genebank.gb_genome (77415/14/1)	gene	hypothetical protein
E2E33_010945	E2E33_010945, MBF8418797.1	MA-13_genebank.gb_genome (77415/14/1)	gene	YvrJ family protein
E2E33_011150	E2E33_011150, MBF8418817.1	MA-13_genebank.gb_genome (77415/14/1)	gene	helix-turn-helix domain-containing protein
E2E33_011155	E2E33_011155, MBF8418818.1	MA-13_genebank.gb_genome (77415/14/1)	gene	hypothetical protein
E2E33_011200	E2E33_011200, MBF8418826.1	MA-13_genebank.gb_genome (77415/14/1)	gene	hypothetical protein
E2E33_011220	E2E33_011220, MBF8418829.1	MA-13_genebank.gb_genome (77415/14/1)	gene	YjcZ family sporulation protein
E2E33_011315	E2E33_011315, MBF8418848.1	MA-13_genebank.gb_genome (77415/14/1)	gene	hypothetical protein
E2E33_011470	E2E33_011470, MBF8418878.1	MA-13_genebank.gb_genome (77415/14/1)	gene	hypothetical protein
E2E33_011670	E2E33_011670, MBF8418914.1	MA-13_genebank.gb_genome (77415/14/1)	gene	ImmA/IrrE family metallo-endopeptidase
E2E33_011675	E2E33_011675, MBF8418915.1	MA-13_genebank.gb_genome (77415/14/1)	gene	XRE family transcriptional regulator
E2E33_011680	E2E33_011680, MBF8418916.1	MA-13_genebank.gb_genome (77415/14/1)	gene	XRE family transcriptional regulator
E2E33_011685	E2E33_011685, MBF8418917.1	MA-13_genebank.gb_genome (77415/14/1)	gene	hypothetical protein
E2E33_011690	E2E33_011690, MBF8418918.1	MA-13_genebank.gb_genome (77415/14/1)	gene	hypothetical protein
E2E33_011695	E2E33_011695, MBF8418919.1	MA-13_genebank.gb_genome (77415/14/1)	gene	hypothetical protein
E2E33_011700	E2E33_011700, MBF8418920.1	MA-13_genebank.gb_genome (77415/14/1)	gene	hypothetical protein
E2E33_011705	E2E33_011705, MBF8418921.1	MA-13_genebank.gb_genome (77415/14/1)	gene	ATP-dependent helicase
E2E33_011710	E2E33_011710, MBF8418922.1	MA-13_genebank.gb_genome (77415/14/1)	gene	hypothetical protein
E2E33_011715	E2E33_011715, MBF8418923.1	MA-13_genebank.gb_genome (77415/14/1)	gene	hypothetical protein
E2E33_011720	E2E33_011720, MBF8418924.1	MA-13_genebank.gb_genome (77415/14/1)	gene	VRR-NUC domain-containing protein
E2E33_011725	E2E33_011725, MBF8418925.1	MA-13_genebank.gb_genome (77415/14/1)	gene	AAA family ATPase
E2E33_011730	E2E33_011730, MBF8418926.1	MA-13_genebank.gb_genome (77415/14/1)	gene	hypothetical protein
E2E33_011735	E2E33_011735, MBF8418927.1	MA-13_genebank.gb_genome (77415/14/1)	gene	DUF669 domain-containing protein
E2E33_011740	E2E33_011740, MBF8418928.1	MA-13_genebank.gb_genome (77415/14/1)	gene	hypothetical protein
E2E33_011745	E2E33_011745, MBF8418929.1	MA-13_genebank.gb_genome (77415/14/1)	gene	hypothetical protein
E2E33_011750	E2E33_011750, MBF8418930.1	MA-13_genebank.gb_genome (77415/14/1)	gene	hypothetical protein
E2E33_011755	E2E33_011755, MBF8418931.1	MA-13_genebank.gb_genome (77415/14/1)	gene	HNH endonuclease
E2E33_011760	E2E33_011760, MBF8418932.1	MA-13_genebank.gb_genome (77415/14/1)	gene	hypothetical protein
E2E33_011765	E2E33_011765, MBF8418933.1	MA-13_genebank.gb_genome (77415/14/1)	gene	hypothetical protein
E2E33_011775	E2E33_011775, MBF8418935.1	MA-13_genebank.gb_genome (77415/14/1)	gene	DUF1492 domain-containing protein
E2E33_011780	E2E33_011780, MBF8418936.1	MA-13_genebank.gb_genome (77415/14/1)	gene	hypothetical protein
E2E33_011785	E2E33_011785, MBF8418937.1	MA-13_genebank.gb_genome (77415/14/1)	gene	HNH endonuclease
E2E33_011790	E2E33_011790, MBF8418938.1	MA-13_genebank.gb_genome (77415/14/1)	gene	P27 family phage terminase small subunit
E2E33_011795	E2E33_011795, MBF8418939.1	MA-13_genebank.gb_genome (77415/14/1)	gene	terminase large subunit
E2E33_011800	E2E33_011800, MBF8418940.1	MA-13_genebank.gb_genome (77415/14/1)	gene	hypothetical protein
E2E33_011805	E2E33_011805, MBF8418941.1	MA-13_genebank.gb_genome (77415/14/1)	gene	phage portal protein
E2E33_011810	E2E33_011810, MBF8418942.1	MA-13_genebank.gb_genome (77415/14/1)	gene	HK97 family phage prohead protease
E2E33_011815	E2E33_011815, MBF8418943.1	MA-13_genebank.gb_genome (77415/14/1)	gene	phage major capsid protein
E2E33_011820	E2E33_011820, MBF8418944.1	MA-13_genebank.gb_genome (77415/14/1)	gene	phage gp6-like head-tail connector protein
E2E33_011825	E2E33_011825, MBF8418945.1	MA-13_genebank.gb_genome (77415/14/1)	gene	hypothetical protein
E2E33_011830	E2E33_011830, MBF8418946.1	MA-13_genebank.gb_genome (77415/14/1)	gene	hypothetical protein
E2E33_011835	E2E33_011835, MBF8418947.1	MA-13_genebank.gb_genome (77415/14/1)	gene	HK97 gp10 family phage protein
E2E33_011840	E2E33_011840, MBF8418948.1	MA-13_genebank.gb_genome (77415/14/1)	gene	phage tail protein
E2E33_011845	E2E33_011845, MBF8418949.1	MA-13_genebank.gb_genome (77415/14/1)	gene	hypothetical protein
E2E33_011850	E2E33_011850, MBF8418950.1	MA-13_genebank.gb_genome (77415/14/1)	gene	phage tail tape measure protein
E2E33_011855	E2E33_011855, MBF8418951.1	MA-13_genebank.gb_genome (77415/14/1)	gene	phage tail family protein
E2E33_011860	E2E33_011860, MBF8418952.1	MA-13_genebank.gb_genome (77415/14/1)	gene	phage tail protein
E2E33_011865	E2E33_011865, MBF8418953.1	MA-13_genebank.gb_genome (77415/14/1)	gene	hypothetical protein
E2E33_011870	E2E33_011870, MBF8418954.1	MA-13_genebank.gb_genome (77415/14/1)	gene	hypothetical protein
E2E33_011875	E2E33_011875, MBF8418955.1	MA-13_genebank.gb_genome (77415/14/1)	gene	hypothetical protein
E2E33_011880	E2E33_011880, MBF8418956.1	MA-13_genebank.gb_genome (77415/14/1)	gene	phage holin family protein
E2E33_011885	E2E33_011885, MBF8418957.1	MA-13_genebank.gb_genome (77415/14/1)	gene	M15 family metallopeptidase
E2E33_011890	E2E33_011890, MBF8418958.1	MA-13_genebank.gb_genome (77415/14/1)	gene	DUF4190 domain-containing protein
E2E33_012270	E2E33_012270, MBF8419034.1	MA-13_genebank.gb_genome (77415/14/1)	gene	YqzM family protein
E2E33_012540	E2E33_012540, MBF8419085.1	MA-13_genebank.gb_genome (77415/14/1)	gene	hypothetical protein
E2E33_012640	E2E33_012640, MBF8419104.1	MA-13_genebank.gb_genome (77415/14/1)	gene	hypothetical protein
E2E33_012650	E2E33_012650, MBF8419106.1	MA-13_genebank.gb_genome (77415/14/1)	gene	hypothetical protein
E2E33_012665	E2E33_012665, MBF8419109.1	MA-13_genebank.gb_genome (77415/14/1)	gene	SMI1/KNR4 family protein
E2E33_012870	E2E33_012870, MBF8419148.1	MA-13_genebank.gb_genome (77415/14/1)	gene	hypothetical protein
E2E33_012965	E2E33_012965, MBF8419167.1, prli42	MA-13_genebank.gb_genome (77415/14/1)	gene	stressosome-associated protein Prli42
E2E33_013190	E2E33_013190, MBF8419208.1	MA-13_genebank.gb_genome (77415/14/1)	gene	FAD-dependent oxidoreductase
E2E33_013235	E2E33_013235, MBF8419217.1	MA-13_genebank.gb_genome (77415/14/1)	gene	YqzE family protein
E2E33_013295	E2E33_013295, MBF8419229.1	MA-13_genebank.gb_genome (77415/14/1)	gene	DUF2759 domain-containing protein
E2E33_013320	E2E33_013320, MBF8419234.1, rpmG	MA-13_genebank.gb_genome (77415/14/1)	gene	50S ribosomal protein L33
E2E33_013450	E2E33_013450, MBF8419260.1	MA-13_genebank.gb_genome (77415/14/1)	gene	YqzL family protein
E2E33_013505	E2E33_013505, MBF8419263.1, cmpA	MA-13_genebank.gb_genome (77415/14/1)	gene	cortex morphogenetic protein CmpA
E2E33_013675	E2E33_013675, MBF8419297.1	MA-13_genebank.gb_genome (77415/14/1)	gene	hypothetical protein
E2E33_013705	E2E33_013705, MBF8419302.1	MA-13_genebank.gb_genome (77415/14/1)	gene	hypothetical protein
E2E33_013845	E2E33_013845, MBF8419328.1	MA-13_genebank.gb_genome (77415/14/1)	gene	hypothetical protein
E2E33_013850	E2E33_013850, MBF8419329.1	MA-13_genebank.gb_genome (77415/14/1)	gene	hypothetical protein
E2E33_013855	E2E33_013855, MBF8419330.1	MA-13_genebank.gb_genome (77415/14/1)	gene	transposase
E2E33_013870	E2E33_013870, MBF8419333.1	MA-13_genebank.gb_genome (77415/14/1)	gene	hypothetical protein
E2E33_014150	E2E33_014150, MBF8419389.1, tnpA	MA-13_genebank.gb_genome (77415/14/1)	gene	IS200/IS605 family transposase
