# Supplementary material for: A Genomic Comparative Analysis of Bacillus Coagulans Unravels the Genetic Potential of MA-13 Strain for Biotechnological Applications
Source: Preprints.org preprint supplement (doi:10.20944/preprints202112.0372.v1), 2021-12-22
Supplement: Supplementary file 5 [file Table S4.xslx.xlsx]

## Sheet: Table S4.xslx
Tab. S4 Output of resistome analysis using Patric database
Evidence	Property	Source	Genome Name	PATRIC ID	RefSeq Locus Tag	Alt Locus Tag	Source ID	Source Organism	Gene	Product	Function	Classification	PubMed	Subject Coverage	Query Coverage	Identity	E-value
K-mer Search	Antibiotic Resistance	PATRIC	Bacillus coagulans 2-6	fig|941639.3.peg.2846		VBIBacCoa177709_2846				Lincosamide nucleotidyltransferase => Lnu(D)		antibiotic inactivation enzyme	18086844
FBA	Essential Gene	PATRIC	Bacillus coagulans 2-6	fig|941639.3.peg.131	BCO26_0118	VBIBacCoa177709_0131				SSU ribosomal protein S10p (S20e)	Essential gene, predicted using metabolic flux-balance analysis in LB media
K-mer Search	Antibiotic Resistance	PATRIC	Bacillus coagulans 2-6	fig|941639.3.peg.2742	BCO26_2328	VBIBacCoa177709_2742				Enoyl-[acyl-carrier-protein] reductase [NADPH] (EC 1.3.1.104), FabL		antibiotic target replacement protein	21185310
FBA	Essential Gene	PATRIC	Bacillus coagulans 2-6	fig|941639.3.peg.2438	BCO26_2066	VBIBacCoa177709_2438				S-adenosylmethionine synthetase (EC 2.5.1.6)	Essential gene, predicted using metabolic flux-balance analysis in LB media
BLASTP	Human Homolog	Human	Bacillus coagulans 2-6	fig|941639.3.peg.1740	BCO26_1447	VBIBacCoa177709_1740	NP_002622.2	Homo sapiens		6-phosphogluconate dehydrogenase, decarboxylating (EC 1.1.1.44)				97	99	57	0
FBA	Essential Gene	PATRIC	Bacillus coagulans 2-6	fig|941639.3.peg.1336	BCO26_1101	VBIBacCoa177709_1336				Chromosome partition protein smc	Essential gene, predicted using metabolic flux-balance analysis in LB media
FBA	Essential Gene	PATRIC	Bacillus coagulans 2-6	fig|941639.3.peg.1633	BCO26_1361	VBIBacCoa177709_1633				DNA topoisomerase IV subunit B (EC 5.99.1.3)	Essential gene, predicted using metabolic flux-balance analysis in LB media
FBA	Essential Gene	PATRIC	Bacillus coagulans 2-6	fig|941639.3.peg.1865	BCO26_1559	VBIBacCoa177709_1865				Heptaprenyl diphosphate synthase component I (EC 2.5.1.30)	Essential gene, predicted using metabolic flux-balance analysis in LB media
BLAT	Transporter	TCDB	Bacillus coagulans 2-6	fig|941639.3.peg.1983	BCO26_1666	VBIBacCoa177709_1983	P49780	Bacillus subtilis		Stage III sporulation protein AC	the multicomponent putative spoiiiae exporter (spoiiia-e) family.	9.B.70.1.1	1766372;19383706;8969508;9384377	98	100	83	8e-26
FBA	Essential Gene	PATRIC	Bacillus coagulans 2-6	fig|941639.3.peg.2788	BCO26_2365	VBIBacCoa177709_2788			ilvC	Ketol-acid reductoisomerase (NADP(+)) (EC 1.1.1.86)	Essential gene, predicted using metabolic flux-balance analysis in LB media
FBA	Essential Gene	PATRIC	Bacillus coagulans 2-6	fig|941639.3.peg.164	BCO26_0151	VBIBacCoa177709_0164			rpsI	SSU ribosomal protein S9p (S16e)	Essential gene, predicted using metabolic flux-balance analysis in LB media
FBA	Essential Gene	PATRIC	Bacillus coagulans 2-6	fig|941639.3.peg.2049	BCO26_1727	VBIBacCoa177709_2049			dnaG	DNA primase DnaG	Essential gene, predicted using metabolic flux-balance analysis in LB media
FBA	Essential Gene	PATRIC	Bacillus coagulans 2-6	fig|941639.3.peg.62	BCO26_0056	VBIBacCoa177709_0062			yacA	tRNA(Ile)-lysidine synthetase (EC 6.3.4.19)	Essential gene, predicted using metabolic flux-balance analysis in LB media
FBA	Essential Gene	PATRIC	Bacillus coagulans 2-6	fig|941639.3.peg.1003	BCO26_0817	VBIBacCoa177709_1003				3-oxoacyl-[acyl-carrier-protein] synthase, KASII (EC 2.3.1.179)	Essential gene, predicted using metabolic flux-balance analysis in LB media
FBA	Essential Gene	PATRIC	Bacillus coagulans 2-6	fig|941639.3.peg.1737	BCO26_1444	VBIBacCoa177709_1737				UDP-N-acetylenolpyruvoylglucosamine reductase (EC 1.3.1.98)	Essential gene, predicted using metabolic flux-balance analysis in LB media
FBA	Essential Gene	PATRIC	Bacillus coagulans 2-6	fig|941639.3.peg.1952	BCO26_1638	VBIBacCoa177709_1952				Branched-chain alpha-keto acid dehydrogenase, E1 component, beta subunit (EC 1.2.4.4)	Essential gene, predicted using metabolic flux-balance analysis in LB media
BLAT	Transporter	TCDB	Bacillus coagulans 2-6	fig|941639.3.peg.1848	BCO26_1543	VBIBacCoa177709_1848	P46912	Bacillus subtilis	qcrB	Menaquinone-cytochrome c reductase, cytochrome B subunit	the proton-translocating quinol:cytochrome c reductase (qcr) superfamily.	3.D.3.4.1	7592464;8760912;9384377;9535866	100	100	89	1e-119
FBA	Essential Gene	PATRIC	Bacillus coagulans 2-6	fig|941639.3.peg.144	BCO26_0131	VBIBacCoa177709_0144			rplE	LSU ribosomal protein L5p (L11e)	Essential gene, predicted using metabolic flux-balance analysis in LB media
FBA	Essential Gene	PATRIC	Bacillus coagulans 2-6	fig|941639.3.peg.2789	BCO26_2366	VBIBacCoa177709_2789			ilvH	Acetolactate synthase small subunit (EC 2.2.1.6)	Essential gene, predicted using metabolic flux-balance analysis in LB media
FBA	Essential Gene	PATRIC	Bacillus coagulans 2-6	fig|941639.3.peg.3490	BCO26_2949	VBIBacCoa177709_3490			purA	Adenylosuccinate synthetase (EC 6.3.4.4)	Essential gene, predicted using metabolic flux-balance analysis in LB media
FBA	Essential Gene	PATRIC	Bacillus coagulans 2-6	fig|941639.3.peg.1	BCO26_0001	VBIBacCoa177709_0001			dnaA	Chromosomal replication initiator protein DnaA	Essential gene, predicted using metabolic flux-balance analysis in LB media
FBA	Essential Gene	PATRIC	Bacillus coagulans 2-6	fig|941639.3.peg.2312	BCO26_1952	VBIBacCoa177709_2312				Helicase loader DnaI	Essential gene, predicted using metabolic flux-balance analysis in LB media
BLASTP	Human Homolog	Human	Bacillus coagulans 2-6	fig|941639.3.peg.3183	BCO26_2680	VBIBacCoa177709_3183	NP_005680.1	Homo sapiens	ywjA	Efflux ABC transporter, permease/ATP-binding protein YwjA				16	97	55	5e-45
FBA	Essential Gene	PATRIC	Bacillus coagulans 2-6	fig|941639.3.peg.2006	BCO26_1687	VBIBacCoa177709_2006			aroK	Shikimate kinase I (EC 2.7.1.71)	Essential gene, predicted using metabolic flux-balance analysis in LB media
FBA	Essential Gene	PATRIC	Bacillus coagulans 2-6	fig|941639.3.peg.1323	BCO26_1089	VBIBacCoa177709_1323			rpmB	LSU ribosomal protein L28p @ LSU ribosomal protein L28p, zinc-independent	Essential gene, predicted using metabolic flux-balance analysis in LB media
BLASTP	Human Homolog	Human	Bacillus coagulans 2-6	fig|941639.3.peg.3352	BCO26_2832	VBIBacCoa177709_3352	NP_000008.1	Homo sapiens		Acyl-CoA dehydrogenase, short-chain specific (EC 1.3.8.1)				91	98	52	3e-133
FBA	Essential Gene	PATRIC	Bacillus coagulans 2-6	fig|941639.3.peg.2305	BCO26_1946	VBIBacCoa177709_2305			rplT	LSU ribosomal protein L20p	Essential gene, predicted using metabolic flux-balance analysis in LB media
FBA	Essential Gene	PATRIC	Bacillus coagulans 2-6	fig|941639.3.peg.2091	BCO26_1764	VBIBacCoa177709_2091			aroE	Shikimate 5-dehydrogenase I alpha (EC 1.1.1.25)	Essential gene, predicted using metabolic flux-balance analysis in LB media
K-mer Search	Antibiotic Resistance	PATRIC	Bacillus coagulans 2-6	fig|941639.3.peg.68	BCO26_0062	VBIBacCoa177709_0068				Dihydropteroate synthase (EC 2.5.1.15)		antibiotic target in susceptible species	15673783
FBA	Essential Gene	PATRIC	Bacillus coagulans 2-6	fig|941639.3.peg.878	BCO26_0717	VBIBacCoa177709_0878			tagD	Glycerol-3-phosphate cytidylyltransferase (EC 2.7.7.39)	Essential gene, predicted using metabolic flux-balance analysis in LB media
FBA	Essential Gene	PATRIC	Bacillus coagulans 2-6	fig|941639.3.peg.882	BCO26_0719	VBIBacCoa177709_0882			tagF	CDP-glycerol:poly(glycerophosphate) glycerophosphotransferase (EC 2.7.8.12)	Essential gene, predicted using metabolic flux-balance analysis in LB media
BLAT	Virulence Factor	PATRIC_VF	Bacillus coagulans 2-6	fig|941639.3.peg.3490	BCO26_2949	VBIBacCoa177709_3490	lmo0055	Listeria monocytogenes EGD-e	purA	Adenylosuccinate synthetase (EC 6.3.4.4)		Intracellular survival and replication	20955543	99	99	83	1e-213
FBA	Essential Gene	PATRIC	Bacillus coagulans 2-6	fig|941639.3.peg.1968	BCO26_1652	VBIBacCoa177709_1968				(2E,6E)-farnesyl diphosphate synthase (EC 2.5.1.10)	Essential gene, predicted using metabolic flux-balance analysis in LB media
BLAT	Antibiotic Resistance	NDARO	Bacillus coagulans 2-6	fig|941639.3.peg.2846		VBIBacCoa177709_2846	WP_063851342.1	Streptococcus uberis		Lincosamide nucleotidyltransferase => Lnu(D)	MULTISPECIES: class A beta-lactamase TEM-156			25	97	90	5e-17
FBA	Essential Gene	PATRIC	Bacillus coagulans 2-6	fig|941639.3.peg.137	BCO26_0124	VBIBacCoa177709_0137			rplV	LSU ribosomal protein L22p (L17e)	Essential gene, predicted using metabolic flux-balance analysis in LB media
FBA	Essential Gene	PATRIC	Bacillus coagulans 2-6	fig|941639.3.peg.3225	BCO26_2718	VBIBacCoa177709_3225			nadE	NAD synthetase (EC 6.3.1.5)	Essential gene, predicted using metabolic flux-balance analysis in LB media
BLASTP	Human Homolog	Human	Bacillus coagulans 2-6	fig|941639.3.peg.3080	BCO26_2594	VBIBacCoa177709_3080	NP_001776.1	Homo sapiens		Cytidine deaminase (EC 3.5.4.5)				87	98	51	2e-37
FBA	Essential Gene	PATRIC	Bacillus coagulans 2-6	fig|941639.3.peg.2364	BCO26_2000	VBIBacCoa177709_2364			rpsD	SSU ribosomal protein S4p (S9e) @ SSU ribosomal protein S4p (S9e), zinc-independent	Essential gene, predicted using metabolic flux-balance analysis in LB media
FBA	Essential Gene	PATRIC	Bacillus coagulans 2-6	fig|941639.3.peg.1860	BCO26_1554	VBIBacCoa177709_1860				Chorismate synthase (EC 4.2.3.5)	Essential gene, predicted using metabolic flux-balance analysis in LB media
K-mer Search	Antibiotic Resistance	PATRIC	Bacillus coagulans 2-6	fig|941639.3.peg.1959	BCO26_1645	VBIBacCoa177709_1959				Glycerophosphoryl diester phosphodiesterase (EC 3.1.4.46)		protein altering cell wall charge conferring antibiotic resistance	21899450
FBA	Essential Gene	PATRIC	Bacillus coagulans 2-6	fig|941639.3.peg.132	BCO26_0119	VBIBacCoa177709_0132				LSU ribosomal protein L3p (L3e)	Essential gene, predicted using metabolic flux-balance analysis in LB media
BLASTP	Human Homolog	Human	Bacillus coagulans 2-6	fig|941639.3.peg.1862	BCO26_1556	VBIBacCoa177709_1862	NP_002504.2	Homo sapiens		Nucleoside diphosphate kinase (EC 2.7.4.6)				81	93	62	9e-62
K-mer Search	Antibiotic Resistance	PATRIC	Bacillus coagulans 2-6	fig|941639.3.peg.1593	BCO26_1325	VBIBacCoa177709_1593				Two-component sensor histidine kinase BceS		regulator modulating expression of antibiotic resistance genes	25118291
FBA	Essential Gene	PATRIC	Bacillus coagulans 2-6	fig|941639.3.peg.1426	BCO26_1183	VBIBacCoa177709_1426			rpsO	SSU ribosomal protein S15p (S13e)	Essential gene, predicted using metabolic flux-balance analysis in LB media
K-mer Search	Antibiotic Resistance	PATRIC	Bacillus coagulans 2-6	fig|941639.3.peg.3260	BCO26_2751	VBIBacCoa177709_3260				Alanine racemase (EC 5.1.1.1)		antibiotic target in susceptible species	19748470;24303782
FBA	Essential Gene	PATRIC	Bacillus coagulans 2-6	fig|941639.3.peg.1246	BCO26_1018	VBIBacCoa177709_1246			murD	UDP-N-acetylmuramoyl-L-alanine--D-glutamate ligase (EC 6.3.2.9)	Essential gene, predicted using metabolic flux-balance analysis in LB media
BLASTP	Human Homolog	Human	Bacillus coagulans 2-6	fig|941639.3.peg.2637	BCO26_2240	VBIBacCoa177709_2637	NP_002037.2	Homo sapiens		NAD-dependent glyceraldehyde-3-phosphate dehydrogenase (EC 1.2.1.12)				98	98	52	6e-118
FBA	Essential Gene	PATRIC	Bacillus coagulans 2-6	fig|941639.3.peg.371	BCO26_0312	VBIBacCoa177709_0371			yubB	Undecaprenyl-diphosphatase (EC 3.6.1.27)	Essential gene, predicted using metabolic flux-balance analysis in LB media
FBA	Essential Gene	PATRIC	Bacillus coagulans 2-6	fig|941639.3.peg.1229		VBIBacCoa177709_1229				LSU ribosomal protein L32p @ LSU ribosomal protein L32p, zinc-dependent	Essential gene, predicted using metabolic flux-balance analysis in LB media
FBA	Essential Gene	PATRIC	Bacillus coagulans 2-6	fig|941639.3.peg.2511	BCO26_2131	VBIBacCoa177709_2511			araB	Ribulokinase (EC 2.7.1.16)	Essential gene, predicted using metabolic flux-balance analysis in LB media
FBA	Essential Gene	PATRIC	Bacillus coagulans 2-6	fig|941639.3.peg.2	BCO26_0002	VBIBacCoa177709_0002			dnaN	DNA polymerase III beta subunit (EC 2.7.7.7)	Essential gene, predicted using metabolic flux-balance analysis in LB media
K-mer Search	Antibiotic Resistance	PATRIC	Bacillus coagulans 2-6	fig|941639.3.peg.260	BCO26_0228	VBIBacCoa177709_0260				Broad-specificity multidrug efflux pump YkkC		efflux pump conferring antibiotic resistance	10735877
FBA	Essential Gene	PATRIC	Bacillus coagulans 2-6	fig|941639.3.peg.1405	BCO26_1166	VBIBacCoa177709_1405			uppS	Undecaprenyl diphosphate synthase (EC 2.5.1.31)	Essential gene, predicted using metabolic flux-balance analysis in LB media
BLAT	Drug Target	TTD	Bacillus coagulans 2-6	fig|941639.3.peg.130	BCO26_0117	VBIBacCoa177709_0130	TTDI02058			Translation elongation factor Tu				98	98	85	1e-196
FBA	Essential Gene	PATRIC	Bacillus coagulans 2-6	fig|941639.3.peg.1863	BCO26_1557	VBIBacCoa177709_1863				Heptaprenyl diphosphate synthase component II (EC 2.5.1.30)	Essential gene, predicted using metabolic flux-balance analysis in LB media
BLASTP	Human Homolog	Human	Bacillus coagulans 2-6	fig|941639.3.peg.3310	BCO26_2796	VBIBacCoa177709_3310	NP_001001937.1	Homo sapiens		ATP synthase alpha chain (EC 3.6.3.14)				91	98	58	0
FBA	Essential Gene	PATRIC	Bacillus coagulans 2-6	fig|941639.3.peg.1859	BCO26_1553	VBIBacCoa177709_1859				3-dehydroquinate synthase (EC 4.2.3.4)	Essential gene, predicted using metabolic flux-balance analysis in LB media
FBA	Essential Gene	PATRIC	Bacillus coagulans 2-6	fig|941639.3.peg.2692	BCO26_2281	VBIBacCoa177709_2692				ABC transporter, ATP-binding protein (cluster 3, basic aa/glutamine/opines)	Essential gene, predicted using metabolic flux-balance analysis in LB media
FBA	Essential Gene	PATRIC	Bacillus coagulans 2-6	fig|941639.3.peg.3416	BCO26_2889	VBIBacCoa177709_3416				Methionine ABC transporter substrate-binding protein	Essential gene, predicted using metabolic flux-balance analysis in LB media
BLASTP	Human Homolog	Human	Bacillus coagulans 2-6	fig|941639.3.peg.3382	BCO26_2859	VBIBacCoa177709_3382	NP_550433.1	Homo sapiens		Uracil-DNA glycosylase, family 1 (EC 3.2.2.27)				69	95	52	1e-70
FBA	Essential Gene	PATRIC	Bacillus coagulans 2-6	fig|941639.3.peg.157	BCO26_0144	VBIBacCoa177709_0157				DNA-directed RNA polymerase alpha subunit (EC 2.7.7.6)	Essential gene, predicted using metabolic flux-balance analysis in LB media
FBA	Essential Gene	PATRIC	Bacillus coagulans 2-6	fig|941639.3.peg.883	BCO26_0720	VBIBacCoa177709_0883			tagG	Teichoic acid translocation permease protein TagG	Essential gene, predicted using metabolic flux-balance analysis in LB media
BLASTP	Human Homolog	Human	Bacillus coagulans 2-6	fig|941639.3.peg.3232	BCO26_2724	VBIBacCoa177709_3232	XP_005246575.1	Homo sapiens		Heat shock protein 60 kDa family chaperone GroEL				91	96	52	0
FBA	Essential Gene	PATRIC	Bacillus coagulans 2-6	fig|941639.3.peg.1911	BCO26_1601	VBIBacCoa177709_1911				Diaminopimelate decarboxylase (EC 4.1.1.20)	Essential gene, predicted using metabolic flux-balance analysis in LB media
BLAT	Virulence Factor	Victors	Bacillus coagulans 2-6	fig|941639.3.peg.1364	BCO26_1126	VBIBacCoa177709_1364	227813264	Bacillus anthracis str. CDC 684	codY	GTP-sensing transcriptional pleiotropic repressor CodY			19651859	98	98	82	1e-114
K-mer Search	Antibiotic Resistance	PATRIC	Bacillus coagulans 2-6	fig|941639.3.peg.1592	BCO26_1324	VBIBacCoa177709_1592			ytsC	Bacitracin export ATP-binding protein BceA		efflux pump conferring antibiotic resistance	25118291
FBA	Essential Gene	PATRIC	Bacillus coagulans 2-6	fig|941639.3.peg.2856	BCO26_2411	VBIBacCoa177709_2856				Ca(2+)/H(+) antiporter	Essential gene, predicted using metabolic flux-balance analysis in LB media
FBA	Essential Gene	PATRIC	Bacillus coagulans 2-6	fig|941639.3.peg.1856	BCO26_1550	VBIBacCoa177709_1856				Prephenate dehydrogenase (EC 1.3.1.12)	Essential gene, predicted using metabolic flux-balance analysis in LB media
FBA	Essential Gene	PATRIC	Bacillus coagulans 2-6	fig|941639.3.peg.2790	BCO26_2367	VBIBacCoa177709_2790				Acetolactate synthase large subunit (EC 2.2.1.6)	Essential gene, predicted using metabolic flux-balance analysis in LB media
FBA	Essential Gene	PATRIC	Bacillus coagulans 2-6	fig|941639.3.peg.149	BCO26_0135	VBIBacCoa177709_0149			rpsE	SSU ribosomal protein S5p (S2e)	Essential gene, predicted using metabolic flux-balance analysis in LB media
FBA	Essential Gene	PATRIC	Bacillus coagulans 2-6	fig|941639.3.peg.2466	BCO26_2090	VBIBacCoa177709_2466				2-succinyl-5-enolpyruvyl-6-hydroxy-3-cyclohexene-1-carboxylic-acid synthase (EC 2.2.1.9)	Essential gene, predicted using metabolic flux-balance analysis in LB media
FBA	Essential Gene	PATRIC	Bacillus coagulans 2-6	fig|941639.3.peg.954	BCO26_0778	VBIBacCoa177709_0954				Coproporphyrin ferrochelatase (EC 4.99.1.9)	Essential gene, predicted using metabolic flux-balance analysis in LB media
FBA	Essential Gene	PATRIC	Bacillus coagulans 2-6	fig|941639.3.peg.1416	BCO26_1174	VBIBacCoa177709_1416			nusA	Transcription termination protein NusA	Essential gene, predicted using metabolic flux-balance analysis in LB media
BLAT	Drug Target	DrugBank	Bacillus coagulans 2-6	fig|941639.3.peg.2637	BCO26_2240	VBIBacCoa177709_2637	P00362	Geobacillus stearothermophilus		NAD-dependent glyceraldehyde-3-phosphate dehydrogenase (EC 1.2.1.12)	Glyceraldehyde-3-Phosphate	Drug target		100	100	84	1e-161
BLAT	Transporter	TCDB	Bacillus coagulans 2-6	fig|941639.3.peg.2262	BCO26_1910	VBIBacCoa177709_2262	Q65GF5	Bacillus licheniformis (strain DSM 13 / ATCC 14580)		Succinate dehydrogenase iron-sulfur protein (EC 1.3.5.1)	the prokaryotic succinate dehydrogenase (sdh) family.	3.D.10.1.1	15383718;15461803	99	99	82	1e-128
FBA	Essential Gene	PATRIC	Bacillus coagulans 2-6	fig|941639.3.peg.3357	BCO26_2838	VBIBacCoa177709_3357			argS	Arginyl-tRNA synthetase (EC 6.1.1.19)	Essential gene, predicted using metabolic flux-balance analysis in LB media
FBA	Essential Gene	PATRIC	Bacillus coagulans 2-6	fig|941639.3.peg.3141	BCO26_2641	VBIBacCoa177709_3141			gatA	Aspartyl-tRNA(Asn) amidotransferase subunit A (EC 6.3.5.6) @ Glutamyl-tRNA(Gln) amidotransferase subunit A (EC 6.3.5.7)	Essential gene, predicted using metabolic flux-balance analysis in LB media
FBA	Essential Gene	PATRIC	Bacillus coagulans 2-6	fig|941639.3.peg.1868	BCO26_1561	VBIBacCoa177709_1868				DNA-binding protein HBsu	Essential gene, predicted using metabolic flux-balance analysis in LB media
FBA	Essential Gene	PATRIC	Bacillus coagulans 2-6	fig|941639.3.peg.127	BCO26_0114	VBIBacCoa177709_0127			rpsG	SSU ribosomal protein S7p (S5e)	Essential gene, predicted using metabolic flux-balance analysis in LB media
BLASTP	Human Homolog	Human	Bacillus coagulans 2-6	fig|941639.3.peg.1624	BCO26_1352	VBIBacCoa177709_1624	XP_006716840.1	Homo sapiens	citB	Aconitate hydratase (EC 4.2.1.3)				96	96	54	0
FBA	Essential Gene	PATRIC	Bacillus coagulans 2-6	fig|941639.3.peg.3497	BCO26_2954	VBIBacCoa177709_3497				SSU ribosomal protein S18p @ SSU ribosomal protein S18p, zinc-independent	Essential gene, predicted using metabolic flux-balance analysis in LB media
FBA	Essential Gene	PATRIC	Bacillus coagulans 2-6	fig|941639.3.peg.612	BCO26_0503	VBIBacCoa177709_0612				N-acetylmannosaminyltransferase (EC 2.4.1.187)	Essential gene, predicted using metabolic flux-balance analysis in LB media
K-mer Search	Antibiotic Resistance	PATRIC	Bacillus coagulans 2-6	fig|941639.3.peg.147	BCO26_0133	VBIBacCoa177709_0147			rplF	LSU ribosomal protein L6p (L9e)		antibiotic target in susceptible species	19289529;17923494
BLAT	Virulence Factor	PATRIC_VF	Bacillus coagulans 2-6	fig|941639.3.peg.3165	BCO26_2665	VBIBacCoa177709_3165	LMOh7858_1898	Listeria monocytogenes serotype 4b str. H7858		Adenylosuccinate lyase (EC 4.3.2.2) @ SAICAR lyase (EC 4.3.2.2)		Virulence	22506772	91	90	82	1e-194
FBA	Essential Gene	PATRIC	Bacillus coagulans 2-6	fig|941639.3.peg.280	BCO26_0244	VBIBacCoa177709_0280				Uroporphyrinogen-III methyltransferase (EC 2.1.1.107)	Essential gene, predicted using metabolic flux-balance analysis in LB media
BLASTP	Human Homolog	Human	Bacillus coagulans 2-6	fig|941639.3.peg.909	BCO26_0741	VBIBacCoa177709_0909	NP_000134.2	Homo sapiens	fumC	Fumarate hydratase class II (EC 4.2.1.2)				89	98	59	0
FBA	Essential Gene	PATRIC	Bacillus coagulans 2-6	fig|941639.3.peg.158	BCO26_0145	VBIBacCoa177709_0158				LSU ribosomal protein L17p	Essential gene, predicted using metabolic flux-balance analysis in LB media
FBA	Essential Gene	PATRIC	Bacillus coagulans 2-6	fig|941639.3.peg.1312	BCO26_1078	VBIBacCoa177709_1312				Phosphopantothenoylcysteine decarboxylase (EC 4.1.1.36) / Phosphopantothenoylcysteine synthetase (EC 6.3.2.5)	Essential gene, predicted using metabolic flux-balance analysis in LB media
FBA	Essential Gene	PATRIC	Bacillus coagulans 2-6	fig|941639.3.peg.2791	BCO26_2368	VBIBacCoa177709_2791			ilvD	Dihydroxy-acid dehydratase (EC 4.2.1.9)	Essential gene, predicted using metabolic flux-balance analysis in LB media
FBA	Essential Gene	PATRIC	Bacillus coagulans 2-6	fig|941639.3.peg.156	BCO26_0143	VBIBacCoa177709_0156			rpsK	SSU ribosomal protein S11p (S14e)	Essential gene, predicted using metabolic flux-balance analysis in LB media
K-mer Search	Antibiotic Resistance	PATRIC	Bacillus coagulans 2-6	fig|941639.3.peg.1594	BCO26_1326	VBIBacCoa177709_1594				Two-component response regulator BceR		regulator modulating expression of antibiotic resistance genes	25118291
FBA	Essential Gene	PATRIC	Bacillus coagulans 2-6	fig|941639.3.peg.2427	BCO26_2057	VBIBacCoa177709_2427			leuS	Leucyl-tRNA synthetase (EC 6.1.1.4)	Essential gene, predicted using metabolic flux-balance analysis in LB media
FBA	Essential Gene	PATRIC	Bacillus coagulans 2-6	fig|941639.3.peg.2395	BCO26_2027	VBIBacCoa177709_2395				Chorismate mutase I (EC 5.4.99.5) / 2-keto-3-deoxy-D-arabino-heptulosonate-7-phosphate synthase I beta (EC 2.5.1.54)	Essential gene, predicted using metabolic flux-balance analysis in LB media
FBA	Essential Gene	PATRIC	Bacillus coagulans 2-6	fig|941639.3.peg.87	BCO26_0080	VBIBacCoa177709_0087				DNA polymerase III subunits gamma and tau (EC 2.7.7.7)	Essential gene, predicted using metabolic flux-balance analysis in LB media
FBA	Essential Gene	PATRIC	Bacillus coagulans 2-6	fig|941639.3.peg.2080	BCO26_1754	VBIBacCoa177709_2080				DNA polymerase III delta subunit (EC 2.7.7.7)	Essential gene, predicted using metabolic flux-balance analysis in LB media
FBA	Essential Gene	PATRIC	Bacillus coagulans 2-6	fig|941639.3.peg.79	BCO26_0074	VBIBacCoa177709_0079			serS	Seryl-tRNA synthetase (EC 6.1.1.11)	Essential gene, predicted using metabolic flux-balance analysis in LB media
FBA	Essential Gene	PATRIC	Bacillus coagulans 2-6	fig|941639.3.peg.6	BCO26_0006	VBIBacCoa177709_0006			gyrB	DNA gyrase subunit B (EC 5.99.1.3)	Essential gene, predicted using metabolic flux-balance analysis in LB media
FBA	Essential Gene	PATRIC	Bacillus coagulans 2-6	fig|941639.3.peg.124	BCO26_0111	VBIBacCoa177709_0124			rpoC	DNA-directed RNA polymerase beta' subunit (EC 2.7.7.6)	Essential gene, predicted using metabolic flux-balance analysis in LB media
K-mer Search	Antibiotic Resistance	PATRIC	Bacillus coagulans 2-6	fig|941639.3.peg.1407	BCO26_1168	VBIBacCoa177709_1407				1-deoxy-D-xylulose 5-phosphate reductoisomerase (EC 1.1.1.267)		antibiotic target in susceptible species	16321944
FBA	Essential Gene	PATRIC	Bacillus coagulans 2-6	fig|941639.3.peg.1908	BCO26_1598	VBIBacCoa177709_1908				Segregation and condensation protein A	Essential gene, predicted using metabolic flux-balance analysis in LB media
FBA	Essential Gene	PATRIC	Bacillus coagulans 2-6	fig|941639.3.peg.1265	BCO26_1038	VBIBacCoa177709_1265			ileS	Isoleucyl-tRNA synthetase (EC 6.1.1.5)	Essential gene, predicted using metabolic flux-balance analysis in LB media
BLASTP	Human Homolog	Human	Bacillus coagulans 2-6	fig|941639.3.peg.276	BCO26_0241	VBIBacCoa177709_0276	NP_001071.1	Homo sapiens		Succinate-semialdehyde dehydrogenase [NAD(P)+] (EC 1.2.1.16)				87	98	54	8e-162
FBA	Essential Gene	PATRIC	Bacillus coagulans 2-6	fig|941639.3.peg.1406	BCO26_1167	VBIBacCoa177709_1406				Phosphatidate cytidylyltransferase (EC 2.7.7.41)	Essential gene, predicted using metabolic flux-balance analysis in LB media
FBA	Essential Gene	PATRIC	Bacillus coagulans 2-6	fig|941639.3.peg.3078	BCO26_2593	VBIBacCoa177709_3078				5-methyltetrahydropteroyltriglutamate--homocysteine methyltransferase (EC 2.1.1.14)	Essential gene, predicted using metabolic flux-balance analysis in LB media
FBA	Essential Gene	PATRIC	Bacillus coagulans 2-6	fig|941639.3.peg.2075	BCO26_1749	VBIBacCoa177709_2075				Oxygen-independent coproporphyrinogen-III oxidase-like protein YggW	Essential gene, predicted using metabolic flux-balance analysis in LB media
FBA	Essential Gene	PATRIC	Bacillus coagulans 2-6	fig|941639.3.peg.1858	BCO26_1552	VBIBacCoa177709_1858			aroH	Chorismate mutase II (EC 5.4.99.5)	Essential gene, predicted using metabolic flux-balance analysis in LB media
K-mer Search	Antibiotic Resistance	PATRIC	Bacillus coagulans 2-6	fig|941639.3.peg.1591	BCO26_1323	VBIBacCoa177709_1591			bceB	Bacitracin export permease protein BceB		efflux pump conferring antibiotic resistance	25118291
FBA	Essential Gene	PATRIC	Bacillus coagulans 2-6	fig|941639.3.peg.155	BCO26_0142	VBIBacCoa177709_0155			rpsM	SSU ribosomal protein S13p (S18e)	Essential gene, predicted using metabolic flux-balance analysis in LB media
K-mer Search	Antibiotic Resistance	PATRIC	Bacillus coagulans 2-6	fig|941639.3.peg.126	BCO26_0113	VBIBacCoa177709_0126			rpsL	SSU ribosomal protein S12p (S23e)		antibiotic target in susceptible species	7934937
FBA	Essential Gene	PATRIC	Bacillus coagulans 2-6	fig|941639.3.peg.1346	BCO26_1111	VBIBacCoa177709_1346			rplS	LSU ribosomal protein L19p	Essential gene, predicted using metabolic flux-balance analysis in LB media
K-mer Search	Antibiotic Resistance	PATRIC	Bacillus coagulans 2-6	fig|941639.3.peg.3333	BCO26_2816	VBIBacCoa177709_3333				Transcription termination factor Rho		antibiotic target in susceptible species	8466900
FBA	Essential Gene	PATRIC	Bacillus coagulans 2-6	fig|941639.3.peg.1220	BCO26_0998	VBIBacCoa177709_1220				Phosphopantetheine adenylyltransferase (EC 2.7.7.3)	Essential gene, predicted using metabolic flux-balance analysis in LB media
FBA	Essential Gene	PATRIC	Bacillus coagulans 2-6	fig|941639.3.peg.1425	BCO26_1182	VBIBacCoa177709_1425			ribF	FMN adenylyltransferase (EC 2.7.7.2) / Riboflavin kinase (EC 2.7.1.26)	Essential gene, predicted using metabolic flux-balance analysis in LB media
FBA	Essential Gene	PATRIC	Bacillus coagulans 2-6	fig|941639.3.peg.135	BCO26_0122	VBIBacCoa177709_0135			rplB	LSU ribosomal protein L2p (L8e)	Essential gene, predicted using metabolic flux-balance analysis in LB media
BLAT	Drug Target	DrugBank	Bacillus coagulans 2-6	fig|941639.3.peg.2323	BCO26_1963	VBIBacCoa177709_2323	P39126	Bacillus subtilis (strain 168)		Isocitrate dehydrogenase [NADP] (EC 1.1.1.42)	(R)-Propylene glycol;Citric Acid;S-1,2-Propanediol;S,S-(2-Hydroxyethyl)Thiocysteine'	Drug target		99	99	89	1e-222
FBA	Essential Gene	PATRIC	Bacillus coagulans 2-6	fig|941639.3.peg.281	BCO26_0245	VBIBacCoa177709_0281				Sirohydrochlorin ferrochelatase SirB (EC 4.99.1.4)	Essential gene, predicted using metabolic flux-balance analysis in LB media
FBA	Essential Gene	PATRIC	Bacillus coagulans 2-6	fig|941639.3.peg.1313	BCO26_1079	VBIBacCoa177709_1313				Helicase PriA essential for oriC/DnaA-independent DNA replication	Essential gene, predicted using metabolic flux-balance analysis in LB media
FBA	Essential Gene	PATRIC	Bacillus coagulans 2-6	fig|941639.3.peg.3165	BCO26_2665	VBIBacCoa177709_3165				Adenylosuccinate lyase (EC 4.3.2.2) @ SAICAR lyase (EC 4.3.2.2)	Essential gene, predicted using metabolic flux-balance analysis in LB media
FBA	Essential Gene	PATRIC	Bacillus coagulans 2-6	fig|941639.3.peg.146	BCO26_0132	VBIBacCoa177709_0146			rpsH	SSU ribosomal protein S8p (S15Ae)	Essential gene, predicted using metabolic flux-balance analysis in LB media
BLASTP	Human Homolog	Human	Bacillus coagulans 2-6	fig|941639.3.peg.902	BCO26_0736	VBIBacCoa177709_0902	NP_006003.1	Homo sapiens	clpP	ATP-dependent Clp protease proteolytic subunit ClpP (EC 3.4.21.92)				68	96	56	7e-74
FBA	Essential Gene	PATRIC	Bacillus coagulans 2-6	fig|941639.3.peg.2219	BCO26_1878	VBIBacCoa177709_2219				Valyl-tRNA synthetase (EC 6.1.1.9)	Essential gene, predicted using metabolic flux-balance analysis in LB media
K-mer Search	Antibiotic Resistance	PATRIC	Bacillus coagulans 2-6	fig|941639.3.peg.1453	BCO26_1207	VBIBacCoa177709_1453				CDP-diacylglycerol--glycerol-3-phosphate 3-phosphatidyltransferase (EC 2.7.8.5)		protein altering cell wall charge conferring antibiotic resistance	22238576
BLAT	Transporter	TCDB	Bacillus coagulans 2-6	fig|941639.3.peg.2659	BCO26_2257	VBIBacCoa177709_2659	P26904	Bacillus subtilis	dppC	Dipeptide ABC transporter, permease protein DppC (TC 3.A.1.5.2)	the atp-binding cassette (abc) superfamily.	3.A.1.5.2	11069674;11473256;1766370;19383706;3145906;9384377	89	89	81	1e-135
K-mer Search	Antibiotic Resistance	PATRIC	Bacillus coagulans 2-6	fig|941639.3.peg.3336	BCO26_2818	VBIBacCoa177709_3336				UDP-N-acetylglucosamine 1-carboxyvinyltransferase (EC 2.5.1.7)		antibiotic target in susceptible species	8994972
FBA	Essential Gene	PATRIC	Bacillus coagulans 2-6	fig|941639.3.peg.14	BCO26_0016	VBIBacCoa177709_0014				DNA polymerase III delta prime subunit (EC 2.7.7.7)	Essential gene, predicted using metabolic flux-balance analysis in LB media
FBA	Essential Gene	PATRIC	Bacillus coagulans 2-6	fig|941639.3.peg.2306	BCO26_1947	VBIBacCoa177709_2306				LSU ribosomal protein L35p	Essential gene, predicted using metabolic flux-balance analysis in LB media
FBA	Essential Gene	PATRIC	Bacillus coagulans 2-6	fig|941639.3.peg.2285	BCO26_1930	VBIBacCoa177709_2285			pheT	Phenylalanyl-tRNA synthetase beta chain (EC 6.1.1.20)	Essential gene, predicted using metabolic flux-balance analysis in LB media
FBA	Essential Gene	PATRIC	Bacillus coagulans 2-6	fig|941639.3.peg.2048	BCO26_1725	VBIBacCoa177709_2048			rpoD	RNA polymerase sigma factor RpoD	Essential gene, predicted using metabolic flux-balance analysis in LB media
FBA	Essential Gene	PATRIC	Bacillus coagulans 2-6	fig|941639.3.peg.2465	BCO26_2089	VBIBacCoa177709_2465				2-succinyl-6-hydroxy-2,4-cyclohexadiene-1-carboxylate synthase (EC 4.2.99.20)	Essential gene, predicted using metabolic flux-balance analysis in LB media
FBA	Essential Gene	PATRIC	Bacillus coagulans 2-6	fig|941639.3.peg.3417	BCO26_2890	VBIBacCoa177709_3417				Methionine ABC transporter permease protein	Essential gene, predicted using metabolic flux-balance analysis in LB media
FBA	Essential Gene	PATRIC	Bacillus coagulans 2-6	fig|941639.3.peg.620	BCO26_0511	VBIBacCoa177709_0620			tagH	Teichoic acid export ATP-binding protein TagH (EC 3.6.3.40)	Essential gene, predicted using metabolic flux-balance analysis in LB media
FBA	Essential Gene	PATRIC	Bacillus coagulans 2-6	fig|941639.3.peg.2157	BCO26_1818	VBIBacCoa177709_2157			hisS	Histidyl-tRNA synthetase (EC 6.1.1.21)	Essential gene, predicted using metabolic flux-balance analysis in LB media
K-mer Search	Antibiotic Resistance	PATRIC	Bacillus coagulans 2-6	fig|941639.3.peg.1003	BCO26_0817	VBIBacCoa177709_1003				3-oxoacyl-[acyl-carrier-protein] synthase, KASII (EC 2.3.1.179)		antibiotic target in susceptible species	10428945
BLAT	Virulence Factor	Victors	Bacillus coagulans 2-6	fig|941639.3.peg.2235	BCO26_1892	VBIBacCoa177709_2235	227817253	Bacillus anthracis str. CDC 684	clpX	ATP-dependent Clp protease ATP-binding subunit ClpX			20375606	98	97	85	1e-203
FBA	Essential Gene	PATRIC	Bacillus coagulans 2-6	fig|941639.3.peg.3522	BCO26_2975	VBIBacCoa177709_3522			rpmH	LSU ribosomal protein L34p	Essential gene, predicted using metabolic flux-balance analysis in LB media
BLASTP	Human Homolog	Human	Bacillus coagulans 2-6	fig|941639.3.peg.167	BCO26_0153	VBIBacCoa177709_0167	NP_005434.4	Homo sapiens	cysC	Adenylylsulfate kinase (EC 2.7.1.25)				32	97	52	4e-65
FBA	Essential Gene	PATRIC	Bacillus coagulans 2-6	fig|941639.3.peg.136	BCO26_0123	VBIBacCoa177709_0136			rpsS	SSU ribosomal protein S19p (S15e)	Essential gene, predicted using metabolic flux-balance analysis in LB media
FBA	Essential Gene	PATRIC	Bacillus coagulans 2-6	fig|941639.3.peg.677	BCO26_0557	VBIBacCoa177709_0677				Threonine synthase (EC 4.2.3.1)	Essential gene, predicted using metabolic flux-balance analysis in LB media
FBA	Essential Gene	PATRIC	Bacillus coagulans 2-6	fig|941639.3.peg.1855	BCO26_1549	VBIBacCoa177709_1855			aroE	3-phosphoshikimate 1-carboxyvinyltransferase (EC 2.5.1.19)	Essential gene, predicted using metabolic flux-balance analysis in LB media
FBA	Essential Gene	PATRIC	Bacillus coagulans 2-6	fig|941639.3.peg.3226	BCO26_2719	VBIBacCoa177709_3226				Nicotinate phosphoribosyltransferase (EC 6.3.4.21)	Essential gene, predicted using metabolic flux-balance analysis in LB media
FBA	Essential Gene	PATRIC	Bacillus coagulans 2-6	fig|941639.3.peg.65	BCO26_0059	VBIBacCoa177709_0065			coaA	Pantothenate kinase type III, CoaX-like (EC 2.7.1.33)	Essential gene, predicted using metabolic flux-balance analysis in LB media
FBA	Essential Gene	PATRIC	Bacillus coagulans 2-6	fig|941639.3.peg.143	BCO26_0130	VBIBacCoa177709_0143			rplX	LSU ribosomal protein L24p (L26e)	Essential gene, predicted using metabolic flux-balance analysis in LB media
K-mer Search	Antibiotic Resistance	PATRIC	Bacillus coagulans 2-6	fig|941639.3.peg.6	BCO26_0006	VBIBacCoa177709_0006			gyrB	DNA gyrase subunit B (EC 5.99.1.3)		antibiotic target in susceptible species	21693461;22279180;9293187
FBA	Essential Gene	PATRIC	Bacillus coagulans 2-6	fig|941639.3.peg.2189	BCO26_1849	VBIBacCoa177709_2189			rpmA	LSU ribosomal protein L27p	Essential gene, predicted using metabolic flux-balance analysis in LB media
BLASTP	Human Homolog	Human	Bacillus coagulans 2-6	fig|941639.3.peg.1538	BCO26_1277	VBIBacCoa177709_1538	NP_000681.2	Homo sapiens	dhaS	Aldehyde dehydrogenase (EC 1.2.1.3)				92	95	55	0
FBA	Essential Gene	PATRIC	Bacillus coagulans 2-6	fig|941639.3.peg.106	BCO26_0096	VBIBacCoa177709_0106			gltX	Glutamyl-tRNA synthetase (EC 6.1.1.17) @ Glutamyl-tRNA(Gln) synthetase (EC 6.1.1.24)	Essential gene, predicted using metabolic flux-balance analysis in LB media
FBA	Essential Gene	PATRIC	Bacillus coagulans 2-6	fig|941639.3.peg.1770	BCO26_1472	VBIBacCoa177709_1770			argG	Argininosuccinate synthase (EC 6.3.4.5)	Essential gene, predicted using metabolic flux-balance analysis in LB media
FBA	Essential Gene	PATRIC	Bacillus coagulans 2-6	fig|941639.3.peg.148	BCO26_0134	VBIBacCoa177709_0148			rplR	LSU ribosomal protein L18p (L5e)	Essential gene, predicted using metabolic flux-balance analysis in LB media
FBA	Essential Gene	PATRIC	Bacillus coagulans 2-6	fig|941639.3.peg.150	BCO26_0136	VBIBacCoa177709_0150			rpmD	LSU ribosomal protein L30p (L7e)	Essential gene, predicted using metabolic flux-balance analysis in LB media
BLASTP	Human Homolog	Human	Bacillus coagulans 2-6	fig|941639.3.peg.126	BCO26_0113	VBIBacCoa177709_0126	NP_203526.1	Homo sapiens	rpsL	SSU ribosomal protein S12p (S23e)				50	79	56	8e-22
FBA	Essential Gene	PATRIC	Bacillus coagulans 2-6	fig|941639.3.peg.3428	BCO26_2901	VBIBacCoa177709_3428				Uracil permease @ Uracil:proton symporter UraA	Essential gene, predicted using metabolic flux-balance analysis in LB media
FBA	Essential Gene	PATRIC	Bacillus coagulans 2-6	fig|941639.3.peg.1566	BCO26_1301	VBIBacCoa177709_1566			hisI	Phosphoribosyl-AMP cyclohydrolase (EC 3.5.4.19) / Phosphoribosyl-ATP pyrophosphatase (EC 3.6.1.31)	Essential gene, predicted using metabolic flux-balance analysis in LB media
FBA	Essential Gene	PATRIC	Bacillus coagulans 2-6	fig|941639.3.peg.3140	BCO26_2640	VBIBacCoa177709_3140			gatB	Aspartyl-tRNA(Asn) amidotransferase subunit B (EC 6.3.5.6) @ Glutamyl-tRNA(Gln) amidotransferase subunit B (EC 6.3.5.7)	Essential gene, predicted using metabolic flux-balance analysis in LB media
FBA	Essential Gene	PATRIC	Bacillus coagulans 2-6	fig|941639.3.peg.534	BCO26_0444	VBIBacCoa177709_0534			nadA	Quinolinate synthetase (EC 2.5.1.72)	Essential gene, predicted using metabolic flux-balance analysis in LB media
FBA	Essential Gene	PATRIC	Bacillus coagulans 2-6	fig|941639.3.peg.22	BCO26_0023	VBIBacCoa177709_0022				Methionyl-tRNA synthetase (EC 6.1.1.10)	Essential gene, predicted using metabolic flux-balance analysis in LB media
K-mer Search	Antibiotic Resistance	PATRIC	Bacillus coagulans 2-6	fig|941639.3.peg.1038	BCO26_0847	VBIBacCoa177709_1038				Enoyl-[acyl-carrier-protein] reductase [NADH] (EC 1.3.1.9)		antibiotic target in susceptible species	18193820;10869170;8284673
FBA	Essential Gene	PATRIC	Bacillus coagulans 2-6	fig|941639.3.peg.1828	BCO26_1524	VBIBacCoa177709_1828			asnC	Asparaginyl-tRNA synthetase (EC 6.1.1.22)	Essential gene, predicted using metabolic flux-balance analysis in LB media
FBA	Essential Gene	PATRIC	Bacillus coagulans 2-6	fig|941639.3.peg.3179	BCO26_2678	VBIBacCoa177709_3179			pbuG	Xanthine/uracil/thiamine/ascorbate permease family protein	Essential gene, predicted using metabolic flux-balance analysis in LB media
FBA	Essential Gene	PATRIC	Bacillus coagulans 2-6	fig|941639.3.peg.1310	BCO26_1076	VBIBacCoa177709_1310				Guanylate kinase (EC 2.7.4.8)	Essential gene, predicted using metabolic flux-balance analysis in LB media
FBA	Essential Gene	PATRIC	Bacillus coagulans 2-6	fig|941639.3.peg.2399	BCO26_2031	VBIBacCoa177709_2399				UDP-N-acetylmuramate--L-alanine ligase (EC 6.3.2.8)	Essential gene, predicted using metabolic flux-balance analysis in LB media
BLASTP	Human Homolog	Human	Bacillus coagulans 2-6	fig|941639.3.peg.2438	BCO26_2066	VBIBacCoa177709_2438	XP_005269899.1	Homo sapiens		S-adenosylmethionine synthetase (EC 2.5.1.6)				94	95	59	2e-151
FBA	Essential Gene	PATRIC	Bacillus coagulans 2-6	fig|941639.3.peg.123	BCO26_0110	VBIBacCoa177709_0123			rpoB	DNA-directed RNA polymerase beta subunit (EC 2.7.7.6)	Essential gene, predicted using metabolic flux-balance analysis in LB media
BLASTP	Human Homolog	Human	Bacillus coagulans 2-6	fig|941639.3.peg.1695	BCO26_1414	VBIBacCoa177709_1695	XP_006723607.1	Homo sapiens		O-acetyl-ADP-ribose deacetylase				36	84	53	3e-47
BLASTP	Human Homolog	Human	Bacillus coagulans 2-6	fig|941639.3.peg.2982	BCO26_2515	VBIBacCoa177709_2982	XP_006717934.1	Homo sapiens	rocD	Ornithine aminotransferase (EC 2.6.1.13)				90	97	50	1e-138
FBA	Essential Gene	PATRIC	Bacillus coagulans 2-6	fig|941639.3.peg.3087	BCO26_2600	VBIBacCoa177709_3087			deoD	Purine nucleoside phosphorylase (EC 2.4.2.1)	Essential gene, predicted using metabolic flux-balance analysis in LB media
FBA	Essential Gene	PATRIC	Bacillus coagulans 2-6	fig|941639.3.peg.3521	BCO26_2974	VBIBacCoa177709_3521				Ribonuclease P protein component (EC 3.1.26.5)	Essential gene, predicted using metabolic flux-balance analysis in LB media
FBA	Essential Gene	PATRIC	Bacillus coagulans 2-6	fig|941639.3.peg.38	BCO26_0037	VBIBacCoa177709_0038				Ribose-phosphate pyrophosphokinase (EC 2.7.6.1)	Essential gene, predicted using metabolic flux-balance analysis in LB media
FBA	Essential Gene	PATRIC	Bacillus coagulans 2-6	fig|941639.3.peg.71	BCO26_0065	VBIBacCoa177709_0071				Lysyl-tRNA synthetase (class II) (EC 6.1.1.6)	Essential gene, predicted using metabolic flux-balance analysis in LB media
FBA	Essential Gene	PATRIC	Bacillus coagulans 2-6	fig|941639.3.peg.3332	BCO26_2815	VBIBacCoa177709_3332				LSU ribosomal protein L31p @ LSU ribosomal protein L31p, zinc-dependent	Essential gene, predicted using metabolic flux-balance analysis in LB media
FBA	Essential Gene	PATRIC	Bacillus coagulans 2-6	fig|941639.3.peg.7	BCO26_0007	VBIBacCoa177709_0007				DNA gyrase subunit A (EC 5.99.1.3)	Essential gene, predicted using metabolic flux-balance analysis in LB media
FBA	Essential Gene	PATRIC	Bacillus coagulans 2-6	fig|941639.3.peg.1341	BCO26_1106	VBIBacCoa177709_1341			rpsP	SSU ribosomal protein S16p	Essential gene, predicted using metabolic flux-balance analysis in LB media
FBA	Essential Gene	PATRIC	Bacillus coagulans 2-6	fig|941639.3.peg.120	BCO26_0107	VBIBacCoa177709_0120				LSU ribosomal protein L10p (P0)	Essential gene, predicted using metabolic flux-balance analysis in LB media
FBA	Essential Gene	PATRIC	Bacillus coagulans 2-6	fig|941639.3.peg.2079	BCO26_1753	VBIBacCoa177709_2079			rpsT	SSU ribosomal protein S20p	Essential gene, predicted using metabolic flux-balance analysis in LB media
K-mer Search	Antibiotic Resistance	PATRIC	Bacillus coagulans 2-6	fig|941639.3.peg.124	BCO26_0111	VBIBacCoa177709_0124			rpoC	DNA-directed RNA polymerase beta' subunit (EC 2.7.7.6)		antibiotic target in susceptible species	16723576
K-mer Search	Antibiotic Resistance	PATRIC	Bacillus coagulans 2-6	fig|941639.3.peg.560	BCO26_0463	VBIBacCoa177709_0560				Glycerophosphoryl diester phosphodiesterase (EC 3.1.4.46)		protein altering cell wall charge conferring antibiotic resistance	21899450
FBA	Essential Gene	PATRIC	Bacillus coagulans 2-6	fig|941639.3.peg.1769	BCO26_1471	VBIBacCoa177709_1769				Argininosuccinate lyase (EC 4.3.2.1)	Essential gene, predicted using metabolic flux-balance analysis in LB media
BLAT	Transporter	TCDB	Bacillus coagulans 2-6	fig|941639.3.peg.2200	BCO26_1859	VBIBacCoa177709_2200	Q01465	Bacillus subtilis (strain 168)	mreB	Rod shape-determining protein MreB	the cell shape-determining mrebcd (mrebcd) family.	9.B.157.1.1		97	97	83	1e-153
BLAT	Transporter	TCDB	Bacillus coagulans 2-6	fig|941639.3.peg.2263	BCO26_1911	VBIBacCoa177709_2263	Q65GF4	Bacillus licheniformis (strain DSM 13 / ATCC 14580)	sdhA	Succinate dehydrogenase flavoprotein subunit (EC 1.3.5.1)	the prokaryotic succinate dehydrogenase (sdh) family.	3.D.10.1.1	15383718;15461803	93	94	85	1e-289
FBA	Essential Gene	PATRIC	Bacillus coagulans 2-6	fig|941639.3.peg.1400	BCO26_1162	VBIBacCoa177709_1400			rpsB	SSU ribosomal protein S2p (SAe)	Essential gene, predicted using metabolic flux-balance analysis in LB media
FBA	Essential Gene	PATRIC	Bacillus coagulans 2-6	fig|941639.3.peg.153	BCO26_0139	VBIBacCoa177709_0153				Adenylate kinase (EC 2.7.4.3)	Essential gene, predicted using metabolic flux-balance analysis in LB media
BLAT	Drug Target	DrugBank	Bacillus coagulans 2-6	fig|941639.3.peg.3258	BCO26_2749	VBIBacCoa177709_3258	P96622	Bacillus subtilis (strain 168)	mazF	Programmed cell death toxin YdcE	2-(2-{2-[2-(2-Methoxy-Ethoxy)-Ethoxy]-Ethoxy}-Ethoxy)-Ethanol	Drug target		83	96	89	3e-43
BLASTP	Human Homolog	Human	Bacillus coagulans 2-6	fig|941639.3.peg.1354	BCO26_1118	VBIBacCoa177709_1354	NP_003840.2	Homo sapiens	sucD	Succinyl-CoA ligase [ADP-forming] alpha chain (EC 6.2.1.5)				85	97	61	2e-104
FBA	Essential Gene	PATRIC	Bacillus coagulans 2-6	fig|941639.3.peg.1243	BCO26_1015	VBIBacCoa177709_1243			murE	UDP-N-acetylmuramoyl-dipeptide--2,6-diaminopimelate ligase (EC 6.3.2.13)	Essential gene, predicted using metabolic flux-balance analysis in LB media
BLASTP	Human Homolog	Human	Bacillus coagulans 2-6	fig|941639.3.peg.224	BCO26_0198	VBIBacCoa177709_0224	NP_005882.2	Homo sapiens		3-ketoacyl-CoA thiolase (EC 2.3.1.16) @ Acetyl-CoA acetyltransferase (EC 2.3.1.9)				97	98	53	3e-142
FBA	Essential Gene	PATRIC	Bacillus coagulans 2-6	fig|941639.3.peg.126	BCO26_0113	VBIBacCoa177709_0126			rpsL	SSU ribosomal protein S12p (S23e)	Essential gene, predicted using metabolic flux-balance analysis in LB media
FBA	Essential Gene	PATRIC	Bacillus coagulans 2-6	fig|941639.3.peg.603	BCO26_0496	VBIBacCoa177709_0603			metC	Cystathionine gamma-synthase (EC 2.5.1.48)	Essential gene, predicted using metabolic flux-balance analysis in LB media
BLAT	Antibiotic Resistance	CARD	Bacillus coagulans 2-6	fig|941639.3.peg.130	BCO26_0117	VBIBacCoa177709_0130	YP_006374661.1	Enterococcus faecium DO		Translation elongation factor Tu		antibiotic resistant gene variant or mutant;elfamycin resistance gene		93	100	85	1e-200
FBA	Essential Gene	PATRIC	Bacillus coagulans 2-6	fig|941639.3.peg.1896	BCO26_1586	VBIBacCoa177709_1896			ypaA	hypothetical protein	Essential gene, predicted using metabolic flux-balance analysis in LB media
FBA	Essential Gene	PATRIC	Bacillus coagulans 2-6	fig|941639.3.peg.2064		VBIBacCoa177709_2064				SSU ribosomal protein S21p	Essential gene, predicted using metabolic flux-balance analysis in LB media
BLASTP	Human Homolog	Human	Bacillus coagulans 2-6	fig|941639.3.peg.1697	BCO26_1416	VBIBacCoa177709_1697	NP_004484.1	Homo sapiens		hypothetical protein				95	96	61	3e-99
FBA	Essential Gene	PATRIC	Bacillus coagulans 2-6	fig|941639.3.peg.133	BCO26_0120	VBIBacCoa177709_0133				LSU ribosomal protein L4p (L1e)	Essential gene, predicted using metabolic flux-balance analysis in LB media
K-mer Search	Antibiotic Resistance	PATRIC	Bacillus coagulans 2-6	fig|941639.3.peg.1265	BCO26_1038	VBIBacCoa177709_1265			ileS	Isoleucyl-tRNA synthetase (EC 6.1.1.5)		antibiotic target in susceptible species	7929087
FBA	Essential Gene	PATRIC	Bacillus coagulans 2-6	fig|941639.3.peg.2333	BCO26_1972	VBIBacCoa177709_2333			dnaE	DNA polymerase III alpha subunit (EC 2.7.7.7)	Essential gene, predicted using metabolic flux-balance analysis in LB media
FBA	Essential Gene	PATRIC	Bacillus coagulans 2-6	fig|941639.3.peg.2462	BCO26_2086	VBIBacCoa177709_2462				O-succinylbenzoate synthase (EC 4.2.1.113)	Essential gene, predicted using metabolic flux-balance analysis in LB media
FBA	Essential Gene	PATRIC	Bacillus coagulans 2-6	fig|941639.3.peg.11	BCO26_0013	VBIBacCoa177709_0011				Thymidylate kinase (EC 2.7.4.9)	Essential gene, predicted using metabolic flux-balance analysis in LB media
FBA	Essential Gene	PATRIC	Bacillus coagulans 2-6	fig|941639.3.peg.1988	BCO26_1671	VBIBacCoa177709_1988				3-dehydroquinate dehydratase II (EC 4.2.1.10)	Essential gene, predicted using metabolic flux-balance analysis in LB media
FBA	Essential Gene	PATRIC	Bacillus coagulans 2-6	fig|941639.3.peg.119	BCO26_0106	VBIBacCoa177709_0119			rplA	LSU ribosomal protein L1p (L10Ae)	Essential gene, predicted using metabolic flux-balance analysis in LB media
FBA	Essential Gene	PATRIC	Bacillus coagulans 2-6	fig|941639.3.peg.2156	BCO26_1817	VBIBacCoa177709_2156				Aspartyl-tRNA synthetase (EC 6.1.1.12)	Essential gene, predicted using metabolic flux-balance analysis in LB media
FBA	Essential Gene	PATRIC	Bacillus coagulans 2-6	fig|941639.3.peg.2286	BCO26_1931	VBIBacCoa177709_2286				Phenylalanyl-tRNA synthetase alpha chain (EC 6.1.1.20)	Essential gene, predicted using metabolic flux-balance analysis in LB media
FBA	Essential Gene	PATRIC	Bacillus coagulans 2-6	fig|941639.3.peg.138	BCO26_0125	VBIBacCoa177709_0138			rpsC	SSU ribosomal protein S3p (S3e)	Essential gene, predicted using metabolic flux-balance analysis in LB media
FBA	Essential Gene	PATRIC	Bacillus coagulans 2-6	fig|941639.3.peg.2089	BCO26_1762	VBIBacCoa177709_2089			nadD	Nicotinate-nucleotide adenylyltransferase (EC 2.7.7.18)	Essential gene, predicted using metabolic flux-balance analysis in LB media
FBA	Essential Gene	PATRIC	Bacillus coagulans 2-6	fig|941639.3.peg.121	BCO26_0108	VBIBacCoa177709_0121				LSU ribosomal protein L7p/L12p (P1/P2)	Essential gene, predicted using metabolic flux-balance analysis in LB media
K-mer Search	Antibiotic Resistance	PATRIC	Bacillus coagulans 2-6	fig|941639.3.peg.2602	BCO26_2213	VBIBacCoa177709_2602			ywoA	Undecaprenyl-diphosphatase BcrC (EC 3.6.1.27), conveys bacitracin resistance		antibiotic target protection protein	12486040;15778224;15946938
BLASTP	Human Homolog	Human	Bacillus coagulans 2-6	fig|941639.3.peg.482	BCO26_0401	VBIBacCoa177709_0482	NP_001180241.1	Homo sapiens		hypothetical protein				16	90	69	5e-26
FBA	Essential Gene	PATRIC	Bacillus coagulans 2-6	fig|941639.3.peg.2191	BCO26_1851	VBIBacCoa177709_2191				LSU ribosomal protein L21p	Essential gene, predicted using metabolic flux-balance analysis in LB media
FBA	Essential Gene	PATRIC	Bacillus coagulans 2-6	fig|941639.3.peg.1035	BCO26_0843	VBIBacCoa177709_1035				NAD kinase (EC 2.7.1.23)	Essential gene, predicted using metabolic flux-balance analysis in LB media
FBA	Essential Gene	PATRIC	Bacillus coagulans 2-6	fig|941639.3.peg.151	BCO26_0137	VBIBacCoa177709_0151			rplO	LSU ribosomal protein L15p (L27Ae)	Essential gene, predicted using metabolic flux-balance analysis in LB media
BLAT	Transporter	TCDB	Bacillus coagulans 2-6	fig|941639.3.peg.2072	BCO26_1746	VBIBacCoa177709_2072	G4NXA5	Bacillus subtilis subsp. spizizenii TU-B-10	dnaK	Chaperone protein DnaK	the cation channel-forming heat shock protein-70 (hsp70) family.	1.A.33.1.4		95	95	85	1e-287
K-mer Search	Antibiotic Resistance	PATRIC	Bacillus coagulans 2-6	fig|941639.3.peg.1501	BCO26_1246	VBIBacCoa177709_1501				Dihydrofolate reductase (EC 1.5.1.3)		antibiotic target in susceptible species	20169085;25288078
BLAT	Drug Target	DrugBank	Bacillus coagulans 2-6	fig|941639.3.peg.3317	BCO26_2801	VBIBacCoa177709_3317	Q5KUI3	Geobacillus kaustophilus (strain HTA426)		Uracil phosphoribosyltransferase (EC 2.4.2.9)	Uridine-5'-Monophosphate	Drug target		97	97	83	9e-99
BLASTP	Human Homolog	Human	Bacillus coagulans 2-6	fig|941639.3.peg.2235	BCO26_1892	VBIBacCoa177709_2235	NP_006651.2	Homo sapiens	clpX	ATP-dependent Clp protease ATP-binding subunit ClpX				51	72	52	1e-101
BLASTP	Human Homolog	Human	Bacillus coagulans 2-6	fig|941639.3.peg.2632	BCO26_2235	VBIBacCoa177709_2632	NP_001966.1	Homo sapiens		Enolase (EC 4.2.1.11)				97	97	52	5e-149
FBA	Essential Gene	PATRIC	Bacillus coagulans 2-6	fig|941639.3.peg.1634	BCO26_1362	VBIBacCoa177709_1634			parC	DNA topoisomerase IV subunit A (EC 5.99.1.3)	Essential gene, predicted using metabolic flux-balance analysis in LB media
FBA	Essential Gene	PATRIC	Bacillus coagulans 2-6	fig|941639.3.peg.2185	BCO26_1845	VBIBacCoa177709_2185			pheA	Prephenate dehydratase (EC 4.2.1.51)	Essential gene, predicted using metabolic flux-balance analysis in LB media
FBA	Essential Gene	PATRIC	Bacillus coagulans 2-6	fig|941639.3.peg.1315	BCO26_1081	VBIBacCoa177709_1315				Methionyl-tRNA formyltransferase (EC 2.1.2.9)	Essential gene, predicted using metabolic flux-balance analysis in LB media
BLASTP	Human Homolog	Human	Bacillus coagulans 2-6	fig|941639.3.peg.2072	BCO26_1746	VBIBacCoa177709_2072	NP_004125.3	Homo sapiens	dnaK	Chaperone protein DnaK				91	97	55	0
BLASTP	Human Homolog	Human	Bacillus coagulans 2-6	fig|941639.3.peg.1537	BCO26_1276	VBIBacCoa177709_1537	NP_001924.2	Homo sapiens		Dihydrolipoamide succinyltransferase component (E2) of 2-oxoglutarate dehydrogenase complex (EC 2.3.1.61)				55	60	53	1e-83
FBA	Essential Gene	PATRIC	Bacillus coagulans 2-6	fig|941639.3.peg.163	BCO26_0150	VBIBacCoa177709_0163			rplM	LSU ribosomal protein L13p (L13Ae)	Essential gene, predicted using metabolic flux-balance analysis in LB media
FBA	Essential Gene	PATRIC	Bacillus coagulans 2-6	fig|941639.3.peg.2463	BCO26_2087	VBIBacCoa177709_2463				O-succinylbenzoic acid--CoA ligase (EC 6.2.1.26)	Essential gene, predicted using metabolic flux-balance analysis in LB media
FBA	Essential Gene	PATRIC	Bacillus coagulans 2-6	fig|941639.3.peg.536	BCO26_0446	VBIBacCoa177709_0536				L-aspartate oxidase (EC 1.4.3.16)	Essential gene, predicted using metabolic flux-balance analysis in LB media
K-mer Search	Antibiotic Resistance	PATRIC	Bacillus coagulans 2-6	fig|941639.3.peg.698	BCO26_0575	VBIBacCoa177709_0698				weak similarity to aminoglycoside N(3)-acetyltransferase		antibiotic inactivation enzyme	;
FBA	Essential Gene	PATRIC	Bacillus coagulans 2-6	fig|941639.3.peg.303	BCO26_0258	VBIBacCoa177709_0303				Phosphomevalonate kinase (EC 2.7.4.2)	Essential gene, predicted using metabolic flux-balance analysis in LB media
FBA	Essential Gene	PATRIC	Bacillus coagulans 2-6	fig|941639.3.peg.2878	BCO26_2431	VBIBacCoa177709_2878				Cystathionine beta-synthase (EC 4.2.1.22)	Essential gene, predicted using metabolic flux-balance analysis in LB media
FBA	Essential Gene	PATRIC	Bacillus coagulans 2-6	fig|941639.3.peg.1248	BCO26_1020	VBIBacCoa177709_1248			murG	UDP-N-acetylglucosamine--N-acetylmuramyl-(pentapeptide) pyrophosphoryl-undecaprenol N-acetylglucosamine transferase (EC 2.4.1.227)	Essential gene, predicted using metabolic flux-balance analysis in LB media
FBA	Essential Gene	PATRIC	Bacillus coagulans 2-6	fig|941639.3.peg.1357	BCO26_1121	VBIBacCoa177709_1357				DNA topoisomerase I (EC 5.99.1.2)	Essential gene, predicted using metabolic flux-balance analysis in LB media
K-mer Search	Antibiotic Resistance	PATRIC	Bacillus coagulans 2-6	fig|941639.3.peg.3281	BCO26_2770	VBIBacCoa177709_3281				D-alanine--D-alanine ligase (EC 6.3.2.4)		antibiotic target in susceptible species	24303782;24033232
FBA	Essential Gene	PATRIC	Bacillus coagulans 2-6	fig|941639.3.peg.394	BCO26_0331	VBIBacCoa177709_0394				5-methyltetrahydrofolate--homocysteine methyltransferase (EC 2.1.1.13)	Essential gene, predicted using metabolic flux-balance analysis in LB media
FBA	Essential Gene	PATRIC	Bacillus coagulans 2-6	fig|941639.3.peg.1013	BCO26_0825	VBIBacCoa177709_1013			trpS	Tryptophanyl-tRNA synthetase (EC 6.1.1.2)	Essential gene, predicted using metabolic flux-balance analysis in LB media
BLASTP	Human Homolog	Human	Bacillus coagulans 2-6	fig|941639.3.peg.2028	BCO26_1706	VBIBacCoa177709_2028	NP_001019636.1	Homo sapiens	sodA	Superoxide dismutase [Mn] (EC 1.15.1.1)				88	99	52	3e-68
BLASTP	Human Homolog	Human	Bacillus coagulans 2-6	fig|941639.3.peg.3307	BCO26_2794	VBIBacCoa177709_3307	NP_001677.2	Homo sapiens		ATP synthase beta chain (EC 3.6.3.14)				87	98	68	0
FBA	Essential Gene	PATRIC	Bacillus coagulans 2-6	fig|941639.3.peg.3486	BCO26_2946	VBIBacCoa177709_3486				Two-component sensor kinase SA14-24	Essential gene, predicted using metabolic flux-balance analysis in LB media
FBA	Essential Gene	PATRIC	Bacillus coagulans 2-6	fig|941639.3.peg.2464	BCO26_2088	VBIBacCoa177709_2464			menB	Naphthoate synthase (EC 4.1.3.36)	Essential gene, predicted using metabolic flux-balance analysis in LB media
FBA	Essential Gene	PATRIC	Bacillus coagulans 2-6	fig|941639.3.peg.134	BCO26_0121	VBIBacCoa177709_0134				LSU ribosomal protein L23p (L23Ae)	Essential gene, predicted using metabolic flux-balance analysis in LB media
FBA	Essential Gene	PATRIC	Bacillus coagulans 2-6	fig|941639.3.peg.1731	BCO26_1438	VBIBacCoa177709_1731			mntH	Manganese transport protein MntH	Essential gene, predicted using metabolic flux-balance analysis in LB media
FBA	Essential Gene	PATRIC	Bacillus coagulans 2-6	fig|941639.3.peg.1951	BCO26_1637	VBIBacCoa177709_1951				Dihydrolipoamide acyltransferase component of branched-chain alpha-keto acid dehydrogenase complex (EC 2.3.1.168)	Essential gene, predicted using metabolic flux-balance analysis in LB media
BLAT	Drug Target	DrugBank	Bacillus coagulans 2-6	fig|941639.3.peg.1633	BCO26_1361	VBIBacCoa177709_1633	Q59192	Bacillus subtilis (strain 168)		DNA topoisomerase IV subunit B (EC 5.99.1.3)	Ciprofloxacin	Drug target		83	83	83	1e-271
FBA	Essential Gene	PATRIC	Bacillus coagulans 2-6	fig|941639.3.peg.109	BCO26_0099	VBIBacCoa177709_0109			cysS	Cysteinyl-tRNA synthetase (EC 6.1.1.16)	Essential gene, predicted using metabolic flux-balance analysis in LB media
FBA	Essential Gene	PATRIC	Bacillus coagulans 2-6	fig|941639.3.peg.2137	BCO26_1803	VBIBacCoa177709_2137			alaS	Alanyl-tRNA synthetase (EC 6.1.1.7)	Essential gene, predicted using metabolic flux-balance analysis in LB media
K-mer Search	Antibiotic Resistance	PATRIC	Bacillus coagulans 2-6	fig|941639.3.peg.3440	BCO26_2910	VBIBacCoa177709_3440				Glycerophosphoryl diester phosphodiesterase (EC 3.1.4.46)		protein altering cell wall charge conferring antibiotic resistance	21899450
BLAT	Antibiotic Resistance	CARD	Bacillus coagulans 2-6	fig|941639.3.peg.2846		VBIBacCoa177709_2846	ABR14060.1	Streptococcus uberis		Lincosamide nucleotidyltransferase => Lnu(D)		antibiotic inactivation enzyme;lincosamide resistance gene		25	97	90	5e-17
FBA	Essential Gene	PATRIC	Bacillus coagulans 2-6	fig|941639.3.peg.1953	BCO26_1639	VBIBacCoa177709_1953				Branched-chain alpha-keto acid dehydrogenase, E1 component, alpha subunit (EC 1.2.4.4)	Essential gene, predicted using metabolic flux-balance analysis in LB media
FBA	Essential Gene	PATRIC	Bacillus coagulans 2-6	fig|941639.3.peg.3142	BCO26_2642	VBIBacCoa177709_3142			gatC	hypothetical protein	Essential gene, predicted using metabolic flux-balance analysis in LB media
BLASTP	Human Homolog	Human	Bacillus coagulans 2-6	fig|941639.3.peg.2540	BCO26_2156	VBIBacCoa177709_2540	XP_005248532.1	Homo sapiens		Peptidyl-prolyl cis-trans isomerase (EC 5.2.1.8)				47	89	53	3e-51
BLASTP	Human Homolog	Human	Bacillus coagulans 2-6	fig|941639.3.peg.3159	BCO26_2659	VBIBacCoa177709_3159	XP_006724053.1	Homo sapiens	purM	Phosphoribosylformylglycinamidine cyclo-ligase (EC 6.3.3.1)				33	95	50	3e-105
FBA	Essential Gene	PATRIC	Bacillus coagulans 2-6	fig|941639.3.peg.2467	BCO26_2091	VBIBacCoa177709_2467			menF	Isochorismate synthase (EC 5.4.4.2) @ Menaquinone-specific isochorismate synthase (EC 5.4.4.2)	Essential gene, predicted using metabolic flux-balance analysis in LB media
K-mer Search	Antibiotic Resistance	PATRIC	Bacillus coagulans 2-6	fig|941639.3.peg.130	BCO26_0117	VBIBacCoa177709_0130				Translation elongation factor Tu		antibiotic target in susceptible species	364475;9678602
K-mer Search	Antibiotic Resistance	PATRIC	Bacillus coagulans 2-6	fig|941639.3.peg.131	BCO26_0118	VBIBacCoa177709_0131				SSU ribosomal protein S10p (S20e)		antibiotic target in susceptible species	26124155
FBA	Essential Gene	PATRIC	Bacillus coagulans 2-6	fig|941639.3.peg.676	BCO26_0556	VBIBacCoa177709_0676				Homoserine kinase (EC 2.7.1.39)	Essential gene, predicted using metabolic flux-balance analysis in LB media
FBA	Essential Gene	PATRIC	Bacillus coagulans 2-6	fig|941639.3.peg.2056	BCO26_1733	VBIBacCoa177709_2056				hypothetical protein	Essential gene, predicted using metabolic flux-balance analysis in LB media
FBA	Essential Gene	PATRIC	Bacillus coagulans 2-6	fig|941639.3.peg.880	BCO26_0718	VBIBacCoa177709_0880				CDP-glycerol:glycerophosphate glycerophosphotransferase	Essential gene, predicted using metabolic flux-balance analysis in LB media
K-mer Search	Antibiotic Resistance	PATRIC	Bacillus coagulans 2-6	fig|941639.3.peg.129	BCO26_0116	VBIBacCoa177709_0129			fusA	Translation elongation factor G		antibiotic target in susceptible species	17980694;19289529;19289529;17325218;19289529
BLAT	Drug Target	DrugBank	Bacillus coagulans 2-6	fig|941639.3.peg.2629	BCO26_2233	VBIBacCoa177709_2629	Q06174	Geobacillus stearothermophilus		Carboxylesterase (EC 3.1.1.1)	Propyl Acetate	Drug target		100	98	80	1e-120
FBA	Essential Gene	PATRIC	Bacillus coagulans 2-6	fig|941639.3.peg.1907	BCO26_1597	VBIBacCoa177709_1907				Segregation and condensation protein B	Essential gene, predicted using metabolic flux-balance analysis in LB media
FBA	Essential Gene	PATRIC	Bacillus coagulans 2-6	fig|941639.3.peg.1433	BCO26_1190	VBIBacCoa177709_1433				Aspartate-semialdehyde dehydrogenase (EC 1.2.1.11)	Essential gene, predicted using metabolic flux-balance analysis in LB media
FBA	Essential Gene	PATRIC	Bacillus coagulans 2-6	fig|941639.3.peg.1771	BCO26_1473	VBIBacCoa177709_1771				Ornithine carbamoyltransferase (EC 2.1.3.3)	Essential gene, predicted using metabolic flux-balance analysis in LB media
K-mer Search	Antibiotic Resistance	PATRIC	Bacillus coagulans 2-6	fig|941639.3.peg.7	BCO26_0007	VBIBacCoa177709_0007				DNA gyrase subunit A (EC 5.99.1.3)		antibiotic target in susceptible species	9293187
K-mer Search	Antibiotic Resistance	PATRIC	Bacillus coagulans 2-6	fig|941639.3.peg.123	BCO26_0110	VBIBacCoa177709_0123			rpoB	DNA-directed RNA polymerase beta subunit (EC 2.7.7.6)		antibiotic target in susceptible species	3050121;15047531;16723576
BLAT	Drug Target	DrugBank	Bacillus coagulans 2-6	fig|941639.3.peg.126	BCO26_0113	VBIBacCoa177709_0126	Q5SHN3	Thermus thermophilus (strain HB8 / ATCC 27634 / DSM 579)	rpsL	SSU ribosomal protein S12p (S23e)	2-METHYLTHIO-N6-ISOPENTENYL-ADENOSINE-5'-MONOPHOSPHATE	Drug target		63	96	85	3e-35
FBA	Essential Gene	PATRIC	Bacillus coagulans 2-6	fig|941639.3.peg.2310	BCO26_1950	VBIBacCoa177709_2310				Threonyl-tRNA synthetase (EC 6.1.1.3)	Essential gene, predicted using metabolic flux-balance analysis in LB media
FBA	Essential Gene	PATRIC	Bacillus coagulans 2-6	fig|941639.3.peg.141	BCO26_0128	VBIBacCoa177709_0141			rpsQ	SSU ribosomal protein S17p (S11e)	Essential gene, predicted using metabolic flux-balance analysis in LB media
BLASTP	Human Homolog	Human	Bacillus coagulans 2-6	fig|941639.3.peg.2601	BCO26_2212	VBIBacCoa177709_2601	NP_001743.1	Homo sapiens		Catalase KatE (EC 1.11.1.6)				89	95	51	2e-165
FBA	Essential Gene	PATRIC	Bacillus coagulans 2-6	fig|941639.3.peg.140	BCO26_0127	VBIBacCoa177709_0140			rpmC	LSU ribosomal protein L29p (L35e)	Essential gene, predicted using metabolic flux-balance analysis in LB media
FBA	Essential Gene	PATRIC	Bacillus coagulans 2-6	fig|941639.3.peg.1500	BCO26_1245	VBIBacCoa177709_1500				Thymidylate synthase (EC 2.1.1.45)	Essential gene, predicted using metabolic flux-balance analysis in LB media
FBA	Essential Gene	PATRIC	Bacillus coagulans 2-6	fig|941639.3.peg.3499	BCO26_2956	VBIBacCoa177709_3499			rpsF	SSU ribosomal protein S6p	Essential gene, predicted using metabolic flux-balance analysis in LB media
FBA	Essential Gene	PATRIC	Bacillus coagulans 2-6	fig|941639.3.peg.1501	BCO26_1246	VBIBacCoa177709_1501				Dihydrofolate reductase (EC 1.5.1.3)	Essential gene, predicted using metabolic flux-balance analysis in LB media
FBA	Essential Gene	PATRIC	Bacillus coagulans 2-6	fig|941639.3.peg.147	BCO26_0133	VBIBacCoa177709_0147			rplF	LSU ribosomal protein L6p (L9e)	Essential gene, predicted using metabolic flux-balance analysis in LB media
BLASTP	Human Homolog	Human	Bacillus coagulans 2-6	fig|941639.3.peg.1500	BCO26_1245	VBIBacCoa177709_1500	NP_001062.1	Homo sapiens		Thymidylate synthase (EC 2.1.1.45)				90	98	55	1e-105
FBA	Essential Gene	PATRIC	Bacillus coagulans 2-6	fig|941639.3.peg.139	BCO26_0126	VBIBacCoa177709_0139			rplP	LSU ribosomal protein L16p (L10e)	Essential gene, predicted using metabolic flux-balance analysis in LB media
FBA	Essential Gene	PATRIC	Bacillus coagulans 2-6	fig|941639.3.peg.1332	BCO26_1097	VBIBacCoa177709_1332				Malonyl CoA-acyl carrier protein transacylase (EC 2.3.1.39)	Essential gene, predicted using metabolic flux-balance analysis in LB media
FBA	Essential Gene	PATRIC	Bacillus coagulans 2-6	fig|941639.3.peg.3487	BCO26_2947	VBIBacCoa177709_3487				Two-component response regulator SA14-24	Essential gene, predicted using metabolic flux-balance analysis in LB media
BLASTP	Human Homolog	Human	Bacillus coagulans 2-6	fig|941639.3.peg.130	BCO26_0117	VBIBacCoa177709_0130	NP_003312.3	Homo sapiens		Translation elongation factor Tu				86	99	59	4e-168
FBA	Essential Gene	PATRIC	Bacillus coagulans 2-6	fig|941639.3.peg.940	BCO26_0769	VBIBacCoa177709_0940				Substrate-specific component TrpP of tryptophan ECF transporter	Essential gene, predicted using metabolic flux-balance analysis in LB media
FBA	Essential Gene	PATRIC	Bacillus coagulans 2-6	fig|941639.3.peg.1335	BCO26_1100	VBIBacCoa177709_1335				Ribonuclease III (EC 3.1.26.3)	Essential gene, predicted using metabolic flux-balance analysis in LB media
K-mer Search	Antibiotic Resistance	PATRIC	Bacillus coagulans 2-6	fig|941639.3.peg.3515	BCO26_2969	VBIBacCoa177709_3515			gidB	16S rRNA (guanine(527)-N(7))-methyltransferase (EC 2.1.1.170)		gene conferring resistance via absence	17238915
K-mer Search	Antibiotic Resistance	PATRIC	Bacillus coagulans 2-6	fig|941639.3.peg.3303	BCO26_2790	VBIBacCoa177709_3303				UDP-N-acetylglucosamine 1-carboxyvinyltransferase (EC 2.5.1.7)		antibiotic target in susceptible species	8994972
FBA	Essential Gene	PATRIC	Bacillus coagulans 2-6	fig|941639.3.peg.3494	BCO26_2951	VBIBacCoa177709_3494				LSU ribosomal protein L9p	Essential gene, predicted using metabolic flux-balance analysis in LB media
FBA	Essential Gene	PATRIC	Bacillus coagulans 2-6	fig|941639.3.peg.953	BCO26_0777	VBIBacCoa177709_0953				Uroporphyrinogen III decarboxylase (EC 4.1.1.37)	Essential gene, predicted using metabolic flux-balance analysis in LB media
BLAT	Drug Target	DrugBank	Bacillus coagulans 2-6	fig|941639.3.peg.3319	BCO26_2802	VBIBacCoa177709_3319	Q5KUI2	Geobacillus kaustophilus (strain HTA426)		Serine hydroxymethyltransferase (EC 2.1.2.1)	(6R)-Folinic acid	Drug target		98	97	81	1e-195
FBA	Essential Gene	PATRIC	Bacillus coagulans 2-6	fig|941639.3.peg.63	BCO26_0057	VBIBacCoa177709_0063			hprT	Hypoxanthine-guanine phosphoribosyltransferase (EC 2.4.2.8)	Essential gene, predicted using metabolic flux-balance analysis in LB media
FBA	Essential Gene	PATRIC	Bacillus coagulans 2-6	fig|941639.3.peg.1453	BCO26_1207	VBIBacCoa177709_1453				CDP-diacylglycerol--glycerol-3-phosphate 3-phosphatidyltransferase (EC 2.7.8.5)	Essential gene, predicted using metabolic flux-balance analysis in LB media
FBA	Essential Gene	PATRIC	Bacillus coagulans 2-6	fig|941639.3.peg.142	BCO26_0129	VBIBacCoa177709_0142			rplN	LSU ribosomal protein L14p (L23e)	Essential gene, predicted using metabolic flux-balance analysis in LB media
FBA	Essential Gene	PATRIC	Bacillus coagulans 2-6	fig|941639.3.peg.2317	BCO26_1957	VBIBacCoa177709_2317				Dephospho-CoA kinase (EC 2.7.1.24)	Essential gene, predicted using metabolic flux-balance analysis in LB media
FBA	Essential Gene	PATRIC	Bacillus coagulans 2-6	fig|941639.3.peg.1245	BCO26_1017	VBIBacCoa177709_1245			mraY	Phospho-N-acetylmuramoyl-pentapeptide-transferase (EC 2.7.8.13)	Essential gene, predicted using metabolic flux-balance analysis in LB media
BLASTP	Human Homolog	Human	Bacillus coagulans 36D1	fig|345219.8.peg.3603	BcoaDRAFT_3566	VBIBacCoa3943_3603	NP_001924.2	Homo sapiens		Dihydrolipoamide succinyltransferase component (E2) of 2-oxoglutarate dehydrogenase complex (EC 2.3.1.61)				55	60	52	5e-82
FBA	Essential Gene	PATRIC	Bacillus coagulans 36D1	fig|345219.8.peg.2845	BcoaDRAFT_6186	VBIBacCoa3943_2845				Phenylalanyl-tRNA synthetase beta chain (EC 6.1.1.20)	Essential gene, predicted using metabolic flux-balance analysis in LB media
FBA	Essential Gene	PATRIC	Bacillus coagulans 36D1	fig|345219.8.peg.2775	BcoaDRAFT_6125	VBIBacCoa3943_2775				DNA polymerase III alpha subunit (EC 2.7.7.7)	Essential gene, predicted using metabolic flux-balance analysis in LB media
FBA	Essential Gene	PATRIC	Bacillus coagulans 36D1	fig|345219.8.peg.2269	BcoaDRAFT_5663	VBIBacCoa3943_2269				Acetolactate synthase small subunit (EC 2.2.1.6)	Essential gene, predicted using metabolic flux-balance analysis in LB media
FBA	Essential Gene	PATRIC	Bacillus coagulans 36D1	fig|345219.8.peg.3271	BcoaDRAFT_3268	VBIBacCoa3943_3271				DNA-binding protein HBsu	Essential gene, predicted using metabolic flux-balance analysis in LB media
FBA	Essential Gene	PATRIC	Bacillus coagulans 36D1	fig|345219.8.peg.107	BcoaDRAFT_3754	VBIBacCoa3943_0107				UDP-N-acetylglucosamine--N-acetylmuramyl-(pentapeptide) pyrophosphoryl-undecaprenol N-acetylglucosamine transferase (EC 2.4.1.227)	Essential gene, predicted using metabolic flux-balance analysis in LB media
FBA	Essential Gene	PATRIC	Bacillus coagulans 36D1	fig|345219.8.peg.3050	BcoaDRAFT_3069	VBIBacCoa3943_3050				DNA polymerase III delta subunit (EC 2.7.7.7)	Essential gene, predicted using metabolic flux-balance analysis in LB media
FBA	Essential Gene	PATRIC	Bacillus coagulans 36D1	fig|345219.8.peg.2810	BcoaDRAFT_6156	VBIBacCoa3943_2810				Helicase loader DnaI	Essential gene, predicted using metabolic flux-balance analysis in LB media
FBA	Essential Gene	PATRIC	Bacillus coagulans 36D1	fig|345219.8.peg.1407	BcoaDRAFT_4881	VBIBacCoa3943_1407				LSU ribosomal protein L34p	Essential gene, predicted using metabolic flux-balance analysis in LB media
FBA	Essential Gene	PATRIC	Bacillus coagulans 36D1	fig|345219.8.peg.3224	BcoaDRAFT_3225	VBIBacCoa3943_3224				Diaminopimelate decarboxylase (EC 4.1.1.20)	Essential gene, predicted using metabolic flux-balance analysis in LB media
FBA	Essential Gene	PATRIC	Bacillus coagulans 36D1	fig|345219.8.peg.2712	BcoaDRAFT_6068	VBIBacCoa3943_2712				UDP-N-acetylmuramate--L-alanine ligase (EC 6.3.2.8)	Essential gene, predicted using metabolic flux-balance analysis in LB media
FBA	Essential Gene	PATRIC	Bacillus coagulans 36D1	fig|345219.8.peg.1285	BcoaDRAFT_4761	VBIBacCoa3943_1285				SSU ribosomal protein S10p (S20e)	Essential gene, predicted using metabolic flux-balance analysis in LB media
FBA	Essential Gene	PATRIC	Bacillus coagulans 36D1	fig|345219.8.peg.2844	BcoaDRAFT_6185	VBIBacCoa3943_2844				Phenylalanyl-tRNA synthetase alpha chain (EC 6.1.1.20)	Essential gene, predicted using metabolic flux-balance analysis in LB media
BLASTP	Human Homolog	Human	Bacillus coagulans 36D1	fig|345219.8.peg.3058	BcoaDRAFT_3077	VBIBacCoa3943_3058	NP_004125.3	Homo sapiens		Chaperone protein DnaK				91	97	55	0
BLASTP	Human Homolog	Human	Bacillus coagulans 36D1	fig|345219.8.peg.1536	BcoaDRAFT_4999	VBIBacCoa3943_1536	NP_003353.1	Homo sapiens		Uracil-DNA glycosylase, family 1 (EC 3.2.2.27)				71	95	52	8e-70
FBA	Essential Gene	PATRIC	Bacillus coagulans 36D1	fig|345219.8.peg.1797	BcoaDRAFT_5232	VBIBacCoa3943_1797				Aspartyl-tRNA(Asn) amidotransferase subunit B (EC 6.3.5.6) @ Glutamyl-tRNA(Gln) amidotransferase subunit B (EC 6.3.5.7)	Essential gene, predicted using metabolic flux-balance analysis in LB media
BLAT	Transporter	TCDB	Bacillus coagulans 36D1	fig|345219.8.peg.3291	BcoaDRAFT_3285	VBIBacCoa3943_3291	P46912	Bacillus subtilis		Menaquinone-cytochrome c reductase, cytochrome B subunit	the proton-translocating quinol:cytochrome c reductase (qcr) superfamily.	3.D.3.4.1	7592464;8760912;9384377;9535866	100	100	89	1e-119
FBA	Essential Gene	PATRIC	Bacillus coagulans 36D1	fig|345219.8.peg.1269	BcoaDRAFT_4745	VBIBacCoa3943_1269				LSU ribosomal protein L6p (L9e)	Essential gene, predicted using metabolic flux-balance analysis in LB media
K-mer Search	Antibiotic Resistance	PATRIC	Bacillus coagulans 36D1	fig|345219.8.peg.3550	BcoaDRAFT_3522	VBIBacCoa3943_3550				Bacitracin export permease protein BceB		efflux pump conferring antibiotic resistance	25118291
K-mer Search	Antibiotic Resistance	PATRIC	Bacillus coagulans 36D1	fig|345219.8.peg.1292	BcoaDRAFT_4768	VBIBacCoa3943_1292				DNA-directed RNA polymerase beta' subunit (EC 2.7.7.6)		antibiotic target in susceptible species	16723576
FBA	Essential Gene	PATRIC	Bacillus coagulans 36D1	fig|345219.8.peg.42	BcoaDRAFT_3695	VBIBacCoa3943_0042				Helicase PriA essential for oriC/DnaA-independent DNA replication	Essential gene, predicted using metabolic flux-balance analysis in LB media
FBA	Essential Gene	PATRIC	Bacillus coagulans 36D1	fig|345219.8.peg.45	BcoaDRAFT_3698	VBIBacCoa3943_0045				Guanylate kinase (EC 2.7.4.8)	Essential gene, predicted using metabolic flux-balance analysis in LB media
FBA	Essential Gene	PATRIC	Bacillus coagulans 36D1	fig|345219.8.peg.1394	BcoaDRAFT_4868	VBIBacCoa3943_1394				Thymidylate kinase (EC 2.7.4.9)	Essential gene, predicted using metabolic flux-balance analysis in LB media
FBA	Essential Gene	PATRIC	Bacillus coagulans 36D1	fig|345219.8.peg.1283	BcoaDRAFT_4759	VBIBacCoa3943_1283				LSU ribosomal protein L4p (L1e)	Essential gene, predicted using metabolic flux-balance analysis in LB media
BLAT	Drug Target	DrugBank	Bacillus coagulans 36D1	fig|345219.8.peg.2446	BcoaDRAFT_5826	VBIBacCoa3943_2446	P00362	Geobacillus stearothermophilus		NAD-dependent glyceraldehyde-3-phosphate dehydrogenase (EC 1.2.1.12)	Glyceraldehyde-3-Phosphate	Drug target		100	100	84	1e-160
FBA	Essential Gene	PATRIC	Bacillus coagulans 36D1	fig|345219.8.peg.3041	BcoaDRAFT_6361	VBIBacCoa3943_3041				Nicotinate-nucleotide adenylyltransferase (EC 2.7.7.18)	Essential gene, predicted using metabolic flux-balance analysis in LB media
FBA	Essential Gene	PATRIC	Bacillus coagulans 36D1	fig|345219.8.peg.1698	BcoaDRAFT_5137	VBIBacCoa3943_1698				NAD synthetase (EC 6.3.1.5)	Essential gene, predicted using metabolic flux-balance analysis in LB media
FBA	Essential Gene	PATRIC	Bacillus coagulans 36D1	fig|345219.8.peg.1290	BcoaDRAFT_4766	VBIBacCoa3943_1290				SSU ribosomal protein S12p (S23e)	Essential gene, predicted using metabolic flux-balance analysis in LB media
FBA	Essential Gene	PATRIC	Bacillus coagulans 36D1	fig|345219.8.peg.1266	BcoaDRAFT_4742	VBIBacCoa3943_1266				LSU ribosomal protein L30p (L7e)	Essential gene, predicted using metabolic flux-balance analysis in LB media
FBA	Essential Gene	PATRIC	Bacillus coagulans 36D1	fig|345219.8.peg.2907	BcoaDRAFT_6239	VBIBacCoa3943_2907				Valyl-tRNA synthetase (EC 6.1.1.9)	Essential gene, predicted using metabolic flux-balance analysis in LB media
FBA	Essential Gene	PATRIC	Bacillus coagulans 36D1	fig|345219.8.peg.522	BcoaDRAFT_4090	VBIBacCoa3943_0522				Gamma-glutamyltranspeptidase (EC 2.3.2.2) @ Glutathione hydrolase (EC 3.4.19.13)	Essential gene, predicted using metabolic flux-balance analysis in LB media
BLASTP	Human Homolog	Human	Bacillus coagulans 36D1	fig|345219.8.peg.1608	BcoaDRAFT_5060	VBIBacCoa3943_1608	NP_001677.2	Homo sapiens		ATP synthase beta chain (EC 3.6.3.14)				87	98	68	0
FBA	Essential Gene	PATRIC	Bacillus coagulans 36D1	fig|345219.8.peg.1280	BcoaDRAFT_4756	VBIBacCoa3943_1280				SSU ribosomal protein S19p (S15e)	Essential gene, predicted using metabolic flux-balance analysis in LB media
FBA	Essential Gene	PATRIC	Bacillus coagulans 36D1	fig|345219.8.peg.415	BcoaDRAFT_4004	VBIBacCoa3943_0415				Substrate-specific component TrpP of tryptophan ECF transporter	Essential gene, predicted using metabolic flux-balance analysis in LB media
FBA	Essential Gene	PATRIC	Bacillus coagulans 36D1	fig|345219.8.peg.3751	BcoaDRAFT_3042	VBIBacCoa3943_3751				SSU ribosomal protein S2p (SAe)	Essential gene, predicted using metabolic flux-balance analysis in LB media
FBA	Essential Gene	PATRIC	Bacillus coagulans 36D1	fig|345219.8.peg.1205	BcoaDRAFT_4684	VBIBacCoa3943_1205				Isochorismatase (EC 3.3.2.1)	Essential gene, predicted using metabolic flux-balance analysis in LB media
FBA	Essential Gene	PATRIC	Bacillus coagulans 36D1	fig|345219.8.peg.1256	BcoaDRAFT_4733	VBIBacCoa3943_1256				LSU ribosomal protein L17p	Essential gene, predicted using metabolic flux-balance analysis in LB media
K-mer Search	Antibiotic Resistance	PATRIC	Bacillus coagulans 36D1	fig|345219.8.peg.1398	BcoaDRAFT_4874	VBIBacCoa3943_1398				DNA gyrase subunit A (EC 5.99.1.3)		antibiotic target in susceptible species	9293187
FBA	Essential Gene	PATRIC	Bacillus coagulans 36D1	fig|345219.8.peg.2652	BcoaDRAFT_6015	VBIBacCoa3943_2652				O-succinylbenzoate synthase (EC 4.2.1.113)	Essential gene, predicted using metabolic flux-balance analysis in LB media
FBA	Essential Gene	PATRIC	Bacillus coagulans 36D1	fig|345219.8.peg.112	BcoaDRAFT_3759	VBIBacCoa3943_0112				UDP-N-acetylmuramoyl-dipeptide--2,6-diaminopimelate ligase (EC 6.3.2.13)	Essential gene, predicted using metabolic flux-balance analysis in LB media
BLASTP	Human Homolog	Human	Bacillus coagulans 36D1	fig|345219.8.peg.1689	BcoaDRAFT_5130	VBIBacCoa3943_1689	XP_005246575.1	Homo sapiens		Heat shock protein 60 kDa family chaperone GroEL				91	96	52	0
FBA	Essential Gene	PATRIC	Bacillus coagulans 36D1	fig|345219.8.peg.996	BcoaDRAFT_4498	VBIBacCoa3943_0996				Undecaprenyl-diphosphatase (EC 3.6.1.27)	Essential gene, predicted using metabolic flux-balance analysis in LB media
FBA	Essential Gene	PATRIC	Bacillus coagulans 36D1	fig|345219.8.peg.89	BcoaDRAFT_3738	VBIBacCoa3943_0089				Isoleucyl-tRNA synthetase (EC 6.1.1.5)	Essential gene, predicted using metabolic flux-balance analysis in LB media
FBA	Essential Gene	PATRIC	Bacillus coagulans 36D1	fig|345219.8.peg.1346	BcoaDRAFT_4825	VBIBacCoa3943_1346				Hypoxanthine-guanine phosphoribosyltransferase (EC 2.4.2.8)	Essential gene, predicted using metabolic flux-balance analysis in LB media
FBA	Essential Gene	PATRIC	Bacillus coagulans 36D1	fig|345219.8.peg.110	BcoaDRAFT_3757	VBIBacCoa3943_0110				Phospho-N-acetylmuramoyl-pentapeptide-transferase (EC 2.7.8.13)	Essential gene, predicted using metabolic flux-balance analysis in LB media
FBA	Essential Gene	PATRIC	Bacillus coagulans 36D1	fig|345219.8.peg.1408	BcoaDRAFT_4882	VBIBacCoa3943_1408				Ribonuclease P protein component (EC 3.1.26.5)	Essential gene, predicted using metabolic flux-balance analysis in LB media
FBA	Essential Gene	PATRIC	Bacillus coagulans 36D1	fig|345219.8.peg.1437	BcoaDRAFT_4907	VBIBacCoa3943_1437				Adenylosuccinate synthetase (EC 6.3.4.4)	Essential gene, predicted using metabolic flux-balance analysis in LB media
BLASTP	Human Homolog	Human	Bacillus coagulans 36D1	fig|345219.8.peg.1868	BcoaDRAFT_5295	VBIBacCoa3943_1868	NP_001776.1	Homo sapiens		Cytidine deaminase (EC 3.5.4.5)				87	98	51	3e-36
BLASTP	Human Homolog	Human	Bacillus coagulans 36D1	fig|345219.8.peg.3161	BcoaDRAFT_3170	VBIBacCoa3943_3161	XP_005254116.1	Homo sapiens		Biotin carboxylase of acetyl-CoA carboxylase (EC 6.3.4.14)				68	97	51	8e-151
FBA	Essential Gene	PATRIC	Bacillus coagulans 36D1	fig|345219.8.peg.2192	BcoaDRAFT_5583	VBIBacCoa3943_2192				Ca(2+)/H(+) antiporter	Essential gene, predicted using metabolic flux-balance analysis in LB media
FBA	Essential Gene	PATRIC	Bacillus coagulans 36D1	fig|345219.8.peg.1366	BcoaDRAFT_4842	VBIBacCoa3943_1366				Ribose-phosphate pyrophosphokinase (EC 2.7.6.1)	Essential gene, predicted using metabolic flux-balance analysis in LB media
FBA	Essential Gene	PATRIC	Bacillus coagulans 36D1	fig|345219.8.peg.3055	BcoaDRAFT_3074	VBIBacCoa3943_3055				Oxygen-independent coproporphyrinogen-III oxidase-like protein YggW	Essential gene, predicted using metabolic flux-balance analysis in LB media
BLASTP	Human Homolog	Human	Bacillus coagulans 36D1	fig|345219.8.peg.3438	BcoaDRAFT_3417	VBIBacCoa3943_3438	NP_542407.2	Homo sapiens		O-acetyl-ADP-ribose deacetylase				38	84	54	3e-48
FBA	Essential Gene	PATRIC	Bacillus coagulans 36D1	fig|345219.8.peg.1275	BcoaDRAFT_4751	VBIBacCoa3943_1275				SSU ribosomal protein S17p (S11e)	Essential gene, predicted using metabolic flux-balance analysis in LB media
FBA	Essential Gene	PATRIC	Bacillus coagulans 36D1	fig|345219.8.peg.3772	BcoaDRAFT_3060	VBIBacCoa3943_3772				FMN adenylyltransferase (EC 2.7.7.2) / Riboflavin kinase (EC 2.7.1.26)	Essential gene, predicted using metabolic flux-balance analysis in LB media
FBA	Essential Gene	PATRIC	Bacillus coagulans 36D1	fig|345219.8.peg.1696	BcoaDRAFT_5136	VBIBacCoa3943_1696				Nicotinate phosphoribosyltransferase (EC 6.3.4.21)	Essential gene, predicted using metabolic flux-balance analysis in LB media
FBA	Essential Gene	PATRIC	Bacillus coagulans 36D1	fig|345219.8.peg.1245	BcoaDRAFT_4722	VBIBacCoa3943_1245				Adenylylsulfate kinase (EC 2.7.1.25)	Essential gene, predicted using metabolic flux-balance analysis in LB media
FBA	Essential Gene	PATRIC	Bacillus coagulans 36D1	fig|345219.8.peg.19	BcoaDRAFT_3674	VBIBacCoa3943_0019				Chromosome partition protein smc	Essential gene, predicted using metabolic flux-balance analysis in LB media
FBA	Essential Gene	PATRIC	Bacillus coagulans 36D1	fig|345219.8.peg.2287	BcoaDRAFT_5680	VBIBacCoa3943_2287				hypothetical protein	Essential gene, predicted using metabolic flux-balance analysis in LB media
FBA	Essential Gene	PATRIC	Bacillus coagulans 36D1	fig|345219.8.peg.2747	BcoaDRAFT_6099	VBIBacCoa3943_2747				SSU ribosomal protein S4p (S9e) @ SSU ribosomal protein S4p (S9e), zinc-independent	Essential gene, predicted using metabolic flux-balance analysis in LB media
FBA	Essential Gene	PATRIC	Bacillus coagulans 36D1	fig|345219.8.peg.1771	BcoaDRAFT_5209	VBIBacCoa3943_1771				Adenylosuccinate lyase (EC 4.3.2.2) @ SAICAR lyase (EC 4.3.2.2)	Essential gene, predicted using metabolic flux-balance analysis in LB media
FBA	Essential Gene	PATRIC	Bacillus coagulans 36D1	fig|345219.8.peg.2170	BcoaDRAFT_5564	VBIBacCoa3943_2170				Cystathionine beta-synthase (EC 4.2.1.22)	Essential gene, predicted using metabolic flux-balance analysis in LB media
FBA	Essential Gene	PATRIC	Bacillus coagulans 36D1	fig|345219.8.peg.1347	BcoaDRAFT_4826	VBIBacCoa3943_1347				tRNA(Ile)-lysidine synthetase (EC 6.3.4.19)	Essential gene, predicted using metabolic flux-balance analysis in LB media
FBA	Essential Gene	PATRIC	Bacillus coagulans 36D1	fig|345219.8.peg.405	BcoaDRAFT_3996	VBIBacCoa3943_0405				Coproporphyrin ferrochelatase (EC 4.99.1.9)	Essential gene, predicted using metabolic flux-balance analysis in LB media
FBA	Essential Gene	PATRIC	Bacillus coagulans 36D1	fig|345219.8.peg.3080	BcoaDRAFT_3097	VBIBacCoa3943_3080				DNA primase DnaG	Essential gene, predicted using metabolic flux-balance analysis in LB media
BLASTP	Human Homolog	Human	Bacillus coagulans 36D1	fig|345219.8.peg.2446	BcoaDRAFT_5826	VBIBacCoa3943_2446	NP_002037.2	Homo sapiens		NAD-dependent glyceraldehyde-3-phosphate dehydrogenase (EC 1.2.1.12)				98	98	52	8e-117
BLASTP	Human Homolog	Human	Bacillus coagulans 36D1	fig|345219.8.peg.447	BcoaDRAFT_4030	VBIBacCoa3943_0447	NP_000134.2	Homo sapiens		Fumarate hydratase class II (EC 4.2.1.2)				89	98	59	0
FBA	Essential Gene	PATRIC	Bacillus coagulans 36D1	fig|345219.8.peg.3283	BcoaDRAFT_3279	VBIBacCoa3943_3283				Prephenate dehydrogenase (EC 1.3.1.12)	Essential gene, predicted using metabolic flux-balance analysis in LB media
FBA	Essential Gene	PATRIC	Bacillus coagulans 36D1	fig|345219.8.peg.353	BcoaDRAFT_3953	VBIBacCoa3943_0353				3-oxoacyl-[acyl-carrier-protein] synthase, KASIII (EC 2.3.1.180)	Essential gene, predicted using metabolic flux-balance analysis in LB media
FBA	Essential Gene	PATRIC	Bacillus coagulans 36D1	fig|345219.8.peg.3182	BcoaDRAFT_3189	VBIBacCoa3943_3182				Branched-chain alpha-keto acid dehydrogenase, E1 component, alpha subunit (EC 1.2.4.4)	Essential gene, predicted using metabolic flux-balance analysis in LB media
FBA	Essential Gene	PATRIC	Bacillus coagulans 36D1	fig|345219.8.peg.3372	BcoaDRAFT_3357	VBIBacCoa3943_3372				Ornithine carbamoyltransferase (EC 2.1.3.3)	Essential gene, predicted using metabolic flux-balance analysis in LB media
FBA	Essential Gene	PATRIC	Bacillus coagulans 36D1	fig|345219.8.peg.3692	BcoaDRAFT_3641	VBIBacCoa3943_3692				CDP-diacylglycerol--glycerol-3-phosphate 3-phosphatidyltransferase (EC 2.7.8.5)	Essential gene, predicted using metabolic flux-balance analysis in LB media
BLASTP	Human Homolog	Human	Bacillus coagulans 36D1	fig|345219.8.peg.2668	BcoaDRAFT_6031	VBIBacCoa3943_2668	XP_005269899.1	Homo sapiens		S-adenosylmethionine synthetase (EC 2.5.1.6)				94	95	58	1e-149
FBA	Essential Gene	PATRIC	Bacillus coagulans 36D1	fig|345219.8.peg.3642	BcoaDRAFT_3600	VBIBacCoa3943_3642				Dihydrofolate reductase (EC 1.5.1.3)	Essential gene, predicted using metabolic flux-balance analysis in LB media
FBA	Essential Gene	PATRIC	Bacillus coagulans 36D1	fig|345219.8.peg.3081	BcoaDRAFT_3098	VBIBacCoa3943_3081				RNA polymerase sigma factor RpoD	Essential gene, predicted using metabolic flux-balance analysis in LB media
BLASTP	Human Homolog	Human	Bacillus coagulans 36D1	fig|345219.8.peg.1121	BcoaDRAFT_4608	VBIBacCoa3943_1121	NP_079523.3	Homo sapiens		Acyl-CoA dehydrogenase				37	95	60	8e-167
BLASTP	Human Homolog	Human	Bacillus coagulans 36D1	fig|345219.8.peg.1777	BcoaDRAFT_5215	VBIBacCoa3943_1777	XP_006724053.1	Homo sapiens		Phosphoribosylformylglycinamidine cyclo-ligase (EC 6.3.3.1)				33	95	51	2e-105
K-mer Search	Antibiotic Resistance	PATRIC	Bacillus coagulans 36D1	fig|345219.8.peg.1413	BcoaDRAFT_4887	VBIBacCoa3943_1413				16S rRNA (guanine(527)-N(7))-methyltransferase (EC 2.1.1.170)		gene conferring resistance via absence	17238915
FBA	Essential Gene	PATRIC	Bacillus coagulans 36D1	fig|345219.8.peg.1398	BcoaDRAFT_4874	VBIBacCoa3943_1398				DNA gyrase subunit A (EC 5.99.1.3)	Essential gene, predicted using metabolic flux-balance analysis in LB media
BLASTP	Human Homolog	Human	Bacillus coagulans 36D1	fig|345219.8.peg.1245	BcoaDRAFT_4722	VBIBacCoa3943_1245	NP_005434.4	Homo sapiens		Adenylylsulfate kinase (EC 2.7.1.25)				32	99	52	7e-67
FBA	Essential Gene	PATRIC	Bacillus coagulans 36D1	fig|345219.8.peg.3757	BcoaDRAFT_3046	VBIBacCoa3943_3757				Undecaprenyl diphosphate synthase (EC 2.5.1.31)	Essential gene, predicted using metabolic flux-balance analysis in LB media
FBA	Essential Gene	PATRIC	Bacillus coagulans 36D1	fig|345219.8.peg.1439	BcoaDRAFT_4908	VBIBacCoa3943_1439				Two-component response regulator SA14-24	Essential gene, predicted using metabolic flux-balance analysis in LB media
BLASTP	Human Homolog	Human	Bacillus coagulans 36D1	fig|345219.8.peg.1287	BcoaDRAFT_4763	VBIBacCoa3943_1287	NP_003312.3	Homo sapiens		Translation elongation factor Tu				85	98	58	4e-167
FBA	Essential Gene	PATRIC	Bacillus coagulans 36D1	fig|345219.8.peg.1273	BcoaDRAFT_4749	VBIBacCoa3943_1273				LSU ribosomal protein L24p (L26e)	Essential gene, predicted using metabolic flux-balance analysis in LB media
FBA	Essential Gene	PATRIC	Bacillus coagulans 36D1	fig|345219.8.peg.2715	BcoaDRAFT_6071	VBIBacCoa3943_2715				Chorismate mutase I (EC 5.4.99.5) / 2-keto-3-deoxy-D-arabino-heptulosonate-7-phosphate synthase I beta (EC 2.5.1.54)	Essential gene, predicted using metabolic flux-balance analysis in LB media
BLASTP	Human Homolog	Human	Bacillus coagulans 36D1	fig|345219.8.peg.1111	BcoaDRAFT_4597	VBIBacCoa3943_1111	NP_001071.1	Homo sapiens		Succinate-semialdehyde dehydrogenase [NAD(P)+] (EC 1.2.1.16)				87	98	53	6e-161
BLASTP	Human Homolog	Human	Bacillus coagulans 36D1	fig|345219.8.peg.352	BcoaDRAFT_3952	VBIBacCoa3943_0352	XP_006713279.1	Homo sapiens		3-oxoacyl-[acyl-carrier-protein] synthase, KASII (EC 2.3.1.179)				90	98	50	2e-131
K-mer Search	Antibiotic Resistance	PATRIC	Bacillus coagulans 36D1	fig|345219.8.peg.1637	BcoaDRAFT_5084	VBIBacCoa3943_1637				D-alanine--D-alanine ligase (EC 6.3.2.4)		antibiotic target in susceptible species	24303782;24033232
FBA	Essential Gene	PATRIC	Bacillus coagulans 36D1	fig|345219.8.peg.1270	BcoaDRAFT_4746	VBIBacCoa3943_1270				SSU ribosomal protein S8p (S15Ae)	Essential gene, predicted using metabolic flux-balance analysis in LB media
FBA	Essential Gene	PATRIC	Bacillus coagulans 36D1	fig|345219.8.peg.742	BcoaDRAFT_4277	VBIBacCoa3943_0742				Cystathionine gamma-synthase (EC 2.5.1.48)	Essential gene, predicted using metabolic flux-balance analysis in LB media
FBA	Essential Gene	PATRIC	Bacillus coagulans 36D1	fig|345219.8.peg.1251	BcoaDRAFT_4728	VBIBacCoa3943_1251				LSU ribosomal protein L13p (L13Ae)	Essential gene, predicted using metabolic flux-balance analysis in LB media
FBA	Essential Gene	PATRIC	Bacillus coagulans 36D1	fig|345219.8.peg.3758	BcoaDRAFT_3047	VBIBacCoa3943_3758				Phosphatidate cytidylyltransferase (EC 2.7.7.41)	Essential gene, predicted using metabolic flux-balance analysis in LB media
K-mer Search	Antibiotic Resistance	PATRIC	Bacillus coagulans 36D1	fig|345219.8.peg.1661	BcoaDRAFT_5103	VBIBacCoa3943_1661				Alanine racemase (EC 5.1.1.1)		antibiotic target in susceptible species	19748470;24303782
FBA	Essential Gene	PATRIC	Bacillus coagulans 36D1	fig|345219.8.peg.3280	BcoaDRAFT_3276	VBIBacCoa3943_3280				3-dehydroquinate synthase (EC 4.2.3.4)	Essential gene, predicted using metabolic flux-balance analysis in LB media
FBA	Essential Gene	PATRIC	Bacillus coagulans 36D1	fig|345219.8.peg.32	BcoaDRAFT_3686	VBIBacCoa3943_0032				LSU ribosomal protein L28p @ LSU ribosomal protein L28p, zinc-independent	Essential gene, predicted using metabolic flux-balance analysis in LB media
BLAT	Drug Target	TTD	Bacillus coagulans 36D1	fig|345219.8.peg.1287	BcoaDRAFT_4763	VBIBacCoa3943_1287	TTDI02058			Translation elongation factor Tu				98	98	85	1e-197
FBA	Essential Gene	PATRIC	Bacillus coagulans 36D1	fig|345219.8.peg.3373	BcoaDRAFT_3358	VBIBacCoa3943_3373				Argininosuccinate synthase (EC 6.3.4.5)	Essential gene, predicted using metabolic flux-balance analysis in LB media
FBA	Essential Gene	PATRIC	Bacillus coagulans 36D1	fig|345219.8.peg.317	BcoaDRAFT_3923	VBIBacCoa3943_0317				NAD kinase (EC 2.7.1.23)	Essential gene, predicted using metabolic flux-balance analysis in LB media
FBA	Essential Gene	PATRIC	Bacillus coagulans 36D1	fig|345219.8.peg.1325	BcoaDRAFT_4802	VBIBacCoa3943_1325				DNA polymerase III subunits gamma and tau (EC 2.7.7.7)	Essential gene, predicted using metabolic flux-balance analysis in LB media
FBA	Essential Gene	PATRIC	Bacillus coagulans 36D1	fig|345219.8.peg.136	BcoaDRAFT_3775	VBIBacCoa3943_0136				Phosphopantetheine adenylyltransferase (EC 2.7.7.3)	Essential gene, predicted using metabolic flux-balance analysis in LB media
K-mer Search	Antibiotic Resistance	PATRIC	Bacillus coagulans 36D1	fig|345219.8.peg.1288	BcoaDRAFT_4764	VBIBacCoa3943_1288				Translation elongation factor G		antibiotic target in susceptible species	17980694;19289529;19289529;17325218;19289529
FBA	Essential Gene	PATRIC	Bacillus coagulans 36D1	fig|345219.8.peg.479	BcoaDRAFT_4052	VBIBacCoa3943_0479				Glycerol-3-phosphate cytidylyltransferase (EC 2.7.7.39)	Essential gene, predicted using metabolic flux-balance analysis in LB media
BLAT	Virulence Factor	Victors	Bacillus coagulans 36D1	fig|345219.8.peg.3716	BcoaDRAFT_3009	VBIBacCoa3943_3716	227813264	Bacillus anthracis str. CDC 684		GTP-sensing transcriptional pleiotropic repressor CodY			19651859	98	98	82	1e-115
FBA	Essential Gene	PATRIC	Bacillus coagulans 36D1	fig|345219.8.peg.3765	BcoaDRAFT_3053	VBIBacCoa3943_3765				Transcription termination protein NusA	Essential gene, predicted using metabolic flux-balance analysis in LB media
FBA	Essential Gene	PATRIC	Bacillus coagulans 36D1	fig|345219.8.peg.1260	BcoaDRAFT_4737	VBIBacCoa3943_1260				LSU ribosomal protein L36p @ LSU ribosomal protein L36p, zinc-dependent	Essential gene, predicted using metabolic flux-balance analysis in LB media
FBA	Essential Gene	PATRIC	Bacillus coagulans 36D1	fig|345219.8.peg.2268	BcoaDRAFT_5662	VBIBacCoa3943_2268				Acetolactate synthase large subunit (EC 2.2.1.6)	Essential gene, predicted using metabolic flux-balance analysis in LB media
FBA	Essential Gene	PATRIC	Bacillus coagulans 36D1	fig|345219.8.peg.109	BcoaDRAFT_3756	VBIBacCoa3943_0109				UDP-N-acetylmuramoyl-L-alanine--D-glutamate ligase (EC 6.3.2.9)	Essential gene, predicted using metabolic flux-balance analysis in LB media
FBA	Essential Gene	PATRIC	Bacillus coagulans 36D1	fig|345219.8.peg.3073	BcoaDRAFT_3091	VBIBacCoa3943_3073				hypothetical protein	Essential gene, predicted using metabolic flux-balance analysis in LB media
FBA	Essential Gene	PATRIC	Bacillus coagulans 36D1	fig|345219.8.peg.1796	BcoaDRAFT_5231	VBIBacCoa3943_1796				Aspartyl-tRNA(Asn) amidotransferase subunit A (EC 6.3.5.6) @ Glutamyl-tRNA(Gln) amidotransferase subunit A (EC 6.3.5.7)	Essential gene, predicted using metabolic flux-balance analysis in LB media
FBA	Essential Gene	PATRIC	Bacillus coagulans 36D1	fig|345219.8.peg.1282	BcoaDRAFT_4758	VBIBacCoa3943_1282				LSU ribosomal protein L23p (L23Ae)	Essential gene, predicted using metabolic flux-balance analysis in LB media
K-mer Search	Antibiotic Resistance	PATRIC	Bacillus coagulans 36D1	fig|345219.8.peg.1136	BcoaDRAFT_4621	VBIBacCoa3943_1136				Broad-specificity multidrug efflux pump YkkC		efflux pump conferring antibiotic resistance	10735877
FBA	Essential Gene	PATRIC	Bacillus coagulans 36D1	fig|345219.8.peg.3284	BcoaDRAFT_3280	VBIBacCoa3943_3284				3-phosphoshikimate 1-carboxyvinyltransferase (EC 2.5.1.19)	Essential gene, predicted using metabolic flux-balance analysis in LB media
FBA	Essential Gene	PATRIC	Bacillus coagulans 36D1	fig|345219.8.peg.2970	BcoaDRAFT_6300	VBIBacCoa3943_2970				Aspartyl-tRNA synthetase (EC 6.1.1.12)	Essential gene, predicted using metabolic flux-balance analysis in LB media
K-mer Search	Antibiotic Resistance	PATRIC	Bacillus coagulans 36D1	fig|345219.8.peg.3175	BcoaDRAFT_3183	VBIBacCoa3943_3175				Glycerophosphoryl diester phosphodiesterase (EC 3.1.4.46)		protein altering cell wall charge conferring antibiotic resistance	21899450
BLAT	Drug Target	DrugBank	Bacillus coagulans 36D1	fig|345219.8.peg.1600	BcoaDRAFT_5051	VBIBacCoa3943_1600	Q5KUI3	Geobacillus kaustophilus (strain HTA426)		Uracil phosphoribosyltransferase (EC 2.4.2.9)	Uridine-5'-Monophosphate	Drug target		97	97	83	3e-99
FBA	Essential Gene	PATRIC	Bacillus coagulans 36D1	fig|345219.8.peg.3575	BcoaDRAFT_3541	VBIBacCoa3943_3575				Phosphoribosyl-AMP cyclohydrolase (EC 3.5.4.19) / Phosphoribosyl-ATP pyrophosphatase (EC 3.6.1.31)	Essential gene, predicted using metabolic flux-balance analysis in LB media
K-mer Search	Antibiotic Resistance	PATRIC	Bacillus coagulans 36D1	fig|345219.8.peg.3692	BcoaDRAFT_3641	VBIBacCoa3943_3692				CDP-diacylglycerol--glycerol-3-phosphate 3-phosphatidyltransferase (EC 2.7.8.5)		protein altering cell wall charge conferring antibiotic resistance	22238576
K-mer Search	Antibiotic Resistance	PATRIC	Bacillus coagulans 36D1	fig|345219.8.peg.3549	BcoaDRAFT_3521	VBIBacCoa3943_3549				Bacitracin export ATP-binding protein BceA		efflux pump conferring antibiotic resistance	25118291
BLASTP	Human Homolog	Human	Bacillus coagulans 36D1	fig|345219.8.peg.3643	BcoaDRAFT_3601	VBIBacCoa3943_3643	NP_001062.1	Homo sapiens		Thymidylate synthase (EC 2.1.1.45)				90	98	55	2e-105
FBA	Essential Gene	PATRIC	Bacillus coagulans 36D1	fig|345219.8.peg.476	BcoaDRAFT_4050	VBIBacCoa3943_0476				CDP-glycerol:poly(glycerophosphate) glycerophosphotransferase (EC 2.7.8.12)	Essential gene, predicted using metabolic flux-balance analysis in LB media
FBA	Essential Gene	PATRIC	Bacillus coagulans 36D1	fig|345219.8.peg.3509	BcoaDRAFT_3481	VBIBacCoa3943_3509				DNA topoisomerase IV subunit A (EC 5.99.1.3)	Essential gene, predicted using metabolic flux-balance analysis in LB media
FBA	Essential Gene	PATRIC	Bacillus coagulans 36D1	fig|345219.8.peg.1276	BcoaDRAFT_4752	VBIBacCoa3943_1276				LSU ribosomal protein L29p (L35e)	Essential gene, predicted using metabolic flux-balance analysis in LB media
BLASTP	Human Homolog	Human	Bacillus coagulans 36D1	fig|345219.8.peg.1	BcoaDRAFT_3658	VBIBacCoa3943_0001	NP_003840.2	Homo sapiens		Succinyl-CoA ligase [ADP-forming] alpha chain (EC 6.2.1.5)				86	95	61	3e-105
FBA	Essential Gene	PATRIC	Bacillus coagulans 36D1	fig|345219.8.peg.2935	BcoaDRAFT_6267	VBIBacCoa3943_2935				LSU ribosomal protein L21p	Essential gene, predicted using metabolic flux-balance analysis in LB media
K-mer Search	Antibiotic Resistance	PATRIC	Bacillus coagulans 36D1	fig|345219.8.peg.3548	BcoaDRAFT_3520	VBIBacCoa3943_3548				Two-component sensor histidine kinase BceS		regulator modulating expression of antibiotic resistance genes	25118291
K-mer Search	Antibiotic Resistance	PATRIC	Bacillus coagulans 36D1	fig|345219.8.peg.2487	BcoaDRAFT_5864	VBIBacCoa3943_2487				Undecaprenyl-diphosphatase BcrC (EC 3.6.1.27), conveys bacitracin resistance		antibiotic target protection protein	12486040;15778224;15946938
FBA	Essential Gene	PATRIC	Bacillus coagulans 36D1	fig|345219.8.peg.1331	BcoaDRAFT_4807	VBIBacCoa3943_1331				Seryl-tRNA synthetase (EC 6.1.1.11)	Essential gene, predicted using metabolic flux-balance analysis in LB media
FBA	Essential Gene	PATRIC	Bacillus coagulans 36D1	fig|345219.8.peg.2647	BcoaDRAFT_6010	VBIBacCoa3943_2647				Isochorismate synthase (EC 5.4.4.2) @ Menaquinone-specific isochorismate synthase (EC 5.4.4.2)	Essential gene, predicted using metabolic flux-balance analysis in LB media
K-mer Search	Antibiotic Resistance	PATRIC	Bacillus coagulans 36D1	fig|345219.8.peg.1287	BcoaDRAFT_4763	VBIBacCoa3943_1287				Translation elongation factor Tu		antibiotic target in susceptible species	364475;9678602
BLAT	Transporter	TCDB	Bacillus coagulans 36D1	fig|345219.8.peg.2866	BcoaDRAFT_6204	VBIBacCoa3943_2866	Q65GF5	Bacillus licheniformis (strain DSM 13 / ATCC 14580)		Succinate dehydrogenase iron-sulfur protein (EC 1.3.5.1)	the prokaryotic succinate dehydrogenase (sdh) family.	3.D.10.1.1	15383718;15461803	99	99	81	1e-128
FBA	Essential Gene	PATRIC	Bacillus coagulans 36D1	fig|345219.8.peg.1404	BcoaDRAFT_4879	VBIBacCoa3943_1404				DNA polymerase III beta subunit (EC 2.7.7.7)	Essential gene, predicted using metabolic flux-balance analysis in LB media
BLAT	Virulence Factor	PATRIC_VF	Bacillus coagulans 36D1	fig|345219.8.peg.1437	BcoaDRAFT_4907	VBIBacCoa3943_1437	lmo0055	Listeria monocytogenes EGD-e		Adenylosuccinate synthetase (EC 6.3.4.4)		Intracellular survival and replication	20955543	99	99	83	1e-213
K-mer Search	Antibiotic Resistance	PATRIC	Bacillus coagulans 36D1	fig|345219.8.peg.1341	BcoaDRAFT_4820	VBIBacCoa3943_1341				Dihydropteroate synthase (EC 2.5.1.15)		antibiotic target in susceptible species	15673783
FBA	Essential Gene	PATRIC	Bacillus coagulans 36D1	fig|345219.8.peg.2270	BcoaDRAFT_5664	VBIBacCoa3943_2270				Ketol-acid reductoisomerase (NADP(+)) (EC 1.1.1.86)	Essential gene, predicted using metabolic flux-balance analysis in LB media
K-mer Search	Antibiotic Resistance	PATRIC	Bacillus coagulans 36D1	fig|345219.8.peg.1285	BcoaDRAFT_4761	VBIBacCoa3943_1285				SSU ribosomal protein S10p (S20e)		antibiotic target in susceptible species	26124155
FBA	Essential Gene	PATRIC	Bacillus coagulans 36D1	fig|345219.8.peg.1585	BcoaDRAFT_5038	VBIBacCoa3943_1585				LSU ribosomal protein L31p @ LSU ribosomal protein L31p, zinc-dependent	Essential gene, predicted using metabolic flux-balance analysis in LB media
FBA	Essential Gene	PATRIC	Bacillus coagulans 36D1	fig|345219.8.peg.3408	BcoaDRAFT_3391	VBIBacCoa3943_3408				Manganese transport protein MntH	Essential gene, predicted using metabolic flux-balance analysis in LB media
BLASTP	Human Homolog	Human	Bacillus coagulans 36D1	fig|345219.8.peg.3436	BcoaDRAFT_3415	VBIBacCoa3943_3436	NP_004484.1	Homo sapiens		hypothetical protein				95	96	61	2e-100
FBA	Essential Gene	PATRIC	Bacillus coagulans 36D1	fig|345219.8.peg.3183	BcoaDRAFT_3190	VBIBacCoa3943_3183				Branched-chain alpha-keto acid dehydrogenase, E1 component, beta subunit (EC 1.2.4.4)	Essential gene, predicted using metabolic flux-balance analysis in LB media
BLASTP	Human Homolog	Human	Bacillus coagulans 36D1	fig|345219.8.peg.1564	BcoaDRAFT_5021	VBIBacCoa3943_1564	NP_000008.1	Homo sapiens		Acyl-CoA dehydrogenase, short-chain specific (EC 1.3.8.1)				91	98	52	6e-133
BLAT	Transporter	TCDB	Bacillus coagulans 36D1	fig|345219.8.peg.3153	BcoaDRAFT_3163	VBIBacCoa3943_3153	P49780	Bacillus subtilis		Stage III sporulation protein AC	the multicomponent putative spoiiiae exporter (spoiiia-e) family.	9.B.70.1.1	1766372;19383706;8969508;9384377	98	100	83	8e-26
FBA	Essential Gene	PATRIC	Bacillus coagulans 36D1	fig|345219.8.peg.1259	BcoaDRAFT_4736	VBIBacCoa3943_1259				SSU ribosomal protein S13p (S18e)	Essential gene, predicted using metabolic flux-balance analysis in LB media
K-mer Search	Antibiotic Resistance	PATRIC	Bacillus coagulans 36D1	fig|345219.8.peg.1584	BcoaDRAFT_5037	VBIBacCoa3943_1584				Transcription termination factor Rho		antibiotic target in susceptible species	8466900
FBA	Essential Gene	PATRIC	Bacillus coagulans 36D1	fig|345219.8.peg.1384	BcoaDRAFT_4858	VBIBacCoa3943_1384				Methionyl-tRNA synthetase (EC 6.1.1.10)	Essential gene, predicted using metabolic flux-balance analysis in LB media
FBA	Essential Gene	PATRIC	Bacillus coagulans 36D1	fig|345219.8.peg.2649	BcoaDRAFT_6012	VBIBacCoa3943_2649				2-succinyl-6-hydroxy-2,4-cyclohexadiene-1-carboxylate synthase (EC 4.2.99.20)	Essential gene, predicted using metabolic flux-balance analysis in LB media
FBA	Essential Gene	PATRIC	Bacillus coagulans 36D1	fig|345219.8.peg.1263	BcoaDRAFT_4739	VBIBacCoa3943_1263				Adenylate kinase (EC 2.7.4.3)	Essential gene, predicted using metabolic flux-balance analysis in LB media
FBA	Essential Gene	PATRIC	Bacillus coagulans 36D1	fig|345219.8.peg.3274	BcoaDRAFT_3270	VBIBacCoa3943_3274				Heptaprenyl diphosphate synthase component I (EC 2.5.1.30)	Essential gene, predicted using metabolic flux-balance analysis in LB media
FBA	Essential Gene	PATRIC	Bacillus coagulans 36D1	fig|345219.8.peg.1265	BcoaDRAFT_4741	VBIBacCoa3943_1265				LSU ribosomal protein L15p (L27Ae)	Essential gene, predicted using metabolic flux-balance analysis in LB media
FBA	Essential Gene	PATRIC	Bacillus coagulans 36D1	fig|345219.8.peg.406	BcoaDRAFT_3997	VBIBacCoa3943_0406				Uroporphyrinogen III decarboxylase (EC 4.1.1.37)	Essential gene, predicted using metabolic flux-balance analysis in LB media
BLASTP	Human Homolog	Human	Bacillus coagulans 36D1	fig|345219.8.peg.1739	BcoaDRAFT_5179	VBIBacCoa3943_1739	NP_006102.2	Homo sapiens		Acetyl-CoA acetyltransferase (EC 2.3.1.9)				97	98	51	5e-141
FBA	Essential Gene	PATRIC	Bacillus coagulans 36D1	fig|345219.8.peg.3123	BcoaDRAFT_3136	VBIBacCoa3943_3123				Shikimate kinase I (EC 2.7.1.71)	Essential gene, predicted using metabolic flux-balance analysis in LB media
FBA	Essential Gene	PATRIC	Bacillus coagulans 36D1	fig|345219.8.peg.1079	BcoaDRAFT_4575	VBIBacCoa3943_1079				Phosphomevalonate kinase (EC 2.7.4.2)	Essential gene, predicted using metabolic flux-balance analysis in LB media
FBA	Essential Gene	PATRIC	Bacillus coagulans 36D1	fig|345219.8.peg.1272	BcoaDRAFT_4748	VBIBacCoa3943_1272				LSU ribosomal protein L5p (L11e)	Essential gene, predicted using metabolic flux-balance analysis in LB media
FBA	Essential Gene	PATRIC	Bacillus coagulans 36D1	fig|345219.8.peg.1760	BcoaDRAFT_5197	VBIBacCoa3943_1760				Xanthine/uracil/thiamine/ascorbate permease family protein	Essential gene, predicted using metabolic flux-balance analysis in LB media
FBA	Essential Gene	PATRIC	Bacillus coagulans 36D1	fig|345219.8.peg.2793	BcoaDRAFT_6139	VBIBacCoa3943_2793				Dephospho-CoA kinase (EC 2.7.1.24)	Essential gene, predicted using metabolic flux-balance analysis in LB media
FBA	Essential Gene	PATRIC	Bacillus coagulans 36D1	fig|345219.8.peg.15	BcoaDRAFT_3670	VBIBacCoa3943_0015				SSU ribosomal protein S16p	Essential gene, predicted using metabolic flux-balance analysis in LB media
FBA	Essential Gene	PATRIC	Bacillus coagulans 36D1	fig|345219.8.peg.1495	BcoaDRAFT_4961	VBIBacCoa3943_1495				Methionine ABC transporter substrate-binding protein	Essential gene, predicted using metabolic flux-balance analysis in LB media
BLASTP	Human Homolog	Human	Bacillus coagulans 36D1	fig|345219.8.peg.2489	BcoaDRAFT_5865	VBIBacCoa3943_2489	NP_001743.1	Homo sapiens		Catalase KatE (EC 1.11.1.6)				89	95	51	3e-166
FBA	Essential Gene	PATRIC	Bacillus coagulans 36D1	fig|345219.8.peg.3175	BcoaDRAFT_3183	VBIBacCoa3943_3175				Glycerophosphoryl diester phosphodiesterase (EC 3.1.4.46)	Essential gene, predicted using metabolic flux-balance analysis in LB media
K-mer Search	Antibiotic Resistance	PATRIC	Bacillus coagulans 36D1	fig|345219.8.peg.3547	BcoaDRAFT_3519	VBIBacCoa3943_3547				Two-component response regulator BceR		regulator modulating expression of antibiotic resistance genes	25118291
FBA	Essential Gene	PATRIC	Bacillus coagulans 36D1	fig|345219.8.peg.1391	BcoaDRAFT_4865	VBIBacCoa3943_1391				DNA polymerase III delta prime subunit (EC 2.7.7.7)	Essential gene, predicted using metabolic flux-balance analysis in LB media
BLASTP	Human Homolog	Human	Bacillus coagulans 36D1	fig|345219.8.peg.3102	BcoaDRAFT_3116	VBIBacCoa3943_3102	NP_001019636.1	Homo sapiens		Superoxide dismutase [Mn] (EC 1.15.1.1)				88	99	52	3e-69
BLAT	Transporter	TCDB	Bacillus coagulans 36D1	fig|345219.8.peg.691	BcoaDRAFT_4236	VBIBacCoa3943_0691	E1UCI2	Listeria monocytogenes serotype 4a (strain L99)		PTS system, mannose-specific IID component	the pts mannose-fructose-sorbose (man) family.	4.A.6.1.15		97	97	81	1e-146
FBA	Essential Gene	PATRIC	Bacillus coagulans 36D1	fig|345219.8.peg.3051	BcoaDRAFT_3070	VBIBacCoa3943_3051				SSU ribosomal protein S20p	Essential gene, predicted using metabolic flux-balance analysis in LB media
FBA	Essential Gene	PATRIC	Bacillus coagulans 36D1	fig|345219.8.peg.3281	BcoaDRAFT_3277	VBIBacCoa3943_3281				Chorismate mutase II (EC 5.4.99.5)	Essential gene, predicted using metabolic flux-balance analysis in LB media
FBA	Essential Gene	PATRIC	Bacillus coagulans 36D1	fig|345219.8.peg.3168	BcoaDRAFT_3176	VBIBacCoa3943_3168				(2E,6E)-farnesyl diphosphate synthase (EC 2.5.1.10)	Essential gene, predicted using metabolic flux-balance analysis in LB media
FBA	Essential Gene	PATRIC	Bacillus coagulans 36D1	fig|345219.8.peg.1306	BcoaDRAFT_4782	VBIBacCoa3943_1306				Cysteinyl-tRNA synthetase (EC 6.1.1.16)	Essential gene, predicted using metabolic flux-balance analysis in LB media
FBA	Essential Gene	PATRIC	Bacillus coagulans 36D1	fig|345219.8.peg.1309	BcoaDRAFT_4784	VBIBacCoa3943_1309				Glutamyl-tRNA synthetase (EC 6.1.1.17) @ Glutamyl-tRNA(Gln) synthetase (EC 6.1.1.24)	Essential gene, predicted using metabolic flux-balance analysis in LB media
FBA	Essential Gene	PATRIC	Bacillus coagulans 36D1	fig|345219.8.peg.3643	BcoaDRAFT_3601	VBIBacCoa3943_3643				Thymidylate synthase (EC 2.1.1.45)	Essential gene, predicted using metabolic flux-balance analysis in LB media
FBA	Essential Gene	PATRIC	Bacillus coagulans 36D1	fig|345219.8.peg.2485	BcoaDRAFT_5862	VBIBacCoa3943_2485				hypothetical protein	Essential gene, predicted using metabolic flux-balance analysis in LB media
FBA	Essential Gene	PATRIC	Bacillus coagulans 36D1	fig|345219.8.peg.2651	BcoaDRAFT_6014	VBIBacCoa3943_2651				O-succinylbenzoic acid--CoA ligase (EC 6.2.1.26)	Essential gene, predicted using metabolic flux-balance analysis in LB media
BLASTP	Human Homolog	Human	Bacillus coagulans 36D1	fig|345219.8.peg.2891	BcoaDRAFT_6225	VBIBacCoa3943_2891	NP_006651.2	Homo sapiens		ATP-dependent Clp protease ATP-binding subunit ClpX				51	72	52	2e-102
FBA	Essential Gene	PATRIC	Bacillus coagulans 36D1	fig|345219.8.peg.733	BcoaDRAFT_4270	VBIBacCoa3943_0733				hypothetical protein	Essential gene, predicted using metabolic flux-balance analysis in LB media
FBA	Essential Gene	PATRIC	Bacillus coagulans 36D1	fig|345219.8.peg.1105	BcoaDRAFT_4590	VBIBacCoa3943_1105				hypothetical protein	Essential gene, predicted using metabolic flux-balance analysis in LB media
K-mer Search	Antibiotic Resistance	PATRIC	Bacillus coagulans 36D1	fig|345219.8.peg.1612	BcoaDRAFT_5064	VBIBacCoa3943_1612				UDP-N-acetylglucosamine 1-carboxyvinyltransferase (EC 2.5.1.7)		antibiotic target in susceptible species	8994972
FBA	Essential Gene	PATRIC	Bacillus coagulans 36D1	fig|345219.8.peg.584	BcoaDRAFT_4137	VBIBacCoa3943_0584				UDP-glucose 4-epimerase (EC 5.1.3.2)	Essential gene, predicted using metabolic flux-balance analysis in LB media
BLAT	Drug Target	DrugBank	Bacillus coagulans 36D1	fig|345219.8.peg.1663	BcoaDRAFT_5105	VBIBacCoa3943_1663	P96622	Bacillus subtilis (strain 168)		Programmed cell death toxin YdcE	2-(2-{2-[2-(2-Methoxy-Ethoxy)-Ethoxy]-Ethoxy}-Ethoxy)-Ethanol	Drug target		83	96	89	3e-43
FBA	Essential Gene	PATRIC	Bacillus coagulans 36D1	fig|345219.8.peg.3310	BcoaDRAFT_3304	VBIBacCoa3943_3310				Asparaginyl-tRNA synthetase (EC 6.1.1.22)	Essential gene, predicted using metabolic flux-balance analysis in LB media
K-mer Search	Antibiotic Resistance	PATRIC	Bacillus coagulans 36D1	fig|345219.8.peg.1399	BcoaDRAFT_4875	VBIBacCoa3943_1399				DNA gyrase subunit B (EC 5.99.1.3)		antibiotic target in susceptible species	21693461;22279180;9293187
FBA	Essential Gene	PATRIC	Bacillus coagulans 36D1	fig|345219.8.peg.1861	BcoaDRAFT_5290	VBIBacCoa3943_1861				Purine nucleoside phosphorylase (EC 2.4.2.1)	Essential gene, predicted using metabolic flux-balance analysis in LB media
FBA	Essential Gene	PATRIC	Bacillus coagulans 36D1	fig|345219.8.peg.9	BcoaDRAFT_3665	VBIBacCoa3943_0009				LSU ribosomal protein L19p	Essential gene, predicted using metabolic flux-balance analysis in LB media
BLASTP	Human Homolog	Human	Bacillus coagulans 36D1	fig|345219.8.peg.452	BcoaDRAFT_4033	VBIBacCoa3943_0452	NP_006003.1	Homo sapiens		ATP-dependent Clp protease proteolytic subunit ClpP (EC 3.4.21.92)				68	96	56	7e-74
FBA	Essential Gene	PATRIC	Bacillus coagulans 36D1	fig|345219.8.peg.127	BcoaDRAFT_3769	VBIBacCoa3943_0127				LSU ribosomal protein L32p @ LSU ribosomal protein L32p, zinc-dependent	Essential gene, predicted using metabolic flux-balance analysis in LB media
FBA	Essential Gene	PATRIC	Bacillus coagulans 36D1	fig|345219.8.peg.3148	BcoaDRAFT_3158	VBIBacCoa3943_3148				3-dehydroquinate dehydratase II (EC 4.2.1.10)	Essential gene, predicted using metabolic flux-balance analysis in LB media
BLASTP	Human Homolog	Human	Bacillus coagulans 36D1	fig|345219.8.peg.3277	BcoaDRAFT_3273	VBIBacCoa3943_3277	NP_002504.2	Homo sapiens		Nucleoside diphosphate kinase (EC 2.7.4.6)				86	99	59	2e-62
FBA	Essential Gene	PATRIC	Bacillus coagulans 36D1	fig|345219.8.peg.3402	BcoaDRAFT_3385	VBIBacCoa3943_3402				UDP-N-acetylenolpyruvoylglucosamine reductase (EC 1.3.1.98)	Essential gene, predicted using metabolic flux-balance analysis in LB media
FBA	Essential Gene	PATRIC	Bacillus coagulans 36D1	fig|345219.8.peg.2648	BcoaDRAFT_6011	VBIBacCoa3943_2648				2-succinyl-5-enolpyruvyl-6-hydroxy-3-cyclohexene-1-carboxylic-acid synthase (EC 2.2.1.9)	Essential gene, predicted using metabolic flux-balance analysis in LB media
FBA	Essential Gene	PATRIC	Bacillus coagulans 36D1	fig|345219.8.peg.1399	BcoaDRAFT_4875	VBIBacCoa3943_1399				DNA gyrase subunit B (EC 5.99.1.3)	Essential gene, predicted using metabolic flux-balance analysis in LB media
FBA	Essential Gene	PATRIC	Bacillus coagulans 36D1	fig|345219.8.peg.23	BcoaDRAFT_3678	VBIBacCoa3943_0023				Malonyl CoA-acyl carrier protein transacylase (EC 2.3.1.39)	Essential gene, predicted using metabolic flux-balance analysis in LB media
FBA	Essential Gene	PATRIC	Bacillus coagulans 36D1	fig|345219.8.peg.3012	BcoaDRAFT_6335	VBIBacCoa3943_3012				hypothetical protein	Essential gene, predicted using metabolic flux-balance analysis in LB media
K-mer Search	Antibiotic Resistance	PATRIC	Bacillus coagulans 36D1	fig|345219.8.peg.89	BcoaDRAFT_3738	VBIBacCoa3943_0089				Isoleucyl-tRNA synthetase (EC 6.1.1.5)		antibiotic target in susceptible species	7929087
FBA	Essential Gene	PATRIC	Bacillus coagulans 36D1	fig|345219.8.peg.2818	BcoaDRAFT_6162	VBIBacCoa3943_2818				LSU ribosomal protein L20p	Essential gene, predicted using metabolic flux-balance analysis in LB media
K-mer Search	Antibiotic Resistance	PATRIC	Bacillus coagulans 36D1	fig|345219.8.peg.314	BcoaDRAFT_3920	VBIBacCoa3943_0314				Enoyl-[acyl-carrier-protein] reductase [NADH] (EC 1.3.1.9)		antibiotic target in susceptible species	18193820;10869170;8284673
FBA	Essential Gene	PATRIC	Bacillus coagulans 36D1	fig|345219.8.peg.1106	BcoaDRAFT_4591	VBIBacCoa3943_1106				Uroporphyrinogen-III methyltransferase (EC 2.1.1.107)	Essential gene, predicted using metabolic flux-balance analysis in LB media
FBA	Essential Gene	PATRIC	Bacillus coagulans 36D1	fig|345219.8.peg.3228	BcoaDRAFT_3229	VBIBacCoa3943_3228				Segregation and condensation protein B	Essential gene, predicted using metabolic flux-balance analysis in LB media
FBA	Essential Gene	PATRIC	Bacillus coagulans 36D1	fig|345219.8.peg.3039	BcoaDRAFT_6359	VBIBacCoa3943_3039				Shikimate 5-dehydrogenase I alpha (EC 1.1.1.25)	Essential gene, predicted using metabolic flux-balance analysis in LB media
K-mer Search	Antibiotic Resistance	PATRIC	Bacillus coagulans 36D1	fig|345219.8.peg.1582	BcoaDRAFT_5035	VBIBacCoa3943_1582				UDP-N-acetylglucosamine 1-carboxyvinyltransferase (EC 2.5.1.7)		antibiotic target in susceptible species	8994972
FBA	Essential Gene	PATRIC	Bacillus coagulans 36D1	fig|345219.8.peg.1297	BcoaDRAFT_4774	VBIBacCoa3943_1297				LSU ribosomal protein L1p (L10Ae)	Essential gene, predicted using metabolic flux-balance analysis in LB media
FBA	Essential Gene	PATRIC	Bacillus coagulans 36D1	fig|345219.8.peg.1289	BcoaDRAFT_4765	VBIBacCoa3943_1289				SSU ribosomal protein S7p (S5e)	Essential gene, predicted using metabolic flux-balance analysis in LB media
K-mer Search	Antibiotic Resistance	PATRIC	Bacillus coagulans 36D1	fig|345219.8.peg.352	BcoaDRAFT_3952	VBIBacCoa3943_0352				3-oxoacyl-[acyl-carrier-protein] synthase, KASII (EC 2.3.1.179)		antibiotic target in susceptible species	10428945
FBA	Essential Gene	PATRIC	Bacillus coagulans 36D1	fig|345219.8.peg.2266	BcoaDRAFT_5661	VBIBacCoa3943_2266				Dihydroxy-acid dehydratase (EC 4.2.1.9)	Essential gene, predicted using metabolic flux-balance analysis in LB media
BLAT	Drug Target	DrugBank	Bacillus coagulans 36D1	fig|345219.8.peg.3510	BcoaDRAFT_3482	VBIBacCoa3943_3510	Q59192	Bacillus subtilis (strain 168)		DNA topoisomerase IV subunit B (EC 5.99.1.3)	Ciprofloxacin	Drug target		76	82	83	1e-245
FBA	Essential Gene	PATRIC	Bacillus coagulans 36D1	fig|345219.8.peg.3279	BcoaDRAFT_3275	VBIBacCoa3943_3279				Chorismate synthase (EC 4.2.3.5)	Essential gene, predicted using metabolic flux-balance analysis in LB media
FBA	Essential Gene	PATRIC	Bacillus coagulans 36D1	fig|345219.8.peg.1344	BcoaDRAFT_4823	VBIBacCoa3943_1344				Pantothenate kinase type III, CoaX-like (EC 2.7.1.33)	Essential gene, predicted using metabolic flux-balance analysis in LB media
FBA	Essential Gene	PATRIC	Bacillus coagulans 36D1	fig|345219.8.peg.20	BcoaDRAFT_3675	VBIBacCoa3943_0020				Ribonuclease III (EC 3.1.26.3)	Essential gene, predicted using metabolic flux-balance analysis in LB media
K-mer Search	Antibiotic Resistance	PATRIC	Bacillus coagulans 36D1	fig|345219.8.peg.1269	BcoaDRAFT_4745	VBIBacCoa3943_1269				LSU ribosomal protein L6p (L9e)		antibiotic target in susceptible species	19289529;17923494
FBA	Essential Gene	PATRIC	Bacillus coagulans 36D1	fig|345219.8.peg.3510	BcoaDRAFT_3482	VBIBacCoa3943_3510				DNA topoisomerase IV subunit B (EC 5.99.1.3)	Essential gene, predicted using metabolic flux-balance analysis in LB media
K-mer Search	Antibiotic Resistance	PATRIC	Bacillus coagulans 36D1	fig|345219.8.peg.1293	BcoaDRAFT_4769	VBIBacCoa3943_1293				DNA-directed RNA polymerase beta subunit (EC 2.7.7.6)		antibiotic target in susceptible species	3050121;15047531;16723576
BLAT	Drug Target	DrugBank	Bacillus coagulans 36D1	fig|345219.8.peg.3709	BcoaDRAFT_3003	VBIBacCoa3943_3709	Q06AK7	Staphylococcus aureus		DNA topoisomerase I (EC 5.99.1.2)	Pefloxacin;Novobiocin	Drug target		10	90	81	2e-28
FBA	Essential Gene	PATRIC	Bacillus coagulans 36D1	fig|345219.8.peg.3374	BcoaDRAFT_3359	VBIBacCoa3943_3374				Argininosuccinate lyase (EC 4.3.2.1)	Essential gene, predicted using metabolic flux-balance analysis in LB media
FBA	Essential Gene	PATRIC	Bacillus coagulans 36D1	fig|345219.8.peg.1428	BcoaDRAFT_4900	VBIBacCoa3943_1428				SSU ribosomal protein S6p	Essential gene, predicted using metabolic flux-balance analysis in LB media
FBA	Essential Gene	PATRIC	Bacillus coagulans 36D1	fig|345219.8.peg.1292	BcoaDRAFT_4768	VBIBacCoa3943_1292				DNA-directed RNA polymerase beta' subunit (EC 2.7.7.6)	Essential gene, predicted using metabolic flux-balance analysis in LB media
BLAT	Virulence Factor	PATRIC_VF	Bacillus coagulans 36D1	fig|345219.8.peg.1771	BcoaDRAFT_5209	VBIBacCoa3943_1771	LMOh7858_1898	Listeria monocytogenes serotype 4b str. H7858		Adenylosuccinate lyase (EC 4.3.2.2) @ SAICAR lyase (EC 4.3.2.2)		Virulence	22506772	91	90	83	1e-195
FBA	Essential Gene	PATRIC	Bacillus coagulans 36D1	fig|345219.8.peg.821	BcoaDRAFT_4341	VBIBacCoa3943_0821				L-aspartate oxidase (EC 1.4.3.16)	Essential gene, predicted using metabolic flux-balance analysis in LB media
BLASTP	Human Homolog	Human	Bacillus coagulans 36D1	fig|345219.8.peg.1369	BcoaDRAFT_4845	VBIBacCoa3943_1369	XP_005263413.1	Homo sapiens		hypothetical protein				5	65	50	9e-06
BLAT	Transporter	TCDB	Bacillus coagulans 36D1	fig|345219.8.peg.2865	BcoaDRAFT_6203	VBIBacCoa3943_2865	Q65GF4	Bacillus licheniformis (strain DSM 13 / ATCC 14580)		Succinate dehydrogenase flavoprotein subunit (EC 1.3.5.1)	the prokaryotic succinate dehydrogenase (sdh) family.	3.D.10.1.1	15383718;15461803	93	94	85	1e-288
FBA	Essential Gene	PATRIC	Bacillus coagulans 36D1	fig|345219.8.peg.1107	BcoaDRAFT_4592	VBIBacCoa3943_1107				Phosphoadenylyl-sulfate reductase [thioredoxin] (EC 1.8.4.8)	Essential gene, predicted using metabolic flux-balance analysis in LB media
FBA	Essential Gene	PATRIC	Bacillus coagulans 36D1	fig|345219.8.peg.2937	BcoaDRAFT_6269	VBIBacCoa3943_2937				LSU ribosomal protein L27p	Essential gene, predicted using metabolic flux-balance analysis in LB media
BLASTP	Human Homolog	Human	Bacillus coagulans 36D1	fig|345219.8.peg.2451	BcoaDRAFT_5830	VBIBacCoa3943_2451	NP_001966.1	Homo sapiens		Enolase (EC 4.2.1.11)				97	97	52	1e-148
K-mer Search	Antibiotic Resistance	PATRIC	Bacillus coagulans 36D1	fig|345219.8.peg.3642	BcoaDRAFT_3600	VBIBacCoa3943_3642				Dihydrofolate reductase (EC 1.5.1.3)		antibiotic target in susceptible species	20169085;25288078
FBA	Essential Gene	PATRIC	Bacillus coagulans 36D1	fig|345219.8.peg.40	BcoaDRAFT_3693	VBIBacCoa3943_0040				Methionyl-tRNA formyltransferase (EC 2.1.2.9)	Essential gene, predicted using metabolic flux-balance analysis in LB media
K-mer Search	Antibiotic Resistance	PATRIC	Bacillus coagulans 36D1	fig|345219.8.peg.3759	BcoaDRAFT_3048	VBIBacCoa3943_3759				1-deoxy-D-xylulose 5-phosphate reductoisomerase (EC 1.1.1.267)		antibiotic target in susceptible species	16321944
BLAT	Drug Target	DrugBank	Bacillus coagulans 36D1	fig|345219.8.peg.2787	BcoaDRAFT_6134	VBIBacCoa3943_2787	P39126	Bacillus subtilis (strain 168)		Isocitrate dehydrogenase [NADP] (EC 1.1.1.42)	(R)-Propylene glycol;Citric Acid;S-1,2-Propanediol;S,S-(2-Hydroxyethyl)Thiocysteine'	Drug target		99	99	89	1e-222
BLASTP	Human Homolog	Human	Bacillus coagulans 36D1	fig|345219.8.peg.1606	BcoaDRAFT_5058	VBIBacCoa3943_1606	NP_001001937.1	Homo sapiens		ATP synthase alpha chain (EC 3.6.3.14)				91	98	58	0
FBA	Essential Gene	PATRIC	Bacillus coagulans 36D1	fig|345219.8.peg.724	BcoaDRAFT_4263	VBIBacCoa3943_0724				Teichoic acid export ATP-binding protein TagH (EC 3.6.3.40)	Essential gene, predicted using metabolic flux-balance analysis in LB media
FBA	Essential Gene	PATRIC	Bacillus coagulans 36D1	fig|345219.8.peg.1257	BcoaDRAFT_4734	VBIBacCoa3943_1257				DNA-directed RNA polymerase alpha subunit (EC 2.7.7.6)	Essential gene, predicted using metabolic flux-balance analysis in LB media
FBA	Essential Gene	PATRIC	Bacillus coagulans 36D1	fig|345219.8.peg.1557	BcoaDRAFT_5016	VBIBacCoa3943_1557				Arginyl-tRNA synthetase (EC 6.1.1.19)	Essential gene, predicted using metabolic flux-balance analysis in LB media
FBA	Essential Gene	PATRIC	Bacillus coagulans 36D1	fig|345219.8.peg.1258	BcoaDRAFT_4735	VBIBacCoa3943_1258				SSU ribosomal protein S11p (S14e)	Essential gene, predicted using metabolic flux-balance analysis in LB media
FBA	Essential Gene	PATRIC	Bacillus coagulans 36D1	fig|345219.8.peg.3240	BcoaDRAFT_3240	VBIBacCoa3943_3240				hypothetical protein	Essential gene, predicted using metabolic flux-balance analysis in LB media
FBA	Essential Gene	PATRIC	Bacillus coagulans 36D1	fig|345219.8.peg.823	BcoaDRAFT_4343	VBIBacCoa3943_0823				Quinolinate synthetase (EC 2.5.1.72)	Essential gene, predicted using metabolic flux-balance analysis in LB media
FBA	Essential Gene	PATRIC	Bacillus coagulans 36D1	fig|345219.8.peg.1296	BcoaDRAFT_4772	VBIBacCoa3943_1296				LSU ribosomal protein L10p (P0)	Essential gene, predicted using metabolic flux-balance analysis in LB media
FBA	Essential Gene	PATRIC	Bacillus coagulans 36D1	fig|345219.8.peg.1250	BcoaDRAFT_4727	VBIBacCoa3943_1250				SSU ribosomal protein S9p (S16e)	Essential gene, predicted using metabolic flux-balance analysis in LB media
FBA	Essential Gene	PATRIC	Bacillus coagulans 36D1	fig|345219.8.peg.2668	BcoaDRAFT_6031	VBIBacCoa3943_2668				S-adenosylmethionine synthetase (EC 2.5.1.6)	Essential gene, predicted using metabolic flux-balance analysis in LB media
FBA	Essential Gene	PATRIC	Bacillus coagulans 36D1	fig|345219.8.peg.1434	BcoaDRAFT_4905	VBIBacCoa3943_1434				LSU ribosomal protein L9p	Essential gene, predicted using metabolic flux-balance analysis in LB media
BLASTP	Human Homolog	Human	Bacillus coagulans 36D1	fig|345219.8.peg.3520	BcoaDRAFT_3491	VBIBacCoa3943_3520	XP_005251533.1	Homo sapiens		Aconitate hydratase (EC 4.2.1.3)				97	95	54	0
FBA	Essential Gene	PATRIC	Bacillus coagulans 36D1	fig|345219.8.peg.478	BcoaDRAFT_4051	VBIBacCoa3943_0478				CDP-glycerol:glycerophosphate glycerophosphotransferase	Essential gene, predicted using metabolic flux-balance analysis in LB media
FBA	Essential Gene	PATRIC	Bacillus coagulans 36D1	fig|345219.8.peg.1277	BcoaDRAFT_4753	VBIBacCoa3943_1277				LSU ribosomal protein L16p (L10e)	Essential gene, predicted using metabolic flux-balance analysis in LB media
BLAT	Drug Target	DrugBank	Bacillus coagulans 36D1	fig|345219.8.peg.1598	BcoaDRAFT_5050	VBIBacCoa3943_1598	Q5KUI2	Geobacillus kaustophilus (strain HTA426)		Serine hydroxymethyltransferase (EC 2.1.2.1)	(6R)-Folinic acid	Drug target		98	97	82	1e-195
BLAT	Transporter	TCDB	Bacillus coagulans 36D1	fig|345219.8.peg.2421	BcoaDRAFT_5803	VBIBacCoa3943_2421	P26904	Bacillus subtilis		Dipeptide ABC transporter, permease protein DppC (TC 3.A.1.5.2)	the atp-binding cassette (abc) superfamily.	3.A.1.5.2	11069674;11473256;1766370;19383706;3145906;9384377	89	89	80	1e-135
FBA	Essential Gene	PATRIC	Bacillus coagulans 36D1	fig|345219.8.peg.2813	BcoaDRAFT_6158	VBIBacCoa3943_2813				Threonyl-tRNA synthetase (EC 6.1.1.3)	Essential gene, predicted using metabolic flux-balance analysis in LB media
FBA	Essential Gene	PATRIC	Bacillus coagulans 36D1	fig|345219.8.peg.2679	BcoaDRAFT_6039	VBIBacCoa3943_2679				Leucyl-tRNA synthetase (EC 6.1.1.4)	Essential gene, predicted using metabolic flux-balance analysis in LB media
FBA	Essential Gene	PATRIC	Bacillus coagulans 36D1	fig|345219.8.peg.1795	BcoaDRAFT_5230	VBIBacCoa3943_1795				hypothetical protein	Essential gene, predicted using metabolic flux-balance analysis in LB media
FBA	Essential Gene	PATRIC	Bacillus coagulans 36D1	fig|345219.8.peg.1494	BcoaDRAFT_4960	VBIBacCoa3943_1494				Methionine ABC transporter permease protein	Essential gene, predicted using metabolic flux-balance analysis in LB media
FBA	Essential Gene	PATRIC	Bacillus coagulans 36D1	fig|345219.8.peg.2969	BcoaDRAFT_6299	VBIBacCoa3943_2969				Histidyl-tRNA synthetase (EC 6.1.1.21)	Essential gene, predicted using metabolic flux-balance analysis in LB media
FBA	Essential Gene	PATRIC	Bacillus coagulans 36D1	fig|345219.8.peg.973	BcoaDRAFT_4481	VBIBacCoa3943_0973				5-methyltetrahydrofolate--homocysteine methyltransferase (EC 2.1.1.13)	Essential gene, predicted using metabolic flux-balance analysis in LB media
FBA	Essential Gene	PATRIC	Bacillus coagulans 36D1	fig|345219.8.peg.3276	BcoaDRAFT_3272	VBIBacCoa3943_3276				Heptaprenyl diphosphate synthase component II (EC 2.5.1.30)	Essential gene, predicted using metabolic flux-balance analysis in LB media
FBA	Essential Gene	PATRIC	Bacillus coagulans 36D1	fig|345219.8.peg.1281	BcoaDRAFT_4757	VBIBacCoa3943_1281				LSU ribosomal protein L2p (L8e)	Essential gene, predicted using metabolic flux-balance analysis in LB media
FBA	Essential Gene	PATRIC	Bacillus coagulans 36D1	fig|345219.8.peg.3065	BcoaDRAFT_3084	VBIBacCoa3943_3065				SSU ribosomal protein S21p	Essential gene, predicted using metabolic flux-balance analysis in LB media
BLASTP	Human Homolog	Human	Bacillus coagulans 36D1	fig|345219.8.peg.3602	BcoaDRAFT_3565	VBIBacCoa3943_3602	NP_000681.2	Homo sapiens		Aldehyde dehydrogenase (EC 1.2.1.3)				92	95	55	0
FBA	Essential Gene	PATRIC	Bacillus coagulans 36D1	fig|345219.8.peg.1284	BcoaDRAFT_4760	VBIBacCoa3943_1284				LSU ribosomal protein L3p (L3e)	Essential gene, predicted using metabolic flux-balance analysis in LB media
FBA	Essential Gene	PATRIC	Bacillus coagulans 36D1	fig|345219.8.peg.475	BcoaDRAFT_4049	VBIBacCoa3943_0475				Teichoic acid translocation permease protein TagG	Essential gene, predicted using metabolic flux-balance analysis in LB media
FBA	Essential Gene	PATRIC	Bacillus coagulans 36D1	fig|345219.8.peg.43	BcoaDRAFT_3696	VBIBacCoa3943_0043				Phosphopantothenoylcysteine decarboxylase (EC 4.1.1.36) / Phosphopantothenoylcysteine synthetase (EC 6.3.2.5)	Essential gene, predicted using metabolic flux-balance analysis in LB media
FBA	Essential Gene	PATRIC	Bacillus coagulans 36D1	fig|345219.8.peg.2389	BcoaDRAFT_5777	VBIBacCoa3943_2389				ABC transporter, ATP-binding protein (cluster 3, basic aa/glutamine/opines)	Essential gene, predicted using metabolic flux-balance analysis in LB media
FBA	Essential Gene	PATRIC	Bacillus coagulans 36D1	fig|345219.8.peg.343	BcoaDRAFT_3944	VBIBacCoa3943_0343				Tryptophanyl-tRNA synthetase (EC 6.1.1.2)	Essential gene, predicted using metabolic flux-balance analysis in LB media
K-mer Search	Antibiotic Resistance	PATRIC	Bacillus coagulans 36D1	fig|345219.8.peg.2324	BcoaDRAFT_5719	VBIBacCoa3943_2324				Enoyl-[acyl-carrier-protein] reductase [NADPH] (EC 1.3.1.104), FabL		antibiotic target replacement protein	21185310
FBA	Essential Gene	PATRIC	Bacillus coagulans 36D1	fig|345219.8.peg.3227	BcoaDRAFT_3228	VBIBacCoa3943_3227				Segregation and condensation protein A	Essential gene, predicted using metabolic flux-balance analysis in LB media
FBA	Essential Gene	PATRIC	Bacillus coagulans 36D1	fig|345219.8.peg.2995	BcoaDRAFT_6319	VBIBacCoa3943_2995				Alanyl-tRNA synthetase (EC 6.1.1.7)	Essential gene, predicted using metabolic flux-balance analysis in LB media
FBA	Essential Gene	PATRIC	Bacillus coagulans 36D1	fig|345219.8.peg.1267	BcoaDRAFT_4743	VBIBacCoa3943_1267				SSU ribosomal protein S5p (S2e)	Essential gene, predicted using metabolic flux-balance analysis in LB media
BLAT	Transporter	TCDB	Bacillus coagulans 36D1	fig|345219.8.peg.3058	BcoaDRAFT_3077	VBIBacCoa3943_3058	G4NXA5	Bacillus subtilis subsp. spizizenii TU-B-10		Chaperone protein DnaK	the cation channel-forming heat shock protein-70 (hsp70) family.	1.A.33.1.4		95	95	85	1e-288
FBA	Essential Gene	PATRIC	Bacillus coagulans 36D1	fig|345219.8.peg.1268	BcoaDRAFT_4744	VBIBacCoa3943_1268				LSU ribosomal protein L18p (L5e)	Essential gene, predicted using metabolic flux-balance analysis in LB media
FBA	Essential Gene	PATRIC	Bacillus coagulans 36D1	fig|345219.8.peg.1295	BcoaDRAFT_4771	VBIBacCoa3943_1295				LSU ribosomal protein L7p/L12p (P1/P2)	Essential gene, predicted using metabolic flux-balance analysis in LB media
FBA	Essential Gene	PATRIC	Bacillus coagulans 36D1	fig|345219.8.peg.1278	BcoaDRAFT_4754	VBIBacCoa3943_1278				SSU ribosomal protein S3p (S3e)	Essential gene, predicted using metabolic flux-balance analysis in LB media
FBA	Essential Gene	PATRIC	Bacillus coagulans 36D1	fig|345219.8.peg.3773	BcoaDRAFT_3061	VBIBacCoa3943_3773				SSU ribosomal protein S15p (S13e)	Essential gene, predicted using metabolic flux-balance analysis in LB media
FBA	Essential Gene	PATRIC	Bacillus coagulans 36D1	fig|345219.8.peg.1293	BcoaDRAFT_4769	VBIBacCoa3943_1293				DNA-directed RNA polymerase beta subunit (EC 2.7.7.6)	Essential gene, predicted using metabolic flux-balance analysis in LB media
BLAT	Transporter	TCDB	Bacillus coagulans 36D1	fig|345219.8.peg.2926	BcoaDRAFT_6258	VBIBacCoa3943_2926	Q01465	Bacillus subtilis (strain 168)		Rod shape-determining protein MreB	the cell shape-determining mrebcd (mrebcd) family.	9.B.157.1.1		64	97	83	2e-96
BLAT	Drug Target	DrugBank	Bacillus coagulans 36D1	fig|345219.8.peg.2453	BcoaDRAFT_5833	VBIBacCoa3943_2453	Q06174	Geobacillus stearothermophilus		Carboxylesterase (EC 3.1.1.1)	Propyl Acetate	Drug target		100	98	80	1e-119
BLASTP	Human Homolog	Human	Bacillus coagulans 36D1	fig|345219.8.peg.1174	BcoaDRAFT_4656	VBIBacCoa3943_1174	NP_005882.2	Homo sapiens		3-ketoacyl-CoA thiolase (EC 2.3.1.16) @ Acetyl-CoA acetyltransferase (EC 2.3.1.9)				97	98	53	4e-141
FBA	Essential Gene	PATRIC	Bacillus coagulans 36D1	fig|345219.8.peg.1430	BcoaDRAFT_4902	VBIBacCoa3943_1430				SSU ribosomal protein S18p @ SSU ribosomal protein S18p, zinc-independent	Essential gene, predicted using metabolic flux-balance analysis in LB media
K-mer Search	Antibiotic Resistance	PATRIC	Bacillus coagulans 36D1	fig|345219.8.peg.1290	BcoaDRAFT_4766	VBIBacCoa3943_1290				SSU ribosomal protein S12p (S23e)		antibiotic target in susceptible species	7934937
FBA	Essential Gene	PATRIC	Bacillus coagulans 36D1	fig|345219.8.peg.1279	BcoaDRAFT_4755	VBIBacCoa3943_1279				LSU ribosomal protein L22p (L17e)	Essential gene, predicted using metabolic flux-balance analysis in LB media
FBA	Essential Gene	PATRIC	Bacillus coagulans 36D1	fig|345219.8.peg.1274	BcoaDRAFT_4750	VBIBacCoa3943_1274				LSU ribosomal protein L14p (L23e)	Essential gene, predicted using metabolic flux-balance analysis in LB media
FBA	Essential Gene	PATRIC	Bacillus coagulans 36D1	fig|345219.8.peg.2817	BcoaDRAFT_6161	VBIBacCoa3943_2817				LSU ribosomal protein L35p	Essential gene, predicted using metabolic flux-balance analysis in LB media
K-mer Search	Antibiotic Resistance	PATRIC	Bacillus coagulans 36D1	fig|345219.8.peg.655	BcoaDRAFT_4201	VBIBacCoa3943_0655				weak similarity to aminoglycoside N(3)-acetyltransferase		antibiotic inactivation enzyme	;
BLASTP	Human Homolog	Human	Bacillus coagulans 36D1	fig|345219.8.peg.3399	BcoaDRAFT_3382	VBIBacCoa3943_3399	NP_002622.2	Homo sapiens		6-phosphogluconate dehydrogenase, decarboxylating (EC 1.1.1.44)				97	99	57	0
FBA	Essential Gene	PATRIC	Bacillus coagulans 36D1	fig|345219.8.peg.3184	BcoaDRAFT_3191	VBIBacCoa3943_3184				Dihydrolipoamide acyltransferase component of branched-chain alpha-keto acid dehydrogenase complex (EC 2.3.1.168)	Essential gene, predicted using metabolic flux-balance analysis in LB media
FBA	Essential Gene	PATRIC	Bacillus coagulans 36D1	fig|345219.8.peg.1440	BcoaDRAFT_4909	VBIBacCoa3943_1440				Two-component sensor kinase SA14-24	Essential gene, predicted using metabolic flux-balance analysis in LB media
FBA	Essential Gene	PATRIC	Bacillus coagulans 36D1	fig|345219.8.peg.974	BcoaDRAFT_4482	VBIBacCoa3943_0974				5,10-methylenetetrahydrofolate reductase (EC 1.5.1.20) / Homolog of homocysteine-binding domain	Essential gene, predicted using metabolic flux-balance analysis in LB media
FBA	Essential Gene	PATRIC	Bacillus coagulans 36D1	fig|345219.8.peg.1338	BcoaDRAFT_4817	VBIBacCoa3943_1338				Lysyl-tRNA synthetase (class II) (EC 6.1.1.6)	Essential gene, predicted using metabolic flux-balance analysis in LB media
FBA	Essential Gene	PATRIC	Bacillus coagulans 36D1	fig|345219.8.peg.1405	BcoaDRAFT_4880	VBIBacCoa3943_1405				Chromosomal replication initiator protein DnaA	Essential gene, predicted using metabolic flux-balance analysis in LB media
BLASTP	Human Homolog	Human	Bacillus coagulans 36D1	fig|345219.8.peg.2061	BcoaDRAFT_5473	VBIBacCoa3943_2061	XP_005254116.1	Homo sapiens		Biotin carboxylase of acetyl-CoA carboxylase (EC 6.3.4.14)				69	97	51	3e-149
BLAT	Drug Target	DrugBank	Bacillus coagulans CSIL1	fig|1298921.3.peg.3829		VBIBacCoa317185_3829	Q06174	Geobacillus stearothermophilus		Carboxylesterase (EC 3.1.1.1)	Propyl Acetate	Drug target		100	98	80	1e-120
K-mer Search	Antibiotic Resistance	PATRIC	Bacillus coagulans CSIL1	fig|1298921.3.peg.2185		VBIBacCoa317185_2185				Translation elongation factor Tu		antibiotic target in susceptible species	364475;9678602
BLASTP	Human Homolog	Human	Bacillus coagulans CSIL1	fig|1298921.3.peg.2426		VBIBacCoa317185_2426	NP_001071.1	Homo sapiens		Succinate-semialdehyde dehydrogenase [NAD(P)+] (EC 1.2.1.16)				85	95	55	2e-160
BLASTP	Human Homolog	Human	Bacillus coagulans CSIL1	fig|1298921.3.peg.3084		VBIBacCoa317185_3084	NP_550433.1	Homo sapiens		Uracil-DNA glycosylase, family 1 (EC 3.2.2.27)				69	95	51	1e-70
BLASTP	Human Homolog	Human	Bacillus coagulans CSIL1	fig|1298921.3.peg.640		VBIBacCoa317185_0640	XP_005251533.1	Homo sapiens		Aconitate hydratase (EC 4.2.1.3)				97	95	54	0
K-mer Search	Antibiotic Resistance	PATRIC	Bacillus coagulans CSIL1	fig|1298921.3.peg.1908		VBIBacCoa317185_1908				Dihydropteroate synthase (EC 2.5.1.15)		antibiotic target in susceptible species	15673783
BLASTP	Human Homolog	Human	Bacillus coagulans CSIL1	fig|1298921.3.peg.1415		VBIBacCoa317185_1415	NP_005882.2	Homo sapiens		3-ketoacyl-CoA thiolase (EC 2.3.1.16) @ Acetyl-CoA acetyltransferase (EC 2.3.1.9)				97	98	53	2e-140
BLASTP	Human Homolog	Human	Bacillus coagulans CSIL1	fig|1298921.3.peg.725		VBIBacCoa317185_0725	NP_001924.2	Homo sapiens		Dihydrolipoamide succinyltransferase component (E2) of 2-oxoglutarate dehydrogenase complex (EC 2.3.1.61)				55	58	52	5e-82
K-mer Search	Antibiotic Resistance	PATRIC	Bacillus coagulans CSIL1	fig|1298921.3.peg.2190		VBIBacCoa317185_2190				DNA-directed RNA polymerase beta' subunit (EC 2.7.7.6)		antibiotic target in susceptible species	16723576
BLASTP	Human Homolog	Human	Bacillus coagulans CSIL1	fig|1298921.3.peg.2794		VBIBacCoa317185_2794	XP_005246575.1	Homo sapiens		Heat shock protein 60 kDa family chaperone GroEL				91	96	52	0
BLAT	Drug Target	DrugBank	Bacillus coagulans CSIL1	fig|1298921.3.peg.3443		VBIBacCoa317185_3443	P00362	Geobacillus stearothermophilus		NAD-dependent glyceraldehyde-3-phosphate dehydrogenase (EC 1.2.1.12)	Glyceraldehyde-3-Phosphate	Drug target		100	100	84	1e-160
BLAT	Drug Target	DrugBank	Bacillus coagulans CSIL1	fig|1298921.3.peg.1742		VBIBacCoa317185_1742	Q5KUI2	Geobacillus kaustophilus (strain HTA426)		Serine hydroxymethyltransferase (EC 2.1.2.1)	(6R)-Folinic acid	Drug target		98	97	82	1e-195
K-mer Search	Antibiotic Resistance	PATRIC	Bacillus coagulans CSIL1	fig|1298921.3.peg.761		VBIBacCoa317185_0761				DNA gyrase subunit B (EC 5.99.1.3)		antibiotic target in susceptible species	21693461;22279180;9293187
BLASTP	Human Homolog	Human	Bacillus coagulans CSIL1	fig|1298921.3.peg.724		VBIBacCoa317185_0724	NP_000681.2	Homo sapiens		Aldehyde dehydrogenase (EC 1.2.1.3)				92	95	55	0
BLAT	Virulence Factor	Victors	Bacillus coagulans CSIL1	fig|1298921.3.peg.1880		VBIBacCoa317185_1880	227813264	Bacillus anthracis str. CDC 684		GTP-sensing transcriptional pleiotropic repressor CodY			19651859	98	98	82	1e-115
BLASTP	Human Homolog	Human	Bacillus coagulans CSIL1	fig|1298921.3.peg.33		VBIBacCoa317185_0033	NP_004125.3	Homo sapiens		Chaperone protein DnaK				91	97	55	0
BLASTP	Human Homolog	Human	Bacillus coagulans CSIL1	fig|1298921.3.peg.387		VBIBacCoa317185_0387	NP_002622.2	Homo sapiens		6-phosphogluconate dehydrogenase, decarboxylating (EC 1.1.1.44)				97	99	57	0
K-mer Search	Antibiotic Resistance	PATRIC	Bacillus coagulans CSIL1	fig|1298921.3.peg.2280		VBIBacCoa317185_2280				Isoleucyl-tRNA synthetase (EC 6.1.1.5)		antibiotic target in susceptible species	7929087
BLASTP	Human Homolog	Human	Bacillus coagulans CSIL1	fig|1298921.3.peg.1592		VBIBacCoa317185_1592	NP_001743.1	Homo sapiens		Catalase KatE (EC 1.11.1.6)				89	95	51	3e-166
K-mer Search	Antibiotic Resistance	PATRIC	Bacillus coagulans CSIL1	fig|1298921.3.peg.2186		VBIBacCoa317185_2186				Translation elongation factor G		antibiotic target in susceptible species	17980694;19289529;19289529;17325218;19289529
BLASTP	Human Homolog	Human	Bacillus coagulans CSIL1	fig|1298921.3.peg.2291		VBIBacCoa317185_2291	NP_000008.1	Homo sapiens		Acyl-CoA dehydrogenase, short-chain specific (EC 1.3.8.1)				91	98	52	1e-132
BLAT	Virulence Factor	Victors	Bacillus coagulans CSIL1	fig|1298921.3.peg.1971		VBIBacCoa317185_1971	227817253	Bacillus anthracis str. CDC 684		ATP-dependent Clp protease ATP-binding subunit ClpX			20375606	98	97	85	1e-203
K-mer Search	Antibiotic Resistance	PATRIC	Bacillus coagulans CSIL1	fig|1298921.3.peg.1590		VBIBacCoa317185_1590				Undecaprenyl-diphosphatase BcrC (EC 3.6.1.27), conveys bacitracin resistance		antibiotic target protection protein	12486040;15778224;15946938
BLASTP	Human Homolog	Human	Bacillus coagulans CSIL1	fig|1298921.3.peg.3006		VBIBacCoa317185_3006	NP_005434.4	Homo sapiens		Adenylylsulfate kinase (EC 2.7.1.25)				32	97	53	5e-68
K-mer Search	Antibiotic Resistance	PATRIC	Bacillus coagulans CSIL1	fig|1298921.3.peg.3358		VBIBacCoa317185_3358				Enoyl-[acyl-carrier-protein] reductase [NADPH] (EC 1.3.1.104), FabL		antibiotic target replacement protein	21185310
BLASTP	Human Homolog	Human	Bacillus coagulans CSIL1	fig|1298921.3.peg.1220		VBIBacCoa317185_1220	XP_005269899.1	Homo sapiens		S-adenosylmethionine synthetase (EC 2.5.1.6)				94	95	59	3e-151
BLAT	Transporter	TCDB	Bacillus coagulans CSIL1	fig|1298921.3.peg.276		VBIBacCoa317185_0276	P46912	Bacillus subtilis		Menaquinone-cytochrome c reductase, cytochrome B subunit	the proton-translocating quinol:cytochrome c reductase (qcr) superfamily.	3.D.3.4.1	7592464;8760912;9384377;9535866	100	100	89	1e-119
K-mer Search	Antibiotic Resistance	PATRIC	Bacillus coagulans CSIL1	fig|1298921.3.peg.3241		VBIBacCoa317185_3241				1-deoxy-D-xylulose 5-phosphate reductoisomerase (EC 1.1.1.267)		antibiotic target in susceptible species	16321944
BLASTP	Human Homolog	Human	Bacillus coagulans CSIL1	fig|1298921.3.peg.430		VBIBacCoa317185_0430	NP_004484.1	Homo sapiens		hypothetical protein				95	96	61	2e-100
K-mer Search	Antibiotic Resistance	PATRIC	Bacillus coagulans CSIL1	fig|1298921.3.peg.774		VBIBacCoa317185_0774				16S rRNA (guanine(527)-N(7))-methyltransferase (EC 2.1.1.170)		gene conferring resistance via absence	17238915
K-mer Search	Antibiotic Resistance	PATRIC	Bacillus coagulans CSIL1	fig|1298921.3.peg.1196		VBIBacCoa317185_1196				Dihydrofolate reductase (EC 1.5.1.3)		antibiotic target in susceptible species	20169085;25288078
BLAT	Drug Target	TTD	Bacillus coagulans CSIL1	fig|1298921.3.peg.2185		VBIBacCoa317185_2185	TTDI02058			Translation elongation factor Tu				98	98	85	1e-197
K-mer Search	Antibiotic Resistance	PATRIC	Bacillus coagulans CSIL1	fig|1298921.3.peg.1362		VBIBacCoa317185_1362				3-oxoacyl-[acyl-carrier-protein] synthase, KASII (EC 2.3.1.179)		antibiotic target in susceptible species	10428945
K-mer Search	Antibiotic Resistance	PATRIC	Bacillus coagulans CSIL1	fig|1298921.3.peg.1758		VBIBacCoa317185_1758				UDP-N-acetylglucosamine 1-carboxyvinyltransferase (EC 2.5.1.7)		antibiotic target in susceptible species	8994972
BLAT	Transporter	TCDB	Bacillus coagulans CSIL1	fig|1298921.3.peg.2000		VBIBacCoa317185_2000	Q65GF4	Bacillus licheniformis (strain DSM 13 / ATCC 14580)		Succinate dehydrogenase flavoprotein subunit (EC 1.3.5.1)	the prokaryotic succinate dehydrogenase (sdh) family.	3.D.10.1.1	15383718;15461803	93	94	85	1e-288
K-mer Search	Antibiotic Resistance	PATRIC	Bacillus coagulans CSIL1	fig|1298921.3.peg.670		VBIBacCoa317185_0670				Two-component sensor histidine kinase BceS		regulator modulating expression of antibiotic resistance genes	25118291
K-mer Search	Antibiotic Resistance	PATRIC	Bacillus coagulans CSIL1	fig|1298921.3.peg.593		VBIBacCoa317185_0593				weak similarity to aminoglycoside N(3)-acetyltransferase		antibiotic inactivation enzyme	;
BLAT	Transporter	TCDB	Bacillus coagulans CSIL1	fig|1298921.3.peg.1828		VBIBacCoa317185_1828	P26904	Bacillus subtilis		Dipeptide ABC transporter, permease protein DppC (TC 3.A.1.5.2)	the atp-binding cassette (abc) superfamily.	3.A.1.5.2	11069674;11473256;1766370;19383706;3145906;9384377	89	89	80	1e-135
BLASTP	Human Homolog	Human	Bacillus coagulans CSIL1	fig|1298921.3.peg.2897		VBIBacCoa317185_2897	XP_006724053.1	Homo sapiens		Phosphoribosylformylglycinamidine cyclo-ligase (EC 6.3.3.1)				33	95	50	4e-104
K-mer Search	Antibiotic Resistance	PATRIC	Bacillus coagulans CSIL1	fig|1298921.3.peg.2047		VBIBacCoa317185_2047				Enoyl-[acyl-carrier-protein] reductase [NADH] (EC 1.3.1.9)		antibiotic target in susceptible species	18193820;10869170;8284673
BLASTP	Human Homolog	Human	Bacillus coagulans CSIL1	fig|1298921.3.peg.3443		VBIBacCoa317185_3443	NP_002037.2	Homo sapiens		NAD-dependent glyceraldehyde-3-phosphate dehydrogenase (EC 1.2.1.12)				98	98	52	8e-117
K-mer Search	Antibiotic Resistance	PATRIC	Bacillus coagulans CSIL1	fig|1298921.3.peg.1726		VBIBacCoa317185_1726				UDP-N-acetylglucosamine 1-carboxyvinyltransferase (EC 2.5.1.7)		antibiotic target in susceptible species	8994972
BLASTP	Human Homolog	Human	Bacillus coagulans CSIL1	fig|1298921.3.peg.1871		VBIBacCoa317185_1871	NP_003840.2	Homo sapiens		Succinyl-CoA ligase [ADP-forming] alpha chain (EC 6.2.1.5)				85	97	62	2e-105
BLASTP	Human Homolog	Human	Bacillus coagulans CSIL1	fig|1298921.3.peg.2542		VBIBacCoa317185_2542	NP_006102.2	Homo sapiens		Acetyl-CoA acetyltransferase (EC 2.3.1.9)				97	98	51	6e-140
K-mer Search	Antibiotic Resistance	PATRIC	Bacillus coagulans CSIL1	fig|1298921.3.peg.3559		VBIBacCoa317185_3559				Streptogramin O-acetyltransferase, putative		antibiotic inactivation enzyme	;
BLASTP	Human Homolog	Human	Bacillus coagulans CSIL1	fig|1298921.3.peg.1733		VBIBacCoa317185_1733	NP_001001937.1	Homo sapiens		ATP synthase alpha chain (EC 3.6.3.14)				91	98	58	0
BLASTP	Human Homolog	Human	Bacillus coagulans CSIL1	fig|1298921.3.peg.263		VBIBacCoa317185_0263	NP_002504.2	Homo sapiens		Nucleoside diphosphate kinase (EC 2.7.4.6)				86	99	59	2e-62
K-mer Search	Antibiotic Resistance	PATRIC	Bacillus coagulans CSIL1	fig|1298921.3.peg.1704		VBIBacCoa317185_1704				D-alanine--D-alanine ligase (EC 6.3.2.4)		antibiotic target in susceptible species	24303782;24033232
BLAT	Drug Target	DrugBank	Bacillus coagulans CSIL1	fig|1298921.3.peg.630		VBIBacCoa317185_0630	Q59192	Bacillus subtilis (strain 168)		DNA topoisomerase IV subunit B (EC 5.99.1.3)	Ciprofloxacin	Drug target		83	83	83	1e-272
BLASTP	Human Homolog	Human	Bacillus coagulans CSIL1	fig|1298921.3.peg.146		VBIBacCoa317185_0146	XP_005254116.1	Homo sapiens		Biotin carboxylase of acetyl-CoA carboxylase (EC 6.3.4.14)				68	97	50	3e-150
BLASTP	Human Homolog	Human	Bacillus coagulans CSIL1	fig|1298921.3.peg.2126		VBIBacCoa317185_2126	XP_006717934.1	Homo sapiens		Ornithine aminotransferase (EC 2.6.1.13)				89	96	50	8e-139
BLASTP	Human Homolog	Human	Bacillus coagulans CSIL1	fig|1298921.3.peg.2417		VBIBacCoa317185_2417	NP_079523.3	Homo sapiens		Acyl-CoA dehydrogenase				37	95	59	3e-166
BLASTP	Human Homolog	Human	Bacillus coagulans CSIL1	fig|1298921.3.peg.1195		VBIBacCoa317185_1195	NP_001062.1	Homo sapiens		Thymidylate synthase (EC 2.1.1.45)				90	98	55	1e-104
BLASTP	Human Homolog	Human	Bacillus coagulans CSIL1	fig|1298921.3.peg.432		VBIBacCoa317185_0432	NP_542407.2	Homo sapiens		O-acetyl-ADP-ribose deacetylase				38	85	54	3e-48
BLAT	Transporter	TCDB	Bacillus coagulans CSIL1	fig|1298921.3.peg.980		VBIBacCoa317185_0980	Q01465	Bacillus subtilis (strain 168)		Rod shape-determining protein MreB	the cell shape-determining mrebcd (mrebcd) family.	9.B.157.1.1		97	97	84	1e-153
BLASTP	Human Homolog	Human	Bacillus coagulans CSIL1	fig|1298921.3.peg.1731		VBIBacCoa317185_1731	NP_001677.2	Homo sapiens		ATP synthase beta chain (EC 3.6.3.14)				87	98	68	0
BLAT	Drug Target	DrugBank	Bacillus coagulans CSIL1	fig|1298921.3.peg.2641		VBIBacCoa317185_2641	P96622	Bacillus subtilis (strain 168)		Programmed cell death toxin YdcE	2-(2-{2-[2-(2-Methoxy-Ethoxy)-Ethoxy]-Ethoxy}-Ethoxy)-Ethanol	Drug target		83	96	89	3e-43
BLAT	Transporter	TCDB	Bacillus coagulans CSIL1	fig|1298921.3.peg.556		VBIBacCoa317185_0556	E1UCI2	Listeria monocytogenes serotype 4a (strain L99)		PTS system, mannose-specific IID component	the pts mannose-fructose-sorbose (man) family.	4.A.6.1.15		97	97	81	1e-146
K-mer Search	Antibiotic Resistance	PATRIC	Bacillus coagulans CSIL1	fig|1298921.3.peg.2168		VBIBacCoa317185_2168				LSU ribosomal protein L6p (L9e)		antibiotic target in susceptible species	19289529;17923494
BLAT	Transporter	TCDB	Bacillus coagulans CSIL1	fig|1298921.3.peg.33		VBIBacCoa317185_0033	G4NXA5	Bacillus subtilis subsp. spizizenii TU-B-10		Chaperone protein DnaK	the cation channel-forming heat shock protein-70 (hsp70) family.	1.A.33.1.4		95	95	85	1e-288
BLASTP	Human Homolog	Human	Bacillus coagulans CSIL1	fig|1298921.3.peg.1971		VBIBacCoa317185_1971	NP_006651.2	Homo sapiens		ATP-dependent Clp protease ATP-binding subunit ClpX				51	72	52	1e-101
BLAT	Transporter	TCDB	Bacillus coagulans CSIL1	fig|1298921.3.peg.1998		VBIBacCoa317185_1998	Q65GF5	Bacillus licheniformis (strain DSM 13 / ATCC 14580)		Succinate dehydrogenase iron-sulfur protein (EC 1.3.5.1)	the prokaryotic succinate dehydrogenase (sdh) family.	3.D.10.1.1	15383718;15461803	99	99	81	1e-128
BLASTP	Human Homolog	Human	Bacillus coagulans CSIL1	fig|1298921.3.peg.2808		VBIBacCoa317185_2808	NP_001081.1	Homo sapiens		Vitamin B12 ABC transporter, ATP-binding protein BtuD				5	55	52	5e-07
BLAT	Virulence Factor	PATRIC_VF	Bacillus coagulans CSIL1	fig|1298921.3.peg.799		VBIBacCoa317185_0799	lmo0055	Listeria monocytogenes EGD-e		Adenylosuccinate synthetase (EC 6.3.4.4)		Intracellular survival and replication	20955543	99	99	83	1e-213
BLAT	Transporter	TCDB	Bacillus coagulans CSIL1	fig|1298921.3.peg.138		VBIBacCoa317185_0138	P49780	Bacillus subtilis		Stage III sporulation protein AC	the multicomponent putative spoiiiae exporter (spoiiia-e) family.	9.B.70.1.1	1766372;19383706;8969508;9384377	98	100	83	8e-26
K-mer Search	Antibiotic Resistance	PATRIC	Bacillus coagulans CSIL1	fig|1298921.3.peg.760		VBIBacCoa317185_0760				DNA gyrase subunit A (EC 5.99.1.3)		antibiotic target in susceptible species	9293187
K-mer Search	Antibiotic Resistance	PATRIC	Bacillus coagulans CSIL1	fig|1298921.3.peg.672		VBIBacCoa317185_0672				Bacitracin export permease protein BceB		efflux pump conferring antibiotic resistance	25118291
K-mer Search	Antibiotic Resistance	PATRIC	Bacillus coagulans CSIL1	fig|1298921.3.peg.2184		VBIBacCoa317185_2184				SSU ribosomal protein S10p (S20e)		antibiotic target in susceptible species	26124155
K-mer Search	Antibiotic Resistance	PATRIC	Bacillus coagulans CSIL1	fig|1298921.3.peg.3862		VBIBacCoa317185_3862				Broad-specificity multidrug efflux pump YkkC		efflux pump conferring antibiotic resistance	10735877
BLAT	Virulence Factor	PATRIC_VF	Bacillus coagulans CSIL1	fig|1298921.3.peg.2891		VBIBacCoa317185_2891	LMOh7858_1898	Listeria monocytogenes serotype 4b str. H7858		Adenylosuccinate lyase (EC 4.3.2.2) @ SAICAR lyase (EC 4.3.2.2)		Virulence	22506772	91	90	83	1e-194
K-mer Search	Antibiotic Resistance	PATRIC	Bacillus coagulans CSIL1	fig|1298921.3.peg.671		VBIBacCoa317185_0671				Bacitracin export ATP-binding protein BceA		efflux pump conferring antibiotic resistance	25118291
K-mer Search	Antibiotic Resistance	PATRIC	Bacillus coagulans CSIL1	fig|1298921.3.peg.2188		VBIBacCoa317185_2188				SSU ribosomal protein S12p (S23e)		antibiotic target in susceptible species	7934937
K-mer Search	Antibiotic Resistance	PATRIC	Bacillus coagulans CSIL1	fig|1298921.3.peg.1143		VBIBacCoa317185_1143				CDP-diacylglycerol--glycerol-3-phosphate 3-phosphatidyltransferase (EC 2.7.8.5)		protein altering cell wall charge conferring antibiotic resistance	22238576
BLASTP	Human Homolog	Human	Bacillus coagulans CSIL1	fig|1298921.3.peg.2185		VBIBacCoa317185_2185	NP_003312.3	Homo sapiens		Translation elongation factor Tu				85	98	58	4e-167
BLASTP	Human Homolog	Human	Bacillus coagulans CSIL1	fig|1298921.3.peg.1362		VBIBacCoa317185_1362	XP_006713279.1	Homo sapiens		3-oxoacyl-[acyl-carrier-protein] synthase, KASII (EC 2.3.1.179)				90	98	50	2e-131
K-mer Search	Antibiotic Resistance	PATRIC	Bacillus coagulans CSIL1	fig|1298921.3.peg.1756		VBIBacCoa317185_1756				Transcription termination factor Rho		antibiotic target in susceptible species	8466900
BLASTP	Human Homolog	Human	Bacillus coagulans CSIL1	fig|1298921.3.peg.3347		VBIBacCoa317185_3347	NP_000134.2	Homo sapiens		Fumarate hydratase class II (EC 4.2.1.2)				89	98	59	0
BLASTP	Human Homolog	Human	Bacillus coagulans CSIL1	fig|1298921.3.peg.2402		VBIBacCoa317185_2402	NP_006003.1	Homo sapiens		ATP-dependent Clp protease proteolytic subunit ClpP (EC 3.4.21.92)				68	96	56	7e-74
BLAT	Drug Target	DrugBank	Bacillus coagulans CSIL1	fig|1298921.3.peg.1740		VBIBacCoa317185_1740	Q5KUI3	Geobacillus kaustophilus (strain HTA426)		Uracil phosphoribosyltransferase (EC 2.4.2.9)	Uridine-5'-Monophosphate	Drug target		97	97	83	3e-99
K-mer Search	Antibiotic Resistance	PATRIC	Bacillus coagulans CSIL1	fig|1298921.3.peg.669		VBIBacCoa317185_0669				Two-component response regulator BceR		regulator modulating expression of antibiotic resistance genes	25118291
K-mer Search	Antibiotic Resistance	PATRIC	Bacillus coagulans CSIL1	fig|1298921.3.peg.160		VBIBacCoa317185_0160				Glycerophosphoryl diester phosphodiesterase (EC 3.1.4.46)		protein altering cell wall charge conferring antibiotic resistance	21899450
BLASTP	Human Homolog	Human	Bacillus coagulans CSIL1	fig|1298921.3.peg.3438		VBIBacCoa317185_3438	NP_001966.1	Homo sapiens		Enolase (EC 4.2.1.11)				97	97	52	1e-148
BLASTP	Human Homolog	Human	Bacillus coagulans CSIL1	fig|1298921.3.peg.1700		VBIBacCoa317185_1700	NP_001776.1	Homo sapiens		Cytidine deaminase (EC 3.5.4.5)				87	98	51	4e-36
BLAT	Drug Target	DrugBank	Bacillus coagulans CSIL1	fig|1298921.3.peg.1057		VBIBacCoa317185_1057	P39126	Bacillus subtilis (strain 168)		Isocitrate dehydrogenase [NADP] (EC 1.1.1.42)	(R)-Propylene glycol;Citric Acid;S-1,2-Propanediol;S,S-(2-Hydroxyethyl)Thiocysteine'	Drug target		99	99	89	1e-222
BLASTP	Human Homolog	Human	Bacillus coagulans CSIL1	fig|1298921.3.peg.78		VBIBacCoa317185_0078	NP_001019636.1	Homo sapiens		Superoxide dismutase [Mn] (EC 1.15.1.1)				88	99	52	4e-69
K-mer Search	Antibiotic Resistance	PATRIC	Bacillus coagulans CSIL1	fig|1298921.3.peg.2639		VBIBacCoa317185_2639				Alanine racemase (EC 5.1.1.1)		antibiotic target in susceptible species	19748470;24303782
K-mer Search	Antibiotic Resistance	PATRIC	Bacillus coagulans CSIL1	fig|1298921.3.peg.2191		VBIBacCoa317185_2191				DNA-directed RNA polymerase beta subunit (EC 2.7.7.6)		antibiotic target in susceptible species	3050121;15047531;16723576
FBA	Essential Gene	PATRIC	Bacillus coagulans DSM 1 = ATCC 7050	fig|1121088.10.peg.1219	BF29_1081				tyrS	Tyrosyl-tRNA synthetase (EC 6.1.1.1)	Essential gene, predicted using metabolic flux-balance analysis in LB media
FBA	Essential Gene	PATRIC	Bacillus coagulans DSM 1 = ATCC 7050	fig|1121088.10.peg.777	BF29_692				bfmBAB	Branched-chain alpha-keto acid dehydrogenase, E1 component, beta subunit (EC 1.2.4.4)	Essential gene, predicted using metabolic flux-balance analysis in LB media
K-mer Search	Antibiotic Resistance	PATRIC	Bacillus coagulans DSM 1 = ATCC 7050	fig|1121088.10.peg.2660	BF29_2431				rplF	LSU ribosomal protein L6p (L9e)		antibiotic target in susceptible species	19289529;17923494
FBA	Essential Gene	PATRIC	Bacillus coagulans DSM 1 = ATCC 7050	fig|1121088.10.peg.2657	BF29_2428				rplE	LSU ribosomal protein L5p (L11e)	Essential gene, predicted using metabolic flux-balance analysis in LB media
FBA	Essential Gene	PATRIC	Bacillus coagulans DSM 1 = ATCC 7050	fig|1121088.10.peg.146	BF29_129				fabD	Malonyl CoA-acyl carrier protein transacylase (EC 2.3.1.39)	Essential gene, predicted using metabolic flux-balance analysis in LB media
FBA	Essential Gene	PATRIC	Bacillus coagulans DSM 1 = ATCC 7050	fig|1121088.10.peg.1313	BF29_1160				menB	Naphthoate synthase (EC 4.1.3.36)	Essential gene, predicted using metabolic flux-balance analysis in LB media
BLAT	Drug Target	DrugBank	Bacillus coagulans DSM 1 = ATCC 7050	fig|1121088.10.peg.2266	BF29_2048		Q5KUI3	Geobacillus kaustophilus (strain HTA426)	upp	Uracil phosphoribosyltransferase (EC 2.4.2.9)	Uridine-5'-Monophosphate	Drug target		97	97	83	9e-99
FBA	Essential Gene	PATRIC	Bacillus coagulans DSM 1 = ATCC 7050	fig|1121088.10.peg.563	BF29_495				murB	UDP-N-acetylenolpyruvoylglucosamine reductase (EC 1.3.1.98)	Essential gene, predicted using metabolic flux-balance analysis in LB media
K-mer Search	Antibiotic Resistance	PATRIC	Bacillus coagulans DSM 1 = ATCC 7050	fig|1121088.10.peg.1476	BF29_1321				bcrC	Undecaprenyl-diphosphatase BcrC (EC 3.6.1.27), conveys bacitracin resistance		antibiotic target protection protein	12486040;15778224;15946938
K-mer Search	Antibiotic Resistance	PATRIC	Bacillus coagulans DSM 1 = ATCC 7050	fig|1121088.10.peg.2638	BF29_2409				rpoC	DNA-directed RNA polymerase beta' subunit (EC 2.7.7.6)		antibiotic target in susceptible species	16723576
FBA	Essential Gene	PATRIC	Bacillus coagulans DSM 1 = ATCC 7050	fig|1121088.10.peg.2641	BF29_2412				rpsG	SSU ribosomal protein S7p (S5e)	Essential gene, predicted using metabolic flux-balance analysis in LB media
FBA	Essential Gene	PATRIC	Bacillus coagulans DSM 1 = ATCC 7050	fig|1121088.10.peg.2633	BF29_2404				rplA	LSU ribosomal protein L1p (L10Ae)	Essential gene, predicted using metabolic flux-balance analysis in LB media
FBA	Essential Gene	PATRIC	Bacillus coagulans DSM 1 = ATCC 7050	fig|1121088.10.peg.3123	BF29_2839				metH	5-methyltetrahydrofolate--homocysteine methyltransferase (EC 2.1.1.13)	Essential gene, predicted using metabolic flux-balance analysis in LB media
FBA	Essential Gene	PATRIC	Bacillus coagulans DSM 1 = ATCC 7050	fig|1121088.10.peg.735	BF29_651				scpB	Segregation and condensation protein B	Essential gene, predicted using metabolic flux-balance analysis in LB media
FBA	Essential Gene	PATRIC	Bacillus coagulans DSM 1 = ATCC 7050	fig|1121088.10.peg.88	BF29_78				ileS	Isoleucyl-tRNA synthetase (EC 6.1.1.5)	Essential gene, predicted using metabolic flux-balance analysis in LB media
FBA	Essential Gene	PATRIC	Bacillus coagulans DSM 1 = ATCC 7050	fig|1121088.10.peg.2640	BF29_2411				rpsL	SSU ribosomal protein S12p (S23e)	Essential gene, predicted using metabolic flux-balance analysis in LB media
FBA	Essential Gene	PATRIC	Bacillus coagulans DSM 1 = ATCC 7050	fig|1121088.10.peg.1667	BF29_1510				ilvB	Acetolactate synthase large subunit (EC 2.2.1.6)	Essential gene, predicted using metabolic flux-balance analysis in LB media
FBA	Essential Gene	PATRIC	Bacillus coagulans DSM 1 = ATCC 7050	fig|1121088.10.peg.3099	BF29_2822				uppP	Undecaprenyl-diphosphatase (EC 3.6.1.27)	Essential gene, predicted using metabolic flux-balance analysis in LB media
K-mer Search	Antibiotic Resistance	PATRIC	Bacillus coagulans DSM 1 = ATCC 7050	fig|1121088.10.peg.400	BF29_350					Two-component response regulator BceR		regulator modulating expression of antibiotic resistance genes	25118291
FBA	Essential Gene	PATRIC	Bacillus coagulans DSM 1 = ATCC 7050	fig|1121088.10.peg.1719	BF29_1554				cax	Ca(2+)/H(+) antiporter	Essential gene, predicted using metabolic flux-balance analysis in LB media
FBA	Essential Gene	PATRIC	Bacillus coagulans DSM 1 = ATCC 7050	fig|1121088.10.peg.3256	BF29_2953				nadB	L-aspartate oxidase (EC 1.4.3.16)	Essential gene, predicted using metabolic flux-balance analysis in LB media
FBA	Essential Gene	PATRIC	Bacillus coagulans DSM 1 = ATCC 7050	fig|1121088.10.peg.136	BF29_120				rpmB	LSU ribosomal protein L28p @ LSU ribosomal protein L28p, zinc-independent	Essential gene, predicted using metabolic flux-balance analysis in LB media
FBA	Essential Gene	PATRIC	Bacillus coagulans DSM 1 = ATCC 7050	fig|1121088.10.peg.1669	BF29_1511				ilvD	Dihydroxy-acid dehydratase (EC 4.2.1.9)	Essential gene, predicted using metabolic flux-balance analysis in LB media
FBA	Essential Gene	PATRIC	Bacillus coagulans DSM 1 = ATCC 7050	fig|1121088.10.peg.2399	BF29_2166					Methionine ABC transporter substrate-binding protein	Essential gene, predicted using metabolic flux-balance analysis in LB media
FBA	Essential Gene	PATRIC	Bacillus coagulans DSM 1 = ATCC 7050	fig|1121088.10.peg.3328	BF29_3010					Cystathionine gamma-synthase (EC 2.5.1.48)	Essential gene, predicted using metabolic flux-balance analysis in LB media
FBA	Essential Gene	PATRIC	Bacillus coagulans DSM 1 = ATCC 7050	fig|1121088.10.peg.1037	BF29_924				rplU	LSU ribosomal protein L21p	Essential gene, predicted using metabolic flux-balance analysis in LB media
K-mer Search	Antibiotic Resistance	PATRIC	Bacillus coagulans DSM 1 = ATCC 7050	fig|1121088.10.peg.2428	BF29_2190					Glycerophosphoryl diester phosphodiesterase (EC 3.1.4.46)		protein altering cell wall charge conferring antibiotic resistance	21899450
K-mer Search	Antibiotic Resistance	PATRIC	Bacillus coagulans DSM 1 = ATCC 7050	fig|1121088.10.peg.219	BF29_196				dxr	1-deoxy-D-xylulose 5-phosphate reductoisomerase (EC 1.1.1.267)		antibiotic target in susceptible species	16321944
FBA	Essential Gene	PATRIC	Bacillus coagulans DSM 1 = ATCC 7050	fig|1121088.10.peg.2619	BF29_2392				gltX	Glutamyl-tRNA synthetase (EC 6.1.1.17) @ Glutamyl-tRNA(Gln) synthetase (EC 6.1.1.24)	Essential gene, predicted using metabolic flux-balance analysis in LB media
FBA	Essential Gene	PATRIC	Bacillus coagulans DSM 1 = ATCC 7050	fig|1121088.10.peg.2659	BF29_2430				rpsH	SSU ribosomal protein S8p (S15Ae)	Essential gene, predicted using metabolic flux-balance analysis in LB media
FBA	Essential Gene	PATRIC	Bacillus coagulans DSM 1 = ATCC 7050	fig|1121088.10.peg.2400	BF29_2167					Methionine ABC transporter permease protein	Essential gene, predicted using metabolic flux-balance analysis in LB media
FBA	Essential Gene	PATRIC	Bacillus coagulans DSM 1 = ATCC 7050	fig|1121088.10.peg.1665	BF29_1508				ilvC	Ketol-acid reductoisomerase (NADP(+)) (EC 1.1.1.86)	Essential gene, predicted using metabolic flux-balance analysis in LB media
K-mer Search	Antibiotic Resistance	PATRIC	Bacillus coagulans DSM 1 = ATCC 7050	fig|1121088.10.peg.2296	BF29_2076				murA	UDP-N-acetylglucosamine 1-carboxyvinyltransferase (EC 2.5.1.7)		antibiotic target in susceptible species	8994972
FBA	Essential Gene	PATRIC	Bacillus coagulans DSM 1 = ATCC 7050	fig|1121088.10.peg.1212	BF29_1075				rpsD	SSU ribosomal protein S4p (S9e) @ SSU ribosomal protein S4p (S9e), zinc-independent	Essential gene, predicted using metabolic flux-balance analysis in LB media
FBA	Essential Gene	PATRIC	Bacillus coagulans DSM 1 = ATCC 7050	fig|1121088.10.peg.1278	BF29_1131				leuS	Leucyl-tRNA synthetase (EC 6.1.1.4)	Essential gene, predicted using metabolic flux-balance analysis in LB media
FBA	Essential Gene	PATRIC	Bacillus coagulans DSM 1 = ATCC 7050	fig|1121088.10.peg.2669	BF29_2440				rpsK	SSU ribosomal protein S11p (S14e)	Essential gene, predicted using metabolic flux-balance analysis in LB media
FBA	Essential Gene	PATRIC	Bacillus coagulans DSM 1 = ATCC 7050	fig|1121088.10.peg.681	BF29_600				aroA	3-phosphoshikimate 1-carboxyvinyltransferase (EC 2.5.1.19)	Essential gene, predicted using metabolic flux-balance analysis in LB media
FBA	Essential Gene	PATRIC	Bacillus coagulans DSM 1 = ATCC 7050	fig|1121088.10.peg.3122	BF29_2838					5,10-methylenetetrahydrofolate reductase (EC 1.5.1.20) / Homolog of homocysteine-binding domain	Essential gene, predicted using metabolic flux-balance analysis in LB media
FBA	Essential Gene	PATRIC	Bacillus coagulans DSM 1 = ATCC 7050	fig|1121088.10.peg.2662	BF29_2433				rpsE	SSU ribosomal protein S5p (S2e)	Essential gene, predicted using metabolic flux-balance analysis in LB media
FBA	Essential Gene	PATRIC	Bacillus coagulans DSM 1 = ATCC 7050	fig|1121088.10.peg.2652	BF29_2423				rplP	LSU ribosomal protein L16p (L10e)	Essential gene, predicted using metabolic flux-balance analysis in LB media
FBA	Essential Gene	PATRIC	Bacillus coagulans DSM 1 = ATCC 7050	fig|1121088.10.peg.65	BF29_58				murE	UDP-N-acetylmuramoyl-dipeptide--2,6-diaminopimelate ligase (EC 6.3.2.13)	Essential gene, predicted using metabolic flux-balance analysis in LB media
FBA	Essential Gene	PATRIC	Bacillus coagulans DSM 1 = ATCC 7050	fig|1121088.10.peg.2415	BF29_2179					Uracil permease @ Uracil:proton symporter UraA	Essential gene, predicted using metabolic flux-balance analysis in LB media
FBA	Essential Gene	PATRIC	Bacillus coagulans DSM 1 = ATCC 7050	fig|1121088.10.peg.2520	BF29_2272				dnaN	DNA polymerase III beta subunit (EC 2.7.7.7)	Essential gene, predicted using metabolic flux-balance analysis in LB media
BLASTP	Human Homolog	Human	Bacillus coagulans DSM 1 = ATCC 7050	fig|1121088.10.peg.2984	BF29_2729		NP_001071.1	Homo sapiens		Succinate-semialdehyde dehydrogenase [NAD(P)+] (EC 1.2.1.16)				87	98	53	0
FBA	Essential Gene	PATRIC	Bacillus coagulans DSM 1 = ATCC 7050	fig|1121088.10.peg.3687	BF29_3309				hemH	Coproporphyrin ferrochelatase (EC 4.99.1.9)	Essential gene, predicted using metabolic flux-balance analysis in LB media
FBA	Essential Gene	PATRIC	Bacillus coagulans DSM 1 = ATCC 7050	fig|1121088.10.peg.1154	BF29_1023				rplT	LSU ribosomal protein L20p	Essential gene, predicted using metabolic flux-balance analysis in LB media
FBA	Essential Gene	PATRIC	Bacillus coagulans DSM 1 = ATCC 7050	fig|1121088.10.peg.3392	BF29_3061				thrB	Homoserine kinase (EC 2.7.1.39)	Essential gene, predicted using metabolic flux-balance analysis in LB media
BLAT	Drug Target	DrugBank	Bacillus coagulans DSM 1 = ATCC 7050	fig|1121088.10.peg.430	BF29_376		Q59192	Bacillus subtilis (strain 168)	parE	DNA topoisomerase IV subunit B (EC 5.99.1.3)	Ciprofloxacin	Drug target		83	83	83	1e-272
FBA	Essential Gene	PATRIC	Bacillus coagulans DSM 1 = ATCC 7050	fig|1121088.10.peg.1134	BF29_1007				pheS	Phenylalanyl-tRNA synthetase alpha chain (EC 6.1.1.20)	Essential gene, predicted using metabolic flux-balance analysis in LB media
K-mer Search	Antibiotic Resistance	PATRIC	Bacillus coagulans DSM 1 = ATCC 7050	fig|1121088.10.peg.2637	BF29_2408				rpoB	DNA-directed RNA polymerase beta subunit (EC 2.7.7.6)		antibiotic target in susceptible species	3050121;15047531;16723576
FBA	Essential Gene	PATRIC	Bacillus coagulans DSM 1 = ATCC 7050	fig|1121088.10.peg.126	BF29_111				priA	Helicase PriA essential for oriC/DnaA-independent DNA replication	Essential gene, predicted using metabolic flux-balance analysis in LB media
BLASTP	Human Homolog	Human	Bacillus coagulans DSM 1 = ATCC 7050	fig|1121088.10.peg.1525	BF29_1361		NP_001966.1	Homo sapiens	eno	Enolase (EC 4.2.1.11)				97	97	52	0
FBA	Essential Gene	PATRIC	Bacillus coagulans DSM 1 = ATCC 7050	fig|1121088.10.peg.2646	BF29_2417				rplD	LSU ribosomal protein L4p (L1e)	Essential gene, predicted using metabolic flux-balance analysis in LB media
BLASTP	Human Homolog	Human	Bacillus coagulans DSM 1 = ATCC 7050	fig|1121088.10.peg.3209	BF29_2912		NP_001180241.1	Homo sapiens		hypothetical protein				21	79	59	2e-27
BLASTP	Human Homolog	Human	Bacillus coagulans DSM 1 = ATCC 7050	fig|1121088.10.peg.166	BF29_149		NP_003840.2	Homo sapiens	sucD	Succinyl-CoA ligase [ADP-forming] alpha chain (EC 6.2.1.5)				85	97	61	0
FBA	Essential Gene	PATRIC	Bacillus coagulans DSM 1 = ATCC 7050	fig|1121088.10.peg.724	BF29_640				fmnP	hypothetical protein	Essential gene, predicted using metabolic flux-balance analysis in LB media
FBA	Essential Gene	PATRIC	Bacillus coagulans DSM 1 = ATCC 7050	fig|1121088.10.peg.1666	BF29_1509				ilvN	Acetolactate synthase small subunit (EC 2.2.1.6)	Essential gene, predicted using metabolic flux-balance analysis in LB media
FBA	Essential Gene	PATRIC	Bacillus coagulans DSM 1 = ATCC 7050	fig|1121088.10.peg.2322	BF29_2098				argS	Arginyl-tRNA synthetase (EC 6.1.1.19)	Essential gene, predicted using metabolic flux-balance analysis in LB media
BLAT	Transporter	TCDB	Bacillus coagulans DSM 1 = ATCC 7050	fig|1121088.10.peg.1708	BF29_1545		P97046	Lactococcus lactis		Lipid A export permease/ATP-binding protein MsbA	the atp-binding cassette (abc) superfamily.	3.A.1.117.1	17307855;8855237	28	84	83	6e-75
FBA	Essential Gene	PATRIC	Bacillus coagulans DSM 1 = ATCC 7050	fig|1121088.10.peg.3621	BF29_3252				tagF	CDP-glycerol:poly(glycerophosphate) glycerophosphotransferase (EC 2.7.8.12)	Essential gene, predicted using metabolic flux-balance analysis in LB media
FBA	Essential Gene	PATRIC	Bacillus coagulans DSM 1 = ATCC 7050	fig|1121088.10.peg.2666	BF29_2437				adk	Adenylate kinase (EC 2.7.4.3)	Essential gene, predicted using metabolic flux-balance analysis in LB media
FBA	Essential Gene	PATRIC	Bacillus coagulans DSM 1 = ATCC 7050	fig|1121088.10.peg.739	BF29_655				lysA	Diaminopimelate decarboxylase (EC 4.1.1.20)	Essential gene, predicted using metabolic flux-balance analysis in LB media
BLASTP	Human Homolog	Human	Bacillus coagulans DSM 1 = ATCC 7050	fig|1121088.10.peg.1867	BF29_1674		XP_006717934.1	Homo sapiens	rocD	Ornithine aminotransferase (EC 2.6.1.13)				90	97	50	0
K-mer Search	Antibiotic Resistance	PATRIC	Bacillus coagulans DSM 1 = ATCC 7050	fig|1121088.10.peg.2644	BF29_2415				rpsJ	SSU ribosomal protein S10p (S20e)		antibiotic target in susceptible species	26124155
FBA	Essential Gene	PATRIC	Bacillus coagulans DSM 1 = ATCC 7050	fig|1121088.10.peg.655	BF29_576				asnS	Asparaginyl-tRNA synthetase (EC 6.1.1.22)	Essential gene, predicted using metabolic flux-balance analysis in LB media
FBA	Essential Gene	PATRIC	Bacillus coagulans DSM 1 = ATCC 7050	fig|1121088.10.peg.2169	BF29_1943					Nicotinate phosphoribosyltransferase (EC 6.3.4.21)	Essential gene, predicted using metabolic flux-balance analysis in LB media
BLAT	Drug Target	DrugBank	Bacillus coagulans DSM 1 = ATCC 7050	fig|1121088.10.peg.1523	BF29_1359		Q06174	Geobacillus stearothermophilus	est	Carboxylesterase (EC 3.1.1.1)	Propyl Acetate	Drug target		100	98	80	1e-120
K-mer Search	Antibiotic Resistance	PATRIC	Bacillus coagulans DSM 1 = ATCC 7050	fig|1121088.10.peg.3280	BF29_2971					Glycerophosphoryl diester phosphodiesterase (EC 3.1.4.46)		protein altering cell wall charge conferring antibiotic resistance	21899450
BLASTP	Human Homolog	Human	Bacillus coagulans DSM 1 = ATCC 7050	fig|1121088.10.peg.2257	BF29_2040		NP_001677.2	Homo sapiens	atpD	ATP synthase beta chain (EC 3.6.3.14)				87	98	68	0
FBA	Essential Gene	PATRIC	Bacillus coagulans DSM 1 = ATCC 7050	fig|1121088.10.peg.1166	BF29_1034				coaE	Dephospho-CoA kinase (EC 2.7.1.24)	Essential gene, predicted using metabolic flux-balance analysis in LB media
BLAT	Drug Target	DrugBank	Bacillus coagulans DSM 1 = ATCC 7050	fig|1121088.10.peg.1172	BF29_1040		P39126	Bacillus subtilis (strain 168)	icd	Isocitrate dehydrogenase [NADP] (EC 1.1.1.42)	(R)-Propylene glycol;Citric Acid;S-1,2-Propanediol;S,S-(2-Hydroxyethyl)Thiocysteine'	Drug target		99	99	89	1e-222
FBA	Essential Gene	PATRIC	Bacillus coagulans DSM 1 = ATCC 7050	fig|1121088.10.peg.1314	BF29_1161				menH	2-succinyl-6-hydroxy-2,4-cyclohexadiene-1-carboxylate synthase (EC 4.2.99.20)	Essential gene, predicted using metabolic flux-balance analysis in LB media
FBA	Essential Gene	PATRIC	Bacillus coagulans DSM 1 = ATCC 7050	fig|1121088.10.peg.3393	BF29_3062				thrC	Threonine synthase (EC 4.2.3.1)	Essential gene, predicted using metabolic flux-balance analysis in LB media
FBA	Essential Gene	PATRIC	Bacillus coagulans DSM 1 = ATCC 7050	fig|1121088.10.peg.2637	BF29_2408				rpoB	DNA-directed RNA polymerase beta subunit (EC 2.7.7.6)	Essential gene, predicted using metabolic flux-balance analysis in LB media
FBA	Essential Gene	PATRIC	Bacillus coagulans DSM 1 = ATCC 7050	fig|1121088.10.peg.218	BF29_195					Phosphatidate cytidylyltransferase (EC 2.7.7.41)	Essential gene, predicted using metabolic flux-balance analysis in LB media
FBA	Essential Gene	PATRIC	Bacillus coagulans DSM 1 = ATCC 7050	fig|1121088.10.peg.691	BF29_610					Heptaprenyl diphosphate synthase component I (EC 2.5.1.30)	Essential gene, predicted using metabolic flux-balance analysis in LB media
FBA	Essential Gene	PATRIC	Bacillus coagulans DSM 1 = ATCC 7050	fig|1121088.10.peg.882	BF29_786				dgkA	hypothetical protein	Essential gene, predicted using metabolic flux-balance analysis in LB media
BLAT	Transporter	TCDB	Bacillus coagulans DSM 1 = ATCC 7050	fig|1121088.10.peg.2133	BF29_1910		Q45593	Bacillus subtilis		ABC transporter predicted to export YydF, ATP-binding protein	the atp-binding cassette (abc) superfamily.	3.A.1.133.1	15743949;17921301;9205843;9384377	100	100	82	5e-96
FBA	Essential Gene	PATRIC	Bacillus coagulans DSM 1 = ATCC 7050	fig|1121088.10.peg.1312	BF29_1159				menE	O-succinylbenzoic acid--CoA ligase (EC 6.2.1.26)	Essential gene, predicted using metabolic flux-balance analysis in LB media
BLAT	Drug Target	TTD	Bacillus coagulans DSM 1 = ATCC 7050	fig|1121088.10.peg.2643	BF29_2414		TTDI02058		tuf	Translation elongation factor Tu				98	98	85	1e-197
FBA	Essential Gene	PATRIC	Bacillus coagulans DSM 1 = ATCC 7050	fig|1121088.10.peg.694	BF29_612				hupA	DNA-binding protein HBsu	Essential gene, predicted using metabolic flux-balance analysis in LB media
FBA	Essential Gene	PATRIC	Bacillus coagulans DSM 1 = ATCC 7050	fig|1121088.10.peg.2668	BF29_2439				rpsM	SSU ribosomal protein S13p (S18e)	Essential gene, predicted using metabolic flux-balance analysis in LB media
FBA	Essential Gene	PATRIC	Bacillus coagulans DSM 1 = ATCC 7050	fig|1121088.10.peg.2292	BF29_2072				rpmE	LSU ribosomal protein L31p @ LSU ribosomal protein L31p, zinc-dependent	Essential gene, predicted using metabolic flux-balance analysis in LB media
BLASTP	Human Homolog	Human	Bacillus coagulans DSM 1 = ATCC 7050	fig|1121088.10.peg.3648	BF29_3273		NP_000134.2	Homo sapiens	fumC	Fumarate hydratase class II (EC 4.2.1.2)				89	98	59	0
FBA	Essential Gene	PATRIC	Bacillus coagulans DSM 1 = ATCC 7050	fig|1121088.10.peg.149	BF29_132				rnc	Ribonuclease III (EC 3.1.26.3)	Essential gene, predicted using metabolic flux-balance analysis in LB media
K-mer Search	Antibiotic Resistance	PATRIC	Bacillus coagulans DSM 1 = ATCC 7050	fig|1121088.10.peg.2527	BF29_2278				gyrB	DNA gyrase subunit B (EC 5.99.1.3)		antibiotic target in susceptible species	21693461;22279180;9293187
K-mer Search	Antibiotic Resistance	PATRIC	Bacillus coagulans DSM 1 = ATCC 7050	fig|1121088.10.peg.2511	BF29_2265				rsmG	16S rRNA (guanine(527)-N(7))-methyltransferase (EC 2.1.1.170)		gene conferring resistance via absence	17238915
FBA	Essential Gene	PATRIC	Bacillus coagulans DSM 1 = ATCC 7050	fig|1121088.10.peg.1002	BF29_892				aspS	Aspartyl-tRNA synthetase (EC 6.1.1.12)	Essential gene, predicted using metabolic flux-balance analysis in LB media
FBA	Essential Gene	PATRIC	Bacillus coagulans DSM 1 = ATCC 7050	fig|1121088.10.peg.2064	BF29_1840				gatC	hypothetical protein	Essential gene, predicted using metabolic flux-balance analysis in LB media
FBA	Essential Gene	PATRIC	Bacillus coagulans DSM 1 = ATCC 7050	fig|1121088.10.peg.2650	BF29_2421				rplV	LSU ribosomal protein L22p (L17e)	Essential gene, predicted using metabolic flux-balance analysis in LB media
FBA	Essential Gene	PATRIC	Bacillus coagulans DSM 1 = ATCC 7050	fig|1121088.10.peg.68	BF29_61				murD	UDP-N-acetylmuramoyl-L-alanine--D-glutamate ligase (EC 6.3.2.9)	Essential gene, predicted using metabolic flux-balance analysis in LB media
FBA	Essential Gene	PATRIC	Bacillus coagulans DSM 1 = ATCC 7050	fig|1121088.10.peg.2649	BF29_2420				rpsS	SSU ribosomal protein S19p (S15e)	Essential gene, predicted using metabolic flux-balance analysis in LB media
FBA	Essential Gene	PATRIC	Bacillus coagulans DSM 1 = ATCC 7050	fig|1121088.10.peg.2676	BF29_2447				rplM	LSU ribosomal protein L13p (L13Ae)	Essential gene, predicted using metabolic flux-balance analysis in LB media
FBA	Essential Gene	PATRIC	Bacillus coagulans DSM 1 = ATCC 7050	fig|1121088.10.peg.217	BF29_194				uppS	Undecaprenyl diphosphate synthase (EC 2.5.1.31)	Essential gene, predicted using metabolic flux-balance analysis in LB media
K-mer Search	Antibiotic Resistance	PATRIC	Bacillus coagulans DSM 1 = ATCC 7050	fig|1121088.10.peg.399	BF29_349					Two-component sensor histidine kinase BceS		regulator modulating expression of antibiotic resistance genes	25118291
BLASTP	Human Homolog	Human	Bacillus coagulans DSM 1 = ATCC 7050	fig|1121088.10.peg.1289	BF29_1140		XP_005269899.1	Homo sapiens	metK	S-adenosylmethionine synthetase (EC 2.5.1.6)				94	95	59	0
FBA	Essential Gene	PATRIC	Bacillus coagulans DSM 1 = ATCC 7050	fig|1121088.10.peg.212	BF29_190				rpsB	SSU ribosomal protein S2p (SAe)	Essential gene, predicted using metabolic flux-balance analysis in LB media
BLASTP	Human Homolog	Human	Bacillus coagulans DSM 1 = ATCC 7050	fig|1121088.10.peg.2680	BF29_2452		NP_005434.4	Homo sapiens	cysC	Adenylylsulfate kinase (EC 2.7.1.25)				32	97	52	0
BLASTP	Human Homolog	Human	Bacillus coagulans DSM 1 = ATCC 7050	fig|1121088.10.peg.1084	BF29_967		NP_006651.2	Homo sapiens	clpX	ATP-dependent Clp protease ATP-binding subunit ClpX				51	72	52	0
FBA	Essential Gene	PATRIC	Bacillus coagulans DSM 1 = ATCC 7050	fig|1121088.10.peg.2660	BF29_2431				rplF	LSU ribosomal protein L6p (L9e)	Essential gene, predicted using metabolic flux-balance analysis in LB media
FBA	Essential Gene	PATRIC	Bacillus coagulans DSM 1 = ATCC 7050	fig|1121088.10.peg.905	BF29_808				rpsT	SSU ribosomal protein S20p	Essential gene, predicted using metabolic flux-balance analysis in LB media
FBA	Essential Gene	PATRIC	Bacillus coagulans DSM 1 = ATCC 7050	fig|1121088.10.peg.260	BF29_234				pgsA	CDP-diacylglycerol--glycerol-3-phosphate 3-phosphatidyltransferase (EC 2.7.8.5)	Essential gene, predicted using metabolic flux-balance analysis in LB media
FBA	Essential Gene	PATRIC	Bacillus coagulans DSM 1 = ATCC 7050	fig|1121088.10.peg.890	BF29_794				rpsU	SSU ribosomal protein S21p	Essential gene, predicted using metabolic flux-balance analysis in LB media
FBA	Essential Gene	PATRIC	Bacillus coagulans DSM 1 = ATCC 7050	fig|1121088.10.peg.373	BF29_328				hisE	Phosphoribosyl-AMP cyclohydrolase (EC 3.5.4.19) / Phosphoribosyl-ATP pyrophosphatase (EC 3.6.1.31)	Essential gene, predicted using metabolic flux-balance analysis in LB media
FBA	Essential Gene	PATRIC	Bacillus coagulans DSM 1 = ATCC 7050	fig|1121088.10.peg.2534	BF29_2290				tmk	Thymidylate kinase (EC 2.7.4.9)	Essential gene, predicted using metabolic flux-balance analysis in LB media
FBA	Essential Gene	PATRIC	Bacillus coagulans DSM 1 = ATCC 7050	fig|1121088.10.peg.2596	BF29_2364				serS	Seryl-tRNA synthetase (EC 6.1.1.11)	Essential gene, predicted using metabolic flux-balance analysis in LB media
BLAT	Drug Target	DrugBank	Bacillus coagulans DSM 1 = ATCC 7050	fig|1121088.10.peg.3694			P25553	Escherichia coli (strain K12)		Aldehyde dehydrogenase A (EC 1.2.1.22) @ Glycolaldehyde dehydrogenase (EC 1.2.1.21)	Deoxycholic Acid	Drug target		10	84	85	2e-19
FBA	Essential Gene	PATRIC	Bacillus coagulans DSM 1 = ATCC 7050	fig|1121088.10.peg.1289	BF29_1140				metK	S-adenosylmethionine synthetase (EC 2.5.1.6)	Essential gene, predicted using metabolic flux-balance analysis in LB media
BLASTP	Human Homolog	Human	Bacillus coagulans DSM 1 = ATCC 7050	fig|1121088.10.peg.492	BF29_434		NP_004484.1	Homo sapiens		hypothetical protein				95	96	61	0
FBA	Essential Gene	PATRIC	Bacillus coagulans DSM 1 = ATCC 7050	fig|1121088.10.peg.2063	BF29_1839				gatA	Aspartyl-tRNA(Asn) amidotransferase subunit A (EC 6.3.5.6) @ Glutamyl-tRNA(Gln) amidotransferase subunit A (EC 6.3.5.7)	Essential gene, predicted using metabolic flux-balance analysis in LB media
BLASTP	Human Homolog	Human	Bacillus coagulans DSM 1 = ATCC 7050	fig|1121088.10.peg.490	BF29_432		XP_006723607.1	Homo sapiens		O-acetyl-ADP-ribose deacetylase				36	85	53	3e-47
FBA	Essential Gene	PATRIC	Bacillus coagulans DSM 1 = ATCC 7050	fig|1121088.10.peg.171	BF29_153				topA	DNA topoisomerase I (EC 5.99.1.2)	Essential gene, predicted using metabolic flux-balance analysis in LB media
FBA	Essential Gene	PATRIC	Bacillus coagulans DSM 1 = ATCC 7050	fig|1121088.10.peg.2484	BF29_2239					Two-component sensor kinase SA14-24	Essential gene, predicted using metabolic flux-balance analysis in LB media
BLASTP	Human Homolog	Human	Bacillus coagulans DSM 1 = ATCC 7050	fig|1121088.10.peg.1474	BF29_1320		NP_001743.1	Homo sapiens	katA	Catalase KatE (EC 1.11.1.6)				89	95	51	1e-164
FBA	Essential Gene	PATRIC	Bacillus coagulans DSM 1 = ATCC 7050	fig|1121088.10.peg.2661	BF29_2432				rplR	LSU ribosomal protein L18p (L5e)	Essential gene, predicted using metabolic flux-balance analysis in LB media
FBA	Essential Gene	PATRIC	Bacillus coagulans DSM 1 = ATCC 7050	fig|1121088.10.peg.3336	BF29_3017					N-acetylmannosaminyltransferase (EC 2.4.1.187)	Essential gene, predicted using metabolic flux-balance analysis in LB media
FBA	Essential Gene	PATRIC	Bacillus coagulans DSM 1 = ATCC 7050	fig|1121088.10.peg.557	BF29_489				mntH	Manganese transport protein MntH	Essential gene, predicted using metabolic flux-balance analysis in LB media
FBA	Essential Gene	PATRIC	Bacillus coagulans DSM 1 = ATCC 7050	fig|1121088.10.peg.2670	BF29_2441				rpoA	DNA-directed RNA polymerase alpha subunit (EC 2.7.7.6)	Essential gene, predicted using metabolic flux-balance analysis in LB media
BLASTP	Human Homolog	Human	Bacillus coagulans DSM 1 = ATCC 7050	fig|1121088.10.peg.2316	BF29_2093		NP_000008.1	Homo sapiens		Acyl-CoA dehydrogenase, short-chain specific (EC 1.3.8.1)				91	98	52	0
FBA	Essential Gene	PATRIC	Bacillus coagulans DSM 1 = ATCC 7050	fig|1121088.10.peg.685	BF29_604				aroB	3-dehydroquinate synthase (EC 4.2.3.4)	Essential gene, predicted using metabolic flux-balance analysis in LB media
FBA	Essential Gene	PATRIC	Bacillus coagulans DSM 1 = ATCC 7050	fig|1121088.10.peg.128	BF29_113				fmt	Methionyl-tRNA formyltransferase (EC 2.1.2.9)	Essential gene, predicted using metabolic flux-balance analysis in LB media
FBA	Essential Gene	PATRIC	Bacillus coagulans DSM 1 = ATCC 7050	fig|1121088.10.peg.232	BF29_209				rpsO	SSU ribosomal protein S15p (S13e)	Essential gene, predicted using metabolic flux-balance analysis in LB media
FBA	Essential Gene	PATRIC	Bacillus coagulans DSM 1 = ATCC 7050	fig|1121088.10.peg.873	BF29_778				sigA	RNA polymerase sigma factor RpoD	Essential gene, predicted using metabolic flux-balance analysis in LB media
FBA	Essential Gene	PATRIC	Bacillus coagulans DSM 1 = ATCC 7050	fig|1121088.10.peg.3765	BF29_3377					NAD kinase (EC 2.7.1.23)	Essential gene, predicted using metabolic flux-balance analysis in LB media
FBA	Essential Gene	PATRIC	Bacillus coagulans DSM 1 = ATCC 7050	fig|1121088.10.peg.2654	BF29_2425				rpsQ	SSU ribosomal protein S17p (S11e)	Essential gene, predicted using metabolic flux-balance analysis in LB media
FBA	Essential Gene	PATRIC	Bacillus coagulans DSM 1 = ATCC 7050	fig|1121088.10.peg.431	BF29_377				parC	DNA topoisomerase IV subunit A (EC 5.99.1.3)	Essential gene, predicted using metabolic flux-balance analysis in LB media
FBA	Essential Gene	PATRIC	Bacillus coagulans DSM 1 = ATCC 7050	fig|1121088.10.peg.901	BF29_804					Oxygen-independent coproporphyrinogen-III oxidase-like protein YggW	Essential gene, predicted using metabolic flux-balance analysis in LB media
FBA	Essential Gene	PATRIC	Bacillus coagulans DSM 1 = ATCC 7050	fig|1121088.10.peg.2663	BF29_2434				rpmD	LSU ribosomal protein L30p (L7e)	Essential gene, predicted using metabolic flux-balance analysis in LB media
BLASTP	Human Homolog	Human	Bacillus coagulans DSM 1 = ATCC 7050	fig|1121088.10.peg.2960	BF29_2706		NP_079523.3	Homo sapiens		Acyl-CoA dehydrogenase				37	95	60	0
FBA	Essential Gene	PATRIC	Bacillus coagulans DSM 1 = ATCC 7050	fig|1121088.10.peg.811	BF29_724				aroQ	3-dehydroquinate dehydratase II (EC 4.2.1.10)	Essential gene, predicted using metabolic flux-balance analysis in LB media
BLAT	Transporter	TCDB	Bacillus coagulans DSM 1 = ATCC 7050	fig|1121088.10.peg.528	BF29_467		P45946	Bacillus subtilis	arsB	Arsenical-resistance protein ACR3	the arsenical resistance-3 (acr3) family.	2.A.59.1.2	19383706;7489895;7704261;8969508;9384377;9537360	98	96	88	1e-176
FBA	Essential Gene	PATRIC	Bacillus coagulans DSM 1 = ATCC 7050	fig|1121088.10.peg.2638	BF29_2409				rpoC	DNA-directed RNA polymerase beta' subunit (EC 2.7.7.6)	Essential gene, predicted using metabolic flux-balance analysis in LB media
FBA	Essential Gene	PATRIC	Bacillus coagulans DSM 1 = ATCC 7050	fig|1121088.10.peg.1315	BF29_1162				menD	2-succinyl-5-enolpyruvyl-6-hydroxy-3-cyclohexene-1-carboxylic-acid synthase (EC 2.2.1.9)	Essential gene, predicted using metabolic flux-balance analysis in LB media
FBA	Essential Gene	PATRIC	Bacillus coagulans DSM 1 = ATCC 7050	fig|1121088.10.peg.2519	BF29_2271				dnaA	Chromosomal replication initiator protein DnaA	Essential gene, predicted using metabolic flux-balance analysis in LB media
FBA	Essential Gene	PATRIC	Bacillus coagulans DSM 1 = ATCC 7050	fig|1121088.10.peg.2677	BF29_2448				rpsI	SSU ribosomal protein S9p (S16e)	Essential gene, predicted using metabolic flux-balance analysis in LB media
FBA	Essential Gene	PATRIC	Bacillus coagulans DSM 1 = ATCC 7050	fig|1121088.10.peg.1161	BF29_1029				dnaI	Helicase loader DnaI	Essential gene, predicted using metabolic flux-balance analysis in LB media
K-mer Search	Antibiotic Resistance	PATRIC	Bacillus coagulans DSM 1 = ATCC 7050	fig|1121088.10.peg.784	BF29_699					Glycerophosphoryl diester phosphodiesterase (EC 3.1.4.46)		protein altering cell wall charge conferring antibiotic resistance	21899450
FBA	Essential Gene	PATRIC	Bacillus coagulans DSM 1 = ATCC 7050	fig|1121088.10.peg.3686	BF29_3308				hemE	Uroporphyrinogen III decarboxylase (EC 4.1.1.37)	Essential gene, predicted using metabolic flux-balance analysis in LB media
FBA	Essential Gene	PATRIC	Bacillus coagulans DSM 1 = ATCC 7050	fig|1121088.10.peg.224	BF29_201				nusA	Transcription termination protein NusA	Essential gene, predicted using metabolic flux-balance analysis in LB media
FBA	Essential Gene	PATRIC	Bacillus coagulans DSM 1 = ATCC 7050	fig|1121088.10.peg.1035	BF29_922				rpmA	LSU ribosomal protein L27p	Essential gene, predicted using metabolic flux-balance analysis in LB media
FBA	Essential Gene	PATRIC	Bacillus coagulans DSM 1 = ATCC 7050	fig|1121088.10.peg.906	BF29_809				holA	DNA polymerase III delta subunit (EC 2.7.7.7)	Essential gene, predicted using metabolic flux-balance analysis in LB media
K-mer Search	Antibiotic Resistance	PATRIC	Bacillus coagulans DSM 1 = ATCC 7050	fig|1121088.10.peg.309	BF29_269				dfrA	Dihydrofolate reductase (EC 1.5.1.3)		antibiotic target in susceptible species	20169085;25288078
FBA	Essential Gene	PATRIC	Bacillus coagulans DSM 1 = ATCC 7050	fig|1121088.10.peg.2537	BF29_2293				holB	DNA polymerase III delta prime subunit (EC 2.7.7.7)	Essential gene, predicted using metabolic flux-balance analysis in LB media
FBA	Essential Gene	PATRIC	Bacillus coagulans DSM 1 = ATCC 7050	fig|1121088.10.peg.309	BF29_269				dfrA	Dihydrofolate reductase (EC 1.5.1.3)	Essential gene, predicted using metabolic flux-balance analysis in LB media
K-mer Search	Antibiotic Resistance	PATRIC	Bacillus coagulans DSM 1 = ATCC 7050	fig|1121088.10.peg.2643	BF29_2414				tuf	Translation elongation factor Tu		antibiotic target in susceptible species	364475;9678602
BLAT	Transporter	TCDB	Bacillus coagulans DSM 1 = ATCC 7050	fig|1121088.10.peg.1552	BF29_1385		P26904	Bacillus subtilis		Dipeptide ABC transporter, permease protein DppC (TC 3.A.1.5.2)	the atp-binding cassette (abc) superfamily.	3.A.1.5.2	11069674;11473256;1766370;19383706;3145906;9384377	89	89	81	1e-135
FBA	Essential Gene	PATRIC	Bacillus coagulans DSM 1 = ATCC 7050	fig|1121088.10.peg.125	BF29_110				coaBC	Phosphopantothenoylcysteine decarboxylase (EC 4.1.1.36) / Phosphopantothenoylcysteine synthetase (EC 6.3.2.5)	Essential gene, predicted using metabolic flux-balance analysis in LB media
FBA	Essential Gene	PATRIC	Bacillus coagulans DSM 1 = ATCC 7050	fig|1121088.10.peg.3734	BF29_3349				fabH	3-oxoacyl-[acyl-carrier-protein] synthase, KASIII (EC 2.3.1.180)	Essential gene, predicted using metabolic flux-balance analysis in LB media
K-mer Search	Antibiotic Resistance	PATRIC	Bacillus coagulans DSM 1 = ATCC 7050	fig|1121088.10.peg.2227	BF29_2013					D-alanine--D-alanine ligase (EC 6.3.2.4)		antibiotic target in susceptible species	24303782;24033232
BLAT	Drug Target	DrugBank	Bacillus coagulans DSM 1 = ATCC 7050	fig|1121088.10.peg.2267	BF29_2049		Q5KUI2	Geobacillus kaustophilus (strain HTA426)		Serine hydroxymethyltransferase (EC 2.1.2.1)	(6R)-Folinic acid	Drug target		98	97	81	1e-195
FBA	Essential Gene	PATRIC	Bacillus coagulans DSM 1 = ATCC 7050	fig|1121088.10.peg.2941	BF29_2690					Acyl-phosphate:glycerol-3-phosphate O-acyltransferase PlsY (EC 2.3.1.n3)	Essential gene, predicted using metabolic flux-balance analysis in LB media
FBA	Essential Gene	PATRIC	Bacillus coagulans DSM 1 = ATCC 7050	fig|1121088.10.peg.959	BF29_853				alaS	Alanyl-tRNA synthetase (EC 6.1.1.7)	Essential gene, predicted using metabolic flux-balance analysis in LB media
K-mer Search	Antibiotic Resistance	PATRIC	Bacillus coagulans DSM 1 = ATCC 7050	fig|1121088.10.peg.398	BF29_348					Bacitracin export ATP-binding protein BceA		efflux pump conferring antibiotic resistance	25118291
K-mer Search	Antibiotic Resistance	PATRIC	Bacillus coagulans DSM 1 = ATCC 7050	fig|1121088.10.peg.2946	BF29_2695					Broad-specificity multidrug efflux pump YkkC		efflux pump conferring antibiotic resistance	10735877
BLASTP	Human Homolog	Human	Bacillus coagulans DSM 1 = ATCC 7050	fig|1121088.10.peg.1530	BF29_1366		NP_002037.2	Homo sapiens	gap	NAD-dependent glyceraldehyde-3-phosphate dehydrogenase (EC 1.2.1.12)				98	98	53	0
K-mer Search	Antibiotic Resistance	PATRIC	Bacillus coagulans DSM 1 = ATCC 7050	fig|1121088.10.peg.2640	BF29_2411				rpsL	SSU ribosomal protein S12p (S23e)		antibiotic target in susceptible species	7934937
FBA	Essential Gene	PATRIC	Bacillus coagulans DSM 1 = ATCC 7050	fig|1121088.10.peg.47	BF29_41				coaD	Phosphopantetheine adenylyltransferase (EC 2.7.7.3)	Essential gene, predicted using metabolic flux-balance analysis in LB media
FBA	Essential Gene	PATRIC	Bacillus coagulans DSM 1 = ATCC 7050	fig|1121088.10.peg.940	BF29_837				pssA	hypothetical protein	Essential gene, predicted using metabolic flux-balance analysis in LB media
BLASTP	Human Homolog	Human	Bacillus coagulans DSM 1 = ATCC 7050	fig|1121088.10.peg.852	BF29_761		NP_001019636.1	Homo sapiens	sodA	Superoxide dismutase [Mn] (EC 1.15.1.1)				88	99	52	0
FBA	Essential Gene	PATRIC	Bacillus coagulans DSM 1 = ATCC 7050	fig|1121088.10.peg.682	BF29_601					Prephenate dehydrogenase (EC 1.3.1.12)	Essential gene, predicted using metabolic flux-balance analysis in LB media
BLASTP	Human Homolog	Human	Bacillus coagulans DSM 1 = ATCC 7050	fig|1121088.10.peg.2175	BF29_1949		XP_005246575.1	Homo sapiens	groL	Heat shock protein 60 kDa family chaperone GroEL				91	96	52	0
FBA	Essential Gene	PATRIC	Bacillus coagulans DSM 1 = ATCC 7050	fig|1121088.10.peg.2559	BF29_2313				prs	Ribose-phosphate pyrophosphokinase (EC 2.7.6.1)	Essential gene, predicted using metabolic flux-balance analysis in LB media
FBA	Essential Gene	PATRIC	Bacillus coagulans DSM 1 = ATCC 7050	fig|1121088.10.peg.1067	BF29_953				valS	Valyl-tRNA synthetase (EC 6.1.1.9)	Essential gene, predicted using metabolic flux-balance analysis in LB media
FBA	Essential Gene	PATRIC	Bacillus coagulans DSM 1 = ATCC 7050	fig|1121088.10.peg.154	BF29_137				rpsP	SSU ribosomal protein S16p	Essential gene, predicted using metabolic flux-balance analysis in LB media
K-mer Search	Antibiotic Resistance	PATRIC	Bacillus coagulans DSM 1 = ATCC 7050	fig|1121088.10.peg.2253	BF29_2035				murA	UDP-N-acetylglucosamine 1-carboxyvinyltransferase (EC 2.5.1.7)		antibiotic target in susceptible species	8994972
FBA	Essential Gene	PATRIC	Bacillus coagulans DSM 1 = ATCC 7050	fig|1121088.10.peg.915	BF29_818				nadD	Nicotinate-nucleotide adenylyltransferase (EC 2.7.7.18)	Essential gene, predicted using metabolic flux-balance analysis in LB media
FBA	Essential Gene	PATRIC	Bacillus coagulans DSM 1 = ATCC 7050	fig|1121088.10.peg.686	BF29_605				aroC	Chorismate synthase (EC 4.2.3.5)	Essential gene, predicted using metabolic flux-balance analysis in LB media
BLASTP	Human Homolog	Human	Bacillus coagulans DSM 1 = ATCC 7050	fig|1121088.10.peg.568	BF29_499		NP_002622.2	Homo sapiens	gnd	6-phosphogluconate dehydrogenase, decarboxylating (EC 1.1.1.44)				97	99	57	0
FBA	Essential Gene	PATRIC	Bacillus coagulans DSM 1 = ATCC 7050	fig|1121088.10.peg.2648	BF29_2419				rplB	LSU ribosomal protein L2p (L8e)	Essential gene, predicted using metabolic flux-balance analysis in LB media
BLAT	Transporter	TCDB	Bacillus coagulans DSM 1 = ATCC 7050	fig|1121088.10.peg.674	BF29_595		P46912	Bacillus subtilis	qcrB	Menaquinone-cytochrome c reductase, cytochrome B subunit	the proton-translocating quinol:cytochrome c reductase (qcr) superfamily.	3.D.3.4.1	7592464;8760912;9384377;9535866	100	100	89	1e-119
FBA	Essential Gene	PATRIC	Bacillus coagulans DSM 1 = ATCC 7050	fig|1121088.10.peg.2105	BF29_1883				pbuG	Xanthine/uracil/thiamine/ascorbate permease family protein	Essential gene, predicted using metabolic flux-balance analysis in LB media
FBA	Essential Gene	PATRIC	Bacillus coagulans DSM 1 = ATCC 7050	fig|1121088.10.peg.2644	BF29_2415				rpsJ	SSU ribosomal protein S10p (S20e)	Essential gene, predicted using metabolic flux-balance analysis in LB media
BLASTP	Human Homolog	Human	Bacillus coagulans DSM 1 = ATCC 7050	fig|1121088.10.peg.2643	BF29_2414		NP_003312.3	Homo sapiens	tuf	Translation elongation factor Tu				86	99	58	0
FBA	Essential Gene	PATRIC	Bacillus coagulans DSM 1 = ATCC 7050	fig|1121088.10.peg.1316	BF29_1163					Isochorismate synthase (EC 5.4.4.2) @ Menaquinone-specific isochorismate synthase (EC 5.4.4.2)	Essential gene, predicted using metabolic flux-balance analysis in LB media
BLASTP	Human Homolog	Human	Bacillus coagulans DSM 1 = ATCC 7050	fig|1121088.10.peg.3693			NP_001193826.1	Homo sapiens		Aldehyde dehydrogenase A (EC 1.2.1.22) @ Glycolaldehyde dehydrogenase (EC 1.2.1.21)				9	80	54	1e-10
K-mer Search	Antibiotic Resistance	PATRIC	Bacillus coagulans DSM 1 = ATCC 7050	fig|1121088.10.peg.88	BF29_78				ileS	Isoleucyl-tRNA synthetase (EC 6.1.1.5)		antibiotic target in susceptible species	7929087
BLASTP	Human Homolog	Human	Bacillus coagulans DSM 1 = ATCC 7050	fig|1121088.10.peg.2082	BF29_1857		XP_006724051.1	Homo sapiens	purM	Phosphoribosylformylglycinamidine cyclo-ligase (EC 6.3.3.1)				32	95	50	0
K-mer Search	Antibiotic Resistance	PATRIC	Bacillus coagulans DSM 1 = ATCC 7050	fig|1121088.10.peg.397	BF29_347					Bacitracin export permease protein BceB		efflux pump conferring antibiotic resistance	25118291
FBA	Essential Gene	PATRIC	Bacillus coagulans DSM 1 = ATCC 7050	fig|1121088.10.peg.3561	BF29_3200					Gamma-glutamyltranspeptidase (EC 2.3.2.2) @ Glutathione hydrolase (EC 3.4.19.13)	Essential gene, predicted using metabolic flux-balance analysis in LB media
K-mer Search	Antibiotic Resistance	PATRIC	Bacillus coagulans DSM 1 = ATCC 7050	fig|1121088.10.peg.2642	BF29_2413				fusA	Translation elongation factor G		antibiotic target in susceptible species	17980694;19289529;19289529;17325218;19289529
FBA	Essential Gene	PATRIC	Bacillus coagulans DSM 1 = ATCC 7050	fig|1121088.10.peg.689	BF29_608				hepT	Heptaprenyl diphosphate synthase component II (EC 2.5.1.30)	Essential gene, predicted using metabolic flux-balance analysis in LB media
BLASTP	Human Homolog	Human	Bacillus coagulans DSM 1 = ATCC 7050	fig|1121088.10.peg.898	BF29_801		NP_004125.3	Homo sapiens	dnaK	Chaperone protein DnaK				91	97	54	0
BLAT	Drug Target	DrugBank	Bacillus coagulans DSM 1 = ATCC 7050	fig|1121088.10.peg.1530	BF29_1366		P00362	Geobacillus stearothermophilus	gap	NAD-dependent glyceraldehyde-3-phosphate dehydrogenase (EC 1.2.1.12)	Glyceraldehyde-3-Phosphate	Drug target		100	100	84	1e-161
FBA	Essential Gene	PATRIC	Bacillus coagulans DSM 1 = ATCC 7050	fig|1121088.10.peg.2664	BF29_2435				rplO	LSU ribosomal protein L15p (L27Ae)	Essential gene, predicted using metabolic flux-balance analysis in LB media
BLASTP	Human Homolog	Human	Bacillus coagulans DSM 1 = ATCC 7050	fig|1121088.10.peg.420	BF29_367		XP_006716840.1	Homo sapiens	acnA	Aconitate hydratase (EC 4.2.1.3)				96	96	55	0
FBA	Essential Gene	PATRIC	Bacillus coagulans DSM 1 = ATCC 7050	fig|1121088.10.peg.3346	BF29_3024				tagH	Teichoic acid export ATP-binding protein TagH (EC 3.6.3.40)	Essential gene, predicted using metabolic flux-balance analysis in LB media
BLASTP	Human Homolog	Human	Bacillus coagulans DSM 1 = ATCC 7050	fig|1121088.10.peg.2909	BF29_2666		NP_005882.2	Homo sapiens	thlA	3-ketoacyl-CoA thiolase (EC 2.3.1.16) @ Acetyl-CoA acetyltransferase (EC 2.3.1.9)				97	98	53	0
FBA	Essential Gene	PATRIC	Bacillus coagulans DSM 1 = ATCC 7050	fig|1121088.10.peg.2656	BF29_2427				rplX	LSU ribosomal protein L24p (L26e)	Essential gene, predicted using metabolic flux-balance analysis in LB media
FBA	Essential Gene	PATRIC	Bacillus coagulans DSM 1 = ATCC 7050	fig|1121088.10.peg.2622	BF29_2394				cysS	Cysteinyl-tRNA synthetase (EC 6.1.1.16)	Essential gene, predicted using metabolic flux-balance analysis in LB media
FBA	Essential Gene	PATRIC	Bacillus coagulans DSM 1 = ATCC 7050	fig|1121088.10.peg.2653	BF29_2424				rpmC	LSU ribosomal protein L29p (L35e)	Essential gene, predicted using metabolic flux-balance analysis in LB media
FBA	Essential Gene	PATRIC	Bacillus coagulans DSM 1 = ATCC 7050	fig|1121088.10.peg.2588	BF29_2341				lysS	Lysyl-tRNA synthetase (class II) (EC 6.1.1.6)	Essential gene, predicted using metabolic flux-balance analysis in LB media
FBA	Essential Gene	PATRIC	Bacillus coagulans DSM 1 = ATCC 7050	fig|1121088.10.peg.3622	BF29_3253					Teichoic acid translocation permease protein TagG	Essential gene, predicted using metabolic flux-balance analysis in LB media
K-mer Search	Antibiotic Resistance	PATRIC	Bacillus coagulans DSM 1 = ATCC 7050	fig|1121088.10.peg.3426	BF29_3088				yokD	weak similarity to aminoglycoside N(3)-acetyltransferase		antibiotic inactivation enzyme	;
BLAT	Transporter	TCDB	Bacillus coagulans DSM 1 = ATCC 7050	fig|1121088.10.peg.1046	BF29_932		Q01465	Bacillus subtilis (strain 168)		Rod shape-determining protein MreB	the cell shape-determining mrebcd (mrebcd) family.	9.B.157.1.1		97	97	83	1e-153
FBA	Essential Gene	PATRIC	Bacillus coagulans DSM 1 = ATCC 7050	fig|1121088.10.peg.2088	BF29_1863				purB	Adenylosuccinate lyase (EC 4.3.2.2) @ SAICAR lyase (EC 4.3.2.2)	Essential gene, predicted using metabolic flux-balance analysis in LB media
FBA	Essential Gene	PATRIC	Bacillus coagulans DSM 1 = ATCC 7050	fig|1121088.10.peg.792	BF29_706					(2E,6E)-farnesyl diphosphate synthase (EC 2.5.1.10)	Essential gene, predicted using metabolic flux-balance analysis in LB media
FBA	Essential Gene	PATRIC	Bacillus coagulans DSM 1 = ATCC 7050	fig|1121088.10.peg.2528	BF29_2279				gyrA	DNA gyrase subunit A (EC 5.99.1.3)	Essential gene, predicted using metabolic flux-balance analysis in LB media
FBA	Essential Gene	PATRIC	Bacillus coagulans DSM 1 = ATCC 7050	fig|1121088.10.peg.736	BF29_652				scpA	Segregation and condensation protein A	Essential gene, predicted using metabolic flux-balance analysis in LB media
FBA	Essential Gene	PATRIC	Bacillus coagulans DSM 1 = ATCC 7050	fig|1121088.10.peg.3254	BF29_2951				nadA	Quinolinate synthetase (EC 2.5.1.72)	Essential gene, predicted using metabolic flux-balance analysis in LB media
FBA	Essential Gene	PATRIC	Bacillus coagulans DSM 1 = ATCC 7050	fig|1121088.10.peg.231	BF29_208				ribF	FMN adenylyltransferase (EC 2.7.7.2) / Riboflavin kinase (EC 2.7.1.26)	Essential gene, predicted using metabolic flux-balance analysis in LB media
FBA	Essential Gene	PATRIC	Bacillus coagulans DSM 1 = ATCC 7050	fig|1121088.10.peg.2062	BF29_1838				gatB	Aspartyl-tRNA(Asn) amidotransferase subunit B (EC 6.3.5.6) @ Glutamyl-tRNA(Gln) amidotransferase subunit B (EC 6.3.5.7)	Essential gene, predicted using metabolic flux-balance analysis in LB media
FBA	Essential Gene	PATRIC	Bacillus coagulans DSM 1 = ATCC 7050	fig|1121088.10.peg.2485	BF29_2240				yycF	Two-component response regulator SA14-24	Essential gene, predicted using metabolic flux-balance analysis in LB media
BLASTP	Human Homolog	Human	Bacillus coagulans DSM 1 = ATCC 7050	fig|1121088.10.peg.3641	BF29_3268		NP_006003.1	Homo sapiens	clpP	ATP-dependent Clp protease proteolytic subunit ClpP (EC 3.4.21.92)				68	96	56	0
FBA	Essential Gene	PATRIC	Bacillus coagulans DSM 1 = ATCC 7050	fig|1121088.10.peg.684	BF29_603				aroH	Chorismate mutase II (EC 5.4.99.5)	Essential gene, predicted using metabolic flux-balance analysis in LB media
BLASTP	Human Homolog	Human	Bacillus coagulans DSM 1 = ATCC 7050	fig|1121088.10.peg.344	BF29_302		NP_001924.2	Homo sapiens	sucB	Dihydrolipoamide succinyltransferase component (E2) of 2-oxoglutarate dehydrogenase complex (EC 2.3.1.61)				55	59	53	0
FBA	Essential Gene	PATRIC	Bacillus coagulans DSM 1 = ATCC 7050	fig|1121088.10.peg.917	BF29_820				aroE	Shikimate 5-dehydrogenase I alpha (EC 1.1.1.25)	Essential gene, predicted using metabolic flux-balance analysis in LB media
BLASTP	Human Homolog	Human	Bacillus coagulans DSM 1 = ATCC 7050	fig|1121088.10.peg.2348	BF29_2119		NP_550433.1	Homo sapiens	ung	Uracil-DNA glycosylase, family 1 (EC 3.2.2.27)				69	95	52	0
FBA	Essential Gene	PATRIC	Bacillus coagulans DSM 1 = ATCC 7050	fig|1121088.10.peg.150	BF29_133				smc	Chromosome partition protein smc	Essential gene, predicted using metabolic flux-balance analysis in LB media
FBA	Essential Gene	PATRIC	Bacillus coagulans DSM 1 = ATCC 7050	fig|1121088.10.peg.2991	BF29_2736				cobA	Uroporphyrinogen-III methyltransferase (EC 2.1.1.107)	Essential gene, predicted using metabolic flux-balance analysis in LB media
FBA	Essential Gene	PATRIC	Bacillus coagulans DSM 1 = ATCC 7050	fig|1121088.10.peg.2517						LSU ribosomal protein L34p	Essential gene, predicted using metabolic flux-balance analysis in LB media
BLASTP	Human Homolog	Human	Bacillus coagulans DSM 1 = ATCC 7050	fig|1121088.10.peg.1392	BF29_1250		XP_005248532.1	Homo sapiens		Peptidyl-prolyl cis-trans isomerase (EC 5.2.1.8)				47	89	53	0
FBA	Essential Gene	PATRIC	Bacillus coagulans DSM 1 = ATCC 7050	fig|1121088.10.peg.2635	BF29_2406				rplL	LSU ribosomal protein L7p/L12p (P1/P2)	Essential gene, predicted using metabolic flux-balance analysis in LB media
FBA	Essential Gene	PATRIC	Bacillus coagulans DSM 1 = ATCC 7050	fig|1121088.10.peg.2496	BF29_2251				rpsF	SSU ribosomal protein S6p	Essential gene, predicted using metabolic flux-balance analysis in LB media
K-mer Search	Antibiotic Resistance	PATRIC	Bacillus coagulans DSM 1 = ATCC 7050	fig|1121088.10.peg.2528	BF29_2279				gyrA	DNA gyrase subunit A (EC 5.99.1.3)		antibiotic target in susceptible species	9293187
BLASTP	Human Homolog	Human	Bacillus coagulans DSM 1 = ATCC 7050	fig|1121088.10.peg.818	BF29_731		XP_006713186.1	Homo sapiens		hypothetical protein				30	57	53	2e-17
BLAT	Virulence Factor	PATRIC_VF	Bacillus coagulans DSM 1 = ATCC 7050	fig|1121088.10.peg.2487	BF29_2244		lmo0055	Listeria monocytogenes EGD-e	purA	Adenylosuccinate synthetase (EC 6.3.4.4)		Intracellular survival and replication	20955543	99	99	83	1e-213
FBA	Essential Gene	PATRIC	Bacillus coagulans DSM 1 = ATCC 7050	fig|1121088.10.peg.2647	BF29_2418				rplW	LSU ribosomal protein L23p (L23Ae)	Essential gene, predicted using metabolic flux-balance analysis in LB media
FBA	Essential Gene	PATRIC	Bacillus coagulans DSM 1 = ATCC 7050	fig|1121088.10.peg.67	BF29_60				mraY	Phospho-N-acetylmuramoyl-pentapeptide-transferase (EC 2.7.8.13)	Essential gene, predicted using metabolic flux-balance analysis in LB media
K-mer Search	Antibiotic Resistance	PATRIC	Bacillus coagulans DSM 1 = ATCC 7050	fig|1121088.10.peg.3768	BF29_3380				fabI	Enoyl-[acyl-carrier-protein] reductase [NADH] (EC 1.3.1.9)		antibiotic target in susceptible species	18193820;10869170;8284673
FBA	Essential Gene	PATRIC	Bacillus coagulans DSM 1 = ATCC 7050	fig|1121088.10.peg.1973	BF29_1766				deoD	Purine nucleoside phosphorylase (EC 2.4.2.1)	Essential gene, predicted using metabolic flux-balance analysis in LB media
FBA	Essential Gene	PATRIC	Bacillus coagulans DSM 1 = ATCC 7050	fig|1121088.10.peg.2651	BF29_2422				rpsC	SSU ribosomal protein S3p (S3e)	Essential gene, predicted using metabolic flux-balance analysis in LB media
K-mer Search	Antibiotic Resistance	PATRIC	Bacillus coagulans DSM 1 = ATCC 7050	fig|1121088.10.peg.1627	BF29_1474				fabL	Enoyl-[acyl-carrier-protein] reductase [NADPH] (EC 1.3.1.104), FabL		antibiotic target replacement protein	21185310
FBA	Essential Gene	PATRIC	Bacillus coagulans DSM 1 = ATCC 7050	fig|1121088.10.peg.54	BF29_48				rpmF	LSU ribosomal protein L32p @ LSU ribosomal protein L32p, zinc-dependent	Essential gene, predicted using metabolic flux-balance analysis in LB media
FBA	Essential Gene	PATRIC	Bacillus coagulans DSM 1 = ATCC 7050	fig|1121088.10.peg.1741	BF29_1573					Cystathionine beta-synthase (EC 4.2.1.22)	Essential gene, predicted using metabolic flux-balance analysis in LB media
FBA	Essential Gene	PATRIC	Bacillus coagulans DSM 1 = ATCC 7050	fig|1121088.10.peg.70	BF29_63				murG	UDP-N-acetylglucosamine--N-acetylmuramyl-(pentapeptide) pyrophosphoryl-undecaprenol N-acetylglucosamine transferase (EC 2.4.1.227)	Essential gene, predicted using metabolic flux-balance analysis in LB media
FBA	Essential Gene	PATRIC	Bacillus coagulans DSM 1 = ATCC 7050	fig|1121088.10.peg.3015	BF29_2755					Phosphomevalonate kinase (EC 2.7.4.2)	Essential gene, predicted using metabolic flux-balance analysis in LB media
FBA	Essential Gene	PATRIC	Bacillus coagulans DSM 1 = ATCC 7050	fig|1121088.10.peg.240	BF29_216				asd	Aspartate-semialdehyde dehydrogenase (EC 1.2.1.11)	Essential gene, predicted using metabolic flux-balance analysis in LB media
FBA	Essential Gene	PATRIC	Bacillus coagulans DSM 1 = ATCC 7050	fig|1121088.10.peg.1182	BF29_1049				dnaE	DNA polymerase III alpha subunit (EC 2.7.7.7)	Essential gene, predicted using metabolic flux-balance analysis in LB media
BLAT	Transporter	TCDB	Bacillus coagulans DSM 1 = ATCC 7050	fig|1121088.10.peg.1110	BF29_987		Q65GF5	Bacillus licheniformis (strain DSM 13 / ATCC 14580)		Succinate dehydrogenase iron-sulfur protein (EC 1.3.5.1)	the prokaryotic succinate dehydrogenase (sdh) family.	3.D.10.1.1	15383718;15461803	99	99	82	1e-128
BLAT	Virulence Factor	Victors	Bacillus coagulans DSM 1 = ATCC 7050	fig|1121088.10.peg.178	BF29_157		227813264	Bacillus anthracis str. CDC 684	codY	GTP-sensing transcriptional pleiotropic repressor CodY			19651859	98	98	82	1e-114
BLASTP	Human Homolog	Human	Bacillus coagulans DSM 1 = ATCC 7050	fig|1121088.10.peg.1967	BF29_1761		NP_001776.1	Homo sapiens	cdd	Cytidine deaminase (EC 3.5.4.5)				87	98	51	2e-37
BLASTP	Human Homolog	Human	Bacillus coagulans DSM 1 = ATCC 7050	fig|1121088.10.peg.308	BF29_268		NP_001062.1	Homo sapiens	thyA	Thymidylate synthase (EC 2.1.1.45)				90	98	55	0
BLAT	Transporter	TCDB	Bacillus coagulans DSM 1 = ATCC 7050	fig|1121088.10.peg.1111	BF29_988		Q65GF4	Bacillus licheniformis (strain DSM 13 / ATCC 14580)	sdhA	Succinate dehydrogenase flavoprotein subunit (EC 1.3.5.1)	the prokaryotic succinate dehydrogenase (sdh) family.	3.D.10.1.1	15383718;15461803	93	94	85	1e-288
BLAT	Transporter	TCDB	Bacillus coagulans DSM 1 = ATCC 7050	fig|1121088.10.peg.898	BF29_801		G4NXA5	Bacillus subtilis subsp. spizizenii TU-B-10	dnaK	Chaperone protein DnaK	the cation channel-forming heat shock protein-70 (hsp70) family.	1.A.33.1.4		95	95	85	1e-287
FBA	Essential Gene	PATRIC	Bacillus coagulans DSM 1 = ATCC 7050	fig|1121088.10.peg.2491	BF29_2246				rplI	LSU ribosomal protein L9p	Essential gene, predicted using metabolic flux-balance analysis in LB media
K-mer Search	Antibiotic Resistance	PATRIC	Bacillus coagulans DSM 1 = ATCC 7050	fig|1121088.10.peg.260	BF29_234				pgsA	CDP-diacylglycerol--glycerol-3-phosphate 3-phosphatidyltransferase (EC 2.7.8.5)		protein altering cell wall charge conferring antibiotic resistance	22238576
FBA	Essential Gene	PATRIC	Bacillus coagulans DSM 1 = ATCC 7050	fig|1121088.10.peg.2671	BF29_2442				rplQ	LSU ribosomal protein L17p	Essential gene, predicted using metabolic flux-balance analysis in LB media
K-mer Search	Antibiotic Resistance	PATRIC	Bacillus coagulans DSM 1 = ATCC 7050	fig|1121088.10.peg.2585	BF29_2336				folP	Dihydropteroate synthase (EC 2.5.1.15)		antibiotic target in susceptible species	15673783
BLAT	Virulence Factor	Victors	Bacillus coagulans DSM 1 = ATCC 7050	fig|1121088.10.peg.1084	BF29_967		227817253	Bacillus anthracis str. CDC 684	clpX	ATP-dependent Clp protease ATP-binding subunit ClpX			20375606	98	97	85	1e-202
FBA	Essential Gene	PATRIC	Bacillus coagulans DSM 1 = ATCC 7050	fig|1121088.10.peg.2580	BF29_2331				hpt	Hypoxanthine-guanine phosphoribosyltransferase (EC 2.4.2.8)	Essential gene, predicted using metabolic flux-balance analysis in LB media
FBA	Essential Gene	PATRIC	Bacillus coagulans DSM 1 = ATCC 7050	fig|1121088.10.peg.2494	BF29_2249				rpsR	SSU ribosomal protein S18p @ SSU ribosomal protein S18p, zinc-independent	Essential gene, predicted using metabolic flux-balance analysis in LB media
FBA	Essential Gene	PATRIC	Bacillus coagulans DSM 1 = ATCC 7050	fig|1121088.10.peg.830	BF29_741					Shikimate kinase I (EC 2.7.1.71)	Essential gene, predicted using metabolic flux-balance analysis in LB media
FBA	Essential Gene	PATRIC	Bacillus coagulans DSM 1 = ATCC 7050	fig|1121088.10.peg.2487	BF29_2244				purA	Adenylosuccinate synthetase (EC 6.3.4.4)	Essential gene, predicted using metabolic flux-balance analysis in LB media
FBA	Essential Gene	PATRIC	Bacillus coagulans DSM 1 = ATCC 7050	fig|1121088.10.peg.2634	BF29_2405				rplJ	LSU ribosomal protein L10p (P0)	Essential gene, predicted using metabolic flux-balance analysis in LB media
FBA	Essential Gene	PATRIC	Bacillus coagulans DSM 1 = ATCC 7050	fig|1121088.10.peg.874	BF29_779				dnaG	DNA primase DnaG	Essential gene, predicted using metabolic flux-balance analysis in LB media
FBA	Essential Gene	PATRIC	Bacillus coagulans DSM 1 = ATCC 7050	fig|1121088.10.peg.2604	BF29_2372				dnaX	DNA polymerase III subunits gamma and tau (EC 2.7.7.7)	Essential gene, predicted using metabolic flux-balance analysis in LB media
FBA	Essential Gene	PATRIC	Bacillus coagulans DSM 1 = ATCC 7050	fig|1121088.10.peg.2645	BF29_2416				rplC	LSU ribosomal protein L3p (L3e)	Essential gene, predicted using metabolic flux-balance analysis in LB media
FBA	Essential Gene	PATRIC	Bacillus coagulans DSM 1 = ATCC 7050	fig|1121088.10.peg.3480	BF29_3138				galE	UDP-glucose 4-epimerase (EC 5.1.3.2)	Essential gene, predicted using metabolic flux-balance analysis in LB media
FBA	Essential Gene	PATRIC	Bacillus coagulans DSM 1 = ATCC 7050	fig|1121088.10.peg.1031	BF29_918					Prephenate dehydratase (EC 4.2.1.51)	Essential gene, predicted using metabolic flux-balance analysis in LB media
BLAT	Drug Target	DrugBank	Bacillus coagulans DSM 1 = ATCC 7050	fig|1121088.10.peg.2204	BF29_1992		P96622	Bacillus subtilis (strain 168)	ndoA	Programmed cell death toxin YdcE	2-(2-{2-[2-(2-Methoxy-Ethoxy)-Ethoxy]-Ethoxy}-Ethoxy)-Ethanol	Drug target		97	97	91	8e-53
K-mer Search	Antibiotic Resistance	PATRIC	Bacillus coagulans DSM 1 = ATCC 7050	fig|1121088.10.peg.3735	BF29_3350				fabF	3-oxoacyl-[acyl-carrier-protein] synthase, KASII (EC 2.3.1.179)		antibiotic target in susceptible species	10428945
BLASTP	Human Homolog	Human	Bacillus coagulans DSM 1 = ATCC 7050	fig|1121088.10.peg.688	BF29_607		NP_002504.2	Homo sapiens	ndk	Nucleoside diphosphate kinase (EC 2.7.4.6)				86	99	59	0
BLAT	Transporter	TCDB	Bacillus coagulans DSM 1 = ATCC 7050	fig|1121088.10.peg.2134	BF29_1911		Q45592	Bacillus subtilis		hypothetical protein	the atp-binding cassette (abc) superfamily.	3.A.1.133.1	15743949;17921301;9205843;9384377	85	85	80	1e-92
FBA	Essential Gene	PATRIC	Bacillus coagulans DSM 1 = ATCC 7050	fig|1121088.10.peg.3744	BF29_3358				trpS	Tryptophanyl-tRNA synthetase (EC 6.1.1.2)	Essential gene, predicted using metabolic flux-balance analysis in LB media
FBA	Essential Gene	PATRIC	Bacillus coagulans DSM 1 = ATCC 7050	fig|1121088.10.peg.159	BF29_142				rplS	LSU ribosomal protein L19p	Essential gene, predicted using metabolic flux-balance analysis in LB media
FBA	Essential Gene	PATRIC	Bacillus coagulans DSM 1 = ATCC 7050	fig|1121088.10.peg.1965	BF29_1760				metE	5-methyltetrahydropteroyltriglutamate--homocysteine methyltransferase (EC 2.1.1.14)	Essential gene, predicted using metabolic flux-balance analysis in LB media
K-mer Search	Antibiotic Resistance	PATRIC	Bacillus coagulans DSM 1 = ATCC 7050	fig|1121088.10.peg.2293	BF29_2073				rho	Transcription termination factor Rho		antibiotic target in susceptible species	8466900
FBA	Essential Gene	PATRIC	Bacillus coagulans DSM 1 = ATCC 7050	fig|1121088.10.peg.123	BF29_108				gmk	Guanylate kinase (EC 2.7.4.8)	Essential gene, predicted using metabolic flux-balance analysis in LB media
FBA	Essential Gene	PATRIC	Bacillus coagulans DSM 1 = ATCC 7050	fig|1121088.10.peg.2655	BF29_2426				rplN	LSU ribosomal protein L14p (L23e)	Essential gene, predicted using metabolic flux-balance analysis in LB media
FBA	Essential Gene	PATRIC	Bacillus coagulans DSM 1 = ATCC 7050	fig|1121088.10.peg.2544	BF29_2300				metG	Methionyl-tRNA synthetase (EC 6.1.1.10)	Essential gene, predicted using metabolic flux-balance analysis in LB media
BLAT	Virulence Factor	PATRIC_VF	Bacillus coagulans DSM 1 = ATCC 7050	fig|1121088.10.peg.2088	BF29_1863		LMOh7858_1898	Listeria monocytogenes serotype 4b str. H7858	purB	Adenylosuccinate lyase (EC 4.3.2.2) @ SAICAR lyase (EC 4.3.2.2)		Virulence	22506772	91	90	83	1e-194
FBA	Essential Gene	PATRIC	Bacillus coagulans DSM 1 = ATCC 7050	fig|1121088.10.peg.1155	BF29_1024				rpmI	LSU ribosomal protein L35p	Essential gene, predicted using metabolic flux-balance analysis in LB media
FBA	Essential Gene	PATRIC	Bacillus coagulans DSM 1 = ATCC 7050	fig|1121088.10.peg.1244	BF29_1102				aroA	Chorismate mutase I (EC 5.4.99.5) / 2-keto-3-deoxy-D-arabino-heptulosonate-7-phosphate synthase I beta (EC 2.5.1.54)	Essential gene, predicted using metabolic flux-balance analysis in LB media
FBA	Essential Gene	PATRIC	Bacillus coagulans DSM 1 = ATCC 7050	fig|1121088.10.peg.2582	BF29_2333				coaX	Pantothenate kinase type III, CoaX-like (EC 2.7.1.33)	Essential gene, predicted using metabolic flux-balance analysis in LB media
FBA	Essential Gene	PATRIC	Bacillus coagulans DSM 1 = ATCC 7050	fig|1121088.10.peg.3676	BF29_3300					Substrate-specific component TrpP of tryptophan ECF transporter	Essential gene, predicted using metabolic flux-balance analysis in LB media
BLASTP	Human Homolog	Human	Bacillus coagulans DSM 1 = ATCC 7050	fig|1121088.10.peg.2259	BF29_2042		NP_001001937.1	Homo sapiens	atpA	ATP synthase alpha chain (EC 3.6.3.14)				91	98	58	0
K-mer Search	Antibiotic Resistance	PATRIC	Bacillus coagulans DSM 1 = ATCC 7050	fig|1121088.10.peg.2206	BF29_1994				alr	Alanine racemase (EC 5.1.1.1)		antibiotic target in susceptible species	19748470;24303782
FBA	Essential Gene	PATRIC	Bacillus coagulans DSM 1 = ATCC 7050	fig|1121088.10.peg.1159	BF29_1027				thrS	Threonyl-tRNA synthetase (EC 6.1.1.3)	Essential gene, predicted using metabolic flux-balance analysis in LB media
FBA	Essential Gene	PATRIC	Bacillus coagulans DSM 1 = ATCC 7050	fig|1121088.10.peg.2527	BF29_2278				gyrB	DNA gyrase subunit B (EC 5.99.1.3)	Essential gene, predicted using metabolic flux-balance analysis in LB media
FBA	Essential Gene	PATRIC	Bacillus coagulans DSM 1 = ATCC 7050	fig|1121088.10.peg.1248	BF29_1105				murC	UDP-N-acetylmuramate--L-alanine ligase (EC 6.3.2.8)	Essential gene, predicted using metabolic flux-balance analysis in LB media
FBA	Essential Gene	PATRIC	Bacillus coagulans DSM 1 = ATCC 7050	fig|1121088.10.peg.1133	BF29_1006				pheT	Phenylalanyl-tRNA synthetase beta chain (EC 6.1.1.20)	Essential gene, predicted using metabolic flux-balance analysis in LB media
FBA	Essential Gene	PATRIC	Bacillus coagulans DSM 1 = ATCC 7050	fig|1121088.10.peg.776	BF29_691					Dihydrolipoamide acyltransferase component of branched-chain alpha-keto acid dehydrogenase complex (EC 2.3.1.168)	Essential gene, predicted using metabolic flux-balance analysis in LB media
BLAT	Transporter	TCDB	Bacillus coagulans DSM 1 = ATCC 7050	fig|1121088.10.peg.806	BF29_719		P49780	Bacillus subtilis	spoIIIAC	Stage III sporulation protein AC	the multicomponent putative spoiiiae exporter (spoiiia-e) family.	9.B.70.1.1	1766372;19383706;8969508;9384377	98	100	83	8e-26
FBA	Essential Gene	PATRIC	Bacillus coagulans DSM 1 = ATCC 7050	fig|1121088.10.peg.778	BF29_693				bfmBAA	Branched-chain alpha-keto acid dehydrogenase, E1 component, alpha subunit (EC 1.2.4.4)	Essential gene, predicted using metabolic flux-balance analysis in LB media
FBA	Essential Gene	PATRIC	Bacillus coagulans DSM 1 = ATCC 7050	fig|1121088.10.peg.2168	BF29_1942				nadE	NAD synthetase (EC 6.3.1.5)	Essential gene, predicted using metabolic flux-balance analysis in LB media
FBA	Essential Gene	PATRIC	Bacillus coagulans DSM 1 = ATCC 7050	fig|1121088.10.peg.1003	BF29_893				hisS	Histidyl-tRNA synthetase (EC 6.1.1.21)	Essential gene, predicted using metabolic flux-balance analysis in LB media
BLASTP	Human Homolog	Human	Bacillus coagulans DSM 1 = ATCC 7050	fig|1121088.10.peg.345	BF29_303		NP_000681.2	Homo sapiens		Aldehyde dehydrogenase (EC 1.2.1.3)				92	95	55	0
FBA	Essential Gene	PATRIC	Bacillus coagulans DSM 1 = ATCC 7050	fig|1121088.10.peg.2579	BF29_2330				tilS	tRNA(Ile)-lysidine synthetase (EC 6.3.4.19)	Essential gene, predicted using metabolic flux-balance analysis in LB media
FBA	Essential Gene	PATRIC	Bacillus coagulans DSM 1 = ATCC 7050	fig|1121088.10.peg.2516	BF29_2270				rnpA	Ribonuclease P protein component (EC 3.1.26.5)	Essential gene, predicted using metabolic flux-balance analysis in LB media
K-mer Search	Antibiotic Resistance	PATRIC	Bacillus coagulans H-1	fig|1236905.3.peg.3022		VBIBacCoa259451_3022				CDP-diacylglycerol--glycerol-3-phosphate 3-phosphatidyltransferase (EC 2.7.8.5)		protein altering cell wall charge conferring antibiotic resistance	22238576
K-mer Search	Antibiotic Resistance	PATRIC	Bacillus coagulans H-1	fig|1236905.3.peg.2084		VBIBacCoa259451_2084				weak similarity to aminoglycoside N(3)-acetyltransferase		antibiotic inactivation enzyme	;
K-mer Search	Antibiotic Resistance	PATRIC	Bacillus coagulans H-1	fig|1236905.3.peg.954		VBIBacCoa259451_0954				UDP-N-acetylglucosamine 1-carboxyvinyltransferase (EC 2.5.1.7)		antibiotic target in susceptible species	8994972
BLAT	Drug Target	TTD	Bacillus coagulans H-1	fig|1236905.3.peg.2174		VBIBacCoa259451_2174	TTDI02058			Translation elongation factor Tu				98	98	85	1e-196
BLAT	Transporter	TCDB	Bacillus coagulans H-1	fig|1236905.3.peg.430		VBIBacCoa259451_0430	Q01465	Bacillus subtilis (strain 168)		Rod shape-determining protein MreB	the cell shape-determining mrebcd (mrebcd) family.	9.B.157.1.1		97	97	83	1e-153
K-mer Search	Antibiotic Resistance	PATRIC	Bacillus coagulans H-1	fig|1236905.3.peg.2897		VBIBacCoa259451_2897				UDP-N-acetylglucosamine 1-carboxyvinyltransferase (EC 2.5.1.7)		antibiotic target in susceptible species	8994972
K-mer Search	Antibiotic Resistance	PATRIC	Bacillus coagulans H-1	fig|1236905.3.peg.2174		VBIBacCoa259451_2174				Translation elongation factor Tu		antibiotic target in susceptible species	364475;9678602
BLAT	Drug Target	DrugBank	Bacillus coagulans H-1	fig|1236905.3.peg.1226		VBIBacCoa259451_1226	P96622	Bacillus subtilis (strain 168)		Programmed cell death toxin YdcE	2-(2-{2-[2-(2-Methoxy-Ethoxy)-Ethoxy]-Ethoxy}-Ethoxy)-Ethanol	Drug target		45	92	86	1e-18
K-mer Search	Antibiotic Resistance	PATRIC	Bacillus coagulans H-1	fig|1236905.3.peg.599		VBIBacCoa259451_0599				Two-component sensor histidine kinase BceS		regulator modulating expression of antibiotic resistance genes	25118291
BLASTP	Human Homolog	Human	Bacillus coagulans H-1	fig|1236905.3.peg.102		VBIBacCoa259451_0102	NP_002504.2	Homo sapiens		Nucleoside diphosphate kinase (EC 2.7.4.6)				81	93	62	9e-62
K-mer Search	Antibiotic Resistance	PATRIC	Bacillus coagulans H-1	fig|1236905.3.peg.2170		VBIBacCoa259451_2170				SSU ribosomal protein S12p (S23e)		antibiotic target in susceptible species	7934937
BLASTP	Human Homolog	Human	Bacillus coagulans H-1	fig|1236905.3.peg.2280		VBIBacCoa259451_2280	NP_001924.2	Homo sapiens		Dihydrolipoamide succinyltransferase component (E2) of 2-oxoglutarate dehydrogenase complex (EC 2.3.1.61)				55	60	53	8e-84
BLAT	Drug Target	DrugBank	Bacillus coagulans H-1	fig|1236905.3.peg.1782		VBIBacCoa259451_1782	P00362	Geobacillus stearothermophilus		NAD-dependent glyceraldehyde-3-phosphate dehydrogenase (EC 1.2.1.12)	Glyceraldehyde-3-Phosphate	Drug target		100	100	84	1e-160
BLASTP	Human Homolog	Human	Bacillus coagulans H-1	fig|1236905.3.peg.2428		VBIBacCoa259451_2428	NP_550433.1	Homo sapiens		Uracil-DNA glycosylase, family 1 (EC 3.2.2.27)				68	93	52	2e-69
BLASTP	Human Homolog	Human	Bacillus coagulans H-1	fig|1236905.3.peg.3119		VBIBacCoa259451_3119	NP_006003.1	Homo sapiens		ATP-dependent Clp protease proteolytic subunit ClpP (EC 3.4.21.92)				68	96	56	7e-74
K-mer Search	Antibiotic Resistance	PATRIC	Bacillus coagulans H-1	fig|1236905.3.peg.2191		VBIBacCoa259451_2191				LSU ribosomal protein L6p (L9e)		antibiotic target in susceptible species	19289529;17923494
BLAT	Antibiotic Resistance	CARD	Bacillus coagulans H-1	fig|1236905.3.peg.2174		VBIBacCoa259451_2174	YP_006374661.1	Enterococcus faecium DO		Translation elongation factor Tu		antibiotic resistant gene variant or mutant;elfamycin resistance gene		93	100	85	1e-200
BLAT	Transporter	TCDB	Bacillus coagulans H-1	fig|1236905.3.peg.271		VBIBacCoa259451_0271	P45946	Bacillus subtilis		Arsenical-resistance protein ACR3	the arsenical resistance-3 (acr3) family.	2.A.59.1.2	19383706;7489895;7704261;8969508;9384377;9537360	98	96	88	1e-176
K-mer Search	Antibiotic Resistance	PATRIC	Bacillus coagulans H-1	fig|1236905.3.peg.1006		VBIBacCoa259451_1006				DNA gyrase subunit B (EC 5.99.1.3)		antibiotic target in susceptible species	21693461;22279180;9293187
BLASTP	Human Homolog	Human	Bacillus coagulans H-1	fig|1236905.3.peg.800		VBIBacCoa259451_0800	XP_006724053.1	Homo sapiens		Phosphoribosylformylglycinamidine cyclo-ligase (EC 6.3.3.1)				33	95	50	3e-105
BLASTP	Human Homolog	Human	Bacillus coagulans H-1	fig|1236905.3.peg.558		VBIBacCoa259451_0558	NP_000134.2	Homo sapiens		Fumarate hydratase class II (EC 4.2.1.2)				89	98	59	0
K-mer Search	Antibiotic Resistance	PATRIC	Bacillus coagulans H-1	fig|1236905.3.peg.1005		VBIBacCoa259451_1005				DNA gyrase subunit A (EC 5.99.1.3)		antibiotic target in susceptible species	9293187
BLAT	Drug Target	DrugBank	Bacillus coagulans H-1	fig|1236905.3.peg.1791		VBIBacCoa259451_1791	Q06174	Geobacillus stearothermophilus		Carboxylesterase (EC 3.1.1.1)	Propyl Acetate	Drug target		100	98	80	1e-120
BLASTP	Human Homolog	Human	Bacillus coagulans H-1	fig|1236905.3.peg.2913		VBIBacCoa259451_2913	NP_000010.1	Homo sapiens		Acetyl-CoA acetyltransferase (EC 2.3.1.9)				14	86	58	2e-15
BLASTP	Human Homolog	Human	Bacillus coagulans H-1	fig|1236905.3.peg.1418		VBIBacCoa259451_1418	XP_005248532.1	Homo sapiens		Peptidyl-prolyl cis-trans isomerase (EC 5.2.1.8)				47	89	53	3e-51
BLASTP	Human Homolog	Human	Bacillus coagulans H-1	fig|1236905.3.peg.1915		VBIBacCoa259451_1915	NP_006651.2	Homo sapiens		ATP-dependent Clp protease ATP-binding subunit ClpX				51	72	52	1e-101
BLASTP	Human Homolog	Human	Bacillus coagulans H-1	fig|1236905.3.peg.2807		VBIBacCoa259451_2807	NP_003840.2	Homo sapiens		Succinyl-CoA ligase [ADP-forming] alpha chain (EC 6.2.1.5)				85	97	60	7e-102
BLASTP	Human Homolog	Human	Bacillus coagulans H-1	fig|1236905.3.peg.2174		VBIBacCoa259451_2174	NP_003312.3	Homo sapiens		Translation elongation factor Tu				86	99	59	5e-168
BLASTP	Human Homolog	Human	Bacillus coagulans H-1	fig|1236905.3.peg.625		VBIBacCoa259451_0625	XP_006716840.1	Homo sapiens		Aconitate hydratase (EC 4.2.1.3)				96	96	54	0
BLAT	Transporter	TCDB	Bacillus coagulans H-1	fig|1236905.3.peg.1767		VBIBacCoa259451_1767	P26904	Bacillus subtilis		Dipeptide ABC transporter, permease protein DppC (TC 3.A.1.5.2)	the atp-binding cassette (abc) superfamily.	3.A.1.5.2	11069674;11473256;1766370;19383706;3145906;9384377	89	89	81	1e-135
BLASTP	Human Homolog	Human	Bacillus coagulans H-1	fig|1236905.3.peg.1782		VBIBacCoa259451_1782	NP_002037.2	Homo sapiens		NAD-dependent glyceraldehyde-3-phosphate dehydrogenase (EC 1.2.1.12)				98	98	52	7e-118
K-mer Search	Antibiotic Resistance	PATRIC	Bacillus coagulans H-1	fig|1236905.3.peg.2297		VBIBacCoa259451_2297				Glycerophosphoryl diester phosphodiesterase (EC 3.1.4.46)		protein altering cell wall charge conferring antibiotic resistance	21899450
BLAT	Transporter	TCDB	Bacillus coagulans H-1	fig|1236905.3.peg.1938		VBIBacCoa259451_1938	Q65GF4	Bacillus licheniformis (strain DSM 13 / ATCC 14580)		Succinate dehydrogenase flavoprotein subunit (EC 1.3.5.1)	the prokaryotic succinate dehydrogenase (sdh) family.	3.D.10.1.1	15383718;15461803	93	94	85	1e-289
BLASTP	Human Homolog	Human	Bacillus coagulans H-1	fig|1236905.3.peg.151		VBIBacCoa259451_0151	XP_005246575.1	Homo sapiens		Heat shock protein 60 kDa family chaperone GroEL				91	96	52	0
BLAT	Virulence Factor	Victors	Bacillus coagulans H-1	fig|1236905.3.peg.1915		VBIBacCoa259451_1915	227817253	Bacillus anthracis str. CDC 684		ATP-dependent Clp protease ATP-binding subunit ClpX			20375606	98	97	85	1e-203
K-mer Search	Antibiotic Resistance	PATRIC	Bacillus coagulans H-1	fig|1236905.3.peg.2365		VBIBacCoa259451_2365				DNA-directed RNA polymerase beta' subunit (EC 2.7.7.6)		antibiotic target in susceptible species	16723576
BLASTP	Human Homolog	Human	Bacillus coagulans H-1	fig|1236905.3.peg.3323		VBIBacCoa259451_3323	NP_001743.1	Homo sapiens		Catalase KatE (EC 1.11.1.6)				89	95	51	1e-164
K-mer Search	Antibiotic Resistance	PATRIC	Bacillus coagulans H-1	fig|1236905.3.peg.911		VBIBacCoa259451_0911				Glycerophosphoryl diester phosphodiesterase (EC 3.1.4.46)		protein altering cell wall charge conferring antibiotic resistance	21899450
BLASTP	Human Homolog	Human	Bacillus coagulans H-1	fig|1236905.3.peg.961		VBIBacCoa259451_0961	NP_001001937.1	Homo sapiens		ATP synthase alpha chain (EC 3.6.3.14)				91	98	58	0
BLASTP	Human Homolog	Human	Bacillus coagulans H-1	fig|1236905.3.peg.958		VBIBacCoa259451_0958	NP_001677.2	Homo sapiens		ATP synthase beta chain (EC 3.6.3.14)				87	98	67	0
K-mer Search	Antibiotic Resistance	PATRIC	Bacillus coagulans H-1	fig|1236905.3.peg.598		VBIBacCoa259451_0598				Bacitracin export ATP-binding protein BceA		efflux pump conferring antibiotic resistance	25118291
K-mer Search	Antibiotic Resistance	PATRIC	Bacillus coagulans H-1	fig|1236905.3.peg.2173		VBIBacCoa259451_2173				Translation elongation factor G		antibiotic target in susceptible species	17980694;19289529;19289529;17325218;19289529
BLASTP	Human Homolog	Human	Bacillus coagulans H-1	fig|1236905.3.peg.1787		VBIBacCoa259451_1787	NP_001966.1	Homo sapiens		Enolase (EC 4.2.1.11)				97	97	52	5e-149
K-mer Search	Antibiotic Resistance	PATRIC	Bacillus coagulans H-1	fig|1236905.3.peg.2861		VBIBacCoa259451_2861				1-deoxy-D-xylulose 5-phosphate reductoisomerase (EC 1.1.1.267)		antibiotic target in susceptible species	16321944
K-mer Search	Antibiotic Resistance	PATRIC	Bacillus coagulans H-1	fig|1236905.3.peg.2689		VBIBacCoa259451_2689				D-alanine--D-alanine ligase (EC 6.3.2.4)		antibiotic target in susceptible species	24303782;24033232
BLASTP	Human Homolog	Human	Bacillus coagulans H-1	fig|1236905.3.peg.2091		VBIBacCoa259451_2091	XP_006713279.1	Homo sapiens		3-oxoacyl-[acyl-carrier-protein] synthase, KASII (EC 2.3.1.179)				90	98	50	1e-131
BLAT	Transporter	TCDB	Bacillus coagulans H-1	fig|1236905.3.peg.1937		VBIBacCoa259451_1937	Q65GF5	Bacillus licheniformis (strain DSM 13 / ATCC 14580)		Succinate dehydrogenase iron-sulfur protein (EC 1.3.5.1)	the prokaryotic succinate dehydrogenase (sdh) family.	3.D.10.1.1	15383718;15461803	99	99	81	1e-128
BLAT	Drug Target	DrugBank	Bacillus coagulans H-1	fig|1236905.3.peg.51		VBIBacCoa259451_0051	Q59192	Bacillus subtilis (strain 168)		DNA topoisomerase IV subunit B (EC 5.99.1.3)	Ciprofloxacin	Drug target		83	83	83	1e-271
K-mer Search	Antibiotic Resistance	PATRIC	Bacillus coagulans H-1	fig|1236905.3.peg.2175		VBIBacCoa259451_2175				SSU ribosomal protein S10p (S20e)		antibiotic target in susceptible species	26124155
BLAT	Transporter	TCDB	Bacillus coagulans H-1	fig|1236905.3.peg.355		VBIBacCoa259451_0355	G4NXA5	Bacillus subtilis subsp. spizizenii TU-B-10		Chaperone protein DnaK	the cation channel-forming heat shock protein-70 (hsp70) family.	1.A.33.1.4		95	95	84	1e-286
K-mer Search	Antibiotic Resistance	PATRIC	Bacillus coagulans H-1	fig|1236905.3.peg.2091		VBIBacCoa259451_2091				3-oxoacyl-[acyl-carrier-protein] synthase, KASII (EC 2.3.1.179)		antibiotic target in susceptible species	10428945
BLAT	Transporter	TCDB	Bacillus coagulans H-1	fig|1236905.3.peg.1571		VBIBacCoa259451_1571	P49780	Bacillus subtilis		Stage III sporulation protein AC	the multicomponent putative spoiiiae exporter (spoiiia-e) family.	9.B.70.1.1	1766372;19383706;8969508;9384377	98	100	83	8e-26
BLASTP	Human Homolog	Human	Bacillus coagulans H-1	fig|1236905.3.peg.1821		VBIBacCoa259451_1821	NP_005882.2	Homo sapiens		3-ketoacyl-CoA thiolase (EC 2.3.1.16) @ Acetyl-CoA acetyltransferase (EC 2.3.1.9)				97	98	53	1e-140
BLAT	Drug Target	DrugBank	Bacillus coagulans H-1	fig|1236905.3.peg.3176		VBIBacCoa259451_3176	P39126	Bacillus subtilis (strain 168)		Isocitrate dehydrogenase [NADP] (EC 1.1.1.42)	(R)-Propylene glycol;Citric Acid;S-1,2-Propanediol;S,S-(2-Hydroxyethyl)Thiocysteine'	Drug target		99	99	89	1e-222
K-mer Search	Antibiotic Resistance	PATRIC	Bacillus coagulans H-1	fig|1236905.3.peg.684		VBIBacCoa259451_0684				Enoyl-[acyl-carrier-protein] reductase [NADPH] (EC 1.3.1.104), FabL		antibiotic target replacement protein	21185310
BLAT	Drug Target	DrugBank	Bacillus coagulans H-1	fig|1236905.3.peg.970		VBIBacCoa259451_0970	Q5KUI2	Geobacillus kaustophilus (strain HTA426)		Serine hydroxymethyltransferase (EC 2.1.2.1)	(6R)-Folinic acid	Drug target		98	97	81	1e-195
BLASTP	Human Homolog	Human	Bacillus coagulans H-1	fig|1236905.3.peg.2630		VBIBacCoa259451_2630	NP_001019636.1	Homo sapiens		Superoxide dismutase [Mn] (EC 1.15.1.1)				88	99	52	3e-68
BLASTP	Human Homolog	Human	Bacillus coagulans H-1	fig|1236905.3.peg.2281		VBIBacCoa259451_2281	NP_000681.2	Homo sapiens		Aldehyde dehydrogenase (EC 1.2.1.3)				92	95	55	0
K-mer Search	Antibiotic Resistance	PATRIC	Bacillus coagulans H-1	fig|1236905.3.peg.597		VBIBacCoa259451_0597				Bacitracin export permease protein BceB		efflux pump conferring antibiotic resistance	25118291
BLASTP	Human Homolog	Human	Bacillus coagulans H-1	fig|1236905.3.peg.2569		VBIBacCoa259451_2569	NP_002622.2	Homo sapiens		6-phosphogluconate dehydrogenase, decarboxylating (EC 1.1.1.44)				97	99	57	0
BLASTP	Human Homolog	Human	Bacillus coagulans H-1	fig|1236905.3.peg.1136		VBIBacCoa259451_1136	NP_001186658.1	Homo sapiens		Peptide-methionine (S)-S-oxide reductase MsrA (EC 1.8.4.11)				17	53	53	9e-05
BLASTP	Human Homolog	Human	Bacillus coagulans H-1	fig|1236905.3.peg.2511		VBIBacCoa259451_2511	XP_006717934.1	Homo sapiens		Ornithine aminotransferase (EC 2.6.1.13)				90	97	50	3e-137
K-mer Search	Antibiotic Resistance	PATRIC	Bacillus coagulans H-1	fig|1236905.3.peg.724		VBIBacCoa259451_0724				Isoleucyl-tRNA synthetase (EC 6.1.1.5)		antibiotic target in susceptible species	7929087
K-mer Search	Antibiotic Resistance	PATRIC	Bacillus coagulans H-1	fig|1236905.3.peg.2895		VBIBacCoa259451_2895				Transcription termination factor Rho		antibiotic target in susceptible species	8466900
BLASTP	Human Homolog	Human	Bacillus coagulans H-1	fig|1236905.3.peg.990		VBIBacCoa259451_0990	NP_004484.1	Homo sapiens		hypothetical protein				95	96	61	2e-98
K-mer Search	Antibiotic Resistance	PATRIC	Bacillus coagulans H-1	fig|1236905.3.peg.2123		VBIBacCoa259451_2123				Enoyl-[acyl-carrier-protein] reductase [NADH] (EC 1.3.1.9)		antibiotic target in susceptible species	18193820;10869170;8284673
BLAT	Virulence Factor	PATRIC_VF	Bacillus coagulans H-1	fig|1236905.3.peg.794		VBIBacCoa259451_0794	LMOh7858_1898	Listeria monocytogenes serotype 4b str. H7858		Adenylosuccinate lyase (EC 4.3.2.2) @ SAICAR lyase (EC 4.3.2.2)		Virulence	22506772	91	90	83	1e-194
BLAT	Virulence Factor	PATRIC_VF	Bacillus coagulans H-1	fig|1236905.3.peg.2924		VBIBacCoa259451_2924	lmo0055	Listeria monocytogenes EGD-e		Adenylosuccinate synthetase (EC 6.3.4.4)		Intracellular survival and replication	20955543	99	99	83	1e-213
BLASTP	Human Homolog	Human	Bacillus coagulans H-1	fig|1236905.3.peg.1563		VBIBacCoa259451_1563	XP_005254116.1	Homo sapiens		Biotin carboxylase of acetyl-CoA carboxylase (EC 6.3.4.14)				68	97	50	5e-150
BLASTP	Human Homolog	Human	Bacillus coagulans H-1	fig|1236905.3.peg.355		VBIBacCoa259451_0355	NP_004125.3	Homo sapiens		Chaperone protein DnaK				91	97	55	0
K-mer Search	Antibiotic Resistance	PATRIC	Bacillus coagulans H-1	fig|1236905.3.peg.1228		VBIBacCoa259451_1228				Alanine racemase (EC 5.1.1.1)		antibiotic target in susceptible species	19748470;24303782
K-mer Search	Antibiotic Resistance	PATRIC	Bacillus coagulans H-1	fig|1236905.3.peg.600		VBIBacCoa259451_0600				Two-component response regulator BceR		regulator modulating expression of antibiotic resistance genes	25118291
K-mer Search	Antibiotic Resistance	PATRIC	Bacillus coagulans H-1	fig|1236905.3.peg.2364		VBIBacCoa259451_2364				DNA-directed RNA polymerase beta subunit (EC 2.7.7.6)		antibiotic target in susceptible species	3050121;15047531;16723576
K-mer Search	Antibiotic Resistance	PATRIC	Bacillus coagulans H-1	fig|1236905.3.peg.3082		VBIBacCoa259451_3082				Dihydrofolate reductase (EC 1.5.1.3)		antibiotic target in susceptible species	20169085;25288078
K-mer Search	Antibiotic Resistance	PATRIC	Bacillus coagulans H-1	fig|1236905.3.peg.294		VBIBacCoa259451_0294				16S rRNA (guanine(527)-N(7))-methyltransferase (EC 2.1.1.170)		gene conferring resistance via absence	17238915
BLASTP	Human Homolog	Human	Bacillus coagulans H-1	fig|1236905.3.peg.919		VBIBacCoa259451_0919	NP_001776.1	Homo sapiens		Cytidine deaminase (EC 3.5.4.5)				87	98	51	2e-37
BLASTP	Human Homolog	Human	Bacillus coagulans H-1	fig|1236905.3.peg.3083		VBIBacCoa259451_3083	NP_001062.1	Homo sapiens		Thymidylate synthase (EC 2.1.1.45)				90	98	55	3e-105
K-mer Search	Antibiotic Resistance	PATRIC	Bacillus coagulans H-1	fig|1236905.3.peg.2699		VBIBacCoa259451_2699				Dihydropteroate synthase (EC 2.5.1.15)		antibiotic target in susceptible species	15673783
K-mer Search	Antibiotic Resistance	PATRIC	Bacillus coagulans H-1	fig|1236905.3.peg.3325		VBIBacCoa259451_3325				Undecaprenyl-diphosphatase BcrC (EC 3.6.1.27), conveys bacitracin resistance		antibiotic target protection protein	12486040;15778224;15946938
BLASTP	Human Homolog	Human	Bacillus coagulans H-1	fig|1236905.3.peg.230		VBIBacCoa259451_0230	NP_005902.1	Homo sapiens		S-adenosylmethionine synthetase (EC 2.5.1.6)				94	95	59	2e-150
BLAT	Virulence Factor	Victors	Bacillus coagulans H-1	fig|1236905.3.peg.2818		VBIBacCoa259451_2818	227813264	Bacillus anthracis str. CDC 684		GTP-sensing transcriptional pleiotropic repressor CodY			19651859	98	98	82	1e-115
BLASTP	Human Homolog	Human	Bacillus coagulans H-1	fig|1236905.3.peg.988		VBIBacCoa259451_0988	XP_005260724.1	Homo sapiens		O-acetyl-ADP-ribose deacetylase				36	84	53	9e-45
BLASTP	Human Homolog	Human	Bacillus coagulans H-1	fig|1236905.3.peg.1095		VBIBacCoa259451_1095	NP_001071.1	Homo sapiens		Succinate-semialdehyde dehydrogenase [NAD(P)+] (EC 1.2.1.16)				87	97	54	6e-165
BLAT	Drug Target	DrugBank	Bacillus coagulans H-1	fig|1236905.3.peg.968		VBIBacCoa259451_0968	Q5KUI3	Geobacillus kaustophilus (strain HTA426)		Uracil phosphoribosyltransferase (EC 2.4.2.9)	Uridine-5'-Monophosphate	Drug target		97	97	83	9e-99
K-mer Search	Antibiotic Resistance	PATRIC	Bacillus coagulans H-1	fig|1236905.3.peg.2610		VBIBacCoa259451_2610				Broad-specificity multidrug efflux pump YkkC		efflux pump conferring antibiotic resistance	10735877
BLASTP	Human Homolog	Human	Bacillus coagulans H-1	fig|1236905.3.peg.1879		VBIBacCoa259451_1879	NP_064580.2	Homo sapiens		hypothetical protein				12	86	50	7e-07
BLASTP	Human Homolog	Human	Bacillus coagulans H-1	fig|1236905.3.peg.2211		VBIBacCoa259451_2211	NP_005434.4	Homo sapiens		Adenylylsulfate kinase (EC 2.7.1.25)				32	97	52	1e-65
BLASTP	Human Homolog	Human	Bacillus coagulans H-1	fig|1236905.3.peg.304		VBIBacCoa259451_0304	NP_001180241.1	Homo sapiens		hypothetical protein				18	86	68	2e-28
BLAT	Virulence Factor	Victors	Bacillus coagulans MA-13	fig|1398.206.peg.3433			227817253	Bacillus anthracis str. CDC 684	clpX	ATP-dependent Clp protease ATP-binding subunit ClpX			20375606	98	97	85	1e-202
BLAT	Drug Target	DrugBank	Bacillus coagulans MA-13	fig|1398.206.peg.1966			Q59192	Bacillus subtilis (strain 168)	parE	DNA topoisomerase IV subunit B (EC 5.99.1.3)	Ciprofloxacin	Drug target		83	83	83	1e-272
BLAT	Drug Target	DrugBank	Bacillus coagulans MA-13	fig|1398.206.peg.2105			P25553	Escherichia coli (strain K12)	aldA	Aldehyde dehydrogenase A (EC 1.2.1.22) @ Glycolaldehyde dehydrogenase (EC 1.2.1.21)	Deoxycholic Acid	Drug target		10	84	85	2e-19
K-mer Search	Antibiotic Resistance	PATRIC	Bacillus coagulans MA-13	fig|1398.206.peg.3229					Alr	Alanine racemase (EC 5.1.1.1)	Alanine racemase (EC 5.1.1.1)	antibiotic target in susceptible species	19748470;24303782
BLAT	Transporter	TCDB	Bacillus coagulans MA-13	fig|1398.206.peg.3397			Q01465	Bacillus subtilis (strain 168)		Rod shape-determining protein MreB	the cell shape-determining mrebcd (mrebcd) family.	9.B.157.1.1		97	97	83	1e-153
BLAT	Drug Target	DrugBank	Bacillus coagulans MA-13	fig|1398.206.peg.1419			P00362	Geobacillus stearothermophilus	gap	NAD-dependent glyceraldehyde-3-phosphate dehydrogenase (EC 1.2.1.12)	Glyceraldehyde-3-Phosphate	Drug target		100	100	84	1e-161
K-mer Search	Antibiotic Resistance	PATRIC	Bacillus coagulans MA-13	fig|1398.206.peg.1596					EF-Tu	Translation elongation factor Tu	Translation elongation factor Tu	antibiotic target in susceptible species	364475;9678602
BLAT	Drug Target	DrugBank	Bacillus coagulans MA-13	fig|1398.206.peg.3227			P96622	Bacillus subtilis (strain 168)	ndoA	Programmed cell death toxin YdcE	2-(2-{2-[2-(2-Methoxy-Ethoxy)-Ethoxy]-Ethoxy}-Ethoxy)-Ethanol	Drug target		97	97	91	8e-53
BLAT	Antibiotic Resistance	CARD	Bacillus coagulans MA-13	fig|1398.206.peg.1596			YP_006374661.1	Enterococcus faecium DO		Translation elongation factor Tu		antibiotic resistant gene variant or mutant,elfamycin resistance gene		93	100	85	1e-200
BLAT	Transporter	TCDB	Bacillus coagulans MA-13	fig|1398.206.peg.2030			P46912	Bacillus subtilis		Menaquinone-cytochrome c reductase, cytochrome B subunit	the proton-translocating quinol:cytochrome c reductase (qcr) superfamily.	3.D.3.4.1	7592464;8760912;9384377;9535866	100	100	89	1e-119
BLAT	Drug Target	DrugBank	Bacillus coagulans MA-13	fig|1398.206.peg.1412			Q06174	Geobacillus stearothermophilus	est	Carboxylesterase (EC 3.1.1.1)	Propyl Acetate	Drug target		100	98	80	1e-120
K-mer Search	Antibiotic Resistance	PATRIC	Bacillus coagulans MA-13	fig|1398.206.peg.1129					gidB	16S rRNA (guanine(527)-N(7))-methyltransferase (EC 2.1.1.170)	16S rRNA (guanine(527)-N(7))-methyltransferase (EC 2.1.1.170)	gene conferring resistance via absence	17238915
BLAT	Transporter	TCDB	Bacillus coagulans MA-13	fig|1398.206.peg.1068			Q65GF5	Bacillus licheniformis (strain DSM 13 / ATCC 14580)		Succinate dehydrogenase iron-sulfur protein (EC 1.3.5.1)	the prokaryotic succinate dehydrogenase (sdh) family.	3.D.10.1.1	15383718;15461803	99	99	82	1e-128
K-mer Search	Antibiotic Resistance	PATRIC	Bacillus coagulans MA-13	fig|1398.206.peg.420					MurA	UDP-N-acetylglucosamine 1-carboxyvinyltransferase (EC 2.5.1.7)	UDP-N-acetylglucosamine 1-carboxyvinyltransferase (EC 2.5.1.7)	antibiotic target in susceptible species	8994972
K-mer Search	Antibiotic Resistance	PATRIC	Bacillus coagulans MA-13	fig|1398.206.peg.417					rho	Transcription termination factor Rho	Transcription termination factor Rho	antibiotic target in susceptible species	8466900
BLAT	Transporter	TCDB	Bacillus coagulans MA-13	fig|1398.206.peg.570			P45946	Bacillus subtilis		Arsenical-resistance protein ACR3	the arsenical resistance-3 (acr3) family.	2.A.59.1.2	19383706;7489895;7704261;8969508;9384377;9537360	98	96	87	1e-175
K-mer Search	Antibiotic Resistance	PATRIC	Bacillus coagulans MA-13	fig|1398.206.peg.2737					kasA	3-oxoacyl-[acyl-carrier-protein] synthase, KASII (EC 2.3.1.179)	3-oxoacyl-[acyl-carrier-protein] synthase, KASII (EC 2.3.1.179)	antibiotic target in susceptible species	10428945
K-mer Search	Antibiotic Resistance	PATRIC	Bacillus coagulans MA-13	fig|1398.206.peg.1932					BceS	Two-component sensor histidine kinase BceS	Two-component sensor histidine kinase BceS	regulator modulating expression of antibiotic resistance genes	25118291
K-mer Search	Antibiotic Resistance	PATRIC	Bacillus coagulans MA-13	fig|1398.206.peg.522					folP	Dihydropteroate synthase (EC 2.5.1.15)	Dihydropteroate synthase (EC 2.5.1.15)	antibiotic target in susceptible species	15673783
K-mer Search	Antibiotic Resistance	PATRIC	Bacillus coagulans MA-13	fig|1398.206.peg.1602					rpoB	DNA-directed RNA polymerase beta subunit (EC 2.7.7.6)	DNA-directed RNA polymerase beta subunit (EC 2.7.7.6)	antibiotic target in susceptible species	3050121;15047531;16723576
K-mer Search	Antibiotic Resistance	PATRIC	Bacillus coagulans MA-13	fig|1398.206.peg.2700					inhA, fabI	Enoyl-[acyl-carrier-protein] reductase [NADH] (EC 1.3.1.9)	Enoyl-[acyl-carrier-protein] reductase [NADH] (EC 1.3.1.9)	antibiotic target in susceptible species	18193820;10869170;8284673
K-mer Search	Antibiotic Resistance	PATRIC	Bacillus coagulans MA-13	fig|1398.206.peg.1658						weak similarity to aminoglycoside N(3)-acetyltransferase	weak similarity to aminoglycoside N(3)-acetyltransferase	antibiotic inactivation enzyme
BLAT	Virulence Factor	PATRIC_VF	Bacillus coagulans MA-13	fig|1398.206.peg.798			LMOh7858_1898	Listeria monocytogenes serotype 4b str. H7858	purB	Adenylosuccinate lyase (EC 4.3.2.2) @ SAICAR lyase (EC 4.3.2.2)		Virulence	22506772	91	90	83	1e-194
K-mer Search	Antibiotic Resistance	PATRIC	Bacillus coagulans MA-13	fig|1398.206.peg.3122					GdpD	Glycerophosphoryl diester phosphodiesterase (EC 3.1.4.46)	Glycerophosphoryl diester phosphodiesterase (EC 3.1.4.46)	protein altering cell wall charge conferring antibiotic resistance	21899450
BLAT	Drug Target	TTD	Bacillus coagulans MA-13	fig|1398.206.peg.1596			TTDI02058			Translation elongation factor Tu				98	98	85	1e-196
BLAT	Transporter	TCDB	Bacillus coagulans MA-13	fig|1398.206.peg.3144			P49780	Bacillus subtilis		Stage III sporulation protein AC	the multicomponent putative spoiiiae exporter (spoiiia-e) family.	9.B.70.1.1	1766372;19383706;8969508;9384377	98	100	83	8e-26
BLAT	Drug Target	DrugBank	Bacillus coagulans MA-13	fig|1398.206.peg.2892			P39126	Bacillus subtilis (strain 168)	icd	Isocitrate dehydrogenase [NADP] (EC 1.1.1.42)	(R)-Propylene glycol;Citric Acid;S-1,2-Propanediol;S,S-(2-Hydroxyethyl)Thiocysteine	Drug target		99	99	89	1e-222
K-mer Search	Antibiotic Resistance	PATRIC	Bacillus coagulans MA-13	fig|1398.206.peg.1931					BceA	Bacitracin export ATP-binding protein BceA	Bacitracin export ATP-binding protein BceA	efflux pump conferring antibiotic resistance	25118291
BLAT	Drug Target	DrugBank	Bacillus coagulans MA-13	fig|1398.206.peg.3287			Q5KUI3	Geobacillus kaustophilus (strain HTA426)	upp	Uracil phosphoribosyltransferase (EC 2.4.2.9)	Uridine-5'-Monophosphate	Drug target		97	97	83	9e-99
K-mer Search	Antibiotic Resistance	PATRIC	Bacillus coagulans MA-13	fig|1398.206.peg.2622					GdpD	Glycerophosphoryl diester phosphodiesterase (EC 3.1.4.46)	Glycerophosphoryl diester phosphodiesterase (EC 3.1.4.46)	protein altering cell wall charge conferring antibiotic resistance	21899450
BLAT	Transporter	TCDB	Bacillus coagulans MA-13	fig|1398.206.peg.1069			Q65GF4	Bacillus licheniformis (strain DSM 13 / ATCC 14580)		Succinate dehydrogenase flavoprotein subunit (EC 1.3.5.1)	the prokaryotic succinate dehydrogenase (sdh) family.	3.D.10.1.1	15383718;15461803	93	94	85	1e-289
K-mer Search	Antibiotic Resistance	PATRIC	Bacillus coagulans MA-13	fig|1398.206.peg.3314					Iso-tRNA	Isoleucyl-tRNA synthetase (EC 6.1.1.5)	Isoleucyl-tRNA synthetase (EC 6.1.1.5)	antibiotic target in susceptible species	7929087
BLAT	Transporter	TCDB	Bacillus coagulans MA-13	fig|1398.206.peg.1694			E1UCI2	Listeria monocytogenes serotype 4a (strain L99)		PTS system, mannose-specific IID component	the pts mannose-fructose-sorbose (man) family.	4.A.6.1.15		97	97	80	1e-145
K-mer Search	Antibiotic Resistance	PATRIC	Bacillus coagulans MA-13	fig|1398.206.peg.1142					gyrB	DNA gyrase subunit B (EC 5.99.1.3)	DNA gyrase subunit B (EC 5.99.1.3)	antibiotic target in susceptible species	21693461;22279180;9293187
K-mer Search	Antibiotic Resistance	PATRIC	Bacillus coagulans MA-13	fig|1398.206.peg.2466					PgsA	CDP-diacylglycerol--glycerol-3-phosphate 3-phosphatidyltransferase (EC 2.7.8.5)	CDP-diacylglycerol--glycerol-3-phosphate 3-phosphatidyltransferase (EC 2.7.8.5)	protein altering cell wall charge conferring antibiotic resistance	22238576
K-mer Search	Antibiotic Resistance	PATRIC	Bacillus coagulans MA-13	fig|1398.206.peg.208					folA, Dfr	Dihydrofolate reductase (EC 1.5.1.3)	Dihydrofolate reductase (EC 1.5.1.3)	antibiotic target in susceptible species	20169085;25288078
BLAT	Virulence Factor	Victors	Bacillus coagulans MA-13	fig|1398.206.peg.2387			227813264	Bacillus anthracis str. CDC 684	codY	GTP-sensing transcriptional pleiotropic repressor CodY			19651859	98	98	82	1e-115
K-mer Search	Antibiotic Resistance	PATRIC	Bacillus coagulans MA-13	fig|1398.206.peg.846					BcrC	Undecaprenyl-diphosphatase BcrC (EC 3.6.1.27), conveys bacitracin resistance	Undecaprenyl-diphosphatase BcrC (EC 3.6.1.27), conveys bacitracin resistance	antibiotic target protection protein	12486040;15778224;15946938
BLAT	Transporter	TCDB	Bacillus coagulans MA-13	fig|1398.206.peg.2924			G4NXA5	Bacillus subtilis subsp. spizizenii TU-B-10		Chaperone protein DnaK	the cation channel-forming heat shock protein-70 (hsp70) family.	1.A.33.1.4		95	95	85	1e-287
BLAT	Transporter	TCDB	Bacillus coagulans MA-13	fig|1398.206.peg.1439			P26904	Bacillus subtilis		Dipeptide ABC transporter, permease protein DppC (TC 3.A.1.5.2)	the atp-binding cassette (abc) superfamily.	3.A.1.5.2	11069674;11473256;1766370;19383706;3145906;9384377	89	89	81	1e-135
K-mer Search	Antibiotic Resistance	PATRIC	Bacillus coagulans MA-13	fig|1398.206.peg.1143					gyrA	DNA gyrase subunit A (EC 5.99.1.3)	DNA gyrase subunit A (EC 5.99.1.3)	antibiotic target in susceptible species	9293187
K-mer Search	Antibiotic Resistance	PATRIC	Bacillus coagulans MA-13	fig|1398.206.peg.1595					S10p	SSU ribosomal protein S10p (S20e)	SSU ribosomal protein S10p (S20e)	antibiotic target in susceptible species	26124155
K-mer Search	Antibiotic Resistance	PATRIC	Bacillus coagulans MA-13	fig|1398.206.peg.3272					MurA	UDP-N-acetylglucosamine 1-carboxyvinyltransferase (EC 2.5.1.7)	UDP-N-acetylglucosamine 1-carboxyvinyltransferase (EC 2.5.1.7)	antibiotic target in susceptible species	8994972
BLAT	Virulence Factor	PATRIC_VF	Bacillus coagulans MA-13	fig|1398.206.peg.86			lmo0055	Listeria monocytogenes EGD-e	purA	Adenylosuccinate synthetase (EC 6.3.4.4)		Intracellular survival and replication	20955543	99	99	83	1e-213
K-mer Search	Antibiotic Resistance	PATRIC	Bacillus coagulans MA-13	fig|1398.206.peg.1930					BceB	Bacitracin export permease protein BceB	Bacitracin export permease protein BceB	efflux pump conferring antibiotic resistance	25118291
BLAT	Transporter	TCDB	Bacillus coagulans MA-13	fig|1398.206.peg.2202			P46349	Bacillus subtilis		gamma-aminobutyrate (GABA) permease	the amino acid-polyamine-organocation (apc) family.	2.A.3.1.5	19383706;8951816;8969499;9384377	30	96	81	6e-66
K-mer Search	Antibiotic Resistance	PATRIC	Bacillus coagulans MA-13	fig|1398.206.peg.1597					EF-G	Translation elongation factor G	Translation elongation factor G	antibiotic target in susceptible species	17980694
K-mer Search	Antibiotic Resistance	PATRIC	Bacillus coagulans MA-13	fig|1398.206.peg.566					GdpD	Glycerophosphoryl diester phosphodiesterase (EC 3.1.4.46)	Glycerophosphoryl diester phosphodiesterase (EC 3.1.4.46)	protein altering cell wall charge conferring antibiotic resistance	21899450
K-mer Search	Antibiotic Resistance	PATRIC	Bacillus coagulans MA-13	fig|1398.206.peg.1599					S12p	SSU ribosomal protein S12p (S23e)	SSU ribosomal protein S12p (S23e)	antibiotic target in susceptible species	7934937
K-mer Search	Antibiotic Resistance	PATRIC	Bacillus coagulans MA-13	fig|1398.206.peg.3247					Ddl	D-alanine--D-alanine ligase (EC 6.3.2.4)	D-alanine--D-alanine ligase (EC 6.3.2.4)	antibiotic target in susceptible species	24303782;24033232
K-mer Search	Antibiotic Resistance	PATRIC	Bacillus coagulans MA-13	fig|1398.206.peg.1785					YkkCD	Broad-specificity multidrug efflux pump YkkC	Broad-specificity multidrug efflux pump YkkC	efflux pump conferring antibiotic resistance	10735877
K-mer Search	Antibiotic Resistance	PATRIC	Bacillus coagulans MA-13	fig|1398.206.peg.1933					BceR	Two-component response regulator BceR	Two-component response regulator BceR	regulator modulating expression of antibiotic resistance genes	25118291
K-mer Search	Antibiotic Resistance	PATRIC	Bacillus coagulans MA-13	fig|1398.206.peg.1190					fabL	Enoyl-[acyl-carrier-protein] reductase [NADPH] (EC 1.3.1.104), FabL	Enoyl-[acyl-carrier-protein] reductase [NADPH] (EC 1.3.1.104), FabL	antibiotic target replacement protein	21185310
BLAT	Drug Target	DrugBank	Bacillus coagulans MA-13	fig|1398.206.peg.3288			Q5KUI2	Geobacillus kaustophilus (strain HTA426)	glyA	Serine hydroxymethyltransferase (EC 2.1.2.1)	(6R)-Folinic acid	Drug target		98	97	81	1e-195
K-mer Search	Antibiotic Resistance	PATRIC	Bacillus coagulans MA-13	fig|1398.206.peg.1601					rpoC	DNA-directed RNA polymerase beta' subunit (EC 2.7.7.6)	DNA-directed RNA polymerase beta' subunit (EC 2.7.7.6)	antibiotic target in susceptible species	16723576
K-mer Search	Antibiotic Resistance	PATRIC	Bacillus coagulans MA-13	fig|1398.206.peg.2428					dxr	1-deoxy-D-xylulose 5-phosphate reductoisomerase (EC 1.1.1.267)	1-deoxy-D-xylulose 5-phosphate reductoisomerase (EC 1.1.1.267)	antibiotic target in susceptible species	16321944
K-mer Search	Antibiotic Resistance	PATRIC	Bacillus coagulans P38	fig|1398086.3.peg.1709	P421_07620					SSU ribosomal protein S12p (S23e)		antibiotic target in susceptible species	7934937
BLAT	Antibiotic Resistance	CARD	Bacillus coagulans P38	fig|1398086.3.peg.1133	P421_05015		YP_008997285.1	Exiguobacterium sp. S3-2		Macrolide resistance, MFS efflux pump => Mef(A)		efflux pump conferring antibiotic resistance		89	100	89	1e-184
BLAT	Transporter	TCDB	Bacillus coagulans P38	fig|1398086.3.peg.529	P421_02375		Q65GF4	Bacillus licheniformis (strain DSM 13 / ATCC 14580)		Succinate dehydrogenase flavoprotein subunit (EC 1.3.5.1)	the prokaryotic succinate dehydrogenase (sdh) family.	3.D.10.1.1	15383718;15461803	93	94	85	1e-288
BLAT	Transporter	TCDB	Bacillus coagulans P38	fig|1398086.3.peg.3566	P421_15715		Q45593	Bacillus subtilis		ABC transporter predicted to export YydF, ATP-binding protein	the atp-binding cassette (abc) superfamily.	3.A.1.133.1	15743949;17921301;9205843;9384377	100	100	82	5e-96
BLASTP	Human Homolog	Human	Bacillus coagulans P38	fig|1398086.3.peg.672	P421_02980		NP_003840.2	Homo sapiens		Succinyl-CoA ligase [ADP-forming] alpha chain (EC 6.2.1.5)				85	97	62	0
K-mer Search	Antibiotic Resistance	PATRIC	Bacillus coagulans P38	fig|1398086.3.peg.1643	P421_07325					Isoleucyl-tRNA synthetase (EC 6.1.1.5)		antibiotic target in susceptible species	7929087
K-mer Search	Antibiotic Resistance	PATRIC	Bacillus coagulans P38	fig|1398086.3.peg.2058	P421_09130					Transcription termination factor Rho		antibiotic target in susceptible species	8466900
BLASTP	Human Homolog	Human	Bacillus coagulans P38	fig|1398086.3.peg.3517	P421_15480		XP_005248532.1	Homo sapiens		Peptidyl-prolyl cis-trans isomerase (EC 5.2.1.8)				47	89	53	3e-51
BLAT	Transporter	TCDB	Bacillus coagulans P38	fig|1398086.3.peg.329	P421_01475		P46912	Bacillus subtilis		Menaquinone-cytochrome c reductase, cytochrome B subunit	the proton-translocating quinol:cytochrome c reductase (qcr) superfamily.	3.D.3.4.1	7592464;8760912;9384377;9535866	100	100	89	1e-119
K-mer Search	Antibiotic Resistance	PATRIC	Bacillus coagulans P38	fig|1398086.3.peg.2390	P421_10535					3-oxoacyl-[acyl-carrier-protein] synthase, KASII (EC 2.3.1.179)		antibiotic target in susceptible species	10428945
BLASTP	Human Homolog	Human	Bacillus coagulans P38	fig|1398086.3.peg.86	P421_00415		NP_004125.3	Homo sapiens		Chaperone protein DnaK				91	97	55	0
K-mer Search	Antibiotic Resistance	PATRIC	Bacillus coagulans P38	fig|1398086.3.peg.2004	P421_08900					D-alanine--D-alanine ligase (EC 6.3.2.4)		antibiotic target in susceptible species	24303782;24033232
K-mer Search	Antibiotic Resistance	PATRIC	Bacillus coagulans P38	fig|1398086.3.peg.1233	P421_05440					Two-component response regulator BceR		regulator modulating expression of antibiotic resistance genes	25118291
K-mer Search	Antibiotic Resistance	PATRIC	Bacillus coagulans P38	fig|1398086.3.peg.1133	P421_05015					Macrolide resistance, MFS efflux pump => Mef(A)		efflux pump conferring antibiotic resistance	10952626
BLASTP	Human Homolog	Human	Bacillus coagulans P38	fig|1398086.3.peg.1712	P421_07635		NP_003312.3	Homo sapiens		Translation elongation factor Tu				85	98	58	0
BLASTP	Human Homolog	Human	Bacillus coagulans P38	fig|1398086.3.peg.3495	P421_15400		NP_006003.1	Homo sapiens		ATP-dependent Clp protease proteolytic subunit ClpP (EC 3.4.21.92)				68	96	55	2e-72
K-mer Search	Antibiotic Resistance	PATRIC	Bacillus coagulans P38	fig|1398086.3.peg.3148	P421_13865					Alanine racemase (EC 5.1.1.1)		antibiotic target in susceptible species	19748470;24303782
BLASTP	Human Homolog	Human	Bacillus coagulans P38	fig|1398086.3.peg.1321	P421_05930		XP_005269899.1	Homo sapiens		S-adenosylmethionine synthetase (EC 2.5.1.6)				94	95	58	0
BLASTP	Human Homolog	Human	Bacillus coagulans P38	fig|1398086.3.peg.3585	P421_15810		NP_005882.2	Homo sapiens		3-ketoacyl-CoA thiolase (EC 2.3.1.16) @ Acetyl-CoA acetyltransferase (EC 2.3.1.9)				97	98	53	3e-142
K-mer Search	Antibiotic Resistance	PATRIC	Bacillus coagulans P38	fig|1398086.3.peg.1077	P421_04735					DNA gyrase subunit A (EC 5.99.1.3)		antibiotic target in susceptible species	9293187
BLASTP	Human Homolog	Human	Bacillus coagulans P38	fig|1398086.3.peg.2796	P421_12320		NP_003353.1	Homo sapiens		Uracil-DNA glycosylase, family 1 (EC 3.2.2.27)				71	95	52	0
K-mer Search	Antibiotic Resistance	PATRIC	Bacillus coagulans P38	fig|1398086.3.peg.1232	P421_05435					Two-component sensor histidine kinase BceS		regulator modulating expression of antibiotic resistance genes	25118291
BLAT	Transporter	TCDB	Bacillus coagulans P38	fig|1398086.3.peg.1133	P421_05015		P95827	Streptococcus pyogenes, and Streptococcus pneumoniae'		Macrolide resistance, MFS efflux pump => Mef(A)	the major facilitator superfamily (mfs).	2.A.1.21.1	12959402;14673771;8971709	89	100	94	1e-193
BLAT	Transporter	TCDB	Bacillus coagulans P38	fig|1398086.3.peg.86	P421_00415		G4NXA5	Bacillus subtilis subsp. spizizenii TU-B-10		Chaperone protein DnaK	the cation channel-forming heat shock protein-70 (hsp70) family.	1.A.33.1.4		95	95	85	1e-288
BLAT	Drug Target	DrugBank	Bacillus coagulans P38	fig|1398086.3.peg.2042	P421_09050		Q5KUI3	Geobacillus kaustophilus (strain HTA426)		Uracil phosphoribosyltransferase (EC 2.4.2.9)	Uridine-5'-Monophosphate	Drug target		97	97	83	3e-99
K-mer Search	Antibiotic Resistance	PATRIC	Bacillus coagulans P38	fig|1398086.3.peg.212	P421_00975					Glycerophosphoryl diester phosphodiesterase (EC 3.1.4.46)		protein altering cell wall charge conferring antibiotic resistance	21899450
BLASTP	Human Homolog	Human	Bacillus coagulans P38	fig|1398086.3.peg.3234	P421_14255		NP_001966.1	Homo sapiens		Enolase (EC 4.2.1.11)				97	97	52	3e-149
K-mer Search	Antibiotic Resistance	PATRIC	Bacillus coagulans P38	fig|1398086.3.peg.3099	P421_13640					Undecaprenyl-diphosphatase BcrC (EC 3.6.1.27), conveys bacitracin resistance		antibiotic target protection protein	12486040;15778224;15946938
K-mer Search	Antibiotic Resistance	PATRIC	Bacillus coagulans P38	fig|1398086.3.peg.1230	P421_05425					Bacitracin export permease protein BceB		efflux pump conferring antibiotic resistance	25118291
K-mer Search	Antibiotic Resistance	PATRIC	Bacillus coagulans P38	fig|1398086.3.peg.3035	P421_13360					Broad-specificity multidrug efflux pump YkkC		efflux pump conferring antibiotic resistance	10735877
BLAT	Drug Target	DrugBank	Bacillus coagulans P38	fig|1398086.3.peg.2044	P421_09060		Q5KUI2	Geobacillus kaustophilus (strain HTA426)		Serine hydroxymethyltransferase (EC 2.1.2.1)	(6R)-Folinic acid	Drug target		98	97	82	1e-195
BLASTP	Human Homolog	Human	Bacillus coagulans P38	fig|1398086.3.peg.2875	P421_12675		XP_005246575.1	Homo sapiens		Heat shock protein 60 kDa family chaperone GroEL				91	96	52	0
BLASTP	Human Homolog	Human	Bacillus coagulans P38	fig|1398086.3.peg.1819	P421_08130		NP_001776.1	Homo sapiens		Cytidine deaminase (EC 3.5.4.5)				87	98	51	4e-36
BLAT	Transporter	TCDB	Bacillus coagulans P38	fig|1398086.3.peg.467	P421_02090		Q01465	Bacillus subtilis (strain 168)		Rod shape-determining protein MreB	the cell shape-determining mrebcd (mrebcd) family.	9.B.157.1.1		97	97	83	1e-153
BLASTP	Human Homolog	Human	Bacillus coagulans P38	fig|1398086.3.peg.893	P421_03970		XP_006717934.1	Homo sapiens		Ornithine aminotransferase (EC 2.6.1.13)				89	96	50	1e-138
BLASTP	Human Homolog	Human	Bacillus coagulans P38	fig|1398086.3.peg.502	P421_02255		NP_006651.2	Homo sapiens		ATP-dependent Clp protease ATP-binding subunit ClpX				51	72	52	0
BLASTP	Human Homolog	Human	Bacillus coagulans P38	fig|1398086.3.peg.3050	P421_13425		NP_079523.3	Homo sapiens		Acyl-CoA dehydrogenase				37	95	59	0
BLAT	Transporter	TCDB	Bacillus coagulans P38	fig|1398086.3.peg.2135	P421_09465		P26904	Bacillus subtilis		Dipeptide ABC transporter, permease protein DppC (TC 3.A.1.5.2)	the atp-binding cassette (abc) superfamily.	3.A.1.5.2	11069674;11473256;1766370;19383706;3145906;9384377	89	89	80	1e-135
BLASTP	Human Homolog	Human	Bacillus coagulans P38	fig|1398086.3.peg.2390	P421_10535		XP_006713279.1	Homo sapiens		3-oxoacyl-[acyl-carrier-protein] synthase, KASII (EC 2.3.1.179)				90	98	50	0
BLASTP	Human Homolog	Human	Bacillus coagulans P38	fig|1398086.3.peg.856	P421_03810		NP_000681.2	Homo sapiens		Aldehyde dehydrogenase (EC 1.2.1.3)				92	95	55	0
K-mer Search	Antibiotic Resistance	PATRIC	Bacillus coagulans P38	fig|1398086.3.peg.818	P421_03635					Dihydrofolate reductase (EC 1.5.1.3)		antibiotic target in susceptible species	20169085;25288078
K-mer Search	Antibiotic Resistance	PATRIC	Bacillus coagulans P38	fig|1398086.3.peg.2496	P421_10975					weak similarity to aminoglycoside N(3)-acetyltransferase		antibiotic inactivation enzyme	;
BLASTP	Human Homolog	Human	Bacillus coagulans P38	fig|1398086.3.peg.131	P421_00605		NP_001019636.1	Homo sapiens		Superoxide dismutase [Mn] (EC 1.15.1.1)				88	99	52	0
BLASTP	Human Homolog	Human	Bacillus coagulans P38	fig|1398086.3.peg.2034	P421_09010		NP_001677.2	Homo sapiens		ATP synthase beta chain (EC 3.6.3.14)				87	98	68	0
BLASTP	Human Homolog	Human	Bacillus coagulans P38	fig|1398086.3.peg.315	P421_01415		NP_002504.2	Homo sapiens		Nucleoside diphosphate kinase (EC 2.7.4.6)				86	99	59	2e-62
K-mer Search	Antibiotic Resistance	PATRIC	Bacillus coagulans P38	fig|1398086.3.peg.723	P421_03220					1-deoxy-D-xylulose 5-phosphate reductoisomerase (EC 1.1.1.267)		antibiotic target in susceptible species	16321944
K-mer Search	Antibiotic Resistance	PATRIC	Bacillus coagulans P38	fig|1398086.3.peg.2029	P421_08990					UDP-N-acetylglucosamine 1-carboxyvinyltransferase (EC 2.5.1.7)		antibiotic target in susceptible species	8994972
BLASTP	Human Homolog	Human	Bacillus coagulans P38	fig|1398086.3.peg.2249	P421_09920		NP_001002756.1	Homo sapiens		NifU-like domain protein				67	96	50	5e-15
BLAT	Transporter	TCDB	Bacillus coagulans P38	fig|1398086.3.peg.190	P421_00870		P49780	Bacillus subtilis		Stage III sporulation protein AC	the multicomponent putative spoiiiae exporter (spoiiia-e) family.	9.B.70.1.1	1766372;19383706;8969508;9384377	98	100	83	8e-26
BLASTP	Human Homolog	Human	Bacillus coagulans P38	fig|1398086.3.peg.3101	P421_13645		NP_001743.1	Homo sapiens		Catalase KatE (EC 1.11.1.6)				89	95	51	2e-164
BLAT	Drug Target	DrugBank	Bacillus coagulans P38	fig|1398086.3.peg.3150	P421_13875		P96622	Bacillus subtilis (strain 168)		Programmed cell death toxin YdcE	2-(2-{2-[2-(2-Methoxy-Ethoxy)-Ethoxy]-Ethoxy}-Ethoxy)-Ethanol	Drug target		83	96	89	3e-43
BLASTP	Human Homolog	Human	Bacillus coagulans P38	fig|1398086.3.peg.3229	P421_14235		NP_002037.2	Homo sapiens		NAD-dependent glyceraldehyde-3-phosphate dehydrogenase (EC 1.2.1.12)				98	98	52	0
BLAT	Drug Target	DrugBank	Bacillus coagulans P38	fig|1398086.3.peg.3237	P421_14265		Q06174	Geobacillus stearothermophilus		Carboxylesterase (EC 3.1.1.1)	Propyl Acetate	Drug target		100	98	80	1e-119
BLAT	Virulence Factor	PATRIC_VF	Bacillus coagulans P38	fig|1398086.3.peg.1037	P421_04565		lmo0055	Listeria monocytogenes EGD-e		Adenylosuccinate synthetase (EC 6.3.4.4)		Intracellular survival and replication	20955543	99	99	83	1e-213
BLASTP	Human Homolog	Human	Bacillus coagulans P38	fig|1398086.3.peg.3323	P421_14655		NP_002622.2	Homo sapiens		6-phosphogluconate dehydrogenase, decarboxylating (EC 1.1.1.44)				97	99	57	0
K-mer Search	Antibiotic Resistance	PATRIC	Bacillus coagulans P38	fig|1398086.3.peg.1729	P421_07720					LSU ribosomal protein L6p (L9e)		antibiotic target in susceptible species	19289529;17923494
BLASTP	Human Homolog	Human	Bacillus coagulans P38	fig|1398086.3.peg.3058	P421_13460		NP_001071.1	Homo sapiens		Succinate-semialdehyde dehydrogenase [NAD(P)+] (EC 1.2.1.16)				87	98	54	0
BLAT	Transporter	TCDB	Bacillus coagulans P38	fig|1398086.3.peg.3565	P421_15710		Q45592	Bacillus subtilis		hypothetical protein	the atp-binding cassette (abc) superfamily.	3.A.1.133.1	15743949;17921301;9205843;9384377	85	85	80	1e-92
K-mer Search	Antibiotic Resistance	PATRIC	Bacillus coagulans P38	fig|1398086.3.peg.1131	P421_05005					Streptogramin O-acetyltransferase, putative		antibiotic inactivation enzyme	;
K-mer Search	Antibiotic Resistance	PATRIC	Bacillus coagulans P38	fig|1398086.3.peg.1231	P421_05430					Bacitracin export ATP-binding protein BceA		efflux pump conferring antibiotic resistance	25118291
BLASTP	Human Homolog	Human	Bacillus coagulans P38	fig|1398086.3.peg.2435	P421_10725		NP_542407.2	Homo sapiens		O-acetyl-ADP-ribose deacetylase				38	85	54	3e-48
BLAT	Transporter	TCDB	Bacillus coagulans P38	fig|1398086.3.peg.528	P421_02370		Q65GF5	Bacillus licheniformis (strain DSM 13 / ATCC 14580)		Succinate dehydrogenase iron-sulfur protein (EC 1.3.5.1)	the prokaryotic succinate dehydrogenase (sdh) family.	3.D.10.1.1	15383718;15461803	99	99	81	1e-128
BLAT	Drug Target	DrugBank	Bacillus coagulans P38	fig|1398086.3.peg.3229	P421_14235		P00362	Geobacillus stearothermophilus		NAD-dependent glyceraldehyde-3-phosphate dehydrogenase (EC 1.2.1.12)	Glyceraldehyde-3-Phosphate	Drug target		100	100	84	1e-160
K-mer Search	Antibiotic Resistance	PATRIC	Bacillus coagulans P38	fig|1398086.3.peg.1712	P421_07635					Translation elongation factor Tu		antibiotic target in susceptible species	364475;9678602
BLAT	Drug Target	DrugBank	Bacillus coagulans P38	fig|1398086.3.peg.600	P421_02685		P39126	Bacillus subtilis (strain 168)		Isocitrate dehydrogenase [NADP] (EC 1.1.1.42)	(R)-Propylene glycol;Citric Acid;S-1,2-Propanediol;S,S-(2-Hydroxyethyl)Thiocysteine'	Drug target		99	99	89	1e-222
BLASTP	Human Homolog	Human	Bacillus coagulans P38	fig|1398086.3.peg.1936	P421_08620		NP_000134.2	Homo sapiens		Fumarate hydratase class II (EC 4.2.1.2)				89	98	59	0
BLAT	Drug Target	TTD	Bacillus coagulans P38	fig|1398086.3.peg.1712	P421_07635		TTDI02058			Translation elongation factor Tu				98	98	85	1e-197
BLAT	Antibiotic Resistance	NDARO	Bacillus coagulans P38	fig|1398086.3.peg.1133	P421_05015		WP_012102963.1	Clostridium kluyveri		Macrolide resistance, MFS efflux pump => Mef(A)	macrolide efflux MFS transporter Mef(A)			88	100	98	1e-200
BLASTP	Human Homolog	Human	Bacillus coagulans P38	fig|1398086.3.peg.1755	P421_07830		NP_005434.4	Homo sapiens		Adenylylsulfate kinase (EC 2.7.1.25)				32	99	52	2e-66
K-mer Search	Antibiotic Resistance	PATRIC	Bacillus coagulans P38	fig|1398086.3.peg.2356	P421_10380					Enoyl-[acyl-carrier-protein] reductase [NADH] (EC 1.3.1.9)		antibiotic target in susceptible species	18193820;10869170;8284673
BLASTP	Human Homolog	Human	Bacillus coagulans P38	fig|1398086.3.peg.2437	P421_10735		NP_004484.1	Homo sapiens		hypothetical protein				95	96	61	0
BLASTP	Human Homolog	Human	Bacillus coagulans P38	fig|1398086.3.peg.1257	P421_05550		XP_005251533.1	Homo sapiens		Aconitate hydratase (EC 4.2.1.3)				97	95	54	0
K-mer Search	Antibiotic Resistance	PATRIC	Bacillus coagulans P38	fig|1398086.3.peg.2683	P421_11825					Enoyl-[acyl-carrier-protein] reductase [NADPH] (EC 1.3.1.104), FabL		antibiotic target replacement protein	21185310
BLASTP	Human Homolog	Human	Bacillus coagulans P38	fig|1398086.3.peg.817	P421_03630		NP_001062.1	Homo sapiens		Thymidylate synthase (EC 2.1.1.45)				90	98	55	0
BLAT	Virulence Factor	PATRIC_VF	Bacillus coagulans P38	fig|1398086.3.peg.2719	P421_11990		LMOh7858_1898	Listeria monocytogenes serotype 4b str. H7858		Adenylosuccinate lyase (EC 4.3.2.2) @ SAICAR lyase (EC 4.3.2.2)		Virulence	22506772	91	90	83	1e-195
K-mer Search	Antibiotic Resistance	PATRIC	Bacillus coagulans P38	fig|1398086.3.peg.764	P421_03415					CDP-diacylglycerol--glycerol-3-phosphate 3-phosphatidyltransferase (EC 2.7.8.5)		protein altering cell wall charge conferring antibiotic resistance	22238576
BLAT	Virulence Factor	Victors	Bacillus coagulans P38	fig|1398086.3.peg.681	P421_03015		227813264	Bacillus anthracis str. CDC 684		GTP-sensing transcriptional pleiotropic repressor CodY			19651859	98	98	82	1e-115
K-mer Search	Antibiotic Resistance	PATRIC	Bacillus coagulans P38	fig|1398086.3.peg.1062	P421_04665					16S rRNA (guanine(527)-N(7))-methyltransferase (EC 2.1.1.170)		gene conferring resistance via absence	17238915
K-mer Search	Antibiotic Resistance	PATRIC	Bacillus coagulans P38	fig|1398086.3.peg.1713	P421_07640					SSU ribosomal protein S10p (S20e)		antibiotic target in susceptible species	26124155
BLAT	Drug Target	DrugBank	Bacillus coagulans P38	fig|1398086.3.peg.1267	P421_05590		Q59192	Bacillus subtilis (strain 168)		DNA topoisomerase IV subunit B (EC 5.99.1.3)	Ciprofloxacin	Drug target		83	83	83	1e-272
BLASTP	Human Homolog	Human	Bacillus coagulans P38	fig|1398086.3.peg.2036	P421_09020		NP_001001937.1	Homo sapiens		ATP synthase alpha chain (EC 3.6.3.14)				91	98	58	0
K-mer Search	Antibiotic Resistance	PATRIC	Bacillus coagulans P38	fig|1398086.3.peg.1706	P421_07605					DNA-directed RNA polymerase beta subunit (EC 2.7.7.6)		antibiotic target in susceptible species	3050121;15047531;16723576
K-mer Search	Antibiotic Resistance	PATRIC	Bacillus coagulans P38	fig|1398086.3.peg.2061	P421_09140					UDP-N-acetylglucosamine 1-carboxyvinyltransferase (EC 2.5.1.7)		antibiotic target in susceptible species	8994972
K-mer Search	Antibiotic Resistance	PATRIC	Bacillus coagulans P38	fig|1398086.3.peg.1711	P421_07630					Translation elongation factor G		antibiotic target in susceptible species	17980694;19289529;19289529;17325218;19289529
K-mer Search	Antibiotic Resistance	PATRIC	Bacillus coagulans P38	fig|1398086.3.peg.1707	P421_07610					DNA-directed RNA polymerase beta' subunit (EC 2.7.7.6)		antibiotic target in susceptible species	16723576
BLASTP	Human Homolog	Human	Bacillus coagulans P38	fig|1398086.3.peg.855	P421_03805		NP_001924.2	Homo sapiens		Dihydrolipoamide succinyltransferase component (E2) of 2-oxoglutarate dehydrogenase complex (EC 2.3.1.61)				55	60	52	0
K-mer Search	Antibiotic Resistance	PATRIC	Bacillus coagulans P38	fig|1398086.3.peg.2963	P421_13060					Dihydropteroate synthase (EC 2.5.1.15)		antibiotic target in susceptible species	15673783
BLASTP	Human Homolog	Human	Bacillus coagulans P38	fig|1398086.3.peg.2713	P421_11960		XP_006724053.1	Homo sapiens		Phosphoribosylformylglycinamidine cyclo-ligase (EC 6.3.3.1)				33	95	50	3e-104
K-mer Search	Antibiotic Resistance	PATRIC	Bacillus coagulans P38	fig|1398086.3.peg.1076	P421_04730					DNA gyrase subunit B (EC 5.99.1.3)		antibiotic target in susceptible species	21693461;22279180;9293187
BLASTP	Human Homolog	Human	Bacillus coagulans P38	fig|1398086.3.peg.2769	P421_12215		NP_000008.1	Homo sapiens		Acyl-CoA dehydrogenase, short-chain specific (EC 1.3.8.1)				91	98	52	1e-132
BLAT	Transporter	TCDB	Bacillus coagulans P38	fig|1398086.3.peg.1977	P421_08780		E1UCI2	Listeria monocytogenes serotype 4a (strain L99)		PTS system, mannose-specific IID component	the pts mannose-fructose-sorbose (man) family.	4.A.6.1.15		97	97	81	1e-146
K-mer Search	Antibiotic Resistance	PATRIC	Bacillus coagulans XZL4	fig|1071395.3.peg.1301		VBIBacCoa206859_1301				Bacitracin export ATP-binding protein BceA		efflux pump conferring antibiotic resistance	25118291
BLAT	Drug Target	TTD	Bacillus coagulans XZL4	fig|1071395.3.peg.2745		VBIBacCoa206859_2745	TTDI02058			Translation elongation factor Tu				98	98	85	1e-196
BLASTP	Human Homolog	Human	Bacillus coagulans XZL4	fig|1071395.3.peg.2707		VBIBacCoa206859_2707	NP_005434.4	Homo sapiens		Adenylylsulfate kinase (EC 2.7.1.25)				32	97	52	6e-67
BLAT	Virulence Factor	Victors	Bacillus coagulans XZL4	fig|1071395.3.peg.708		VBIBacCoa206859_0708	227817253	Bacillus anthracis str. CDC 684		ATP-dependent Clp protease ATP-binding subunit ClpX			20375606	98	97	85	1e-203
BLAT	Drug Target	DrugBank	Bacillus coagulans XZL4	fig|1071395.3.peg.960		VBIBacCoa206859_0960	Q5KUI3	Geobacillus kaustophilus (strain HTA426)		Uracil phosphoribosyltransferase (EC 2.4.2.9)	Uridine-5'-Monophosphate	Drug target		97	97	83	9e-99
BLAT	Transporter	TCDB	Bacillus coagulans XZL4	fig|1071395.3.peg.468		VBIBacCoa206859_0468	Q65GF4	Bacillus licheniformis (strain DSM 13 / ATCC 14580)		Succinate dehydrogenase flavoprotein subunit (EC 1.3.5.1)	the prokaryotic succinate dehydrogenase (sdh) family.	3.D.10.1.1	15383718;15461803	93	94	85	1e-288
BLASTP	Human Homolog	Human	Bacillus coagulans XZL4	fig|1071395.3.peg.480		VBIBacCoa206859_0480	XP_005246575.1	Homo sapiens		Heat shock protein 60 kDa family chaperone GroEL				91	96	52	0
BLASTP	Human Homolog	Human	Bacillus coagulans XZL4	fig|1071395.3.peg.2837		VBIBacCoa206859_2837	NP_001180241.1	Homo sapiens		L-carnitine dehydratase/bile acid-inducible protein F				19	52	65	4e-27
K-mer Search	Antibiotic Resistance	PATRIC	Bacillus coagulans XZL4	fig|1071395.3.peg.1657		VBIBacCoa206859_1657				Undecaprenyl-diphosphatase BcrC (EC 3.6.1.27), conveys bacitracin resistance		antibiotic target protection protein	12486040;15778224;15946938
BLASTP	Human Homolog	Human	Bacillus coagulans XZL4	fig|1071395.3.peg.708		VBIBacCoa206859_0708	NP_006651.2	Homo sapiens		ATP-dependent Clp protease ATP-binding subunit ClpX				51	72	52	1e-101
BLASTP	Human Homolog	Human	Bacillus coagulans XZL4	fig|1071395.3.peg.114		VBIBacCoa206859_0114	NP_068746.2	Homo sapiens		Translation elongation factor LepA				91	98	50	0
BLASTP	Human Homolog	Human	Bacillus coagulans XZL4	fig|1071395.3.peg.1245		VBIBacCoa206859_1245	NP_000681.2	Homo sapiens		Aldehyde dehydrogenase (EC 1.2.1.3)				92	95	55	0
K-mer Search	Antibiotic Resistance	PATRIC	Bacillus coagulans XZL4	fig|1071395.3.peg.2744		VBIBacCoa206859_2744				SSU ribosomal protein S10p (S20e)		antibiotic target in susceptible species	26124155
BLASTP	Human Homolog	Human	Bacillus coagulans XZL4	fig|1071395.3.peg.1490		VBIBacCoa206859_1490	NP_542407.2	Homo sapiens		O-acetyl-ADP-ribose deacetylase				38	84	52	6e-46
K-mer Search	Antibiotic Resistance	PATRIC	Bacillus coagulans XZL4	fig|1071395.3.peg.1576		VBIBacCoa206859_1576				DNA gyrase subunit B (EC 5.99.1.3)		antibiotic target in susceptible species	21693461;22279180;9293187
BLAT	Drug Target	DrugBank	Bacillus coagulans XZL4	fig|1071395.3.peg.2307		VBIBacCoa206859_2307	P25553	Escherichia coli (strain K12)		Aldehyde dehydrogenase A (EC 1.2.1.22) @ Glycolaldehyde dehydrogenase (EC 1.2.1.21)	Deoxycholic Acid	Drug target		10	84	83	1e-18
K-mer Search	Antibiotic Resistance	PATRIC	Bacillus coagulans XZL4	fig|1071395.3.peg.2745		VBIBacCoa206859_2745				Translation elongation factor Tu		antibiotic target in susceptible species	364475;9678602
BLASTP	Human Homolog	Human	Bacillus coagulans XZL4	fig|1071395.3.peg.1211		VBIBacCoa206859_1211	NP_001062.1	Homo sapiens		Thymidylate synthase (EC 2.1.1.45)				90	98	55	1e-105
K-mer Search	Antibiotic Resistance	PATRIC	Bacillus coagulans XZL4	fig|1071395.3.peg.2384		VBIBacCoa206859_2384				Enoyl-[acyl-carrier-protein] reductase [NADH] (EC 1.3.1.9)		antibiotic target in susceptible species	18193820;10869170;8284673
K-mer Search	Antibiotic Resistance	PATRIC	Bacillus coagulans XZL4	fig|1071395.3.peg.2751		VBIBacCoa206859_2751				DNA-directed RNA polymerase beta' subunit (EC 2.7.7.6)		antibiotic target in susceptible species	16723576
BLASTP	Human Homolog	Human	Bacillus coagulans XZL4	fig|1071395.3.peg.2931		VBIBacCoa206859_2931	NP_001071.1	Homo sapiens		Succinate-semialdehyde dehydrogenase [NAD(P)+] (EC 1.2.1.16)				87	98	54	3e-162
BLASTP	Human Homolog	Human	Bacillus coagulans XZL4	fig|1071395.3.peg.291		VBIBacCoa206859_0291	XP_005269899.1	Homo sapiens		S-adenosylmethionine synthetase (EC 2.5.1.6)				94	95	59	4e-151
BLASTP	Human Homolog	Human	Bacillus coagulans XZL4	fig|1071395.3.peg.1981		VBIBacCoa206859_1981	NP_001776.1	Homo sapiens		Cytidine deaminase (EC 3.5.4.5)				87	98	51	2e-37
K-mer Search	Antibiotic Resistance	PATRIC	Bacillus coagulans XZL4	fig|1071395.3.peg.2728		VBIBacCoa206859_2728				LSU ribosomal protein L6p (L9e)		antibiotic target in susceptible species	19289529;17923494
K-mer Search	Antibiotic Resistance	PATRIC	Bacillus coagulans XZL4	fig|1071395.3.peg.3045		VBIBacCoa206859_3045				Glycerophosphoryl diester phosphodiesterase (EC 3.1.4.46)		protein altering cell wall charge conferring antibiotic resistance	21899450
BLASTP	Human Homolog	Human	Bacillus coagulans XZL4	fig|1071395.3.peg.2539		VBIBacCoa206859_2539	NP_001159585.1	Homo sapiens		hypothetical protein				2	63	66	2e-06
BLASTP	Human Homolog	Human	Bacillus coagulans XZL4	fig|1071395.3.peg.2665		VBIBacCoa206859_2665	NP_003840.2	Homo sapiens		Succinyl-CoA ligase [ADP-forming] alpha chain (EC 6.2.1.5)				85	97	61	1e-102
BLAT	Drug Target	DrugBank	Bacillus coagulans XZL4	fig|1071395.3.peg.1391		VBIBacCoa206859_1391	P00362	Geobacillus stearothermophilus		NAD-dependent glyceraldehyde-3-phosphate dehydrogenase (EC 1.2.1.12)	Glyceraldehyde-3-Phosphate	Drug target		100	100	84	1e-160
K-mer Search	Antibiotic Resistance	PATRIC	Bacillus coagulans XZL4	fig|1071395.3.peg.233		VBIBacCoa206859_0233				Glycerophosphoryl diester phosphodiesterase (EC 3.1.4.46)		protein altering cell wall charge conferring antibiotic resistance	21899450
BLASTP	Human Homolog	Human	Bacillus coagulans XZL4	fig|1071395.3.peg.2306		VBIBacCoa206859_2306	NP_001193826.1	Homo sapiens		Aldehyde dehydrogenase A (EC 1.2.1.22) @ Glycolaldehyde dehydrogenase (EC 1.2.1.21)				9	80	52	5e-10
K-mer Search	Antibiotic Resistance	PATRIC	Bacillus coagulans XZL4	fig|1071395.3.peg.903		VBIBacCoa206859_0903				Alanine racemase (EC 5.1.1.1)		antibiotic target in susceptible species	19748470;24303782
BLAT	Transporter	TCDB	Bacillus coagulans XZL4	fig|1071395.3.peg.807		VBIBacCoa206859_0807	P46912	Bacillus subtilis		Menaquinone-cytochrome c reductase, cytochrome B subunit	the proton-translocating quinol:cytochrome c reductase (qcr) superfamily.	3.D.3.4.1	7592464;8760912;9384377;9535866	100	100	89	1e-119
K-mer Search	Antibiotic Resistance	PATRIC	Bacillus coagulans XZL4	fig|1071395.3.peg.923		VBIBacCoa206859_0923				D-alanine--D-alanine ligase (EC 6.3.2.4)		antibiotic target in susceptible species	24303782;24033232
BLASTP	Human Homolog	Human	Bacillus coagulans XZL4	fig|1071395.3.peg.118		VBIBacCoa206859_0118	NP_004125.3	Homo sapiens		Chaperone protein DnaK				91	97	54	0
BLAT	Transporter	TCDB	Bacillus coagulans XZL4	fig|1071395.3.peg.209		VBIBacCoa206859_0209	P49780	Bacillus subtilis		Stage III sporulation protein AC	the multicomponent putative spoiiiae exporter (spoiiia-e) family.	9.B.70.1.1	1766372;19383706;8969508;9384377	98	100	83	8e-26
BLAT	Transporter	TCDB	Bacillus coagulans XZL4	fig|1071395.3.peg.118		VBIBacCoa206859_0118	G4NXA5	Bacillus subtilis subsp. spizizenii TU-B-10		Chaperone protein DnaK	the cation channel-forming heat shock protein-70 (hsp70) family.	1.A.33.1.4		95	95	85	1e-288
BLAT	Drug Target	DrugBank	Bacillus coagulans XZL4	fig|1071395.3.peg.405		VBIBacCoa206859_0405	P39126	Bacillus subtilis (strain 168)		Isocitrate dehydrogenase [NADP] (EC 1.1.1.42)	(R)-Propylene glycol;Citric Acid;S-1,2-Propanediol;S,S-(2-Hydroxyethyl)Thiocysteine'	Drug target		99	99	89	1e-222
BLAT	Drug Target	DrugBank	Bacillus coagulans XZL4	fig|1071395.3.peg.901		VBIBacCoa206859_0901	P96622	Bacillus subtilis (strain 168)		Programmed cell death toxin YdcE	2-(2-{2-[2-(2-Methoxy-Ethoxy)-Ethoxy]-Ethoxy}-Ethoxy)-Ethanol	Drug target		45	92	86	1e-18
K-mer Search	Antibiotic Resistance	PATRIC	Bacillus coagulans XZL4	fig|1071395.3.peg.1590		VBIBacCoa206859_1590				16S rRNA (guanine(527)-N(7))-methyltransferase (EC 2.1.1.170)		gene conferring resistance via absence	17238915
K-mer Search	Antibiotic Resistance	PATRIC	Bacillus coagulans XZL4	fig|1071395.3.peg.2782		VBIBacCoa206859_2782				Dihydropteroate synthase (EC 2.5.1.15)		antibiotic target in susceptible species	15673783
BLAT	Virulence Factor	PATRIC_VF	Bacillus coagulans XZL4	fig|1071395.3.peg.2058		VBIBacCoa206859_2058	LMOh7858_1898	Listeria monocytogenes serotype 4b str. H7858		Adenylosuccinate lyase (EC 4.3.2.2) @ SAICAR lyase (EC 4.3.2.2)		Virulence	22506772	91	90	83	1e-194
K-mer Search	Antibiotic Resistance	PATRIC	Bacillus coagulans XZL4	fig|1071395.3.peg.1125		VBIBacCoa206859_1125				1-deoxy-D-xylulose 5-phosphate reductoisomerase (EC 1.1.1.267)		antibiotic target in susceptible species	16321944
BLASTP	Human Homolog	Human	Bacillus coagulans XZL4	fig|1071395.3.peg.1327		VBIBacCoa206859_1327	XP_005251533.1	Homo sapiens		Aconitate hydratase (EC 4.2.1.3)				97	96	55	0
BLASTP	Human Homolog	Human	Bacillus coagulans XZL4	fig|1071395.3.peg.163		VBIBacCoa206859_0163	NP_001019636.1	Homo sapiens		Superoxide dismutase [Mn] (EC 1.15.1.1)				88	99	52	3e-68
K-mer Search	Antibiotic Resistance	PATRIC	Bacillus coagulans XZL4	fig|1071395.3.peg.2752		VBIBacCoa206859_2752				DNA-directed RNA polymerase beta subunit (EC 2.7.7.6)		antibiotic target in susceptible species	3050121;15047531;16723576
BLAT	Virulence Factor	Victors	Bacillus coagulans XZL4	fig|1071395.3.peg.2675		VBIBacCoa206859_2675	227813264	Bacillus anthracis str. CDC 684		GTP-sensing transcriptional pleiotropic repressor CodY			19651859	98	98	82	1e-115
BLASTP	Human Homolog	Human	Bacillus coagulans XZL4	fig|1071395.3.peg.217		VBIBacCoa206859_0217	XP_005254116.1	Homo sapiens		Biotin carboxylase of acetyl-CoA carboxylase (EC 6.3.4.14)				68	97	50	5e-150
BLASTP	Human Homolog	Human	Bacillus coagulans XZL4	fig|1071395.3.peg.951		VBIBacCoa206859_0951	NP_001677.2	Homo sapiens		ATP synthase beta chain (EC 3.6.3.14)				87	98	67	0
K-mer Search	Antibiotic Resistance	PATRIC	Bacillus coagulans XZL4	fig|1071395.3.peg.2749		VBIBacCoa206859_2749				SSU ribosomal protein S12p (S23e)		antibiotic target in susceptible species	7934937
BLASTP	Human Homolog	Human	Bacillus coagulans XZL4	fig|1071395.3.peg.2052		VBIBacCoa206859_2052	XP_006724053.1	Homo sapiens		Phosphoribosylformylglycinamidine cyclo-ligase (EC 6.3.3.1)				33	95	50	3e-105
BLASTP	Human Homolog	Human	Bacillus coagulans XZL4	fig|1071395.3.peg.953		VBIBacCoa206859_0953	NP_001001937.1	Homo sapiens		ATP synthase alpha chain (EC 3.6.3.14)				91	98	58	0
BLAT	Drug Target	DrugBank	Bacillus coagulans XZL4	fig|1071395.3.peg.961		VBIBacCoa206859_0961	Q5KUI2	Geobacillus kaustophilus (strain HTA426)		Serine hydroxymethyltransferase (EC 2.1.2.1)	(6R)-Folinic acid	Drug target		98	97	81	1e-195
K-mer Search	Antibiotic Resistance	PATRIC	Bacillus coagulans XZL4	fig|1071395.3.peg.1300		VBIBacCoa206859_1300				Bacitracin export permease protein BceB		efflux pump conferring antibiotic resistance	25118291
BLASTP	Human Homolog	Human	Bacillus coagulans XZL4	fig|1071395.3.peg.2257		VBIBacCoa206859_2257	NP_006003.1	Homo sapiens		ATP-dependent Clp protease proteolytic subunit ClpP (EC 3.4.21.92)				68	96	56	7e-74
K-mer Search	Antibiotic Resistance	PATRIC	Bacillus coagulans XZL4	fig|1071395.3.peg.1212		VBIBacCoa206859_1212				Dihydrofolate reductase (EC 1.5.1.3)		antibiotic target in susceptible species	20169085;25288078
K-mer Search	Antibiotic Resistance	PATRIC	Bacillus coagulans XZL4	fig|1071395.3.peg.2346		VBIBacCoa206859_2346				3-oxoacyl-[acyl-carrier-protein] synthase, KASII (EC 2.3.1.179)		antibiotic target in susceptible species	10428945
BLASTP	Human Homolog	Human	Bacillus coagulans XZL4	fig|1071395.3.peg.1492		VBIBacCoa206859_1492	NP_004484.1	Homo sapiens		hypothetical protein				95	96	61	1e-99
BLAT	Virulence Factor	PATRIC_VF	Bacillus coagulans XZL4	fig|1071395.3.peg.1615		VBIBacCoa206859_1615	lmo0055	Listeria monocytogenes EGD-e		Adenylosuccinate synthetase (EC 6.3.4.4)		Intracellular survival and replication	20955543	99	99	83	1e-213
K-mer Search	Antibiotic Resistance	PATRIC	Bacillus coagulans XZL4	fig|1071395.3.peg.1303		VBIBacCoa206859_1303				Two-component response regulator BceR		regulator modulating expression of antibiotic resistance genes	25118291
BLASTP	Human Homolog	Human	Bacillus coagulans XZL4	fig|1071395.3.peg.1244		VBIBacCoa206859_1244	NP_001924.2	Homo sapiens		Dihydrolipoamide succinyltransferase component (E2) of 2-oxoglutarate dehydrogenase complex (EC 2.3.1.61)				55	59	53	1e-83
BLAT	Transporter	TCDB	Bacillus coagulans XZL4	fig|1071395.3.peg.470		VBIBacCoa206859_0470	Q65GF5	Bacillus licheniformis (strain DSM 13 / ATCC 14580)		Succinate dehydrogenase iron-sulfur protein (EC 1.3.5.1)	the prokaryotic succinate dehydrogenase (sdh) family.	3.D.10.1.1	15383718;15461803	99	99	81	1e-128
BLASTP	Human Homolog	Human	Bacillus coagulans XZL4	fig|1071395.3.peg.821		VBIBacCoa206859_0821	NP_002504.2	Homo sapiens		Nucleoside diphosphate kinase (EC 2.7.4.6)				86	99	59	1e-62
K-mer Search	Antibiotic Resistance	PATRIC	Bacillus coagulans XZL4	fig|1071395.3.peg.2953		VBIBacCoa206859_2953				Broad-specificity multidrug efflux pump YkkC		efflux pump conferring antibiotic resistance	10735877
K-mer Search	Antibiotic Resistance	PATRIC	Bacillus coagulans XZL4	fig|1071395.3.peg.2746		VBIBacCoa206859_2746				Translation elongation factor G		antibiotic target in susceptible species	17980694;19289529;19289529;17325218;19289529
BLASTP	Human Homolog	Human	Bacillus coagulans XZL4	fig|1071395.3.peg.1015		VBIBacCoa206859_1015	NP_005882.2	Homo sapiens		3-ketoacyl-CoA thiolase (EC 2.3.1.16) @ Acetyl-CoA acetyltransferase (EC 2.3.1.9)				97	98	53	4e-140
BLASTP	Human Homolog	Human	Bacillus coagulans XZL4	fig|1071395.3.peg.1564		VBIBacCoa206859_1564	XP_006712164.1	Homo sapiens		Carbamoyl-phosphate synthase small chain (EC 6.3.5.5)				5	88	52	2e-32
BLASTP	Human Homolog	Human	Bacillus coagulans XZL4	fig|1071395.3.peg.1715		VBIBacCoa206859_1715	XP_005248532.1	Homo sapiens		Peptidyl-prolyl cis-trans isomerase (EC 5.2.1.8)				47	89	53	3e-51
BLAT	Drug Target	DrugBank	Bacillus coagulans XZL4	fig|1071395.3.peg.1384		VBIBacCoa206859_1384	Q06174	Geobacillus stearothermophilus		Carboxylesterase (EC 3.1.1.1)	Propyl Acetate	Drug target		100	98	80	1e-120
K-mer Search	Antibiotic Resistance	PATRIC	Bacillus coagulans XZL4	fig|1071395.3.peg.947		VBIBacCoa206859_0947				UDP-N-acetylglucosamine 1-carboxyvinyltransferase (EC 2.5.1.7)		antibiotic target in susceptible species	8994972
K-mer Search	Antibiotic Resistance	PATRIC	Bacillus coagulans XZL4	fig|1071395.3.peg.974		VBIBacCoa206859_0974				Transcription termination factor Rho		antibiotic target in susceptible species	8466900
BLASTP	Human Homolog	Human	Bacillus coagulans XZL4	fig|1071395.3.peg.1391		VBIBacCoa206859_1391	NP_002037.2	Homo sapiens		NAD-dependent glyceraldehyde-3-phosphate dehydrogenase (EC 1.2.1.12)				98	98	53	4e-118
K-mer Search	Antibiotic Resistance	PATRIC	Bacillus coagulans XZL4	fig|1071395.3.peg.1302		VBIBacCoa206859_1302				Two-component sensor histidine kinase BceS		regulator modulating expression of antibiotic resistance genes	25118291
BLASTP	Human Homolog	Human	Bacillus coagulans XZL4	fig|1071395.3.peg.2938		VBIBacCoa206859_2938	NP_079523.3	Homo sapiens		Acyl-CoA dehydrogenase				37	95	60	2e-168
BLASTP	Human Homolog	Human	Bacillus coagulans XZL4	fig|1071395.3.peg.1658		VBIBacCoa206859_1658	NP_001743.1	Homo sapiens		Catalase KatE (EC 1.11.1.6)				89	95	51	9e-165
K-mer Search	Antibiotic Resistance	PATRIC	Bacillus coagulans XZL4	fig|1071395.3.peg.1901		VBIBacCoa206859_1901				Enoyl-[acyl-carrier-protein] reductase [NADPH] (EC 1.3.1.104), FabL		antibiotic target replacement protein	21185310
BLASTP	Human Homolog	Human	Bacillus coagulans XZL4	fig|1071395.3.peg.743		VBIBacCoa206859_0743	NP_550433.1	Homo sapiens		Uracil-DNA glycosylase, family 1 (EC 3.2.2.27)				69	95	51	6e-70
BLASTP	Human Homolog	Human	Bacillus coagulans XZL4	fig|1071395.3.peg.1534		VBIBacCoa206859_1534	NP_002622.2	Homo sapiens		6-phosphogluconate dehydrogenase, decarboxylating (EC 1.1.1.44)				97	99	57	0
BLASTP	Human Homolog	Human	Bacillus coagulans XZL4	fig|1071395.3.peg.1386		VBIBacCoa206859_1386	NP_001966.1	Homo sapiens		Enolase (EC 4.2.1.11)				97	97	52	5e-149
K-mer Search	Antibiotic Resistance	PATRIC	Bacillus coagulans XZL4	fig|1071395.3.peg.3170		VBIBacCoa206859_3170				weak similarity to aminoglycoside N(3)-acetyltransferase		antibiotic inactivation enzyme	;
BLAT	Transporter	TCDB	Bacillus coagulans XZL4	fig|1071395.3.peg.1415		VBIBacCoa206859_1415	P26904	Bacillus subtilis		Dipeptide ABC transporter, permease protein DppC (TC 3.A.1.5.2)	the atp-binding cassette (abc) superfamily.	3.A.1.5.2	11069674;11473256;1766370;19383706;3145906;9384377	89	89	80	1e-135
K-mer Search	Antibiotic Resistance	PATRIC	Bacillus coagulans XZL4	fig|1071395.3.peg.1164		VBIBacCoa206859_1164				CDP-diacylglycerol--glycerol-3-phosphate 3-phosphatidyltransferase (EC 2.7.8.5)		protein altering cell wall charge conferring antibiotic resistance	22238576
BLASTP	Human Homolog	Human	Bacillus coagulans XZL4	fig|1071395.3.peg.2261		VBIBacCoa206859_2261	NP_000134.2	Homo sapiens		Fumarate hydratase class II (EC 4.2.1.2)				89	98	59	0
BLASTP	Human Homolog	Human	Bacillus coagulans XZL4	fig|1071395.3.peg.2745		VBIBacCoa206859_2745	NP_003312.3	Homo sapiens		Translation elongation factor Tu				86	99	58	7e-167
K-mer Search	Antibiotic Resistance	PATRIC	Bacillus coagulans XZL4	fig|1071395.3.peg.2579		VBIBacCoa206859_2579				Isoleucyl-tRNA synthetase (EC 6.1.1.5)		antibiotic target in susceptible species	7929087
K-mer Search	Antibiotic Resistance	PATRIC	Bacillus coagulans XZL4	fig|1071395.3.peg.1575		VBIBacCoa206859_1575				DNA gyrase subunit A (EC 5.99.1.3)		antibiotic target in susceptible species	9293187
BLAT	Drug Target	DrugBank	Bacillus coagulans XZL4	fig|1071395.3.peg.1337		VBIBacCoa206859_1337	Q59192	Bacillus subtilis (strain 168)		DNA topoisomerase IV subunit B (EC 5.99.1.3)	Ciprofloxacin	Drug target		83	83	83	1e-272
K-mer Search	Antibiotic Resistance	PATRIC	Bacillus coagulans XZL4	fig|1071395.3.peg.976		VBIBacCoa206859_0976				UDP-N-acetylglucosamine 1-carboxyvinyltransferase (EC 2.5.1.7)		antibiotic target in susceptible species	8994972
BLASTP	Human Homolog	Human	Bacillus coagulans XZL4	fig|1071395.3.peg.994		VBIBacCoa206859_0994	NP_000008.1	Homo sapiens		Acyl-CoA dehydrogenase, short-chain specific (EC 1.3.8.1)				91	98	52	3e-133
BLASTP	Human Homolog	Human	Bacillus coagulans XZL9	fig|1245026.4.peg.1310		VBIBacCoa260223_1310	NP_001062.1	Homo sapiens		Thymidylate synthase (EC 2.1.1.45)				90	98	55	1e-104
BLASTP	Human Homolog	Human	Bacillus coagulans XZL9	fig|1245026.4.peg.2228		VBIBacCoa260223_2228	NP_002037.2	Homo sapiens		NAD-dependent glyceraldehyde-3-phosphate dehydrogenase (EC 1.2.1.12)				98	98	52	7e-118
K-mer Search	Antibiotic Resistance	PATRIC	Bacillus coagulans XZL9	fig|1245026.4.peg.2080		VBIBacCoa260223_2080				Translation elongation factor G		antibiotic target in susceptible species	17980694;19289529;19289529;17325218;19289529
BLASTP	Human Homolog	Human	Bacillus coagulans XZL9	fig|1245026.4.peg.1347		VBIBacCoa260223_1347	NP_001924.2	Homo sapiens		Dihydrolipoamide succinyltransferase component (E2) of 2-oxoglutarate dehydrogenase complex (EC 2.3.1.61)				55	58	52	4e-82
BLASTP	Human Homolog	Human	Bacillus coagulans XZL9	fig|1245026.4.peg.702		VBIBacCoa260223_0702	NP_002504.2	Homo sapiens		Nucleoside diphosphate kinase (EC 2.7.4.6)				86	99	59	9e-63
K-mer Search	Antibiotic Resistance	PATRIC	Bacillus coagulans XZL9	fig|1245026.4.peg.1135		VBIBacCoa260223_1135				DNA gyrase subunit A (EC 5.99.1.3)		antibiotic target in susceptible species	9293187
BLASTP	Human Homolog	Human	Bacillus coagulans XZL9	fig|1245026.4.peg.1153		VBIBacCoa260223_1153	XP_005246575.1	Homo sapiens		Heat shock protein 60 kDa family chaperone GroEL				91	96	52	0
K-mer Search	Antibiotic Resistance	PATRIC	Bacillus coagulans XZL9	fig|1245026.4.peg.2083		VBIBacCoa260223_2083				SSU ribosomal protein S12p (S23e)		antibiotic target in susceptible species	7934937
K-mer Search	Antibiotic Resistance	PATRIC	Bacillus coagulans XZL9	fig|1245026.4.peg.1400		VBIBacCoa260223_1400				Bacitracin export ATP-binding protein BceA		efflux pump conferring antibiotic resistance	25118291
BLAT	Drug Target	TTD	Bacillus coagulans XZL9	fig|1245026.4.peg.2079		VBIBacCoa260223_2079	TTDI02058			Translation elongation factor Tu				98	98	85	1e-197
BLASTP	Human Homolog	Human	Bacillus coagulans XZL9	fig|1245026.4.peg.1199		VBIBacCoa260223_1199	NP_001071.1	Homo sapiens		Succinate-semialdehyde dehydrogenase [NAD(P)+] (EC 1.2.1.16)				87	98	54	3e-162
BLAT	Drug Target	DrugBank	Bacillus coagulans XZL9	fig|1245026.4.peg.404		VBIBacCoa260223_0404	Q5KUI2	Geobacillus kaustophilus (strain HTA426)		Serine hydroxymethyltransferase (EC 2.1.2.1)	(6R)-Folinic acid	Drug target		98	97	82	1e-195
BLASTP	Human Homolog	Human	Bacillus coagulans XZL9	fig|1245026.4.peg.2079		VBIBacCoa260223_2079	NP_003312.3	Homo sapiens		Translation elongation factor Tu				85	98	58	4e-167
K-mer Search	Antibiotic Resistance	PATRIC	Bacillus coagulans XZL9	fig|1245026.4.peg.2382		VBIBacCoa260223_2382				Enoyl-[acyl-carrier-protein] reductase [NADPH] (EC 1.3.1.104), FabL		antibiotic target replacement protein	21185310
BLASTP	Human Homolog	Human	Bacillus coagulans XZL9	fig|1245026.4.peg.468		VBIBacCoa260223_0468	NP_550433.1	Homo sapiens		Uracil-DNA glycosylase, family 1 (EC 3.2.2.27)				69	95	51	6e-70
BLAT	Drug Target	DrugBank	Bacillus coagulans XZL9	fig|1245026.4.peg.402		VBIBacCoa260223_0402	Q5KUI3	Geobacillus kaustophilus (strain HTA426)		Uracil phosphoribosyltransferase (EC 2.4.2.9)	Uridine-5'-Monophosphate	Drug target		97	97	83	3e-99
K-mer Search	Antibiotic Resistance	PATRIC	Bacillus coagulans XZL9	fig|1245026.4.peg.1908		VBIBacCoa260223_1908				Alanine racemase (EC 5.1.1.1)		antibiotic target in susceptible species	19748470;24303782
K-mer Search	Antibiotic Resistance	PATRIC	Bacillus coagulans XZL9	fig|1245026.4.peg.2959		VBIBacCoa260223_2959				Enoyl-[acyl-carrier-protein] reductase [NADH] (EC 1.3.1.9)		antibiotic target in susceptible species	18193820;10869170;8284673
K-mer Search	Antibiotic Resistance	PATRIC	Bacillus coagulans XZL9	fig|1245026.4.peg.3655		VBIBacCoa260223_3655				Isoleucyl-tRNA synthetase (EC 6.1.1.5)		antibiotic target in susceptible species	7929087
BLAT	Transporter	TCDB	Bacillus coagulans XZL9	fig|1245026.4.peg.1787		VBIBacCoa260223_1787	Q01465	Bacillus subtilis (strain 168)		Rod shape-determining protein MreB	the cell shape-determining mrebcd (mrebcd) family.	9.B.157.1.1		97	97	84	1e-153
K-mer Search	Antibiotic Resistance	PATRIC	Bacillus coagulans XZL9	fig|1245026.4.peg.1402		VBIBacCoa260223_1402				Two-component response regulator BceR		regulator modulating expression of antibiotic resistance genes	25118291
BLASTP	Human Homolog	Human	Bacillus coagulans XZL9	fig|1245026.4.peg.233		VBIBacCoa260223_0233	NP_000134.2	Homo sapiens		Fumarate hydratase class II (EC 4.2.1.2)				89	98	59	0
BLASTP	Human Homolog	Human	Bacillus coagulans XZL9	fig|1245026.4.peg.396		VBIBacCoa260223_0396	NP_001001937.1	Homo sapiens		ATP synthase alpha chain (EC 3.6.3.14)				91	98	58	0
BLAT	Drug Target	DrugBank	Bacillus coagulans XZL9	fig|1245026.4.peg.1438		VBIBacCoa260223_1438	Q59192	Bacillus subtilis (strain 168)		DNA topoisomerase IV subunit B (EC 5.99.1.3)	Ciprofloxacin	Drug target		83	79	83	1e-272
BLASTP	Human Homolog	Human	Bacillus coagulans XZL9	fig|1245026.4.peg.1428		VBIBacCoa260223_1428	XP_005251533.1	Homo sapiens		Aconitate hydratase (EC 4.2.1.3)				97	95	54	0
K-mer Search	Antibiotic Resistance	PATRIC	Bacillus coagulans XZL9	fig|1245026.4.peg.2585		VBIBacCoa260223_2585				1-deoxy-D-xylulose 5-phosphate reductoisomerase (EC 1.1.1.267)		antibiotic target in susceptible species	16321944
BLASTP	Human Homolog	Human	Bacillus coagulans XZL9	fig|1245026.4.peg.394		VBIBacCoa260223_0394	NP_001677.2	Homo sapiens		ATP synthase beta chain (EC 3.6.3.14)				87	98	68	0
K-mer Search	Antibiotic Resistance	PATRIC	Bacillus coagulans XZL9	fig|1245026.4.peg.1224		VBIBacCoa260223_1224				Broad-specificity multidrug efflux pump YkkC		efflux pump conferring antibiotic resistance	10735877
BLAT	Transporter	TCDB	Bacillus coagulans XZL9	fig|1245026.4.peg.826		VBIBacCoa260223_0826	P49780	Bacillus subtilis		Stage III sporulation protein AC	the multicomponent putative spoiiiae exporter (spoiiia-e) family.	9.B.70.1.1	1766372;19383706;8969508;9384377	98	100	83	8e-26
BLASTP	Human Homolog	Human	Bacillus coagulans XZL9	fig|1245026.4.peg.535		VBIBacCoa260223_0535	XP_006723607.1	Homo sapiens		O-acetyl-ADP-ribose deacetylase				36	85	53	3e-47
BLASTP	Human Homolog	Human	Bacillus coagulans XZL9	fig|1245026.4.peg.1250		VBIBacCoa260223_1250	XP_006724051.1	Homo sapiens		Phosphoribosylformylglycinamidine cyclo-ligase (EC 6.3.3.1)				32	95	50	5e-104
K-mer Search	Antibiotic Resistance	PATRIC	Bacillus coagulans XZL9	fig|1245026.4.peg.2079		VBIBacCoa260223_2079				Translation elongation factor Tu		antibiotic target in susceptible species	364475;9678602
BLASTP	Human Homolog	Human	Bacillus coagulans XZL9	fig|1245026.4.peg.1348		VBIBacCoa260223_1348	NP_000681.2	Homo sapiens		Aldehyde dehydrogenase (EC 1.2.1.3)				92	95	55	0
K-mer Search	Antibiotic Resistance	PATRIC	Bacillus coagulans XZL9	fig|1245026.4.peg.1932		VBIBacCoa260223_1932				D-alanine--D-alanine ligase (EC 6.3.2.4)		antibiotic target in susceptible species	24303782;24033232
BLAT	Virulence Factor	Victors	Bacillus coagulans XZL9	fig|1245026.4.peg.2542		VBIBacCoa260223_2542	227813264	Bacillus anthracis str. CDC 684		GTP-sensing transcriptional pleiotropic repressor CodY			19651859	98	98	82	1e-115
BLASTP	Human Homolog	Human	Bacillus coagulans XZL9	fig|1245026.4.peg.1034		VBIBacCoa260223_1034	NP_005882.2	Homo sapiens		3-ketoacyl-CoA thiolase (EC 2.3.1.16) @ Acetyl-CoA acetyltransferase (EC 2.3.1.9)				97	98	53	4e-141
K-mer Search	Antibiotic Resistance	PATRIC	Bacillus coagulans XZL9	fig|1245026.4.peg.1453		VBIBacCoa260223_1453				Macrolide resistance, MFS efflux pump => Mef(A)		efflux pump conferring antibiotic resistance	10952626
K-mer Search	Antibiotic Resistance	PATRIC	Bacillus coagulans XZL9	fig|1245026.4.peg.804		VBIBacCoa260223_0804				Glycerophosphoryl diester phosphodiesterase (EC 3.1.4.46)		protein altering cell wall charge conferring antibiotic resistance	21899450
BLAT	Transporter	TCDB	Bacillus coagulans XZL9	fig|1245026.4.peg.688		VBIBacCoa260223_0688	P46912	Bacillus subtilis		Menaquinone-cytochrome c reductase, cytochrome B subunit	the proton-translocating quinol:cytochrome c reductase (qcr) superfamily.	3.D.3.4.1	7592464;8760912;9384377;9535866	100	100	89	1e-119
K-mer Search	Antibiotic Resistance	PATRIC	Bacillus coagulans XZL9	fig|1245026.4.peg.421		VBIBacCoa260223_0421				UDP-N-acetylglucosamine 1-carboxyvinyltransferase (EC 2.5.1.7)		antibiotic target in susceptible species	8994972
BLAT	Antibiotic Resistance	NDARO	Bacillus coagulans XZL9	fig|1245026.4.peg.1453		VBIBacCoa260223_1453	WP_012102963.1	Clostridium kluyveri		Macrolide resistance, MFS efflux pump => Mef(A)	macrolide efflux MFS transporter Mef(A)			88	100	98	1e-200
K-mer Search	Antibiotic Resistance	PATRIC	Bacillus coagulans XZL9	fig|1245026.4.peg.1457		VBIBacCoa260223_1457				Dihydropteroate synthase (EC 2.5.1.15)		antibiotic target in susceptible species	15673783
BLAT	Transporter	TCDB	Bacillus coagulans XZL9	fig|1245026.4.peg.3279		VBIBacCoa260223_3279	E1UCI2	Listeria monocytogenes serotype 4a (strain L99)		PTS system, mannose-specific IID component	the pts mannose-fructose-sorbose (man) family.	4.A.6.1.15		97	97	81	1e-146
BLAT	Drug Target	DrugBank	Bacillus coagulans XZL9	fig|1245026.4.peg.2228		VBIBacCoa260223_2228	P00362	Geobacillus stearothermophilus		NAD-dependent glyceraldehyde-3-phosphate dehydrogenase (EC 1.2.1.12)	Glyceraldehyde-3-Phosphate	Drug target		100	100	84	1e-160
BLASTP	Human Homolog	Human	Bacillus coagulans XZL9	fig|1245026.4.peg.3758		VBIBacCoa260223_3758	NP_001776.1	Homo sapiens		Cytidine deaminase (EC 3.5.4.5)				87	98	50	9e-36
K-mer Search	Antibiotic Resistance	PATRIC	Bacillus coagulans XZL9	fig|1245026.4.peg.2078		VBIBacCoa260223_2078				SSU ribosomal protein S10p (S20e)		antibiotic target in susceptible species	26124155
BLAT	Transporter	TCDB	Bacillus coagulans XZL9	fig|1245026.4.peg.1453		VBIBacCoa260223_1453	P95827	Streptococcus pyogenes, and Streptococcus pneumoniae'		Macrolide resistance, MFS efflux pump => Mef(A)	the major facilitator superfamily (mfs).	2.A.1.21.1	12959402;14673771;8971709	89	100	94	1e-193
BLASTP	Human Homolog	Human	Bacillus coagulans XZL9	fig|1245026.4.peg.2533		VBIBacCoa260223_2533	NP_003840.2	Homo sapiens		Succinyl-CoA ligase [ADP-forming] alpha chain (EC 6.2.1.5)				85	97	62	2e-105
K-mer Search	Antibiotic Resistance	PATRIC	Bacillus coagulans XZL9	fig|1245026.4.peg.2087		VBIBacCoa260223_2087				DNA-directed RNA polymerase beta subunit (EC 2.7.7.6)		antibiotic target in susceptible species	3050121;15047531;16723576
BLAT	Drug Target	DrugBank	Bacillus coagulans XZL9	fig|1245026.4.peg.2146		VBIBacCoa260223_2146	P39126	Bacillus subtilis (strain 168)		Isocitrate dehydrogenase [NADP] (EC 1.1.1.42)	(R)-Propylene glycol;Citric Acid;S-1,2-Propanediol;S,S-(2-Hydroxyethyl)Thiocysteine'	Drug target		99	99	89	1e-222
BLASTP	Human Homolog	Human	Bacillus coagulans XZL9	fig|1245026.4.peg.1822		VBIBacCoa260223_1822	NP_006651.2	Homo sapiens		ATP-dependent Clp protease ATP-binding subunit ClpX				51	72	52	2e-102
BLASTP	Human Homolog	Human	Bacillus coagulans XZL9	fig|1245026.4.peg.3132		VBIBacCoa260223_3132	XP_006713279.1	Homo sapiens		3-oxoacyl-[acyl-carrier-protein] synthase, KASII (EC 2.3.1.179)				90	98	50	3e-131
K-mer Search	Antibiotic Resistance	PATRIC	Bacillus coagulans XZL9	fig|1245026.4.peg.1121		VBIBacCoa260223_1121				16S rRNA (guanine(527)-N(7))-methyltransferase (EC 2.1.1.170)		gene conferring resistance via absence	17238915
K-mer Search	Antibiotic Resistance	PATRIC	Bacillus coagulans XZL9	fig|1245026.4.peg.3132		VBIBacCoa260223_3132				3-oxoacyl-[acyl-carrier-protein] synthase, KASII (EC 2.3.1.179)		antibiotic target in susceptible species	10428945
K-mer Search	Antibiotic Resistance	PATRIC	Bacillus coagulans XZL9	fig|1245026.4.peg.389		VBIBacCoa260223_0389				UDP-N-acetylglucosamine 1-carboxyvinyltransferase (EC 2.5.1.7)		antibiotic target in susceptible species	8994972
BLAT	Virulence Factor	PATRIC_VF	Bacillus coagulans XZL9	fig|1245026.4.peg.1244		VBIBacCoa260223_1244	LMOh7858_1898	Listeria monocytogenes serotype 4b str. H7858		Adenylosuccinate lyase (EC 4.3.2.2) @ SAICAR lyase (EC 4.3.2.2)		Virulence	22506772	91	90	83	1e-194
BLASTP	Human Homolog	Human	Bacillus coagulans XZL9	fig|1245026.4.peg.537		VBIBacCoa260223_0537	NP_004484.1	Homo sapiens		hypothetical protein				95	96	61	3e-99
BLAT	Virulence Factor	PATRIC_VF	Bacillus coagulans XZL9	fig|1245026.4.peg.1096		VBIBacCoa260223_1096	lmo0055	Listeria monocytogenes EGD-e		Adenylosuccinate synthetase (EC 6.3.4.4)		Intracellular survival and replication	20955543	99	99	83	1e-213
K-mer Search	Antibiotic Resistance	PATRIC	Bacillus coagulans XZL9	fig|1245026.4.peg.2086		VBIBacCoa260223_2086				DNA-directed RNA polymerase beta' subunit (EC 2.7.7.6)		antibiotic target in susceptible species	16723576
BLASTP	Human Homolog	Human	Bacillus coagulans XZL9	fig|1245026.4.peg.579		VBIBacCoa260223_0579	NP_002622.2	Homo sapiens		6-phosphogluconate dehydrogenase, decarboxylating (EC 1.1.1.44)				97	99	57	0
BLAT	Transporter	TCDB	Bacillus coagulans XZL9	fig|1245026.4.peg.2254		VBIBacCoa260223_2254	P26904	Bacillus subtilis		Dipeptide ABC transporter, permease protein DppC (TC 3.A.1.5.2)	the atp-binding cassette (abc) superfamily.	3.A.1.5.2	11069674;11473256;1766370;19383706;3145906;9384377	89	89	80	1e-135
BLAT	Antibiotic Resistance	CARD	Bacillus coagulans XZL9	fig|1245026.4.peg.1453		VBIBacCoa260223_1453	YP_008997285.1	Exiguobacterium sp. S3-2		Macrolide resistance, MFS efflux pump => Mef(A)		efflux pump conferring antibiotic resistance		89	100	89	1e-184
BLAT	Transporter	TCDB	Bacillus coagulans XZL9	fig|1245026.4.peg.1850		VBIBacCoa260223_1850	Q65GF5	Bacillus licheniformis (strain DSM 13 / ATCC 14580)		Succinate dehydrogenase iron-sulfur protein (EC 1.3.5.1)	the prokaryotic succinate dehydrogenase (sdh) family.	3.D.10.1.1	15383718;15461803	99	99	81	1e-128
BLASTP	Human Homolog	Human	Bacillus coagulans XZL9	fig|1245026.4.peg.818		VBIBacCoa260223_0818	XP_005254116.1	Homo sapiens		Biotin carboxylase of acetyl-CoA carboxylase (EC 6.3.4.14)				68	97	51	8e-151
K-mer Search	Antibiotic Resistance	PATRIC	Bacillus coagulans XZL9	fig|1245026.4.peg.1134		VBIBacCoa260223_1134				DNA gyrase subunit B (EC 5.99.1.3)		antibiotic target in susceptible species	21693461;22279180;9293187
BLASTP	Human Homolog	Human	Bacillus coagulans XZL9	fig|1245026.4.peg.245		VBIBacCoa260223_0245	XP_005269899.1	Homo sapiens		S-adenosylmethionine synthetase (EC 2.5.1.6)				94	95	58	1e-149
K-mer Search	Antibiotic Resistance	PATRIC	Bacillus coagulans XZL9	fig|1245026.4.peg.418		VBIBacCoa260223_0418				Transcription termination factor Rho		antibiotic target in susceptible species	8466900
BLASTP	Human Homolog	Human	Bacillus coagulans XZL9	fig|1245026.4.peg.2349		VBIBacCoa260223_2349	NP_057602.2	Homo sapiens		hypothetical protein				17	97	55	4e-17
K-mer Search	Antibiotic Resistance	PATRIC	Bacillus coagulans XZL9	fig|1245026.4.peg.1401		VBIBacCoa260223_1401				Two-component sensor histidine kinase BceS		regulator modulating expression of antibiotic resistance genes	25118291
K-mer Search	Antibiotic Resistance	PATRIC	Bacillus coagulans XZL9	fig|1245026.4.peg.2062		VBIBacCoa260223_2062				LSU ribosomal protein L6p (L9e)		antibiotic target in susceptible species	19289529;17923494
K-mer Search	Antibiotic Resistance	PATRIC	Bacillus coagulans XZL9	fig|1245026.4.peg.2872		VBIBacCoa260223_2872				Glycerophosphoryl diester phosphodiesterase (EC 3.1.4.46)		protein altering cell wall charge conferring antibiotic resistance	21899450
BLASTP	Human Homolog	Human	Bacillus coagulans XZL9	fig|1245026.4.peg.2223		VBIBacCoa260223_2223	NP_001966.1	Homo sapiens		Enolase (EC 4.2.1.11)				97	97	52	5e-149
BLASTP	Human Homolog	Human	Bacillus coagulans XZL9	fig|1245026.4.peg.3326		VBIBacCoa260223_3326	NP_001743.1	Homo sapiens		Catalase KatE (EC 1.11.1.6)				89	95	51	3e-166
K-mer Search	Antibiotic Resistance	PATRIC	Bacillus coagulans XZL9	fig|1245026.4.peg.3241		VBIBacCoa260223_3241				weak similarity to aminoglycoside N(3)-acetyltransferase		antibiotic inactivation enzyme	;
BLAT	Drug Target	DrugBank	Bacillus coagulans XZL9	fig|1245026.4.peg.1906		VBIBacCoa260223_1906	P96622	Bacillus subtilis (strain 168)		Programmed cell death toxin YdcE	2-(2-{2-[2-(2-Methoxy-Ethoxy)-Ethoxy]-Ethoxy}-Ethoxy)-Ethanol	Drug target		83	96	89	3e-43
BLASTP	Human Homolog	Human	Bacillus coagulans XZL9	fig|1245026.4.peg.439		VBIBacCoa260223_0439	NP_000008.1	Homo sapiens		Acyl-CoA dehydrogenase, short-chain specific (EC 1.3.8.1)				91	96	52	3e-133
K-mer Search	Antibiotic Resistance	PATRIC	Bacillus coagulans XZL9	fig|1245026.4.peg.2629		VBIBacCoa260223_2629				CDP-diacylglycerol--glycerol-3-phosphate 3-phosphatidyltransferase (EC 2.7.8.5)		protein altering cell wall charge conferring antibiotic resistance	22238576
K-mer Search	Antibiotic Resistance	PATRIC	Bacillus coagulans XZL9	fig|1245026.4.peg.1399		VBIBacCoa260223_1399				Bacitracin export permease protein BceB		efflux pump conferring antibiotic resistance	25118291
K-mer Search	Antibiotic Resistance	PATRIC	Bacillus coagulans XZL9	fig|1245026.4.peg.3324		VBIBacCoa260223_3324				Undecaprenyl-diphosphatase BcrC (EC 3.6.1.27), conveys bacitracin resistance		antibiotic target protection protein	12486040;15778224;15946938
K-mer Search	Antibiotic Resistance	PATRIC	Bacillus coagulans XZL9	fig|1245026.4.peg.3679		VBIBacCoa260223_3679				Lincomycin resistance, MFS efflux pump => Lmr(B)		efflux pump conferring antibiotic resistance	15317768
BLAT	Transporter	TCDB	Bacillus coagulans XZL9	fig|1245026.4.peg.926		VBIBacCoa260223_0926	G4NXA5	Bacillus subtilis subsp. spizizenii TU-B-10		Chaperone protein DnaK	the cation channel-forming heat shock protein-70 (hsp70) family.	1.A.33.1.4		95	95	85	1e-288
BLASTP	Human Homolog	Human	Bacillus coagulans XZL9	fig|1245026.4.peg.1208		VBIBacCoa260223_1208	NP_079523.3	Homo sapiens		Acyl-CoA dehydrogenase				37	95	59	4e-166
BLASTP	Human Homolog	Human	Bacillus coagulans XZL9	fig|1245026.4.peg.880		VBIBacCoa260223_0880	NP_001019636.1	Homo sapiens		Superoxide dismutase [Mn] (EC 1.15.1.1)				88	99	52	4e-69
BLASTP	Human Homolog	Human	Bacillus coagulans XZL9	fig|1245026.4.peg.2035		VBIBacCoa260223_2035	NP_005434.4	Homo sapiens		Adenylylsulfate kinase (EC 2.7.1.25)				32	99	52	7e-67
K-mer Search	Antibiotic Resistance	PATRIC	Bacillus coagulans XZL9	fig|1245026.4.peg.1311		VBIBacCoa260223_1311				Dihydrofolate reductase (EC 1.5.1.3)		antibiotic target in susceptible species	20169085;25288078
BLAT	Drug Target	DrugBank	Bacillus coagulans XZL9	fig|1245026.4.peg.2220		VBIBacCoa260223_2220	Q06174	Geobacillus stearothermophilus		Carboxylesterase (EC 3.1.1.1)	Propyl Acetate	Drug target		100	98	80	1e-120
BLASTP	Human Homolog	Human	Bacillus coagulans XZL9	fig|1245026.4.peg.2856		VBIBacCoa260223_2856	NP_006003.1	Homo sapiens		ATP-dependent Clp protease proteolytic subunit ClpP (EC 3.4.21.92)				68	96	56	7e-74
BLASTP	Human Homolog	Human	Bacillus coagulans XZL9	fig|1245026.4.peg.926		VBIBacCoa260223_0926	NP_004125.3	Homo sapiens		Chaperone protein DnaK				91	97	55	0
BLAT	Transporter	TCDB	Bacillus coagulans XZL9	fig|1245026.4.peg.1852		VBIBacCoa260223_1852	Q65GF4	Bacillus licheniformis (strain DSM 13 / ATCC 14580)		Succinate dehydrogenase flavoprotein subunit (EC 1.3.5.1)	the prokaryotic succinate dehydrogenase (sdh) family.	3.D.10.1.1	15383718;15461803	93	94	85	1e-288
