# Supplementary material for: A Genomic Comparative Analysis of Bacillus Coagulans Unravels the Genetic Potential of MA-13 Strain for Biotechnological Applications
Source: Preprints.org preprint supplement (doi:10.20944/preprints202112.0372.v1), 2021-12-22
Supplement: Supplementary file 6 [file Table S5.xlsx]

## Sheet: ST5
Table S5. Defense systems present in the B. coagulans strains
Strain_Contig	Source	Feature	Start	End	Score	Strand	Frame	Attribute
2-6_NC_015634.1	padloc	cbass_type_IIs	389812	390957	1.3e-164	-	.	Name=Effector;HMM.accession=PDLC00739;HMM.name=Effector_00077;Target.coverage=0.976;HMM.coverage=0.987;Alt=PDLC00739, Effector_00077, 1.3e-164, 0.976, 0.987 | PDLC01997, SAVED1--SAVED_HNH_MK_CARF_00012017, 2e-152, 0.974, 0.995 | PDLC00746, Effector_00084, 2.2e-106, 0.966, 0.956 | PDLC00749, Effector_00087, 3.7e-74, 0.966, 0.959 | PDLC01998, SAVED1--SAVED_HNH_MK_CARF_00011907, 3.7e-64, 0.969, 0.747
2-6_NC_015634.1	padloc	cbass_type_IIs	390995	391441	2.1e-56	-	.	Name=E2;HMM.accession=PDLC00876;HMM.name=E2_00019;Target.coverage=0.926;HMM.coverage=0.873;Alt=PDLC00876, E2_00019, 2.1e-56, 0.926, 0.873 | PDLC00864, E2_00007, 6.7e-45, 0.913, 0.922 | PDLC00863, E2_00006, 2.1e-44, 0.919, 0.946 | PDLC00877, E2_00020, 7.2e-42, 0.913, 0.96 | PDLC00873, E2_00016, 1.5e-37, 0.698, 0.964
2-6_NC_015634.1	padloc	cbass_type_IIs	391431	392564	1.6e-133	-	.	Name=Cyclase;HMM.accession=PDLC00815;HMM.name=Cyclase_00055;Target.coverage=0.989;HMM.coverage=0.99;Alt=PDLC00815, Cyclase_00055, 1.6e-133, 0.989, 0.99 | PDLC00816, Cyclase_00056, 2.4e-102, 0.915, 0.668 | PDLC00780, Cyclase_00020, 2.1e-98, 0.971, 0.974 | PDLC00770, Cyclase_00010, 7.9e-74, 0.915, 0.729 | PDLC00800, Cyclase_00040, 1.8e-59, 0.971, 0.955
2-6_NC_015634.1	padloc	wadjet_type_II	2428837	2430132	1.2e-148	-	.	Name=JetD2;HMM.accession=PDLC00556;HMM.name=JetD2_00002;Target.coverage=0.977;HMM.coverage=0.979;Alt=PDLC00556, JetD2_00002, 1.2e-148, 0.977, 0.979 | PDLC00557, JetD2_00003, 4.3e-56, 0.963, 0.967 | PDLC00555, JetD2_00001, 3.6e-19, 0.581, 0.551
2-6_NC_015634.1	padloc	wadjet_type_II	2430264	2434355	0	-	.	Name=JetC2;HMM.accession=PDLC00551;HMM.name=JetC2_00003;Target.coverage=0.992;HMM.coverage=0.993;Alt=PDLC00550, JetC2_00002, 0, 0.989, 0.994 | PDLC00551, JetC2_00003, 0, 0.992, 0.993 | PDLC00552, JetC2_00004, 2e-249, 0.988, 0.985 | PDLC00553, JetC2_00005, 9.8e-226, 0.99, 0.983 | PDLC00554, JetC2_00006, 1.1e-125, 0.271, 0.936
2-6_NC_015634.1	padloc	wadjet_type_II	2434373	2435536	3.3e-152	-	.	Name=JetB2;HMM.accession=PDLC00542;HMM.name=JetB2_00001;Target.coverage=0.974;HMM.coverage=0.985;Alt=PDLC00542, JetB2_00001, 3.3e-152, 0.974, 0.985 | PDLC00547, JetB2_00006, 2e-68, 0.943, 0.925 | PDLC00546, JetB2_00005, 7e-38, 0.925, 0.888 | PDLC00543, JetB2_00002, 9.1e-21, 0.905, 0.884 | PDLC00545, JetB2_00004, 8.6e-05, 0.549, 0.474
2-6_NC_015634.1	padloc	wadjet_type_II	2435652	2437130	3.4e-207	-	.	Name=JetA2;HMM.accession=PDLC00537;HMM.name=JetA2_00004;Target.coverage=0.988;HMM.coverage=0.978;Alt=PDLC00537, JetA2_00004, 3.4e-207, 0.988, 0.978 | PDLC00540, JetA2_00007, 1.1e-193, 0.99, 0.978 | PDLC00536, JetA2_00003, 1.6e-68, 0.97, 0.936 | PDLC00535, JetA2_00002, 5.8e-62, 0.974, 0.963 | PDLC00541, JetA2_00008, 5.8e-45, 0.972, 0.93
2-6_NC_015634.1	padloc	cas_type_I-B1	2503219	2503512	2.6e-33	-	.	Name=Cas2b;HMM.accession=PDLC01749;HMM.name=Cas2b_WP_014295803.1;Target.coverage=0.857;HMM.coverage=0.966;Alt=PDLC01749, Cas2b_WP_014295803.1, 2.6e-33, 0.857, 0.966 | PDLC02076, Cas2b_WP_066217071.1, 1.8e-23, 0.796, 0.897 | PDLC01750, Cas2b_WP_096389957.1, 1.8e-10, 0.786, 0.884 | PDLC02077, Cas2b_WP_028460064.1, 7e-10, 0.776, 0.812 | PDLC02078, Cas2b_WP_038071942.1, 2e-07, 0.612, 0.649
2-6_NC_015634.1	padloc	cas_type_I-B1	2503512	2504513	2.4e-133	-	.	Name=Cas1b;HMM.accession=PDLC01742;HMM.name=Cas1b_WP_142933338.1;Target.coverage=0.979;HMM.coverage=0.991;Alt=PDLC01742, Cas1b_WP_142933338.1, 2.4e-133, 0.979, 0.991 | PDLC02065, Cas1b_WP_013704840.1, 1.9e-106, 0.973, 0.985 | PDLC02067, Cas1b_WP_188882336.1, 2.2e-34, 0.895, 0.57 | PDLC02066, Cas1b_WP_035727688.1, 2.1e-21, 0.913, 0.957
2-6_NC_015634.1	padloc	cas_type_I-B1	2504950	2505444	4.6e-57	-	.	Name=Cas4b;HMM.accession=PDLC01771;HMM.name=Cas4b_WP_019267510.1;Target.coverage=0.982;HMM.coverage=0.969;Alt=PDLC01771, Cas4b_WP_019267510.1, 4.6e-57, 0.982, 0.969 | PDLC02086, Cas4b_WP_077327524.1, 8.6e-39, 0.988, 0.994 | PDLC01772, Cas4b_WP_113688895.1, 2.8e-25, 0.976, 0.957
2-6_NC_015634.1	padloc	cas_type_I-B1	2505441	2507987	1e-280	-	.	Name=Cas3b;HMM.accession=PDLC01758;HMM.name=Cas3b_WP_152020024.1;Target.coverage=0.986;HMM.coverage=0.992;Alt=PDLC01758, Cas3b_WP_152020024.1, 1e-280, 0.986, 0.992 | PDLC01764, Cas3b_WP_048085590.1, 1.1e-94, 0.873, 0.834 | PDLC01759, Cas3b_WP_184405015.1, 9.5e-82, 0.908, 0.918 | PDLC02082, Cas3b_WP_162272993.1, 5.7e-79, 0.859, 0.898 | PDLC01757, Cas3b_WP_098917028.1, 1.6e-37, 0.814, 0.788
2-6_NC_015634.1	padloc	cas_type_I-B1	2508006	2508755	3.8e-47	-	.	Name=Cas5b;HMM.accession=PDLC00951;HMM.name=cas_Cas5h;Target.coverage=0.968;HMM.coverage=0.975;Alt=PDLC00951, cas_Cas5h, 3.8e-47, 0.968, 0.975 | PDLC02096, Cas5b_WP_048038568.1, 1.5e-18, 0.988, 0.991 | PDLC00947, cas_Cas5t, 6.1e-06, 0.688, 0.654 | PDLC02097, Cas5b_WP_147923379.1, 0.026, 0.184, 0.179 | PDLC01197, C19_cas5_1, 2.7, 0.268, 0.27
2-6_NC_015634.1	padloc	cas_type_I-B1	2508770	2509717	2.7e-33	-	.	Name=Cas7b;HMM.accession=PDLC01614;HMM.name=pfam05107;Target.coverage=0.81;HMM.coverage=0.939;Alt=PDLC01614, pfam05107, 2.7e-33, 0.81, 0.939 | PDLC00964, cas_CT1132, 4.6e-11, 0.668, 0.705 | PDLC00963, cas_Csh2, 4.9e-08, 0.728, 0.745 | PDLC01303, cd09690, 1.4e-05, 0.807, 0.847
2-6_NC_015634.1	padloc	cas_type_I-B1	2509701	2511599	6.4e-144	-	.	Name=Cas8b;HMM.accession=PDLC01507;HMM.name=mkCas0106;Target.coverage=0.984;HMM.coverage=0.996;Alt=PDLC01507, mkCas0106, 6.4e-144, 0.984, 0.996
2-6_NC_015634.1	padloc	cas_type_I-B1	2511754	2512461	2e-79	-	.	Name=Cas6b;HMM.accession=PDLC01784;HMM.name=Cas6b_WP_072896889.1;Target.coverage=0.975;HMM.coverage=0.991;Alt=PDLC01784, Cas6b_WP_072896889.1, 2e-79, 0.975, 0.991 | PDLC01787, Cas6b_WP_075531536.1, 1.3e-24, 0.919, 0.932 | PDLC01791, Cas6b_WP_069593058.1, 1e-08, 0.644, 0.665 | PDLC01782, Cas6b_WP_066632526.1, 0.00022, 0.767, 0.77 | PDLC01785, Cas6b_WP_092935998.1, 7.1, 0.237, 0.202
36D1_NC_016023.1	padloc	wadjet_type_III	1991070	1994267	0	-	.	Name=JetC3;HMM.accession=PDLC00580;HMM.name=JetC3_00003;Target.coverage=0.998;HMM.coverage=0.997;Alt=PDLC00580, JetC3_00003, 0, 0.998, 0.997 | PDLC00581, JetC3_00004, 0.00061, 0.305, 0.227 | PDLC00582, JetC3_00005, 0.00073, 0.31, 0.224
36D1_NC_016023.1	padloc	wadjet_type_III	1994264	1994953	2.2e-116	-	.	Name=JetB3;HMM.accession=PDLC00570;HMM.name=JetB3_00001;Target.coverage=0.961;HMM.coverage=0.965;Alt=PDLC00570, JetB3_00001, 2.2e-116, 0.961, 0.965
36D1_NC_016023.1	padloc	wadjet_type_III	1994940	1996367	9.1e-237	-	.	Name=JetA3;HMM.accession=PDLC00559;HMM.name=JetA3_00002;Target.coverage=0.983;HMM.coverage=0.989;Alt=PDLC00559, JetA3_00002, 9.1e-237, 0.983, 0.989
36D1_NC_016023.1	padloc	wadjet_type_III	1996343	1997644	6.7e-168	-	.	Name=JetD3;HMM.accession=PDLC00590;HMM.name=JetD3_00001;Target.coverage=0.995;HMM.coverage=0.998;Alt=PDLC00590, JetD3_00001, 6.7e-168, 0.995, 0.998
36D1_NC_016023.1	padloc	cas_type_I-B1	2106532	2107287	1.1e-78	+	.	Name=Cas6b;HMM.accession=PDLC01782;HMM.name=Cas6b_WP_066632526.1;Target.coverage=0.976;HMM.coverage=0.991;Alt=PDLC01782, Cas6b_WP_066632526.1, 1.1e-78, 0.976, 0.991 | PDLC01783, Cas6b_WP_086036083.1, 2e-22, 0.976, 0.996 | PDLC02103, Cas6b_WP_008118709.1, 1.3e-13, 0.563, 0.575 | PDLC01788, Cas6b_WP_161954899.1, 4e-12, 0.813, 0.886 | PDLC01791, Cas6b_WP_069593058.1, 4.7e-12, 0.968, 0.983
36D1_NC_016023.1	padloc	cas_type_I-B1	2107339	2109363	1.6e-291	+	.	Name=Cas8b;HMM.accession=PDLC01483;HMM.name=mkCas0074;Target.coverage=0.984;HMM.coverage=0.998;Alt=PDLC01483, mkCas0074, 1.6e-291, 0.984, 0.998 | PDLC01623, pfam09484, 1.2e-06, 0.396, 0.438
36D1_NC_016023.1	padloc	cas_type_I-B1	2109350	2110306	5.3e-59	+	.	Name=Cas7b;HMM.accession=PDLC01614;HMM.name=pfam05107;Target.coverage=0.853;HMM.coverage=0.98;Alt=PDLC01614, pfam05107, 5.3e-59, 0.853, 0.98 | PDLC00963, cas_Csh2, 3.1e-45, 0.937, 0.983 | PDLC01303, cd09690, 8.5e-44, 0.937, 0.981 | PDLC00964, cas_CT1132, 2e-42, 0.897, 0.937
36D1_NC_016023.1	padloc	cas_type_I-B1	2110319	2111008	2e-29	+	.	Name=Cas5b;HMM.accession=PDLC02096;HMM.name=Cas5b_WP_048038568.1;Target.coverage=0.887;HMM.coverage=0.919;Alt=PDLC02096, Cas5b_WP_048038568.1, 2e-29, 0.887, 0.919 | PDLC00951, cas_Cas5h, 2.4e-20, 0.622, 0.656 | PDLC02097, Cas5b_WP_147923379.1, 1.2e-05, 0.348, 0.347 | PDLC00947, cas_Cas5t, 0.0025, 0.461, 0.502 | PDLC02094, Cas5b_WP_177377672.1, 0.11, 0.23, 0.14
36D1_NC_016023.1	padloc	cas_type_I-B1	2110996	2113359	0	+	.	Name=Cas3b;HMM.accession=PDLC01763;HMM.name=Cas3b_WP_065294164.1;Target.coverage=0.997;HMM.coverage=0.999;Alt=PDLC01763, Cas3b_WP_065294164.1, 0, 0.997, 0.999 | PDLC01759, Cas3b_WP_184405015.1, 1.1e-97, 0.807, 0.845 | PDLC02082, Cas3b_WP_162272993.1, 5.5e-82, 0.839, 0.88 | PDLC01758, Cas3b_WP_152020024.1, 6e-38, 0.73, 0.726 | PDLC01761, Cas3b_WP_008086256.1, 1.9e-36, 0.796, 0.838
36D1_NC_016023.1	padloc	cas_type_I-B1	2113372	2113881	3.5e-59	+	.	Name=Cas4b;HMM.accession=PDLC01771;HMM.name=Cas4b_WP_019267510.1;Target.coverage=0.947;HMM.coverage=0.969;Alt=PDLC01771, Cas4b_WP_019267510.1, 3.5e-59, 0.947, 0.969 | PDLC02086, Cas4b_WP_077327524.1, 4.1e-42, 0.947, 0.988 | PDLC01772, Cas4b_WP_113688895.1, 1.9e-25, 0.947, 0.963 | PDLC02087, Cas4b_WP_154810420.1, 0.23, 0.265, 0.243
36D1_NC_016023.1	padloc	cas_type_I-B1	2115621	2116451	5.5e-113	+	.	Name=Cas1b;HMM.accession=PDLC01742;HMM.name=Cas1b_WP_142933338.1;Target.coverage=0.982;HMM.coverage=0.81;Alt=PDLC01742, Cas1b_WP_142933338.1, 5.5e-113, 0.982, 0.81 | PDLC02065, Cas1b_WP_013704840.1, 3.4e-102, 0.982, 0.809 | PDLC02067, Cas1b_WP_188882336.1, 1.9e-41, 0.953, 0.495 | PDLC02066, Cas1b_WP_035727688.1, 1.9e-27, 0.942, 0.807
36D1_NC_016023.1	padloc	cas_type_I-B1	2116461	2116724	1.2e-33	+	.	Name=Cas2b;HMM.accession=PDLC01749;HMM.name=Cas2b_WP_014295803.1;Target.coverage=0.977;HMM.coverage=0.989;Alt=PDLC01749, Cas2b_WP_014295803.1, 1.2e-33, 0.977, 0.989 | PDLC02076, Cas2b_WP_066217071.1, 7.2e-30, 0.966, 0.977 | PDLC01750, Cas2b_WP_096389957.1, 4.6e-11, 0.716, 0.733 | PDLC02077, Cas2b_WP_028460064.1, 1.2e-07, 0.852, 0.802 | PDLC02078, Cas2b_WP_038071942.1, 2.5e-06, 0.784, 0.734
36D1_NC_016023.1	padloc	wadjet_type_II	2211811	2213109	1.2e-150	-	.	Name=JetD2;HMM.accession=PDLC00556;HMM.name=JetD2_00002;Target.coverage=0.979;HMM.coverage=0.984;Alt=PDLC00556, JetD2_00002, 1.2e-150, 0.979, 0.984 | PDLC00557, JetD2_00003, 6.1e-55, 0.963, 0.969 | PDLC00555, JetD2_00001, 1.7e-15, 0.58, 0.551
36D1_NC_016023.1	padloc	wadjet_type_II	2213238	2217332	0	-	.	Name=JetC2;HMM.accession=PDLC00551;HMM.name=JetC2_00003;Target.coverage=0.99;HMM.coverage=0.992;Alt=PDLC00550, JetC2_00002, 0, 0.988, 0.994 | PDLC00551, JetC2_00003, 0, 0.99, 0.992 | PDLC00552, JetC2_00004, 4.5e-249, 0.988, 0.985 | PDLC00553, JetC2_00005, 1.9e-227, 0.99, 0.984 | PDLC00554, JetC2_00006, 4.7e-124, 0.276, 0.944
36D1_NC_016023.1	padloc	wadjet_type_II	2217350	2218513	1.8e-151	-	.	Name=JetB2;HMM.accession=PDLC00542;HMM.name=JetB2_00001;Target.coverage=0.977;HMM.coverage=0.987;Alt=PDLC00542, JetB2_00001, 1.8e-151, 0.977, 0.987 | PDLC00547, JetB2_00006, 6.3e-71, 0.943, 0.925 | PDLC00546, JetB2_00005, 5.7e-38, 0.925, 0.888 | PDLC00543, JetB2_00002, 5.8e-22, 0.91, 0.889 | PDLC00545, JetB2_00004, 0.00012, 0.549, 0.474
36D1_NC_016023.1	padloc	wadjet_type_II	2218513	2219991	4.1e-208	-	.	Name=JetA2;HMM.accession=PDLC00537;HMM.name=JetA2_00004;Target.coverage=0.986;HMM.coverage=0.976;Alt=PDLC00537, JetA2_00004, 4.1e-208, 0.986, 0.976 | PDLC00540, JetA2_00007, 3.6e-194, 0.986, 0.974 | PDLC00536, JetA2_00003, 1.9e-67, 0.963, 0.931 | PDLC00535, JetA2_00002, 1.2e-61, 0.972, 0.961 | PDLC00541, JetA2_00008, 1.3e-43, 0.966, 0.924
CSIL1_NZ_AXVW01000033.1_scaffold00030.30_C	padloc	wadjet_type_III	21736	23037	6.7e-168	+	.	Name=JetD3;HMM.accession=PDLC00590;HMM.name=JetD3_00001;Target.coverage=0.995;HMM.coverage=0.998;Alt=PDLC00590, JetD3_00001, 6.7e-168, 0.995, 0.998
CSIL1_NZ_AXVW01000033.1_scaffold00030.30_C	padloc	wadjet_type_III	23013	24440	1e-236	+	.	Name=JetA3;HMM.accession=PDLC00559;HMM.name=JetA3_00002;Target.coverage=0.983;HMM.coverage=0.989;Alt=PDLC00559, JetA3_00002, 1e-236, 0.983, 0.989
CSIL1_NZ_AXVW01000033.1_scaffold00030.30_C	padloc	wadjet_type_III	24427	25116	1.9e-116	+	.	Name=JetB3;HMM.accession=PDLC00570;HMM.name=JetB3_00001;Target.coverage=0.961;HMM.coverage=0.965;Alt=PDLC00570, JetB3_00001, 1.9e-116, 0.961, 0.965
CSIL1_NZ_AXVW01000033.1_scaffold00030.30_C	padloc	wadjet_type_III	25113	28310	0	+	.	Name=JetC3;HMM.accession=PDLC00580;HMM.name=JetC3_00003;Target.coverage=0.998;HMM.coverage=0.997;Alt=PDLC00580, JetC3_00003, 0, 0.998, 0.997 | PDLC00581, JetC3_00004, 0.00087, 0.279, 0.208 | PDLC00582, JetC3_00005, 0.001, 0.31, 0.224
CSIL1_NZ_AXVW01000052.1_scaffold00047.47_C	padloc	cas_type_I-C	17720	20146	4e-218	+	.	Name=Cas3c;HMM.accession=PDLC01765;HMM.name=Cas3c_WP_004513240.1;Target.coverage=0.985;HMM.coverage=0.962;Alt=PDLC01765, Cas3c_WP_004513240.1, 4e-218, 0.985, 0.962 | PDLC01766, Cas3c_WP_097654879.1, 7.9e-180, 0.986, 0.67
CSIL1_NZ_AXVW01000052.1_scaffold00047.47_C	padloc	cas_type_I-C	20344	21063	3.2e-86	+	.	Name=Cas5c;HMM.accession=PDLC00948;HMM.name=cas_Cas5d;Target.coverage=0.833;HMM.coverage=0.995;Alt=PDLC00948, cas_Cas5d, 3.2e-86, 0.833, 0.995 | PDLC01264, cd09651, 3.8e-59, 0.804, 0.989 | PDLC01365, cd09752, 3.8e-59, 0.804, 0.989
CSIL1_NZ_AXVW01000052.1_scaffold00047.47_C	padloc	cas_type_I-C	21064	22944	1.5e-155	+	.	Name=Cas8c;HMM.accession=PDLC01370;HMM.name=cd09757;Target.coverage=0.968;HMM.coverage=0.993;Alt=PDLC01370, cd09757, 1.5e-155, 0.968, 0.993 | PDLC01647, pfam09709, 1.5e-153, 0.967, 0.998 | PDLC00970, cas_Csd1, 4.1e-141, 0.981, 0.997 | PDLC01255, cd09642, 2.7e-131, 0.982, 0.996 | PDLC01562, mkCas0173, 0.00036, 0.255, 0.233
CSIL1_NZ_AXVW01000052.1_scaffold00047.47_C	padloc	cas_type_I-C	22968	23828	3.7e-111	+	.	Name=Cas7c;HMM.accession=PDLC01461;HMM.name=COG3649;Target.coverage=0.979;HMM.coverage=0.988;Alt=PDLC01461, COG3649, 3.7e-111, 0.979, 0.988 | PDLC01302, cd09689, 7.5e-110, 0.958, 0.992 | PDLC00958, cas_Csd2, 5.4e-109, 0.93, 0.94 | PDLC01253, cd09640, 3.8e-68, 0.861, 0.926
CSIL1_NZ_AXVW01000052.1_scaffold00047.47_C	padloc	cas_type_I-C	23818	24474	4.2e-90	+	.	Name=Cas4c;HMM.accession=PDLC01773;HMM.name=Cas4c_WP_149685095.1;Target.coverage=0.977;HMM.coverage=0.86;Alt=PDLC01773, Cas4c_WP_149685095.1, 4.2e-90, 0.977, 0.86 | PDLC01774, Cas4c_WP_082207107.1, 4.7e-43, 0.963, 0.958 | PDLC01775, Cas4c_WP_154643161.1, 2.8e-10, 0.461, 0.779
CSIL1_NZ_AXVW01000052.1_scaffold00047.47_C	padloc	cas_type_I-C	24471	25502	1.3e-162	+	.	Name=Cas1c;HMM.accession=PDLC01743;HMM.name=Cas1c_WP_008519397.1;Target.coverage=0.994;HMM.coverage=0.997;Alt=PDLC01743, Cas1c_WP_008519397.1, 1.3e-162, 0.994, 0.997 | PDLC00923, cas1_DVULG, 3.3e-147, 0.985, 0.997
CSIL1_NZ_AXVW01000052.1_scaffold00047.47_C	padloc	cas_type_I-C	25474	25803	3.2e-42	+	.	Name=Cas2c;HMM.accession=PDLC01751;HMM.name=Cas2c_WP_035173219.1;Target.coverage=0.855;HMM.coverage=0.979;Alt=PDLC01751, Cas2c_WP_035173219.1, 3.2e-42, 0.855, 0.979
CSIL1_NZ_AXVW01000068.1_scaffold00063.63_C	padloc	cas_type_I-C	7339	9486	2.7e-175	+	.	Name=Cas3c;HMM.accession=PDLC01765;HMM.name=Cas3c_WP_004513240.1;Target.coverage=0.985;HMM.coverage=0.94;Alt=PDLC01765, Cas3c_WP_004513240.1, 2.7e-175, 0.985, 0.94 | PDLC01766, Cas3c_WP_097654879.1, 1.3e-166, 0.993, 0.656
CSIL1_NZ_AXVW01000068.1_scaffold00063.63_C	padloc	cas_type_I-C	9490	10143	1.1e-60	+	.	Name=Cas5c;HMM.accession=PDLC01264;HMM.name=cd09651;Target.coverage=0.931;HMM.coverage=0.994;Alt=PDLC01264, cd09651, 1.1e-60, 0.931, 0.994 | PDLC01365, cd09752, 1.1e-60, 0.931, 0.994 | PDLC00948, cas_Cas5d, 5.6e-46, 0.931, 0.966
CSIL1_NZ_AXVW01000068.1_scaffold00063.63_C	padloc	cas_type_I-C	10144	11823	2e-108	+	.	Name=Cas8c;HMM.accession=PDLC01647;HMM.name=pfam09709;Target.coverage=0.943;HMM.coverage=0.985;Alt=PDLC01647, pfam09709, 2e-108, 0.943, 0.985 | PDLC01370, cd09757, 7.9e-103, 0.95, 0.998 | PDLC01255, cd09642, 8e-100, 0.961, 0.996 | PDLC00970, cas_Csd1, 1.6e-96, 0.952, 0.99 | PDLC01343, cd09730, 0.0014, 0.279, 0.247
CSIL1_NZ_AXVW01000068.1_scaffold00063.63_C	padloc	cas_type_I-C	11825	12748	1e-93	+	.	Name=Cas7c;HMM.accession=PDLC00958;HMM.name=cas_Csd2;Target.coverage=0.919;HMM.coverage=0.993;Alt=PDLC00958, cas_Csd2, 1e-93, 0.919, 0.993 | PDLC01302, cd09689, 7.6e-88, 0.916, 0.989 | PDLC01253, cd09640, 4.5e-59, 0.847, 0.948 | PDLC01461, COG3649, 2.1e-37, 0.877, 0.92
DSM1_NZ_CP009709.1	padloc	wadjet_type_II	1472852	1474147	7e-150	-	.	Name=JetD2;HMM.accession=PDLC00556;HMM.name=JetD2_00002;Target.coverage=0.977;HMM.coverage=0.979;Alt=PDLC00556, JetD2_00002, 7e-150, 0.977, 0.979 | PDLC00557, JetD2_00003, 5.3e-57, 0.963, 0.967 | PDLC00555, JetD2_00001, 5.8e-19, 0.579, 0.549
DSM1_NZ_CP009709.1	padloc	wadjet_type_II	1474277	1477876	0	-	.	Name=JetC2;HMM.accession=PDLC00551;HMM.name=JetC2_00003;Target.coverage=0.99;HMM.coverage=0.872;Alt=PDLC00551, JetC2_00003, 0, 0.99, 0.872 | PDLC00550, JetC2_00002, 1.5e-253, 0.988, 0.876 | PDLC00552, JetC2_00004, 8.4e-178, 0.988, 0.863 | PDLC00553, JetC2_00005, 1.9e-165, 0.988, 0.863 | PDLC00554, JetC2_00006, 1.2e-43, 0.174, 0.536
DSM1_NZ_CP009709.1	padloc	wadjet_type_II	1477824	1478369	3.4e-69	-	.	Name=JetC2;HMM.accession=PDLC00554;HMM.name=JetC2_00006;Target.coverage=0.846;HMM.coverage=0.385;Alt=PDLC00551, JetC2_00003, 4.1e-97, 0.846, 0.113 | PDLC00550, JetC2_00002, 9.2e-78, 0.852, 0.111 | PDLC00554, JetC2_00006, 3.4e-69, 0.846, 0.385 | PDLC00552, JetC2_00004, 1.1e-58, 0.846, 0.116 | PDLC00553, JetC2_00005, 4.8e-50, 0.846, 0.112
DSM1_NZ_CP009709.1	padloc	wadjet_type_II	1478387	1479550	6.3e-152	-	.	Name=JetB2;HMM.accession=PDLC00542;HMM.name=JetB2_00001;Target.coverage=0.977;HMM.coverage=0.987;Alt=PDLC00542, JetB2_00001, 6.3e-152, 0.977, 0.987 | PDLC00547, JetB2_00006, 1e-68, 0.943, 0.925 | PDLC00546, JetB2_00005, 2e-37, 0.925, 0.888 | PDLC00543, JetB2_00002, 6.9e-20, 0.907, 0.886 | PDLC00545, JetB2_00004, 3.6e-05, 0.549, 0.474
DSM1_NZ_CP009709.1	padloc	wadjet_type_II	1479675	1481153	3e-207	-	.	Name=JetA2;HMM.accession=PDLC00537;HMM.name=JetA2_00004;Target.coverage=0.988;HMM.coverage=0.978;Alt=PDLC00537, JetA2_00004, 3e-207, 0.988, 0.978 | PDLC00540, JetA2_00007, 1.1e-193, 0.99, 0.978 | PDLC00536, JetA2_00003, 1.2e-68, 0.97, 0.936 | PDLC00535, JetA2_00002, 5.7e-62, 0.974, 0.963 | PDLC00541, JetA2_00008, 4.8e-45, 0.972, 0.93
DSM1_NZ_CP009709.1	padloc	cas_type_I-C	1542073	1542402	2.3e-42	-	.	Name=Cas2c;HMM.accession=PDLC01751;HMM.name=Cas2c_WP_035173219.1;Target.coverage=0.855;HMM.coverage=0.979;Alt=PDLC01751, Cas2c_WP_035173219.1, 2.3e-42, 0.855, 0.979
DSM1_NZ_CP009709.1	padloc	cas_type_I-C	1542374	1543405	1e-161	-	.	Name=Cas1c;HMM.accession=PDLC01743;HMM.name=Cas1c_WP_008519397.1;Target.coverage=0.994;HMM.coverage=0.997;Alt=PDLC01743, Cas1c_WP_008519397.1, 1e-161, 0.994, 0.997 | PDLC00923, cas1_DVULG, 3.5e-146, 0.985, 0.997
DSM1_NZ_CP009709.1	padloc	cas_type_I-C	1543402	1544058	2.9e-90	-	.	Name=Cas4c;HMM.accession=PDLC01773;HMM.name=Cas4c_WP_149685095.1;Target.coverage=0.977;HMM.coverage=0.86;Alt=PDLC01773, Cas4c_WP_149685095.1, 2.9e-90, 0.977, 0.86 | PDLC01774, Cas4c_WP_082207107.1, 1.4e-43, 0.963, 0.958 | PDLC01775, Cas4c_WP_154643161.1, 2.2e-11, 0.461, 0.779
DSM1_NZ_CP009709.1	padloc	cas_type_I-C	1544048	1544908	2.5e-111	-	.	Name=Cas7c;HMM.accession=PDLC01461;HMM.name=COG3649;Target.coverage=0.979;HMM.coverage=0.988;Alt=PDLC01461, COG3649, 2.5e-111, 0.979, 0.988 | PDLC01302, cd09689, 6.3e-110, 0.955, 0.989 | PDLC00958, cas_Csd2, 3.5e-109, 0.93, 0.94 | PDLC01253, cd09640, 2.6e-68, 0.861, 0.926
DSM1_NZ_CP009709.1	padloc	cas_type_I-C	1544930	1546420	4.8e-125	-	.	Name=Cas8c;HMM.accession=PDLC01370;HMM.name=cd09757;Target.coverage=0.968;HMM.coverage=0.79;Alt=PDLC01370, cd09757, 4.8e-125, 0.968, 0.79 | PDLC01647, pfam09709, 2e-124, 0.968, 0.798 | PDLC00970, cas_Csd1, 1.4e-116, 0.98, 0.786 | PDLC01255, cd09642, 2.9e-104, 0.962, 0.772 | PDLC01562, mkCas0173, 0.00021, 0.326, 0.236
DSM1_NZ_CP009709.1	padloc	cas_type_I-C	1548656	1549054	5.9e-33	-	.	Name=Cas5c;HMM.accession=PDLC00948;HMM.name=cas_Cas5d;Target.coverage=0.737;HMM.coverage=0.493;Alt=PDLC00948, cas_Cas5d, 5.9e-33, 0.737, 0.493 | PDLC01264, cd09651, 1.8e-20, 0.662, 0.449 | PDLC01365, cd09752, 1.8e-20, 0.662, 0.449
DSM1_NZ_CP009709.1	padloc	cas_type_other	1556617	1556970	4.8e-42	-	.	Name=Cas5c;HMM.accession=PDLC00948;HMM.name=cas_Cas5d;Target.coverage=0.788;HMM.coverage=0.458;Alt=PDLC00948, cas_Cas5d, 4.8e-42, 0.788, 0.458 | PDLC01264, cd09651, 1.1e-32, 0.814, 0.506 | PDLC01365, cd09752, 1.1e-32, 0.814, 0.506 | PDLC01644, pfam09704, 3.5e-21, 0.805, 0.521 | PDLC00950, CRISPR_cas5, 9.2e-12, 0.356, 0.93
DSM1_NZ_CP009709.1	padloc	cas_type_other	1557166	1559589	4.8e-219	-	.	Name=Cas3c;HMM.accession=PDLC01765;HMM.name=Cas3c_WP_004513240.1;Target.coverage=0.985;HMM.coverage=0.962;Alt=PDLC01765, Cas3c_WP_004513240.1, 4.8e-219, 0.985, 0.962 | PDLC01766, Cas3c_WP_097654879.1, 1.3e-180, 0.984, 0.668 | PDLC01759, Cas3b_WP_184405015.1, 8.1e-120, 0.984, 0.989 | PDLC02082, Cas3b_WP_162272993.1, 5.7e-115, 0.958, 0.947 | PDLC01710, COG1203, 2.3e-91, 0.845, 0.898
DSM1_NZ_CP009709.1	padloc	cas_type_IV-A	2406546	2407340	6e-37	+	.	Name=typeIV_Cas8;HMM.accession=PDLC01721;HMM.name=cluster3;Target.coverage=0.758;HMM.coverage=0.907;Alt=PDLC01721, cluster3, 6e-37, 0.758, 0.907 | PDLC01574, mkCas0185, 1e-19, 0.596, 0.756 | PDLC01001, cas8u_csf1, 1.6e-15, 0.438, 0.569 | PDLC01318, cd09705, 2e-15, 0.438, 0.608 | PDLC01722, cluster20, 3.4e-06, 0.196, 0.292
DSM1_NZ_CP009709.1	padloc	cas_type_IV-A	2409096	2410052	1.6e-66	+	.	Name=typeIV_Cas7;HMM.accession=PDLC01724;HMM.name=cluster1;Target.coverage=0.981;HMM.coverage=0.945;Alt=PDLC01724, cluster1, 1.6e-66, 0.981, 0.945 | PDLC01572, mkCas0183, 3.8e-39, 0.843, 0.921 | PDLC01552, mkCas0162, 7.1e-38, 0.812, 0.901 | PDLC01004, csf2_IV_maka_1, 8.2e-33, 0.815, 0.882 | PDLC01319, cd09706, 1.2e-16, 0.724, 0.797
DSM1_NZ_CP009709.1	padloc	cas_type_IV-A	2410049	2410732	3.7e-39	+	.	Name=typeIV_Cas5;HMM.accession=PDLC01727;HMM.name=cluster2;Target.coverage=0.969;HMM.coverage=0.973;Alt=PDLC01727, cluster2, 3.7e-39, 0.969, 0.973 | PDLC01498, mkCas0093, 7.6e-21, 0.939, 0.974 | PDLC01006, csf3_IV_maka_1, 1.9e-17, 0.746, 0.757 | PDLC01005, cas5_csf3, 2.7e-13, 0.737, 0.86 | PDLC01320, cd09707, 2.3e-12, 0.89, 0.985
DSM1_NZ_CP009709.1	padloc	cas_type_IV-A	2410725	2411441	8e-13	+	.	Name=typeIV_Cas6;HMM.accession=PDLC01717;HMM.name=cluster11;Target.coverage=0.556;HMM.coverage=0.51;Alt=PDLC01717, cluster11, 8e-13, 0.556, 0.51
DSM1_NZ_CP009709.1	padloc	cas_type_other	2463854	2464648	6e-37	+	.	Name=typeIV_Cas8;HMM.accession=PDLC01721;HMM.name=cluster3;Target.coverage=0.758;HMM.coverage=0.907;Alt=PDLC01721, cluster3, 6e-37, 0.758, 0.907 | PDLC01574, mkCas0185, 1e-19, 0.596, 0.756 | PDLC01001, cas8u_csf1, 1.6e-15, 0.438, 0.569 | PDLC01318, cd09705, 2e-15, 0.438, 0.608 | PDLC01722, cluster20, 3.4e-06, 0.196, 0.292
DSM1_NZ_CP009709.1	padloc	cas_type_other	2467362	2467616	6e-07	+	.	Name=typeIV_Cas5;HMM.accession=PDLC01727;HMM.name=cluster2;Target.coverage=0.965;HMM.coverage=0.351;Alt=PDLC01727, cluster2, 6e-07, 0.965, 0.351 | PDLC01005, cas5_csf3, 0.066, 0.718, 0.279
DSM1_NZ_CP009709.1	padloc	cas_type_other	2468040	2468756	2.2e-13	+	.	Name=Cas6;HMM.accession=PDLC01466;HMM.name=COG5551;Target.coverage=0.561;HMM.coverage=0.529;Alt=PDLC01466, COG5551, 2.2e-13, 0.561, 0.529 | PDLC01650, pfam10040, 2.5e-13, 0.464, 0.951 | PDLC01717, cluster11, 8e-13, 0.556, 0.51 | PDLC02042, Cas6d_WP_065712011.1, 1.4e-12, 0.561, 0.48 | PDLC01781, Cas6_IIIa_WP_087192841.1, 2.8e-12, 0.573, 0.544
DSM1_NZ_CP009709.1	padloc	cas_type_I-C	2777843	2779981	3.2e-174	+	.	Name=Cas3c;HMM.accession=PDLC01765;HMM.name=Cas3c_WP_004513240.1;Target.coverage=0.983;HMM.coverage=0.93;Alt=PDLC01765, Cas3c_WP_004513240.1, 3.2e-174, 0.983, 0.93 | PDLC01766, Cas3c_WP_097654879.1, 2.2e-165, 0.989, 0.65
DSM1_NZ_CP009709.1	padloc	cas_type_I-C	2779985	2780350	5e-30	+	.	Name=Cas5c;HMM.accession=PDLC01264;HMM.name=cd09651;Target.coverage=0.582;HMM.coverage=0.348;Alt=PDLC01264, cd09651, 5e-30, 0.582, 0.348 | PDLC01365, cd09752, 5e-30, 0.582, 0.348 | PDLC00948, cas_Cas5d, 1e-21, 0.582, 0.34
DSM1_NZ_CP009709.1	padloc	cas_type_I-C	2782205	2782471	6.5e-17	+	.	Name=Cas5c;HMM.accession=PDLC01264;HMM.name=cd09651;Target.coverage=0.876;HMM.coverage=0.399;Alt=PDLC01264, cd09651, 6.5e-17, 0.876, 0.399 | PDLC01365, cd09752, 6.5e-17, 0.876, 0.399 | PDLC00948, cas_Cas5d, 2.8e-11, 0.888, 0.404
DSM1_NZ_CP009709.1	padloc	cas_type_I-C	2782472	2784148	4.5e-111	+	.	Name=Cas8c;HMM.accession=PDLC01647;HMM.name=pfam09709;Target.coverage=0.945;HMM.coverage=0.985;Alt=PDLC01647, pfam09709, 4.5e-111, 0.945, 0.985 | PDLC01370, cd09757, 8.2e-104, 0.952, 0.998 | PDLC01255, cd09642, 2.1e-100, 0.962, 0.996 | PDLC00970, cas_Csd1, 4.4e-97, 0.953, 0.99 | PDLC01285, cd09672, 0.0069, 0.193, 0.188
DSM1_NZ_CP009709.1	padloc	cas_type_I-C	2784152	2785075	1.4e-94	+	.	Name=Cas7c;HMM.accession=PDLC00958;HMM.name=cas_Csd2;Target.coverage=0.919;HMM.coverage=0.993;Alt=PDLC00958, cas_Csd2, 1.4e-94, 0.919, 0.993 | PDLC01302, cd09689, 4.1e-89, 0.916, 0.989 | PDLC01253, cd09640, 9.1e-60, 0.847, 0.948 | PDLC01461, COG3649, 3.4e-37, 0.877, 0.92
H-1_NZ_ANAQ01000049.1_000049	padloc	cas_type_I-C	3662	5800	1.8e-175	+	.	Name=Cas3c;HMM.accession=PDLC01765;HMM.name=Cas3c_WP_004513240.1;Target.coverage=0.98;HMM.coverage=0.928;Alt=PDLC01765, Cas3c_WP_004513240.1, 1.8e-175, 0.98, 0.928 | PDLC01766, Cas3c_WP_097654879.1, 6.5e-166, 0.99, 0.65
H-1_NZ_ANAQ01000049.1_000049	padloc	cas_type_I-C	5804	6457	4.4e-61	+	.	Name=Cas5c;HMM.accession=PDLC01264;HMM.name=cd09651;Target.coverage=0.931;HMM.coverage=0.994;Alt=PDLC01264, cd09651, 4.4e-61, 0.931, 0.994 | PDLC01365, cd09752, 4.4e-61, 0.931, 0.994 | PDLC00948, cas_Cas5d, 1.2e-46, 0.931, 0.966
H-1_NZ_ANAQ01000049.1_000049	padloc	cas_type_I-C	6458	8134	1.2e-109	+	.	Name=Cas8c;HMM.accession=PDLC01647;HMM.name=pfam09709;Target.coverage=0.945;HMM.coverage=0.985;Alt=PDLC01647, pfam09709, 1.2e-109, 0.945, 0.985 | PDLC01370, cd09757, 2.6e-104, 0.952, 0.998 | PDLC01255, cd09642, 9.4e-100, 0.962, 0.996 | PDLC00970, cas_Csd1, 3.8e-96, 0.953, 0.99 | PDLC01285, cd09672, 0.0031, 0.191, 0.186
H-1_NZ_ANAQ01000049.1_000049	padloc	cas_type_I-C	8138	9061	1.1e-94	+	.	Name=Cas7c;HMM.accession=PDLC00958;HMM.name=cas_Csd2;Target.coverage=0.919;HMM.coverage=0.993;Alt=PDLC00958, cas_Csd2, 1.1e-94, 0.919, 0.993 | PDLC01302, cd09689, 1.5e-89, 0.919, 0.992 | PDLC01253, cd09640, 8.6e-60, 0.847, 0.948 | PDLC01461, COG3649, 2.9e-37, 0.877, 0.92
H-1_NZ_ANAQ01000268.1_000268	padloc	cas_type_I-B1	8099	8806	2e-79	+	.	Name=Cas6b;HMM.accession=PDLC01784;HMM.name=Cas6b_WP_072896889.1;Target.coverage=0.975;HMM.coverage=0.991;Alt=PDLC01784, Cas6b_WP_072896889.1, 2e-79, 0.975, 0.991 | PDLC01787, Cas6b_WP_075531536.1, 1.3e-24, 0.919, 0.932 | PDLC01791, Cas6b_WP_069593058.1, 1e-08, 0.644, 0.665 | PDLC01782, Cas6b_WP_066632526.1, 0.00022, 0.767, 0.77 | PDLC01785, Cas6b_WP_092935998.1, 7.1, 0.237, 0.202
H-1_NZ_ANAQ01000268.1_000268	padloc	cas_type_I-B1	8961	10856	1e-143	+	.	Name=Cas8b;HMM.accession=PDLC01507;HMM.name=mkCas0106;Target.coverage=0.984;HMM.coverage=0.995;Alt=PDLC01507, mkCas0106, 1e-143, 0.984, 0.995
H-1_NZ_ANAQ01000268.1_000268	padloc	cas_type_I-B1	10843	11790	2.7e-33	+	.	Name=Cas7b;HMM.accession=PDLC01614;HMM.name=pfam05107;Target.coverage=0.81;HMM.coverage=0.939;Alt=PDLC01614, pfam05107, 2.7e-33, 0.81, 0.939 | PDLC00964, cas_CT1132, 4.6e-11, 0.668, 0.705 | PDLC00963, cas_Csh2, 4.9e-08, 0.728, 0.745 | PDLC01303, cd09690, 1.4e-05, 0.807, 0.847
H-1_NZ_ANAQ01000268.1_000268	padloc	cas_type_I-B1	11805	12554	6.2e-46	+	.	Name=Cas5b;HMM.accession=PDLC00951;HMM.name=cas_Cas5h;Target.coverage=0.964;HMM.coverage=0.971;Alt=PDLC00951, cas_Cas5h, 6.2e-46, 0.964, 0.971 | PDLC02096, Cas5b_WP_048038568.1, 1.2e-17, 0.988, 0.991 | PDLC00947, cas_Cas5t, 1e-05, 0.688, 0.654 | PDLC02097, Cas5b_WP_147923379.1, 0.023, 0.184, 0.179 | PDLC01197, C19_cas5_1, 2.7, 0.264, 0.265
H-1_NZ_ANAQ01000268.1_000268	padloc	cas_type_I-B1	12573	14342	4.8e-194	+	.	Name=Cas3b;HMM.accession=PDLC01758;HMM.name=Cas3b_WP_152020024.1;Target.coverage=0.992;HMM.coverage=0.7;Alt=PDLC01758, Cas3b_WP_152020024.1, 4.8e-194, 0.992, 0.7 | PDLC01764, Cas3b_WP_048085590.1, 1.1e-74, 0.92, 0.598 | PDLC01759, Cas3b_WP_184405015.1, 7.4e-57, 0.944, 0.655 | PDLC02082, Cas3b_WP_162272993.1, 6.3e-50, 0.869, 0.635 | PDLC01763, Cas3b_WP_065294164.1, 4.2e-26, 0.373, 0.269
H-1_NZ_ANAQ01000268.1_000268	padloc	cas_type_I-B1	15115	15609	4.6e-57	+	.	Name=Cas4b;HMM.accession=PDLC01771;HMM.name=Cas4b_WP_019267510.1;Target.coverage=0.982;HMM.coverage=0.969;Alt=PDLC01771, Cas4b_WP_019267510.1, 4.6e-57, 0.982, 0.969 | PDLC02086, Cas4b_WP_077327524.1, 8.6e-39, 0.988, 0.994 | PDLC01772, Cas4b_WP_113688895.1, 2.8e-25, 0.976, 0.957
H-1_NZ_ANAQ01000268.1_000268	padloc	cas_type_I-B1	16046	17047	3.8e-133	+	.	Name=Cas1b;HMM.accession=PDLC01742;HMM.name=Cas1b_WP_142933338.1;Target.coverage=0.979;HMM.coverage=0.991;Alt=PDLC01742, Cas1b_WP_142933338.1, 3.8e-133, 0.979, 0.991 | PDLC02065, Cas1b_WP_013704840.1, 2.1e-106, 0.973, 0.985 | PDLC02067, Cas1b_WP_188882336.1, 2.3e-34, 0.895, 0.57 | PDLC02066, Cas1b_WP_035727688.1, 1.9e-21, 0.913, 0.957
H-1_NZ_ANAQ01000268.1_000268	padloc	cas_type_I-B1	17047	17340	2.6e-33	+	.	Name=Cas2b;HMM.accession=PDLC01749;HMM.name=Cas2b_WP_014295803.1;Target.coverage=0.857;HMM.coverage=0.966;Alt=PDLC01749, Cas2b_WP_014295803.1, 2.6e-33, 0.857, 0.966 | PDLC02076, Cas2b_WP_066217071.1, 1.8e-23, 0.796, 0.897 | PDLC01750, Cas2b_WP_096389957.1, 1.8e-10, 0.786, 0.884 | PDLC02077, Cas2b_WP_028460064.1, 7e-10, 0.776, 0.812 | PDLC02078, Cas2b_WP_038071942.1, 2e-07, 0.612, 0.649
H-1_NZ_ANAQ01000363.1_000363	padloc	wadjet_type_II	1168	2463	1.3e-149	-	.	Name=JetD2;HMM.accession=PDLC00556;HMM.name=JetD2_00002;Target.coverage=0.977;HMM.coverage=0.979;Alt=PDLC00556, JetD2_00002, 1.3e-149, 0.977, 0.979 | PDLC00557, JetD2_00003, 1.6e-56, 0.963, 0.967 | PDLC00555, JetD2_00001, 6.3e-19, 0.581, 0.551
H-1_NZ_ANAQ01000363.1_000363	padloc	wadjet_type_II	2593	6684	0	-	.	Name=JetC2;HMM.accession=PDLC00551;HMM.name=JetC2_00003;Target.coverage=0.992;HMM.coverage=0.993;Alt=PDLC00550, JetC2_00002, 0, 0.989, 0.994 | PDLC00551, JetC2_00003, 0, 0.992, 0.993 | PDLC00552, JetC2_00004, 1.7e-250, 0.988, 0.985 | PDLC00553, JetC2_00005, 1.3e-224, 0.99, 0.983 | PDLC00554, JetC2_00006, 8.6e-126, 0.271, 0.938
H-1_NZ_ANAQ01000363.1_000363	padloc	wadjet_type_II	6702	7865	1.3e-151	-	.	Name=JetB2;HMM.accession=PDLC00542;HMM.name=JetB2_00001;Target.coverage=0.974;HMM.coverage=0.985;Alt=PDLC00542, JetB2_00001, 1.3e-151, 0.974, 0.985 | PDLC00547, JetB2_00006, 4.5e-69, 0.943, 0.925 | PDLC00546, JetB2_00005, 7.4e-37, 0.925, 0.888 | PDLC00543, JetB2_00002, 1.7e-20, 0.905, 0.884 | PDLC00545, JetB2_00004, 5.8e-05, 0.549, 0.474
H-1_NZ_ANAQ01000363.1_000363	padloc	wadjet_type_II	7990	9468	4.9e-207	-	.	Name=JetA2;HMM.accession=PDLC00537;HMM.name=JetA2_00004;Target.coverage=0.988;HMM.coverage=0.978;Alt=PDLC00537, JetA2_00004, 4.9e-207, 0.988, 0.978 | PDLC00540, JetA2_00007, 1.2e-193, 0.99, 0.978 | PDLC00536, JetA2_00003, 2e-68, 0.97, 0.936 | PDLC00535, JetA2_00002, 2.1e-61, 0.974, 0.963 | PDLC00541, JetA2_00008, 5.9e-45, 0.972, 0.93
MA-13_NZ_SMSP02000042.1_295	padloc	wadjet_type_II	21113	22591	1.3e-206	+	.	Name=JetA2;HMM.accession=PDLC00537;HMM.name=JetA2_00004;Target.coverage=0.988;HMM.coverage=0.978;Alt=PDLC00537, JetA2_00004, 1.3e-206, 0.988, 0.978 | PDLC00540, JetA2_00007, 1.4e-193, 0.99, 0.978 | PDLC00536, JetA2_00003, 1.8e-68, 0.97, 0.936 | PDLC00535, JetA2_00002, 1.7e-61, 0.974, 0.963 | PDLC00541, JetA2_00008, 2.3e-45, 0.972, 0.93
MA-13_NZ_SMSP02000042.1_295	padloc	wadjet_type_II	22716	23879	6.2e-152	+	.	Name=JetB2;HMM.accession=PDLC00542;HMM.name=JetB2_00001;Target.coverage=0.977;HMM.coverage=0.987;Alt=PDLC00542, JetB2_00001, 6.2e-152, 0.977, 0.987 | PDLC00547, JetB2_00006, 5e-69, 0.943, 0.925 | PDLC00546, JetB2_00005, 5.6e-37, 0.925, 0.888 | PDLC00543, JetB2_00002, 6.8e-20, 0.907, 0.886 | PDLC00545, JetB2_00004, 3.6e-05, 0.549, 0.474
MA-13_NZ_SMSP02000042.1_295	padloc	wadjet_type_II	23897	27988	0	+	.	Name=JetC2;HMM.accession=PDLC00551;HMM.name=JetC2_00003;Target.coverage=0.992;HMM.coverage=0.993;Alt=PDLC00550, JetC2_00002, 0, 0.989, 0.994 | PDLC00551, JetC2_00003, 0, 0.992, 0.993 | PDLC00552, JetC2_00004, 9.4e-250, 0.988, 0.985 | PDLC00553, JetC2_00005, 1.4e-225, 0.99, 0.983 | PDLC00554, JetC2_00006, 1.3e-125, 0.271, 0.936
MA-13_NZ_SMSP02000042.1_295	padloc	wadjet_type_II	28120	29415	4e-149	+	.	Name=JetD2;HMM.accession=PDLC00556;HMM.name=JetD2_00002;Target.coverage=0.977;HMM.coverage=0.979;Alt=PDLC00556, JetD2_00002, 4e-149, 0.977, 0.979 | PDLC00557, JetD2_00003, 3.7e-56, 0.963, 0.967 | PDLC00555, JetD2_00001, 6.3e-19, 0.581, 0.551
MA-13_NZ_SMSP02000061.1_151	padloc	cas_type_I-C	10539	11462	1e-93	-	.	Name=Cas7c;HMM.accession=PDLC00958;HMM.name=cas_Csd2;Target.coverage=0.919;HMM.coverage=0.993;Alt=PDLC00958, cas_Csd2, 1e-93, 0.919, 0.993 | PDLC01302, cd09689, 7.6e-88, 0.916, 0.989 | PDLC01253, cd09640, 4.5e-59, 0.847, 0.948 | PDLC01461, COG3649, 2.1e-37, 0.877, 0.92
MA-13_NZ_SMSP02000061.1_151	padloc	cas_type_I-C	11464	13143	2.3e-110	-	.	Name=Cas8c;HMM.accession=PDLC01647;HMM.name=pfam09709;Target.coverage=0.943;HMM.coverage=0.985;Alt=PDLC01647, pfam09709, 2.3e-110, 0.943, 0.985 | PDLC01370, cd09757, 3e-105, 0.95, 0.998 | PDLC01255, cd09642, 3.6e-101, 0.961, 0.996 | PDLC00970, cas_Csd1, 3.6e-98, 0.952, 0.99 | PDLC01343, cd09730, 0.00084, 0.257, 0.241
MA-13_NZ_SMSP02000061.1_151	padloc	cas_type_I-C	13144	13797	4.4e-61	-	.	Name=Cas5c;HMM.accession=PDLC01264;HMM.name=cd09651;Target.coverage=0.931;HMM.coverage=0.994;Alt=PDLC01264, cd09651, 4.4e-61, 0.931, 0.994 | PDLC01365, cd09752, 4.4e-61, 0.931, 0.994 | PDLC00948, cas_Cas5d, 1.2e-46, 0.931, 0.966
MA-13_NZ_SMSP02000061.1_151	padloc	cas_type_I-C	13801	15939	1.4e-174	-	.	Name=Cas3c;HMM.accession=PDLC01765;HMM.name=Cas3c_WP_004513240.1;Target.coverage=0.98;HMM.coverage=0.928;Alt=PDLC01765, Cas3c_WP_004513240.1, 1.4e-174, 0.98, 0.928 | PDLC01766, Cas3c_WP_097654879.1, 4.9e-166, 0.99, 0.65
MA-13_NZ_SMSP02000062.1_309	padloc	cas_type_I-C	44020	46446	2.7e-218	+	.	Name=Cas3c;HMM.accession=PDLC01765;HMM.name=Cas3c_WP_004513240.1;Target.coverage=0.985;HMM.coverage=0.962;Alt=PDLC01765, Cas3c_WP_004513240.1, 2.7e-218, 0.985, 0.962 | PDLC01766, Cas3c_WP_097654879.1, 5.7e-179, 0.986, 0.67
MA-13_NZ_SMSP02000062.1_309	padloc	cas_type_I-C	46644	47363	1.4e-86	+	.	Name=Cas5c;HMM.accession=PDLC00948;HMM.name=cas_Cas5d;Target.coverage=0.833;HMM.coverage=0.995;Alt=PDLC00948, cas_Cas5d, 1.4e-86, 0.833, 0.995 | PDLC01264, cd09651, 1.8e-59, 0.804, 0.989 | PDLC01365, cd09752, 1.8e-59, 0.804, 0.989
MA-13_NZ_SMSP02000062.1_309	padloc	cas_type_I-C	47364	49244	1.4e-155	+	.	Name=Cas8c;HMM.accession=PDLC01370;HMM.name=cd09757;Target.coverage=0.968;HMM.coverage=0.993;Alt=PDLC01370, cd09757, 1.4e-155, 0.968, 0.993 | PDLC01647, pfam09709, 1.2e-152, 0.967, 0.998 | PDLC00970, cas_Csd1, 1.6e-141, 0.981, 0.997 | PDLC01255, cd09642, 2.4e-132, 0.982, 0.996 | PDLC01562, mkCas0173, 0.00034, 0.258, 0.236
MA-13_NZ_SMSP02000062.1_309	padloc	cas_type_I-C	49266	50126	7.8e-112	+	.	Name=Cas7c;HMM.accession=PDLC01461;HMM.name=COG3649;Target.coverage=0.979;HMM.coverage=0.988;Alt=PDLC01461, COG3649, 7.8e-112, 0.979, 0.988 | PDLC01302, cd09689, 5e-110, 0.958, 0.992 | PDLC00958, cas_Csd2, 3.4e-109, 0.93, 0.94 | PDLC01253, cd09640, 2.6e-68, 0.861, 0.926
MA-13_NZ_SMSP02000062.1_309	padloc	cas_type_I-C	50116	50772	2.9e-90	+	.	Name=Cas4c;HMM.accession=PDLC01773;HMM.name=Cas4c_WP_149685095.1;Target.coverage=0.977;HMM.coverage=0.86;Alt=PDLC01773, Cas4c_WP_149685095.1, 2.9e-90, 0.977, 0.86 | PDLC01774, Cas4c_WP_082207107.1, 1.4e-43, 0.963, 0.958 | PDLC01775, Cas4c_WP_154643161.1, 2.2e-11, 0.461, 0.779
MA-13_NZ_SMSP02000062.1_309	padloc	cas_type_I-C	50769	51800	3.5e-162	+	.	Name=Cas1c;HMM.accession=PDLC01743;HMM.name=Cas1c_WP_008519397.1;Target.coverage=0.994;HMM.coverage=0.997;Alt=PDLC01743, Cas1c_WP_008519397.1, 3.5e-162, 0.994, 0.997 | PDLC00923, cas1_DVULG, 1.6e-146, 0.985, 0.997
MA-13_NZ_SMSP02000062.1_309	padloc	cas_type_I-C	51772	52101	2.3e-42	+	.	Name=Cas2c;HMM.accession=PDLC01751;HMM.name=Cas2c_WP_035173219.1;Target.coverage=0.855;HMM.coverage=0.979;Alt=PDLC01751, Cas2c_WP_035173219.1, 2.3e-42, 0.855, 0.979
P38_NZ_JSVI01000006.1_6	padloc	cas_type_I-B1	90157	90864	5e-79	+	.	Name=Cas6b;HMM.accession=PDLC01784;HMM.name=Cas6b_WP_072896889.1;Target.coverage=0.975;HMM.coverage=0.991;Alt=PDLC01784, Cas6b_WP_072896889.1, 5e-79, 0.975, 0.991 | PDLC01787, Cas6b_WP_075531536.1, 9.5e-24, 0.919, 0.932 | PDLC01791, Cas6b_WP_069593058.1, 6.1e-08, 0.61, 0.631 | PDLC01782, Cas6b_WP_066632526.1, 0.00022, 0.767, 0.77 | PDLC01785, Cas6b_WP_092935998.1, 7.1, 0.237, 0.202
P38_NZ_JSVI01000006.1_6	padloc	cas_type_I-B1	91019	92917	1.7e-143	+	.	Name=Cas8b;HMM.accession=PDLC01507;HMM.name=mkCas0106;Target.coverage=0.984;HMM.coverage=0.996;Alt=PDLC01507, mkCas0106, 1.7e-143, 0.984, 0.996
P38_NZ_JSVI01000006.1_6	padloc	cas_type_I-B1	92901	93848	2.7e-33	+	.	Name=Cas7b;HMM.accession=PDLC01614;HMM.name=pfam05107;Target.coverage=0.81;HMM.coverage=0.939;Alt=PDLC01614, pfam05107, 2.7e-33, 0.81, 0.939 | PDLC00964, cas_CT1132, 4.6e-11, 0.668, 0.705 | PDLC00963, cas_Csh2, 4.9e-08, 0.728, 0.745 | PDLC01303, cd09690, 1.4e-05, 0.807, 0.847
P38_NZ_JSVI01000006.1_6	padloc	cas_type_I-B1	93863	94612	3.8e-47	+	.	Name=Cas5b;HMM.accession=PDLC00951;HMM.name=cas_Cas5h;Target.coverage=0.968;HMM.coverage=0.975;Alt=PDLC00951, cas_Cas5h, 3.8e-47, 0.968, 0.975 | PDLC02096, Cas5b_WP_048038568.1, 1.5e-18, 0.988, 0.991 | PDLC00947, cas_Cas5t, 6.1e-06, 0.688, 0.654 | PDLC02097, Cas5b_WP_147923379.1, 0.026, 0.184, 0.179 | PDLC01197, C19_cas5_1, 2.7, 0.268, 0.27
P38_NZ_JSVI01000006.1_6	padloc	cas_type_I-B1	94631	97177	8.3e-281	+	.	Name=Cas3b;HMM.accession=PDLC01758;HMM.name=Cas3b_WP_152020024.1;Target.coverage=0.986;HMM.coverage=0.992;Alt=PDLC01758, Cas3b_WP_152020024.1, 8.3e-281, 0.986, 0.992 | PDLC01764, Cas3b_WP_048085590.1, 2.1e-94, 0.875, 0.836 | PDLC01759, Cas3b_WP_184405015.1, 1.8e-81, 0.907, 0.917 | PDLC02082, Cas3b_WP_162272993.1, 1.8e-78, 0.857, 0.896 | PDLC01757, Cas3b_WP_098917028.1, 1.9e-37, 0.813, 0.787
P38_NZ_JSVI01000006.1_6	padloc	cas_type_I-B1	97174	97668	4.6e-57	+	.	Name=Cas4b;HMM.accession=PDLC01771;HMM.name=Cas4b_WP_019267510.1;Target.coverage=0.982;HMM.coverage=0.969;Alt=PDLC01771, Cas4b_WP_019267510.1, 4.6e-57, 0.982, 0.969 | PDLC02086, Cas4b_WP_077327524.1, 8.6e-39, 0.988, 0.994 | PDLC01772, Cas4b_WP_113688895.1, 2.8e-25, 0.976, 0.957
P38_NZ_JSVI01000006.1_6	padloc	cas_type_I-B1	98105	99106	3.8e-133	+	.	Name=Cas1b;HMM.accession=PDLC01742;HMM.name=Cas1b_WP_142933338.1;Target.coverage=0.979;HMM.coverage=0.991;Alt=PDLC01742, Cas1b_WP_142933338.1, 3.8e-133, 0.979, 0.991 | PDLC02065, Cas1b_WP_013704840.1, 2.1e-106, 0.973, 0.985 | PDLC02067, Cas1b_WP_188882336.1, 2.3e-34, 0.895, 0.57 | PDLC02066, Cas1b_WP_035727688.1, 1.9e-21, 0.913, 0.957
P38_NZ_JSVI01000006.1_6	padloc	cas_type_I-B1	99106	99399	2.6e-33	+	.	Name=Cas2b;HMM.accession=PDLC01749;HMM.name=Cas2b_WP_014295803.1;Target.coverage=0.857;HMM.coverage=0.966;Alt=PDLC01749, Cas2b_WP_014295803.1, 2.6e-33, 0.857, 0.966 | PDLC02076, Cas2b_WP_066217071.1, 1.8e-23, 0.796, 0.897 | PDLC01750, Cas2b_WP_096389957.1, 1.8e-10, 0.786, 0.884 | PDLC02077, Cas2b_WP_028460064.1, 7e-10, 0.776, 0.812 | PDLC02078, Cas2b_WP_038071942.1, 2e-07, 0.612, 0.649
P38_NZ_JSVI01000010.1_10	padloc	wadjet_type_II	15111	16589	4.1e-208	+	.	Name=JetA2;HMM.accession=PDLC00537;HMM.name=JetA2_00004;Target.coverage=0.986;HMM.coverage=0.976;Alt=PDLC00537, JetA2_00004, 4.1e-208, 0.986, 0.976 | PDLC00540, JetA2_00007, 3.6e-194, 0.986, 0.974 | PDLC00536, JetA2_00003, 1.9e-67, 0.963, 0.931 | PDLC00535, JetA2_00002, 1.2e-61, 0.972, 0.961 | PDLC00541, JetA2_00008, 1.3e-43, 0.966, 0.924
P38_NZ_JSVI01000010.1_10	padloc	wadjet_type_II	16589	17752	2.5e-151	+	.	Name=JetB2;HMM.accession=PDLC00542;HMM.name=JetB2_00001;Target.coverage=0.977;HMM.coverage=0.987;Alt=PDLC00542, JetB2_00001, 2.5e-151, 0.977, 0.987 | PDLC00547, JetB2_00006, 5.7e-71, 0.943, 0.925 | PDLC00546, JetB2_00005, 6.4e-38, 0.925, 0.888 | PDLC00543, JetB2_00002, 7.3e-22, 0.91, 0.889 | PDLC00545, JetB2_00004, 0.00012, 0.549, 0.474
P38_NZ_JSVI01000010.1_10	padloc	wadjet_type_II	17770	21864	0	+	.	Name=JetC2;HMM.accession=PDLC00551;HMM.name=JetC2_00003;Target.coverage=0.99;HMM.coverage=0.992;Alt=PDLC00550, JetC2_00002, 0, 0.988, 0.994 | PDLC00551, JetC2_00003, 0, 0.99, 0.992 | PDLC00552, JetC2_00004, 1.9e-249, 0.988, 0.985 | PDLC00553, JetC2_00005, 1.2e-227, 0.99, 0.984 | PDLC00554, JetC2_00006, 9.1e-124, 0.278, 0.951
P38_NZ_JSVI01000010.1_10	padloc	wadjet_type_II	21993	23291	1.5e-150	+	.	Name=JetD2;HMM.accession=PDLC00556;HMM.name=JetD2_00002;Target.coverage=0.979;HMM.coverage=0.984;Alt=PDLC00556, JetD2_00002, 1.5e-150, 0.979, 0.984 | PDLC00557, JetD2_00003, 6.7e-55, 0.961, 0.967 | PDLC00555, JetD2_00001, 1.7e-15, 0.58, 0.551
XZL4_NZ_GL995248.1_scaffold70	padloc	wadjet_type_II	46598	48076	1.5e-206	+	.	Name=JetA2;HMM.accession=PDLC00537;HMM.name=JetA2_00004;Target.coverage=0.988;HMM.coverage=0.978;Alt=PDLC00537, JetA2_00004, 1.5e-206, 0.988, 0.978 | PDLC00540, JetA2_00007, 1.7e-192, 0.99, 0.978 | PDLC00536, JetA2_00003, 3.1e-68, 0.97, 0.936 | PDLC00535, JetA2_00002, 3.7e-61, 0.974, 0.963 | PDLC00541, JetA2_00008, 7.2e-45, 0.972, 0.93
XZL4_NZ_GL995248.1_scaffold70	padloc	wadjet_type_II	48201	49364	1.9e-152	+	.	Name=JetB2;HMM.accession=PDLC00542;HMM.name=JetB2_00001;Target.coverage=0.977;HMM.coverage=0.987;Alt=PDLC00542, JetB2_00001, 1.9e-152, 0.977, 0.987 | PDLC00547, JetB2_00006, 4.2e-68, 0.943, 0.925 | PDLC00546, JetB2_00005, 2.1e-38, 0.925, 0.888 | PDLC00543, JetB2_00002, 3.3e-20, 0.907, 0.886 | PDLC00545, JetB2_00004, 5.4e-05, 0.549, 0.474
XZL4_NZ_GL995248.1_scaffold70	padloc	wadjet_type_II	49382	53473	0	+	.	Name=JetC2;HMM.accession=PDLC00551;HMM.name=JetC2_00003;Target.coverage=0.991;HMM.coverage=0.992;Alt=PDLC00550, JetC2_00002, 0, 0.989, 0.994 | PDLC00551, JetC2_00003, 0, 0.991, 0.992 | PDLC00552, JetC2_00004, 2.7e-249, 0.988, 0.985 | PDLC00553, JetC2_00005, 2.6e-226, 0.99, 0.984 | PDLC00554, JetC2_00006, 8.8e-126, 0.271, 0.936
XZL4_NZ_GL995248.1_scaffold70	padloc	wadjet_type_II	53603	54898	2.5e-149	+	.	Name=JetD2;HMM.accession=PDLC00556;HMM.name=JetD2_00002;Target.coverage=0.977;HMM.coverage=0.979;Alt=PDLC00556, JetD2_00002, 2.5e-149, 0.977, 0.979 | PDLC00557, JetD2_00003, 3e-56, 0.963, 0.967 | PDLC00555, JetD2_00001, 7.7e-19, 0.581, 0.551
XZL9_NZ_ANAP01000008.1_000008	padloc	wadjet_type_II	25728	27026	1.2e-150	-	.	Name=JetD2;HMM.accession=PDLC00556;HMM.name=JetD2_00002;Target.coverage=0.979;HMM.coverage=0.984;Alt=PDLC00556, JetD2_00002, 1.2e-150, 0.979, 0.984 | PDLC00557, JetD2_00003, 6.1e-55, 0.963, 0.969 | PDLC00555, JetD2_00001, 1.7e-15, 0.58, 0.551
XZL9_NZ_ANAP01000008.1_000008	padloc	wadjet_type_II	27155	31249	0	-	.	Name=JetC2;HMM.accession=PDLC00551;HMM.name=JetC2_00003;Target.coverage=0.99;HMM.coverage=0.992;Alt=PDLC00550, JetC2_00002, 0, 0.988, 0.994 | PDLC00551, JetC2_00003, 0, 0.99, 0.992 | PDLC00552, JetC2_00004, 1.6e-249, 0.988, 0.985 | PDLC00553, JetC2_00005, 5.7e-228, 0.99, 0.984 | PDLC00554, JetC2_00006, 4.4e-124, 0.278, 0.951
XZL9_NZ_ANAP01000008.1_000008	padloc	wadjet_type_II	31267	32430	2.5e-151	-	.	Name=JetB2;HMM.accession=PDLC00542;HMM.name=JetB2_00001;Target.coverage=0.977;HMM.coverage=0.987;Alt=PDLC00542, JetB2_00001, 2.5e-151, 0.977, 0.987 | PDLC00547, JetB2_00006, 5.7e-71, 0.943, 0.925 | PDLC00546, JetB2_00005, 6.4e-38, 0.925, 0.888 | PDLC00543, JetB2_00002, 7.3e-22, 0.91, 0.889 | PDLC00545, JetB2_00004, 0.00012, 0.549, 0.474
XZL9_NZ_ANAP01000008.1_000008	padloc	wadjet_type_II	32430	33908	5.4e-208	-	.	Name=JetA2;HMM.accession=PDLC00537;HMM.name=JetA2_00004;Target.coverage=0.986;HMM.coverage=0.976;Alt=PDLC00537, JetA2_00004, 5.4e-208, 0.986, 0.976 | PDLC00540, JetA2_00007, 8.2e-194, 0.986, 0.974 | PDLC00536, JetA2_00003, 1.5e-67, 0.963, 0.931 | PDLC00535, JetA2_00002, 3.5e-61, 0.972, 0.961 | PDLC00541, JetA2_00008, 4.1e-43, 0.966, 0.924
XZL9_NZ_ANAP01000085.1_000085	padloc	gabija	5907	6485	1e-78	-	.	Name=GajB;HMM.accession=PDLC00113;HMM.name=GajB_00011;Target.coverage=0.953;HMM.coverage=0.318;Alt=PDLC00113, GajB_00011, 1e-78, 0.953, 0.318 | PDLC00135, GajB_00033, 1.3e-51, 0.907, 0.292 | PDLC00128, GajB_00026, 4.5e-33, 0.539, 0.152 | PDLC00111, GajB_00009, 1.1e-32, 0.528, 0.166 | PDLC00143, GajB_00041, 2.4e-32, 0.539, 0.168
XZL9_NZ_ANAP01000085.1_000085	padloc	gabija	6506	8653	3.6e-270	-	.	Name=GajA;HMM.accession=PDLC00063;HMM.name=GajA_00003;Target.coverage=0.992;HMM.coverage=0.971;Alt=PDLC00063, GajA_00003, 3.6e-270, 0.992, 0.971 | PDLC00093, GajA_00033, 3e-143, 0.992, 0.976 | PDLC00065, GajA_00005, 3.2e-143, 0.992, 0.99 | PDLC00079, GajA_00019, 1.9e-126, 0.992, 0.996 | PDLC00095, GajA_00035, 4.7e-105, 0.736, 0.685
XZL9_NZ_ANAP01000110.1_000111	padloc	gabija	20709	22514	1.4e-243	-	.	Name=GajB;HMM.accession=PDLC00126;HMM.name=GajB_00024;Target.coverage=0.987;HMM.coverage=0.987;Alt=PDLC00126, GajB_00024, 1.4e-243, 0.987, 0.987 | PDLC00131, GajB_00029, 1.9e-86, 0.975, 0.972 | PDLC00147, GajB_00045, 5.1e-50, 0.518, 0.49 | PDLC00105, GajB_00003, 5.8e-42, 0.49, 0.45 | PDLC00146, GajB_00044, 2.9e-32, 0.246, 0.223
XZL9_NZ_ANAP01000110.1_000111	padloc	gabija	22511	23848	3.2e-114	-	.	Name=GajA;HMM.accession=PDLC00080;HMM.name=GajA_00020;Target.coverage=0.942;HMM.coverage=0.555;Alt=PDLC00080, GajA_00020, 3.2e-114, 0.942, 0.555 | PDLC00099, GajA_00039, 1.8e-89, 0.953, 0.545 | PDLC00096, GajA_00036, 7.2e-62, 0.946, 0.546 | PDLC00091, GajA_00031, 2e-44, 0.57, 0.408 | PDLC00064, GajA_00004, 4e-42, 0.816, 0.67
XZL9_NZ_ANAP01000181.1_000184	padloc	wadjet_type_III	9426	12623	0	-	.	Name=JetC3;HMM.accession=PDLC00580;HMM.name=JetC3_00003;Target.coverage=0.998;HMM.coverage=0.997;Alt=PDLC00580, JetC3_00003, 0, 0.998, 0.997 | PDLC00581, JetC3_00004, 0.00061, 0.305, 0.227 | PDLC00582, JetC3_00005, 0.00073, 0.31, 0.224
XZL9_NZ_ANAP01000181.1_000184	padloc	wadjet_type_III	12620	13309	2.2e-116	-	.	Name=JetB3;HMM.accession=PDLC00570;HMM.name=JetB3_00001;Target.coverage=0.961;HMM.coverage=0.965;Alt=PDLC00570, JetB3_00001, 2.2e-116, 0.961, 0.965
XZL9_NZ_ANAP01000181.1_000184	padloc	wadjet_type_III	13296	14723	3.3e-236	-	.	Name=JetA3;HMM.accession=PDLC00559;HMM.name=JetA3_00002;Target.coverage=0.983;HMM.coverage=0.989;Alt=PDLC00559, JetA3_00002, 3.3e-236, 0.983, 0.989
XZL9_NZ_ANAP01000181.1_000184	padloc	wadjet_type_III	14699	16000	6.7e-168	-	.	Name=JetD3;HMM.accession=PDLC00590;HMM.name=JetD3_00001;Target.coverage=0.995;HMM.coverage=0.998;Alt=PDLC00590, JetD3_00001, 6.7e-168, 0.995, 0.998
XZL9_NZ_ANAP01000220.1_000226	padloc	cas_type_I-B1	3727	3990	1.2e-33	-	.	Name=Cas2b;HMM.accession=PDLC01749;HMM.name=Cas2b_WP_014295803.1;Target.coverage=0.977;HMM.coverage=0.989;Alt=PDLC01749, Cas2b_WP_014295803.1, 1.2e-33, 0.977, 0.989 | PDLC02076, Cas2b_WP_066217071.1, 7.2e-30, 0.966, 0.977 | PDLC01750, Cas2b_WP_096389957.1, 4.6e-11, 0.716, 0.733 | PDLC02077, Cas2b_WP_028460064.1, 1.2e-07, 0.852, 0.802 | PDLC02078, Cas2b_WP_038071942.1, 2.5e-06, 0.784, 0.734
XZL9_NZ_ANAP01000220.1_000226	padloc	cas_type_I-B1	4000	5004	5.9e-139	-	.	Name=Cas1b;HMM.accession=PDLC01742;HMM.name=Cas1b_WP_142933338.1;Target.coverage=0.994;HMM.coverage=0.997;Alt=PDLC01742, Cas1b_WP_142933338.1, 5.9e-139, 0.994, 0.997 | PDLC02065, Cas1b_WP_013704840.1, 3.6e-125, 0.994, 0.997 | PDLC02067, Cas1b_WP_188882336.1, 6.7e-51, 0.967, 0.612 | PDLC02066, Cas1b_WP_035727688.1, 3.5e-33, 0.925, 0.96
XZL9_NZ_ANAP01000220.1_000226	padloc	cas_type_I-B1	5006	5515	2.4e-58	-	.	Name=Cas4b;HMM.accession=PDLC01771;HMM.name=Cas4b_WP_019267510.1;Target.coverage=0.947;HMM.coverage=0.969;Alt=PDLC01771, Cas4b_WP_019267510.1, 2.4e-58, 0.947, 0.969 | PDLC02086, Cas4b_WP_077327524.1, 2.9e-41, 0.947, 0.988 | PDLC01772, Cas4b_WP_113688895.1, 8.7e-25, 0.947, 0.963 | PDLC02087, Cas4b_WP_154810420.1, 0.53, 0.259, 0.238
XZL9_NZ_ANAP01000220.1_000226	padloc	cas_type_I-B1	5528	7891	0	-	.	Name=Cas3b;HMM.accession=PDLC01763;HMM.name=Cas3b_WP_065294164.1;Target.coverage=0.997;HMM.coverage=0.999;Alt=PDLC01763, Cas3b_WP_065294164.1, 0, 0.997, 0.999 | PDLC01759, Cas3b_WP_184405015.1, 3.9e-100, 0.836, 0.872 | PDLC02082, Cas3b_WP_162272993.1, 2.3e-84, 0.928, 0.946 | PDLC01764, Cas3b_WP_048085590.1, 4.6e-39, 0.481, 0.466 | PDLC01758, Cas3b_WP_152020024.1, 2.5e-38, 0.78, 0.768
XZL9_NZ_ANAP01000220.1_000226	padloc	cas_type_I-B1	7879	8568	4.1e-27	-	.	Name=Cas5b;HMM.accession=PDLC02096;HMM.name=Cas5b_WP_048038568.1;Target.coverage=0.887;HMM.coverage=0.919;Alt=PDLC02096, Cas5b_WP_048038568.1, 4.1e-27, 0.887, 0.919 | PDLC00951, cas_Cas5h, 2e-18, 0.678, 0.697 | PDLC02097, Cas5b_WP_147923379.1, 0.00028, 0.348, 0.347 | PDLC02094, Cas5b_WP_177377672.1, 0.13, 0.239, 0.145 | PDLC00947, cas_Cas5t, 0.14, 0.452, 0.493
XZL9_NZ_ANAP01000220.1_000226	padloc	cas_type_I-B1	8582	9538	2.9e-58	-	.	Name=Cas7b;HMM.accession=PDLC01614;HMM.name=pfam05107;Target.coverage=0.853;HMM.coverage=0.98;Alt=PDLC01614, pfam05107, 2.9e-58, 0.853, 0.98 | PDLC00963, cas_Csh2, 5.5e-45, 0.937, 0.983 | PDLC01303, cd09690, 1e-43, 0.937, 0.981 | PDLC00964, cas_CT1132, 4.5e-41, 0.897, 0.937
XZL9_NZ_ANAP01000220.1_000226	padloc	cas_type_I-B1	9525	11549	1.2e-280	-	.	Name=Cas8b;HMM.accession=PDLC01483;HMM.name=mkCas0074;Target.coverage=0.982;HMM.coverage=0.997;Alt=PDLC01483, mkCas0074, 1.2e-280, 0.982, 0.997 | PDLC01623, pfam09484, 0.00017, 0.361, 0.397
XZL9_NZ_ANAP01000220.1_000226	padloc	cas_type_I-B1	11601	12356	4.1e-79	-	.	Name=Cas6b;HMM.accession=PDLC01782;HMM.name=Cas6b_WP_066632526.1;Target.coverage=0.976;HMM.coverage=0.991;Alt=PDLC01782, Cas6b_WP_066632526.1, 4.1e-79, 0.976, 0.991 | PDLC01783, Cas6b_WP_086036083.1, 3.1e-23, 0.976, 0.996 | PDLC02103, Cas6b_WP_008118709.1, 1.4e-13, 0.976, 0.992 | PDLC01788, Cas6b_WP_161954899.1, 2.2e-12, 0.813, 0.886 | PDLC01791, Cas6b_WP_069593058.1, 1.6e-11, 0.968, 0.983
