# Supplementary material for: A Genomic Comparative Analysis of Bacillus Coagulans Unravels the Genetic Potential of MA-13 Strain for Biotechnological Applications
Source: Preprints.org preprint supplement (doi:10.20944/preprints202112.0372.v1), 2021-12-22
Supplement: Supplementary file 7 [file Table S6.xlsx]

## Sheet: ST6 
Table S6. Summary of the cas operons in the B. coagulans strains
Strain	Contig	Type-subtype	Interference	Adaptation	Start	End	Genes
MA-13	MA-13_NZ_SMSP02000061.1_151	I-C	100	0	10539	15939	['Cas7_1_CAS-I-C', 'Cas8c_3_CAS-I-C', 'Cas5_0_CAS-I-C', 'Cas3_1_CAS-I']
	MA-13_NZ_SMSP02000062.1_309	I-C	100	100	44020	52101	['Cas3_1_CAS-I', 'Cas5_0_IC', 'Cas8c_1_CAS-I-C', 'Cas7_2_CAS-I-C', 'Cas4_0_I-II', 'Cas1_0_IC', 'Cas2_2_CAS-I-II-III-IV-V-VI']
DSM1	DSM1_NZ_CP009709.1	I-C	100	0	2777843	2785075	['Cas3_1_CAS-I', 'Cas5_0_CAS-I-C', 'Cas5_0_CAS-I-C', 'Cas8c_3_CAS-I-C', 'Cas7_1_CAS-I-C']
		I-C	75	100	1542073	1549054	['Cas2_2_CAS-I-II-III-IV-V-VI', 'Cas1_0_IC', 'Cas4_0_I-II', 'Cas7_2_CAS-I-C', 'Cas8c_1_CAS-I-C', 'Cas5_0_IC']
		IV-B	75	NA	2406546	2412159	['Csf1_0_IV', 'Csf2_0_IV', 'Csf3_0_IV', 'Cas6_8_CAS-I-II-III-IV-V-VI', 'CysH_0_IVB']
		IV-B	50	NA	2463854	2469474	['Csf1_0_IV', 'Csf3_0_IV', 'Cas6_8_CAS-I-II-III-IV-V-VI', 'CysH_0_IVB']
36D1	36D1_NC_016023.1	I-B	100	100	2106532	2116724	['Cas6_7_CAS-I-II-III-IV-V-VI', 'Cas8b1_7_CAS-I-B', 'Cas7b_0_CAS-I-B-I-C', 'Cas5_7_CAS-I-B', 'Cas3_1_CAS-I', 'Cas4_5_CAS-I-II-III-IV-V-VI', 'Cas1_6_CAS-I-II-III-IV-V-VI', 'Cas2_2_CAS-I-II-III-IV-V-VI']
XZL9	XZL9_NZ_ANAP01000220.1_000226	I-B	100	100	3727	12356	['Cas2_2_CAS-I-II-III-IV-V-VI', 'Cas1_6_CAS-I-II-III-IV-V-VI', 'Cas4_5_CAS-I-II-III-IV-V-VI', 'Cas3_1_CAS-I', 'Cas5_7_CAS-I-B', 'Cas7b_0_CAS-I-B-I-C', 'Cas8b1_7_CAS-I-B', 'Cas6_7_CAS-I-II-III-IV-V-VI']
P38	P38_NZ_JSVI01000006.1_6	I-B	100	100	90157	99399	['Cas6_0_CAS-III-B-I-B', 'Cas8b1_8_CAS-I-B', 'Cas7b_0_CAS-I-B-I-C', 'Cas5_7_CAS-I-B', 'Cas3_0_CAS-I', 'Cas4_5_CAS-I-II-III-IV-V-VI', 'Cas1_6_CAS-I-II-III-IV-V-VI', 'Cas2_2_CAS-I-II-III-IV-V-VI']
2-6	2-6_NC_015634.1	I-B	100	100	2503219	2512461	['Cas2_2_CAS-I-II-III-IV-V-VI', 'Cas1_6_CAS-I-II-III-IV-V-VI', 'Cas4_5_CAS-I-II-III-IV-V-VI', 'Cas3_0_CAS-I', 'Cas5_7_CAS-I-B', 'Cas7b_0_CAS-I-B-I-C', 'Cas8b1_8_CAS-I-B', 'Cas6_0_CAS-III-B-I-B']
H-1	H-1_NZ_ANAQ01000049.1_000049	I-C	100	0	3662	9061	['Cas3_1_CAS-I', 'Cas5_0_CAS-I-C', 'Cas8c_3_CAS-I-C', 'Cas7_1_CAS-I-C']
	H-1_NZ_ANAQ01000268.1_000268	I-B	100	100	8099	17340	['Cas6_0_CAS-III-B-I-B', 'Cas8b1_8_CAS-I-B', 'Cas7b_0_CAS-I-B-I-C', 'Cas5_7_CAS-I-B', 'Cas3_0_CAS-I', 'Cas4_5_CAS-I-II-III-IV-V-VI', 'Cas1_6_CAS-I-II-III-IV-V-VI', 'Cas2_2_CAS-I-II-III-IV-V-VI']
CSIL1	CSIL1_NZ_AXVW01000052.1_scaffold00047.47_C	I-C	100	100	17720	25803	['Cas3_1_CAS-I', 'Cas5_0_IC', 'Cas8c_1_CAS-I-C', 'Cas7_2_CAS-I-C', 'Cas4_0_I-II', 'Cas1_0_IC', 'Cas2_2_CAS-I-II-III-IV-V-VI']
	CSIL1_NZ_AXVW01000068.1_scaffold00063.63_C	I-C	100	0	7339	12748	['Cas3_1_CAS-I', 'Cas5_0_CAS-I-C', 'Cas8c_3_CAS-I-C', 'Cas7_1_CAS-I-C']
