# Supplementary material for: A Genomic Comparative Analysis of Bacillus Coagulans Unravels the Genetic Potential of MA-13 Strain for Biotechnological Applications
Source: Preprints.org preprint supplement (doi:10.20944/preprints202112.0372.v1), 2021-12-22
Supplement: Supplementary file 8 [file Table S7.xlsx]

## Sheet: ST7
Table S7. B. coagulans CRISPR spacer matches to viruses in the IMG-VR database
spacerID	Strain	IMGVR.acc.old	pident	alen	gap	mismatch	qstart	qend	sstart	send	evalue	bitscore	ecosystem.classif	vOTU	length	topology	MIUViG.quality	vir.taxonomy	vir.taxonomy.classif.method	host.taxonomy	host.prediction.method
2-6_1:21	2-6	IMGVR_UViG_3300025540_000001	100	36	0	0	1	36	14720	14755	1.81e-10	71.9	Engineered;Lab enrichment;Defined media;Unclassified;Engineered;	vOTU_067317	48934	Direct terminal repeats (DTRs)	High-quality	Duplodnaviria;Heunggongvirae;Uroviricota;Caudoviricetes;Caudovirales;;;	Viral RefSeq genes	Bacteria;Firmicutes;Bacilli;Bacillales;Bacillaceae;Bacillus;Bacillus coagulans	CRISPR (near)identical
2-6_1:27	2-6	Bacilli_gi_484000434	94.118	34	2	0	1	34	10213	10180	0.000158	52	NA;NA;NA;NA;NA;NA	Sg_135078	37377	Direct terminal repeats (DTRs)	High-quality	Duplodnaviria;Heunggongvirae;Uroviricota;Caudoviricetes;Caudovirales;Siphoviridae;;	Viral RefSeq genes	Bacteria;Firmicutes;Bacilli;Bacillales;Bacillaceae;Bacillus;	Provirus
2-6_1:33	2-6	IMGVR_UViG_3300025540_000001	100	35	0	0	1	35	14994	15028	6.72e-10	69.9	Engineered;Lab enrichment;Defined media;Unclassified;Engineered;	vOTU_067317	48934	Direct terminal repeats (DTRs)	High-quality	Duplodnaviria;Heunggongvirae;Uroviricota;Caudoviricetes;Caudovirales;;;	Viral RefSeq genes	Bacteria;Firmicutes;Bacilli;Bacillales;Bacillaceae;Bacillus;Bacillus coagulans	CRISPR (near)identical
2-6_1:43	2-6	IMGVR_UViG_3300002951_000001	96.552	29	1	0	7	35	23923	23895	0.000624	50.1	Engineered;Lab enrichment;Defined media;Unclassified;Engineered;	Sg_111311	35384	Linear contig	Genome fragment	Duplodnaviria;Heunggongvirae;Uroviricota;Caudoviricetes;Caudovirales;Siphoviridae;;	Viral RefSeq genes	Bacteria;Firmicutes;Bacilli;Bacillales;Bacillaceae;Bacillus;Bacillus coagulans	CRISPR (near)identical
2-6_1:43	2-6	IMGVR_UViG_3300002948_000017	96.552	29	1	0	7	35	6331	6359	0.000624	50.1	Engineered;Lab enrichment;Defined media;Unclassified;Engineered;	Sg_475097	13030	Linear contig	Genome fragment	Duplodnaviria;Heunggongvirae;Uroviricota;Caudoviricetes;Caudovirales;Siphoviridae;;	Viral RefSeq genes	Bacteria;Firmicutes;Bacilli;Bacillales;Bacillaceae;Bacillus;Bacillus coagulans	CRISPR (near)identical
2-6_1:43	2-6	IMGVR_UViG_3300025523_000001	96.552	29	1	0	7	35	23602	23574	0.000624	50.1	Engineered;Lab enrichment;Defined media;Unclassified;Engineered;	Sg_111311	40402	Direct terminal repeats (DTRs)	High-quality	Duplodnaviria;Heunggongvirae;Uroviricota;Caudoviricetes;Caudovirales;Siphoviridae;;	Viral RefSeq genes	Bacteria;Firmicutes;Bacilli;Bacillales;Bacillaceae;Bacillus;Bacillus coagulans	CRISPR (near)identical
2-6_1:47	2-6	IMGVR_UViG_3300025540_000001	94.118	34	2	0	1	34	48766	48799	0.000147	52	Engineered;Lab enrichment;Defined media;Unclassified;Engineered;	vOTU_067317	48934	Direct terminal repeats (DTRs)	High-quality	Duplodnaviria;Heunggongvirae;Uroviricota;Caudoviricetes;Caudovirales;;;	Viral RefSeq genes	Bacteria;Firmicutes;Bacilli;Bacillales;Bacillaceae;Bacillus;Bacillus coagulans	CRISPR (near)identical
36D1_3:1	36D1	IMGVR_UViG_3300025519_000006	100	35	0	0	1	35	36259	36293	6.72e-10	69.9	Engineered;Lab enrichment;Defined media;Unclassified;Engineered;	Sg_105915	41159	Linear contig	High-quality	Duplodnaviria;Heunggongvirae;Uroviricota;Caudoviricetes;Caudovirales;Siphoviridae;;	Viral RefSeq genes	Bacteria;Firmicutes;Bacilli;Bacillales;Bacillaceae;Bacillus;	Similarity to host genome
36D1_3:2	36D1	IMGVR_UViG_3300025540_000001	96.667	30	1	0	1	30	15361	15390	0.000168	52	Engineered;Lab enrichment;Defined media;Unclassified;Engineered;	vOTU_067317	48934	Direct terminal repeats (DTRs)	High-quality	Duplodnaviria;Heunggongvirae;Uroviricota;Caudoviricetes;Caudovirales;;;	Viral RefSeq genes	Bacteria;Firmicutes;Bacilli;Bacillales;Bacillaceae;Bacillus;Bacillus coagulans	CRISPR (near)identical
36D1_3:8	36D1	IMGVR_UViG_3300025517_000002	100	35	0	0	1	35	12264	12230	6.72e-10	69.9	Engineered;Lab enrichment;Defined media;Unclassified;Engineered;	Sg_081167	45288	Direct terminal repeats (DTRs)	High-quality	Duplodnaviria;Heunggongvirae;Uroviricota;Caudoviricetes;Caudovirales;Siphoviridae;;	Viral RefSeq genes	Bacteria;Firmicutes;Bacilli;Bacillales;Bacillaceae;Bacillus;Bacillus coagulans	CRISPR (near)identical
36D1_3:8	36D1	IMGVR_UViG_3300025540_000001	100	35	0	0	1	35	354	388	6.72e-10	69.9	Engineered;Lab enrichment;Defined media;Unclassified;Engineered;	vOTU_067317	48934	Direct terminal repeats (DTRs)	High-quality	Duplodnaviria;Heunggongvirae;Uroviricota;Caudoviricetes;Caudovirales;;;	Viral RefSeq genes	Bacteria;Firmicutes;Bacilli;Bacillales;Bacillaceae;Bacillus;Bacillus coagulans	CRISPR (near)identical
36D1_3:12	36D1	IMGVR_UViG_3300024520_000776	100	27	0	0	6	32	6836	6810	3.99e-05	54	Environmental;Aquatic;Marine;Inlet;Marine;	Sg_395751	15867	Linear contig	Genome fragment	Duplodnaviria;Heunggongvirae;Uroviricota;Caudoviricetes;Caudovirales;Siphoviridae;;	Viral RefSeq genes	0	0
36D1_3:14	36D1	IMGVR_UViG_3300025534_000066	100	32	0	0	1	32	1389	1358	4.7e-08	63.9	Engineered;Lab enrichment;Defined media;Unclassified;Engineered;	Sg_568232	10592	Linear contig	Genome fragment	Duplodnaviria;Heunggongvirae;Uroviricota;Caudoviricetes;Caudovirales;;;	Viral RefSeq genes	Bacteria;Firmicutes;Bacilli;Bacillales;Bacillaceae;Bacillus;Bacillus coagulans	CRISPR (near)identical
36D1_3:14	36D1	IMGVR_UViG_3300025540_000001	97.143	35	1	0	3	37	16051	16085	1.86e-07	61.9	Engineered;Lab enrichment;Defined media;Unclassified;Engineered;	vOTU_067317	48934	Direct terminal repeats (DTRs)	High-quality	Duplodnaviria;Heunggongvirae;Uroviricota;Caudoviricetes;Caudovirales;;;	Viral RefSeq genes	Bacteria;Firmicutes;Bacilli;Bacillales;Bacillaceae;Bacillus;Bacillus coagulans	CRISPR (near)identical
36D1_4:3	36D1	IMGVR_UViG_3300025517_000002	100	36	0	0	1	36	13134	13169	1.81e-10	71.9	Engineered;Lab enrichment;Defined media;Unclassified;Engineered;	Sg_081167	45288	Direct terminal repeats (DTRs)	High-quality	Duplodnaviria;Heunggongvirae;Uroviricota;Caudoviricetes;Caudovirales;Siphoviridae;;	Viral RefSeq genes	Bacteria;Firmicutes;Bacilli;Bacillales;Bacillaceae;Bacillus;Bacillus coagulans	CRISPR (near)identical
36D1_4:8	36D1	IMGVR_UViG_3300025517_000002	100	31	0	0	5	35	13832	13862	1.64e-07	61.9	Engineered;Lab enrichment;Defined media;Unclassified;Engineered;	Sg_081167	45288	Direct terminal repeats (DTRs)	High-quality	Duplodnaviria;Heunggongvirae;Uroviricota;Caudoviricetes;Caudovirales;Siphoviridae;;	Viral RefSeq genes	Bacteria;Firmicutes;Bacilli;Bacillales;Bacillaceae;Bacillus;Bacillus coagulans	CRISPR (near)identical
36D1_4:14	36D1	IMGVR_UViG_3300025517_000002	100	37	0	0	1	37	13722	13758	4.88e-11	73.8	Engineered;Lab enrichment;Defined media;Unclassified;Engineered;	Sg_081167	45288	Direct terminal repeats (DTRs)	High-quality	Duplodnaviria;Heunggongvirae;Uroviricota;Caudoviricetes;Caudovirales;Siphoviridae;;	Viral RefSeq genes	Bacteria;Firmicutes;Bacilli;Bacillales;Bacillaceae;Bacillus;Bacillus coagulans	CRISPR (near)identical
36D1_4:33	36D1	IMGVR_UViG_3300025517_000002	97.143	35	1	0	3	37	2549	2583	1.86e-07	61.9	Engineered;Lab enrichment;Defined media;Unclassified;Engineered;	Sg_081167	45288	Direct terminal repeats (DTRs)	High-quality	Duplodnaviria;Heunggongvirae;Uroviricota;Caudoviricetes;Caudovirales;Siphoviridae;;	Viral RefSeq genes	Bacteria;Firmicutes;Bacilli;Bacillales;Bacillaceae;Bacillus;Bacillus coagulans	CRISPR (near)identical
36D1_4:33	36D1	IMGVR_UViG_3300025540_000001	97.143	35	1	0	3	37	10078	10044	1.86e-07	61.9	Engineered;Lab enrichment;Defined media;Unclassified;Engineered;	vOTU_067317	48934	Direct terminal repeats (DTRs)	High-quality	Duplodnaviria;Heunggongvirae;Uroviricota;Caudoviricetes;Caudovirales;;;	Viral RefSeq genes	Bacteria;Firmicutes;Bacilli;Bacillales;Bacillaceae;Bacillus;Bacillus coagulans	CRISPR (near)identical
36D1_4:36	36D1	IMGVR_UViG_3300025540_000001	100	36	0	0	1	36	1383	1348	1.81e-10	71.9	Engineered;Lab enrichment;Defined media;Unclassified;Engineered;	vOTU_067317	48934	Direct terminal repeats (DTRs)	High-quality	Duplodnaviria;Heunggongvirae;Uroviricota;Caudoviricetes;Caudovirales;;;	Viral RefSeq genes	Bacteria;Firmicutes;Bacilli;Bacillales;Bacillaceae;Bacillus;Bacillus coagulans	CRISPR (near)identical
36D1_4:36	36D1	IMGVR_UViG_3300025517_000002	100	36	0	0	1	36	11235	11270	1.81e-10	71.9	Engineered;Lab enrichment;Defined media;Unclassified;Engineered;	Sg_081167	45288	Direct terminal repeats (DTRs)	High-quality	Duplodnaviria;Heunggongvirae;Uroviricota;Caudoviricetes;Caudovirales;Siphoviridae;;	Viral RefSeq genes	Bacteria;Firmicutes;Bacilli;Bacillales;Bacillaceae;Bacillus;Bacillus coagulans	CRISPR (near)identical
36D1_4:37	36D1	IMGVR_UViG_3300002918_000041	100	38	0	0	1	38	5803	5766	1.31e-11	75.8	Engineered;Lab enrichment;Defined media;Unclassified;Engineered;	Sg_632784	9253	Linear contig	Genome fragment	0	0	Bacteria;Firmicutes;Bacilli;Bacillales;Bacillaceae;Bacillus;	Similarity to host genome
36D1_4:37	36D1	IMGVR_UViG_3300025534_000084	100	38	0	0	1	38	5131	5168	1.31e-11	75.8	Engineered;Lab enrichment;Defined media;Unclassified;Engineered;	Sg_767033	7031	Linear contig	Genome fragment	0	0	Bacteria;Firmicutes;Bacilli;Bacillales;Bacillaceae;Bacillus;Bacillus coagulans	CRISPR (near)identical
36D1_4:51	36D1	IMGVR_UViG_3300002951_000003	100	37	0	0	1	37	1866	1902	4.88e-11	73.8	Engineered;Lab enrichment;Defined media;Unclassified;Engineered;	Sg_454728	13683	Linear contig	Genome fragment	Duplodnaviria;Heunggongvirae;Uroviricota;Caudoviricetes;Caudovirales;Siphoviridae;;	Viral RefSeq genes	Bacteria;Firmicutes;Bacilli;Bacillales;Bacillaceae;Bacillus;	CRISPR multiple partial
36D1_4:51	36D1	IMGVR_UViG_3300025541_000002	100	37	0	0	1	37	11788	11752	4.88e-11	73.8	Engineered;Lab enrichment;Defined media;Unclassified;Engineered;	Sg_454728	13641	Linear contig	Genome fragment	Duplodnaviria;Heunggongvirae;Uroviricota;Caudoviricetes;Caudovirales;Siphoviridae;;	Viral RefSeq genes	Bacteria;Firmicutes;Bacilli;Bacillales;Bacillaceae;Bacillus;	Similarity to host genome
36D1_4:51	36D1	IMGVR_UViG_3300025540_000001	100	37	0	0	1	37	41204	41168	4.88e-11	73.8	Engineered;Lab enrichment;Defined media;Unclassified;Engineered;	vOTU_067317	48934	Direct terminal repeats (DTRs)	High-quality	Duplodnaviria;Heunggongvirae;Uroviricota;Caudoviricetes;Caudovirales;;;	Viral RefSeq genes	Bacteria;Firmicutes;Bacilli;Bacillales;Bacillaceae;Bacillus;Bacillus coagulans	CRISPR (near)identical
36D1_4:51	36D1	IMGVR_UViG_3300002951_000001	100	34	0	0	4	37	33859	33826	3.01e-09	67.9	Engineered;Lab enrichment;Defined media;Unclassified;Engineered;	Sg_111311	35384	Linear contig	Genome fragment	Duplodnaviria;Heunggongvirae;Uroviricota;Caudoviricetes;Caudovirales;Siphoviridae;;	Viral RefSeq genes	Bacteria;Firmicutes;Bacilli;Bacillales;Bacillaceae;Bacillus;Bacillus coagulans	CRISPR (near)identical
36D1_4:51	36D1	IMGVR_UViG_3300025523_000001	100	34	0	0	4	37	33538	33505	3.01e-09	67.9	Engineered;Lab enrichment;Defined media;Unclassified;Engineered;	Sg_111311	40402	Direct terminal repeats (DTRs)	High-quality	Duplodnaviria;Heunggongvirae;Uroviricota;Caudoviricetes;Caudovirales;Siphoviridae;;	Viral RefSeq genes	Bacteria;Firmicutes;Bacilli;Bacillales;Bacillaceae;Bacillus;Bacillus coagulans	CRISPR (near)identical
36D1_4:53	36D1	IMGVR_UViG_3300002948_000017	97.143	35	1	0	1	35	2758	2792	1.75e-07	61.9	Engineered;Lab enrichment;Defined media;Unclassified;Engineered;	Sg_475097	13030	Linear contig	Genome fragment	Duplodnaviria;Heunggongvirae;Uroviricota;Caudoviricetes;Caudovirales;Siphoviridae;;	Viral RefSeq genes	Bacteria;Firmicutes;Bacilli;Bacillales;Bacillaceae;Bacillus;Bacillus coagulans	CRISPR (near)identical
36D1_4:60	36D1	GCA_002990925.1	93.939	33	2	0	1	33	88213	88245	0.000624	50.1	NA;NA;NA;NA;NA;NA	Sg_005839	144615	Reference	Reference	Duplodnaviria;Heunggongvirae;Uroviricota;Caudoviricetes;Caudovirales;Herelleviridae;;	Viral RefSeq genes	0	0
36D1_4:65	36D1	IMGVR_UViG_3300025517_000002	96.667	30	1	0	1	30	17470	17441	0.000179	52	Engineered;Lab enrichment;Defined media;Unclassified;Engineered;	Sg_081167	45288	Direct terminal repeats (DTRs)	High-quality	Duplodnaviria;Heunggongvirae;Uroviricota;Caudoviricetes;Caudovirales;Siphoviridae;;	Viral RefSeq genes	Bacteria;Firmicutes;Bacilli;Bacillales;Bacillaceae;Bacillus;Bacillus coagulans	CRISPR (near)identical
36D1_5:1	36D1	IMGVR_UViG_3300025540_000001	91.892	37	3	0	1	37	44882	44918	0.000707	50.1	Engineered;Lab enrichment;Defined media;Unclassified;Engineered;	vOTU_067317	48934	Direct terminal repeats (DTRs)	High-quality	Duplodnaviria;Heunggongvirae;Uroviricota;Caudoviricetes;Caudovirales;;;	Viral RefSeq genes	Bacteria;Firmicutes;Bacilli;Bacillales;Bacillaceae;Bacillus;Bacillus coagulans	CRISPR (near)identical
36D1_5:4	36D1	IMGVR_UViG_3300025519_000003	100	39	0	0	1	39	7426	7464	3.49e-12	77.8	Engineered;Lab enrichment;Defined media;Unclassified;Engineered;	Sg_034541	63811	Linear contig	Unsure (completeness > 120%)	Duplodnaviria;Heunggongvirae;Uroviricota;Caudoviricetes;Caudovirales;Siphoviridae;;	Viral RefSeq genes	Bacteria;Firmicutes;Bacilli;Bacillales;Bacillaceae;Bacillus;	CRISPR (near)identical
36D1_6:8	36D1	DTR_840753	100	27	0	0	13	39	40518	40492	5.06e-05	54	Host-associated;Human;Gut;NA;NA;NA	Sg_100636	41832	Direct terminal repeats (DTRs)	Reference	Duplodnaviria;Heunggongvirae;Uroviricota;Caudoviricetes;Caudovirales;;;	VOGdb markers	0	0
36D1_6:8	36D1	UGV-GENOME-0278465	100	27	0	0	13	39	40518	40492	5.06e-05	54	Host-associated;Human;Digestive system;NA;Host-associated(human);NA	Sg_100636	41931	Direct terminal repeats (DTRs)	High-quality	Duplodnaviria;Heunggongvirae;Uroviricota;Caudoviricetes;Caudovirales;;;	VOGdb markers	0	0
36D1_6:8	36D1	IMGVR_UViG_3300025528_000002	96.774	31	1	0	9	39	16939	16909	5.06e-05	54	Engineered;Lab enrichment;Defined media;Unclassified;Engineered;	Sg_083585	44687	Direct terminal repeats (DTRs)	High-quality	Duplodnaviria;Heunggongvirae;Uroviricota;Caudoviricetes;Caudovirales;Siphoviridae;;	Viral RefSeq genes	Bacteria;Firmicutes;Bacilli;Bacillales;Bacillaceae;;	CRISPR (near)identical
36D1_6:9	36D1	IMGVR_UViG_3300025540_000001	96.875	32	1	0	1	32	8777	8746	1.15e-05	56	Engineered;Lab enrichment;Defined media;Unclassified;Engineered;	vOTU_067317	48934	Direct terminal repeats (DTRs)	High-quality	Duplodnaviria;Heunggongvirae;Uroviricota;Caudoviricetes;Caudovirales;;;	Viral RefSeq genes	Bacteria;Firmicutes;Bacilli;Bacillales;Bacillaceae;Bacillus;Bacillus coagulans	CRISPR (near)identical
36D1_6:9	36D1	IMGVR_UViG_3300025517_000002	96.875	32	1	0	1	32	3850	3881	1.15e-05	56	Engineered;Lab enrichment;Defined media;Unclassified;Engineered;	Sg_081167	45288	Direct terminal repeats (DTRs)	High-quality	Duplodnaviria;Heunggongvirae;Uroviricota;Caudoviricetes;Caudovirales;Siphoviridae;;	Viral RefSeq genes	Bacteria;Firmicutes;Bacilli;Bacillales;Bacillaceae;Bacillus;Bacillus coagulans	CRISPR (near)identical
CSIL1_10:1	CSIL1	IMGVR_UViG_3300002948_000017	97.222	36	1	0	2	37	1661	1626	4.7e-08	63.9	Engineered;Lab enrichment;Defined media;Unclassified;Engineered;	Sg_475097	13030	Linear contig	Genome fragment	Duplodnaviria;Heunggongvirae;Uroviricota;Caudoviricetes;Caudovirales;Siphoviridae;;	Viral RefSeq genes	Bacteria;Firmicutes;Bacilli;Bacillales;Bacillaceae;Bacillus;Bacillus coagulans	CRISPR (near)identical
CSIL1_10:1	CSIL1	IMGVR_UViG_3300002951_000001	94.444	36	2	0	2	37	28660	28695	1.15e-05	56	Engineered;Lab enrichment;Defined media;Unclassified;Engineered;	Sg_111311	35384	Linear contig	Genome fragment	Duplodnaviria;Heunggongvirae;Uroviricota;Caudoviricetes;Caudovirales;Siphoviridae;;	Viral RefSeq genes	Bacteria;Firmicutes;Bacilli;Bacillales;Bacillaceae;Bacillus;Bacillus coagulans	CRISPR (near)identical
CSIL1_10:1	CSIL1	IMGVR_UViG_3300025523_000001	94.444	36	2	0	2	37	28339	28374	1.15e-05	56	Engineered;Lab enrichment;Defined media;Unclassified;Engineered;	Sg_111311	40402	Direct terminal repeats (DTRs)	High-quality	Duplodnaviria;Heunggongvirae;Uroviricota;Caudoviricetes;Caudovirales;Siphoviridae;;	Viral RefSeq genes	Bacteria;Firmicutes;Bacilli;Bacillales;Bacillaceae;Bacillus;Bacillus coagulans	CRISPR (near)identical
DSM1_7:5	DSM1	IMGVR_UViG_3300002951_000001	100	34	0	0	1	34	14281	14248	2.48e-09	67.9	Engineered;Lab enrichment;Defined media;Unclassified;Engineered;	Sg_111311	35384	Linear contig	Genome fragment	Duplodnaviria;Heunggongvirae;Uroviricota;Caudoviricetes;Caudovirales;Siphoviridae;;	Viral RefSeq genes	Bacteria;Firmicutes;Bacilli;Bacillales;Bacillaceae;Bacillus;Bacillus coagulans	CRISPR (near)identical
DSM1_7:5	DSM1	IMGVR_UViG_3300025523_000001	100	34	0	0	1	34	13960	13927	2.48e-09	67.9	Engineered;Lab enrichment;Defined media;Unclassified;Engineered;	Sg_111311	40402	Direct terminal repeats (DTRs)	High-quality	Duplodnaviria;Heunggongvirae;Uroviricota;Caudoviricetes;Caudovirales;Siphoviridae;;	Viral RefSeq genes	Bacteria;Firmicutes;Bacilli;Bacillales;Bacillaceae;Bacillus;Bacillus coagulans	CRISPR (near)identical
DSM1_7:14	DSM1	IMGVR_UViG_3300002951_000001	97.059	34	1	0	1	34	5863	5896	6.04e-07	60	Engineered;Lab enrichment;Defined media;Unclassified;Engineered;	Sg_111311	35384	Linear contig	Genome fragment	Duplodnaviria;Heunggongvirae;Uroviricota;Caudoviricetes;Caudovirales;Siphoviridae;;	Viral RefSeq genes	Bacteria;Firmicutes;Bacilli;Bacillales;Bacillaceae;Bacillus;Bacillus coagulans	CRISPR (near)identical
DSM1_7:14	DSM1	IMGVR_UViG_3300025523_000001	97.059	34	1	0	1	34	5542	5575	6.04e-07	60	Engineered;Lab enrichment;Defined media;Unclassified;Engineered;	Sg_111311	40402	Direct terminal repeats (DTRs)	High-quality	Duplodnaviria;Heunggongvirae;Uroviricota;Caudoviricetes;Caudovirales;Siphoviridae;;	Viral RefSeq genes	Bacteria;Firmicutes;Bacilli;Bacillales;Bacillaceae;Bacillus;Bacillus coagulans	CRISPR (near)identical
DSM1_7:16	DSM1	IMGVR_UViG_3300002951_000001	100	26	0	0	1	26	156	131	0.000137	52	Engineered;Lab enrichment;Defined media;Unclassified;Engineered;	Sg_111311	35384	Linear contig	Genome fragment	Duplodnaviria;Heunggongvirae;Uroviricota;Caudoviricetes;Caudovirales;Siphoviridae;;	Viral RefSeq genes	Bacteria;Firmicutes;Bacilli;Bacillales;Bacillaceae;Bacillus;Bacillus coagulans	CRISPR (near)identical
DSM1_7:16	DSM1	IMGVR_UViG_3300025523_000001	100	26	0	0	1	26	40237	40212	0.000137	52	Engineered;Lab enrichment;Defined media;Unclassified;Engineered;	Sg_111311	40402	Direct terminal repeats (DTRs)	High-quality	Duplodnaviria;Heunggongvirae;Uroviricota;Caudoviricetes;Caudovirales;Siphoviridae;;	Viral RefSeq genes	Bacteria;Firmicutes;Bacilli;Bacillales;Bacillaceae;Bacillus;Bacillus coagulans	CRISPR (near)identical
DSM1_7:21	DSM1	IMGVR_UViG_3300002951_000001	100	34	0	0	1	34	5939	5972	2.48e-09	67.9	Engineered;Lab enrichment;Defined media;Unclassified;Engineered;	Sg_111311	35384	Linear contig	Genome fragment	Duplodnaviria;Heunggongvirae;Uroviricota;Caudoviricetes;Caudovirales;Siphoviridae;;	Viral RefSeq genes	Bacteria;Firmicutes;Bacilli;Bacillales;Bacillaceae;Bacillus;Bacillus coagulans	CRISPR (near)identical
DSM1_7:21	DSM1	IMGVR_UViG_3300025523_000001	100	34	0	0	1	34	5618	5651	2.48e-09	67.9	Engineered;Lab enrichment;Defined media;Unclassified;Engineered;	Sg_111311	40402	Direct terminal repeats (DTRs)	High-quality	Duplodnaviria;Heunggongvirae;Uroviricota;Caudoviricetes;Caudovirales;Siphoviridae;;	Viral RefSeq genes	Bacteria;Firmicutes;Bacilli;Bacillales;Bacillaceae;Bacillus;Bacillus coagulans	CRISPR (near)identical
DSM1_7:22	DSM1	IMGVR_UViG_3300002951_000001	94.444	36	2	0	1	36	24373	24408	1.08e-05	56	Engineered;Lab enrichment;Defined media;Unclassified;Engineered;	Sg_111311	35384	Linear contig	Genome fragment	Duplodnaviria;Heunggongvirae;Uroviricota;Caudoviricetes;Caudovirales;Siphoviridae;;	Viral RefSeq genes	Bacteria;Firmicutes;Bacilli;Bacillales;Bacillaceae;Bacillus;Bacillus coagulans	CRISPR (near)identical
DSM1_7:22	DSM1	IMGVR_UViG_3300025523_000001	94.444	36	2	0	1	36	24052	24087	1.08e-05	56	Engineered;Lab enrichment;Defined media;Unclassified;Engineered;	Sg_111311	40402	Direct terminal repeats (DTRs)	High-quality	Duplodnaviria;Heunggongvirae;Uroviricota;Caudoviricetes;Caudovirales;Siphoviridae;;	Viral RefSeq genes	Bacteria;Firmicutes;Bacilli;Bacillales;Bacillaceae;Bacillus;Bacillus coagulans	CRISPR (near)identical
DSM1_7:24	DSM1	IMGVR_UViG_3300002951_000001	96.97	33	1	0	2	34	20139	20107	2.56e-06	58	Engineered;Lab enrichment;Defined media;Unclassified;Engineered;	Sg_111311	35384	Linear contig	Genome fragment	Duplodnaviria;Heunggongvirae;Uroviricota;Caudoviricetes;Caudovirales;Siphoviridae;;	Viral RefSeq genes	Bacteria;Firmicutes;Bacilli;Bacillales;Bacillaceae;Bacillus;Bacillus coagulans	CRISPR (near)identical
DSM1_7:24	DSM1	IMGVR_UViG_3300002948_000017	96.97	33	1	0	2	34	10115	10147	2.56e-06	58	Engineered;Lab enrichment;Defined media;Unclassified;Engineered;	Sg_475097	13030	Linear contig	Genome fragment	Duplodnaviria;Heunggongvirae;Uroviricota;Caudoviricetes;Caudovirales;Siphoviridae;;	Viral RefSeq genes	Bacteria;Firmicutes;Bacilli;Bacillales;Bacillaceae;Bacillus;Bacillus coagulans	CRISPR (near)identical
DSM1_7:24	DSM1	IMGVR_UViG_3300025523_000001	96.97	33	1	0	2	34	19818	19786	2.56e-06	58	Engineered;Lab enrichment;Defined media;Unclassified;Engineered;	Sg_111311	40402	Direct terminal repeats (DTRs)	High-quality	Duplodnaviria;Heunggongvirae;Uroviricota;Caudoviricetes;Caudovirales;Siphoviridae;;	Viral RefSeq genes	Bacteria;Firmicutes;Bacilli;Bacillales;Bacillaceae;Bacillus;Bacillus coagulans	CRISPR (near)identical
DSM1_7:25	DSM1	IMGVR_UViG_3300002948_000017	97.143	35	1	0	1	35	1737	1703	1.64e-07	61.9	Engineered;Lab enrichment;Defined media;Unclassified;Engineered;	Sg_475097	13030	Linear contig	Genome fragment	Duplodnaviria;Heunggongvirae;Uroviricota;Caudoviricetes;Caudovirales;Siphoviridae;;	Viral RefSeq genes	Bacteria;Firmicutes;Bacilli;Bacillales;Bacillaceae;Bacillus;Bacillus coagulans	CRISPR (near)identical
DSM1_7:25	DSM1	IMGVR_UViG_3300002951_000001	94.286	35	2	0	1	35	28584	28618	3.99e-05	54	Engineered;Lab enrichment;Defined media;Unclassified;Engineered;	Sg_111311	35384	Linear contig	Genome fragment	Duplodnaviria;Heunggongvirae;Uroviricota;Caudoviricetes;Caudovirales;Siphoviridae;;	Viral RefSeq genes	Bacteria;Firmicutes;Bacilli;Bacillales;Bacillaceae;Bacillus;Bacillus coagulans	CRISPR (near)identical
DSM1_7:25	DSM1	IMGVR_UViG_3300025523_000001	94.286	35	2	0	1	35	28263	28297	3.99e-05	54	Engineered;Lab enrichment;Defined media;Unclassified;Engineered;	Sg_111311	40402	Direct terminal repeats (DTRs)	High-quality	Duplodnaviria;Heunggongvirae;Uroviricota;Caudoviricetes;Caudovirales;Siphoviridae;;	Viral RefSeq genes	Bacteria;Firmicutes;Bacilli;Bacillales;Bacillaceae;Bacillus;Bacillus coagulans	CRISPR (near)identical
DSM1_7:27	DSM1	IMGVR_UViG_3300002951_000001	100	29	0	0	4	32	24789	24817	2.05e-06	58	Engineered;Lab enrichment;Defined media;Unclassified;Engineered;	Sg_111311	35384	Linear contig	Genome fragment	Duplodnaviria;Heunggongvirae;Uroviricota;Caudoviricetes;Caudovirales;Siphoviridae;;	Viral RefSeq genes	Bacteria;Firmicutes;Bacilli;Bacillales;Bacillaceae;Bacillus;Bacillus coagulans	CRISPR (near)identical
DSM1_7:27	DSM1	IMGVR_UViG_3300002948_000017	100	29	0	0	4	32	5466	5438	2.05e-06	58	Engineered;Lab enrichment;Defined media;Unclassified;Engineered;	Sg_475097	13030	Linear contig	Genome fragment	Duplodnaviria;Heunggongvirae;Uroviricota;Caudoviricetes;Caudovirales;Siphoviridae;;	Viral RefSeq genes	Bacteria;Firmicutes;Bacilli;Bacillales;Bacillaceae;Bacillus;Bacillus coagulans	CRISPR (near)identical
DSM1_7:27	DSM1	IMGVR_UViG_3300025523_000001	100	29	0	0	4	32	24468	24496	2.05e-06	58	Engineered;Lab enrichment;Defined media;Unclassified;Engineered;	Sg_111311	40402	Direct terminal repeats (DTRs)	High-quality	Duplodnaviria;Heunggongvirae;Uroviricota;Caudoviricetes;Caudovirales;Siphoviridae;;	Viral RefSeq genes	Bacteria;Firmicutes;Bacilli;Bacillales;Bacillaceae;Bacillus;Bacillus coagulans	CRISPR (near)identical
DSM1_7:29	DSM1	IMGVR_UViG_3300002951_000001	100	33	0	0	3	35	27367	27399	1.05e-08	65.9	Engineered;Lab enrichment;Defined media;Unclassified;Engineered;	Sg_111311	35384	Linear contig	Genome fragment	Duplodnaviria;Heunggongvirae;Uroviricota;Caudoviricetes;Caudovirales;Siphoviridae;;	Viral RefSeq genes	Bacteria;Firmicutes;Bacilli;Bacillales;Bacillaceae;Bacillus;Bacillus coagulans	CRISPR (near)identical
DSM1_7:29	DSM1	IMGVR_UViG_3300025523_000001	100	33	0	0	3	35	27046	27078	1.05e-08	65.9	Engineered;Lab enrichment;Defined media;Unclassified;Engineered;	Sg_111311	40402	Direct terminal repeats (DTRs)	High-quality	Duplodnaviria;Heunggongvirae;Uroviricota;Caudoviricetes;Caudovirales;Siphoviridae;;	Viral RefSeq genes	Bacteria;Firmicutes;Bacilli;Bacillales;Bacillaceae;Bacillus;Bacillus coagulans	CRISPR (near)identical
DSM1_7:31	DSM1	IMGVR_UViG_3300002948_000002	100	33	0	0	1	33	29755	29787	9.09e-09	65.9	Engineered;Lab enrichment;Defined media;Unclassified;Engineered;	Sg_034541	48022	Linear contig	High-quality	Duplodnaviria;Heunggongvirae;Uroviricota;Caudoviricetes;Caudovirales;Siphoviridae;;	Viral RefSeq genes	Bacteria;Firmicutes;Bacilli;Bacillales;Bacillaceae;Bacillus;	CRISPR (near)identical
DSM1_7:31	DSM1	IMGVR_UViG_3300025519_000003	100	33	0	0	1	33	43168	43200	9.09e-09	65.9	Engineered;Lab enrichment;Defined media;Unclassified;Engineered;	Sg_034541	63811	Linear contig	Unsure (completeness > 120%)	Duplodnaviria;Heunggongvirae;Uroviricota;Caudoviricetes;Caudovirales;Siphoviridae;;	Viral RefSeq genes	Bacteria;Firmicutes;Bacilli;Bacillales;Bacillaceae;Bacillus;	CRISPR (near)identical
DSM1_7:31	DSM1	IMGVR_UViG_3300025517_000011	100	33	0	0	1	33	60	92	9.09e-09	65.9	Engineered;Lab enrichment;Defined media;Unclassified;Engineered;	vOTU_272350	22937	Integrated provirus	Genome fragment	Duplodnaviria;Heunggongvirae;Uroviricota;Caudoviricetes;Caudovirales;;;	VOGdb markers	Bacteria;Firmicutes;Bacilli;Bacillales;Bacillaceae;;	CRISPR (near)identical
DSM1_7:31	DSM1	IMGVR_UViG_3300002559_000007	96.97	33	1	0	1	33	60	92	5.61e-07	60	Engineered;Lab enrichment;Defined media;Unclassified;Engineered;	vOTU_272350	22939	Integrated provirus	Genome fragment	Duplodnaviria;Heunggongvirae;Uroviricota;Caudoviricetes;Caudovirales;;;	VOGdb markers	Bacteria;Firmicutes;Bacilli;Bacillales;Bacillaceae;;	CRISPR (near)identical
DSM1_7:31	DSM1	IMGVR_UViG_3300017990_000020	96.97	33	1	0	1	33	7885	7917	2.22e-06	58	Environmental;Aquatic;Non-marine Saline and Alkaline;Hypersaline;Aquatic(sediment);	Sg_051916	54914	Linear contig	High-quality	Duplodnaviria;Heunggongvirae;Uroviricota;Caudoviricetes;Caudovirales;Siphoviridae;;	Viral RefSeq genes	Bacteria;Firmicutes;Bacilli;Bacillales;Bacillaceae;;	CRISPR (near)identical
DSM1_7:37	DSM1	IMGVR_UViG_3300025540_000001	94.118	34	2	0	1	34	15265	15298	0.000147	52	Engineered;Lab enrichment;Defined media;Unclassified;Engineered;	vOTU_067317	48934	Direct terminal repeats (DTRs)	High-quality	Duplodnaviria;Heunggongvirae;Uroviricota;Caudoviricetes;Caudovirales;;;	Viral RefSeq genes	Bacteria;Firmicutes;Bacilli;Bacillales;Bacillaceae;Bacillus;Bacillus coagulans	CRISPR (near)identical
DSM1_7:39	DSM1	IMGVR_UViG_3300025540_000001	100	30	0	0	1	30	46531	46560	6.04e-07	60	Engineered;Lab enrichment;Defined media;Unclassified;Engineered;	vOTU_067317	48934	Direct terminal repeats (DTRs)	High-quality	Duplodnaviria;Heunggongvirae;Uroviricota;Caudoviricetes;Caudovirales;;;	Viral RefSeq genes	Bacteria;Firmicutes;Bacilli;Bacillales;Bacillaceae;Bacillus;Bacillus coagulans	CRISPR (near)identical
DSM1_7:43	DSM1	IMGVR_UViG_3300025517_000002	100	34	0	0	1	34	14367	14400	2.48e-09	67.9	Engineered;Lab enrichment;Defined media;Unclassified;Engineered;	Sg_081167	45288	Direct terminal repeats (DTRs)	High-quality	Duplodnaviria;Heunggongvirae;Uroviricota;Caudoviricetes;Caudovirales;Siphoviridae;;	Viral RefSeq genes	Bacteria;Firmicutes;Bacilli;Bacillales;Bacillaceae;Bacillus;Bacillus coagulans	CRISPR (near)identical
DSM1_7:43	DSM1	IMGVR_UViG_3300002951_000001	100	34	0	0	1	34	1766	1733	2.48e-09	67.9	Engineered;Lab enrichment;Defined media;Unclassified;Engineered;	Sg_111311	35384	Linear contig	Genome fragment	Duplodnaviria;Heunggongvirae;Uroviricota;Caudoviricetes;Caudovirales;Siphoviridae;;	Viral RefSeq genes	Bacteria;Firmicutes;Bacilli;Bacillales;Bacillaceae;Bacillus;Bacillus coagulans	CRISPR (near)identical
DSM1_7:43	DSM1	IMGVR_UViG_3300025523_000001	100	34	0	0	1	34	1445	1412	2.48e-09	67.9	Engineered;Lab enrichment;Defined media;Unclassified;Engineered;	Sg_111311	40402	Direct terminal repeats (DTRs)	High-quality	Duplodnaviria;Heunggongvirae;Uroviricota;Caudoviricetes;Caudovirales;Siphoviridae;;	Viral RefSeq genes	Bacteria;Firmicutes;Bacilli;Bacillales;Bacillaceae;Bacillus;Bacillus coagulans	CRISPR (near)identical
DSM1_7:43	DSM1	IMGVR_UViG_3300025540_000001	100	33	0	0	1	33	48696	48664	9.79e-09	65.9	Engineered;Lab enrichment;Defined media;Unclassified;Engineered;	vOTU_067317	48934	Direct terminal repeats (DTRs)	High-quality	Duplodnaviria;Heunggongvirae;Uroviricota;Caudoviricetes;Caudovirales;;;	Viral RefSeq genes	Bacteria;Firmicutes;Bacilli;Bacillales;Bacillaceae;Bacillus;Bacillus coagulans	CRISPR (near)identical
DSM1_8:13	DSM1	IMGVR_UViG_3300025517_000002	97.297	37	1	0	1	37	23308	23272	1.19e-08	65.9	Engineered;Lab enrichment;Defined media;Unclassified;Engineered;	Sg_081167	45288	Direct terminal repeats (DTRs)	High-quality	Duplodnaviria;Heunggongvirae;Uroviricota;Caudoviricetes;Caudovirales;Siphoviridae;;	Viral RefSeq genes	Bacteria;Firmicutes;Bacilli;Bacillales;Bacillaceae;Bacillus;Bacillus coagulans	CRISPR (near)identical
DSM1_8:13	DSM1	IMGVR_UViG_3300002951_000003	94.595	37	2	0	1	37	2499	2463	2.9e-06	58	Engineered;Lab enrichment;Defined media;Unclassified;Engineered;	Sg_454728	13683	Linear contig	Genome fragment	Duplodnaviria;Heunggongvirae;Uroviricota;Caudoviricetes;Caudovirales;Siphoviridae;;	Viral RefSeq genes	Bacteria;Firmicutes;Bacilli;Bacillales;Bacillaceae;Bacillus;	CRISPR multiple partial
DSM1_8:13	DSM1	IMGVR_UViG_3300025541_000002	94.595	37	2	0	1	37	11155	11191	2.9e-06	58	Engineered;Lab enrichment;Defined media;Unclassified;Engineered;	Sg_454728	13641	Linear contig	Genome fragment	Duplodnaviria;Heunggongvirae;Uroviricota;Caudoviricetes;Caudovirales;Siphoviridae;;	Viral RefSeq genes	Bacteria;Firmicutes;Bacilli;Bacillales;Bacillaceae;Bacillus;	Similarity to host genome
DSM1_8:14	DSM1	IMGVR_UViG_3300024520_000776	100	27	0	0	4	30	6810	6836	3.99e-05	54	Environmental;Aquatic;Marine;Inlet;Marine;	Sg_395751	15867	Linear contig	Genome fragment	Duplodnaviria;Heunggongvirae;Uroviricota;Caudoviricetes;Caudovirales;Siphoviridae;;	Viral RefSeq genes	0	0
DSM1_8:19	DSM1	IMGVR_UViG_3300025517_000002	100	35	0	0	1	35	12230	12264	6.72e-10	69.9	Engineered;Lab enrichment;Defined media;Unclassified;Engineered;	Sg_081167	45288	Direct terminal repeats (DTRs)	High-quality	Duplodnaviria;Heunggongvirae;Uroviricota;Caudoviricetes;Caudovirales;Siphoviridae;;	Viral RefSeq genes	Bacteria;Firmicutes;Bacilli;Bacillales;Bacillaceae;Bacillus;Bacillus coagulans	CRISPR (near)identical
DSM1_8:19	DSM1	IMGVR_UViG_3300025540_000001	100	35	0	0	1	35	388	354	6.72e-10	69.9	Engineered;Lab enrichment;Defined media;Unclassified;Engineered;	vOTU_067317	48934	Direct terminal repeats (DTRs)	High-quality	Duplodnaviria;Heunggongvirae;Uroviricota;Caudoviricetes;Caudovirales;;;	Viral RefSeq genes	Bacteria;Firmicutes;Bacilli;Bacillales;Bacillaceae;Bacillus;Bacillus coagulans	CRISPR (near)identical
DSM1_8:24	DSM1	IMGVR_UViG_3300025540_000001	96.667	30	1	0	7	36	15390	15361	0.000168	52	Engineered;Lab enrichment;Defined media;Unclassified;Engineered;	vOTU_067317	48934	Direct terminal repeats (DTRs)	High-quality	Duplodnaviria;Heunggongvirae;Uroviricota;Caudoviricetes;Caudovirales;;;	Viral RefSeq genes	Bacteria;Firmicutes;Bacilli;Bacillales;Bacillaceae;Bacillus;Bacillus coagulans	CRISPR (near)identical
DSM1_8:25	DSM1	IMGVR_UViG_3300025519_000006	100	35	0	0	1	35	36293	36259	6.72e-10	69.9	Engineered;Lab enrichment;Defined media;Unclassified;Engineered;	Sg_105915	41159	Linear contig	High-quality	Duplodnaviria;Heunggongvirae;Uroviricota;Caudoviricetes;Caudovirales;Siphoviridae;;	Viral RefSeq genes	Bacteria;Firmicutes;Bacilli;Bacillales;Bacillaceae;Bacillus;	Similarity to host genome
H-1_16:2	H-1	IMGVR_UViG_3300002949_000004	100	31	0	0	7	37	3998	4028	1.86e-07	61.9	Engineered;Lab enrichment;Defined media;Unclassified;Engineered;	Sg_227167	26955	Linear contig	Genome fragment	Duplodnaviria;Heunggongvirae;Uroviricota;Caudoviricetes;Caudovirales;Siphoviridae;;	Viral RefSeq genes	Bacteria;Firmicutes;Bacilli;Bacillales;Bacillaceae;Bacillus;	Similarity to host genome
H-1_16:2	H-1	IMGVR_UViG_3300025540_000005	100	31	0	0	7	37	22984	22954	1.86e-07	61.9	Engineered;Lab enrichment;Defined media;Unclassified;Engineered;	Sg_227167	27007	Linear contig	Genome fragment	Duplodnaviria;Heunggongvirae;Uroviricota;Caudoviricetes;Caudovirales;Siphoviridae;;	Viral RefSeq genes	Bacteria;Firmicutes;Bacilli;Bacillales;Bacillaceae;Bacillus;	Similarity to host genome
H-1_16:2	H-1	IMGVR_UViG_3300025517_000005	100	29	0	0	9	37	31780	31752	2.9e-06	58	Engineered;Lab enrichment;Defined media;Unclassified;Engineered;	vOTU_172191	32976	Direct terminal repeats (DTRs)	High-quality	Duplodnaviria;Heunggongvirae;Uroviricota;Caudoviricetes;Caudovirales;Siphoviridae;;	Viral RefSeq genes	Bacteria;Firmicutes;Bacilli;Bacillales;Bacillaceae;Bacillus;	Similarity to host genome
H-1_16:7	H-1	IMGVR_UViG_3300002951_000001	94.444	36	2	0	1	36	2796	2761	1.08e-05	56	Engineered;Lab enrichment;Defined media;Unclassified;Engineered;	Sg_111311	35384	Linear contig	Genome fragment	Duplodnaviria;Heunggongvirae;Uroviricota;Caudoviricetes;Caudovirales;Siphoviridae;;	Viral RefSeq genes	Bacteria;Firmicutes;Bacilli;Bacillales;Bacillaceae;Bacillus;Bacillus coagulans	CRISPR (near)identical
H-1_16:7	H-1	IMGVR_UViG_3300025523_000001	94.444	36	2	0	1	36	2475	2440	1.08e-05	56	Engineered;Lab enrichment;Defined media;Unclassified;Engineered;	Sg_111311	40402	Direct terminal repeats (DTRs)	High-quality	Duplodnaviria;Heunggongvirae;Uroviricota;Caudoviricetes;Caudovirales;Siphoviridae;;	Viral RefSeq genes	Bacteria;Firmicutes;Bacilli;Bacillales;Bacillaceae;Bacillus;Bacillus coagulans	CRISPR (near)identical
H-1_16:9	H-1	IMGVR_UViG_3300002948_000017	100	36	0	0	1	36	5803	5838	1.81e-10	71.9	Engineered;Lab enrichment;Defined media;Unclassified;Engineered;	Sg_475097	13030	Linear contig	Genome fragment	Duplodnaviria;Heunggongvirae;Uroviricota;Caudoviricetes;Caudovirales;Siphoviridae;;	Viral RefSeq genes	Bacteria;Firmicutes;Bacilli;Bacillales;Bacillaceae;Bacillus;Bacillus coagulans	CRISPR (near)identical
H-1_16:9	H-1	IMGVR_UViG_3300002951_000001	97.222	36	1	0	1	36	24451	24416	4.42e-08	63.9	Engineered;Lab enrichment;Defined media;Unclassified;Engineered;	Sg_111311	35384	Linear contig	Genome fragment	Duplodnaviria;Heunggongvirae;Uroviricota;Caudoviricetes;Caudovirales;Siphoviridae;;	Viral RefSeq genes	Bacteria;Firmicutes;Bacilli;Bacillales;Bacillaceae;Bacillus;Bacillus coagulans	CRISPR (near)identical
H-1_16:9	H-1	IMGVR_UViG_3300025523_000001	97.222	36	1	0	1	36	24130	24095	4.42e-08	63.9	Engineered;Lab enrichment;Defined media;Unclassified;Engineered;	Sg_111311	40402	Direct terminal repeats (DTRs)	High-quality	Duplodnaviria;Heunggongvirae;Uroviricota;Caudoviricetes;Caudovirales;Siphoviridae;;	Viral RefSeq genes	Bacteria;Firmicutes;Bacilli;Bacillales;Bacillaceae;Bacillus;Bacillus coagulans	CRISPR (near)identical
H-1_16:10	H-1	IMGVR_UViG_3300025517_000002	100	35	0	0	1	35	14956	14922	6.72e-10	69.9	Engineered;Lab enrichment;Defined media;Unclassified;Engineered;	Sg_081167	45288	Direct terminal repeats (DTRs)	High-quality	Duplodnaviria;Heunggongvirae;Uroviricota;Caudoviricetes;Caudovirales;Siphoviridae;;	Viral RefSeq genes	Bacteria;Firmicutes;Bacilli;Bacillales;Bacillaceae;Bacillus;Bacillus coagulans	CRISPR (near)identical
H-1_16:10	H-1	IMGVR_UViG_3300002951_000001	94.286	35	2	0	1	35	1180	1214	3.99e-05	54	Engineered;Lab enrichment;Defined media;Unclassified;Engineered;	Sg_111311	35384	Linear contig	Genome fragment	Duplodnaviria;Heunggongvirae;Uroviricota;Caudoviricetes;Caudovirales;Siphoviridae;;	Viral RefSeq genes	Bacteria;Firmicutes;Bacilli;Bacillales;Bacillaceae;Bacillus;Bacillus coagulans	CRISPR (near)identical
H-1_16:10	H-1	IMGVR_UViG_3300025540_000001	94.286	35	2	0	1	35	48106	48140	3.99e-05	54	Engineered;Lab enrichment;Defined media;Unclassified;Engineered;	vOTU_067317	48934	Direct terminal repeats (DTRs)	High-quality	Duplodnaviria;Heunggongvirae;Uroviricota;Caudoviricetes;Caudovirales;;;	Viral RefSeq genes	Bacteria;Firmicutes;Bacilli;Bacillales;Bacillaceae;Bacillus;Bacillus coagulans	CRISPR (near)identical
H-1_16:10	H-1	IMGVR_UViG_3300025523_000001	94.286	35	2	0	1	35	859	893	3.99e-05	54	Engineered;Lab enrichment;Defined media;Unclassified;Engineered;	Sg_111311	40402	Direct terminal repeats (DTRs)	High-quality	Duplodnaviria;Heunggongvirae;Uroviricota;Caudoviricetes;Caudovirales;Siphoviridae;;	Viral RefSeq genes	Bacteria;Firmicutes;Bacilli;Bacillales;Bacillaceae;Bacillus;Bacillus coagulans	CRISPR (near)identical
H-1_16:16	H-1	IMGVR_UViG_3300025540_000001	94.286	35	2	0	1	35	4213	4247	3.99e-05	54	Engineered;Lab enrichment;Defined media;Unclassified;Engineered;	vOTU_067317	48934	Direct terminal repeats (DTRs)	High-quality	Duplodnaviria;Heunggongvirae;Uroviricota;Caudoviricetes;Caudovirales;;;	Viral RefSeq genes	Bacteria;Firmicutes;Bacilli;Bacillales;Bacillaceae;Bacillus;Bacillus coagulans	CRISPR (near)identical
H-1_16:16	H-1	IMGVR_UViG_3300025517_000002	94.286	35	2	0	1	35	8414	8380	3.99e-05	54	Engineered;Lab enrichment;Defined media;Unclassified;Engineered;	Sg_081167	45288	Direct terminal repeats (DTRs)	High-quality	Duplodnaviria;Heunggongvirae;Uroviricota;Caudoviricetes;Caudovirales;Siphoviridae;;	Viral RefSeq genes	Bacteria;Firmicutes;Bacilli;Bacillales;Bacillaceae;Bacillus;Bacillus coagulans	CRISPR (near)identical
H-1_16:17	H-1	IMGVR_UViG_3300025517_000002	100	36	0	0	1	36	15433	15398	1.81e-10	71.9	Engineered;Lab enrichment;Defined media;Unclassified;Engineered;	Sg_081167	45288	Direct terminal repeats (DTRs)	High-quality	Duplodnaviria;Heunggongvirae;Uroviricota;Caudoviricetes;Caudovirales;Siphoviridae;;	Viral RefSeq genes	Bacteria;Firmicutes;Bacilli;Bacillales;Bacillaceae;Bacillus;Bacillus coagulans	CRISPR (near)identical
H-1_16:17	H-1	IMGVR_UViG_3300025540_000001	100	36	0	0	1	36	47629	47664	1.81e-10	71.9	Engineered;Lab enrichment;Defined media;Unclassified;Engineered;	vOTU_067317	48934	Direct terminal repeats (DTRs)	High-quality	Duplodnaviria;Heunggongvirae;Uroviricota;Caudoviricetes;Caudovirales;;;	Viral RefSeq genes	Bacteria;Firmicutes;Bacilli;Bacillales;Bacillaceae;Bacillus;Bacillus coagulans	CRISPR (near)identical
H-1_16:17	H-1	IMGVR_UViG_3300002951_000001	97.222	36	1	0	1	36	703	738	4.42e-08	63.9	Engineered;Lab enrichment;Defined media;Unclassified;Engineered;	Sg_111311	35384	Linear contig	Genome fragment	Duplodnaviria;Heunggongvirae;Uroviricota;Caudoviricetes;Caudovirales;Siphoviridae;;	Viral RefSeq genes	Bacteria;Firmicutes;Bacilli;Bacillales;Bacillaceae;Bacillus;Bacillus coagulans	CRISPR (near)identical
H-1_16:17	H-1	IMGVR_UViG_3300025523_000001	97.222	36	1	0	1	36	382	417	4.42e-08	63.9	Engineered;Lab enrichment;Defined media;Unclassified;Engineered;	Sg_111311	40402	Direct terminal repeats (DTRs)	High-quality	Duplodnaviria;Heunggongvirae;Uroviricota;Caudoviricetes;Caudovirales;Siphoviridae;;	Viral RefSeq genes	Bacteria;Firmicutes;Bacilli;Bacillales;Bacillaceae;Bacillus;Bacillus coagulans	CRISPR (near)identical
H-1_16:21	H-1	IMGVR_UViG_3300025540_000001	100	35	0	0	1	35	14759	14725	6.72e-10	69.9	Engineered;Lab enrichment;Defined media;Unclassified;Engineered;	vOTU_067317	48934	Direct terminal repeats (DTRs)	High-quality	Duplodnaviria;Heunggongvirae;Uroviricota;Caudoviricetes;Caudovirales;;;	Viral RefSeq genes	Bacteria;Firmicutes;Bacilli;Bacillales;Bacillaceae;Bacillus;Bacillus coagulans	CRISPR (near)identical
H-1_17:3	H-1	IMGVR_UViG_3300025517_000002	97.143	35	1	0	3	37	29081	29115	1.86e-07	61.9	Engineered;Lab enrichment;Defined media;Unclassified;Engineered;	Sg_081167	45288	Direct terminal repeats (DTRs)	High-quality	Duplodnaviria;Heunggongvirae;Uroviricota;Caudoviricetes;Caudovirales;Siphoviridae;;	Viral RefSeq genes	Bacteria;Firmicutes;Bacilli;Bacillales;Bacillaceae;Bacillus;Bacillus coagulans	CRISPR (near)identical
H-1_17:4	H-1	IMGVR_UViG_3300002948_000021	96.97	33	1	0	1	33	2376	2408	2.73e-06	58	Engineered;Lab enrichment;Defined media;Unclassified;Engineered;	Sg_777718	6878	Linear contig	Genome fragment	Duplodnaviria;Heunggongvirae;Uroviricota;Caudoviricetes;Caudovirales;Siphoviridae;Sextaecvirus;	Viral RefSeq genes	0	0
H-1_17:4	H-1	IMGVR_UViG_3300002948_000014	96.97	33	1	0	1	33	4411	4379	2.73e-06	58	Engineered;Lab enrichment;Defined media;Unclassified;Engineered;	Sg_270538	14827	Linear contig	Genome fragment	Duplodnaviria;Heunggongvirae;Uroviricota;Caudoviricetes;Caudovirales;Siphoviridae;Sextaecvirus;	Viral RefSeq genes	Bacteria;Firmicutes;Bacilli;Bacillales;Bacillaceae;Bacillus;	Consensus vOTU host
H-1_17:4	H-1	IMGVR_UViG_3300025519_000015	96.97	33	1	0	1	33	10986	10954	2.73e-06	58	Engineered;Lab enrichment;Defined media;Unclassified;Engineered;	Sg_270538	23078	Linear contig	Genome fragment	Duplodnaviria;Heunggongvirae;Uroviricota;Caudoviricetes;Caudovirales;Siphoviridae;;	Viral RefSeq genes	Bacteria;Firmicutes;Bacilli;Bacillales;Bacillaceae;Bacillus;	CRISPR multiple partial
H-1_17:4	H-1	IMGVR_UViG_3300021400_000715	96.552	29	1	0	8	36	36444	36416	0.000665	50.1	Host-associated;Mammals;Digestive system;Foregut;Host-associated(other);	Sg_133327	37594	Linear contig	High-quality	Duplodnaviria;Heunggongvirae;Uroviricota;Caudoviricetes;Caudovirales;;;	VOGdb markers	0	0
H-1_17:13	H-1	IMGVR_UViG_3300025517_000002	97.222	36	1	0	1	36	22957	22992	4.42e-08	63.9	Engineered;Lab enrichment;Defined media;Unclassified;Engineered;	Sg_081167	45288	Direct terminal repeats (DTRs)	High-quality	Duplodnaviria;Heunggongvirae;Uroviricota;Caudoviricetes;Caudovirales;Siphoviridae;;	Viral RefSeq genes	Bacteria;Firmicutes;Bacilli;Bacillales;Bacillaceae;Bacillus;Bacillus coagulans	CRISPR (near)identical
H-1_17:13	H-1	IMGVR_UViG_3300025541_000002	100	28	0	0	1	28	11506	11479	1.08e-05	56	Engineered;Lab enrichment;Defined media;Unclassified;Engineered;	Sg_454728	13641	Linear contig	Genome fragment	Duplodnaviria;Heunggongvirae;Uroviricota;Caudoviricetes;Caudovirales;Siphoviridae;;	Viral RefSeq genes	Bacteria;Firmicutes;Bacilli;Bacillales;Bacillaceae;Bacillus;	Similarity to host genome
H-1_17:13	H-1	IMGVR_UViG_3300002951_000003	100	28	0	0	1	28	2148	2175	1.08e-05	56	Engineered;Lab enrichment;Defined media;Unclassified;Engineered;	Sg_454728	13683	Linear contig	Genome fragment	Duplodnaviria;Heunggongvirae;Uroviricota;Caudoviricetes;Caudovirales;Siphoviridae;;	Viral RefSeq genes	Bacteria;Firmicutes;Bacilli;Bacillales;Bacillaceae;Bacillus;	CRISPR multiple partial
H-1_17:21	H-1	IMGVR_UViG_3300020048_000208	100	25	0	0	2	26	25132	25156	0.000624	50.1	Environmental;Aquatic;Freshwater;Lake;Aquatic(sediment);	Sg_073795	47002	Linear contig	Genome fragment	0	0	0	0
H-1_17:26	H-1	IMGVR_UViG_3300035670_001753	97.222	36	1	0	1	36	12183	12218	4.42e-08	63.9	Environmental;Terrestrial;Deep subsurface;Unclassified;Terrestrial(other);	Sg_360928	17426	Linear contig	Genome fragment	Duplodnaviria;Heunggongvirae;Uroviricota;Caudoviricetes;Caudovirales;Siphoviridae;;	Viral RefSeq genes	Bacteria;Firmicutes;Bacilli;Bacillales;Bacillaceae;Anoxybacillus;Anoxybacillus flavithermus	CRISPR (near)identical
H-1_17:26	H-1	IMGVR_UViG_3300002559_000008	94.444	36	2	0	1	36	18263	18298	1.08e-05	56	Engineered;Lab enrichment;Defined media;Unclassified;Engineered;	Sg_302375	20771	Linear contig	Genome fragment	Duplodnaviria;Heunggongvirae;Uroviricota;Caudoviricetes;Caudovirales;Siphoviridae;;	Viral RefSeq genes	0	0
H-1_17:26	H-1	IMGVR_UViG_3300002541_000021	94.444	36	2	0	1	36	18263	18298	1.08e-05	56	Engineered;Lab enrichment;Defined media;Unclassified;Engineered;	Sg_302375	20771	Linear contig	Genome fragment	Duplodnaviria;Heunggongvirae;Uroviricota;Caudoviricetes;Caudovirales;Siphoviridae;;	Viral RefSeq genes	0	0
H-1_17:28	H-1	IMGVR_UViG_3300025517_000002	97.222	36	1	0	1	36	26982	26947	4.42e-08	63.9	Engineered;Lab enrichment;Defined media;Unclassified;Engineered;	Sg_081167	45288	Direct terminal repeats (DTRs)	High-quality	Duplodnaviria;Heunggongvirae;Uroviricota;Caudoviricetes;Caudovirales;Siphoviridae;;	Viral RefSeq genes	Bacteria;Firmicutes;Bacilli;Bacillales;Bacillaceae;Bacillus;Bacillus coagulans	CRISPR (near)identical
H-1_17:30	H-1	IMGVR_UViG_3300025530_000007	100	27	0	0	10	36	91215	91189	4.26e-05	54	Engineered;Lab enrichment;Defined media;Unclassified;Engineered;	Sg_012937	91670	Integrated provirus	Genome fragment	Duplodnaviria;Heunggongvirae;Uroviricota;Caudoviricetes;Caudovirales;Siphoviridae;;	Viral RefSeq genes	0	0
H-1_17:30	H-1	IMGVR_UViG_3300025529_000004	100	27	0	0	10	36	10391	10417	4.26e-05	54	Engineered;Lab enrichment;Defined media;Unclassified;Engineered;	Sg_012937	101547	Integrated provirus	Genome fragment	Duplodnaviria;Heunggongvirae;Uroviricota;Caudoviricetes;Caudovirales;Siphoviridae;;	Viral RefSeq genes	0	0
H-1_17:30	H-1	IMGVR_UViG_3300002542_000123	100	27	0	0	10	36	6512	6486	4.26e-05	54	Engineered;Lab enrichment;Defined media;Unclassified;Engineered;	Sg_012937	6640	Linear contig	Genome fragment	Duplodnaviria;Heunggongvirae;Uroviricota;Caudoviricetes;Caudovirales;;;	Viral RefSeq genes	0	0
H-1_17:30	H-1	IMGVR_UViG_3300002541_000052	100	27	0	0	10	36	376	402	4.26e-05	54	Engineered;Lab enrichment;Defined media;Unclassified;Engineered;	Sg_012937	11011	Linear contig	Genome fragment	Duplodnaviria;Heunggongvirae;Uroviricota;Caudoviricetes;Caudovirales;Siphoviridae;;	Viral RefSeq genes	0	0
H-1_17:32	H-1	IMGVR_UViG_3300002951_000001	100	36	0	0	1	36	13136	13171	1.81e-10	71.9	Engineered;Lab enrichment;Defined media;Unclassified;Engineered;	Sg_111311	35384	Linear contig	Genome fragment	Duplodnaviria;Heunggongvirae;Uroviricota;Caudoviricetes;Caudovirales;Siphoviridae;;	Viral RefSeq genes	Bacteria;Firmicutes;Bacilli;Bacillales;Bacillaceae;Bacillus;Bacillus coagulans	CRISPR (near)identical
H-1_17:32	H-1	IMGVR_UViG_3300025523_000001	100	36	0	0	1	36	12815	12850	1.81e-10	71.9	Engineered;Lab enrichment;Defined media;Unclassified;Engineered;	Sg_111311	40402	Direct terminal repeats (DTRs)	High-quality	Duplodnaviria;Heunggongvirae;Uroviricota;Caudoviricetes;Caudovirales;Siphoviridae;;	Viral RefSeq genes	Bacteria;Firmicutes;Bacilli;Bacillales;Bacillaceae;Bacillus;Bacillus coagulans	CRISPR (near)identical
H-1_17:38	H-1	IMGVR_UViG_3300017990_000020	96.774	31	1	0	6	36	38292	38322	4.26e-05	54	Environmental;Aquatic;Non-marine Saline and Alkaline;Hypersaline;Aquatic(sediment);	Sg_051916	54914	Linear contig	High-quality	Duplodnaviria;Heunggongvirae;Uroviricota;Caudoviricetes;Caudovirales;Siphoviridae;;	Viral RefSeq genes	Bacteria;Firmicutes;Bacilli;Bacillales;Bacillaceae;;	CRISPR (near)identical
H-1_17:40	H-1	IMGVR_UViG_3300025517_000002	100	36	0	0	1	36	23791	23826	1.81e-10	71.9	Engineered;Lab enrichment;Defined media;Unclassified;Engineered;	Sg_081167	45288	Direct terminal repeats (DTRs)	High-quality	Duplodnaviria;Heunggongvirae;Uroviricota;Caudoviricetes;Caudovirales;Siphoviridae;;	Viral RefSeq genes	Bacteria;Firmicutes;Bacilli;Bacillales;Bacillaceae;Bacillus;Bacillus coagulans	CRISPR (near)identical
H-1_17:40	H-1	IMGVR_UViG_3300025541_000002	100	28	0	0	9	36	10661	10634	1.08e-05	56	Engineered;Lab enrichment;Defined media;Unclassified;Engineered;	Sg_454728	13641	Linear contig	Genome fragment	Duplodnaviria;Heunggongvirae;Uroviricota;Caudoviricetes;Caudovirales;Siphoviridae;;	Viral RefSeq genes	Bacteria;Firmicutes;Bacilli;Bacillales;Bacillaceae;Bacillus;	Similarity to host genome
H-1_17:40	H-1	IMGVR_UViG_3300002951_000003	100	28	0	0	9	36	2993	3020	1.08e-05	56	Engineered;Lab enrichment;Defined media;Unclassified;Engineered;	Sg_454728	13683	Linear contig	Genome fragment	Duplodnaviria;Heunggongvirae;Uroviricota;Caudoviricetes;Caudovirales;Siphoviridae;;	Viral RefSeq genes	Bacteria;Firmicutes;Bacilli;Bacillales;Bacillaceae;Bacillus;	CRISPR multiple partial
H-1_17:45	H-1	IMGVR_UViG_3300002951_000001	100	32	0	0	5	36	4843	4812	4.42e-08	63.9	Engineered;Lab enrichment;Defined media;Unclassified;Engineered;	Sg_111311	35384	Linear contig	Genome fragment	Duplodnaviria;Heunggongvirae;Uroviricota;Caudoviricetes;Caudovirales;Siphoviridae;;	Viral RefSeq genes	Bacteria;Firmicutes;Bacilli;Bacillales;Bacillaceae;Bacillus;Bacillus coagulans	CRISPR (near)identical
H-1_17:45	H-1	IMGVR_UViG_3300025523_000001	100	32	0	0	5	36	4522	4491	4.42e-08	63.9	Engineered;Lab enrichment;Defined media;Unclassified;Engineered;	Sg_111311	40402	Direct terminal repeats (DTRs)	High-quality	Duplodnaviria;Heunggongvirae;Uroviricota;Caudoviricetes;Caudovirales;Siphoviridae;;	Viral RefSeq genes	Bacteria;Firmicutes;Bacilli;Bacillales;Bacillaceae;Bacillus;Bacillus coagulans	CRISPR (near)identical
H-1_17:46	H-1	IMGVR_UViG_3300025517_000002	97.222	36	1	0	1	36	26041	26076	4.42e-08	63.9	Engineered;Lab enrichment;Defined media;Unclassified;Engineered;	Sg_081167	45288	Direct terminal repeats (DTRs)	High-quality	Duplodnaviria;Heunggongvirae;Uroviricota;Caudoviricetes;Caudovirales;Siphoviridae;;	Viral RefSeq genes	Bacteria;Firmicutes;Bacilli;Bacillales;Bacillaceae;Bacillus;Bacillus coagulans	CRISPR (near)identical
H-1_17:48	H-1	IMGVR_UViG_3300002951_000001	100	34	0	0	1	34	9822	9855	2.48e-09	67.9	Engineered;Lab enrichment;Defined media;Unclassified;Engineered;	Sg_111311	35384	Linear contig	Genome fragment	Duplodnaviria;Heunggongvirae;Uroviricota;Caudoviricetes;Caudovirales;Siphoviridae;;	Viral RefSeq genes	Bacteria;Firmicutes;Bacilli;Bacillales;Bacillaceae;Bacillus;Bacillus coagulans	CRISPR (near)identical
H-1_17:48	H-1	IMGVR_UViG_3300025523_000001	100	34	0	0	1	34	9501	9534	2.48e-09	67.9	Engineered;Lab enrichment;Defined media;Unclassified;Engineered;	Sg_111311	40402	Direct terminal repeats (DTRs)	High-quality	Duplodnaviria;Heunggongvirae;Uroviricota;Caudoviricetes;Caudovirales;Siphoviridae;;	Viral RefSeq genes	Bacteria;Firmicutes;Bacilli;Bacillales;Bacillaceae;Bacillus;Bacillus coagulans	CRISPR (near)identical
H-1_18:3	H-1	UGV-GENOME-0316177_1	96.774	31	1	0	3	33	28634	28604	3.46e-05	54	Host-associated;Human;Digestive system;NA;Host-associated(human);NA	vOTU_126219	38455	Linear contig	Unsure (completeness > 120%)	Duplodnaviria;Heunggongvirae;Uroviricota;Caudoviricetes;Caudovirales;;;	VOGdb markers via vOTU	Bacteria;Firmicutes;Negativicutes;Veillonellales;Veillonellaceae;Veillonella;	Similarity to host genome
H-1_18:3	H-1	UGV-GENOME-0281043_1	96.774	31	1	0	1	31	38105	38075	3.46e-05	54	Host-associated;Human;Digestive system;NA;Host-associated(human);NA	Sg_108346	40815	Linear contig	High-quality	Duplodnaviria;Heunggongvirae;Uroviricota;Caudoviricetes;Caudovirales;;;	VOGdb markers	Bacteria;Firmicutes;Negativicutes;Veillonellales;Veillonellaceae;Veillonella;	Similarity to host genome
H-1_18:3	H-1	UGV-GENOME-0276924	96.774	31	1	0	3	33	31410	31380	3.46e-05	54	Host-associated;Human;Digestive system;NA;Host-associated(human);NA	Sg_102637	41613	Linear contig	High-quality	Duplodnaviria;Heunggongvirae;Uroviricota;Caudoviricetes;Caudovirales;;;	VOGdb markers	Bacteria;Firmicutes;Negativicutes;Veillonellales;Veillonellaceae;Veillonella;	Similarity to host genome
H-1_18:3	H-1	UGV-GENOME-0263691	96.774	31	1	0	3	33	5675	5645	3.46e-05	54	Host-associated;Human;Digestive system;NA;Host-associated(human);NA	Sg_121200	39101	Linear contig	High-quality	Duplodnaviria;Heunggongvirae;Uroviricota;Caudoviricetes;Caudovirales;;;	VOGdb markers	Bacteria;Firmicutes;Negativicutes;Veillonellales;Veillonellaceae;Veillonella;	Similarity to host genome
H-1_18:3	H-1	UGV-GENOME-0259225	96.774	31	1	0	3	33	1445	1415	3.46e-05	54	Host-associated;Human;Digestive system;NA;Host-associated(human);NA	Sg_127401	38310	Linear contig	High-quality	Duplodnaviria;Heunggongvirae;Uroviricota;Caudoviricetes;Caudovirales;;;	Viral RefSeq genes	Bacteria;Firmicutes;Negativicutes;Veillonellales;Veillonellaceae;Veillonella;Veillonella parvula	CRISPR (near)identical
H-1_18:3	H-1	UGV-GENOME-0251400	96.774	31	1	0	3	33	31948	31918	3.46e-05	54	Host-associated;Human;Digestive system;NA;Host-associated(human);NA	Sg_138435	36967	Linear contig	Genome fragment	Duplodnaviria;Heunggongvirae;Uroviricota;Caudoviricetes;Caudovirales;;;	Viral RefSeq genes	Bacteria;Firmicutes;Negativicutes;Veillonellales;Veillonellaceae;Veillonella;	Similarity to host genome
H-1_18:3	H-1	UGV-GENOME-0242798	96.774	31	1	0	3	33	25295	25265	3.46e-05	54	Host-associated;Human;Digestive system;NA;Host-associated(human);NA	Sg_149926	35621	Linear contig	High-quality	Duplodnaviria;Heunggongvirae;Uroviricota;Caudoviricetes;Caudovirales;;;	VOGdb markers	Bacteria;Firmicutes;Negativicutes;Veillonellales;Veillonellaceae;Veillonella;	Similarity to host genome
H-1_18:3	H-1	UGV-GENOME-0208191	96.774	31	1	0	3	33	18091	18061	3.46e-05	54	Host-associated;Human;Digestive system;NA;Host-associated(human);NA	Sg_204678	29418	Linear contig	Genome fragment	Duplodnaviria;Heunggongvirae;Uroviricota;Caudoviricetes;Caudovirales;;;	Viral RefSeq genes	Bacteria;Firmicutes;Negativicutes;Veillonellales;Veillonellaceae;Veillonella;	Similarity to host genome
H-1_18:3	H-1	UGV-GENOME-0188458	96.774	31	1	0	3	33	21192	21162	3.46e-05	54	Host-associated;Human;Digestive system;NA;Host-associated(human);NA	Sg_237238	25996	Linear contig	Genome fragment	Duplodnaviria;Heunggongvirae;Uroviricota;Caudoviricetes;Caudovirales;;;	Viral RefSeq genes	Bacteria;Firmicutes;Negativicutes;Veillonellales;Veillonellaceae;Veillonella;	Similarity to host genome
H-1_18:3	H-1	DTR_472397	96.774	31	1	0	1	31	37373	37403	3.46e-05	54	Host-associated;Human;Gut;NA;NA;NA	vOTU_111313	40346	Direct terminal repeats (DTRs)	Reference	Duplodnaviria;Heunggongvirae;Uroviricota;Caudoviricetes;Caudovirales;;;	Viral RefSeq genes	Bacteria;Firmicutes;Negativicutes;Veillonellales;Veillonellaceae;Veillonella;Veillonella parvula	CRISPR (near)identical
H-1_18:3	H-1	UGV-GENOME-0270638	96.774	31	1	0	1	31	37373	37403	3.46e-05	54	Host-associated;Human;Digestive system;NA;Host-associated(human);NA	vOTU_111313	40401	Direct terminal repeats (DTRs)	High-quality	Duplodnaviria;Heunggongvirae;Uroviricota;Caudoviricetes;Caudovirales;;;	Viral RefSeq genes	Bacteria;Firmicutes;Negativicutes;Veillonellales;Veillonellaceae;Veillonella;Veillonella parvula	CRISPR (near)identical
H-1_18:3	H-1	UGV-GENOME-0268614_1	96.774	31	1	0	3	33	10027	10057	3.46e-05	54	Host-associated;Human;Digestive system;NA;Host-associated(human);NA	vOTU_124181	38717	Direct terminal repeats (DTRs)	High-quality	Duplodnaviria;Heunggongvirae;Uroviricota;Caudoviricetes;Caudovirales;;;	VOGdb markers via vOTU	Bacteria;Firmicutes;Negativicutes;Veillonellales;Veillonellaceae;Veillonella;	Similarity to host genome
H-1_18:3	H-1	UGV-GENOME-0267499_1	96.774	31	1	0	3	33	12533	12563	3.46e-05	54	Host-associated;Human;Digestive system;NA;Host-associated(human);NA	Sg_123890	38755	Linear contig	High-quality	Duplodnaviria;Heunggongvirae;Uroviricota;Caudoviricetes;Caudovirales;;;	Viral RefSeq genes	Bacteria;Firmicutes;Negativicutes;Veillonellales;Veillonellaceae;Veillonella;Veillonella parvula	CRISPR (near)identical
H-1_18:3	H-1	UGV-GENOME-0266663_1	96.774	31	1	0	3	33	9644	9674	3.46e-05	54	Host-associated;Human;Digestive system;NA;Host-associated(human);NA	Sg_128266	38203	Linear contig	High-quality	Duplodnaviria;Heunggongvirae;Uroviricota;Caudoviricetes;Caudovirales;;;	Viral RefSeq genes	Bacteria;Firmicutes;Negativicutes;Veillonellales;Veillonellaceae;Veillonella;	Similarity to host genome
H-1_18:3	H-1	UGV-GENOME-0263919_1	96.774	31	1	0	3	33	11306	11336	3.46e-05	54	Host-associated;Human;Digestive system;NA;Host-associated(human);NA	vOTU_125290	38574	Linear contig	High-quality	Duplodnaviria;Heunggongvirae;Uroviricota;Caudoviricetes;Caudovirales;;;	Viral RefSeq genes	Bacteria;Firmicutes;Negativicutes;Veillonellales;Veillonellaceae;Veillonella;	Similarity to host genome
H-1_18:3	H-1	UGV-GENOME-0262157_1	96.774	31	1	0	3	33	10794	10824	3.46e-05	54	Host-associated;Human;Digestive system;NA;Host-associated(human);NA	vOTU_132690	37666	Linear contig	High-quality	Duplodnaviria;Heunggongvirae;Uroviricota;Caudoviricetes;Caudovirales;;;	VOGdb markers	Bacteria;Firmicutes;Negativicutes;Veillonellales;Veillonellaceae;Veillonella;	Similarity to host genome
H-1_18:3	H-1	UGV-GENOME-0196333	96.774	31	1	0	3	33	1895	1925	3.46e-05	54	Host-associated;Human;Digestive system;NA;Host-associated(human);NA	Sg_224070	27322	Linear contig	Genome fragment	Duplodnaviria;Heunggongvirae;Uroviricota;Caudoviricetes;Caudovirales;;;	Viral RefSeq genes	Bacteria;Firmicutes;Negativicutes;Veillonellales;Veillonellaceae;Veillonella;	Similarity to host genome
H-1_18:3	H-1	UGV-GENOME-0191487	96.774	31	1	0	3	33	10090	10120	3.46e-05	54	Host-associated;Human;Digestive system;NA;Host-associated(human);NA	Sg_232158	26494	Linear contig	Genome fragment	Duplodnaviria;Heunggongvirae;Uroviricota;Caudoviricetes;Caudovirales;;;	VOGdb markers	Bacteria;Firmicutes;Negativicutes;Veillonellales;Veillonellaceae;Veillonella;	Similarity to host genome
H-1_18:3	H-1	UGV-GENOME-0182238	96.774	31	1	0	3	33	9993	10023	3.46e-05	54	Host-associated;Human;Digestive system;NA;Host-associated(human);NA	Sg_247583	25018	Linear contig	Genome fragment	Duplodnaviria;Heunggongvirae;Uroviricota;Caudoviricetes;Caudovirales;;;	Viral RefSeq genes	Bacteria;Firmicutes;Negativicutes;Veillonellales;Veillonellaceae;Veillonella;Veillonella parvula	CRISPR (near)identical
H-1_18:3	H-1	UGV-GENOME-0175971	96.774	31	1	0	3	33	9826	9856	3.46e-05	54	Host-associated;Human;Digestive system;NA;Host-associated(human);NA	vOTU_126219	24062	Linear contig	Genome fragment	Duplodnaviria;Heunggongvirae;Uroviricota;Caudoviricetes;Caudovirales;;;	Viral RefSeq genes	Bacteria;Firmicutes;Negativicutes;Veillonellales;Veillonellaceae;Veillonella;	Similarity to host genome
H-1_18:3	H-1	DTR_864860	96.552	29	1	0	3	31	31213	31185	0.00054	50.1	Host-associated;Human;Gut;NA;NA;NA	Sg_095925	42544	Direct terminal repeats (DTRs)	Reference	Duplodnaviria;Heunggongvirae;Uroviricota;Caudoviricetes;Caudovirales;;;	Viral RefSeq genes	Bacteria;Firmicutes;Negativicutes;Veillonellales;Veillonellaceae;Veillonella;Veillonella parvula	CRISPR (near)identical
H-1_18:3	H-1	UGV-GENOME-0282122	96.552	29	1	0	3	31	31213	31185	0.00054	50.1	Host-associated;Human;Digestive system;NA;Host-associated(human);NA	Sg_095925	42663	Direct terminal repeats (DTRs)	High-quality	Duplodnaviria;Heunggongvirae;Uroviricota;Caudoviricetes;Caudovirales;;;	Viral RefSeq genes	Bacteria;Firmicutes;Negativicutes;Veillonellales;Veillonellaceae;Veillonella;	CRISPR (near)identical
H-1_18:3	H-1	UGV-GENOME-0238099	96.552	29	1	0	3	31	28332	28304	0.00054	50.1	Host-associated;Human;Digestive system;NA;Host-associated(human);NA	Sg_131951	34920	Linear contig	Genome fragment	Duplodnaviria;Heunggongvirae;Uroviricota;Caudoviricetes;Caudovirales;;;	Viral RefSeq genes	Bacteria;Firmicutes;Negativicutes;Veillonellales;Veillonellaceae;Veillonella;	Similarity to host genome
H-1_18:3	H-1	UGV-GENOME-0235893	96.552	29	1	0	3	31	30001	29973	0.00054	50.1	Host-associated;Human;Digestive system;NA;Host-associated(human);NA	vOTU_080733	34501	Linear contig	Genome fragment	Duplodnaviria;Heunggongvirae;Uroviricota;Caudoviricetes;Caudovirales;;;	Viral RefSeq genes	Bacteria;Firmicutes;Negativicutes;Veillonellales;Veillonellaceae;Veillonella;	CRISPR multiple partial
H-1_18:3	H-1	UGV-GENOME-0230142	96.552	29	1	0	3	31	26757	26729	0.00054	50.1	Host-associated;Human;Digestive system;NA;Host-associated(human);NA	Sg_131951	33345	Linear contig	Genome fragment	Duplodnaviria;Heunggongvirae;Uroviricota;Caudoviricetes;Caudovirales;;;	Viral RefSeq genes	Bacteria;Firmicutes;Negativicutes;Veillonellales;Veillonellaceae;Veillonella;	Similarity to host genome
H-1_18:3	H-1	UGV-GENOME-0198605	96.552	29	1	0	3	31	26977	26949	0.00054	50.1	Host-associated;Human;Digestive system;NA;Host-associated(human);NA	Sg_220143	27729	Linear contig	Genome fragment	Duplodnaviria;Heunggongvirae;Uroviricota;Caudoviricetes;Caudovirales;;;	Viral RefSeq genes	Bacteria;Firmicutes;Negativicutes;Veillonellales;Veillonellaceae;Veillonella;	Similarity to host genome
H-1_18:3	H-1	UGV-GENOME-0171902	96.552	29	1	0	3	31	16862	16834	0.00054	50.1	Host-associated;Human;Digestive system;NA;Host-associated(human);NA	vOTU_126219	23465	Linear contig	Genome fragment	Duplodnaviria;Heunggongvirae;Uroviricota;Caudoviricetes;Caudovirales;;;	Viral RefSeq genes	Bacteria;Firmicutes;Negativicutes;Veillonellales;Veillonellaceae;Veillonella;	Similarity to host genome
H-1_18:3	H-1	IMGVR_UViG_3300008134_000030	96.552	29	1	0	3	31	13494	13466	0.00054	50.1	Host-associated;Human;Digestive system;Oral cavity;Host-associated(human);Oral	Sg_273630	22839	Linear contig	Genome fragment	Duplodnaviria;Heunggongvirae;Uroviricota;Caudoviricetes;Caudovirales;;;	Viral RefSeq genes	Bacteria;Firmicutes;Negativicutes;Veillonellales;Veillonellaceae;Veillonella;	Similarity to host genome
H-1_18:3	H-1	IMGVR_UViG_3300025517_000002	96.552	29	1	0	3	31	7236	7208	0.00054	50.1	Engineered;Lab enrichment;Defined media;Unclassified;Engineered;	Sg_081167	45288	Direct terminal repeats (DTRs)	High-quality	Duplodnaviria;Heunggongvirae;Uroviricota;Caudoviricetes;Caudovirales;Siphoviridae;;	Viral RefSeq genes	Bacteria;Firmicutes;Bacilli;Bacillales;Bacillaceae;Bacillus;Bacillus coagulans	CRISPR (near)identical
H-1_18:3	H-1	DTR_825449	96.552	29	1	0	3	31	36133	36161	0.00054	50.1	Host-associated;Human;Gut;NA;NA;NA	Sg_094239	42810	Direct terminal repeats (DTRs)	Reference	Duplodnaviria;Heunggongvirae;Uroviricota;Caudoviricetes;Caudovirales;;;	Viral RefSeq genes	Bacteria;Firmicutes;Negativicutes;Veillonellales;Veillonellaceae;Veillonella;Veillonella parvula	CRISPR (near)identical
H-1_18:3	H-1	UGV-GENOME-4419436	96.552	29	1	0	3	31	10985	11013	0.00054	50.1	Host-associated;Human;Digestive system;NA;Host-associated(human);NA	Sg_095925	42663	Direct terminal repeats (DTRs)	High-quality	Duplodnaviria;Heunggongvirae;Uroviricota;Caudoviricetes;Caudovirales;;;	Viral RefSeq genes	Bacteria;Firmicutes;Negativicutes;Veillonellales;Veillonellaceae;Veillonella;	CRISPR (near)identical
H-1_18:3	H-1	UGV-GENOME-0289576_1	96.552	29	1	0	3	31	2385	2413	0.00054	50.1	Host-associated;Human;Digestive system;NA;Host-associated(human);NA	vOTU_132690	30675	Linear contig	High-quality	Duplodnaviria;Heunggongvirae;Uroviricota;Caudoviricetes;Caudovirales;;;	VOGdb markers	Bacteria;Firmicutes;Negativicutes;Veillonellales;Veillonellaceae;Veillonella;	Similarity to host genome
H-1_18:3	H-1	UGV-GENOME-0283676	96.552	29	1	0	3	31	36133	36161	0.00054	50.1	Host-associated;Human;Digestive system;NA;Host-associated(human);NA	Sg_094239	42929	Direct terminal repeats (DTRs)	High-quality	Duplodnaviria;Heunggongvirae;Uroviricota;Caudoviricetes;Caudovirales;;;	Viral RefSeq genes	Bacteria;Firmicutes;Negativicutes;Veillonellales;Veillonellaceae;Veillonella;Veillonella parvula	CRISPR (near)identical
H-1_18:3	H-1	UGV-GENOME-0265575	96.552	29	1	0	3	31	12397	12425	0.00054	50.1	Host-associated;Human;Digestive system;NA;Host-associated(human);NA	vOTU_118648	39436	Linear contig	High-quality	Duplodnaviria;Heunggongvirae;Uroviricota;Caudoviricetes;Caudovirales;;;	Viral RefSeq genes	Bacteria;Firmicutes;Negativicutes;Veillonellales;Veillonellaceae;Veillonella;	Similarity to host genome
H-1_18:3	H-1	UGV-GENOME-0255994	96.552	29	1	0	3	31	8968	8996	0.00054	50.1	Host-associated;Human;Digestive system;NA;Host-associated(human);NA	Sg_131951	37757	Linear contig	High-quality	Duplodnaviria;Heunggongvirae;Uroviricota;Caudoviricetes;Caudovirales;;;	Viral RefSeq genes	Bacteria;Firmicutes;Negativicutes;Veillonellales;Veillonellaceae;Veillonella;	Similarity to host genome
H-1_18:3	H-1	Monaco_MBA4039_NODE_52_length_21269_cov_7.110257	96.552	29	1	0	3	31	17904	17932	0.00054	50.1	Host-associated;Human;Digestive system;NA;Host-associated(human);NA	Sg_294991	21269	Linear contig	Genome fragment	Duplodnaviria;Heunggongvirae;Uroviricota;Caudoviricetes;Caudovirales;;;	Viral RefSeq genes	Bacteria;Firmicutes;Negativicutes;Veillonellales;Veillonellaceae;Veillonella;	CRISPR (near)identical
H-1_18:3	H-1	IMGVR_UViG_3300009363_000019	96.552	29	1	0	3	31	12753	12781	0.00054	50.1	Host-associated;Human;Digestive system;Oral cavity;Host-associated(human);Oral	Sg_096211	42620	Linear contig	High-quality	Duplodnaviria;Heunggongvirae;Uroviricota;Caudoviricetes;Caudovirales;;;	Viral RefSeq genes	Bacteria;Firmicutes;Negativicutes;Veillonellales;Veillonellaceae;Veillonella;Veillonella parvula	CRISPR (near)identical
H-1_18:3	H-1	IMGVR_UViG_3300025540_000001	96.552	29	1	0	3	31	5391	5419	0.00054	50.1	Engineered;Lab enrichment;Defined media;Unclassified;Engineered;	vOTU_067317	48934	Direct terminal repeats (DTRs)	High-quality	Duplodnaviria;Heunggongvirae;Uroviricota;Caudoviricetes;Caudovirales;;;	Viral RefSeq genes	Bacteria;Firmicutes;Bacilli;Bacillales;Bacillaceae;Bacillus;Bacillus coagulans	CRISPR (near)identical
MA-13_21:1	MA-13	IMGVR_UViG_3300002951_000001	100	34	0	0	1	34	5653	5620	2.48e-09	67.9	Engineered;Lab enrichment;Defined media;Unclassified;Engineered;	Sg_111311	35384	Linear contig	Genome fragment	Duplodnaviria;Heunggongvirae;Uroviricota;Caudoviricetes;Caudovirales;Siphoviridae;;	Viral RefSeq genes	Bacteria;Firmicutes;Bacilli;Bacillales;Bacillaceae;Bacillus;Bacillus coagulans	CRISPR (near)identical
MA-13_21:1	MA-13	IMGVR_UViG_3300025523_000001	100	34	0	0	1	34	5332	5299	2.48e-09	67.9	Engineered;Lab enrichment;Defined media;Unclassified;Engineered;	Sg_111311	40402	Direct terminal repeats (DTRs)	High-quality	Duplodnaviria;Heunggongvirae;Uroviricota;Caudoviricetes;Caudovirales;Siphoviridae;;	Viral RefSeq genes	Bacteria;Firmicutes;Bacilli;Bacillales;Bacillaceae;Bacillus;Bacillus coagulans	CRISPR (near)identical
MA-13_21:1	MA-13	IMGVR_UViG_3300033172_000012	100	30	0	0	5	34	11984	12013	6.04e-07	60	Engineered;Bioreactor;Anaerobic;Unclassified;Engineered;	Sg_201450	29773	Linear contig	Genome fragment	Duplodnaviria;Heunggongvirae;Uroviricota;Caudoviricetes;Caudovirales;;;	Viral RefSeq genes	0	0
MA-13_21:19	MA-13	IMGVR_UViG_3300025571_000004	94.286	35	2	0	1	35	810	776	3.99e-05	54	Engineered;Lab enrichment;Defined media;Unclassified;Engineered;	vOTU_048916	56257	Linear contig	High-quality	Duplodnaviria;Heunggongvirae;Uroviricota;Caudoviricetes;Caudovirales;Siphoviridae;;	Viral RefSeq genes	Bacteria;Firmicutes;Bacilli;Bacillales;Bacillaceae;Aeribacillus;	CRISPR (near)identical
MA-13_31:2	MA-13	IMGVR_UViG_3300002918_000041	96.97	33	1	0	1	33	2827	2795	2.22e-06	58	Engineered;Lab enrichment;Defined media;Unclassified;Engineered;	Sg_632784	9253	Linear contig	Genome fragment	0	0	Bacteria;Firmicutes;Bacilli;Bacillales;Bacillaceae;Bacillus;	Similarity to host genome
MA-13_31:5	MA-13	IMGVR_UViG_3300025540_000001	100	33	0	0	1	33	25587	25555	9.09e-09	65.9	Engineered;Lab enrichment;Defined media;Unclassified;Engineered;	vOTU_067317	48934	Direct terminal repeats (DTRs)	High-quality	Duplodnaviria;Heunggongvirae;Uroviricota;Caudoviricetes;Caudovirales;;;	Viral RefSeq genes	Bacteria;Firmicutes;Bacilli;Bacillales;Bacillaceae;Bacillus;Bacillus coagulans	CRISPR (near)identical
MA-13_31:5	MA-13	IMGVR_UViG_3300025517_000002	100	33	0	0	1	33	38024	38056	9.09e-09	65.9	Engineered;Lab enrichment;Defined media;Unclassified;Engineered;	Sg_081167	45288	Direct terminal repeats (DTRs)	High-quality	Duplodnaviria;Heunggongvirae;Uroviricota;Caudoviricetes;Caudovirales;Siphoviridae;;	Viral RefSeq genes	Bacteria;Firmicutes;Bacilli;Bacillales;Bacillaceae;Bacillus;Bacillus coagulans	CRISPR (near)identical
MA-13_31:6	MA-13	IMGVR_UViG_3300002951_000001	100	25	0	0	5	29	28396	28420	0.000582	50.1	Engineered;Lab enrichment;Defined media;Unclassified;Engineered;	Sg_111311	35384	Linear contig	Genome fragment	Duplodnaviria;Heunggongvirae;Uroviricota;Caudoviricetes;Caudovirales;Siphoviridae;;	Viral RefSeq genes	Bacteria;Firmicutes;Bacilli;Bacillales;Bacillaceae;Bacillus;Bacillus coagulans	CRISPR (near)identical
MA-13_31:6	MA-13	IMGVR_UViG_3300025523_000001	100	25	0	0	5	29	28075	28099	0.000582	50.1	Engineered;Lab enrichment;Defined media;Unclassified;Engineered;	Sg_111311	40402	Direct terminal repeats (DTRs)	High-quality	Duplodnaviria;Heunggongvirae;Uroviricota;Caudoviricetes;Caudovirales;Siphoviridae;;	Viral RefSeq genes	Bacteria;Firmicutes;Bacilli;Bacillales;Bacillaceae;Bacillus;Bacillus coagulans	CRISPR (near)identical
MA-13_31:11	MA-13	IMGVR_UViG_3300025517_000002	100	34	0	0	1	34	26826	26793	2.66e-09	67.9	Engineered;Lab enrichment;Defined media;Unclassified;Engineered;	Sg_081167	45288	Direct terminal repeats (DTRs)	High-quality	Duplodnaviria;Heunggongvirae;Uroviricota;Caudoviricetes;Caudovirales;Siphoviridae;;	Viral RefSeq genes	Bacteria;Firmicutes;Bacilli;Bacillales;Bacillaceae;Bacillus;Bacillus coagulans	CRISPR (near)identical
MA-13_19:3	MA-13	IMGVR_UViG_3300002918_000041	96.97	33	1	0	1	33	2827	2795	2.22e-06	58	Engineered;Lab enrichment;Defined media;Unclassified;Engineered;	Sg_632784	9253	Linear contig	Genome fragment	0	0	Bacteria;Firmicutes;Bacilli;Bacillales;Bacillaceae;Bacillus;	Similarity to host genome
MA-13_19:6	MA-13	IMGVR_UViG_3300025540_000001	100	33	0	0	1	33	25587	25555	9.09e-09	65.9	Engineered;Lab enrichment;Defined media;Unclassified;Engineered;	vOTU_067317	48934	Direct terminal repeats (DTRs)	High-quality	Duplodnaviria;Heunggongvirae;Uroviricota;Caudoviricetes;Caudovirales;;;	Viral RefSeq genes	Bacteria;Firmicutes;Bacilli;Bacillales;Bacillaceae;Bacillus;Bacillus coagulans	CRISPR (near)identical
MA-13_19:6	MA-13	IMGVR_UViG_3300025517_000002	100	33	0	0	1	33	38024	38056	9.09e-09	65.9	Engineered;Lab enrichment;Defined media;Unclassified;Engineered;	Sg_081167	45288	Direct terminal repeats (DTRs)	High-quality	Duplodnaviria;Heunggongvirae;Uroviricota;Caudoviricetes;Caudovirales;Siphoviridae;;	Viral RefSeq genes	Bacteria;Firmicutes;Bacilli;Bacillales;Bacillaceae;Bacillus;Bacillus coagulans	CRISPR (near)identical
MA-13_19:7	MA-13	IMGVR_UViG_3300002951_000001	100	25	0	0	5	29	28396	28420	0.000582	50.1	Engineered;Lab enrichment;Defined media;Unclassified;Engineered;	Sg_111311	35384	Linear contig	Genome fragment	Duplodnaviria;Heunggongvirae;Uroviricota;Caudoviricetes;Caudovirales;Siphoviridae;;	Viral RefSeq genes	Bacteria;Firmicutes;Bacilli;Bacillales;Bacillaceae;Bacillus;Bacillus coagulans	CRISPR (near)identical
MA-13_19:7	MA-13	IMGVR_UViG_3300025523_000001	100	25	0	0	5	29	28075	28099	0.000582	50.1	Engineered;Lab enrichment;Defined media;Unclassified;Engineered;	Sg_111311	40402	Direct terminal repeats (DTRs)	High-quality	Duplodnaviria;Heunggongvirae;Uroviricota;Caudoviricetes;Caudovirales;Siphoviridae;;	Viral RefSeq genes	Bacteria;Firmicutes;Bacilli;Bacillales;Bacillaceae;Bacillus;Bacillus coagulans	CRISPR (near)identical
MA-13_19:12	MA-13	IMGVR_UViG_3300025517_000002	100	34	0	0	1	34	26826	26793	2.48e-09	67.9	Engineered;Lab enrichment;Defined media;Unclassified;Engineered;	Sg_081167	45288	Direct terminal repeats (DTRs)	High-quality	Duplodnaviria;Heunggongvirae;Uroviricota;Caudoviricetes;Caudovirales;Siphoviridae;;	Viral RefSeq genes	Bacteria;Firmicutes;Bacilli;Bacillales;Bacillaceae;Bacillus;Bacillus coagulans	CRISPR (near)identical
P38_37:5	P38	IMGVR_UViG_3300002951_000001	96.552	29	1	0	8	36	16032	16004	0.000665	50.1	Engineered;Lab enrichment;Defined media;Unclassified;Engineered;	Sg_111311	35384	Linear contig	Genome fragment	Duplodnaviria;Heunggongvirae;Uroviricota;Caudoviricetes;Caudovirales;Siphoviridae;;	Viral RefSeq genes	Bacteria;Firmicutes;Bacilli;Bacillales;Bacillaceae;Bacillus;Bacillus coagulans	CRISPR (near)identical
P38_37:5	P38	IMGVR_UViG_3300025523_000001	96.552	29	1	0	8	36	15711	15683	0.000665	50.1	Engineered;Lab enrichment;Defined media;Unclassified;Engineered;	Sg_111311	40402	Direct terminal repeats (DTRs)	High-quality	Duplodnaviria;Heunggongvirae;Uroviricota;Caudoviricetes;Caudovirales;Siphoviridae;;	Viral RefSeq genes	Bacteria;Firmicutes;Bacilli;Bacillales;Bacillaceae;Bacillus;Bacillus coagulans	CRISPR (near)identical
P38_37:6	P38	IMGVR_UViG_3300025540_000001	91.892	37	3	0	1	37	12899	12935	0.000707	50.1	Engineered;Lab enrichment;Defined media;Unclassified;Engineered;	vOTU_067317	48934	Direct terminal repeats (DTRs)	High-quality	Duplodnaviria;Heunggongvirae;Uroviricota;Caudoviricetes;Caudovirales;;;	Viral RefSeq genes	Bacteria;Firmicutes;Bacilli;Bacillales;Bacillaceae;Bacillus;Bacillus coagulans	CRISPR (near)identical
P38_37:6	P38	IMGVR_UViG_3300025517_000002	91.892	37	3	0	1	37	44768	44732	0.000707	50.1	Engineered;Lab enrichment;Defined media;Unclassified;Engineered;	Sg_081167	45288	Direct terminal repeats (DTRs)	High-quality	Duplodnaviria;Heunggongvirae;Uroviricota;Caudoviricetes;Caudovirales;Siphoviridae;;	Viral RefSeq genes	Bacteria;Firmicutes;Bacilli;Bacillales;Bacillaceae;Bacillus;Bacillus coagulans	CRISPR (near)identical
P38_37:8	P38	IMGVR_UViG_3300002951_000001	100	32	0	0	7	38	15849	15880	4.98e-08	63.9	Engineered;Lab enrichment;Defined media;Unclassified;Engineered;	Sg_111311	35384	Linear contig	Genome fragment	Duplodnaviria;Heunggongvirae;Uroviricota;Caudoviricetes;Caudovirales;Siphoviridae;;	Viral RefSeq genes	Bacteria;Firmicutes;Bacilli;Bacillales;Bacillaceae;Bacillus;Bacillus coagulans	CRISPR (near)identical
P38_37:8	P38	IMGVR_UViG_3300025523_000001	100	32	0	0	7	38	15528	15559	4.98e-08	63.9	Engineered;Lab enrichment;Defined media;Unclassified;Engineered;	Sg_111311	40402	Direct terminal repeats (DTRs)	High-quality	Duplodnaviria;Heunggongvirae;Uroviricota;Caudoviricetes;Caudovirales;Siphoviridae;;	Viral RefSeq genes	Bacteria;Firmicutes;Bacilli;Bacillales;Bacillaceae;Bacillus;Bacillus coagulans	CRISPR (near)identical
P38_37:10	P38	IMGVR_UViG_3300002948_000017	97.368	38	1	0	1	38	8494	8531	3.19e-09	67.9	Engineered;Lab enrichment;Defined media;Unclassified;Engineered;	Sg_475097	13030	Linear contig	Genome fragment	Duplodnaviria;Heunggongvirae;Uroviricota;Caudoviricetes;Caudovirales;Siphoviridae;;	Viral RefSeq genes	Bacteria;Firmicutes;Bacilli;Bacillales;Bacillaceae;Bacillus;Bacillus coagulans	CRISPR (near)identical
P38_37:17	P38	IMGVR_UViG_3300002951_000001	100	26	0	0	1	26	18636	18661	0.000147	52	Engineered;Lab enrichment;Defined media;Unclassified;Engineered;	Sg_111311	35384	Linear contig	Genome fragment	Duplodnaviria;Heunggongvirae;Uroviricota;Caudoviricetes;Caudovirales;Siphoviridae;;	Viral RefSeq genes	Bacteria;Firmicutes;Bacilli;Bacillales;Bacillaceae;Bacillus;Bacillus coagulans	CRISPR (near)identical
P38_37:17	P38	IMGVR_UViG_3300002948_000017	100	26	0	0	1	26	11618	11593	0.000147	52	Engineered;Lab enrichment;Defined media;Unclassified;Engineered;	Sg_475097	13030	Linear contig	Genome fragment	Duplodnaviria;Heunggongvirae;Uroviricota;Caudoviricetes;Caudovirales;Siphoviridae;;	Viral RefSeq genes	Bacteria;Firmicutes;Bacilli;Bacillales;Bacillaceae;Bacillus;Bacillus coagulans	CRISPR (near)identical
P38_37:17	P38	IMGVR_UViG_3300025523_000001	100	26	0	0	1	26	18315	18340	0.000147	52	Engineered;Lab enrichment;Defined media;Unclassified;Engineered;	Sg_111311	40402	Direct terminal repeats (DTRs)	High-quality	Duplodnaviria;Heunggongvirae;Uroviricota;Caudoviricetes;Caudovirales;Siphoviridae;;	Viral RefSeq genes	Bacteria;Firmicutes;Bacilli;Bacillales;Bacillaceae;Bacillus;Bacillus coagulans	CRISPR (near)identical
P38_37:17	P38	Bacilli_gi_384162404-855932-891120|1-32014	93.939	33	2	0	1	33	12799	12831	0.000582	50.1	NA;NA;NA;NA;NA;NA	vOTU_165423	32014	Integrated provirus	Genome fragment	Duplodnaviria;Heunggongvirae;Uroviricota;Caudoviricetes;Caudovirales;Siphoviridae;;	VOGdb markers via vOTU	Bacteria;Firmicutes;Bacilli;Bacillales;Bacillaceae;Bacillus;	Provirus
P38_37:17	P38	IMGVR_UViG_649633008_000001	93.939	33	2	0	1	33	14624	14656	0.000582	50.1	NA;NA;NA;NA;NA;NA	vOTU_165423	33838	Integrated provirus	Genome fragment	Duplodnaviria;Heunggongvirae;Uroviricota;Caudoviricetes;Caudovirales;Siphoviridae;;	Viral RefSeq genes	Bacteria;Firmicutes;Bacilli;Bacillales;Bacillaceae;unclassified Bacillaceae;	Provirus
P38_37:18	P38	IMGVR_UViG_3300002948_000017	94.286	35	2	0	1	35	8485	8451	3.99e-05	54	Engineered;Lab enrichment;Defined media;Unclassified;Engineered;	Sg_475097	13030	Linear contig	Genome fragment	Duplodnaviria;Heunggongvirae;Uroviricota;Caudoviricetes;Caudovirales;Siphoviridae;;	Viral RefSeq genes	Bacteria;Firmicutes;Bacilli;Bacillales;Bacillaceae;Bacillus;Bacillus coagulans	CRISPR (near)identical
P38_37:20	P38	IMGVR_UViG_3300002948_000017	94.444	36	2	0	1	36	7536	7501	1.08e-05	56	Engineered;Lab enrichment;Defined media;Unclassified;Engineered;	Sg_475097	13030	Linear contig	Genome fragment	Duplodnaviria;Heunggongvirae;Uroviricota;Caudoviricetes;Caudovirales;Siphoviridae;;	Viral RefSeq genes	Bacteria;Firmicutes;Bacilli;Bacillales;Bacillaceae;Bacillus;Bacillus coagulans	CRISPR (near)identical
P38_37:20	P38	IMGVR_UViG_3300002951_000001	94.118	34	2	0	1	34	22718	22751	0.000168	52	Engineered;Lab enrichment;Defined media;Unclassified;Engineered;	Sg_111311	35384	Linear contig	Genome fragment	Duplodnaviria;Heunggongvirae;Uroviricota;Caudoviricetes;Caudovirales;Siphoviridae;;	Viral RefSeq genes	Bacteria;Firmicutes;Bacilli;Bacillales;Bacillaceae;Bacillus;Bacillus coagulans	CRISPR (near)identical
P38_37:20	P38	IMGVR_UViG_3300025523_000001	94.118	34	2	0	1	34	22397	22430	0.000168	52	Engineered;Lab enrichment;Defined media;Unclassified;Engineered;	Sg_111311	40402	Direct terminal repeats (DTRs)	High-quality	Duplodnaviria;Heunggongvirae;Uroviricota;Caudoviricetes;Caudovirales;Siphoviridae;;	Viral RefSeq genes	Bacteria;Firmicutes;Bacilli;Bacillales;Bacillaceae;Bacillus;Bacillus coagulans	CRISPR (near)identical
P38_37:22	P38	IMGVR_UViG_3300025534_000066	100	34	0	0	1	34	9690	9657	2.48e-09	67.9	Engineered;Lab enrichment;Defined media;Unclassified;Engineered;	Sg_568232	10592	Linear contig	Genome fragment	Duplodnaviria;Heunggongvirae;Uroviricota;Caudoviricetes;Caudovirales;;;	Viral RefSeq genes	Bacteria;Firmicutes;Bacilli;Bacillales;Bacillaceae;Bacillus;Bacillus coagulans	CRISPR (near)identical
P38_23:5	P38	IMGVR_UViG_3300002951_000001	96.552	29	1	0	8	36	16032	16004	0.000665	50.1	Engineered;Lab enrichment;Defined media;Unclassified;Engineered;	Sg_111311	35384	Linear contig	Genome fragment	Duplodnaviria;Heunggongvirae;Uroviricota;Caudoviricetes;Caudovirales;Siphoviridae;;	Viral RefSeq genes	Bacteria;Firmicutes;Bacilli;Bacillales;Bacillaceae;Bacillus;Bacillus coagulans	CRISPR (near)identical
P38_23:5	P38	IMGVR_UViG_3300025523_000001	96.552	29	1	0	8	36	15711	15683	0.000665	50.1	Engineered;Lab enrichment;Defined media;Unclassified;Engineered;	Sg_111311	40402	Direct terminal repeats (DTRs)	High-quality	Duplodnaviria;Heunggongvirae;Uroviricota;Caudoviricetes;Caudovirales;Siphoviridae;;	Viral RefSeq genes	Bacteria;Firmicutes;Bacilli;Bacillales;Bacillaceae;Bacillus;Bacillus coagulans	CRISPR (near)identical
P38_23:6	P38	IMGVR_UViG_3300025540_000001	91.892	37	3	0	1	37	12899	12935	0.000707	50.1	Engineered;Lab enrichment;Defined media;Unclassified;Engineered;	vOTU_067317	48934	Direct terminal repeats (DTRs)	High-quality	Duplodnaviria;Heunggongvirae;Uroviricota;Caudoviricetes;Caudovirales;;;	Viral RefSeq genes	Bacteria;Firmicutes;Bacilli;Bacillales;Bacillaceae;Bacillus;Bacillus coagulans	CRISPR (near)identical
P38_23:6	P38	IMGVR_UViG_3300025517_000002	91.892	37	3	0	1	37	44768	44732	0.000707	50.1	Engineered;Lab enrichment;Defined media;Unclassified;Engineered;	Sg_081167	45288	Direct terminal repeats (DTRs)	High-quality	Duplodnaviria;Heunggongvirae;Uroviricota;Caudoviricetes;Caudovirales;Siphoviridae;;	Viral RefSeq genes	Bacteria;Firmicutes;Bacilli;Bacillales;Bacillaceae;Bacillus;Bacillus coagulans	CRISPR (near)identical
P38_23:8	P38	IMGVR_UViG_3300002951_000001	100	32	0	0	7	38	15849	15880	4.98e-08	63.9	Engineered;Lab enrichment;Defined media;Unclassified;Engineered;	Sg_111311	35384	Linear contig	Genome fragment	Duplodnaviria;Heunggongvirae;Uroviricota;Caudoviricetes;Caudovirales;Siphoviridae;;	Viral RefSeq genes	Bacteria;Firmicutes;Bacilli;Bacillales;Bacillaceae;Bacillus;Bacillus coagulans	CRISPR (near)identical
P38_23:8	P38	IMGVR_UViG_3300025523_000001	100	32	0	0	7	38	15528	15559	4.98e-08	63.9	Engineered;Lab enrichment;Defined media;Unclassified;Engineered;	Sg_111311	40402	Direct terminal repeats (DTRs)	High-quality	Duplodnaviria;Heunggongvirae;Uroviricota;Caudoviricetes;Caudovirales;Siphoviridae;;	Viral RefSeq genes	Bacteria;Firmicutes;Bacilli;Bacillales;Bacillaceae;Bacillus;Bacillus coagulans	CRISPR (near)identical
P38_23:10	P38	IMGVR_UViG_3300002948_000017	97.368	38	1	0	1	38	8494	8531	3.19e-09	67.9	Engineered;Lab enrichment;Defined media;Unclassified;Engineered;	Sg_475097	13030	Linear contig	Genome fragment	Duplodnaviria;Heunggongvirae;Uroviricota;Caudoviricetes;Caudovirales;Siphoviridae;;	Viral RefSeq genes	Bacteria;Firmicutes;Bacilli;Bacillales;Bacillaceae;Bacillus;Bacillus coagulans	CRISPR (near)identical
P38_23:17	P38	IMGVR_UViG_3300002951_000001	100	26	0	0	1	26	18636	18661	0.000147	52	Engineered;Lab enrichment;Defined media;Unclassified;Engineered;	Sg_111311	35384	Linear contig	Genome fragment	Duplodnaviria;Heunggongvirae;Uroviricota;Caudoviricetes;Caudovirales;Siphoviridae;;	Viral RefSeq genes	Bacteria;Firmicutes;Bacilli;Bacillales;Bacillaceae;Bacillus;Bacillus coagulans	CRISPR (near)identical
P38_23:17	P38	IMGVR_UViG_3300002948_000017	100	26	0	0	1	26	11618	11593	0.000147	52	Engineered;Lab enrichment;Defined media;Unclassified;Engineered;	Sg_475097	13030	Linear contig	Genome fragment	Duplodnaviria;Heunggongvirae;Uroviricota;Caudoviricetes;Caudovirales;Siphoviridae;;	Viral RefSeq genes	Bacteria;Firmicutes;Bacilli;Bacillales;Bacillaceae;Bacillus;Bacillus coagulans	CRISPR (near)identical
P38_23:17	P38	IMGVR_UViG_3300025523_000001	100	26	0	0	1	26	18315	18340	0.000147	52	Engineered;Lab enrichment;Defined media;Unclassified;Engineered;	Sg_111311	40402	Direct terminal repeats (DTRs)	High-quality	Duplodnaviria;Heunggongvirae;Uroviricota;Caudoviricetes;Caudovirales;Siphoviridae;;	Viral RefSeq genes	Bacteria;Firmicutes;Bacilli;Bacillales;Bacillaceae;Bacillus;Bacillus coagulans	CRISPR (near)identical
P38_23:17	P38	Bacilli_gi_384162404-855932-891120|1-32014	93.939	33	2	0	1	33	12799	12831	0.000582	50.1	NA;NA;NA;NA;NA;NA	vOTU_165423	32014	Integrated provirus	Genome fragment	Duplodnaviria;Heunggongvirae;Uroviricota;Caudoviricetes;Caudovirales;Siphoviridae;;	VOGdb markers via vOTU	Bacteria;Firmicutes;Bacilli;Bacillales;Bacillaceae;Bacillus;	Provirus
P38_23:17	P38	IMGVR_UViG_649633008_000001	93.939	33	2	0	1	33	14624	14656	0.000582	50.1	NA;NA;NA;NA;NA;NA	vOTU_165423	33838	Integrated provirus	Genome fragment	Duplodnaviria;Heunggongvirae;Uroviricota;Caudoviricetes;Caudovirales;Siphoviridae;;	Viral RefSeq genes	Bacteria;Firmicutes;Bacilli;Bacillales;Bacillaceae;unclassified Bacillaceae;	Provirus
P38_23:18	P38	IMGVR_UViG_3300002948_000017	94.286	35	2	0	1	35	8485	8451	3.99e-05	54	Engineered;Lab enrichment;Defined media;Unclassified;Engineered;	Sg_475097	13030	Linear contig	Genome fragment	Duplodnaviria;Heunggongvirae;Uroviricota;Caudoviricetes;Caudovirales;Siphoviridae;;	Viral RefSeq genes	Bacteria;Firmicutes;Bacilli;Bacillales;Bacillaceae;Bacillus;Bacillus coagulans	CRISPR (near)identical
P38_23:20	P38	IMGVR_UViG_3300002948_000017	94.444	36	2	0	1	36	7536	7501	1.08e-05	56	Engineered;Lab enrichment;Defined media;Unclassified;Engineered;	Sg_475097	13030	Linear contig	Genome fragment	Duplodnaviria;Heunggongvirae;Uroviricota;Caudoviricetes;Caudovirales;Siphoviridae;;	Viral RefSeq genes	Bacteria;Firmicutes;Bacilli;Bacillales;Bacillaceae;Bacillus;Bacillus coagulans	CRISPR (near)identical
P38_23:20	P38	IMGVR_UViG_3300002951_000001	94.118	34	2	0	1	34	22718	22751	0.000168	52	Engineered;Lab enrichment;Defined media;Unclassified;Engineered;	Sg_111311	35384	Linear contig	Genome fragment	Duplodnaviria;Heunggongvirae;Uroviricota;Caudoviricetes;Caudovirales;Siphoviridae;;	Viral RefSeq genes	Bacteria;Firmicutes;Bacilli;Bacillales;Bacillaceae;Bacillus;Bacillus coagulans	CRISPR (near)identical
P38_23:20	P38	IMGVR_UViG_3300025523_000001	94.118	34	2	0	1	34	22397	22430	0.000168	52	Engineered;Lab enrichment;Defined media;Unclassified;Engineered;	Sg_111311	40402	Direct terminal repeats (DTRs)	High-quality	Duplodnaviria;Heunggongvirae;Uroviricota;Caudoviricetes;Caudovirales;Siphoviridae;;	Viral RefSeq genes	Bacteria;Firmicutes;Bacilli;Bacillales;Bacillaceae;Bacillus;Bacillus coagulans	CRISPR (near)identical
P38_23:22	P38	IMGVR_UViG_3300025534_000066	100	34	0	0	1	34	9690	9657	2.48e-09	67.9	Engineered;Lab enrichment;Defined media;Unclassified;Engineered;	Sg_568232	10592	Linear contig	Genome fragment	Duplodnaviria;Heunggongvirae;Uroviricota;Caudoviricetes;Caudovirales;;;	Viral RefSeq genes	Bacteria;Firmicutes;Bacilli;Bacillales;Bacillaceae;Bacillus;Bacillus coagulans	CRISPR (near)identical
XZL9_24:9	XZL9	IMGVR_UViG_3300025519_000003	100	39	0	0	1	39	7464	7426	3.49e-12	77.8	Engineered;Lab enrichment;Defined media;Unclassified;Engineered;	Sg_034541	63811	Linear contig	Unsure (completeness > 120%)	Duplodnaviria;Heunggongvirae;Uroviricota;Caudoviricetes;Caudovirales;Siphoviridae;;	Viral RefSeq genes	Bacteria;Firmicutes;Bacilli;Bacillales;Bacillaceae;Bacillus;	CRISPR (near)identical
XZL9_24:12	XZL9	IMGVR_UViG_3300025540_000001	91.892	37	3	0	1	37	44918	44882	0.000707	50.1	Engineered;Lab enrichment;Defined media;Unclassified;Engineered;	vOTU_067317	48934	Direct terminal repeats (DTRs)	High-quality	Duplodnaviria;Heunggongvirae;Uroviricota;Caudoviricetes;Caudovirales;;;	Viral RefSeq genes	Bacteria;Firmicutes;Bacilli;Bacillales;Bacillaceae;Bacillus;Bacillus coagulans	CRISPR (near)identical
XZL9_25:12	XZL9	DTR_840753	100	27	0	0	13	39	40518	40492	5.06e-05	54	Host-associated;Human;Gut;NA;NA;NA	Sg_100636	41832	Direct terminal repeats (DTRs)	Reference	Duplodnaviria;Heunggongvirae;Uroviricota;Caudoviricetes;Caudovirales;;;	VOGdb markers	0	0
XZL9_25:12	XZL9	UGV-GENOME-0278465	100	27	0	0	13	39	40518	40492	5.06e-05	54	Host-associated;Human;Digestive system;NA;Host-associated(human);NA	Sg_100636	41931	Direct terminal repeats (DTRs)	High-quality	Duplodnaviria;Heunggongvirae;Uroviricota;Caudoviricetes;Caudovirales;;;	VOGdb markers	0	0
XZL9_25:12	XZL9	IMGVR_UViG_3300025528_000002	96.774	31	1	0	9	39	16939	16909	5.06e-05	54	Engineered;Lab enrichment;Defined media;Unclassified;Engineered;	Sg_083585	44687	Direct terminal repeats (DTRs)	High-quality	Duplodnaviria;Heunggongvirae;Uroviricota;Caudoviricetes;Caudovirales;Siphoviridae;;	Viral RefSeq genes	Bacteria;Firmicutes;Bacilli;Bacillales;Bacillaceae;;	CRISPR (near)identical
XZL9_25:13	XZL9	IMGVR_UViG_3300025540_000001	96.875	32	1	0	1	32	8777	8746	1.15e-05	56	Engineered;Lab enrichment;Defined media;Unclassified;Engineered;	vOTU_067317	48934	Direct terminal repeats (DTRs)	High-quality	Duplodnaviria;Heunggongvirae;Uroviricota;Caudoviricetes;Caudovirales;;;	Viral RefSeq genes	Bacteria;Firmicutes;Bacilli;Bacillales;Bacillaceae;Bacillus;Bacillus coagulans	CRISPR (near)identical
XZL9_25:13	XZL9	IMGVR_UViG_3300025517_000002	96.875	32	1	0	1	32	3850	3881	1.15e-05	56	Engineered;Lab enrichment;Defined media;Unclassified;Engineered;	Sg_081167	45288	Direct terminal repeats (DTRs)	High-quality	Duplodnaviria;Heunggongvirae;Uroviricota;Caudoviricetes;Caudovirales;Siphoviridae;;	Viral RefSeq genes	Bacteria;Firmicutes;Bacilli;Bacillales;Bacillaceae;Bacillus;Bacillus coagulans	CRISPR (near)identical
XZL9_33:1	XZL9	IMGVR_UViG_3300025517_000002	96.667	30	1	0	8	37	17441	17470	0.000179	52	Engineered;Lab enrichment;Defined media;Unclassified;Engineered;	Sg_081167	45288	Direct terminal repeats (DTRs)	High-quality	Duplodnaviria;Heunggongvirae;Uroviricota;Caudoviricetes;Caudovirales;Siphoviridae;;	Viral RefSeq genes	Bacteria;Firmicutes;Bacilli;Bacillales;Bacillaceae;Bacillus;Bacillus coagulans	CRISPR (near)identical
XZL9_33:5	XZL9	GCA_002990925.1	93.939	33	2	0	3	35	88245	88213	0.000624	50.1	NA;NA;NA;NA;NA;NA	Sg_005839	144615	Reference	Reference	Duplodnaviria;Heunggongvirae;Uroviricota;Caudoviricetes;Caudovirales;Herelleviridae;;	Viral RefSeq genes	0	0
XZL9_33:12	XZL9	IMGVR_UViG_3300002948_000017	97.143	35	1	0	2	36	2792	2758	1.75e-07	61.9	Engineered;Lab enrichment;Defined media;Unclassified;Engineered;	Sg_475097	13030	Linear contig	Genome fragment	Duplodnaviria;Heunggongvirae;Uroviricota;Caudoviricetes;Caudovirales;Siphoviridae;;	Viral RefSeq genes	Bacteria;Firmicutes;Bacilli;Bacillales;Bacillaceae;Bacillus;Bacillus coagulans	CRISPR (near)identical
XZL9_33:15	XZL9	IMGVR_UViG_3300002951_000001	100	36	0	0	1	36	8553	8588	1.81e-10	71.9	Engineered;Lab enrichment;Defined media;Unclassified;Engineered;	Sg_111311	35384	Linear contig	Genome fragment	Duplodnaviria;Heunggongvirae;Uroviricota;Caudoviricetes;Caudovirales;Siphoviridae;;	Viral RefSeq genes	Bacteria;Firmicutes;Bacilli;Bacillales;Bacillaceae;Bacillus;Bacillus coagulans	CRISPR (near)identical
XZL9_33:15	XZL9	IMGVR_UViG_3300025523_000001	100	36	0	0	1	36	8232	8267	1.81e-10	71.9	Engineered;Lab enrichment;Defined media;Unclassified;Engineered;	Sg_111311	40402	Direct terminal repeats (DTRs)	High-quality	Duplodnaviria;Heunggongvirae;Uroviricota;Caudoviricetes;Caudovirales;Siphoviridae;;	Viral RefSeq genes	Bacteria;Firmicutes;Bacilli;Bacillales;Bacillaceae;Bacillus;Bacillus coagulans	CRISPR (near)identical
XZL9_33:19	XZL9	IMGVR_UViG_3300025540_000001	100	36	0	0	1	36	847	882	1.81e-10	71.9	Engineered;Lab enrichment;Defined media;Unclassified;Engineered;	vOTU_067317	48934	Direct terminal repeats (DTRs)	High-quality	Duplodnaviria;Heunggongvirae;Uroviricota;Caudoviricetes;Caudovirales;;;	Viral RefSeq genes	Bacteria;Firmicutes;Bacilli;Bacillales;Bacillaceae;Bacillus;Bacillus coagulans	CRISPR (near)identical
XZL9_33:19	XZL9	IMGVR_UViG_3300025517_000002	100	36	0	0	1	36	11771	11736	1.81e-10	71.9	Engineered;Lab enrichment;Defined media;Unclassified;Engineered;	Sg_081167	45288	Direct terminal repeats (DTRs)	High-quality	Duplodnaviria;Heunggongvirae;Uroviricota;Caudoviricetes;Caudovirales;Siphoviridae;;	Viral RefSeq genes	Bacteria;Firmicutes;Bacilli;Bacillales;Bacillaceae;Bacillus;Bacillus coagulans	CRISPR (near)identical
XZL9_33:21	XZL9	IMGVR_UViG_3300025517_000002	97.368	38	1	0	1	38	14896	14933	3.19e-09	67.9	Engineered;Lab enrichment;Defined media;Unclassified;Engineered;	Sg_081167	45288	Direct terminal repeats (DTRs)	High-quality	Duplodnaviria;Heunggongvirae;Uroviricota;Caudoviricetes;Caudovirales;Siphoviridae;;	Viral RefSeq genes	Bacteria;Firmicutes;Bacilli;Bacillales;Bacillaceae;Bacillus;Bacillus coagulans	CRISPR (near)identical
XZL9_33:21	XZL9	IMGVR_UViG_3300002951_000001	96.774	31	1	0	1	31	1240	1210	4.79e-05	54	Engineered;Lab enrichment;Defined media;Unclassified;Engineered;	Sg_111311	35384	Linear contig	Genome fragment	Duplodnaviria;Heunggongvirae;Uroviricota;Caudoviricetes;Caudovirales;Siphoviridae;;	Viral RefSeq genes	Bacteria;Firmicutes;Bacilli;Bacillales;Bacillaceae;Bacillus;Bacillus coagulans	CRISPR (near)identical
XZL9_33:21	XZL9	IMGVR_UViG_3300025540_000001	96.774	31	1	0	1	31	48166	48136	4.79e-05	54	Engineered;Lab enrichment;Defined media;Unclassified;Engineered;	vOTU_067317	48934	Direct terminal repeats (DTRs)	High-quality	Duplodnaviria;Heunggongvirae;Uroviricota;Caudoviricetes;Caudovirales;;;	Viral RefSeq genes	Bacteria;Firmicutes;Bacilli;Bacillales;Bacillaceae;Bacillus;Bacillus coagulans	CRISPR (near)identical
XZL9_33:21	XZL9	IMGVR_UViG_3300025523_000001	96.774	31	1	0	1	31	919	889	4.79e-05	54	Engineered;Lab enrichment;Defined media;Unclassified;Engineered;	Sg_111311	40402	Direct terminal repeats (DTRs)	High-quality	Duplodnaviria;Heunggongvirae;Uroviricota;Caudoviricetes;Caudovirales;Siphoviridae;;	Viral RefSeq genes	Bacteria;Firmicutes;Bacilli;Bacillales;Bacillaceae;Bacillus;Bacillus coagulans	CRISPR (near)identical
XZL9_33:27	XZL9	IMGVR_UViG_3300025517_000002	100	36	0	0	1	36	23182	23147	1.81e-10	71.9	Engineered;Lab enrichment;Defined media;Unclassified;Engineered;	Sg_081167	45288	Direct terminal repeats (DTRs)	High-quality	Duplodnaviria;Heunggongvirae;Uroviricota;Caudoviricetes;Caudovirales;Siphoviridae;;	Viral RefSeq genes	Bacteria;Firmicutes;Bacilli;Bacillales;Bacillaceae;Bacillus;Bacillus coagulans	CRISPR (near)identical
XZL9_33:27	XZL9	IMGVR_UViG_3300002951_000003	100	33	0	0	4	36	2370	2338	1.12e-08	65.9	Engineered;Lab enrichment;Defined media;Unclassified;Engineered;	Sg_454728	13683	Linear contig	Genome fragment	Duplodnaviria;Heunggongvirae;Uroviricota;Caudoviricetes;Caudovirales;Siphoviridae;;	Viral RefSeq genes	Bacteria;Firmicutes;Bacilli;Bacillales;Bacillaceae;Bacillus;	CRISPR multiple partial
XZL9_33:27	XZL9	IMGVR_UViG_3300025541_000002	100	33	0	0	4	36	11284	11316	1.12e-08	65.9	Engineered;Lab enrichment;Defined media;Unclassified;Engineered;	Sg_454728	13641	Linear contig	Genome fragment	Duplodnaviria;Heunggongvirae;Uroviricota;Caudoviricetes;Caudovirales;Siphoviridae;;	Viral RefSeq genes	Bacteria;Firmicutes;Bacilli;Bacillales;Bacillaceae;Bacillus;	Similarity to host genome
XZL9_33:29	XZL9	IMGVR_UViG_3300025517_000002	100	36	0	0	1	36	23060	23025	1.81e-10	71.9	Engineered;Lab enrichment;Defined media;Unclassified;Engineered;	Sg_081167	45288	Direct terminal repeats (DTRs)	High-quality	Duplodnaviria;Heunggongvirae;Uroviricota;Caudoviricetes;Caudovirales;Siphoviridae;;	Viral RefSeq genes	Bacteria;Firmicutes;Bacilli;Bacillales;Bacillaceae;Bacillus;Bacillus coagulans	CRISPR (near)identical
XZL9_33:31	XZL9	IMGVR_UViG_3300002951_000001	100	34	0	0	1	34	1407	1374	2.48e-09	67.9	Engineered;Lab enrichment;Defined media;Unclassified;Engineered;	Sg_111311	35384	Linear contig	Genome fragment	Duplodnaviria;Heunggongvirae;Uroviricota;Caudoviricetes;Caudovirales;Siphoviridae;;	Viral RefSeq genes	Bacteria;Firmicutes;Bacilli;Bacillales;Bacillaceae;Bacillus;Bacillus coagulans	CRISPR (near)identical
XZL9_33:31	XZL9	IMGVR_UViG_3300025540_000001	100	34	0	0	1	34	48333	48300	2.48e-09	67.9	Engineered;Lab enrichment;Defined media;Unclassified;Engineered;	vOTU_067317	48934	Direct terminal repeats (DTRs)	High-quality	Duplodnaviria;Heunggongvirae;Uroviricota;Caudoviricetes;Caudovirales;;;	Viral RefSeq genes	Bacteria;Firmicutes;Bacilli;Bacillales;Bacillaceae;Bacillus;Bacillus coagulans	CRISPR (near)identical
XZL9_33:31	XZL9	IMGVR_UViG_3300025523_000001	100	34	0	0	1	34	1086	1053	2.48e-09	67.9	Engineered;Lab enrichment;Defined media;Unclassified;Engineered;	Sg_111311	40402	Direct terminal repeats (DTRs)	High-quality	Duplodnaviria;Heunggongvirae;Uroviricota;Caudoviricetes;Caudovirales;Siphoviridae;;	Viral RefSeq genes	Bacteria;Firmicutes;Bacilli;Bacillales;Bacillaceae;Bacillus;Bacillus coagulans	CRISPR (near)identical
XZL9_33:31	XZL9	IMGVR_UViG_3300025517_000002	100	34	0	0	1	34	14729	14762	2.48e-09	67.9	Engineered;Lab enrichment;Defined media;Unclassified;Engineered;	Sg_081167	45288	Direct terminal repeats (DTRs)	High-quality	Duplodnaviria;Heunggongvirae;Uroviricota;Caudoviricetes;Caudovirales;Siphoviridae;;	Viral RefSeq genes	Bacteria;Firmicutes;Bacilli;Bacillales;Bacillaceae;Bacillus;Bacillus coagulans	CRISPR (near)identical
XZL9_26:1	XZL9	IMGVR_UViG_3300002951_000001	96.97	33	1	0	1	33	15944	15976	3.07e-06	58	Engineered;Lab enrichment;Defined media;Unclassified;Engineered;	Sg_111311	35384	Linear contig	Genome fragment	Duplodnaviria;Heunggongvirae;Uroviricota;Caudoviricetes;Caudovirales;Siphoviridae;;	Viral RefSeq genes	Bacteria;Firmicutes;Bacilli;Bacillales;Bacillaceae;Bacillus;Bacillus coagulans	CRISPR (near)identical
XZL9_26:1	XZL9	IMGVR_UViG_3300025523_000001	96.97	33	1	0	1	33	15623	15655	3.07e-06	58	Engineered;Lab enrichment;Defined media;Unclassified;Engineered;	Sg_111311	40402	Direct terminal repeats (DTRs)	High-quality	Duplodnaviria;Heunggongvirae;Uroviricota;Caudoviricetes;Caudovirales;Siphoviridae;;	Viral RefSeq genes	Bacteria;Firmicutes;Bacilli;Bacillales;Bacillaceae;Bacillus;Bacillus coagulans	CRISPR (near)identical
XZL9_26:2	XZL9	IMGVR_UViG_3300025517_000002	96.667	30	1	0	8	37	17441	17470	0.000179	52	Engineered;Lab enrichment;Defined media;Unclassified;Engineered;	Sg_081167	45288	Direct terminal repeats (DTRs)	High-quality	Duplodnaviria;Heunggongvirae;Uroviricota;Caudoviricetes;Caudovirales;Siphoviridae;;	Viral RefSeq genes	Bacteria;Firmicutes;Bacilli;Bacillales;Bacillaceae;Bacillus;Bacillus coagulans	CRISPR (near)identical
XZL9_26:6	XZL9	GCA_002990925.1	93.939	33	2	0	3	35	88245	88213	0.000624	50.1	NA;NA;NA;NA;NA;NA	Sg_005839	144615	Reference	Reference	Duplodnaviria;Heunggongvirae;Uroviricota;Caudoviricetes;Caudovirales;Herelleviridae;;	Viral RefSeq genes	0	0
XZL9_26:13	XZL9	IMGVR_UViG_3300002948_000017	97.143	35	1	0	2	36	2792	2758	1.75e-07	61.9	Engineered;Lab enrichment;Defined media;Unclassified;Engineered;	Sg_475097	13030	Linear contig	Genome fragment	Duplodnaviria;Heunggongvirae;Uroviricota;Caudoviricetes;Caudovirales;Siphoviridae;;	Viral RefSeq genes	Bacteria;Firmicutes;Bacilli;Bacillales;Bacillaceae;Bacillus;Bacillus coagulans	CRISPR (near)identical
XZL9_26:16	XZL9	IMGVR_UViG_3300002951_000001	100	36	0	0	1	36	8553	8588	1.81e-10	71.9	Engineered;Lab enrichment;Defined media;Unclassified;Engineered;	Sg_111311	35384	Linear contig	Genome fragment	Duplodnaviria;Heunggongvirae;Uroviricota;Caudoviricetes;Caudovirales;Siphoviridae;;	Viral RefSeq genes	Bacteria;Firmicutes;Bacilli;Bacillales;Bacillaceae;Bacillus;Bacillus coagulans	CRISPR (near)identical
XZL9_26:16	XZL9	IMGVR_UViG_3300025523_000001	100	36	0	0	1	36	8232	8267	1.81e-10	71.9	Engineered;Lab enrichment;Defined media;Unclassified;Engineered;	Sg_111311	40402	Direct terminal repeats (DTRs)	High-quality	Duplodnaviria;Heunggongvirae;Uroviricota;Caudoviricetes;Caudovirales;Siphoviridae;;	Viral RefSeq genes	Bacteria;Firmicutes;Bacilli;Bacillales;Bacillaceae;Bacillus;Bacillus coagulans	CRISPR (near)identical
XZL9_26:20	XZL9	IMGVR_UViG_3300025540_000001	100	36	0	0	1	36	847	882	1.81e-10	71.9	Engineered;Lab enrichment;Defined media;Unclassified;Engineered;	vOTU_067317	48934	Direct terminal repeats (DTRs)	High-quality	Duplodnaviria;Heunggongvirae;Uroviricota;Caudoviricetes;Caudovirales;;;	Viral RefSeq genes	Bacteria;Firmicutes;Bacilli;Bacillales;Bacillaceae;Bacillus;Bacillus coagulans	CRISPR (near)identical
XZL9_26:20	XZL9	IMGVR_UViG_3300025517_000002	100	36	0	0	1	36	11771	11736	1.81e-10	71.9	Engineered;Lab enrichment;Defined media;Unclassified;Engineered;	Sg_081167	45288	Direct terminal repeats (DTRs)	High-quality	Duplodnaviria;Heunggongvirae;Uroviricota;Caudoviricetes;Caudovirales;Siphoviridae;;	Viral RefSeq genes	Bacteria;Firmicutes;Bacilli;Bacillales;Bacillaceae;Bacillus;Bacillus coagulans	CRISPR (near)identical
XZL9_26:22	XZL9	IMGVR_UViG_3300025517_000002	97.368	38	1	0	1	38	14896	14933	3.19e-09	67.9	Engineered;Lab enrichment;Defined media;Unclassified;Engineered;	Sg_081167	45288	Direct terminal repeats (DTRs)	High-quality	Duplodnaviria;Heunggongvirae;Uroviricota;Caudoviricetes;Caudovirales;Siphoviridae;;	Viral RefSeq genes	Bacteria;Firmicutes;Bacilli;Bacillales;Bacillaceae;Bacillus;Bacillus coagulans	CRISPR (near)identical
XZL9_26:22	XZL9	IMGVR_UViG_3300002951_000001	96.774	31	1	0	1	31	1240	1210	4.79e-05	54	Engineered;Lab enrichment;Defined media;Unclassified;Engineered;	Sg_111311	35384	Linear contig	Genome fragment	Duplodnaviria;Heunggongvirae;Uroviricota;Caudoviricetes;Caudovirales;Siphoviridae;;	Viral RefSeq genes	Bacteria;Firmicutes;Bacilli;Bacillales;Bacillaceae;Bacillus;Bacillus coagulans	CRISPR (near)identical
XZL9_26:22	XZL9	IMGVR_UViG_3300025540_000001	96.774	31	1	0	1	31	48166	48136	4.79e-05	54	Engineered;Lab enrichment;Defined media;Unclassified;Engineered;	vOTU_067317	48934	Direct terminal repeats (DTRs)	High-quality	Duplodnaviria;Heunggongvirae;Uroviricota;Caudoviricetes;Caudovirales;;;	Viral RefSeq genes	Bacteria;Firmicutes;Bacilli;Bacillales;Bacillaceae;Bacillus;Bacillus coagulans	CRISPR (near)identical
XZL9_26:22	XZL9	IMGVR_UViG_3300025523_000001	96.774	31	1	0	1	31	919	889	4.79e-05	54	Engineered;Lab enrichment;Defined media;Unclassified;Engineered;	Sg_111311	40402	Direct terminal repeats (DTRs)	High-quality	Duplodnaviria;Heunggongvirae;Uroviricota;Caudoviricetes;Caudovirales;Siphoviridae;;	Viral RefSeq genes	Bacteria;Firmicutes;Bacilli;Bacillales;Bacillaceae;Bacillus;Bacillus coagulans	CRISPR (near)identical
XZL9_26:28	XZL9	IMGVR_UViG_3300025517_000002	100	36	0	0	1	36	23182	23147	1.81e-10	71.9	Engineered;Lab enrichment;Defined media;Unclassified;Engineered;	Sg_081167	45288	Direct terminal repeats (DTRs)	High-quality	Duplodnaviria;Heunggongvirae;Uroviricota;Caudoviricetes;Caudovirales;Siphoviridae;;	Viral RefSeq genes	Bacteria;Firmicutes;Bacilli;Bacillales;Bacillaceae;Bacillus;Bacillus coagulans	CRISPR (near)identical
XZL9_26:28	XZL9	IMGVR_UViG_3300002951_000003	100	33	0	0	4	36	2370	2338	1.12e-08	65.9	Engineered;Lab enrichment;Defined media;Unclassified;Engineered;	Sg_454728	13683	Linear contig	Genome fragment	Duplodnaviria;Heunggongvirae;Uroviricota;Caudoviricetes;Caudovirales;Siphoviridae;;	Viral RefSeq genes	Bacteria;Firmicutes;Bacilli;Bacillales;Bacillaceae;Bacillus;	CRISPR multiple partial
XZL9_26:28	XZL9	IMGVR_UViG_3300025541_000002	100	33	0	0	4	36	11284	11316	1.12e-08	65.9	Engineered;Lab enrichment;Defined media;Unclassified;Engineered;	Sg_454728	13641	Linear contig	Genome fragment	Duplodnaviria;Heunggongvirae;Uroviricota;Caudoviricetes;Caudovirales;Siphoviridae;;	Viral RefSeq genes	Bacteria;Firmicutes;Bacilli;Bacillales;Bacillaceae;Bacillus;	Similarity to host genome
XZL9_26:30	XZL9	IMGVR_UViG_3300025517_000002	100	36	0	0	1	36	23060	23025	1.81e-10	71.9	Engineered;Lab enrichment;Defined media;Unclassified;Engineered;	Sg_081167	45288	Direct terminal repeats (DTRs)	High-quality	Duplodnaviria;Heunggongvirae;Uroviricota;Caudoviricetes;Caudovirales;Siphoviridae;;	Viral RefSeq genes	Bacteria;Firmicutes;Bacilli;Bacillales;Bacillaceae;Bacillus;Bacillus coagulans	CRISPR (near)identical
XZL9_26:32	XZL9	IMGVR_UViG_3300002951_000001	100	34	0	0	1	34	1407	1374	2.48e-09	67.9	Engineered;Lab enrichment;Defined media;Unclassified;Engineered;	Sg_111311	35384	Linear contig	Genome fragment	Duplodnaviria;Heunggongvirae;Uroviricota;Caudoviricetes;Caudovirales;Siphoviridae;;	Viral RefSeq genes	Bacteria;Firmicutes;Bacilli;Bacillales;Bacillaceae;Bacillus;Bacillus coagulans	CRISPR (near)identical
XZL9_26:32	XZL9	IMGVR_UViG_3300025540_000001	100	34	0	0	1	34	48333	48300	2.48e-09	67.9	Engineered;Lab enrichment;Defined media;Unclassified;Engineered;	vOTU_067317	48934	Direct terminal repeats (DTRs)	High-quality	Duplodnaviria;Heunggongvirae;Uroviricota;Caudoviricetes;Caudovirales;;;	Viral RefSeq genes	Bacteria;Firmicutes;Bacilli;Bacillales;Bacillaceae;Bacillus;Bacillus coagulans	CRISPR (near)identical
XZL9_26:32	XZL9	IMGVR_UViG_3300025523_000001	100	34	0	0	1	34	1086	1053	2.48e-09	67.9	Engineered;Lab enrichment;Defined media;Unclassified;Engineered;	Sg_111311	40402	Direct terminal repeats (DTRs)	High-quality	Duplodnaviria;Heunggongvirae;Uroviricota;Caudoviricetes;Caudovirales;Siphoviridae;;	Viral RefSeq genes	Bacteria;Firmicutes;Bacilli;Bacillales;Bacillaceae;Bacillus;Bacillus coagulans	CRISPR (near)identical
XZL9_26:32	XZL9	IMGVR_UViG_3300025517_000002	100	34	0	0	1	34	14729	14762	2.48e-09	67.9	Engineered;Lab enrichment;Defined media;Unclassified;Engineered;	Sg_081167	45288	Direct terminal repeats (DTRs)	High-quality	Duplodnaviria;Heunggongvirae;Uroviricota;Caudoviricetes;Caudovirales;Siphoviridae;;	Viral RefSeq genes	Bacteria;Firmicutes;Bacilli;Bacillales;Bacillaceae;Bacillus;Bacillus coagulans	CRISPR (near)identical
