# Supplementary material for: A Genomic Comparative Analysis of Bacillus Coagulans Unravels the Genetic Potential of MA-13 Strain for Biotechnological Applications
Source: Preprints.org preprint supplement (doi:10.20944/preprints202112.0372.v1), 2021-12-22
Supplement: Supplementary file 9 [file Table S8.xlsx]

## Sheet: Sheet1
Table S8. MA-13 genes predicted using Island viewver
Island start	Island end	Length	Method	Gene name	Gene ID	Locus	Gene start	Gene end	Strand	Product	External Annotations
1465165	1474392	9227	Predicted by at least one method	MBF8416948.1		E2E33_000895	1470389	1471528	-1	IS110 family transposase
149192	157818	8626	Predicted by at least one method	MBF8418562.1		E2E33_009650	149582	150133	1	hypothetical protein
149192	157818	8626	Predicted by at least one method	MBF8418561.1		E2E33_009645	150777	150974	-1	aspartate/glutamate racemase family protein
149192	157818	8626	Predicted by at least one method	MBF8418560.1		E2E33_009640	151003	152166	-1	MFS transporter
149192	157818	8626	Predicted by at least one method	MBF8418559.1		E2E33_009635	152216	153511	-1	ATP-grasp domain-containing protein
2984831	3051539	66708	Predicted by at least one method			E2E33_000840	2999713	2999943	-1	IS110 family transposase
149192	157818	8626	Predicted by at least one method			E2E33_011515	155445	156841	-1	MFS transporter
149192	157818	8626	Predicted by at least one method	MBF8418884.1		E2E33_011510	157180	157818	-1	ATP-binding cassette domain-containing protein
655445	659566	4121	Predicted by at least one method			E2E33_006905	655445	655603	-1	PTS mannose transporter subunit IIAB
655445	659566	4121	Predicted by at least one method	MBF8419492.1		E2E33_014690	657446	658066	1	hypothetical protein
2990735	3000717	9982	Predicted by at least one method			E2E33_000840	2999713	2999943	-1	IS110 family transposase
1622319	1658414	36095	Predicted by at least one method			E2E33_007115	1652626	1653927	-1	IS1380 family transposase
781091	837175	56084	Predicted by at least one method	MBF8417467.1		E2E33_003690	781384	782301	1	aldo/keto reductase
781091	837175	56084	Predicted by at least one method	MBF8417468.1		E2E33_003695	782439	782804	-1	hypothetical protein
781091	837175	56084	Predicted by at least one method	MBF8417469.1		E2E33_003700	783148	784116	-1	LCP family protein
781091	837175	56084	Predicted by at least one method	MBF8417470.1		E2E33_003705	784594	786450	1	pre-peptidase C-terminal domain-containing protein
781091	837175	56084	Predicted by at least one method	MBF8417471.1		E2E33_003710	786575	788230	-1	APC family permease
781091	837175	56084	Predicted by at least one method	MBF8417472.1		E2E33_003715	788914	789432	1	hypothetical protein
781091	837175	56084	Predicted by at least one method	MBF8417473.1	cas7c	E2E33_003720	791629	792552	-1	type I-C CRISPR-associated protein Cas7/Csd2
781091	837175	56084	Predicted by at least one method	MBF8417474.1	cas8c	E2E33_003725	792554	794233	-1	type I-C CRISPR-associated protein Cas8c/Csd1
781091	837175	56084	Predicted by at least one method	MBF8417475.1	cas5c	E2E33_003730	794234	794887	-1	type I-C CRISPR-associated protein Cas5
781091	837175	56084	Predicted by at least one method	MBF8417476.1	cas3	E2E33_003735	794891	797041	-1	CRISPR-associated helicase Cas3'
781091	837175	56084	Predicted by at least one method	MBF8417477.1		E2E33_003740	797653	797865	-1	DUF3006 domain-containing protein
781091	837175	56084	Predicted by at least one method	MBF8417478.1		E2E33_003745	797881	799212	-1	MBL fold metallo-hydrolase
781091	837175	56084	Predicted by at least one method	MBF8417479.1		E2E33_003750	799474	799980	1	DUF1648 domain-containing protein
781091	837175	56084	Predicted by at least one method			E2E33_003755	800255	800610	1	MmcQ/YjbR family DNA-binding protein
781091	837175	56084	Predicted by at least one method	MBF8417480.1		E2E33_003760	800613	801596	1	nitronate monooxygenase
781091	837175	56084	Predicted by at least one method			E2E33_003765	802053	802451	-1	class II aldolase/adducin family protein
781091	837175	56084	Predicted by at least one method	MBF8417481.1		E2E33_003770	802611	803363	-1	DNA-binding protein
781091	837175	56084	Predicted by at least one method	MBF8417482.1		E2E33_003775	803364	804206	-1	HipA domain-containing protein
781091	837175	56084	Predicted by at least one method	MBF8417483.1		E2E33_003780	804932	807562	1	dextransucrase
781091	837175	56084	Predicted by at least one method	MBF8416890.1		E2E33_000550	808923	809525	-1	class I SAM-dependent methyltransferase
781091	837175	56084	Predicted by at least one method	MBF8416891.1		E2E33_000555	809652	810434	1	DUF2268 domain-containing protein
781091	837175	56084	Predicted by at least one method	MBF8416892.1		E2E33_000560	811043	811174	1	YjcZ family sporulation protein
781091	837175	56084	Predicted by at least one method	MBF8416893.1		E2E33_000565	811820	812134	1	glycosyltransferase
781091	837175	56084	Predicted by at least one method	MBF8416894.1		E2E33_000570	812516	814483	1	SH3 domain-containing protein
781091	837175	56084	Predicted by at least one method	MBF8416895.1		E2E33_000575	815408	816028	-1	NAD(P)H-dependent oxidoreductase
781091	837175	56084	Predicted by at least one method			E2E33_000580	816250	817391	-1	glutathione-dependent formaldehyde dehydrogenase
1307280	1319543	12263	Predicted by at least one method	MBF8417598.1		E2E33_004395	1315165	1316478	-1	IS1380-like element ISBco1 family transposase
1622319	1658414	36095	Predicted by at least one method	MBF8418096.1		E2E33_007090	1646349	1647768	1	IS1634 family transposase
781091	837175	56084	Predicted by at least one method	MBF8417254.1		E2E33_002575	822113	823372	-1	hypothetical protein
781091	837175	56084	Predicted by at least one method	MBF8417255.1		E2E33_002580	823415	824374	-1	hypothetical protein
781091	837175	56084	Predicted by at least one method	MBF8417256.1		E2E33_002585	824376	825827	-1	flippase
781091	837175	56084	Predicted by at least one method	MBF8417257.1	glf	E2E33_002590	825846	826955	-1	UDP-galactopyranose mutase
781091	837175	56084	Predicted by at least one method	MBF8417258.1		E2E33_002595	826974	827870	-1	glycosyltransferase family 2 protein
781091	837175	56084	Predicted by at least one method	MBF8417259.1		E2E33_002600	827985	829361	-1	cupin domain-containing protein
781091	837175	56084	Predicted by at least one method	MBF8417260.1		E2E33_002605	829358	830506	-1	glycosyltransferase family 4 protein
781091	837175	56084	Predicted by at least one method	MBF8417261.1		E2E33_002610	830503	831552	-1	glycosyltransferase family 4 protein
781091	837175	56084	Predicted by at least one method	MBF8417262.1		E2E33_002615	831637	832737	-1	glycosyltransferase family 4 protein
781091	837175	56084	Predicted by at least one method	MBF8417263.1		E2E33_002620	833683	834378	-1	sugar transferase
781091	837175	56084	Predicted by at least one method	MBF8417264.1	galU	E2E33_002625	834371	835267	-1	UTP--glucose-1-phosphate uridylyltransferase GalU
781091	837175	56084	Predicted by at least one method	MBF8417265.1		E2E33_002630	835589	836353	-1	tyrosine protein phosphatase
781091	837175	56084	Predicted by at least one method	MBF8417266.1		E2E33_002635	836480	837175	-1	CpsD/CapB family tyrosine-protein kinase
781091	837175	56084	Predicted by at least one method	MBF8417267.1		E2E33_002640	837165	837902	-1	capsular biosynthesis protein
1639652	1647768	8116	Predicted by at least one method	MBF8418096.1		E2E33_007090	1646349	1647768	1	IS1634 family transposase
2984831	3051539	66708	Predicted by at least one method	MBF8417531.1		E2E33_004030	2992597	2994102	1	IS21 family transposase
817999	834378	16379	Predicted by at least one method	MBF8417254.1		E2E33_002575	822113	823372	-1	hypothetical protein
817999	834378	16379	Predicted by at least one method	MBF8417255.1		E2E33_002580	823415	824374	-1	hypothetical protein
817999	834378	16379	Predicted by at least one method	MBF8417256.1		E2E33_002585	824376	825827	-1	flippase
817999	834378	16379	Predicted by at least one method	MBF8417257.1	glf	E2E33_002590	825846	826955	-1	UDP-galactopyranose mutase
817999	834378	16379	Predicted by at least one method	MBF8417258.1		E2E33_002595	826974	827870	-1	glycosyltransferase family 2 protein
817999	834378	16379	Predicted by at least one method	MBF8417259.1		E2E33_002600	827985	829361	-1	cupin domain-containing protein
817999	834378	16379	Predicted by at least one method	MBF8417260.1		E2E33_002605	829358	830506	-1	glycosyltransferase family 4 protein
817999	834378	16379	Predicted by at least one method	MBF8417261.1		E2E33_002610	830503	831552	-1	glycosyltransferase family 4 protein
817999	834378	16379	Predicted by at least one method	MBF8417262.1		E2E33_002615	831637	832737	-1	glycosyltransferase family 4 protein
817999	834378	16379	Predicted by at least one method	MBF8417263.1		E2E33_002620	833683	834378	-1	sugar transferase
817999	834378	16379	Predicted by at least one method	MBF8417264.1	galU	E2E33_002625	834371	835267	-1	UTP--glucose-1-phosphate uridylyltransferase GalU
970759	976974	6215	Predicted by at least one method	MBF8418122.1		E2E33_007250	970759	971073	1	multidrug efflux SMR transporter
970759	976974	6215	Predicted by at least one method	MBF8418123.1		E2E33_007255	971129	971626	-1	PaaI family thioesterase
970759	976974	6215	Predicted by at least one method	MBF8418124.1		E2E33_007260	971758	972033	-1	hypothetical protein
970759	976974	6215	Predicted by at least one method	MBF8418125.1		E2E33_007265	972030	972302	-1	hypothetical protein
2990735	3000717	9982	Predicted by at least one method	MBF8417531.1		E2E33_004030	2992597	2994102	1	IS21 family transposase
781091	837175	56084	Predicted by at least one method	MBF8417253.1		E2E33_002570	820453	821688	1	IS256 family transposase
970759	976974	6215	Predicted by at least one method	MBF8418495.1		E2E33_009210	975278	976363	1	glycosyltransferase
970759	976974	6215	Predicted by at least one method	MBF8418494.1		E2E33_009205	976360	976974	1	glycerol-3-phosphate acyltransferase
817999	834378	16379	Predicted by at least one method	MBF8417253.1		E2E33_002570	820453	821688	1	IS256 family transposase
1106366	1110705	4339	Predicted by at least one method	MBF8418014.1		E2E33_006635	1107492	1107926	-1	CPBP family intramembrane metalloprotease
1106366	1110705	4339	Predicted by at least one method	MBF8418015.1		E2E33_006640	1108081	1109397	-1	YcaO-like family protein
1106366	1110705	4339	Predicted by at least one method	MBF8418016.1		E2E33_006645	1109390	1110307	-1	bacteriocin biosynthesis cyclodehydratase
1106366	1110705	4339	Predicted by at least one method			E2E33_006650	1110310	1110705	-1	SagB family peptide dehydrogenase
1307280	1319543	12263	Predicted by at least one method	MBF8418146.1		E2E33_007370	1307280	1307627	-1	YojF family protein
1307280	1319543	12263	Predicted by at least one method	MBF8418147.1	pdxK	E2E33_007375	1307747	1308565	-1	pyridoxine/pyridoxal/pyridoxamine kinase
1307280	1319543	12263	Predicted by at least one method	MBF8417076.1		E2E33_001565	1310403	1311089	-1	ABC transporter ATP-binding protein
1307280	1319543	12263	Predicted by at least one method	MBF8417077.1		E2E33_001570	1311086	1311604	-1	stage II sporulation protein M
1307280	1319543	12263	Predicted by at least one method	MBF8417078.1		E2E33_001575	1311650	1313275	-1	hypothetical protein
1307280	1319543	12263	Predicted by at least one method	MBF8417079.1		E2E33_001580	1313350	1313577	-1	uberolysin/carnocyclin family circular bacteriocin
781091	837175	56084	Predicted by at least one method			E2E33_000585	817999	819080	1	IS5 family transposase
1307280	1319543	12263	Predicted by at least one method	MBF8417599.1		E2E33_004400	1316826	1317098	1	helix-turn-helix transcriptional regulator
1307280	1319543	12263	Predicted by at least one method	MBF8417600.1		E2E33_004405	1317223	1317570	-1	general stress protein
1307280	1319543	12263	Predicted by at least one method	MBF8417601.1		E2E33_004410	1317718	1318404	1	uracil-DNA glycosylase
1307280	1319543	12263	Predicted by at least one method	MBF8417602.1		E2E33_004415	1318763	1319008	1	YwdI family protein
1307280	1319543	12263	Predicted by at least one method	MBF8417603.1		E2E33_004420	1319172	1319543	1	DUF423 domain-containing protein
1465165	1474392	9227	Predicted by at least one method	MBF8416944.1		E2E33_000865	1465165	1466238	1	iron ABC transporter permease
1465165	1474392	9227	Predicted by at least one method	MBF8416945.1		E2E33_000870	1466244	1467005	1	ABC transporter ATP-binding protein
1465165	1474392	9227	Predicted by at least one method			E2E33_000875	1467021	1467533	1	ABC transporter
817999	834378	16379	Predicted by at least one method			E2E33_000585	817999	819080	1	IS5 family transposase
1465165	1474392	9227	Predicted by at least one method			E2E33_000885	1469298	1469798	1	ABC transporter substrate-binding protein
1465165	1474392	9227	Predicted by at least one method	MBF8416947.1		E2E33_000890	1469932	1470123	1	YbxH family protein
1622319	1658414	36095	Predicted by at least one method	MBF8418098.1		E2E33_007105	1649848	1651368	1	IS5 family transposase
1465165	1474392	9227	Predicted by at least one method	MBF8416949.1		E2E33_000900	1471770	1471955	-1	DNA-binding protein
1465165	1474392	9227	Predicted by at least one method	MBF8416950.1		E2E33_000905	1472185	1473084	1	SDR family oxidoreductase
1465165	1474392	9227	Predicted by at least one method	MBF8416951.1		E2E33_000910	1473190	1474392	-1	AGE family epimerase/isomerase
1603961	1613590	9629	Predicted by at least one method	MBF8416827.1		E2E33_000200	1603961	1604161	-1	cold-shock protein
1603961	1613590	9629	Predicted by at least one method	MBF8416828.1		E2E33_000205	1604500	1605699	1	beta-ketoacyl synthase
1603961	1613590	9629	Predicted by at least one method	MBF8416829.1		E2E33_000210	1605723	1607153	1	HAMP domain-containing histidine kinase
1603961	1613590	9629	Predicted by at least one method	MBF8416830.1		E2E33_000215	1607608	1607922	1	ABC transporter ATP-binding protein
1603961	1613590	9629	Predicted by at least one method	MBF8416831.1		E2E33_000220	1608253	1609899	1	copper resistance protein CopC
1603961	1613590	9629	Predicted by at least one method	MBF8416832.1		E2E33_000225	1609951	1610565	1	DUF1775 domain-containing protein
149192	157818	8626	Predicted by at least one method			E2E33_009655	149192	149466	-1	IS5/IS1182 family transposase
1603961	1613590	9629	Predicted by at least one method	MBF8419092.1		E2E33_012575	1612108	1612302	1	hypothetical protein
1603961	1613590	9629	Predicted by at least one method	MBF8419093.1		E2E33_012580	1612304	1613590	1	LacI family DNA-binding transcriptional regulator
1622319	1658414	36095	Predicted by at least one method	MBF8419101.1		E2E33_012625	1622319	1623398	1	PRK06851 family protein
1622319	1658414	36095	Predicted by at least one method	MBF8419102.1		E2E33_012630	1624121	1625992	1	anaerobic ribonucleoside triphosphate reductase
1622319	1658414	36095	Predicted by at least one method	MBF8419103.1	nrdG	E2E33_012635	1625989	1626465	1	anaerobic ribonucleoside-triphosphate reductase activating protein
1622319	1658414	36095	Predicted by at least one method	MBF8419104.1		E2E33_012640	1627750	1629081	1	hypothetical protein
1622319	1658414	36095	Predicted by at least one method	MBF8419105.1		E2E33_012645	1629065	1631041	1	hypothetical protein
1622319	1658414	36095	Predicted by at least one method	MBF8419106.1		E2E33_012650	1631025	1632902	1	hypothetical protein
2984831	3051539	66708	Predicted by at least one method	MBF8417201.1		E2E33_002265	3047452	3047640	-1	IS5/IS1182 family transposase
1622319	1658414	36095	Predicted by at least one method	MBF8419108.1		E2E33_012660	1634526	1635062	-1	DUF2247 family protein
1622319	1658414	36095	Predicted by at least one method	MBF8419109.1		E2E33_012665	1635217	1635534	-1	SMI1/KNR4 family protein
1622319	1658414	36095	Predicted by at least one method	MBF8419110.1		E2E33_012670	1636561	1637817	1	cation:dicarboxylase symporter family transporter
1622319	1658414	36095	Predicted by at least one method	MBF8419111.1		E2E33_012675	1638114	1639643	1	type I restriction-modification system subunit M
1622319	1658414	36095	Predicted by at least one method	MBF8419112.1		E2E33_012680	1639652	1640908	1	restriction endonuclease subunit S
1622319	1658414	36095	Predicted by at least one method	MBF8419113.1		E2E33_012685	1640952	1644059	1	type I restriction endonuclease subunit R
1622319	1658414	36095	Predicted by at least one method	MBF8419114.1		E2E33_012690	1644073	1644795	1	M48 family metallopeptidase
149192	157818	8626	Predicted by at least one method			E2E33_011520	154750	155161	1	IS630 family transposase
2984831	3051539	66708	Predicted by at least one method			E2E33_000860	3001837	3002060	1	ISLre2 family transposase
1622319	1658414	36095	Predicted by at least one method			E2E33_007095	1648172	1648561	1	sugar nucleotide-binding protein
1622319	1658414	36095	Predicted by at least one method	MBF8418097.1	rfbB	E2E33_007100	1648562	1649590	1	dTDP-glucose 4,6-dehydratase
970759	976974	6215	Predicted by at least one method	MBF8418126.1		E2E33_007270	972304	973245	-1	Rpn family recombination-promoting nuclease/putative transposase
1622319	1658414	36095	Predicted by at least one method	MBF8418099.1		E2E33_007110	1651414	1652403	-1	LD-carboxypeptidase
970759	976974	6215	Predicted by at least one method	MBF8418496.1		E2E33_009215	974290	975009	-1	Rpn family recombination-promoting nuclease/putative transposase
1622319	1658414	36095	Predicted by at least one method	MBF8417024.1		E2E33_001305	1655941	1656732	1	maltose-6'-phosphate glucosidase
1622319	1658414	36095	Predicted by at least one method	MBF8417025.1		E2E33_001310	1657285	1657773	1	PTS glucose transporter subunit IIA
1622319	1658414	36095	Predicted by at least one method	MBF8417026.1		E2E33_001315	1657941	1658414	-1	glutathione peroxidase
1639652	1647768	8116	Predicted by at least one method	MBF8419112.1		E2E33_012680	1639652	1640908	1	restriction endonuclease subunit S
1639652	1647768	8116	Predicted by at least one method	MBF8419113.1		E2E33_012685	1640952	1644059	1	type I restriction endonuclease subunit R
1639652	1647768	8116	Predicted by at least one method	MBF8419114.1		E2E33_012690	1644073	1644795	1	M48 family metallopeptidase
781091	837175	56084	Predicted by at least one method	MBF8417466.1		E2E33_003685	781091	781187	-1	transposase
1106366	1110705	4339	Predicted by at least one method			E2E33_006630	1106366	1107019	1	transposase
1728805	1734298	5493	Predicted by at least one method	MBF8417526.1	cas7c	E2E33_004005	1727955	1728815	1	type I-C CRISPR-associated protein Cas7/Csd2
1728805	1734298	5493	Predicted by at least one method	MBF8417527.1	cas4	E2E33_004010	1728805	1729461	1	CRISPR-associated protein Cas4
1728805	1734298	5493	Predicted by at least one method	MBF8417528.1	cas1c	E2E33_004015	1729458	1730489	1	type I-C CRISPR-associated endonuclease Cas1
1728805	1734298	5493	Predicted by at least one method	MBF8417529.1	cas2	E2E33_004020	1730500	1730790	1	CRISPR-associated endonuclease Cas2
1728805	1734298	5493	Predicted by at least one method	MBF8416877.1		E2E33_000480	1733984	1734298	-1	hypothetical protein
2201079	2237072	35993	Predicted by at least one method	MBF8418911.1		E2E33_011655	2201079	2201753	1	hypothetical protein
2201079	2237072	35993	Predicted by at least one method	MBF8418912.1		E2E33_011660	2201770	2202546	1	hypothetical protein
2201079	2237072	35993	Predicted by at least one method	MBF8418913.1		E2E33_011665	2202798	2203973	-1	site-specific integrase
2201079	2237072	35993	Predicted by at least one method	MBF8418914.1		E2E33_011670	2204019	2204489	-1	ImmA/IrrE family metallo-endopeptidase
2201079	2237072	35993	Predicted by at least one method	MBF8418915.1		E2E33_011675	2204517	2204837	-1	XRE family transcriptional regulator
2201079	2237072	35993	Predicted by at least one method	MBF8418916.1		E2E33_011680	2205040	2205255	1	XRE family transcriptional regulator
2201079	2237072	35993	Predicted by at least one method	MBF8418917.1		E2E33_011685	2205272	2205544	1	hypothetical protein
2201079	2237072	35993	Predicted by at least one method	MBF8418918.1		E2E33_011690	2205586	2205726	1	hypothetical protein
2201079	2237072	35993	Predicted by at least one method	MBF8418919.1		E2E33_011695	2205751	2205921	1	hypothetical protein
2201079	2237072	35993	Predicted by at least one method	MBF8418920.1		E2E33_011700	2206061	2206321	1	hypothetical protein
2201079	2237072	35993	Predicted by at least one method	MBF8418921.1		E2E33_011705	2206395	2207618	1	ATP-dependent helicase
2201079	2237072	35993	Predicted by at least one method	MBF8418922.1		E2E33_011710	2207618	2207890	1	hypothetical protein
2201079	2237072	35993	Predicted by at least one method	MBF8418923.1		E2E33_011715	2207923	2208204	1	hypothetical protein
2201079	2237072	35993	Predicted by at least one method	MBF8418924.1		E2E33_011720	2208349	2208633	1	VRR-NUC domain-containing protein
2201079	2237072	35993	Predicted by at least one method	MBF8418925.1		E2E33_011725	2208630	2210456	1	AAA family ATPase
2201079	2237072	35993	Predicted by at least one method	MBF8418926.1		E2E33_011730	2210456	2210659	1	hypothetical protein
2201079	2237072	35993	Predicted by at least one method	MBF8418927.1		E2E33_011735	2210661	2211143	1	DUF669 domain-containing protein
2201079	2237072	35993	Predicted by at least one method	MBF8418928.1		E2E33_011740	2211233	2211394	1	hypothetical protein
2201079	2237072	35993	Predicted by at least one method	MBF8418929.1		E2E33_011745	2211413	2211571	1	hypothetical protein
2201079	2237072	35993	Predicted by at least one method	MBF8418930.1		E2E33_011750	2211599	2211985	1	hypothetical protein
2201079	2237072	35993	Predicted by at least one method	MBF8418931.1		E2E33_011755	2211993	2212385	1	HNH endonuclease
2201079	2237072	35993	Predicted by at least one method	MBF8418932.1		E2E33_011760	2212382	2214076	1	hypothetical protein
2201079	2237072	35993	Predicted by at least one method	MBF8418933.1		E2E33_011765	2214077	2214271	1	hypothetical protein
2201079	2237072	35993	Predicted by at least one method	MBF8418934.1		E2E33_011770	2214287	2216149	1	DNA primase
2201079	2237072	35993	Predicted by at least one method	MBF8418935.1		E2E33_011775	2216591	2216986	1	DUF1492 domain-containing protein
2201079	2237072	35993	Predicted by at least one method	MBF8418936.1		E2E33_011780	2217255	2217467	1	hypothetical protein
2201079	2237072	35993	Predicted by at least one method	MBF8418937.1		E2E33_011785	2217464	2217844	1	HNH endonuclease
2201079	2237072	35993	Predicted by at least one method	MBF8418938.1		E2E33_011790	2217979	2218407	1	P27 family phage terminase small subunit
2201079	2237072	35993	Predicted by at least one method	MBF8418939.1		E2E33_011795	2218404	2220149	1	terminase large subunit
2201079	2237072	35993	Predicted by at least one method	MBF8418940.1		E2E33_011800	2220183	2220443	-1	hypothetical protein
2201079	2237072	35993	Predicted by at least one method	MBF8418941.1		E2E33_011805	2220502	2221719	1	phage portal protein
2201079	2237072	35993	Predicted by at least one method	MBF8418942.1		E2E33_011810	2221685	2222266	1	HK97 family phage prohead protease
2201079	2237072	35993	Predicted by at least one method	MBF8418943.1		E2E33_011815	2222259	2223674	1	phage major capsid protein
2201079	2237072	35993	Predicted by at least one method	MBF8418944.1		E2E33_011820	2223677	2223940	1	phage gp6-like head-tail connector protein
2201079	2237072	35993	Predicted by at least one method	MBF8418945.1		E2E33_011825	2223918	2224250	1	hypothetical protein
2201079	2237072	35993	Predicted by at least one method	MBF8418946.1		E2E33_011830	2224240	2224572	1	hypothetical protein
2201079	2237072	35993	Predicted by at least one method	MBF8418947.1		E2E33_011835	2224565	2224939	1	HK97 gp10 family phage protein
2201079	2237072	35993	Predicted by at least one method	MBF8418948.1		E2E33_011840	2224946	2225569	1	phage tail protein
2201079	2237072	35993	Predicted by at least one method	MBF8418949.1		E2E33_011845	2225575	2225964	1	hypothetical protein
2201079	2237072	35993	Predicted by at least one method	MBF8418950.1		E2E33_011850	2226210	2229455	1	phage tail tape measure protein
2201079	2237072	35993	Predicted by at least one method	MBF8418951.1		E2E33_011855	2229452	2229859	1	phage tail family protein
2201079	2237072	35993	Predicted by at least one method	MBF8418952.1		E2E33_011860	2229861	2230967	1	phage tail protein
2201079	2237072	35993	Predicted by at least one method	MBF8418953.1		E2E33_011865	2230981	2231226	1	hypothetical protein
2201079	2237072	35993	Predicted by at least one method	MBF8418954.1		E2E33_011870	2231239	2231523	1	hypothetical protein
2201079	2237072	35993	Predicted by at least one method	MBF8418955.1		E2E33_011875	2231520	2232680	1	hypothetical protein
2201079	2237072	35993	Predicted by at least one method	MBF8418956.1		E2E33_011880	2232852	2233247	1	phage holin family protein
2201079	2237072	35993	Predicted by at least one method	MBF8418957.1		E2E33_011885	2233372	2234064	1	M15 family metallopeptidase
2201079	2237072	35993	Predicted by at least one method	MBF8418958.1		E2E33_011890	2234127	2234663	-1	DUF4190 domain-containing protein
2201079	2237072	35993	Predicted by at least one method	MBF8418959.1		E2E33_011895	2234660	2234866	-1	helix-turn-helix domain-containing protein
2201079	2237072	35993	Predicted by at least one method	MBF8418960.1		E2E33_011900	2235341	2236525	1	cell division protein FtsK
2201079	2237072	35993	Predicted by at least one method	MBF8418961.1		E2E33_011905	2236461	2237072	1	replication-relaxation family protein
2201770	2205921	4151	Predicted by at least one method	MBF8418912.1		E2E33_011660	2201770	2202546	1	hypothetical protein
2201770	2205921	4151	Predicted by at least one method	MBF8418913.1		E2E33_011665	2202798	2203973	-1	site-specific integrase
2201770	2205921	4151	Predicted by at least one method	MBF8418914.1		E2E33_011670	2204019	2204489	-1	ImmA/IrrE family metallo-endopeptidase
2201770	2205921	4151	Predicted by at least one method	MBF8418915.1		E2E33_011675	2204517	2204837	-1	XRE family transcriptional regulator
2201770	2205921	4151	Predicted by at least one method	MBF8418916.1		E2E33_011680	2205040	2205255	1	XRE family transcriptional regulator
2201770	2205921	4151	Predicted by at least one method	MBF8418917.1		E2E33_011685	2205272	2205544	1	hypothetical protein
2201770	2205921	4151	Predicted by at least one method	MBF8418918.1		E2E33_011690	2205586	2205726	1	hypothetical protein
2201770	2205921	4151	Predicted by at least one method	MBF8418919.1		E2E33_011695	2205751	2205921	1	hypothetical protein
2229452	2234866	5414	Predicted by at least one method	MBF8418950.1		E2E33_011850	2226210	2229455	1	phage tail tape measure protein
2229452	2234866	5414	Predicted by at least one method	MBF8418951.1		E2E33_011855	2229452	2229859	1	phage tail family protein
2229452	2234866	5414	Predicted by at least one method	MBF8418952.1		E2E33_011860	2229861	2230967	1	phage tail protein
2229452	2234866	5414	Predicted by at least one method	MBF8418953.1		E2E33_011865	2230981	2231226	1	hypothetical protein
2229452	2234866	5414	Predicted by at least one method	MBF8418954.1		E2E33_011870	2231239	2231523	1	hypothetical protein
2229452	2234866	5414	Predicted by at least one method	MBF8418955.1		E2E33_011875	2231520	2232680	1	hypothetical protein
2229452	2234866	5414	Predicted by at least one method	MBF8418956.1		E2E33_011880	2232852	2233247	1	phage holin family protein
2229452	2234866	5414	Predicted by at least one method	MBF8418957.1		E2E33_011885	2233372	2234064	1	M15 family metallopeptidase
2229452	2234866	5414	Predicted by at least one method	MBF8418958.1		E2E33_011890	2234127	2234663	-1	DUF4190 domain-containing protein
2229452	2234866	5414	Predicted by at least one method	MBF8418959.1		E2E33_011895	2234660	2234866	-1	helix-turn-helix domain-containing protein
2809602	2819531	9929	Predicted by at least one method	MBF8417198.1		E2E33_002245	2809177	2809605	1	cell wall hydrolase
2809602	2819531	9929	Predicted by at least one method	MBF8417197.1		E2E33_002240	2809602	2810792	-1	MFS transporter
2809602	2819531	9929	Predicted by at least one method	MBF8417196.1		E2E33_002235	2811105	2811851	-1	SDR family oxidoreductase
2809602	2819531	9929	Predicted by at least one method	MBF8417192.1	arsB	E2E33_002215	2815281	2816342	-1	ACR3 family arsenite efflux transporter
2809602	2819531	9929	Predicted by at least one method	MBF8417193.1	arsC	E2E33_002220	2814838	2815260	-1	arsenate reductase (thioredoxin)
2809602	2819531	9929	Predicted by at least one method	MBF8417195.1	arsA	E2E33_002230	2812644	2814404	-1	arsenical pump-driving ATPase
2809602	2819531	9929	Predicted by at least one method	MBF8417194.1	arsD	E2E33_002225	2814423	2814782	-1	arsenite efflux transporter metallochaperone ArsD
2809602	2819531	9929	Predicted by at least one method	MBF8417191.1		E2E33_002210	2816370	2816717	-1	winged helix-turn-helix transcriptional regulator
2809602	2819531	9929	Predicted by at least one method	MBF8417225.1		E2E33_002400	2818111	2818254	-1	hypothetical protein
2809602	2819531	9929	Predicted by at least one method	MBF8417224.1		E2E33_002395	2818548	2819531	-1	L-lactate dehydrogenase
2984831	3051539	66708	Predicted by at least one method	MBF8417918.1		E2E33_006145	2984831	2985040	1	aspartyl-phosphate phosphatase Spo0E family protein
2984831	3051539	66708	Predicted by at least one method			E2E33_000130	2986670	2986783	1	CoA transferase
2984831	3051539	66708	Predicted by at least one method	MBF8416815.1		E2E33_000135	2987206	2988642	-1	radical SAM protein
2984831	3051539	66708	Predicted by at least one method	MBF8416816.1		E2E33_000140	2988883	2989791	1	superoxide dismutase
2984831	3051539	66708	Predicted by at least one method	MBF8416817.1		E2E33_000145	2989914	2990060	-1	hypothetical protein
2984831	3051539	66708	Predicted by at least one method	MBF8416818.1		E2E33_000150	2990735	2991088	-1	hypothetical protein
1465165	1474392	9227	Predicted by at least one method	MBF8416946.1		E2E33_000880	1467767	1469062	1	transposase
2984831	3051539	66708	Predicted by at least one method	MBF8417530.1		E2E33_004025	2994099	2994851	1	ATP-binding protein
1603961	1613590	9629	Predicted by at least one method	MBF8416833.1		E2E33_000230	1610948	1611044	1	transposase
2984831	3051539	66708	Predicted by at least one method	MBF8416939.1		E2E33_000825	2996760	2997767	-1	putative sulfate exporter family transporter
2984831	3051539	66708	Predicted by at least one method	MBF8416940.1		E2E33_000830	2997961	2998392	-1	universal stress protein
1622319	1658414	36095	Predicted by at least one method	MBF8419107.1		E2E33_012655	1632973	1634325	-1	transposase
1622319	1658414	36095	Predicted by at least one method	MBF8419115.1		E2E33_012695	1644988	1645348	1	transposase
2984831	3051539	66708	Predicted by at least one method			E2E33_000845	3000162	3000325	-1	helix-turn-helix domain-containing protein
2984831	3051539	66708	Predicted by at least one method	MBF8416942.1		E2E33_000850	3000499	3000717	1	hypothetical protein
2984831	3051539	66708	Predicted by at least one method	MBF8416943.1		E2E33_000855	3000753	3001586	-1	TrkA family potassium uptake protein
1639652	1647768	8116	Predicted by at least one method	MBF8419115.1		E2E33_012695	1644988	1645348	1	transposase
2984831	3051539	66708	Predicted by at least one method	MBF8417185.1		E2E33_002175	3009369	3010448	1	ABC transporter ATP-binding protein
2984831	3051539	66708	Predicted by at least one method	MBF8417186.1		E2E33_002180	3010445	3011383	1	sugar ABC transporter permease
2984831	3051539	66708	Predicted by at least one method	MBF8417187.1		E2E33_002185	3011380	3012198	1	carbohydrate ABC transporter permease
2984831	3051539	66708	Predicted by at least one method	MBF8417188.1		E2E33_002190	3012462	3013805	1	extracellular solute-binding protein
2984831	3051539	66708	Predicted by at least one method	MBF8417189.1		E2E33_002195	3013825	3014622	1	glycerophosphodiester phosphodiesterase
2984831	3051539	66708	Predicted by at least one method			E2E33_002200	3014810	3015163	1	DUF2935 domain-containing protein
2984831	3051539	66708	Predicted by at least one method	MBF8416938.1		E2E33_000820	2996197	2996448	1	transposase
2984831	3051539	66708	Predicted by at least one method			E2E33_000400	3016566	3016652	1	flagellin
2984831	3051539	66708	Predicted by at least one method	MBF8416863.1		E2E33_000405	3016740	3017105	1	glycosyltransferase family 2 protein
2984831	3051539	66708	Predicted by at least one method	MBF8416864.1		E2E33_000410	3017128	3018060	1	hypothetical protein
2984831	3051539	66708	Predicted by at least one method	MBF8416865.1		E2E33_000415	3018638	3019765	1	hypothetical protein
2984831	3051539	66708	Predicted by at least one method			E2E33_000420	3020633	3021794	1	flagellin
2984831	3051539	66708	Predicted by at least one method	MBF8417226.1		E2E33_002405	3023265	3024446	-1	permease
2984831	3051539	66708	Predicted by at least one method	MBF8417227.1		E2E33_002410	3024448	3025227	-1	ABC transporter permease
2984831	3051539	66708	Predicted by at least one method	MBF8416804.1		E2E33_000065	3026614	3027486	1	ABC transporter ATP-binding protein
2984831	3051539	66708	Predicted by at least one method	MBF8416805.1		E2E33_000070	3027488	3028237	1	ABC transporter permease
2984831	3051539	66708	Predicted by at least one method	MBF8416806.1		E2E33_000075	3028234	3028530	1	LlsX family protein
2984831	3051539	66708	Predicted by at least one method	MBF8416807.1		E2E33_000080	3028523	3029020	1	streptolysin associated protein SagB
2984831	3051539	66708	Predicted by at least one method	MBF8416814.1		E2E33_000120	3031025	3031528	1	hypothetical protein
2984831	3051539	66708	Predicted by at least one method			E2E33_000125	3031910	3032509	-1	group II intron reverse transcriptase/maturase
2984831	3051539	66708	Predicted by at least one method	MBF8416941.1		E2E33_000835	2999132	2999323	1	transposase
2984831	3051539	66708	Predicted by at least one method	MBF8417534.1		E2E33_004050	3034012	3034242	-1	YcxB family protein
2984831	3051539	66708	Predicted by at least one method	MBF8417535.1		E2E33_004055	3035707	3035913	-1	hypothetical protein
2984831	3051539	66708	Predicted by at least one method	MBF8417122.1		E2E33_001830	3037486	3037745	1	CDP-glycerol glycerophosphotransferase family protein
2984831	3051539	66708	Predicted by at least one method	MBF8417123.1		E2E33_001835	3038008	3038985	1	glycosyltransferase family 2 protein
2984831	3051539	66708	Predicted by at least one method	MBF8417124.1		E2E33_001840	3039423	3040976	1	hypothetical protein
2984831	3051539	66708	Predicted by at least one method			E2E33_001845	3041801	3041923	1	adenylyltransferase/cytidyltransferase family protein
2984831	3051539	66708	Predicted by at least one method	MBF8417199.1		E2E33_002250	3043303	3044784	-1	sucrose-6-phosphate hydrolase
2984831	3051539	66708	Predicted by at least one method	MBF8417200.1		E2E33_002255	3044997	3046961	1	PTS beta-glucoside transporter subunit IIBCA
2984831	3051539	66708	Predicted by at least one method			E2E33_002260	3046990	3047402	1	ROK family protein
2984831	3051539	66708	Predicted by at least one method	MBF8417190.1		E2E33_002205	3015261	3015474	1	transposase
2984831	3051539	66708	Predicted by at least one method	MBF8417533.1		E2E33_004045	3033510	3033952	1	transposase
2984831	3051539	66708	Predicted by at least one method	MBF8417759.1		E2E33_005245	3049232	3050092	-1	DUF421 domain-containing protein
2984831	3051539	66708	Predicted by at least one method	MBF8417760.1		E2E33_005250	3050126	3050332	-1	DUF1657 domain-containing protein
2984831	3051539	66708	Predicted by at least one method	MBF8417761.1	spoVAD	E2E33_005255	3050526	3051539	-1	stage V sporulation protein AD
2990735	3000717	9982	Predicted by at least one method	MBF8416818.1		E2E33_000150	2990735	2991088	-1	hypothetical protein
2984831	3051539	66708	Predicted by at least one method	MBF8417758.1		E2E33_005240	3048641	3048948	1	transposase
2990735	3000717	9982	Predicted by at least one method	MBF8417530.1		E2E33_004025	2994099	2994851	1	ATP-binding protein
2990735	3000717	9982	Predicted by at least one method	MBF8416938.1		E2E33_000820	2996197	2996448	1	transposase
2990735	3000717	9982	Predicted by at least one method	MBF8416939.1		E2E33_000825	2996760	2997767	-1	putative sulfate exporter family transporter
2990735	3000717	9982	Predicted by at least one method	MBF8416940.1		E2E33_000830	2997961	2998392	-1	universal stress protein
2990735	3000717	9982	Predicted by at least one method	MBF8416941.1		E2E33_000835	2999132	2999323	1	transposase
3031910	3037745	5835	Predicted by at least one method	MBF8417533.1		E2E33_004045	3033510	3033952	1	transposase
2990735	3000717	9982	Predicted by at least one method			E2E33_000845	3000162	3000325	-1	helix-turn-helix domain-containing protein
2990735	3000717	9982	Predicted by at least one method	MBF8416942.1		E2E33_000850	3000499	3000717	1	hypothetical protein
3023265	3029020	5755	Predicted by at least one method	MBF8417226.1		E2E33_002405	3023265	3024446	-1	permease
3023265	3029020	5755	Predicted by at least one method	MBF8417227.1		E2E33_002410	3024448	3025227	-1	ABC transporter permease
3023265	3029020	5755	Predicted by at least one method	MBF8416804.1		E2E33_000065	3026614	3027486	1	ABC transporter ATP-binding protein
3023265	3029020	5755	Predicted by at least one method	MBF8416805.1		E2E33_000070	3027488	3028237	1	ABC transporter permease
3023265	3029020	5755	Predicted by at least one method	MBF8416806.1		E2E33_000075	3028234	3028530	1	LlsX family protein
3023265	3029020	5755	Predicted by at least one method	MBF8416807.1		E2E33_000080	3028523	3029020	1	streptolysin associated protein SagB
3031910	3037745	5835	Predicted by at least one method			E2E33_000125	3031910	3032509	-1	group II intron reverse transcriptase/maturase
655445	659566	4121	Predicted by at least one method			E2E33_014685	658257	659566	1	transposase family protein
3031910	3037745	5835	Predicted by at least one method	MBF8417534.1		E2E33_004050	3034012	3034242	-1	YcxB family protein
3031910	3037745	5835	Predicted by at least one method	MBF8417535.1		E2E33_004055	3035707	3035913	-1	hypothetical protein
3031910	3037745	5835	Predicted by at least one method	MBF8417122.1		E2E33_001830	3037486	3037745	1	CDP-glycerol glycerophosphotransferase family protein
