# Supplementary material for: A Genomic Comparative Analysis of Bacillus Coagulans Unravels the Genetic Potential of MA-13 Strain for Biotechnological Applications
Source: Preprints.org preprint supplement (doi:10.20944/preprints202112.0372.v1), 2021-12-22
Supplement: Supplementary file 10 [file Table S9.xlsx]

## Sheet: Sheet1
Table S9. MA-13 list of genes belonging viruses/prophage and bacteria identified using PHASTER tool
#	CDS Position	BLAST Hit	E-Value	Sequence
1	31515..31532	attL	0	Showinfo_outline
2	complement(31579..32754)	PHAGE_Bacill_phBC6A52_NC_004821: DNA integration/recombination/invertion protein; PP_02687; phage(gi31415821)	2.52e-39	Showinfo_outline
3	complement(32800..33285)	PHAGE_Clostr_phiCT453A_NC_028991: hypothetical protein; PP_02688; phage(gi100004)	3.95e-37	Showinfo_outline
4	complement(33298..33660)	PHAGE_Paenib_PG1_NC_021558: LexA repressor; PP_02689; phage(gi514231212)	4.52e-32	Showinfo_outline
5	33737..34036	PHAGE_Staphy_X2_NC_007065: ORF032; PP_02690; phage(gi66394701)	1.02e-15	Showinfo_outline
6	34053..34325	PHAGE_Bacill_PfEFR_4_NC_048641: holin; PP_02691; phage(gi100034)	5.45e-07	Showinfo_outline
7	34367..34507	hypothetical; PP_02692	0	Showinfo_outline
8	34532..34702	hypothetical; PP_02693	0	Showinfo_outline
9	34781..34855	hypothetical; PP_02694	0	Showinfo_outline
10	34872..35102	hypothetical; PP_02695	0	Showinfo_outline
11	35164..36399	PHAGE_Entero_IME_EF3_NC_023595: DNA helicase; PP_02696; phage(gi589287182)	9.23e-32	Showinfo_outline
12	36432..36671	PHAGE_Staphy_P282_NC_048634: tail assembly protein; PP_02697; phage(gi100053)	1.16e-07	Showinfo_outline
13	36704..36985	PHAGE_Lactob_phiLdb_NC_022762: hypothetical protein; PP_02698; phage(gi571798096)	6.9e-09	Showinfo_outline
14	37130..37414	PHAGE_Entero_IME_EFm1_NC_024356: hypothetical protein; PP_02699; phage(gi658310507)	6.32e-12	Showinfo_outline
15	37489..39237	PHAGE_Strept_phiARI0131_1_NC_031901: hypothetical protein; PP_02700; phage(gi100038)	4.29e-17	Showinfo_outline
16	39288..39440	hypothetical; PP_02701	0	Showinfo_outline
17	39442..39924	PHAGE_Microb_Hendrix_NC_047977: hypothetical protein; PP_02702; phage(gi100144)	2.42e-07	Showinfo_outline
18	40005..40175	hypothetical; PP_02703	0	Showinfo_outline
19	40194..40352	hypothetical; PP_02704	0	Showinfo_outline
20	40389..40766	PHAGE_Entero_EfV12_phi1_NC_048087: hypothetical protein; PP_02705; phage(gi100063)	6.94e-42	Showinfo_outline
21	40804..41166	PHAGE_Pectob_phiTE_NC_020201: hypothetical protein; PP_02706; phage(gi448244743)	1.68e-12	Showinfo_outline
22	41274..42857	PHAGE_Entero_IME_EFm5_NC_028826: DNA polymerase; PP_02707; phage(gi971746927)	5.07e-72	Showinfo_outline
23	42858..43052	hypothetical; PP_02708	0	Showinfo_outline
24	43059..44930	PHAGE_Lactoc_98201_NC_031064: hypothetical protein; PP_02709; phage(gi100015)	1.05e-37	Showinfo_outline
25	45327..45767	PHAGE_Bacill_WBeta_NC_007734: conserved phage protein; PP_02710; phage(gi85701424)	5.86e-49	Showinfo_outline
26	complement(45939..46220)	hypothetical; PP_02711	0	Showinfo_outline
27	46245..46625	PHAGE_Bacill_phBC6A52_NC_004821: endonuclease; PP_02712; phage(gi31415846)	7.58e-33	Showinfo_outline
28	46760..47188	PHAGE_Bacill_phBC6A52_NC_004821: Terminase small subunit; PP_02713; phage(gi31415847)	7.91e-19	Showinfo_outline
29	47341..48930	PHAGE_Bacill_phBC6A52_NC_004821: Terminase large subunit; PP_02714; phage(gi31415848)	0	Showinfo_outline
30	complement(48964..49233)	hypothetical; PP_02715	0	Showinfo_outline
31	49283..50500	PHAGE_Bacill_phBC6A52_NC_004821: Portal protein; PP_02716; phage(gi31415850)	0	Showinfo_outline
32	50547..51047	PHAGE_Clostr_phi3626_NC_003524: putative prohead protease; PP_02717; phage(gi20065968)	6.83e-40	Showinfo_outline
33	51064..52455	PHAGE_Bacill_phBC6A52_NC_004821: prohead protease; PP_02718; phage(gi31415852)	4.65e-156	Showinfo_outline
34	52458..52721	PHAGE_Bacill_phBC6A52_NC_004821: hypothetical protein; PP_02719; phage(gi31415853)	1.27e-33	Showinfo_outline
35	52762..53031	PHAGE_Bacill_phBC6A52_NC_004821: hypothetical protein; PP_02720; phage(gi31415854)	1.37e-44	Showinfo_outline
36	53054..53353	PHAGE_Bacill_phBC6A52_NC_004821: hypothetical protein; PP_02721; phage(gi31415855)	7.41e-41	Showinfo_outline
37	53403..53720	PHAGE_Bacill_phBC6A52_NC_004821: hypothetical protein; PP_02722; phage(gi31415856)	1.47e-40	Showinfo_outline
38	53727..54350	PHAGE_Bacill_phBC6A52_NC_004821: hypothetical protein; PP_02723; phage(gi31415857)	1.08e-106	Showinfo_outline
39	54356..54745	PHAGE_Bacill_phBC6A52_NC_004821: hypothetical protein; PP_02724; phage(gi31415858)	1.39e-57	Showinfo_outline
40	54832..54963	hypothetical; PP_02725	0	Showinfo_outline
41	54991..58236	PHAGE_Bacill_phBC6A52_NC_004821: hypothetical protein; PP_02726; phage(gi31415859)	1.04e-156	Showinfo_outline
42	58308..58640	PHAGE_Bacill_phIS3501_NC_019502: phage tail component; PP_02727; phage(gi422934339)	1.85e-06	Showinfo_outline
43	58642..59748	PHAGE_Clostr_phiCT19406C_NC_029006: endopeptidase/tail protein; PP_02728; phage(gi971821559)	1.11e-05	Showinfo_outline
44	59762..60007	hypothetical; PP_02729	0	Showinfo_outline
45	60020..60304	hypothetical; PP_02730	0	Showinfo_outline
46	60454..61461	PHAGE_Bacill_1_NC_009737: hypothetical protein; PP_02731; phage(gi155042949)	4.42e-18	Showinfo_outline
47	61483..62028	PHAGE_Bacill_vB_BceS_MY192_NC_048633: tail length tape-measure protein; PP_02732; phage(gi100057)	5.76e-37	Showinfo_outline
48	62061..62138	hypothetical; PP_02733	0	Showinfo_outline
49	62153..62845	PHAGE_Bacill_Phrodo_NC_031100: minor tail protein; PP_02734; phage(gi100056)	2.41e-73	Showinfo_outline
50	complement(62908..63444)	hypothetical; PP_02735	0	Showinfo_outline
51	63466..63945	hypothetical; PP_02736	0	Showinfo_outline
52	64053..65306	PHAGE_Bacill_Gamma_NC_007458: FtsK/SpoIIIE family protein; PP_02737; phage(gi77020190)	1.48e-96	Showinfo_outline
53	65335..65853	PHAGE_Bacill_1_NC_009737: hypothetical protein; PP_02738; phage(gi158348415)	1.32e-19	Showinfo_outline
54	65902..66087	hypothetical; PP_02739	0	Showinfo_outline
55	complement(66315..66917)	hypothetical; PP_02740	0	Showinfo_outline
56	66315..66332	attR	0	Showinfo_outline
57	66968..67387	hypothetical; PP_02741	0	Showinfo_outline
58	67435..69306	PHAGE_Bacill_SP_15_NC_031245: prohead protease; PP_02742; phage(gi100150)	1.06e-22	Showinfo_outline
	Hits against Virus and Prophage Database
	Hits against Bacterial Database or GenBank File
